# Supplementary material for: Formal Meta-Analysis of Hypoxic Gene Expression Profiles Reveals a Universal Gene Signature
Source: Biomedicines. 2022 Sep 8;10(9):2229. doi: 10.3390/biomedicines10092229 (PMC9496516; doi:10.3390/biomedicines10092229)
Supplement: Supplementary file 1 [file biomedicines-10-02229-s001.zip]

Archive with 11 entries (11 files):
- S10_MAvsHM.csv
- S1_oriStudies.csv
- S2_FrequncyDN.csv
- S3_FrequncyUP.csv
- S4_StudiesMetadata.csv
- S5_MetaAnRes.csv
- S6_GSEA_DN.csv
- S7_GSEA_UP.csv
- S8_CoreGenes.csv
- S9_StatMAvsHM.csv
- Supplementary.pdf
