# Supplementary material for: Formal Meta-Analysis of Hypoxic Gene Expression Profiles Reveals a Universal Gene Signature
Source: Biomedicines. 2022 Sep 8;10(9):2229. doi: 10.3390/biomedicines10092229 (PMC9496516; doi:10.3390/biomedicines10092229)
Supplement: Supplementary file 1 [file biomedicines-10-02229-s001.zip › S1_oriStudies.csv]

GSE_ID	O2	Hx_time	CT
GSE101526	21, 1	0, 24	HCT116
GSE104193	0.5, 21	24, 0	MDA-MB-231, MCF10A
GSE106305	21, 0.2	0, 24	PC3, LNCaP
GSE107029	0.2, 21	12, 24	HUVEC
GSE108013	3, 21	24, 0	Brain_tumor_primary
GSE108676	1, 21	24, 0	iPS_cardio
GSE108833	21, 1	0, 24	MDA-MB-231
GSE111570	21, 1	24	ESF, DSC
GSE112137	21, 1	24, 48	IPS_brain
GSE114519	21, 1	0, 40	NK
GSE117192	10, 1	0, 6	iPS_cardio
GSE118046	21, 3	4, 48	dental_pulp
GSE118530	21, 1	0, 6	HUVEC
GSE120523	21, 1	0, 8	EA.Hy926
GSE120675	1, 21	16, 0	HeLa
GSE120886	21, 0.5	0, 16	HPTEC_HCK8, HepG2
GSE123856	21, 1	0, 16	UFH-001
GSE131378	0.5, 21	48, 0	A549, MCF-7
GSE131379	21, 0.2	0, 24	HeLa
GSE132624	21, 1	0, 12, 24, 48	501mel, IGR37, IGR39
GSE135487	0.1, 21	24, 0	Patient_Derived_Neuroblastoma
GSE136908	21, 2	0, 12, 24, 48	HMVEC
GSE139673	21, 1	0, 24	AsPC-1
GSE139678	1, 21	8, 0	HUVEC
GSE144424	10, 1	6	iPS_cardio
GSE144527	21, 5, 1	6, 24	K562
GSE145108	21, 1	0, 24	RKO, A549, H460
GSE145774	NA, 1, 21	0, 24, 6	HUVEC
GSE149132	21, 0.5	0, 48	T47D
GSE151610	21, 0.5	0, 4	ARPE-19
GSE153291	21, 1	24	MCF-7
GSE157231	0.5, 21	24, 6, 0	PAEC
GSE163827	21, 0.2	0, 24	HBMVEC, HPAEC
GSE53510	21, 1	0, 8, 24, 48	HPMEC
GSE60217	1, 21	24, 0	HUVEC
GSE68297	21, 1	0, 24	HCT116
GSE70330	0.1, 21	24, 0	HUVEC
GSE70544	21, 0.1	12	HPTEC_HCK8
GSE71401	21, 0.5	0, 24	MCF-7
GSE76743	21, 1	0, 48, 24	HUVEC
GSE77307	21, 1	0, 24	U87, HEB
GSE78025	21, 1, 5	0, 24	HEB, U87
GSE81513	21, 1	0, 1, 2, 24	HCT116
GSE84730	1, 21	24, 0	human_primary_pericytes
GSE89831	1, 21	8, 0	HUVEC
GSE89840	21, 1	0, 16	HUVEC
