# Supplementary material for: Formal Meta-Analysis of Hypoxic Gene Expression Profiles Reveals a Universal Gene Signature
Source: Biomedicines. 2022 Sep 8;10(9):2229. doi: 10.3390/biomedicines10092229 (PMC9496516; doi:10.3390/biomedicines10092229)
Supplement: Supplementary file 1 [file biomedicines-10-02229-s001.zip › S2_FrequncyDN.csv]

Gene_symbol	N
RRS1	53
GPATCH4	51
NOL6	50
NOP56	50
NOP2	48
PSME3	48
POP1	47
WDR77	47
CTPS1	46
HNRNPAB	46
MYBBP1A	45
NOLC1	45
CCT5	44
FARSB	44
LTV1	44
NOP16	44
ODC1	44
PCNA	44
PGAM5	44
SLC5A6	44
UHRF1	44
WDR4	44
BOP1	43
CDCA7	43
COA7	43
HSPH1	43
POLR1A	43
SRSF2	43
URB2	43
ABCF2	42
CBX6	42
CSE1L	42
HSP90AA1	42
HSPA8	42
PDCD11	42
PNO1	42
TMPO	42
CCT6A	41
DCTPP1	41
DDX21	41
GRWD1	41
HSPE1	41
MCM10	41
MCM6	41
MTHFD1	41
RRP9	41
RUVBL1	41
TOMM5	41
TOR3A	41
AIMP2	40
ATP5MC1	40
CDC25A	40
CYCS	40
EBNA1BP2	40
IFRD2	40
KPNA2	40
MAT2A	40
PSMG1	40
SCLY	40
TAP2	40
TMEM138	40
UTP15	40
UTP20	40
ABCE1	39
AHSA1	39
AMD1	39
ATAD3A	39
C1QBP	39
CAD	39
DCAF13	39
DKC1	39
HSPA1B	39
HSPA4	39
MCM4	39
MRTO4	39
NAA15	39
PA2G4	39
PSMD1	39
RANBP1	39
SKP2	39
SLC27A4	39
SRSF7	39
TRA2B	39
ALDH1B1	38
ANAPC7	38
CCDC86	38
CCT3	38
CHORDC1	38
DNAJA1	38
DPH2	38
EEF2KMT	38
ETF1	38
FUS	38
GTPBP4	38
HSPD1	38
IDH3A	38
LMNB1	38
MCM3	38
NCL	38
NIP7	38
NME1	38
NOL11	38
NOP58	38
PNP	38
RFC3	38
RRP7A	38
SRM	38
STIP1	38
ALYREF	37
ATIC	37
BRIX1	37
BYSL	37
CCNB1	37
CLSPN	37
ELAC2	37
ELOVL6	37
G3BP1	37
LETM1	37
LRP8	37
NPM3	37
NQO1	37
PAK1IP1	37
PFAS	37
PNPT1	37
POLR3B	37
POLR3K	37
PUM3	37
SFPQ	37
TIPIN	37
TMX2	37
TTF2	37
UMPS	37
CCND1	36
CCT2	36
CD3EAP	36
CDC6	36
EEF1E1	36
EMG1	36
FAM111B	36
FH	36
FTSJ3	36
HELLS	36
HGH1	36
KIF23	36
MCM5	36
MRPL4	36
NUP188	36
PSMA3	36
RRM1	36
RRP1B	36
SNRPD1	36
SRPRB	36
TOMM40	36
TTL	36
VARS	36
C11orf98	35
CHAC2	35
DNMT1	35
EIF2B3	35
FLAD1	35
GCLM	35
GINS1	35
GINS2	35
GOT2	35
LRR1	35
MCM2	35
MCM7	35
MRPL12	35
NAE1	35
NSUN2	35
NUDC	35
PHB	35
POLE3	35
PPIF	35
PPIL1	35
SAE1	35
SRSF3	35
STARD7	35
TUBA1B	35
UBE2T	35
UNG	35
ARMC6	34
CDC20	34
DDX39A	34
DHX9	34
DNAJC9	34
DSCC1	34
DUS1L	34
EIF3J	34
EIF5A	34
ERH	34
FKBP4	34
GART	34
GCSH	34
GSR	34
HIF1A	34
LMNB2	34
LSM10	34
MARS	34
MPV17L2	34
MRPL3	34
NAA50	34
NUP93	34
PRELID1	34
PRPS1	34
PSMD11	34
RRP12	34
RRP15	34
RTEL1	34
SIGMAR1	34
TAF9B	34
TCOF1	34
TIMM8A	34
TUBG1	34
VCP	34
ZWINT	34
ACACA	33
AIFM1	33
ATP6V0A2	33
CCNA2	33
CCT4	33
CDC123	33
CMSS1	33
CSTF2T	33
DDX56	33
DOLK	33
EIF2S1	33
EIF4E	33
FEN1	33
FKBP5	33
GINS3	33
GNL3L	33
HEATR1	33
HMGB1	33
HMGN2	33
ID3	33
ILF2	33
LARS2	33
LRRC59	33
LSG1	33
MAK16	33
MRPL35	33
MSTO1	33
NASP	33
NDUFAF4	33
PIGW	33
POLE2	33
PPRC1	33
PRMT3	33
PSMA4	33
PSMA5	33
PUS1	33
RIOX2	33
RRM2	33
RRP36	33
SDF2L1	33
SLC43A2	33
SPOUT1	33
TIMM17A	33
TRAP1	33
WDR43	33
WDR76	33
ZMPSTE24	33
ZNF367	33
ZWILCH	33
AEN	32
ARHGAP11A	32
ARHGDIA	32
ATAD2	32
CCND3	32
CCT7	32
CS	32
DHX37	32
E2F1	32
EIF4G1	32
FAM98A	32
GEMIN5	32
HMGB3	32
HNRNPM	32
HNRNPR	32
HSP90AB1	32
IARS	32
IDE	32
IPO4	32
L3MBTL2	32
LIG3	32
LYAR	32
METTL1	32
MGST1	32
MRPL20	32
MRPL24	32
PARP1	32
POLR3H	32
PRPF19	32
PSMC2	32
PSMD12	32
RANGAP1	32
RBM14	32
RNASEH1	32
SACS	32
SF3A3	32
SRSF1	32
TOE1	32
TUBA1C	32
TXNRD1	32
UBIAD1	32
UTP14A	32
WDR62	32
XPO5	32
ANKRD52	31
ATAD3B	31
ATR	31
BIRC5	31
CACYBP	31
CCDC137	31
CENPM	31
CENPN	31
CHAF1A	31
CHAF1B	31
CHUK	31
COPS3	31
CPT1A	31
DHCR24	31
DHX29	31
EXO1	31
EXOSC2	31
EXOSC9	31
FASTKD2	31
GFM1	31
GGCT	31
GPAM	31
H2AFZ	31
ILF3	31
MON1A	31
MYBL2	31
NIFK	31
NUP35	31
PLK1	31
PRDX1	31
PSMB2	31
PSMC5	31
RAB5IF	31
RBM12	31
SAPCD2	31
SCFD2	31
SELENOI	31
SNAPC5	31
TCP1	31
TIMM10	31
TIMM23	31
TIMM8B	31
TMEM97	31
TONSL	31
TRIP13	31
TYMS	31
WDR46	31
ASF1A	30
AUP1	30
BCCIP	30
BEND3	30
CDCA8	30
CEP78	30
CHD4	30
CTU2	30
EEF1AKNMT	30
EIF5B	30
ERVK3-1	30
ESCO2	30
HAUS7	30
HNRNPC	30
HSPA1A	30
ICMT	30
IMP4	30
KITLG	30
LARP4	30
MAPRE1	30
MARS2	30
MRPL15	30
MRPL46	30
MRPS12	30
NDUFAF8	30
NOP9	30
PBK	30
PIK3R3	30
PPA1	30
PPARGC1B	30
PPM1G	30
PPP2CA	30
PSMC3	30
PSMD14	30
RABEPK	30
RCC1	30
RIOX1	30
SKA3	30
SLC25A19	30
SPRTN	30
SRP19	30
SRXN1	30
TMEM199	30
TMEM201	30
TRMT6	30
USP13	30
WDHD1	30
WDR12	30
ABCF1	29
ACOT7	29
ACTB	29
ASF1B	29
AURKA	29
BAG2	29
BCLAF1	29
BRI3BP	29
C20orf27	29
CENPO	29
DTYMK	29
E2F2	29
FAM136A	29
FAM83D	29
FANCI	29
FUBP1	29
GSPT1	29
HAT1	29
HNRNPA2B1	29
HNRNPD	29
HSPA14	29
KAT2A	29
KIF11	29
LAP3	29
MAD2L1	29
MRPL47	29
MTOR	29
NCLN	29
NDUFS6	29
NMT1	29
NOL10	29
NUP85	29
OGFOD1	29
PGD	29
PHF19	29
PKMYT1	29
POLA2	29
POLR1B	29
POP5	29
PSMC4	29
PSME2	29
QTRT2	29
RFK	29
SDC1	29
SERBP1	29
SLC19A1	29
SLC25A33	29
SLC25A44	29
SLC35B1	29
SNRNP25	29
SNRPF	29
TMEM109	29
TPX2	29
TRIM14	29
TRMT61A	29
TTC4	29
TUBB4B	29
TUFM	29
TWNK	29
UTP4	29
WDR35	29
APEH	28
ARIH2	28
ATF5	28
ATP6V0B	28
BOLA2B	28
C8orf33	28
CCNE2	28
CCNF	28
CDC45	28
CENPU	28
CENPW	28
CIAPIN1	28
COG2	28
COTL1	28
DDX19A	28
DHX33	28
DNAJB1	28
DNAJC2	28
DTL	28
EARS2	28
ERCC6L	28
EWSR1	28
FANCA	28
FASN	28
GPD1L	28
HSD17B10	28
HSPA9	28
JTB	28
LARP1	28
MELK	28
MFN2	28
MKI67	28
MRPS28	28
NAA10	28
NCAPH	28
NCR3LG1	28
NDUFS1	28
NOC2L	28
NOP14	28
NSMCE4A	28
NTMT1	28
NUP155	28
NUP98	28
PCYT2	28
PDCD5	28
PIK3R4	28
PNPO	28
POLR3E	28
POP7	28
PRC1	28
PSAT1	28
PSMD3	28
PUF60	28
RABEP1	28
RAD54L	28
RBL1	28
RBM28	28
RFC5	28
SCARA3	28
SF1	28
SLC20A1	28
SLC52A2	28
SMC4	28
SNHG3	28
SNRNP40	28
SPC24	28
SSB	28
TACC3	28
TACO1	28
TIMM13	28
TMEM147	28
TRAPPC4	28
TSFM	28
TSN	28
UCK2	28
WDR3	28
WDR5	28
WDR75	28
XRCC5	28
YARS	28
ZC3H15	28
ADCY3	27
ADGRA3	27
ANAPC1	27
ANXA7	27
ARPC5L	27
ATP1B3	27
ATP6V0E2	27
BCYRN1	27
BUB1B	27
CEBPZ	27
CISD3	27
CLN6	27
CSTF2	27
CYB561	27
DANCR	27
DDX28	27
DDX5	27
DFFA	27
DIMT1	27
DNAJC11	27
EIF1AX	27
EIF2B1	27
EMC8	27
FAM98B	27
GMNN	27
GNPDA1	27
GTF2H2C_2	27
GTF3C6	27
GYG1	27
H3F3B	27
HMGA1	27
KHSRP	27
KIF22	27
MAP2K3	27
MFSD5	27
MRPL18	27
MRPS16	27
MRPS23	27
MRPS7	27
NARS	27
NCEH1	27
NDC1	27
NDOR1	27
NHP2	27
NIPA2	27
NOL12	27
PARPBP	27
PPP2R1B	27
PRKDC	27
PRMT6	27
PSMA7	27
PSMB3	27
RAE1	27
RFC2	27
RPA2	27
RPL7L1	27
SCO1	27
SFXN2	27
SLC25A10	27
SLC25A12	27
SLIRP	27
SMC1A	27
SPR	27
SRSF10	27
STAT1	27
STMN1	27
STRAP	27
SUOX	27
SUPT16H	27
TALDO1	27
TFAM	27
TMEM177	27
TMEM33	27
TSEN15	27
TXN	27
UBB	27
USP39	27
VPS9D1-AS1	27
XRCC6	27
ADSL	26
ANAPC13	26
AURKB	26
B4GALT5	26
BANF1	26
BLM	26
BRCA1	26
BRMS1	26
CDC25B	26
CDC7	26
CDK1	26
CENPE	26
CHCHD3	26
CIP2A	26
COA4	26
COPS7B	26
COQ3	26
CYC1	26
DARS2	26
DDX20	26
DDX31	26
DHX15	26
DLD	26
DNAJA3	26
EFTUD2	26
EXOSC4	26
FABP5	26
FARSA	26
FOXM1	26
FOXRED2	26
GAR1	26
GEMIN4	26
GINS4	26
GLYR1	26
H2AFX	26
HACD3	26
HIGD1A	26
HMGCS1	26
HNRNPF	26
HNRNPU	26
ITGA6	26
JPT1	26
KLHL18	26
LAS1L	26
LBR	26
LSM2	26
MDN1	26
MRPS26	26
MSH2	26
NACC1	26
NCBP1	26
NCDN	26
NUP205	26
OTUD6B	26
POLA1	26
POLD2	26
POLDIP2	26
POLR2B	26
POLR2K	26
POLR2L	26
PRPF4	26
PTGES2	26
PYCR3	26
RACGAP1	26
RAN	26
RCC2	26
RECQL4	26
RPP40	26
SAMHD1	26
SCRIB	26
SEH1L	26
SENP3	26
SF3B4	26
SFXN4	26
SLC25A5	26
SLC35B4	26
SLC35F6	26
SLC36A1	26
SNRPC	26
SNRPG	26
SORD	26
SPAG5	26
SRPK1	26
SYNCRIP	26
TCHP	26
TELO2	26
TEX261	26
THOP1	26
TIMELESS	26
TMEM126B	26
TMEM70	26
TOMM40L	26
TOP1	26
TRIM26	26
TRMT10C	26
TTLL12	26
U2SURP	26
UBE2S	26
UBTF	26
UCHL5	26
URB1	26
USB1	26
VRK1	26
AAGAB	25
ABCD3	25
ATG3	25
ATP5F1B	25
ATP5MC3	25
BLMH	25
BUB1	25
CCNE1	25
CENPB	25
DDIAS	25
DDX23	25
DDX46	25
DHFR	25
DNAJB11	25
EXOG	25
FAR1	25
FASTKD5	25
FECH	25
FERMT1	25
GMPS	25
GNL2	25
HIRA	25
HMBS	25
ID1	25
KARS	25
KPNA1	25
KRI1	25
LSM5	25
MLKL	25
MPHOSPH6	25
MRPL36	25
MRPL41	25
MRPS10	25
MRPS34	25
MTA2	25
NDC80	25
NDUFAB1	25
NDUFAF2	25
NDUFS5	25
NES	25
NEU3	25
NUP50	25
PDCD2	25
PDSS1	25
PHF5A	25
POLE	25
POLR1C	25
POP4	25
PPIH	25
PRMT5	25
PSME4	25
PTDSS1	25
PTTG1	25
RCL1	25
RFC4	25
RRP7BP	25
SDAD1	25
SLC25A13	25
SLC25A15	25
SLC26A2	25
SLC7A11	25
SNRPE	25
SRRT	25
TANGO6	25
TCF19	25
TNPO1	25
TOMM6	25
TPM3	25
TRUB2	25
UBLCP1	25
UTP18	25
ZMYND19	25
ACAT2	24
ACTL6A	24
ADAT1	24
ALG1	24
ATP2A2	24
ATP5MF	24
AURKAIP1	24
C1orf216	24
C7orf50	24
CALM2	24
CDK4	24
CENPX	24
CHRNA5	24
CKS1B	24
CLPTM1L	24
CNDP2	24
CNPY2	24
COA3	24
CPSF2	24
CTSC	24
CYREN	24
DDX10	24
DDX27	24
DDX3X	24
DDX52	24
DHX30	24
DKK1	24
DLGAP5	24
DOLPP1	24
DUT	24
E2F4	24
EIF4A1	24
EIF5	24
ELOVL5	24
ERCC2	24
FAM208B	24
FBXO5	24
FDFT1	24
GATAD2A	24
GEMIN6	24
GNL3	24
GNPNAT1	24
GOT1	24
HARS	24
HCFC1	24
HNRNPA3	24
HYAL2	24
IDH1	24
ISOC1	24
JMJD4	24
KBTBD6	24
KIAA0391	24
KIF18B	24
KIF20B	24
KIF4A	24
KNOP1	24
LARS	24
LRRC8D	24
LSM3	24
LYSMD2	24
MAGOHB	24
MAPKAPK3	24
METTL3	24
METTL7A	24
MRPL38	24
MRPL50	24
MRPL52	24
MRPL58	24
MRPS15	24
MRPS18C	24
MTRR	24
NCAPG2	24
NDUFC2	24
NETO2	24
NFS1	24
NGRN	24
NOC4L	24
NR2C2AP	24
NUP107	24
NUP88	24
NXPE3	24
OIP5	24
OXCT1	24
PGP	24
PITHD1	24
POGLUT1	24
POLR2G	24
PREB	24
PRMT1	24
PRPF31	24
PSMB5	24
PSMC1	24
PSMC3IP	24
PSMD2	24
PSMD6	24
PTPN1	24
RBBP8	24
RIOK1	24
RPF1	24
RPP25	24
RTN4IP1	24
SCAMP3	24
SEC11C	24
SEC23B	24
SGK1	24
SHMT1	24
SLC48A1	24
SMIM12	24
SNHG1	24
SNRPD3	24
SYNGR2	24
TBL3	24
TEDC2	24
TFB2M	24
TIGAR	24
TIMM22	24
TMEM104	24
TMEM19	24
TMEM38B	24
TRMT112	24
TRNT1	24
TTC27	24
TXNDC9	24
UQCC2	24
UQCRFS1	24
USP14	24
USP5	24
XPO4	24
ZBTB9	24
AATF	23
ABCG2	23
AFG3L2	23
AHCY	23
AP1B1	23
AREL1	23
ATF7IP	23
AUNIP	23
BAZ1A	23
BCL2L12	23
BCS1L	23
C12orf4	23
CCDC138	23
CCNQ	23
CDC37	23
CDCA5	23
CHAMP1	23
CNOT9	23
CRELD2	23
CSTF3	23
DBF4	23
DNA2	23
E2F8	23
ECHDC1	23
EXOSC3	23
FAM217B	23
FANCD2	23
FBXO22	23
FDX2	23
FJX1	23
G6PD	23
GLRX2	23
GLRX3	23
GTF2H2	23
HNRNPDL	23
HNRNPL	23
HYOU1	23
ISG20L2	23
KIF15	23
KIF20A	23
KPNA3	23
KPNA4	23
LDHB	23
LLPH	23
LTBR	23
LY6E	23
LYPLA1	23
MCM8	23
MCMBP	23
MCRS1	23
MLEC	23
MRPL16	23
MRPL27	23
MRPL34	23
MRPS11	23
MTAP	23
NCAPG	23
NDUFA9	23
NOL9	23
NUDT5	23
NUP160	23
OAS3	23
ORC5	23
PARK7	23
PCLAF	23
PCYT1A	23
PIR	23
POLD1	23
PPP5C	23
PRDX3	23
PSEN2	23
PSMB6	23
PSMB7	23
PSMG3	23
PSPC1	23
PTBP1	23
PTPMT1	23
PYCR1	23
RAD51D	23
RARS	23
RCBTB1	23
RCC1L	23
RPS6KA4	23
RSAD1	23
SAR1B	23
SDHB	23
SEPHS1	23
SHCBP1	23
SLC29A1	23
SNHG4	23
SSBP1	23
SSR3	23
STOML2	23
SUB1	23
SUV39H1	23
TEAD4	23
THEM4	23
TOMM22	23
TOMM70	23
TRMT1	23
TYRO3	23
UBR7	23
UTP3	23
VBP1	23
WASHC5	23
WBP11	23
WDR82	23
XRCC2	23
ZNF207	23
ZNF593	23
AASDHPPT	22
ADAR	22
ADAT2	22
ADRM1	22
ASNSD1	22
ATP5F1A	22
BRIP1	22
C12orf43	22
CAMKK2	22
CBWD5	22
CCDC66	22
CCT8	22
CDC42SE1	22
CDK12	22
CENPV	22
CEP55	22
CHCHD4	22
CHEK1	22
CHTF18	22
COPS6	22
CYB5B	22
DAP3	22
DDX11	22
DDX49	22
DDX54	22
DEPDC1B	22
DHDDS	22
DHX35	22
DHX57	22
DIS3L	22
DLAT	22
ELAVL1	22
EMC6	22
EML4	22
EMP2	22
ENDOD1	22
EPHX1	22
ESPL1	22
EZH2	22
FOSL1	22
GEN1	22
GMFB	22
GMPPB	22
GPN1	22
H2AFV	22
H2AFY	22
HCCS	22
HEATR3	22
HMGCR	22
HMOX1	22
IDI1	22
KIF1C	22
KNL1	22
KNSTRN	22
KPNB1	22
LIG1	22
MANF	22
MBNL3	22
ME2	22
MFSD1	22
MIR17HG	22
MMP15	22
MRPL11	22
MRPS35	22
MTDH	22
MTREX	22
MYCBP	22
MYO19	22
NAXE	22
NCAPH2	22
NDUFB9	22
NOL8	22
NSD2	22
NUF2	22
NUP153	22
NUP62	22
OAF	22
OPA1	22
PCNX3	22
PCYOX1L	22
PHB2	22
PIMREG	22
PISD	22
PITPNA	22
POC1A	22
POLQ	22
PPID	22
PREX1	22
PRKAR2A	22
PRPF40A	22
PSMC6	22
PSMD13	22
RAD51	22
RAD51AP1	22
RNPS1	22
RPS19BP1	22
RPUSD2	22
RRP1	22
RTCB	22
SART3	22
SBDSP1	22
SEC23IP	22
SET	22
SHLD2	22
SLBP	22
SNRPB	22
SOGA1	22
SRPRA	22
SSRP1	22
STIL	22
SUV39H2	22
SVIP	22
TARDBP	22
TFDP1	22
TGS1	22
TIMM44	22
TMEM106C	22
TRIM27	22
TRIM35	22
TRMT2A	22
TROAP	22
TSEN2	22
TSEN54	22
TSSC4	22
TSTA3	22
TUBB	22
TUBB2A	22
UBE2G2	22
UBE2N	22
UROD	22
VANGL1	22
VMA21	22
VWA8	22
WARS	22
WDR34	22
WDR36	22
WDR73	22
YRDC	22
ZC3HC1	22
ZNHIT6	22
ABCC4	21
ACP2	21
ADI1	21
ADSS	21
AGPS	21
ALDH3A2	21
ALG3	21
ALG8	21
ALKBH8	21
ANLN	21
API5	21
ASRGL1	21
BAK1	21
BAZ1B	21
BMS1	21
C7orf43	21
CALM1	21
CCAR2	21
CCNB2	21
CDCA3	21
CDKN3	21
CENPK	21
CISD1	21
CKS2	21
CUL2	21
CWF19L1	21
DCBLD2	21
DDX1	21
DESI1	21
DGCR8	21
DNTTIP2	21
DRG1	21
DTD2	21
DYNLL1	21
EIF2AK2	21
ERAL1	21
FAM86C1	21
FHOD1	21
FPGS	21
GCDH	21
GLRX5	21
GPS1	21
GTF2A2	21
HACD2	21
HAUS2	21
IFI30	21
IPO11	21
IPO5	21
LPCAT3	21
LRWD1	21
LSM4	21
MAPKAP1	21
MFSD14B	21
MRFAP1	21
MRPL19	21
MRPL51	21
MRPS27	21
NACC2	21
NAT10	21
NAV3	21
NCAPD3	21
NDUFV2	21
NF2	21
NLN	21
NOC3L	21
NOL7	21
NOP10	21
NPLOC4	21
NUDT16	21
NUS1	21
NUSAP1	21
ORC1	21
PAQR4	21
PASK	21
PDE12	21
PHF23	21
PLEKHB2	21
PMM2	21
POGK	21
POLR2C	21
POLR2D	21
POLR2E	21
POLR2F	21
PPT1	21
PRMT7	21
PSMB4	21
PSMD7	21
PTGES3	21
PYCR2	21
RAB5C	21
RABL6	21
RAD18	21
RBM19	21
RBMXL1	21
RFX5	21
RNASEH2A	21
RPS26	21
RPUSD1	21
RXYLT1	21
SACM1L	21
SAR1A	21
SEC61B	21
SKA2	21
SLC25A20	21
SLC25A32	21
SLC39A3	21
SLC3A2	21
SLC4A7	21
SMARCA4	21
SMARCD1	21
SMARCD2	21
SNU13	21
SOAT1	21
SQSTM1	21
SUMO3	21
TCTN3	21
TDG	21
TEX2	21
TFRC	21
THADA	21
TKT	21
TMA7	21
TNPO2	21
TOP2A	21
TRAF3	21
TRAPPC3	21
TRIM28	21
TSR1	21
TUBB6	21
TWISTNB	21
U2AF2	21
UBE2C	21
UBQLN4	21
USP1	21
USP38	21
USP46	21
UTP11	21
VKORC1L1	21
WDR18	21
XRCC3	21
YTHDF1	21
YTHDF2	21
YWHAB	21
ZC3H18	21
ZNF587B	21
ABHD5	20
ACTR1A	20
ALDH4A1	20
ANAPC5	20
AP4B1	20
ARHGAP18	20
ARHGEF26	20
ARSB	20
ASPM	20
ATP5PB	20
ATP5PF	20
ATP6V0D1	20
ATRIP	20
B3GALT6	20
BOLA3	20
BUD23	20
C19orf48	20
C1orf112	20
C1orf122	20
CASKIN2	20
CBR1	20
CCNH	20
CENPI	20
CFAP298	20
CLTB	20
CLTC	20
COMMD5	20
COPS9	20
CTNS	20
CUL3	20
CYB561A3	20
DCLRE1B	20
DDX24	20
DEPDC1	20
DIAPH1	20
DNAAF5	20
DPAGT1	20
ECT2	20
EIF4G2	20
EIF6	20
ELMO2	20
ENTPD7	20
EXOSC8	20
FAM118B	20
FAM120A	20
FAM198B	20
FDX1	20
FEM1A	20
FKBP3	20
GTF3A	20
GTSE1	20
HACL1	20
HAUS8	20
HECW2	20
HMOX2	20
HSPBP1	20
HTATSF1	20
INCENP	20
INTS7	20
IPO9	20
ITPK1	20
KIAA0586	20
KIAA0930	20
KIF1BP	20
KIF21A	20
KIF24	20
KIF2C	20
KLHL21	20
KLHL42	20
LANCL1	20
LSM1	20
LSM7	20
MAGOH	20
MCCC2	20
MED22	20
MINOS1	20
MIPEP	20
MIS12	20
MOCOS	20
MRM2	20
MRPL21	20
MRPL22	20
MRPL37	20
MRPL57	20
MRPL9	20
MRPS17	20
MSH6	20
MUL1	20
NBN	20
NCAPD2	20
NDST1	20
NDUFB6	20
NECAP1	20
NECTIN1	20
NOM1	20
NTHL1	20
NUCKS1	20
NUFIP1	20
NUP43	20
OGDH	20
ORC6	20
PABPC4	20
PAQR3	20
PDCD2L	20
PFDN2	20
PITPNB	20
PLA2G4A	20
PMPCA	20
PPP1R10	20
PRDX6	20
PTCD3	20
PTS	20
RAB35	20
RANBP2	20
RBM26	20
RPL22L1	20
SAMM50	20
SCO2	20
SELENOT	20
SETD1B	20
SF3B3	20
SGTA	20
SHQ1	20
SKA1	20
SLC1A5	20
SLC25A25	20
SLC25A3	20
SLC35D1	20
SLC35G1	20
SNF8	20
SNHG15	20
SNRPA1	20
SPC25	20
SPCS3	20
SPDL1	20
SRRM1	20
SRSF6	20
SRSF8	20
SSX2IP	20
SURF2	20
TARS	20
TIMM10B	20
TIMM50	20
TMA16	20
TMEM237	20
TRIM25	20
TRMT12	20
TTC38	20
TTI1	20
TTK	20
TUBGCP4	20
TYW1	20
TYW3	20
UBL4A	20
UBP1	20
UBQLN1	20
VPS36	20
YKT6	20
YTHDC2	20
ZBTB24	20
ZC3H7B	20
ZNF618	20
ZNF689	20
ZPR1	20
ABHD16A	19
ABHD3	19
ADAMTS1	19
AFG3L1P	19
AHCTF1	19
ALG6	19
AQR	19
ARMC7	19
ASNA1	19
AZIN1	19
BARD1	19
BORA	19
BZW2	19
C1orf109	19
CAPRIN1	19
CBFB	19
CCDC97	19
CDK2	19
CDK5RAP1	19
CDK5RAP2	19
CENPS	19
CEP41	19
CHCHD10	19
CHST3	19
CLP1	19
CNBP	19
COA6	19
COASY	19
COMMD4	19
COQ2	19
CPSF3	19
CYP51A1	19
DAZAP1	19
DCPS	19
DCTN5	19
DDB1	19
DEF8	19
DHX36	19
DHX8	19
DLEU2	19
DNAJB12	19
DNAJC8	19
DNMT3B	19
DPH3	19
DROSHA	19
DSN1	19
EIF3B	19
EIF3G	19
EMC3-AS1	19
EPHA2	19
EXOC6	19
FAM173B	19
FAM3C	19
FAM49B	19
FBXO30	19
FLRT2	19
FOXRED1	19
FUCA2	19
GATC	19
GCFC2	19
GDF15	19
GFOD1	19
GHITM	19
GPRIN1	19
HDDC2	19
HEATR5A	19
HERC2	19
HIBCH	19
HNRNPK	19
HSPA4L	19
HSPA5	19
ILKAP	19
ITPA	19
KIF5B	19
KLHL23	19
KMT2D	19
KMT5A	19
LACTB2	19
LAMTOR1	19
LANCL2	19
LDLRAP1	19
LMNA	19
LRRC20	19
LZTR1	19
M6PR	19
MAEA	19
MALL	19
MCM3AP	19
METTL2B	19
METTL8	19
MIR22HG	19
MMS22L	19
MPHOSPH10	19
MRPL30	19
MRPS25	19
MTMR6	19
NAA25	19
NAA38	19
NCOA5	19
NCS1	19
NDUFAF5	19
NDUFB10	19
NDUFB2	19
NEIL3	19
NLE1	19
NPM1	19
NSMAF	19
NUDT3	19
NXT1	19
PAGR1	19
PBX1	19
PCSK7	19
PDCL3	19
PDF	19
PDRG1	19
PFKM	19
PINX1	19
PLEKHJ1	19
POLR1E	19
PPAT	19
PRIM2	19
PSMA2	19
PSMD8	19
PTCD1	19
QDPR	19
QTRT1	19
RABGGTB	19
RAD51C	19
RBM42	19
REXO4	19
RPA1	19
RPAP3	19
RPF2	19
RPP30	19
RUVBL2	19
SAAL1	19
SEPHS2	19
SLC12A9	19
SLC25A11	19
SLC25A17	19
SLC25A22	19
SLC25A35	19
SLC35A4	19
SLC35C1	19
SLC4A2	19
SLF1	19
SMG8	19
SNX5	19
SPATA5	19
SSNA1	19
STEAP1	19
STRIP2	19
TAOK2	19
TARBP2	19
TBC1D30	19
TGFBRAP1	19
THAP12	19
TM7SF3	19
TMEM167A	19
TOR1A	19
TRIAP1	19
U2AF1	19
UBE2G1	19
UBE2K	19
UBE2L3	19
UBE3C	19
UPF1	19
USP10	19
YWHAH	19
ZDHHC14	19
AARSD1	18
ABHD2	18
ACLY	18
ADAMTS9	18
ADK	18
AGK	18
AKAP1	18
ANAPC2	18
ANKRD40	18
ARFGAP2	18
ARFRP1	18
ARNTL2	18
ASNS	18
ATOX1	18
ATP5MPL	18
B3GALNT1	18
BAG3	18
BCAS2	18
BCL2	18
BOLA2-SMG1P6	18
C19orf47	18
C5orf22	18
C9orf78	18
CARNMT1	18
CBX3	18
CDCA4	18
CDV3	18
CEMIP2	18
CENPF	18
CEP85	18
CHCHD1	18
CHST10	18
CHST11	18
CKAP2	18
CKLF	18
CLCN5	18
CLUH	18
CPSF6	18
CROT	18
CTNNAL1	18
CUL1	18
DCAF1	18
DCAF7	18
DCXR	18
DDX18	18
DDX39B	18
DDX51	18
DEK	18
DHCR7	18
DIAPH3	18
DNAJB4	18
DPH7	18
DUS3L	18
DYNLL2	18
EDEM3	18
EIF3I	18
ELOF1	18
EMP1	18
ENAH	18
ENOPH1	18
EP400	18
ERLIN1	18
FAM111A	18
FAM126A	18
FANCE	18
FUBP3	18
GABPB1	18
GALNT10	18
GALNT7	18
GARS	18
GDAP1	18
GFM2	18
GOLM1	18
GTF2H2B	18
GTF2H3	18
HASPIN	18
HJURP	18
HMGN1	18
HMMR	18
HNRNPH1	18
HSPB1	18
IPO7	18
ISOC2	18
IVD	18
IWS1	18
KCNC4	18
KIAA0100	18
KIFC1	18
KLHDC4	18
KLHL13	18
KNTC1	18
KRT80	18
LCMT2	18
LEPROTL1	18
LRRC14	18
LYPLA2	18
LYRM2	18
LYRM7	18
MANEAL	18
MAZ	18
MED1	18
MEGF9	18
METTL2A	18
MICAL2	18
MPDU1	18
MPHOSPH9	18
MRPL1	18
MRPL49	18
NAP1L4	18
NARS2	18
NBEAL2	18
NDUFA12	18
NDUFB7	18
NDUFS8	18
NEAT1	18
NEURL4	18
NFKBIB	18
NLRC5	18
NUDT21	18
NUDT4	18
OSGEP	18
PAM16	18
PARP9	18
PCCB	18
PDHA1	18
PEBP1	18
PEF1	18
PHTF1	18
PIGM	18
PITRM1	18
PLK4	18
PLPP2	18
POLD3	18
POMGNT1	18
POMZP3	18
PPA2	18
PPHLN1	18
PRCC	18
PRPF8	18
PSMB1	18
PSRC1	18
PYURF	18
QRSL1	18
RAB8A	18
RAD1	18
RAD54B	18
RANBP6	18
RBBP7	18
RBM25	18
RBM8A	18
RCN2	18
RDH10	18
RDX	18
RMDN3	18
RNGTT	18
RPL26L1	18
RWDD4	18
SCAP	18
SDHD	18
SEL1L3	18
SF3A1	18
SGMS2	18
SLC25A16	18
SLC25A28	18
SMG5	18
SNHG16	18
SNHG17	18
SNRNP70	18
SOCS4	18
SOD1	18
SPHK1	18
SUCLG1	18
TAF15	18
TBRG4	18
TCERG1	18
TEDC1	18
THBS1	18
THRAP3	18
TIMMDC1	18
TJP2	18
TLN2	18
TMEM126A	18
TMEM206	18
TMX4	18
TNRC6A	18
TP53RK	18
TPM1	18
TRAF2	18
TRIM16	18
TTPAL	18
TUBGCP3	18
UBAP2L	18
UHRF1BP1	18
VPS33A	18
XPO1	18
YARS2	18
YLPM1	18
ZBTB8OS	18
ZNF473	18
ACAD9	17
ACIN1	17
AGPAT3	17
AIFM2	17
AMDHD2	17
ARF3	17
ARMC8	17
ASAP3	17
ATAD5	17
ATE1	17
ATG4A	17
ATP5F1D	17
ATP6V1B2	17
B4GALT2	17
BLOC1S2	17
BRCA2	17
C16orf91	17
C4orf46	17
CARS2	17
CCAR1	17
CCZ1B	17
CD2BP2	17
CDC27	17
CENPA	17
CFL1	17
CHPF2	17
CIT	17
CLIC1	17
CLPB	17
CMTM6	17
CNP	17
COA1	17
COG8	17
COMMD2	17
CORO1C	17
COX11	17
CPSF4	17
CTSL	17
CYB5RL	17
CYR61	17
DBNL	17
DCLRE1A	17
DCUN1D5	17
DDX47	17
DHRS11	17
DHX34	17
DMAC1	17
DNAAF2	17
DNAJC7	17
DNM1L	17
DOCK10	17
DOHH	17
DONSON	17
DUS2	17
E2F6	17
ECD	17
EIF2B4	17
EIF2B5	17
EIF4E2	17
ELOC	17
ELP1	17
ENTR1	17
EOGT	17
ERI1	17
ESRRA	17
EXOSC1	17
FDPS	17
FGF2	17
FST	17
GAL	17
GALNT6	17
GCN1	17
GCNT2	17
GLMN	17
GLO1	17
GNPTAB	17
GPD2	17
GPN3	17
GRK6	17
GTF2F2	17
GTF3C1	17
GUF1	17
HAUS1	17
HDAC1	17
HDGF	17
HIST1H2BK	17
HM13	17
HMGA2	17
HNRNPH3	17
HSPB8	17
HYLS1	17
IFI35	17
IRAK1	17
KBTBD8	17
KIF2A	17
KLC2	17
LDB2	17
LDLR	17
LFNG	17
LIN52	17
LRFN4	17
LRRC45	17
LYPD6	17
MAP7D1	17
MBNL1	17
MCAM	17
ME1	17
METTL16	17
MID1IP1	17
MIEF1	17
MLH1	17
MMACHC	17
MPP5	17
MPZL1	17
MRPL13	17
MRPL20-AS1	17
MRPS9	17
MTHFD2	17
MTMR12	17
MTMR2	17
NABP2	17
NAF1	17
NAT8L	17
NDFIP1	17
NDUFS3	17
NEURL1B	17
NSUN5	17
NUDCD1	17
NUDT15	17
NXF1	17
OGG1	17
ORAI1	17
OSBPL11	17
OXNAD1	17
PCGF6	17
PCMT1	17
PEX26	17
PFDN6	17
PFKFB2	17
PHTF2	17
PI4KB	17
PLAA	17
[truncated: 13,363 more rows]
