# Supplementary material for: Formal Meta-Analysis of Hypoxic Gene Expression Profiles Reveals a Universal Gene Signature
Source: Biomedicines. 2022 Sep 8;10(9):2229. doi: 10.3390/biomedicines10092229 (PMC9496516; doi:10.3390/biomedicines10092229)
Supplement: Supplementary file 1 [file biomedicines-10-02229-s001.zip › S3_FrequncyUP.csv]

Gene_symbol	N
BHLHE40	67
NDRG1	67
BNIP3L	66
LDHA	66
KDM3A	65
P4HA1	65
BNIP3	64
DDIT4	64
EGLN1	64
SLC2A1	64
AK4	63
ENO2	63
ERO1A	63
PDK1	63
ZNF395	63
ANKRD37	62
MXI1	62
PLOD2	62
SLC2A3	62
ADM	61
MIR210HG	61
TMEM45A	61
C4orf3	60
TNIP1	59
ANKZF1	57
CCNG2	57
PFKFB4	57
PGM1	57
TPI1	57
GBE1	56
PGK1	56
RLF	56
ANGPTL4	55
FAM162A	55
INSIG2	55
SLC16A3	55
ALDOA	54
KDM4B	54
PFKFB3	54
PFKP	54
PLOD1	54
PNRC1	54
PPFIA4	54
ZNF292	54
EGLN3	53
ERRFI1	53
PGAM1	53
BTG1	52
PAM	52
TCAF2	52
WSB1	52
ALDOC	51
P4HA2	51
ARRDC3	50
FUT11	50
GPI	50
KDM5B	50
MAFF	50
NFIL3	50
SPAG4	50
STC1	50
STC2	50
C8orf58	49
DARS	49
ENO1	49
GAPDH	49
HILPDA	49
HK2	49
LOC154761	49
PKM	49
IGFBP3	48
LOX	48
RNASE4	48
VEGFA	48
WDR54	48
BMT2	47
FAM13A	47
LOXL2	47
MIF	47
PFKL	47
VLDLR	47
YEATS2	47
ZNF160	47
DUSP1	46
FOSL2	46
GPR146	46
IER3	46
JUN	46
LNPK	46
LRP1	46
NARF	46
PLEKHA2	46
RNF24	46
SEC61G	46
ALKBH5	45
EFNA3	45
GYS1	45
SLC25A36	45
KCTD11	44
KDM6B	44
KLF7	44
MYO1E	44
PPP1R3B	44
RNMT	44
RORA	44
S100A10	44
SNX33	44
ZNF654	44
CA9	43
CDK19	43
IPMK	43
MPI	43
PHF21A	43
PPP2R5B	43
RBPJ	43
SDAD1P1	43
SEMA4B	43
SH3D21	43
TCP11L2	43
TNS1	43
CLK1	42
DHX40	42
DNAJB2	42
JUNB	42
MAP2K1	42
PDK3	42
PPP1R13L	42
PTPRF	42
SLC6A6	42
SPRY1	42
STBD1	42
TRIB2	42
YPEL5	42
ARFGEF3	41
BCKDHA	41
FGF11	41
HIVEP2	41
HK1	41
KLHL24	41
MAFK	41
NAV1	41
PDLIM2	41
RIOK3	41
RSBN1	41
SFXN3	41
TMSB10	41
VKORC1	41
FN1	40
HBP1	40
KDM7A	40
LGALS1	40
OSMR	40
SERPINE1	40
TXNIP	40
VIM	40
APLN	39
CD109	39
CITED2	39
CREBRF	39
EFEMP2	39
EHD2	39
ESYT2	39
FOXO3	39
GOLGA8A	39
HLA-A	39
KDM4C	39
PPP1R3C	39
PTTG1IP	39
QSOX1	39
SAP30	39
SCD	39
SLC6A8	39
WASF2	39
ZBTB25	39
AHNAK	38
ARHGEF37	38
BACH1	38
CLK3	38
CSRNP1	38
FOXN3	38
HIF1A-AS2	38
NFATC4	38
OPTN	38
ORAI3	38
PLIN2	38
SLC35E1	38
TBC1D9B	38
TGFBI	38
TPD52	38
TUBA1A	38
ANO6	37
C4orf47	37
CCNI	37
DPYSL4	37
FER1L4	37
H1F0	37
HLA-B	37
INSIG1	37
IRF2BP2	37
MLLT3	37
NREP	37
P4HB	37
PIM1	37
PJA2	37
RAB20	37
SYTL2	37
WDR60	37
ANKRD12	36
BCKDK	36
CCNY	36
DDR1	36
DDX41	36
DPYSL2	36
DUSP6	36
HERC3	36
HLA-E	36
HMGCL	36
IKBIP	36
IRS2	36
PLXNA3	36
STARD4	36
AGAP1	35
CALCOCO1	35
CXCR4	35
ELL2	35
FAM210A	35
FAM219A	35
FLNB	35
GADD45B	35
GSN	35
HLA-C	35
KMT2E	35
LOC112694756	35
MINDY2	35
NPEPPS	35
PNMA2	35
RRAGA	35
SNTA1	35
SNX25	35
TSC22D3	35
UBE2O	35
ZMYM2	35
AFF4	34
ANG	34
CNOT8	34
DENND5A	34
DPCD	34
HES1	34
ITGA5	34
JMJD6	34
KHNYN	34
KLF6	34
LAMB2	34
NCKIPSD	34
PBXIP1	34
PINK1	34
PYGL	34
RAB6A	34
RASSF7	34
SERPINE2	34
SHB	34
WDR45B	34
ZBTB1	34
ZC3H6	34
AHNAK2	33
APAF1	33
ATF3	33
BCL6	33
CEP250	33
CRKL	33
CRYBG3	33
CSRP2	33
DLG4	33
EGFR	33
FAM117B	33
FBXO32	33
FKBP9	33
FNDC3B	33
GPRC5A	33
HCFC1R1	33
HERPUD1	33
ITGB4	33
LOC100129034	33
LZTS2	33
MAPK7	33
MARCKS	33
MEF2A	33
PRKAA2	33
RALGDS	33
RNF122	33
SAT1	33
SLC38A2	33
SMAD7	33
TNFAIP8	33
TNFRSF10D	33
TNXB	33
YPEL3	33
AMPD3	32
ASPH	32
CACNB3	32
CARHSP1	32
COL5A1	32
CUL7	32
DHX32	32
EIF1	32
FEM1C	32
FHL2	32
GALNT18	32
IL1RAP	32
ISG20	32
KIAA2013	32
KLF10	32
LAMB3	32
MSANTD3	32
NOL3	32
NUMA1	32
POLD4	32
PXN	32
RUNX1	32
SARAF	32
SOX4	32
SYNPO	32
TMEM158	32
TNFAIP3	32
TTC3	32
BBX	31
CEBPD	31
CRABP2	31
DDIT3	31
DIPK2A	31
EDEM1	31
FBXO42	31
GRN	31
H19	31
HELZ	31
IDH2	31
KMT2C	31
LGALS8	31
MRC2	31
PER1	31
PPL	31
PPME1	31
PSAP	31
PTGS1	31
RNF19A	31
SERTAD2	31
SMS	31
SNAPC3	31
SYDE1	31
TGFBR1	31
TPT1	31
UGP2	31
ACTG1	30
AP3S1	30
ARID3A	30
BBC3	30
BRWD3	30
C2orf72	30
CAST	30
CIART	30
CMIP	30
CSNK1E	30
EEF2	30
ETS1	30
FAM129B	30
FAM168A	30
FSTL3	30
GLG1	30
HECA	30
IDS	30
ING4	30
ITM2B	30
JMY	30
MNT	30
MXRA7	30
MYADM	30
NAMPT	30
PDGFB	30
PLAGL1	30
RIMKLA	30
RRAGD	30
SDC4	30
SERINC1	30
SEZ6L2	30
SLCO4A1	30
SMAP1	30
SMIM14	30
TANC2	30
TES	30
TMEM123	30
TNFRSF10B	30
TP53INP2	30
UACA	30
XPNPEP1	30
ZFAS1	30
ZMIZ1	30
ABCB6	29
ADD3	29
ADSSL1	29
AFAP1L1	29
APP	29
ARID5A	29
ARRDC4	29
BHLHE41	29
C1orf21	29
CA12	29
CAV1	29
CD99	29
CDKN1A	29
CDKN1B	29
CLIP3	29
COL7A1	29
DEPP1	29
DUSP3	29
EFNA1	29
EIF4B	29
FAM114A1	29
FLNA	29
GLRX	29
GOLGB1	29
HDHD5	29
HSPG2	29
LONP1	29
LPIN3	29
METRNL	29
MKRN1	29
MTFP1	29
MYH9	29
NEDD4L	29
NOG	29
NOP53	29
OBSL1	29
OLFML2A	29
PERP	29
PGRMC2	29
PLAUR	29
PPP1R15A	29
RARA	29
RNF217	29
TBC1D8B	29
TENT4A	29
TET1	29
TGFB1	29
TIPARP	29
TMBIM1	29
TNKS	29
UAP1L1	29
WDR26	29
AGRN	28
AKAP12	28
APOLD1	28
ATRN	28
CHSY1	28
COL6A1	28
CPOX	28
CTDSP1	28
CTDSP2	28
DENND4C	28
EEF1A2	28
FOXD1	28
GNAS	28
GPT2	28
HEXA	28
ID2	28
INHBA	28
ITGB1	28
KDM5C	28
LMAN1	28
MANBA	28
MMP24OS	28
N4BP3	28
NAB2	28
NEK6	28
NRN1	28
OS9	28
PAG1	28
PIGA	28
PMEPA1	28
PRKCA	28
RAB11FIP5	28
RASSF4	28
RIPK4	28
RPL3	28
RRAS	28
RYBP	28
SAMD4A	28
SAV1	28
SERPINB1	28
TMEM44	28
TMEM59	28
TRIO	28
TSKU	28
UBXN7	28
UGCG	28
ZC3HAV1L	28
ZFP36L1	28
ZMYND8	28
ACADVL	27
ALPK3	27
ATXN1	27
C14orf132	27
CCSAP	27
CDKN1C	27
CHD2	27
CLSTN1	27
COL27A1	27
DSP	27
DTNA	27
FAM160A1	27
FAM214B	27
FAM216A	27
FOS	27
GAB1	27
GABARAPL1	27
GLIS2	27
HDAC5	27
HIST1H2BD	27
INSR	27
LIMCH1	27
LRRFIP1	27
MEGF6	27
MT-RNR1	27
MT1X	27
MTMR11	27
MYO1B	27
MYOF	27
NBAS	27
NCOR2	27
NR3C1	27
PCAT6	27
PHC2	27
PIK3C3	27
PPP1R3G	27
PRSS53	27
PTCH1	27
PTPRH	27
PTPRU	27
RAB8B	27
RB1CC1	27
RCOR2	27
RSF1	27
RSRP1	27
SERINC3	27
SLC1A1	27
SLC5A3	27
TMEM74B	27
TNNT1	27
TPBG	27
YPEL2	27
ZBTB4	27
ZFYVE1	27
ZKSCAN1	27
ZSWIM5	27
ABCA1	26
ACAD11	26
ADAM12	26
ANXA2	26
ANXA5	26
ATF4	26
ATG9A	26
BTBD2	26
C1RL	26
CCDC80	26
CHD6	26
CNTNAP1	26
CRYBB2P1	26
DDT	26
EEF1A1	26
EIF4A2	26
FMNL2	26
FNBP1	26
GAS5	26
GDF15	26
H6PD	26
HIPK3	26
HSF4	26
IGF1R	26
IGFBP6	26
KDM2A	26
KMT2A	26
LCOR	26
MAP1LC3B	26
MFGE8	26
MKNK2	26
NDUFA4L2	26
NEBL	26
NGLY1	26
NLGN2	26
NOTCH3	26
NPC2	26
NUDT18	26
NYAP1	26
PGPEP1	26
PXDN	26
RASSF1	26
RBAK	26
RIC1	26
RICTOR	26
RPL13A	26
RTL8C	26
SEC24A	26
SLC29A4	26
SPOCK1	26
SUN1	26
TET2	26
TMEM263	26
TSC22D2	26
ZDHHC9	26
ZNF84	26
AJUBA	25
ARL4C	25
ARRDC2	25
CD68	25
CDCP1	25
COL5A2	25
DHRS3	25
DMTF1	25
DOCK7	25
EEF1AKMT3	25
EPOR	25
EPS8L2	25
FBXL20	25
GPR155	25
GUK1	25
HSP90B1	25
HSPA5	25
IMPAD1	25
KLF4	25
KLF5	25
LBH	25
LGALS3	25
LPIN2	25
LTBP3	25
LTBP4	25
MAGED2	25
MED13L	25
MET	25
MOB3A	25
MUC1	25
MXD1	25
NFE2L1	25
OXSR1	25
PDLIM4	25
PIK3IP1	25
PTPRB	25
RASA4	25
RRBP1	25
RSPH3	25
S100A6	25
SIAH2	25
SLC25A37	25
SLC3A2	25
SMYD2	25
TBC1D22A	25
TBC1D3L	25
TCAF2P1	25
TENT5A	25
TFPI	25
TIMP3	25
TMCC1	25
TMEM47	25
TRIQK	25
YPEL1	25
ZNF12	25
ABTB1	24
ANAPC16	24
APLP1	24
ARFGAP3	24
ARHGAP45	24
ARL10	24
BIRC3	24
BMPR2	24
BOK	24
BRK1	24
CABIN1	24
CBLB	24
CCDC28A	24
CDK18	24
CLDND1	24
CLK4	24
CLMN	24
CRIP2	24
CYR61	24
DDHD2	24
EDN1	24
ERCC5	24
FAM107B	24
FKBP8	24
FNBP1L	24
FTH1	24
GGA2	24
GLTP	24
GRAMD1A	24
ITGAV	24
ITPR1	24
KDELR3	24
KLF3	24
L1CAM	24
LETMD1	24
MBNL2	24
MEF2D	24
MN1	24
MRGBP	24
NAP1L1	24
P3H2	24
PCMTD1	24
PDIA3	24
PGF	24
PLEKHA8	24
POFUT2	24
PPP1R3E	24
PRDM1	24
PRELID2	24
PTGS2	24
PTPRM	24
RAB5B	24
RALGAPA2	24
RASSF2	24
RELA	24
RHOB	24
RNASET2	24
RPL12	24
SDCBP	24
SERPINB6	24
SH3PXD2A	24
SLC7A5	24
SMAD3	24
SMIM3	24
SNAPC1	24
SOX12	24
SPICE1	24
ST6GALNAC6	24
TAX1BP1	24
TMED10	24
TMF1	24
TRPT1	24
TTC30A	24
UBXN6	24
ULK1	24
VAT1	24
VDAC1	24
VEGFB	24
VEGFC	24
VGLL4	24
VPS37D	24
WDR66	24
XRN1	24
ZNF532	24
ZNF581	24
ABCA2	23
ABL1	23
AGO4	23
ATP2B4	23
BACE2	23
CAMLG	23
CAVIN1	23
CD82	23
CFAP36	23
CHST15	23
CIC	23
CIR1	23
COL6A2	23
CREBZF	23
CTGF	23
CTNNA1	23
CTSB	23
DCAF5	23
DDB2	23
DLGAP4	23
DOK3	23
DUSP5	23
DYNLT3	23
EEF1G	23
EPB41L4A-AS1	23
ESCO1	23
F2R	23
FAM234B	23
FANK1	23
FKBP10	23
FTL	23
GOLGA2	23
GOLGA8B	23
GTF2IRD2B	23
HIC1	23
HPCAL1	23
IER5L	23
JMJD1C	23
KRT19	23
LOC143666	23
LUCAT1	23
MAPK13	23
MAPK8IP3	23
MFSD10	23
MT2A	23
NBR1	23
NEAT1	23
NUAK1	23
OGA	23
PAQR7	23
PDLIM1	23
PHF10	23
PIAS2	23
PLAT	23
PLXNB3	23
POLR2H	23
PPFIBP1	23
PPP1R16A	23
PPP1R18	23
PRMT2	23
RETREG2	23
RFX3	23
RPL10	23
S100A4	23
SCARB1	23
SEC31B	23
SERINC2	23
SH3YL1	23
SIK1B	23
SKIL	23
SLC27A3	23
SMAD9	23
SNX9	23
SORL1	23
SPNS2	23
STARD9	23
TLE6	23
TRIM2	23
TRIM9	23
TTLL3	23
UBR5	23
WBP2	23
ZBTB10	23
ZBTB20	23
ZER1	23
ABCC1	22
ACTR1B	22
ADPRHL2	22
AGPAT5	22
AMPD2	22
ATP1B1	22
ATP2B1	22
AZI2	22
BIRC2	22
BMP1	22
CAVIN3	22
CD59	22
CDA	22
CHPF	22
COPA	22
COX20	22
DDX50	22
DHRS13	22
DNAH11	22
DNMBP	22
ECE1	22
EFCAB3	22
EGR1	22
EIF2AK3	22
EPOP	22
ERMP1	22
FAM57A	22
FNIP1	22
FSCN1	22
GDI1	22
GOLGA5	22
GPR160	22
HMOX1	22
HRH1	22
HSPA13	22
HTRA1	22
ING1	22
JARID2	22
KCMF1	22
KDM2B	22
LARP6	22
LIF	22
LIMS2	22
LINC00963	22
LZTFL1	22
MAP1B	22
MED15	22
MIB2	22
MIR34AHG	22
MST1	22
NFKB2	22
NFKBIA	22
NFKBIL1	22
OGT	22
PALM	22
PAN2	22
PAQR5	22
PTPRR	22
RAP2B	22
RBFOX2	22
RND3	22
RNF181	22
SEC24D	22
SETD5	22
SGSM2	22
SLC26A6	22
SLC35E2A	22
SNTB1	22
SREBF2	22
TCF7L1	22
THAP8	22
TPM2	22
TTC17	22
UBC	22
UNC119	22
UNC5B	22
ZBTB38	22
ZNF277	22
ZNF358	22
ZNF770	22
ADARB1	21
ALCAM	21
ATRX	21
AXL	21
BCAR1	21
BRI3	21
BSG	21
C11orf68	21
CAMK1D	21
CCNG1	21
CD44	21
CD55	21
CDON	21
CEBPB	21
CEP350	21
CGGBP1	21
CHD3	21
CKB	21
CLDN7	21
CLEC2B	21
COL4A2	21
CRIM1	21
CYTH2	21
DAAM1	21
DENND3	21
DGKD	21
DNAJB9	21
DYRK1B	21
EIF4H	21
F3	21
FBN1	21
FBXO2	21
GPR161	21
GSE1	21
HLA-L	21
ICAM1	21
KIAA0319L	21
KIAA0355	21
KIAA1191	21
LDLR	21
LEPR	21
LINC00511	21
LINC01116	21
LOC100288175	21
LOC100288203	21
LOC101929705	21
LRRC75A-AS1	21
MEX3B	21
MPP2	21
MTHFD1L	21
MXD4	21
MYH10	21
NBEAL1	21
NEDD9	21
NIM1K	21
NR1D1	21
NR4A1	21
NRBP2	21
NUPR1	21
PABPC1	21
PAIP2	21
PDE4D	21
PDXK	21
PGM2L1	21
PHLDA1	21
PHLDA3	21
PKD1	21
PLD3	21
PLEKHA1	21
PNISR	21
PRKCSH	21
PTPN12	21
PTPRN	21
PTPRS	21
RAPGEF4	21
RASA4B	21
RGL2	21
RNF44	21
RPL13	21
RPL28	21
RPS18	21
RPS27	21
RPS28	21
SAMD8	21
SDC2	21
SERPINH1	21
SH2B2	21
SH3BGRL3	21
SLC12A4	21
SLC17A5	21
SLC9A3-AS1	21
SLC9A7	21
SMG6	21
SNHG5	21
TFRC	21
TGFB1I1	21
TGIF2	21
TMEM65	21
TMOD3	21
TP53INP1	21
TTBK2	21
TTYH3	21
UBE2R2	21
UPK1A-AS1	21
ZBED6	21
ZMYM3	21
ZNF704	21
ZSWIM8	21
ABL2	20
ADAM17	20
ADORA2A	20
AFDN	20
ARHGAP5	20
ATG14	20
ATP2C1	20
BBS2	20
BCL10	20
BRWD1	20
BTAF1	20
CAMK2N1	20
CERCAM	20
CFAP44	20
CLIC4	20
CLIP2	20
CP	20
CREB3L2	20
CYB5R3	20
DARS-AS1	20
DSG2	20
DST	20
EIF3E	20
ELF3	20
FAM110C	20
FAT4	20
FBLN1	20
FOXO4	20
GANAB	20
GEM	20
GRB10	20
HR	20
IFNGR2	20
IGF2BP2	20
IGFBP5	20
IP6K2	20
ITGA2	20
ITM2C	20
JCAD	20
JUP	20
KANK1	20
KANK3	20
KIAA1109	20
KIAA1147	20
KLF11	20
KLHL28	20
KTN1	20
LOC284454	20
LOC440434	20
LPP	20
MAF	20
MCL1	20
MEX3C	20
MGLL	20
MORC3	20
MRPS6	20
MSMO1	20
MTR	20
MYO15B	20
MYO9A	20
NADSYN1	20
NPHP3	20
OLMALINC	20
PAICS	20
PAPSS2	20
PATJ	20
PDCD4	20
PDE2A	20
PDIA5	20
PHF1	20
PLXNB2	20
PNPLA8	20
POGZ	20
PPARA	20
PPDPF	20
PRDX4	20
PREP	20
PRR5L	20
PRRT2	20
PTK6	20
RAB3A	20
RAB40C	20
RNF187	20
RPL18A	20
RPL39	20
SCAPER	20
SEL1L	20
SLC15A4	20
SLC16A1	20
SLC2A13	20
SLC44A1	20
SLC6A10P	20
SPAG9	20
SPSB3	20
STON1	20
TGFB2	20
TMEM189	20
TNFRSF11A	20
TOMM20	20
TP53I11	20
TPP1	20
TPT1-AS1	20
TSPYL2	20
TUBA4A	20
UAP1	20
UHRF2	20
UPRT	20
VASN	20
VMP1	20
VWA1	20
WWC2	20
ZDBF2	20
ZNF217	20
ZNF264	20
ZNF33A	20
ACVR2B	19
ADAM9	19
AGTPBP1	19
AHDC1	19
AK2	19
AKAP9	19
AMOTL2	19
ANXA3	19
ARHGEF10	19
ATF2	19
ATP8B3	19
B4GALNT4	19
BCAT1	19
BCL3	19
BEND5	19
C11orf96	19
CANX	19
CAV2	19
CCDC85C	19
CD24	19
CEP170	19
CNKSR3	19
COL4A1	19
CREG2	19
CSGALNACT1	19
CSPG4	19
CSTB	19
CTSD	19
CTSF	19
CUX1	19
DCP2	19
DOT1L	19
EFHC1	19
EMP1	19
EPAS1	19
ERGIC1	19
EZH1	19
F11R	19
F2RL1	19
FILIP1L	19
FRAS1	19
FSTL1	19
GAA	19
GAB2	19
GAD1	19
GLCE	19
GNA13	19
GOLGA2P10	19
GOLPH3L	19
GRPEL1	19
HDAC3	19
HIST2H2AA4	19
HMBOX1	19
HOOK3	19
IGIP	19
IL13RA1	19
ITGA11	19
ITGB5	19
ITPR2	19
KCTD9	19
KRCC1	19
LAMB1	19
LENG8	19
LMCD1	19
LMLN	19
MAMDC4	19
MAP3K7CL	19
MAP3K9	19
MARF1	19
MARK4	19
METTL26	19
MOAP1	19
MTUS1	19
MYL12A	19
MYO1D	19
NAA80	19
NIPA1	19
NORAD	19
NPAS2	19
NPHP3-ACAD11	19
NUCB1	19
OBSCN	19
OPN3	19
OSBPL10	19
PARP6	19
PCYOX1	19
PHF3	19
PIK3CD	19
PIM3	19
PITPNC1	19
PKD1P6	19
PLS3	19
PPP1CB	19
PRDX2	19
PRKAB2	19
RACK1	19
RBL2	19
RBMS2	19
RHPN2	19
RNF227	19
RPL11	19
RPL26	19
RPL37A	19
RPLP1	19
RPS11	19
RPS15A	19
RPS2	19
RPS24	19
RUNDC1	19
SBF2-AS1	19
SEMA4G	19
SFMBT2	19
SH3BP5	19
SLC38A1	19
SLFN5	19
SMAP2	19
SOX9	19
SUCO	19
SUN2	19
TAGLN2	19
TAOK1	19
TBC1D17	19
TGFA	19
THBS3	19
TMEM107	19
TMSB4X	19
TNKS1BP1	19
TP53BP2	19
TRIM56	19
TSC22D4	19
TULP3	19
UFM1	19
USP28	19
WIPF2	19
WIPI1	19
WWTR1	19
ZNF185	19
ZNF470	19
ZXDB	19
ABCA5	18
ACBD3	18
ACKR3	18
AFF1	18
ARHGEF2	18
ARNTL	18
ARSA	18
ARSD	18
ASNS	18
ASS1	18
ATM	18
ATP7A	18
B3GNT4	18
BCAR3	18
BGN	18
BZW1	18
C1GALT1	18
C1QTNF1	18
CACNA1H	18
CALD1	18
CALU	18
CDCA7L	18
CHD1L	18
CIB1	18
COL18A1	18
CPNE5	18
CTDSPL2	18
CUL4B	18
DDX17	18
DYM	18
EBLN3P	18
EIF4EBP1	18
EPHB3	18
ETS2	18
FGFR1	18
FRMD6	18
FZD7	18
GABARAP	18
GPCPD1	18
GPSM1	18
HCN2	18
HLA-H	18
HMGCS1	18
HS1BP3	18
IARS2	18
ICAM5	18
INAFM2	18
INTS13	18
ITGA3	18
ITPR3	18
KLF12	18
LAMA5	18
LINC01000	18
LMBRD1	18
LMNTD2	18
LNCSRLR	18
LOC100996740	18
LONRF1	18
LOXL1	18
LRRC75A	18
LURAP1L	18
MAP3K8	18
MAST1	18
MBD5	18
MEGF8	18
MLH3	18
MPZL2	18
MT-RNR2	18
MYL6B	18
MYO10	18
NFATC2	18
NIPSNAP2	18
NPC1	18
NPR3	18
NTN4	18
NUP58	18
NXPH4	18
OSER1-DT	18
OST4	18
P3H1	18
PANX1	18
PDXP	18
PELI1	18
PIP5KL1	18
PLA2G6	18
PLP2	18
PMS2CL	18
POLI	18
POLR1D	18
PPAN-P2RY11	18
PRKCD	18
RAB30	18
RAI1	18
RASSF3	18
RBM33	18
RDH11	18
RFX2	18
RPL31	18
RPL32	18
RPL34	18
RPS12	18
RPS6	18
RPS6KA2	18
RPS9	18
RTN2	18
SBF2	18
SCAMP1	18
SCARB2	18
SDCBP2	18
SEC14L2	18
SESN2	18
SH3BP2	18
SHMT2	18
SLC25A23	18
SLC27A1	18
SLC39A13	18
SLC39A14	18
SLC45A1	18
SOD2	18
SOS1	18
SRD5A3	18
ST3GAL1	18
ST3GAL6	18
STEAP3	18
STX7	18
SVIL	18
TAB2	18
TBC1D8	18
TCEA3	18
TCIM	18
THSD4	18
TIMP1	18
TLE2	18
TLE3	18
TM4SF1	18
TMEM94	18
TRIB3	18
TUBB3	18
TUBB6	18
UBA6-AS1	18
UBALD2	18
UBASH3B	18
UCN2	18
VASH1	18
VAT1L	18
WDTC1	18
WEE1	18
WFDC3	18
YIPF2	18
ZC3H11A	18
ZCCHC2	18
ZFP36	18
ZFP36L2	18
ZNF550	18
ZNF862	18
ABHD14B	17
ABHD4	17
ACBD5	17
ADCY6	17
ADGRG6	17
ADORA2B	17
ALDH18A1	17
ANKRD10	17
ANKRD33B	17
APLP2	17
ARHGEF28	17
ARL5B	17
ARPC4-TTLL3	17
ASAP2	17
B2M	17
BAG6	17
BCOR	17
BLCAP	17
BMF	17
BTG2	17
C11orf45	17
C1QTNF6	17
CALCOCO2	17
CALR	17
CAPG	17
CARS	17
CBFA2T2	17
CCDC18-AS1	17
CCDC92	17
CELSR3	17
CFDP1	17
CLSTN3	17
COL1A1	17
COL4A5	17
CPA4	17
CPQ	17
CXXC5	17
DCAF6	17
DNAJC18	17
ECH1	17
EIF3D	17
ELK3	17
EPS15	17
ERO1B	17
ESRG	17
EZR	17
FAM131A	17
FAT1	17
FBXL8	17
FHL1	17
FIBCD1	17
GADD45A	17
GALNS	17
GARS	17
GDPD5	17
GLUL	17
GOLGA2P7	17
GPR157	17
GPRC5C	17
HAGH	17
HELZ2	17
HIST1H1C	17
IFT140	17
IFT81	17
IGF2	17
IGFBP2	17
IGFBP4	17
ING2	17
INTS3	17
IQGAP1	17
IQGAP3	17
IRF7	17
ISM2	17
IVNS1ABP	17
KBTBD2	17
KIAA1958	17
KLC4	17
KLF13	17
KLHL3	17
LAMC1	17
LIMS1	17
LINC01011	17
LINC02246	17
LOC100506178	17
LOC101928841	17
LPCAT2	17
LRP10	17
LRRK1	17
MAGED1	17
MALAT1	17
MAP3K1	17
MBOAT2	17
MEIS3	17
MEX3D	17
MGST3	17
MME	17
MMP2	17
MRPL17	17
MTMR3	17
NACAD	17
NATD1	17
NAV2	17
NCSTN	17
NEDD4	17
NEIL1	17
NOX4	17
NRP1	17
NT5E	17
NYNRIN	17
OSBPL5	17
OSER1	17
OTUD1	17
OXR1	17
PACSIN2	17
PARP3	17
PC	17
PCMTD2	17
PDCD6IP	17
PEAR1	17
PLA2G16	17
PLAG1	17
PLD1	17
PLEKHG5	17
PRKCE	17
PROS1	17
PRRC1	17
PSD3	17
PTK7	17
PTMS	17
RAB33A	17
RABGEF1	17
RAP2A	17
RASSF8	17
RBMS3	17
RNF169	17
RNF213	17
RNF5	17
RPS19	17
RPS8	17
SELENOM	17
SEMA3B	17
SEPT10	17
SERTAD4	17
SETBP1	17
SGIP1	17
SIK2	17
SINHCAF	17
SLC16A6	17
SLC1A4	17
SLC25A6	17
SLC43A3	17
SLC7A1	17
SLU7	17
SMOX	17
SNHG18	17
SNHG7	17
SPTBN1	17
SREBF1	17
STAG2	17
STX16	17
SUMF2	17
SYTL3	17
TADA3	17
TAPBP	17
TBL2	17
TBX3	17
TCEAL9	17
TESK2	17
TGIF1	17
TMEM134	17
TMEM159	17
TMEM43	17
TMEM9	17
TNRC6B	17
TRAF5	17
TRIM8	17
TRIP10	17
TSPAN31	17
TUBG2	17
TUFT1	17
UBE2H	17
UBN2	17
UPK1A	17
UPP1	17
USP37	17
USP9X	17
WHAMMP1	17
WHAMMP3	17
WHRN	17
XBP1	17
YAP1	17
ZBTB21	17
ZFAND3	17
ZNF33B	17
ZNF467	17
ZNF503	17
ABCG1	16
ABLIM1	16
AHSA2P	16
AKAP13	16
ANKRA2	16
AOX1	16
ARHGAP4	16
ARID4B	16
ARRB1	16
AVPI1	16
BAIAP2L1	16
BDKRB2	16
C16orf58	16
C1QL1	16
CBX5	16
CBX7	16
CCDC107	16
CCDC174	16
CCDC47	16
CCL28	16
CCND1	16
CD164	16
CD63	16
CEMIP	16
CHAC1	16
CLEC3B	16
CLIC3	16
COL1A2	16
COX7A2L	16
CRELD1	16
CRTAP	16
CTHRC1	16
CUBN	16
CXADR	16
CXCL8	16
CYB5D1	16
CYB5D2	16
CYTOR	16
DAPK3	16
DBP	16
DENND1A	16
DNASE2	16
DUSP10	16
DUSP4	16
DZIP3	16
ELMSAN1	16
EPB41L3	16
EPHA2	16
ETV5	16
FADS3	16
FAM13A-AS1	16
FAM156B	16
FAM193B	16
FAM43A	16
FAM83G	16
FAM84B	16
FARP1	16
FBLN2	16
FBXL3	16
FEZ2	16
FOXK1	16
FOXL1	16
GABRE	16
GDF6	16
GJA1	16
GOLGA6L9	16
GTPBP2	16
HEG1	16
HERC1	16
HEY1	16
HOOK2	16
HPS3	16
HSPB1	16
IRF9	16
ITGB8	16
ITPRID2	16
JAG1	16
KCNMA1	16
KCTD7	16
KDELR1	16
KDELR2	16
KIAA2026	16
KIF3C	16
KIT	16
KLHL36	16
LAMC2	16
LHFPL2	16
LIMD1	16
LINC00294	16
LINC01588	16
LIX1L	16
LMBRD2	16
LOC102724135	16
LOC150776	16
MACF1	16
MADD	16
MARCKSL1	16
MFAP2	16
MMS19	16
NR2F2-AS1	16
NR4A3	16
NRIP1	16
PAIP2B	16
PAPPA	16
PAQR8	16
PARP16	16
PARP8	16
PATL1	16
PCOLCE	16
PDZD7	16
PER2	16
PHPT1	16
PIH1D1	16
PKD1P3-NPIPA1	16
PLEKHA5	16
PLK3	16
PPARG	16
PPP4R1L	16
PRAG1	16
PRDX5	16
PRTN3	16
PTGIS	16
PTH1R	16
RAB11B	16
RAB13	16
RAB43	16
RABAC1	16
RBM3	16
RBM43	16
RCN3	16
RELB	16
RERE	16
RHBDF1	16
RHOF	16
RHOQ	16
RHOU	16
RIN1	16
RNF113A	16
RNF145	16
RNF165	16
RPL10A	16
RPL15	16
RPL19	16
RPL22	16
RPL29	16
RPL4	16
RPL7A	16
RPLP0	16
RPS21	16
RPS3	16
RRAD	16
RTN4	16
SASH1	16
SATB1	16
SDC3	16
SEC31A	16
SH3BP4	16
SH3GL1	16
SH3PXD2B	16
SIDT2	16
SLC2A1-AS1	16
SLC35E2B	16
SMG1	16
SMTN	16
SMURF2	16
SP100	16
SSBP3	16
ST8SIA6	16
STK24	16
SYF2	16
SYVN1	16
TAGLN	16
TLE1	16
TMED9	16
TMEM184B	16
TMEM39A	16
TMTC2	16
TOB2	16
TRPC1	16
USP32	16
VDAC2	16
WASF1	16
WASL	16
WDFY1	16
WDR13	16
WISP2	16
YBX3	16
YIPF5	16
ZBTB37	16
ZCCHC7	16
ZKSCAN8	16
ZMIZ2	16
ZNF337	16
ZNF385A	16
ZNF558	16
ADAM10	15
ADAM19	15
ADAMTS13	15
ADAMTS9-AS2	15
AFF3	15
AKAP2	15
ANKRD1	15
ANKRD11	15
ANXA1	15
AP1S2	15
APCDD1L	15
ARHGAP32	15
ATG12	15
ATG9B	15
ATP11B	15
ATP6AP1	15
BASP1	15
BAZ2A	15
BCL9L	15
BET1L	15
BMP4	15
BOD1L1	15
BRAF	15
C16orf72	15
C19orf66	15
C1R	15
C2orf81	15
CALHM6	15
CAND1.11	15
CBL	15
CCDC183	15
CD81	15
CDC42EP3	15
CDH2	15
CDKN2D	15
CDYL2	15
CERS1	15
CLN8	15
CNN2	15
CNOT6L	15
COG6	15
CPE	15
CPEB2	15
CPEB4	15
CPNE1	15
CRLF1	15
CTDP1	15
CTIF	15
CTNNAL1	15
CTSS	15
CTTNBP2NL	15
CYBRD1	15
CYGB	15
DAPK2	15
DIXDC1	15
DLL4	15
DNAL4	15
DNER	15
DNTTIP1	15
DTX4	15
EDIL3	15
EFNA5	15
EHBP1L1	15
EPB41L1	15
EPN1	15
ERBIN	15
ETV3	15
EVL	15
EXT1	15
FAM149B1	15
FAM214A	15
FAM84A	15
FLCN	15
FNBP4	15
FOSB	15
FRY	15
FYN	15
FZD8	15
GABARAPL2	15
GCC2	15
GFPT1	15
GLIS3	15
GM2A	15
GNRH1	15
GOLGA7B	15
GOLGA8N	15
GPNMB	15
GPR137B	15
GPRC5B	15
GRB7	15
GSTM3	15
GTF2IP4	15
GXYLT2	15
HDAC11	15
HEIH	15
HINFP	15
HOXA13	15
HSD11B1L	15
ICOSLG	15
ID1	15
IFNAR1	15
IL11	15
ILVBL	15
INHA	15
INPPL1	15
IRF2BPL	15
JAG2	15
JAK3	15
KHDRBS1	15
KIAA1522	15
KIZ	15
KLF9	15
KRBOX4	15
KRT80	15
LASP1	15
LIMS3	15
LINC01004	15
LINC01578	15
LINC02043	15
LOC100996724	15
LOXL4	15
LRRC58	15
LSM11	15
LTA4H	15
LYSMD3	15
MAFB	15
MAN1B1	15
MAN2B1	15
MAPK3	15
MARCH6	15
MBP	15
MCC	15
MEG3	15
MICAL1	15
MICALL2	15
MKLN1	15
MLXIP	15
MPG	15
MTHFR	15
MTSS1	15
MYC	15
MYL9	15
MZT2A	15
NDNF	15
NPTX1	15
NR2F1	15
NR4A2	15
NUDT13	15
NXN	15
PADI2	15
PDE4C	15
PDGFA	15
PDIA4	15
PDIA6	15
PDLIM5	15
PDXDC2P-NPIPB14P	15
PDZD4	15
PELI2	15
PEX11A	15
PHF20	15
PHGDH	15
PHLPP1	15
PI4KAP1	15
PICALM	15
PIM2	15
PKD1P1	15
PKD1P4-NPIPA8	15
PLAC8	15
PLCD1	15
PLEC	15
PLEKHO1	15
PLIN3	15
PLXND1	15
PODXL	15
PORCN	15
PPFIA3	15
PRSS8	15
[truncated: 14,873 more rows]
