# Supplementary material for: Formal Meta-Analysis of Hypoxic Gene Expression Profiles Reveals a Universal Gene Signature
Source: Biomedicines. 2022 Sep 8;10(9):2229. doi: 10.3390/biomedicines10092229 (PMC9496516; doi:10.3390/biomedicines10092229)
Supplement: Supplementary file 1 [file biomedicines-10-02229-s001.zip › S4_StudiesMetadata.csv]

Run	BioProject	BioSample	Experiment	Sample.Name	SRA.Study	source_name	Treatment	GSE_ID	Cell_Line	Cell_type	O2	Hx_time
SRR7528280	PRJNA481380	SAMN09666809	SRX4396610	GSM3273196	SRP154009	induced pluripotent stem cell-derived cardiomyocytes	normoxia	GSE117192	H20682	iPS_cardiomyocytes	10	0
SRR7528281	PRJNA481380	SAMN09666808	SRX4396611	GSM3273197	SRP154009	induced pluripotent stem cell-derived cardiomyocytes	hypoxia	GSE117192	H20682	iPS_cardiomyocytes	1	6
SRR7528284	PRJNA481380	SAMN09666805	SRX4396614	GSM3273200	SRP154009	induced pluripotent stem cell-derived cardiomyocytes	normoxia	GSE117192	H20961	iPS_cardiomyocytes	10	0
SRR7528285	PRJNA481380	SAMN09666804	SRX4396615	GSM3273201	SRP154009	induced pluripotent stem cell-derived cardiomyocytes	hypoxia	GSE117192	H20961	iPS_cardiomyocytes	1	6
SRR7528288	PRJNA481380	SAMN09666801	SRX4396618	GSM3273204	SRP154009	induced pluripotent stem cell-derived cardiomyocytes	normoxia	GSE117192	H21792	iPS_cardiomyocytes	10	0
SRR7528289	PRJNA481380	SAMN09666800	SRX4396619	GSM3273205	SRP154009	induced pluripotent stem cell-derived cardiomyocytes	hypoxia	GSE117192	H21792	iPS_cardiomyocytes	1	6
SRR7528292	PRJNA481380	SAMN09666797	SRX4396622	GSM3273208	SRP154009	induced pluripotent stem cell-derived cardiomyocytes	normoxia	GSE117192	H21792	iPS_cardiomyocytes	10	0
SRR7528293	PRJNA481380	SAMN09666796	SRX4396623	GSM3273209	SRP154009	induced pluripotent stem cell-derived cardiomyocytes	hypoxia	GSE117192	H21792	iPS_cardiomyocytes	1	6
SRR7528296	PRJNA481380	SAMN09666793	SRX4396626	GSM3273212	SRP154009	induced pluripotent stem cell-derived cardiomyocytes	normoxia	GSE117192	H22422	iPS_cardiomyocytes	10	0
SRR7528297	PRJNA481380	SAMN09666792	SRX4396627	GSM3273213	SRP154009	induced pluripotent stem cell-derived cardiomyocytes	hypoxia	GSE117192	H22422	iPS_cardiomyocytes	1	6
SRR7528300	PRJNA481380	SAMN09666789	SRX4396630	GSM3273216	SRP154009	induced pluripotent stem cell-derived cardiomyocytes	normoxia	GSE117192	H24280	iPS_cardiomyocytes	10	0
SRR7528301	PRJNA481380	SAMN09666788	SRX4396631	GSM3273217	SRP154009	induced pluripotent stem cell-derived cardiomyocytes	hypoxia	GSE117192	H24280	iPS_cardiomyocytes	1	6
SRR7528304	PRJNA481380	SAMN09666784	SRX4396634	GSM3273220	SRP154009	induced pluripotent stem cell-derived cardiomyocytes	normoxia	GSE117192	H25237	iPS_cardiomyocytes	10	0
SRR7528305	PRJNA481380	SAMN09666783	SRX4396635	GSM3273221	SRP154009	induced pluripotent stem cell-derived cardiomyocytes	hypoxia	GSE117192	H25237	iPS_cardiomyocytes	1	6
SRR7528308	PRJNA481380	SAMN09666779	SRX4396638	GSM3273224	SRP154009	induced pluripotent stem cell-derived cardiomyocytes	normoxia	GSE117192	H25237	iPS_cardiomyocytes	10	0
SRR7528309	PRJNA481380	SAMN09666777	SRX4396639	GSM3273225	SRP154009	induced pluripotent stem cell-derived cardiomyocytes	hypoxia	GSE117192	H25237	iPS_cardiomyocytes	1	6
SRR7528312	PRJNA481380	SAMN09666843	SRX4396642	GSM3273228	SRP154009	induced pluripotent stem cell-derived cardiomyocytes	normoxia	GSE117192	H28126	iPS_cardiomyocytes	10	0
SRR7528313	PRJNA481380	SAMN09666842	SRX4396643	GSM3273229	SRP154009	induced pluripotent stem cell-derived cardiomyocytes	hypoxia	GSE117192	H28126	iPS_cardiomyocytes	1	6
SRR7528316	PRJNA481380	SAMN09666838	SRX4396646	GSM3273232	SRP154009	induced pluripotent stem cell-derived cardiomyocytes	normoxia	GSE117192	H28815	iPS_cardiomyocytes	10	0
SRR7528317	PRJNA481380	SAMN09666836	SRX4396647	GSM3273233	SRP154009	induced pluripotent stem cell-derived cardiomyocytes	hypoxia	GSE117192	H28815	iPS_cardiomyocytes	1	6
SRR7528320	PRJNA481380	SAMN09666833	SRX4396650	GSM3273236	SRP154009	induced pluripotent stem cell-derived cardiomyocytes	normoxia	GSE117192	H28815	iPS_cardiomyocytes	10	0
SRR7528321	PRJNA481380	SAMN09666832	SRX4396651	GSM3273237	SRP154009	induced pluripotent stem cell-derived cardiomyocytes	hypoxia	GSE117192	H28815	iPS_cardiomyocytes	1	6
SRR1055500	PRJNA232177	SAMN02469253	SRX396400	GSM1295103	SRP034634	HPMEC 0h hypoxia exposure	0 hours	GSE53510	HPMEC	human_pulmonary_microvacular_endothelial_cells	21	0
SRR1055501	PRJNA232177	SAMN02469251	SRX396401	GSM1295104	SRP034634	HPMEC 0h hypoxia exposure	0 hours	GSE53510	HPMEC	human_pulmonary_microvacular_endothelial_cells	21	0
SRR1055502	PRJNA232177	SAMN02469252	SRX396402	GSM1295105	SRP034634	HPMEC 0h hypoxia exposure	0 hours	GSE53510	HPMEC	human_pulmonary_microvacular_endothelial_cells	21	0
SRR1055506	PRJNA232177	SAMN02469254	SRX396406	GSM1295109	SRP034634	HPMEC 24h hypoxia exposure	24 hours	GSE53510	HPMEC	human_pulmonary_microvacular_endothelial_cells	1	24
SRR1055507	PRJNA232177	SAMN02469263	SRX396407	GSM1295110	SRP034634	HPMEC 24h hypoxia exposure	24 hours	GSE53510	HPMEC	human_pulmonary_microvacular_endothelial_cells	1	24
SRR1055508	PRJNA232177	SAMN02469261	SRX396408	GSM1295111	SRP034634	HPMEC 24h hypoxia exposure	24 hours	GSE53510	HPMEC	human_pulmonary_microvacular_endothelial_cells	1	24
SRR1055509	PRJNA232177	SAMN02469257	SRX396409	GSM1295112	SRP034634	HPMEC 48h hypoxia exposure	48 hours	GSE53510	HPMEC	human_pulmonary_microvacular_endothelial_cells	1	48
SRR1055510	PRJNA232177	SAMN02469258	SRX396410	GSM1295113	SRP034634	HPMEC 48h hypoxia exposure	48 hours	GSE53510	HPMEC	human_pulmonary_microvacular_endothelial_cells	1	48
SRR2087725	PRJNA288981	SAMN03840589	SRX1081715	GSM1808860	SRP060370	PTEC	Control	GSE70544	HPTEC_HCK8	proximal_tubular_epithelial_cells	21	12
SRR2087726	PRJNA288981	SAMN03840590	SRX1081716	GSM1808861	SRP060370	PTEC	Control	GSE70544	HPTEC_HCK8	proximal_tubular_epithelial_cells	21	12
SRR2087727	PRJNA288981	SAMN03840591	SRX1081717	GSM1808862	SRP060370	PTEC	Control	GSE70544	HPTEC_HCK8	proximal_tubular_epithelial_cells	21	12
SRR2087728	PRJNA288981	SAMN03840592	SRX1081718	GSM1808863	SRP060370	PTEC	Hypoxia treated	GSE70544	HPTEC_HCK8	proximal_tubular_epithelial_cells	0.1	12
SRR2087729	PRJNA288981	SAMN03840593	SRX1081719	GSM1808864	SRP060370	PTEC	Hypoxia treated	GSE70544	HPTEC_HCK8	proximal_tubular_epithelial_cells	0.1	12
SRR2087730	PRJNA288981	SAMN03840594	SRX1081720	GSM1808865	SRP060370	PTEC	Hypoxia treated	GSE70544	HPTEC_HCK8	proximal_tubular_epithelial_cells	0.1	12
SRR6435405	PRJNA428243	SAMN08285282	SRX3526958	GSM2909989	SRP127823	Homo sapiens_Hypoxia	Hypoxia	GSE108676	D737	iPS_cardiomyocytes	1	24
SRR6435406	PRJNA428243	SAMN08285281	SRX3526959	GSM2909990	SRP127823	Homo sapiens_Normoxia	Normoxia	GSE108676	D737	iPS_cardiomyocytes	21	0
SRR6435407	PRJNA428243	SAMN08285280	SRX3526960	GSM2909991	SRP127823	Homo sapiens_Hypoxia	Hypoxia	GSE108676	D740	iPS_cardiomyocytes	1	24
SRR6435408	PRJNA428243	SAMN08285279	SRX3526961	GSM2909992	SRP127823	Homo sapiens_Normoxia	Normoxia	GSE108676	D740	iPS_cardiomyocytes	21	0
SRR6435409	PRJNA428243	SAMN08285278	SRX3526962	GSM2909993	SRP127823	Homo sapiens_Hypoxia	Hypoxia	GSE108676	D8	iPS_cardiomyocytes	1	24
SRR6435410	PRJNA428243	SAMN08285277	SRX3526963	GSM2909994	SRP127823	Homo sapiens_Normoxia	Normoxia	GSE108676	D8	iPS_cardiomyocytes	21	0
SRR7968970	PRJNA494832	SAMN10181169	SRX4802365	GSM3417844	SRP163643	kidney proximal tubule cell line	normoxia--	GSE120886	HPTEC_HCK8	proximal_tubular_epithelial_cells	21	0
SRR7968972	PRJNA494832	SAMN10181168	SRX4802366	GSM3417845	SRP163643	kidney proximal tubule cell line	normoxia--	GSE120886	HPTEC_HCK8	proximal_tubular_epithelial_cells	21	0
SRR7968974	PRJNA494832	SAMN10181166	SRX4802367	GSM3417846	SRP163643	kidney proximal tubule cell line	normoxia--	GSE120886	HPTEC_HCK8	proximal_tubular_epithelial_cells	21	0
SRR7968976	PRJNA494832	SAMN10181212	SRX4802368	GSM3417847	SRP163643	kidney proximal tubule cell line	0.5%16 hours	GSE120886	HPTEC_HCK8	proximal_tubular_epithelial_cells	0.5	16
SRR7968978	PRJNA494832	SAMN10181211	SRX4802369	GSM3417848	SRP163643	kidney proximal tubule cell line	0.5%16 hours	GSE120886	HPTEC_HCK8	proximal_tubular_epithelial_cells	0.5	16
SRR7968980	PRJNA494832	SAMN10181210	SRX4802370	GSM3417849	SRP163643	kidney proximal tubule cell line	0.5%16 hours	GSE120886	HPTEC_HCK8	proximal_tubular_epithelial_cells	0.5	16
SRR7968988	PRJNA494832	SAMN10181191	SRX4802377	GSM3417856	SRP163643	hepatocellular cancer cell line	normoxia	GSE120886	HepG2	hepatocellular_cancer_cell_line	21	0
SRR7968989	PRJNA494832	SAMN10181190	SRX4802378	GSM3417857	SRP163643	hepatocellular cancer cell line	normoxia	GSE120886	HepG2	hepatocellular_cancer_cell_line	21	0
SRR7968990	PRJNA494832	SAMN10181189	SRX4802379	GSM3417858	SRP163643	hepatocellular cancer cell line	normoxia	GSE120886	HepG2	hepatocellular_cancer_cell_line	21	0
SRR7968991	PRJNA494832	SAMN10181215	SRX4802380	GSM3417859	SRP163643	hepatocellular cancer cell line	0.5%	GSE120886	HepG2	hepatocellular_cancer_cell_line	0.5	16
SRR7968992	PRJNA494832	SAMN10181213	SRX4802381	GSM3417860	SRP163643	hepatocellular cancer cell line	0.5%	GSE120886	HepG2	hepatocellular_cancer_cell_line	0.5	16
SRR7968993	PRJNA494832	SAMN10181214	SRX4802382	GSM3417861	SRP163643	hepatocellular cancer cell line	0.5%	GSE120886	HepG2	hepatocellular_cancer_cell_line	0.5	16
SRR5019150	PRJNA353515	SAMN06016023	SRX2347188	GSM2390697	SRP093329	Human Umbilical Vein Endothelial Cells	Normoxia	GSE89840	HUVEC	human_umbilical_vein_endothelial_cells	21	0
SRR5019151	PRJNA353515	SAMN06016022	SRX2347189	GSM2390698	SRP093329	Human Umbilical Vein Endothelial Cells	Hypoxia	GSE89840	HUVEC	human_umbilical_vein_endothelial_cells	1	16
SRR5019154	PRJNA353515	SAMN06016019	SRX2347192	GSM2390701	SRP093329	Human Umbilical Vein Endothelial Cells	Normoxia	GSE89840	HUVEC	human_umbilical_vein_endothelial_cells	21	0
SRR5019155	PRJNA353515	SAMN06016018	SRX2347193	GSM2390702	SRP093329	Human Umbilical Vein Endothelial Cells	Hypoxia	GSE89840	HUVEC	human_umbilical_vein_endothelial_cells	1	16
SRR5832313	PRJNA394729	SAMN07357977	SRX3009612	GSM2705510	SRP112583	HCT116_WT_DMSO_normoxia	DMSO-normoxia	GSE101526	HCT116	colorectal_adenocarcinoma_cell_line	21	0
SRR5832314	PRJNA394729	SAMN07357976	SRX3009613	GSM2705511	SRP112583	HCT116_WT_DMSO_normoxia	DMSO-normoxia	GSE101526	HCT116	colorectal_adenocarcinoma_cell_line	21	0
SRR5832315	PRJNA394729	SAMN07357975	SRX3009614	GSM2705512	SRP112583	HCT116_WT_DMSO_hypoxia	DMSO-hypoxia (1% O2 24hrs)	GSE101526	HCT116	colorectal_adenocarcinoma_cell_line	1	24
SRR5832316	PRJNA394729	SAMN07357974	SRX3009615	GSM2705513	SRP112583	HCT116_WT_DMSO_hypoxia	DMSO-hypoxia (1% O2 24hrs)	GSE101526	HCT116	colorectal_adenocarcinoma_cell_line	1	24
SRR3129715	PRJNA310001	SAMN04444517	SRX1549899	GSM2048413	SRP068971	Brain	Normoxia	GSE77307	U87-MG	Brain_tumor	21	0
SRR3129716	PRJNA310001	SAMN04444518	SRX1549900	GSM2048414	SRP068971	Brain	Normoxia	GSE77307	U87-MG	Brain_tumor	21	0
SRR3129717	PRJNA310001	SAMN04444519	SRX1549901	GSM2048415	SRP068971	Brain	Normoxia	GSE77307	U87-MG	Brain_tumor	21	0
SRR3129718	PRJNA310001	SAMN04444520	SRX1549902	GSM2048416	SRP068971	Brain	Hypoxia	GSE77307	U87-MG	Brain_tumor	1	24
SRR3129719	PRJNA310001	SAMN04444521	SRX1549903	GSM2048417	SRP068971	Brain	Hypoxia	GSE77307	U87-MG	Brain_tumor	1	24
SRR3129720	PRJNA310001	SAMN04444522	SRX1549904	GSM2048418	SRP068971	Brain	Hypoxia	GSE77307	U87-MG	Brain_tumor	1	24
SRR3129721	PRJNA310001	SAMN04444523	SRX1549905	GSM2048419	SRP068971	Brain	Normoxia	GSE77307	HEB	Brain_control	21	0
SRR3129722	PRJNA310001	SAMN04444524	SRX1549906	GSM2048420	SRP068971	Brain	Normoxia	GSE77307	HEB	Brain_control	21	0
SRR3129723	PRJNA310001	SAMN04444525	SRX1549907	GSM2048421	SRP068971	Brain	Normoxia	GSE77307	HEB	Brain_control	21	0
SRR3129724	PRJNA310001	SAMN04444526	SRX1549908	GSM2048422	SRP068971	Brain	Hypoxia	GSE77307	HEB	Brain_control	1	24
SRR3129725	PRJNA310001	SAMN04444527	SRX1549909	GSM2048423	SRP068971	Brain	Hypoxia	GSE77307	HEB	Brain_control	1	24
SRR3129726	PRJNA310001	SAMN04444528	SRX1549910	GSM2048424	SRP068971	Brain	Hypoxia	GSE77307	HEB	Brain_control	1	24
SRR9283239	PRJNA548550	SAMN12039910	SRX6052944	GSM3882337	SRP201221	melanoma	Normoxia	GSE132624	501mel	melanoma	21	0
SRR9283240	PRJNA548550	SAMN12039909	SRX6052945	GSM3882338	SRP201221	melanoma	Normoxia	GSE132624	501mel	melanoma	21	0
SRR9283241	PRJNA548550	SAMN12039907	SRX6052946	GSM3882339	SRP201221	melanoma	Normoxia	GSE132624	501mel	melanoma	21	0
SRR9283242	PRJNA548550	SAMN12039904	SRX6052947	GSM3882340	SRP201221	melanoma	12h Hypoxia	GSE132624	501mel	melanoma	1	12
SRR9283243	PRJNA548550	SAMN12039902	SRX6052948	GSM3882341	SRP201221	melanoma	12h Hypoxia	GSE132624	501mel	melanoma	1	12
SRR9283244	PRJNA548550	SAMN12039958	SRX6052949	GSM3882342	SRP201221	melanoma	12h Hypoxia	GSE132624	501mel	melanoma	1	12
SRR9283245	PRJNA548550	SAMN12039957	SRX6052950	GSM3882343	SRP201221	melanoma	24h Hypoxia	GSE132624	501mel	melanoma	1	24
SRR9283246	PRJNA548550	SAMN12039954	SRX6052951	GSM3882344	SRP201221	melanoma	24h Hypoxia	GSE132624	501mel	melanoma	1	24
SRR9283247	PRJNA548550	SAMN12039952	SRX6052952	GSM3882345	SRP201221	melanoma	24h Hypoxia	GSE132624	501mel	melanoma	1	24
SRR9283248	PRJNA548550	SAMN12039950	SRX6052953	GSM3882346	SRP201221	melanoma	48h Hypoxia	GSE132624	501mel	melanoma	1	48
SRR9283249	PRJNA548550	SAMN12039948	SRX6052954	GSM3882347	SRP201221	melanoma	48h Hypoxia	GSE132624	501mel	melanoma	1	48
SRR9283250	PRJNA548550	SAMN12039945	SRX6052955	GSM3882348	SRP201221	melanoma	48h Hypoxia	GSE132624	501mel	melanoma	1	48
SRR9283251	PRJNA548550	SAMN12039941	SRX6052956	GSM3882349	SRP201221	melanoma	Normoxia	GSE132624	IGR37	melanoma	21	0
SRR9283252	PRJNA548550	SAMN12039936	SRX6052957	GSM3882350	SRP201221	melanoma	Normoxia	GSE132624	IGR37	melanoma	21	0
SRR9283253	PRJNA548550	SAMN12039935	SRX6052958	GSM3882351	SRP201221	melanoma	Normoxia	GSE132624	IGR37	melanoma	21	0
SRR9283254	PRJNA548550	SAMN12039934	SRX6052959	GSM3882352	SRP201221	melanoma	12h Hypoxia	GSE132624	IGR37	melanoma	1	12
SRR9283255	PRJNA548550	SAMN12039932	SRX6052960	GSM3882353	SRP201221	melanoma	12h Hypoxia	GSE132624	IGR37	melanoma	1	12
SRR9283256	PRJNA548550	SAMN12039931	SRX6052961	GSM3882354	SRP201221	melanoma	12h Hypoxia	GSE132624	IGR37	melanoma	1	12
SRR9283257	PRJNA548550	SAMN12039929	SRX6052962	GSM3882355	SRP201221	melanoma	24h Hypoxia	GSE132624	IGR37	melanoma	1	24
SRR9283258	PRJNA548550	SAMN12039928	SRX6052963	GSM3882356	SRP201221	melanoma	24h Hypoxia	GSE132624	IGR37	melanoma	1	24
SRR9283259	PRJNA548550	SAMN12039781	SRX6052964	GSM3882357	SRP201221	melanoma	24h Hypoxia	GSE132624	IGR37	melanoma	1	24
SRR9283260	PRJNA548550	SAMN12039990	SRX6052965	GSM3882358	SRP201221	melanoma	48h Hypoxia	GSE132624	IGR37	melanoma	1	48
SRR9283261	PRJNA548550	SAMN12039989	SRX6052966	GSM3882359	SRP201221	melanoma	48h Hypoxia	GSE132624	IGR37	melanoma	1	48
SRR9283262	PRJNA548550	SAMN12039985	SRX6052967	GSM3882360	SRP201221	melanoma	48h Hypoxia	GSE132624	IGR37	melanoma	1	48
SRR9283263	PRJNA548550	SAMN12039982	SRX6052968	GSM3882361	SRP201221	melanoma	Normoxia	GSE132624	IGR39	melanoma	21	0
SRR9283264	PRJNA548550	SAMN12039978	SRX6052969	GSM3882362	SRP201221	melanoma	Normoxia	GSE132624	IGR39	melanoma	21	0
SRR9283265	PRJNA548550	SAMN12039977	SRX6052970	GSM3882363	SRP201221	melanoma	Normoxia	GSE132624	IGR39	melanoma	21	0
SRR9283266	PRJNA548550	SAMN12039974	SRX6052971	GSM3882364	SRP201221	melanoma	12h Hypoxia	GSE132624	IGR39	melanoma	1	12
SRR9283267	PRJNA548550	SAMN12039972	SRX6052972	GSM3882365	SRP201221	melanoma	12h Hypoxia	GSE132624	IGR39	melanoma	1	12
SRR9283268	PRJNA548550	SAMN12039971	SRX6052973	GSM3882366	SRP201221	melanoma	12h Hypoxia	GSE132624	IGR39	melanoma	1	12
SRR9283269	PRJNA548550	SAMN12039966	SRX6052974	GSM3882367	SRP201221	melanoma	24h Hypoxia	GSE132624	IGR39	melanoma	1	24
SRR9283270	PRJNA548550	SAMN12039965	SRX6052975	GSM3882368	SRP201221	melanoma	24h Hypoxia	GSE132624	IGR39	melanoma	1	24
SRR9283271	PRJNA548550	SAMN12039964	SRX6052976	GSM3882369	SRP201221	melanoma	24h Hypoxia	GSE132624	IGR39	melanoma	1	24
SRR9283272	PRJNA548550	SAMN12039962	SRX6052977	GSM3882370	SRP201221	melanoma	48h Hypoxia	GSE132624	IGR39	melanoma	1	48
SRR9283274	PRJNA548550	SAMN12039813	SRX6052979	GSM3882372	SRP201221	melanoma	48h Hypoxia	GSE132624	IGR39	melanoma	1	48
SRR9283273	PRJNA548550	SAMN12039960	SRX6052978	GSM3882371	SRP201221	melanoma	48h Hypoxia	GSE132624	IGR39	melanoma	1	48
SRR7945358	PRJNA494075	SAMN10148124	SRX4779523	GSM3408114	SRP162991	HeLa_IOX2	1% Oxygen for 16 hours	GSE120675	HeLa	Cervical_carcinoma_cell_line	1	16
SRR7945359	PRJNA494075	SAMN10148135	SRX4779524	GSM3408115	SRP162991	HeLa_DMSO	DMSO 0.05% for 16 hours	GSE120675	HeLa	Cervical_carcinoma_cell_line	21	0
SRR7945362	PRJNA494075	SAMN10148132	SRX4779527	GSM3408118	SRP162991	HeLa_IOX2	1% Oxygen for 16 hours	GSE120675	HeLa	Cervical_carcinoma_cell_line	1	16
SRR7945363	PRJNA494075	SAMN10148131	SRX4779528	GSM3408119	SRP162991	HeLa_DMSO	DMSO 0.05% for 16 hours	GSE120675	HeLa	Cervical_carcinoma_cell_line	21	0
SRR7945366	PRJNA494075	SAMN10148128	SRX4779531	GSM3408122	SRP162991	HeLa_IOX2	1% Oxygen for 16 hours	GSE120675	HeLa	Cervical_carcinoma_cell_line	1	16
SRR7945355	PRJNA494075	SAMN10148127	SRX4779520	GSM3408111	SRP162991	HeLa_DMSO	DMSO 0.05% for 16 hours	GSE120675	HeLa	Cervical_carcinoma_cell_line	21	0
SRR8860371	PRJNA353498	SAMN06015076	SRX2346466	GSM2390150	SRP093315	Human Umbilical Vein Endothelial Cells	hypoxia	GSE89831	HUVEC	human_umbilical_vein_endothelial_cells	1	8
SRR5018416	PRJNA353498	SAMN06015077	SRX2346465	GSM2390149	SRP093315	Human Umbilical Vein Endothelial Cells	normoxia	GSE89831	HUVEC	human_umbilical_vein_endothelial_cells	21	0
SRR5018423	PRJNA353498	SAMN06015068	SRX2346472	GSM2390156	SRP093315	Human Umbilical Vein Endothelial Cells	hypoxia	GSE89831	HUVEC	human_umbilical_vein_endothelial_cells	1	8
SRR5018428	PRJNA353498	SAMN06015065	SRX2346477	GSM2390161	SRP093315	Human Umbilical Vein Endothelial Cells	normoxia	GSE89831	HUVEC	human_umbilical_vein_endothelial_cells	21	0
SRR5018429	PRJNA353498	SAMN06015063	SRX2346478	GSM2390162	SRP093315	Human Umbilical Vein Endothelial Cells	hypoxia	GSE89831	HUVEC	human_umbilical_vein_endothelial_cells	1	8
SRR8860372	PRJNA353498	SAMN06015073	SRX2346471	GSM2390155	SRP093315	Human Umbilical Vein Endothelial Cells	normoxia	GSE89831	HUVEC	human_umbilical_vein_endothelial_cells	21	0
SRR1999300	PRJNA282396	SAMN03569159	SRX1011329	GSM1667173	SRP057708	HCT116_shNT_normoxia	normoxia	GSE68297	HCT116	colorectal_adenocarcinoma_cell_line	21	0
SRR1999301	PRJNA282396	SAMN03569160	SRX1011330	GSM1667174	SRP057708	HCT116_shNT_normoxia	normoxia	GSE68297	HCT116	colorectal_adenocarcinoma_cell_line	21	0
SRR1999308	PRJNA282396	SAMN03569167	SRX1011337	GSM1667181	SRP057708	HCT116_shNT_hypoxia	24 hrs hypoxia (1% O2)	GSE68297	HCT116	colorectal_adenocarcinoma_cell_line	1	24
SRR1999309	PRJNA282396	SAMN03569168	SRX1011338	GSM1667182	SRP057708	HCT116_shNT_hypoxia	24 hrs hypoxia (1% O2)	GSE68297	HCT116	colorectal_adenocarcinoma_cell_line	1	24
SRR2079885	PRJNA288326	SAMN03798427	SRX1074660	GSM1724092	SRP059925	Human Umbilical Vein Endothelial Cells	hypoxic (0.1-0.2% O2)	GSE70330	HUVEC	human_umbilical_vein_endothelial_cells	0.1	24
SRR2079880	PRJNA288326	SAMN03798422	SRX1074655	GSM1724087	SRP059925	Human Umbilical Vein Endothelial Cells	normoxic	GSE70330	HUVEC	human_umbilical_vein_endothelial_cells	21	0
SRR2079881	PRJNA288326	SAMN03798423	SRX1074656	GSM1724088	SRP059925	Human Umbilical Vein Endothelial Cells	normoxic	GSE70330	HUVEC	human_umbilical_vein_endothelial_cells	21	0
SRR2079883	PRJNA288326	SAMN03798425	SRX1074658	GSM1724090	SRP059925	Human Umbilical Vein Endothelial Cells	hypoxic (0.1-0.2% O2)	GSE70330	HUVEC	human_umbilical_vein_endothelial_cells	0.1	24
SRR2079884	PRJNA288326	SAMN03798426	SRX1074659	GSM1724091	SRP059925	Human Umbilical Vein Endothelial Cells	hypoxic (0.1-0.2% O2)	GSE70330	HUVEC	human_umbilical_vein_endothelial_cells	0.1	24
SRR2079882	PRJNA288326	SAMN03798424	SRX1074657	GSM1724089	SRP059925	Human Umbilical Vein Endothelial Cells	normoxic	GSE70330	HUVEC	human_umbilical_vein_endothelial_cells	21	0
SRR3350923	PRJNA291093	SAMN04625769	SRX1688431	GSM2112490	SRP061651	MCF7 cells	21% oxygen	GSE71401	MCF-7	breast_cancer_cell_line	21	0
SRR3350924	PRJNA291093	SAMN04625770	SRX1688432	GSM2112491	SRP061651	MCF7 cells	0.5% oxygen	GSE71401	MCF-7	breast_cancer_cell_line	0.5	24
SRR3350926	PRJNA291093	SAMN04625772	SRX1688434	GSM2112493	SRP061651	MCF7 cells	0.5% oxygen	GSE71401	MCF-7	breast_cancer_cell_line	0.5	24
SRR3350927	PRJNA291093	SAMN04625773	SRX1688435	GSM2112494	SRP061651	MCF7 cells	21% oxygen	GSE71401	MCF-7	breast_cancer_cell_line	21	0
SRR3350928	PRJNA291093	SAMN04625774	SRX1688436	GSM2112495	SRP061651	MCF7 cells	0.5% oxygen	GSE71401	MCF-7	breast_cancer_cell_line	0.5	24
SRR3350925	PRJNA291093	SAMN04625771	SRX1688433	GSM2112492	SRP061651	MCF7 cells	21% oxygen	GSE71401	MCF-7	breast_cancer_cell_line	21	0
SRR3096873	PRJNA308482	SAMN04395889	SRX1527120	GSM2037123	SRP068307	Human Umbilical Vein Endothelial Cells	Normoxia_24h	GSE76743	HUVEC	human_umbilical_vein_endothelial_cells	21	0
SRR3096877	PRJNA308482	SAMN04395893	SRX1527124	GSM2037127	SRP068307	Human Umbilical Vein Endothelial Cells	Hypoxia_48h	GSE76743	HUVEC	human_umbilical_vein_endothelial_cells	1	48
SRR3096878	PRJNA308482	SAMN04395894	SRX1527125	GSM2037128	SRP068307	Human Umbilical Vein Endothelial Cells	Normoxia_24h	GSE76743	HUVEC	human_umbilical_vein_endothelial_cells	21	0
SRR3096879	PRJNA308482	SAMN04395895	SRX1527126	GSM2037129	SRP068307	Human Umbilical Vein Endothelial Cells	Normoxia_24h	GSE76743	HUVEC	human_umbilical_vein_endothelial_cells	21	0
SRR3096876	PRJNA308482	SAMN04395892	SRX1527123	GSM2037126	SRP068307	Human Umbilical Vein Endothelial Cells	Hypoxia_48h	GSE76743	HUVEC	human_umbilical_vein_endothelial_cells	1	48
SRR3096872	PRJNA308482	SAMN04395888	SRX1527119	GSM2037122	SRP068307	Human Umbilical Vein Endothelial Cells	Normoxia_24h	GSE76743	HUVEC	human_umbilical_vein_endothelial_cells	21	0
SRR3096874	PRJNA308482	SAMN04395890	SRX1527121	GSM2037124	SRP068307	Human Umbilical Vein Endothelial Cells	Hypoxia_24h	GSE76743	HUVEC	human_umbilical_vein_endothelial_cells	1	24
SRR3096875	PRJNA308482	SAMN04395891	SRX1527122	GSM2037125	SRP068307	Human Umbilical Vein Endothelial Cells	Hypoxia_24h	GSE76743	HUVEC	human_umbilical_vein_endothelial_cells	1	24
SRR3535647	PRJNA321835	SAMN05004709	SRX1769921	GSM2155004	SRP075272	Colorectal cancer cells	21% oxygen_0hr	GSE81513	HCT116	colorectal_adenocarcinoma_cell_line	21	0
SRR3535651	PRJNA321835	SAMN05004713	SRX1769922	GSM2155005	SRP075272	Colorectal cancer cells	21% oxygen_0hr	GSE81513	HCT116	colorectal_adenocarcinoma_cell_line	21	0
SRR3535655	PRJNA321835	SAMN05004714	SRX1769923	GSM2155006	SRP075272	Colorectal cancer cells	21% oxygen_0hr	GSE81513	HCT116	colorectal_adenocarcinoma_cell_line	21	0
SRR3535671	PRJNA321835	SAMN05004718	SRX1769927	GSM2155010	SRP075272	Colorectal cancer cells	1% oxygen_2hr	GSE81513	HCT116	colorectal_adenocarcinoma_cell_line	1	2
SRR3535675	PRJNA321835	SAMN05004710	SRX1769928	GSM2155011	SRP075272	Colorectal cancer cells	1% oxygen_2hr	GSE81513	HCT116	colorectal_adenocarcinoma_cell_line	1	2
SRR3535679	PRJNA321835	SAMN05004711	SRX1769930	GSM2155012	SRP075272	Colorectal cancer cells	1% oxygen_2hr	GSE81513	HCT116	colorectal_adenocarcinoma_cell_line	1	2
SRR3535683	PRJNA321835	SAMN05004712	SRX1769931	GSM2155013	SRP075272	Colorectal cancer cells	1% oxygen_24hr	GSE81513	HCT116	colorectal_adenocarcinoma_cell_line	1	24
SRR3535687	PRJNA321835	SAMN05004719	SRX1769932	GSM2155014	SRP075272	Colorectal cancer cells	1% oxygen_24hr	GSE81513	HCT116	colorectal_adenocarcinoma_cell_line	1	24
SRR3535691	PRJNA321835	SAMN05004720	SRX1769933	GSM2155015	SRP075272	Colorectal cancer cells	1% oxygen_24hr	GSE81513	HCT116	colorectal_adenocarcinoma_cell_line	1	24
SRR3945124	PRJNA330964	SAMN05432105	SRX1971108	GSM2249290	SRP079381	human primary pericytes_hypoxia	Hypoxia 1% O2\, 5% CO2 humidified atmosphere	GSE84730	human primary pericytes	human_primary_pericytes	1	24
SRR3945125	PRJNA330964	SAMN05432104	SRX1971109	GSM2249291	SRP079381	human primary pericytes_hypoxia	Hypoxia 1% O2\, 5% CO2 humidified atmosphere	GSE84730	human primary pericytes	human_primary_pericytes	1	24
SRR3945126	PRJNA330964	SAMN05432103	SRX1971110	GSM2249292	SRP079381	human primary pericytes_hypoxia	Hypoxia 1% O2\, 5% CO2 humidified atmosphere	GSE84730	human primary pericytes	human_primary_pericytes	1	24
SRR3945127	PRJNA330964	SAMN05432102	SRX1971111	GSM2249293	SRP079381	human primary pericytes_normaxia	Normoxia 20% O2\, 5% CO2 humidified atmosphere	GSE84730	human primary pericytes	human_primary_pericytes	21	0
SRR3945128	PRJNA330964	SAMN05432101	SRX1971112	GSM2249294	SRP079381	human primary pericytes_normaxia	Normoxia 20% O2\, 5% CO2 humidified atmosphere	GSE84730	human primary pericytes	human_primary_pericytes	21	0
SRR3945129	PRJNA330964	SAMN05432100	SRX1971113	GSM2249295	SRP079381	human primary pericytes_normaxia	Normoxia 20% O2\, 5% CO2 humidified atmosphere	GSE84730	human primary pericytes	human_primary_pericytes	21	0
SRR6068891	PRJNA412005	SAMN07692780	SRX3210860	GSM2791577	SRP118788	Breast Tissue	Hypoxia	GSE104193	MDA-MB-231	breast_cancer_cell_line	0.5	24
SRR6068874	PRJNA412005	SAMN07692806	SRX3210843	GSM2791560	SRP118788	Breast Tissue	Normoxia	GSE104193	MCF10A	breast_cancer_cell_line	21	0
SRR6068875	PRJNA412005	SAMN07692805	SRX3210844	GSM2791561	SRP118788	Breast Tissue	Hypoxia	GSE104193	MCF10A	normal_breast_epithelial_cell_line	0.5	24
SRR6068882	PRJNA412005	SAMN07692798	SRX3210851	GSM2791568	SRP118788	Breast Tissue	Normoxia	GSE104193	MCF10A	normal_breast_epithelial_cell_line	21	0
SRR6068883	PRJNA412005	SAMN07692797	SRX3210852	GSM2791569	SRP118788	Breast Tissue	Hypoxia	GSE104193	MCF10A	normal_breast_epithelial_cell_line	0.5	24
SRR6068890	PRJNA412005	SAMN07692785	SRX3210859	GSM2791576	SRP118788	Breast Tissue	Normoxia	GSE104193	MDA-MB-231	breast_cancer_cell_line	21	0
SRR6068898	PRJNA412005	SAMN07692808	SRX3210867	GSM2791584	SRP118788	Breast Tissue	Normoxia	GSE104193	MDA-MB-231	breast_cancer_cell_line	21	0
SRR6068899	PRJNA412005	SAMN07692807	SRX3210868	GSM2791585	SRP118788	Breast Tissue	Hypoxia	GSE104193	MDA-MB-231	breast_cancer_cell_line	0.5	24
SRR6493917	PRJNA428761	SAMN08321021	SRX3583263	GSM2913943	SRP130942	Breast Tissue	20% O2	GSE108833	MDA-MB-231 cells	breast_cancer_cell_line	21	0
SRR6493918	PRJNA428761	SAMN08321020	SRX3583264	GSM2913944	SRP130942	Breast Tissue	20% O2	GSE108833	MDA-MB-231 cells	breast_cancer_cell_line	21	0
SRR6493923	PRJNA428761	SAMN08321015	SRX3583269	GSM2913949	SRP130942	Breast Tissue	1%O2	GSE108833	MDA-MB-231 cells	breast_cancer_cell_line	1	24
SRR6493924	PRJNA428761	SAMN08321014	SRX3583270	GSM2913950	SRP130942	Breast Tissue	1%O2	GSE108833	MDA-MB-231 cells	breast_cancer_cell_line	1	24
SRR6873825	PRJNA445199	SAMN08770303	SRX3827104	GSM3058365	SRP136263	iPSC-derived cortical spheroids	Control	GSE112137	2242-1	iPS_brain_cortical	21	24
SRR6873827	PRJNA445199	SAMN08770301	SRX3827106	GSM3058367	SRP136263	iPSC-derived cortical spheroids	Control	GSE112137	2242-1	iPS_brain_cortical	21	48
SRR6873831	PRJNA445199	SAMN08770325	SRX3827110	GSM3058371	SRP136263	iPSC-derived cortical spheroids	Hypoxia	GSE112137	2242-1	iPS_brain_cortical	1	24
SRR6873833	PRJNA445199	SAMN08770321	SRX3827112	GSM3058373	SRP136263	iPSC-derived cortical spheroids	Hypoxia	GSE112137	2242-1	iPS_brain_cortical	1	48
SRR6873837	PRJNA445199	SAMN08770305	SRX3827116	GSM3058377	SRP136263	iPSC-derived cortical spheroids	Control	GSE112137	8738-1	iPS_brain_cortical	21	24
SRR6873849	PRJNA445199	SAMN08770312	SRX3827128	GSM3058389	SRP136263	iPSC-derived cortical spheroids	Control	GSE112137	8738-1	iPS_brain_cortical	21	24
SRR6873839	PRJNA445199	SAMN08770309	SRX3827118	GSM3058379	SRP136263	iPSC-derived cortical spheroids	Control	GSE112137	8738-1	iPS_brain_cortical	21	48
SRR6873851	PRJNA445199	SAMN08770300	SRX3827130	GSM3058391	SRP136263	iPSC-derived cortical spheroids	Control	GSE112137	8738-1	iPS_brain_cortical	21	48
SRR6873843	PRJNA445199	SAMN08770310	SRX3827122	GSM3058383	SRP136263	iPSC-derived cortical spheroids	Hypoxia	GSE112137	8738-1	iPS_brain_cortical	1	24
SRR6873855	PRJNA445199	SAMN08770296	SRX3827134	GSM3058395	SRP136263	iPSC-derived cortical spheroids	Hypoxia	GSE112137	8738-1	iPS_brain_cortical	1	24
SRR6873845	PRJNA445199	SAMN08770316	SRX3827124	GSM3058385	SRP136263	iPSC-derived cortical spheroids	Hypoxia	GSE112137	8738-1	iPS_brain_cortical	1	48
SRR6873857	PRJNA445199	SAMN08770294	SRX3827136	GSM3058397	SRP136263	iPSC-derived cortical spheroids	Hypoxia	GSE112137	8738-1	iPS_brain_cortical	1	48
SRR6873861	PRJNA445199	SAMN08770336	SRX3827140	GSM3058401	SRP136263	iPSC-derived cortical spheroids	Control	GSE112137	NIH2788-4	iPS_brain_cortical	21	24
SRR6873863	PRJNA445199	SAMN08770289	SRX3827142	GSM3058403	SRP136263	iPSC-derived cortical spheroids	Control	GSE112137	NIH2788-4	iPS_brain_cortical	21	48
SRR6873867	PRJNA445199	SAMN08770329	SRX3827146	GSM3058407	SRP136263	iPSC-derived cortical spheroids	Hypoxia	GSE112137	NIH2788-4	iPS_brain_cortical	1	24
SRR6873869	PRJNA445199	SAMN08770330	SRX3827148	GSM3058409	SRP136263	iPSC-derived cortical spheroids	Hypoxia	GSE112137	NIH2788-4	iPS_brain_cortical	1	48
SRR7638359	PRJNA484181	SAMN09760533	SRX4501902	GSM3317712	SRP156195	human dental pulp cells	normoxia	GSE118046	dental pulp	dental_pulp	21	4
SRR7638360	PRJNA484181	SAMN09760532	SRX4501903	GSM3317713	SRP156195	human dental pulp cells	normoxia	GSE118046	dental pulp	dental_pulp	21	4
SRR7638361	PRJNA484181	SAMN09760531	SRX4501904	GSM3317714	SRP156195	human dental pulp cells	normoxia	GSE118046	dental pulp	dental_pulp	21	4
SRR7638362	PRJNA484181	SAMN09760530	SRX4501905	GSM3317715	SRP156195	human dental pulp cells	hypoxia	GSE118046	dental pulp	dental_pulp	3	4
SRR7638363	PRJNA484181	SAMN09760529	SRX4501906	GSM3317716	SRP156195	human dental pulp cells	hypoxia	GSE118046	dental pulp	dental_pulp	3	4
SRR7638364	PRJNA484181	SAMN09760528	SRX4501907	GSM3317717	SRP156195	human dental pulp cells	hypoxia	GSE118046	dental pulp	dental_pulp	3	4
SRR7638365	PRJNA484181	SAMN09760527	SRX4501908	GSM3317718	SRP156195	human dental pulp cells	normoxia	GSE118046	dental pulp	dental_pulp	21	48
SRR7638366	PRJNA484181	SAMN09760526	SRX4501909	GSM3317719	SRP156195	human dental pulp cells	normoxia	GSE118046	dental pulp	dental_pulp	21	48
SRR7638367	PRJNA484181	SAMN09760525	SRX4501910	GSM3317720	SRP156195	human dental pulp cells	normoxia	GSE118046	dental pulp	dental_pulp	21	48
SRR7638368	PRJNA484181	SAMN09760524	SRX4501911	GSM3317721	SRP156195	human dental pulp cells	hypoxia	GSE118046	dental pulp	dental_pulp	3	48
SRR7638369	PRJNA484181	SAMN09760523	SRX4501912	GSM3317722	SRP156195	human dental pulp cells	hypoxia	GSE118046	dental pulp	dental_pulp	3	48
SRR7638370	PRJNA484181	SAMN09760534	SRX4501913	GSM3317723	SRP156195	human dental pulp cells	hypoxia	GSE118046	dental pulp	dental_pulp	3	48
SRR9077725	PRJNA543430	SAMN11666309	SRX5852992	GSM3772914	SRP198739	A549 hypoxia	hypoxia	GSE131378	A549 (DSMZ no. ACC-107)	lung_cancer_cell_line	0.5	48
SRR9077727	PRJNA543430	SAMN11666307	SRX5852994	GSM3772916	SRP198739	MCF-7 normoxia	normoxia	GSE131378	MCF-7 (DSMZ no. ACC-115)	breast_cancer_cell_line	21	0
SRR9077728	PRJNA543430	SAMN11666306	SRX5852995	GSM3772917	SRP198739	MCF-7 normoxia	normoxia	GSE131378	MCF-7 (DSMZ no. ACC-115)	breast_cancer_cell_line	21	0
SRR9077730	PRJNA543430	SAMN11666304	SRX5852997	GSM3772919	SRP198739	MCF-7 hypoxia	hypoxia	GSE131378	MCF-7 (DSMZ no. ACC-115)	breast_cancer_cell_line	0.5	48
SRR9077723	PRJNA543430	SAMN11666311	SRX5852990	GSM3772912	SRP198739	A549 normoxia	normoxia	GSE131378	A549 (DSMZ no. ACC-107)	lung_cancer_cell_line	21	0
SRR9077724	PRJNA543430	SAMN11666310	SRX5852991	GSM3772913	SRP198739	A549 normoxia	normoxia	GSE131378	A549 (DSMZ no. ACC-107)	lung_cancer_cell_line	21	0
SRR9077726	PRJNA543430	SAMN11666308	SRX5852993	GSM3772915	SRP198739	A549 hypoxia	hypoxia	GSE131378	A549 (DSMZ no. ACC-107)	lung_cancer_cell_line	0.5	48
SRR9077729	PRJNA543430	SAMN11666305	SRX5852996	GSM3772918	SRP198739	MCF-7 hypoxia	hypoxia	GSE131378	MCF-7 (DSMZ no. ACC-115)	breast_cancer_cell_line	0.5	48
SRR10379822	PRJNA586858	SAMN13169410	SRX7080695	GSM4145782	SRP227820	AsPC-1	Normoxic	GSE139673	AsPC-1	adenocarcinoma_pancreas_cell_line	21	0
SRR10379825	PRJNA586858	SAMN13169409	SRX7080696	GSM4145783	SRP227820	AsPC-1	Normoxic	GSE139673	AsPC-1	adenocarcinoma_pancreas_cell_line	21	0
SRR10379828	PRJNA586858	SAMN13169408	SRX7080697	GSM4145784	SRP227820	AsPC-1	Normoxic	GSE139673	AsPC-1	adenocarcinoma_pancreas_cell_line	21	0
SRR10379840	PRJNA586858	SAMN13169404	SRX7080701	GSM4145788	SRP227820	AsPC-1	Hypoxic	GSE139673	AsPC-1	adenocarcinoma_pancreas_cell_line	1	24
SRR10379843	PRJNA586858	SAMN13169403	SRX7080702	GSM4145789	SRP227820	AsPC-1	Hypoxic	GSE139673	AsPC-1	adenocarcinoma_pancreas_cell_line	1	24
SRR10379846	PRJNA586858	SAMN13169402	SRX7080703	GSM4145790	SRP227820	AsPC-1	Hypoxic	GSE139673	AsPC-1	adenocarcinoma_pancreas_cell_line	1	24
SRR10989435	PRJNA603962	SAMN13944716	SRX7650854	GSM4290114	SRP246093	K562	21%_24hr	GSE144527	K562	myelogenous_leukemia_cell_line	21	24
SRR10989436	PRJNA603962	SAMN13944715	SRX7650855	GSM4290115	SRP246093	K562	21%_24hr	GSE144527	K562	myelogenous_leukemia_cell_line	21	24
SRR10989437	PRJNA603962	SAMN13944714	SRX7650856	GSM4290116	SRP246093	K562	21%_24hr	GSE144527	K562	myelogenous_leukemia_cell_line	21	24
SRR10989459	PRJNA603962	SAMN13944735	SRX7650878	GSM4290138	SRP246093	K562	1%_24hr	GSE144527	K562	myelogenous_leukemia_cell_line	1	24
SRR10989460	PRJNA603962	SAMN13944734	SRX7650879	GSM4290139	SRP246093	K562	1%_24hr	GSE144527	K562	myelogenous_leukemia_cell_line	1	24
SRR10989461	PRJNA603962	SAMN13944733	SRX7650880	GSM4290140	SRP246093	K562	1%_24hr	GSE144527	K562	myelogenous_leukemia_cell_line	1	24
SRR9915688	PRJNA559082	SAMN12513067	SRX6664986	GSM4012588	SRP217671	Neuroblastoma Patient Derived Orthotopic Xenograft cells	hypoxia	GSE135487	Neuroblastoma Patient Derived Orthotopic Xenograft cells	Neuroblastoma_Patient_Derived_Orthotopic_Xenograft_cells	0.1	24
SRR9915690	PRJNA559082	SAMN12513065	SRX6664988	GSM4012590	SRP217671	Neuroblastoma Patient Derived Orthotopic Xenograft cells	normoxia	GSE135487	Neuroblastoma Patient Derived Orthotopic Xenograft cells	Neuroblastoma_Patient_Derived_Orthotopic_Xenograft_cells	21	0
SRR9915692	PRJNA559082	SAMN12513063	SRX6664990	GSM4012592	SRP217671	Neuroblastoma Patient Derived Orthotopic Xenograft cells	normoxia	GSE135487	Neuroblastoma Patient Derived Orthotopic Xenograft cells	Neuroblastoma_Patient_Derived_Orthotopic_Xenograft_cells	21	0
SRR9915694	PRJNA559082	SAMN12513061	SRX6664992	GSM4012594	SRP217671	Neuroblastoma Patient Derived Orthotopic Xenograft cells	hypoxia	GSE135487	Neuroblastoma Patient Derived Orthotopic Xenograft cells	Neuroblastoma_Patient_Derived_Orthotopic_Xenograft_cells	0.1	24
SRR9915696	PRJNA559082	SAMN12513059	SRX6664994	GSM4012596	SRP217671	Neuroblastoma Patient Derived Orthotopic Xenograft cells	normoxia	GSE135487	Neuroblastoma Patient Derived Orthotopic Xenograft cells	Neuroblastoma_Patient_Derived_Orthotopic_Xenograft_cells	21	0
SRR9915698	PRJNA559082	SAMN12513081	SRX6664996	GSM4012598	SRP217671	Neuroblastoma Patient Derived Orthotopic Xenograft cells	hypoxia	GSE135487	Neuroblastoma Patient Derived Orthotopic Xenograft cells	Neuroblastoma_Patient_Derived_Orthotopic_Xenograft_cells	0.1	24
SRR11906306	PRJNA636612	SAMN15080986	SRX8452895	GSM4586574	SRP265560	retinal epithelial cells	normoxia	GSE151610	ARPE-19	retinal_epithelial_cells	21	0
SRR11906318	PRJNA636612	SAMN15080973	SRX8452907	GSM4586586	SRP265560	retinal epithelial cells	hypoxia	GSE151610	ARPE-19	retinal_epithelial_cells	0.5	4
SRR11906322	PRJNA636612	SAMN15080989	SRX8452911	GSM4586590	SRP265560	retinal epithelial cells	normoxia	GSE151610	ARPE-19	retinal_epithelial_cells	21	0
SRR11906302	PRJNA636612	SAMN15080968	SRX8452891	GSM4586570	SRP265560	retinal epithelial cells	hypoxia	GSE151610	ARPE-19	retinal_epithelial_cells	0.5	4
SRR11906310	PRJNA636612	SAMN15080982	SRX8452899	GSM4586578	SRP265560	retinal epithelial cells	hypoxia	GSE151610	ARPE-19	retinal_epithelial_cells	0.5	4
SRR11906314	PRJNA636612	SAMN15080978	SRX8452903	GSM4586582	SRP265560	retinal epithelial cells	normoxia	GSE151610	ARPE-19	retinal_epithelial_cells	21	0
SRR11149193	PRJNA608195	SAMN14167484	SRX7785273	GSM4332577	SRP250432	Human Umbilical Vein Endothelial Cells	normoxia	GSE145774	HUVEC	human_umbilical_vein_endothelial_cells	NA	0
SRR11149195	PRJNA608195	SAMN14167482	SRX7785308	GSM4332579	SRP250432	Human Umbilical Vein Endothelial Cells	hypoxia	GSE145774	HUVEC	human_umbilical_vein_endothelial_cells	1	24
SRR11149198	PRJNA608195	SAMN14167447	SRX7785311	GSM4332582	SRP250432	Human Umbilical Vein Endothelial Cells	normoxia	GSE145774	HUVEC	human_umbilical_vein_endothelial_cells	21	0
SRR11149203	PRJNA608195	SAMN14167479	SRX7785316	GSM4332587	SRP250432	Human Umbilical Vein Endothelial Cells	normoxia	GSE145774	HUVEC	human_umbilical_vein_endothelial_cells	21	0
SRR11149205	PRJNA608195	SAMN14167477	SRX7785318	GSM4332589	SRP250432	Human Umbilical Vein Endothelial Cells	hypoxia	GSE145774	HUVEC	human_umbilical_vein_endothelial_cells	1	24
SRR11149208	PRJNA608195	SAMN14167547	SRX7785321	GSM4332592	SRP250432	Human Umbilical Vein Endothelial Cells	normoxia	GSE145774	HUVEC	human_umbilical_vein_endothelial_cells	21	0
SRR11149210	PRJNA608195	SAMN14167545	SRX7785323	GSM4332594	SRP250432	Human Umbilical Vein Endothelial Cells	hypoxia	GSE145774	HUVEC	human_umbilical_vein_endothelial_cells	1	24
SRR11149213	PRJNA608195	SAMN14167542	SRX7785326	GSM4332597	SRP250432	Human Umbilical Vein Endothelial Cells	normoxia	GSE145774	HUVEC	human_umbilical_vein_endothelial_cells	21	0
SRR11149215	PRJNA608195	SAMN14167540	SRX7785328	GSM4332599	SRP250432	Human Umbilical Vein Endothelial Cells	hypoxia	GSE145774	HUVEC	human_umbilical_vein_endothelial_cells	1	24
SRR11149218	PRJNA608195	SAMN14167537	SRX7785274	GSM4332602	SRP250432	Human Umbilical Vein Endothelial Cells	normoxia	GSE145774	HUVEC	human_umbilical_vein_endothelial_cells	21	0
SRR11149220	PRJNA608195	SAMN14167535	SRX7785276	GSM4332604	SRP250432	Human Umbilical Vein Endothelial Cells	hypoxia	GSE145774	HUVEC	human_umbilical_vein_endothelial_cells	1	24
SRR11149223	PRJNA608195	SAMN14167532	SRX7785279	GSM4332607	SRP250432	Human Umbilical Vein Endothelial Cells	normoxia	GSE145774	HUVEC	human_umbilical_vein_endothelial_cells	21	0
SRR11149228	PRJNA608195	SAMN14167527	SRX7785284	GSM4332612	SRP250432	Human Umbilical Vein Endothelial Cells	normoxia	GSE145774	HUVEC	human_umbilical_vein_endothelial_cells	21	0
SRR11149230	PRJNA608195	SAMN14167525	SRX7785286	GSM4332614	SRP250432	Human Umbilical Vein Endothelial Cells	hypoxia	GSE145774	HUVEC	human_umbilical_vein_endothelial_cells	1	24
SRR11149233	PRJNA608195	SAMN14167522	SRX7785289	GSM4332617	SRP250432	Human Umbilical Vein Endothelial Cells	normoxia	GSE145774	HUVEC	human_umbilical_vein_endothelial_cells	21	0
SRR11149235	PRJNA608195	SAMN14167520	SRX7785291	GSM4332619	SRP250432	Human Umbilical Vein Endothelial Cells	hypoxia	GSE145774	HUVEC	human_umbilical_vein_endothelial_cells	1	24
SRR11149240	PRJNA608195	SAMN14167515	SRX7785296	GSM4332624	SRP250432	Human Umbilical Vein Endothelial Cells	hypoxia	GSE145774	HUVEC	human_umbilical_vein_endothelial_cells	1	24
SRR11149200	PRJNA608195	SAMN14167445	SRX7785313	GSM4332584	SRP250432	Human Umbilical Vein Endothelial Cells	hypoxia	GSE145774	HUVEC	human_umbilical_vein_endothelial_cells	1	24
SRR11149225	PRJNA608195	SAMN14167530	SRX7785281	GSM4332609	SRP250432	Human Umbilical Vein Endothelial Cells	hypoxia	GSE145774	HUVEC	human_umbilical_vein_endothelial_cells	1	24
SRR11149238	PRJNA608195	SAMN14167517	SRX7785294	GSM4332622	SRP250432	Human Umbilical Vein Endothelial Cells	normoxia	GSE145774	HUVEC	human_umbilical_vein_endothelial_cells	21	0
SRR11149193	PRJNA608195	SAMN14167484	SRX7785273	GSM4332577	SRP250432	Human Umbilical Vein Endothelial Cells	normoxia	GSE145774	HUVEC	human_umbilical_vein_endothelial_cells	21	0
SRR11149194	PRJNA608195	SAMN14167483	SRX7785307	GSM4332578	SRP250432	Human Umbilical Vein Endothelial Cells	hypoxia	GSE145774	HUVEC	human_umbilical_vein_endothelial_cells	1	6
SRR11149198	PRJNA608195	SAMN14167447	SRX7785311	GSM4332582	SRP250432	Human Umbilical Vein Endothelial Cells	normoxia	GSE145774	HUVEC	human_umbilical_vein_endothelial_cells	21	0
SRR11149203	PRJNA608195	SAMN14167479	SRX7785316	GSM4332587	SRP250432	Human Umbilical Vein Endothelial Cells	normoxia	GSE145774	HUVEC	human_umbilical_vein_endothelial_cells	21	0
SRR11149204	PRJNA608195	SAMN14167478	SRX7785317	GSM4332588	SRP250432	Human Umbilical Vein Endothelial Cells	hypoxia	GSE145774	HUVEC	human_umbilical_vein_endothelial_cells	1	6
SRR11149208	PRJNA608195	SAMN14167547	SRX7785321	GSM4332592	SRP250432	Human Umbilical Vein Endothelial Cells	normoxia	GSE145774	HUVEC	human_umbilical_vein_endothelial_cells	21	0
SRR11149209	PRJNA608195	SAMN14167546	SRX7785322	GSM4332593	SRP250432	Human Umbilical Vein Endothelial Cells	hypoxia	GSE145774	HUVEC	human_umbilical_vein_endothelial_cells	1	6
SRR11149213	PRJNA608195	SAMN14167542	SRX7785326	GSM4332597	SRP250432	Human Umbilical Vein Endothelial Cells	normoxia	GSE145774	HUVEC	human_umbilical_vein_endothelial_cells	21	0
SRR11149214	PRJNA608195	SAMN14167541	SRX7785327	GSM4332598	SRP250432	Human Umbilical Vein Endothelial Cells	hypoxia	GSE145774	HUVEC	human_umbilical_vein_endothelial_cells	1	6
SRR11149218	PRJNA608195	SAMN14167537	SRX7785274	GSM4332602	SRP250432	Human Umbilical Vein Endothelial Cells	normoxia	GSE145774	HUVEC	human_umbilical_vein_endothelial_cells	21	0
SRR11149219	PRJNA608195	SAMN14167536	SRX7785275	GSM4332603	SRP250432	Human Umbilical Vein Endothelial Cells	hypoxia	GSE145774	HUVEC	human_umbilical_vein_endothelial_cells	1	6
SRR11149223	PRJNA608195	SAMN14167532	SRX7785279	GSM4332607	SRP250432	Human Umbilical Vein Endothelial Cells	normoxia	GSE145774	HUVEC	human_umbilical_vein_endothelial_cells	21	0
SRR11149224	PRJNA608195	SAMN14167531	SRX7785280	GSM4332608	SRP250432	Human Umbilical Vein Endothelial Cells	hypoxia	GSE145774	HUVEC	human_umbilical_vein_endothelial_cells	1	6
SRR11149228	PRJNA608195	SAMN14167527	SRX7785284	GSM4332612	SRP250432	Human Umbilical Vein Endothelial Cells	normoxia	GSE145774	HUVEC	human_umbilical_vein_endothelial_cells	21	0
SRR11149229	PRJNA608195	SAMN14167526	SRX7785285	GSM4332613	SRP250432	Human Umbilical Vein Endothelial Cells	hypoxia	GSE145774	HUVEC	human_umbilical_vein_endothelial_cells	1	6
SRR11149233	PRJNA608195	SAMN14167522	SRX7785289	GSM4332617	SRP250432	Human Umbilical Vein Endothelial Cells	normoxia	GSE145774	HUVEC	human_umbilical_vein_endothelial_cells	21	0
SRR11149234	PRJNA608195	SAMN14167521	SRX7785290	GSM4332618	SRP250432	Human Umbilical Vein Endothelial Cells	hypoxia	GSE145774	HUVEC	human_umbilical_vein_endothelial_cells	1	6
SRR11149239	PRJNA608195	SAMN14167516	SRX7785295	GSM4332623	SRP250432	Human Umbilical Vein Endothelial Cells	hypoxia	GSE145774	HUVEC	human_umbilical_vein_endothelial_cells	1	6
SRR11149199	PRJNA608195	SAMN14167446	SRX7785312	GSM4332583	SRP250432	Human Umbilical Vein Endothelial Cells	hypoxia	GSE145774	HUVEC	human_umbilical_vein_endothelial_cells	1	6
SRR11149238	PRJNA608195	SAMN14167517	SRX7785294	GSM4332622	SRP250432	Human Umbilical Vein Endothelial Cells	normoxia	GSE145774	HUVEC	human_umbilical_vein_endothelial_cells	21	0
SRR12558751	PRJNA660478	SAMN15950576	SRX9047223	GSM4759540	SRP279502	Pulmonary Artery	hypoxia	GSE157231	Endothelial Cell	Pulmonary_Artery_cells	0.5	24
SRR12558752	PRJNA660478	SAMN15950575	SRX9047224	GSM4759541	SRP279502	Pulmonary Artery	hypoxia	GSE157231	Endothelial Cell	Pulmonary_Artery_cells	0.5	24
SRR12558753	PRJNA660478	SAMN15950574	SRX9047225	GSM4759542	SRP279502	Pulmonary Artery	hypoxia	GSE157231	Endothelial Cell	Pulmonary_Artery_cells	0.5	24
SRR12558754	PRJNA660478	SAMN15950573	SRX9047226	GSM4759543	SRP279502	Pulmonary Artery	hypoxia	GSE157231	Endothelial Cell	Pulmonary_Artery_cells	0.5	24
SRR12558755	PRJNA660478	SAMN15950572	SRX9047227	GSM4759544	SRP279502	Pulmonary Artery	6h Hypoxia	GSE157231	Endothelial Cell	Pulmonary_Artery_cells	0.5	6
SRR12558756	PRJNA660478	SAMN15950571	SRX9047228	GSM4759545	SRP279502	Pulmonary Artery	6h Hypoxia	GSE157231	Endothelial Cell	Pulmonary_Artery_cells	0.5	6
SRR12558757	PRJNA660478	SAMN15950570	SRX9047229	GSM4759546	SRP279502	Pulmonary Artery	6h Hypoxia	GSE157231	Endothelial Cell	Pulmonary_Artery_cells	0.5	6
SRR12558758	PRJNA660478	SAMN15950569	SRX9047230	GSM4759547	SRP279502	Pulmonary Artery	6h Hypoxia	GSE157231	Endothelial Cell	Pulmonary_Artery_cells	0.5	6
SRR12558759	PRJNA660478	SAMN15950592	SRX9047231	GSM4759548	SRP279502	Pulmonary Artery	normoxia	GSE157231	Endothelial Cell	Pulmonary_Artery_cells	21	0
SRR12558760	PRJNA660478	SAMN15950591	SRX9047232	GSM4759549	SRP279502	Pulmonary Artery	Normoxia	GSE157231	Endothelial Cell	Pulmonary_Artery_cells	21	0
SRR12558761	PRJNA660478	SAMN15950590	SRX9047233	GSM4759550	SRP279502	Pulmonary Artery	normoxia	GSE157231	Endothelial Cell	Pulmonary_Artery_cells	21	0
SRR12558762	PRJNA660478	SAMN15950589	SRX9047234	GSM4759551	SRP279502	Pulmonary Artery	Normoxia	GSE157231	Endothelial Cell	Pulmonary_Artery_cells	21	0
SRR13302589	PRJNA687693	SAMN17152446	SRX9731503	GSM4988021	SRP299271	Human brain microvascular endothelal cells	Normoxia	GSE163827	Human brain microvascular endothelal cells	Human_brain_microvascular_endothelal_cells	21	0
SRR13302593	PRJNA687693	SAMN17152445	SRX9731504	GSM4988022	SRP299271	Human brain microvascular endothelal cells	Normoxia	GSE163827	Human brain microvascular endothelal cells	Human_brain_microvascular_endothelal_cells	21	0
SRR13302597	PRJNA687693	SAMN17152444	SRX9731505	GSM4988023	SRP299271	Human brain microvascular endothelal cells	Normoxia	GSE163827	Human brain microvascular endothelal cells	Human_brain_microvascular_endothelal_cells	21	0
SRR13302601	PRJNA687693	SAMN17152443	SRX9731506	GSM4988024	SRP299271	Human brain microvascular endothelal cells	Hypoxia	GSE163827	Human brain microvascular endothelal cells	Human_brain_microvascular_endothelal_cells	0.2	24
SRR13302605	PRJNA687693	SAMN17152442	SRX9731507	GSM4988025	SRP299271	Human brain microvascular endothelal cells	Hypoxia	GSE163827	Human brain microvascular endothelal cells	Human_brain_microvascular_endothelal_cells	0.2	24
SRR13302609	PRJNA687693	SAMN17152441	SRX9731508	GSM4988026	SRP299271	Human brain microvascular endothelal cells	Hypoxia	GSE163827	Human brain microvascular endothelal cells	Human_brain_microvascular_endothelal_cells	0.2	24
SRR13302565	PRJNA687693	SAMN17152434	SRX9731497	GSM4988015	SRP299271	Human pulmonary artery endothelial cells	Normoxia	GSE163827	Human pulmonary artery endothelial cells	Human_pulmonary_artery_endothelial_cells	21	0
SRR13302569	PRJNA687693	SAMN17152433	SRX9731498	GSM4988016	SRP299271	Human pulmonary artery endothelial cells	Normoxia	GSE163827	Human pulmonary artery endothelial cells	Human_pulmonary_artery_endothelial_cells	21	0
SRR13302573	PRJNA687693	SAMN17152432	SRX9731499	GSM4988017	SRP299271	Human pulmonary artery endothelial cells	Normoxia	GSE163827	Human pulmonary artery endothelial cells	Human_pulmonary_artery_endothelial_cells	21	0
SRR13302577	PRJNA687693	SAMN17152431	SRX9731500	GSM4988018	SRP299271	Human pulmonary artery endothelial cells	Hypoxia	GSE163827	Human pulmonary artery endothelial cells	Human_pulmonary_artery_endothelial_cells	0.2	24
SRR13302581	PRJNA687693	SAMN17152448	SRX9731501	GSM4988019	SRP299271	Human pulmonary artery endothelial cells	Hypoxia	GSE163827	Human pulmonary artery endothelial cells	Human_pulmonary_artery_endothelial_cells	0.2	24
SRR13302585	PRJNA687693	SAMN17152447	SRX9731502	GSM4988020	SRP299271	Human pulmonary artery endothelial cells	Hypoxia	GSE163827	Human pulmonary artery endothelial cells	Human_pulmonary_artery_endothelial_cells	0.2	24
SRR1959049	PRJNA257780	SAMN03468197	SRX984340	GSM1654556	SRP045355	human umbilical vein endothelial cells	Hypoxia	GSE60217	umbilical vein endothelial cells	human_umbilical_vein_endothelial_cells	1	24
SRR1959050	PRJNA257780	SAMN03468198	SRX984341	GSM1654559	SRP045355	human umbilical vein endothelial cells	Hypoxia	GSE60217	umbilical vein endothelial cells	human_umbilical_vein_endothelial_cells	1	24
SRR1959051	PRJNA257780	SAMN03468199	SRX984342	GSM1654561	SRP045355	human umbilical vein endothelial cells	Normoxia	GSE60217	umbilical vein endothelial cells	human_umbilical_vein_endothelial_cells	21	0
SRR1959052	PRJNA257780	SAMN03468200	SRX984343	GSM1654563	SRP045355	human umbilical vein endothelial cells	Normoxia	GSE60217	umbilical vein endothelial cells	human_umbilical_vein_endothelial_cells	21	0
SRR6371758	PRJNA422221	SAMN08167514	SRX3467081	GSM2886834	SRP126639	primary cell line-Brain tumor	hypoxia	GSE108013	primary cell line-Brain tumor	Brain_tumor_primary_cell_line	3	24
SRR6371759	PRJNA422221	SAMN08167513	SRX3467082	GSM2886835	SRP126639	primary cell line-Brain tumor	hypoxia	GSE108013	primary cell line-Brain tumor	Brain_tumor_primary_cell_line	3	24
SRR6371760	PRJNA422221	SAMN08167512	SRX3467083	GSM2886836	SRP126639	primary cell line-Brain tumor	hypoxia	GSE108013	primary cell line-Brain tumor	Brain_tumor_primary_cell_line	3	24
SRR6371761	PRJNA422221	SAMN08167511	SRX3467084	GSM2886837	SRP126639	primary cell line-Brain tumor	normoxia	GSE108013	primary cell line-Brain tumor	Brain_tumor_primary_cell_line	21	0
SRR6371762	PRJNA422221	SAMN08167510	SRX3467085	GSM2886838	SRP126639	primary cell line-Brain tumor	normoxia	GSE108013	primary cell line-Brain tumor	Brain_tumor_primary_cell_line	21	0
SRR6371763	PRJNA422221	SAMN08167509	SRX3467086	GSM2886839	SRP126639	primary cell line-Brain tumor	normoxia	GSE108013	primary cell line-Brain tumor	Brain_tumor_primary_cell_line	21	0
SRR9077711	PRJNA543429	SAMN11666303	SRX5852978	GSM3772920	SRP198737	Cervical_carcinoma_cell_line	normoxia	GSE131379	HeLa	Cervical_carcinoma_cell_line	21	0
SRR9077712	PRJNA543429	SAMN11666302	SRX5852979	GSM3772921	SRP198737	Cervical_carcinoma_cell_line	normoxia	GSE131379	HeLa	Cervical_carcinoma_cell_line	21	0
SRR9077713	PRJNA543429	SAMN11666301	SRX5852980	GSM3772922	SRP198737	Cervical_carcinoma_cell_line	normoxia	GSE131379	HeLa	Cervical_carcinoma_cell_line	21	0
SRR9077714	PRJNA543429	SAMN11666300	SRX5852981	GSM3772923	SRP198737	Cervical_carcinoma_cell_line	hypoxia	GSE131379	HeLa	Cervical_carcinoma_cell_line	0.2	24
SRR9077715	PRJNA543429	SAMN11666299	SRX5852982	GSM3772924	SRP198737	Cervical_carcinoma_cell_line	hypoxia	GSE131379	HeLa	Cervical_carcinoma_cell_line	0.2	24
SRR11067864	PRJNA606047	SAMN14083844	SRX7708145	GSM4306640	SRP248226	RKO cells	normoxia	GSE145108	RKO	colon_carcinoma_cell_line	21	0
SRR11067865	PRJNA606047	SAMN14083843	SRX7708146	GSM4306641	SRP248226	RKO cells	hypoxia (1% O2 24hrs)	GSE145108	RKO	colon_carcinoma_cell_line	1	24
SRR11067867	PRJNA606047	SAMN14083841	SRX7708148	GSM4306643	SRP248226	RKO cells	hypoxia (1% O2 24hrs)	GSE145108	RKO	colon_carcinoma_cell_line	1	24
SRR11067866	PRJNA606047	SAMN14083842	SRX7708147	GSM4306642	SRP248226	RKO cells	normoxia	GSE145108	RKO	colon_carcinoma_cell_line	21	0
SRR11067868	PRJNA606047	SAMN14083839	SRX7708149	GSM4306644	SRP248226	A549 cells	normoxia	GSE145108	A549	lung_adenocarcinoma_cell_line	21	0
SRR11067869	PRJNA606047	SAMN14083838	SRX7708150	GSM4306645	SRP248226	A549 cells	hypoxia (1% O2 24hrs)	GSE145108	A549	lung_adenocarcinoma_cell_line	1	24
SRR11067870	PRJNA606047	SAMN14083837	SRX7708151	GSM4306646	SRP248226	A549 cells	normoxia	GSE145108	A549	lung_adenocarcinoma_cell_line	21	0
SRR11067871	PRJNA606047	SAMN14083836	SRX7708152	GSM4306647	SRP248226	A549 cells	hypoxia (1% O2 24hrs)	GSE145108	A549	lung_adenocarcinoma_cell_line	1	24
SRR11067872	PRJNA606047	SAMN14083835	SRX7708153	GSM4306648	SRP248226	H460 cells	normoxia	GSE145108	H460	lung_large_cell_carcinoma	21	0
SRR11067873	PRJNA606047	SAMN14083834	SRX7708154	GSM4306649	SRP248226	H460 cells	hypoxia (1% O2 24hrs)	GSE145108	H460	lung_large_cell_carcinoma	1	24
SRR11067874	PRJNA606047	SAMN14083833	SRX7708155	GSM4306650	SRP248226	H460 cells	normoxia	GSE145108	H460	lung_large_cell_carcinoma	21	0
SRR11067875	PRJNA606047	SAMN14083831	SRX7708156	GSM4306651	SRP248226	H460 cells	hypoxia (1% O2 24hrs)	GSE145108	H460	lung_large_cell_carcinoma	1	24
SRR10380504	PRJNA586868	SAMN13170632	SRX7081348	GSM4145955	SRP227843	Human umbilical vein endothelial cell	hypoxia	GSE139678	Human umbilical vein endothelial cell	human_umbilical_vein_endothelial_cells	1	8
SRR10380507	PRJNA586868	SAMN13170631	SRX7081351	GSM4145958	SRP227843	Human umbilical vein endothelial cell	hypoxia	GSE139678	Human umbilical vein endothelial cell	human_umbilical_vein_endothelial_cells	21	0
SRR10380501	PRJNA586868	SAMN13170635	SRX7081345	GSM4145952	SRP227843	Human umbilical vein endothelial cell	normoxia	GSE139678	Human umbilical vein endothelial cell	human_umbilical_vein_endothelial_cells	21	0
SRR10380510	PRJNA586868	SAMN13170628	SRX7081354	GSM4145961	SRP227843	Human umbilical vein endothelial cell	normoxia	GSE139678	Human umbilical vein endothelial cell	human_umbilical_vein_endothelial_cells	1	8
SRR12094720	PRJNA641930	SAMN15373830	SRX8620582	GSM4639878	SRP268861	breast cancer cell line	normoxia: 21% O2	GSE153291	MCF-7	breast_cancer_cell_line	21	24
SRR12094721	PRJNA641930	SAMN15373829	SRX8620583	GSM4639879	SRP268861	breast cancer cell line	normoxia: 21% O2	GSE153291	MCF-7	breast_cancer_cell_line	21	24
SRR12094722	PRJNA641930	SAMN15373828	SRX8620584	GSM4639880	SRP268861	breast cancer cell line	normoxia: 21% O2	GSE153291	MCF-7	breast_cancer_cell_line	21	24
SRR12094723	PRJNA641930	SAMN15373831	SRX8620585	GSM4639881	SRP268861	breast cancer cell line	hypoxia: 1% O2	GSE153291	MCF-7	breast_cancer_cell_line	1	24
SRR12094724	PRJNA641930	SAMN15373827	SRX8620586	GSM4639882	SRP268861	breast cancer cell line	hypoxia: 1% O2	GSE153291	MCF-7	breast_cancer_cell_line	1	24
SRR12094725	PRJNA641930	SAMN15373826	SRX8620587	GSM4639883	SRP268861	breast cancer cell line	hypoxia: 1% O2	GSE153291	MCF-7	breast_cancer_cell_line	1	24
SRR7179536	PRJNA416257	SAMN09221626	SRX4096743	GSM3145517	SRP122890	prostate cancer	Normoxia	GSE106305	PC3	prostate_cancer_cell_line	21	0
SRR7179537	PRJNA416257	SAMN09221625	SRX4096744	GSM3145518	SRP122890	prostate cancer	Normoxia	GSE106305	PC3	prostate_cancer_cell_line	21	0
SRR7179540	PRJNA416257	SAMN09221622	SRX4096747	GSM3145521	SRP122890	prostate cancer	Hypoxia	GSE106305	PC3	prostate_cancer_cell_line	0.2	24
SRR7179541	PRJNA416257	SAMN09221621	SRX4096748	GSM3145522	SRP122890	prostate cancer	Hypoxia	GSE106305	PC3	prostate_cancer_cell_line	0.2	24
SRR7179504	PRJNA416257	SAMN09221634	SRX4096735	GSM3145509	SRP122890	prostate cancer	Empty_Vector_Normoxia	GSE106305	LNCaP	prostate_cancer_cell_line	21	0
SRR7179508	PRJNA416257	SAMN09221633	SRX4096736	GSM3145510	SRP122890	prostate cancer	Empty_Vector_Normoxia	GSE106305	LNCaP	prostate_cancer_cell_line	21	0
SRR7179520	PRJNA416257	SAMN09221630	SRX4096739	GSM3145513	SRP122890	prostate cancer	Empty_Vector_Hypoxia	GSE106305	LNCaP	prostate_cancer_cell_line	0.2	24
SRR7179524	PRJNA416257	SAMN09221629	SRX4096740	GSM3145514	SRP122890	prostate cancer	Empty_Vector_Hypoxia	GSE106305	LNCaP	prostate_cancer_cell_line	0.2	24
SRR6300668	PRJNA418883	SAMN08035737	SRX3401582	GSM2859867	SRP125237	Human umbilical vein endothelial cells	Hypoxia	GSE107029	Human umbilical vein endothelial cell	human_umbilical_vein_endothelial_cells	0.2	12
SRR6300671	PRJNA418883	SAMN08035734	SRX3401585	GSM2859870	SRP125237	Human umbilical vein endothelial cells	Normoxia	GSE107029	Human umbilical vein endothelial cell	human_umbilical_vein_endothelial_cells	21	12
SRR6300672	PRJNA418883	SAMN08035733	SRX3401586	GSM2859871	SRP125237	Human umbilical vein endothelial cells	Normoxia	GSE107029	Human umbilical vein endothelial cell	human_umbilical_vein_endothelial_cells	21	12
SRR6300667	PRJNA418883	SAMN08035738	SRX3401581	GSM2859866	SRP125237	Human umbilical vein endothelial cells	Hypoxia	GSE107029	Human umbilical vein endothelial cell	human_umbilical_vein_endothelial_cells	0.2	12
SRR6300669	PRJNA418883	SAMN08035736	SRX3401583	GSM2859868	SRP125237	Human umbilical vein endothelial cells	Hypoxia	GSE107029	Human umbilical vein endothelial cell	human_umbilical_vein_endothelial_cells	0.2	24
SRR6300670	PRJNA418883	SAMN08035735	SRX3401584	GSM2859869	SRP125237	Human umbilical vein endothelial cells	Hypoxia	GSE107029	Human umbilical vein endothelial cell	human_umbilical_vein_endothelial_cells	0.2	24
SRR6300673	PRJNA418883	SAMN08035732	SRX3401587	GSM2859872	SRP125237	Human umbilical vein endothelial cells	Normoxia	GSE107029	Human umbilical vein endothelial cell	human_umbilical_vein_endothelial_cells	21	24
SRR6300674	PRJNA418883	SAMN08035731	SRX3401588	GSM2859873	SRP125237	Human umbilical vein endothelial cells	Normoxia	GSE107029	Human umbilical vein endothelial cell	human_umbilical_vein_endothelial_cells	21	24
SRR3175541	PRJNA312377	SAMN04504459	SRX1589961	GSM2064645	SRP070447	non-neoplastic brain cell	control	GSE78025	HEB cell line,non-neoplastic brain cell	non-neoplastic_brain_cell_line	21	0
SRR3175542	PRJNA312377	SAMN04504460	SRX1589962	GSM2064646	SRP070447	non-neoplastic brain cell	control	GSE78025	HEB cell line,non-neoplastic brain cell	non-neoplastic_brain_cell_line	21	0
SRR3175543	PRJNA312377	SAMN04504461	SRX1589963	GSM2064647	SRP070447	non-neoplastic brain cell	control	GSE78025	HEB cell line,non-neoplastic brain cell	non-neoplastic_brain_cell_line	21	0
SRR3175544	PRJNA312377	SAMN04504462	SRX1589964	GSM2064648	SRP070447	non-neoplastic brain cell	control+1%hypoxia	GSE78025	HEB cell line,non-neoplastic brain cell	non-neoplastic_brain_cell_line	1	24
SRR3175545	PRJNA312377	SAMN04504463	SRX1589965	GSM2064649	SRP070447	non-neoplastic brain cell	control+1%hypoxia	GSE78025	HEB cell line,non-neoplastic brain cell	non-neoplastic_brain_cell_line	1	24
SRR3175546	PRJNA312377	SAMN04504464	SRX1589966	GSM2064650	SRP070447	non-neoplastic brain cell	control+1%hypoxia	GSE78025	HEB cell line,non-neoplastic brain cell	non-neoplastic_brain_cell_line	1	24
SRR3175547	PRJNA312377	SAMN04504465	SRX1589967	GSM2064651	SRP070447	non-neoplastic brain cell	control+5%hypoxia	GSE78025	HEB cell line,non-neoplastic brain cell	non-neoplastic_brain_cell_line	5	24
SRR3175548	PRJNA312377	SAMN04504466	SRX1589968	GSM2064652	SRP070447	non-neoplastic brain cell	control+5%hypoxia	GSE78025	HEB cell line,non-neoplastic brain cell	non-neoplastic_brain_cell_line	5	24
SRR3175549	PRJNA312377	SAMN04504467	SRX1589969	GSM2064653	SRP070447	non-neoplastic brain cell	control+5%hypoxia	GSE78025	HEB cell line,non-neoplastic brain cell	non-neoplastic_brain_cell_line	5	24
SRR3175550	PRJNA312377	SAMN04504468	SRX1589970	GSM2064654	SRP070447	Glioblastoma (GBM)	tumor	GSE78025	U87-MG cell line,Glioblastoma (GBM)	Brain_tumor	21	0
SRR3175551	PRJNA312377	SAMN04504469	SRX1589971	GSM2064655	SRP070447	Glioblastoma (GBM)	tumor	GSE78025	U87-MG cell line,Glioblastoma (GBM)	Brain_tumor	21	0
SRR3175552	PRJNA312377	SAMN04504470	SRX1589972	GSM2064656	SRP070447	Glioblastoma (GBM)	tumor	GSE78025	U87-MG cell line,Glioblastoma (GBM)	Brain_tumor	21	0
SRR3175553	PRJNA312377	SAMN04504471	SRX1589973	GSM2064657	SRP070447	Glioblastoma (GBM)	tumor+1%hypoxia	GSE78025	U87-MG cell line,Glioblastoma (GBM)	Brain_tumor	1	24
SRR3175554	PRJNA312377	SAMN04504472	SRX1589974	GSM2064658	SRP070447	Glioblastoma (GBM)	tumor+1%hypoxia	GSE78025	U87-MG cell line,Glioblastoma (GBM)	Brain_tumor	1	24
SRR3175555	PRJNA312377	SAMN04504473	SRX1589975	GSM2064659	SRP070447	Glioblastoma (GBM)	tumor+1%hypoxia	GSE78025	U87-MG cell line,Glioblastoma (GBM)	Brain_tumor	1	24
SRR3175556	PRJNA312377	SAMN04504474	SRX1589976	GSM2064660	SRP070447	Glioblastoma (GBM)	tumor+5%hypoxia	GSE78025	U87-MG cell line,Glioblastoma (GBM)	Brain_tumor	5	24
SRR3175557	PRJNA312377	SAMN04504475	SRX1589977	GSM2064661	SRP070447	Glioblastoma (GBM)	tumor+5%hypoxia	GSE78025	U87-MG cell line,Glioblastoma (GBM)	Brain_tumor	5	24
SRR3175558	PRJNA312377	SAMN04504476	SRX1589978	GSM2064662	SRP070447	Glioblastoma (GBM)	tumor+5%hypoxia	GSE78025	U87-MG cell line,Glioblastoma (GBM)	Brain_tumor	5	24
SRR8318475	PRJNA510072	SAMN10593674	SRX5131098	GSM3514415	SRP173455	UFH-001 Triple Negative Breast Cancer Cells	Normoxia	GSE123856	UFH-001	Triple_Negative_Breast_Cancer_Cells	21	0
SRR8318476	PRJNA510072	SAMN10593673	SRX5131099	GSM3514416	SRP173455	UFH-001 Triple Negative Breast Cancer Cells	Hypoxia	GSE123856	UFH-001	Triple_Negative_Breast_Cancer_Cells	1	16
SRR8318477	PRJNA510072	SAMN10593672	SRX5131100	GSM3514417	SRP173455	UFH-001 Triple Negative Breast Cancer Cells	Normoxia	GSE123856	UFH-001	Triple_Negative_Breast_Cancer_Cells	21	0
SRR8318478	PRJNA510072	SAMN10593671	SRX5131101	GSM3514418	SRP173455	UFH-001 Triple Negative Breast Cancer Cells	Hypoxia	GSE123856	UFH-001	Triple_Negative_Breast_Cancer_Cells	1	16
SRR8318479	PRJNA510072	SAMN10593670	SRX5131102	GSM3514419	SRP173455	UFH-001 Triple Negative Breast Cancer Cells	Normoxia	GSE123856	UFH-001	Triple_Negative_Breast_Cancer_Cells	21	0
SRR8318480	PRJNA510072	SAMN10593669	SRX5131103	GSM3514420	SRP173455	UFH-001 Triple Negative Breast Cancer Cells	Hypoxia	GSE123856	UFH-001	Triple_Negative_Breast_Cancer_Cells	1	16
SRR7692107	PRJNA485958	SAMN09831800	SRX4551654	GSM3332060	SRP157907	Human umbilical vein endothelial cells	normoxia	GSE118530	Human umbilical vein endothelial cell (HUVEC)	human_umbilical_vein_endothelial_cells	21	0
SRR7692109	PRJNA485958	SAMN09831799	SRX4551655	GSM3332061	SRP157907	Human umbilical vein endothelial cells	hypoxia	GSE118530	Human umbilical vein endothelial cell (HUVEC)	human_umbilical_vein_endothelial_cells	1	6
SRR7692111	PRJNA485958	SAMN09831798	SRX4551656	GSM3332062	SRP157907	Human umbilical vein endothelial cells	normoxia	GSE118530	Human umbilical vein endothelial cell (HUVEC)	human_umbilical_vein_endothelial_cells	21	0
SRR7692113	PRJNA485958	SAMN09831797	SRX4551657	GSM3332063	SRP157907	Human umbilical vein endothelial cells	hypoxia	GSE118530	Human umbilical vein endothelial cell (HUVEC)	human_umbilical_vein_endothelial_cells	1	6
SRR11589478	PRJNA627436	SAMN14669704	SRX8156832	GSM4490856	SRP257927	Breast cancer	Normoxia	GSE149132	T47D	breast_cancer_cell_line	21	0
SRR11589479	PRJNA627436	SAMN14669760	SRX8156833	GSM4490857	SRP257927	Breast cancer	Normoxia	GSE149132	T47D	breast_cancer_cell_line	21	0
SRR11589480	PRJNA627436	SAMN14669755	SRX8156834	GSM4490858	SRP257927	Breast cancer	Normoxia	GSE149132	T47D	breast_cancer_cell_line	21	0
SRR11589481	PRJNA627436	SAMN14669752	SRX8156835	GSM4490859	SRP257927	Breast cancer	Hypoxia	GSE149132	T47D	breast_cancer_cell_line	0.5	48
SRR11589482	PRJNA627436	SAMN14669748	SRX8156836	GSM4490860	SRP257927	Breast cancer	Hypoxia	GSE149132	T47D	breast cancer cells	0.5	48
SRR11589483	PRJNA627436	SAMN14669743	SRX8156837	GSM4490861	SRP257927	Breast cancer	Hypoxia	GSE149132	T47D	breast cancer cells	0.5	48
SRR10982507	PRJNA603596	SAMN13938522	SRX7644925	GSM4287987	SRP245676	iPSC-derived cardiomyocytes	normoxia	GSE144424	induced pluripotent stem cell-derived cardiomyocytes	iPS_cardiomyocytes	10	6
SRR10982508	PRJNA603596	SAMN13938521	SRX7644926	GSM4287988	SRP245676	iPSC-derived cardiomyocytes	hypoxia	GSE144424	induced pluripotent stem cell-derived cardiomyocytes	iPS_cardiomyocytes	1	6
SRR10982511	PRJNA603596	SAMN13938544	SRX7644929	GSM4287991	SRP245676	iPSC-derived cardiomyocytes	normoxia	GSE144424	induced pluripotent stem cell-derived cardiomyocytes	iPS_cardiomyocytes	10	6
SRR10982512	PRJNA603596	SAMN13938543	SRX7644930	GSM4287992	SRP245676	iPSC-derived cardiomyocytes	hypoxia	GSE144424	induced pluripotent stem cell-derived cardiomyocytes	iPS_cardiomyocytes	1	6
SRR10982515	PRJNA603596	SAMN13938597	SRX7644933	GSM4287995	SRP245676	iPSC-derived cardiomyocytes	normoxia	GSE144424	induced pluripotent stem cell-derived cardiomyocytes	iPS_cardiomyocytes	10	6
SRR10982516	PRJNA603596	SAMN13938596	SRX7644934	GSM4287996	SRP245676	iPSC-derived cardiomyocytes	hypoxia	GSE144424	induced pluripotent stem cell-derived cardiomyocytes	iPS_cardiomyocytes	1	6
SRR10982519	PRJNA603596	SAMN13938593	SRX7644937	GSM4287999	SRP245676	iPSC-derived cardiomyocytes	normoxia	GSE144424	induced pluripotent stem cell-derived cardiomyocytes	iPS_cardiomyocytes	10	6
SRR10982520	PRJNA603596	SAMN13938592	SRX7644938	GSM4288000	SRP245676	iPSC-derived cardiomyocytes	hypoxia	GSE144424	induced pluripotent stem cell-derived cardiomyocytes	iPS_cardiomyocytes	1	6
SRR10982523	PRJNA603596	SAMN13938589	SRX7644941	GSM4288003	SRP245676	iPSC-derived cardiomyocytes	normoxia	GSE144424	induced pluripotent stem cell-derived cardiomyocytes	iPS_cardiomyocytes	10	6
SRR10982524	PRJNA603596	SAMN13938588	SRX7644942	GSM4288004	SRP245676	iPSC-derived cardiomyocytes	hypoxia	GSE144424	induced pluripotent stem cell-derived cardiomyocytes	iPS_cardiomyocytes	1	6
SRR10982527	PRJNA603596	SAMN13938585	SRX7644945	GSM4288007	SRP245676	iPSC-derived cardiomyocytes	normoxia	GSE144424	induced pluripotent stem cell-derived cardiomyocytes	iPS_cardiomyocytes	10	6
SRR10982528	PRJNA603596	SAMN13938584	SRX7644946	GSM4288008	SRP245676	iPSC-derived cardiomyocytes	hypoxia	GSE144424	induced pluripotent stem cell-derived cardiomyocytes	iPS_cardiomyocytes	1	6
SRR10982531	PRJNA603596	SAMN13938581	SRX7644961	GSM4288011	SRP245676	iPSC-derived cardiomyocytes	normoxia	GSE144424	induced pluripotent stem cell-derived cardiomyocytes	iPS_cardiomyocytes	10	6
SRR10982532	PRJNA603596	SAMN13938580	SRX7644962	GSM4288012	SRP245676	iPSC-derived cardiomyocytes	hypoxia	GSE144424	induced pluripotent stem cell-derived cardiomyocytes	iPS_cardiomyocytes	1	6
SRR10982535	PRJNA603596	SAMN13938577	SRX7644965	GSM4288015	SRP245676	iPSC-derived cardiomyocytes	normoxia	GSE144424	induced pluripotent stem cell-derived cardiomyocytes	iPS_cardiomyocytes	10	6
SRR10982536	PRJNA603596	SAMN13938576	SRX7644966	GSM4288016	SRP245676	iPSC-derived cardiomyocytes	hypoxia	GSE144424	induced pluripotent stem cell-derived cardiomyocytes	iPS_cardiomyocytes	1	6
SRR10982539	PRJNA603596	SAMN13938570	SRX7644969	GSM4288019	SRP245676	iPSC-derived cardiomyocytes	normoxia	GSE144424	induced pluripotent stem cell-derived cardiomyocytes	iPS_cardiomyocytes	10	6
SRR10982540	PRJNA603596	SAMN13938569	SRX7644970	GSM4288020	SRP245676	iPSC-derived cardiomyocytes	hypoxia	GSE144424	induced pluripotent stem cell-derived cardiomyocytes	iPS_cardiomyocytes	1	6
SRR10982543	PRJNA603596	SAMN13938573	SRX7644973	GSM4288023	SRP245676	iPSC-derived cardiomyocytes	normoxia	GSE144424	induced pluripotent stem cell-derived cardiomyocytes	iPS_cardiomyocytes	10	6
SRR10982544	PRJNA603596	SAMN13938625	SRX7644974	GSM4288024	SRP245676	iPSC-derived cardiomyocytes	hypoxia	GSE144424	induced pluripotent stem cell-derived cardiomyocytes	iPS_cardiomyocytes	1	6
SRR10982547	PRJNA603596	SAMN13938622	SRX7644977	GSM4288027	SRP245676	iPSC-derived cardiomyocytes	normoxia	GSE144424	induced pluripotent stem cell-derived cardiomyocytes	iPS_cardiomyocytes	10	6
SRR10982548	PRJNA603596	SAMN13938621	SRX7644978	GSM4288028	SRP245676	iPSC-derived cardiomyocytes	hypoxia	GSE144424	induced pluripotent stem cell-derived cardiomyocytes	iPS_cardiomyocytes	1	6
SRR10982551	PRJNA603596	SAMN13938618	SRX7644981	GSM4288031	SRP245676	iPSC-derived cardiomyocytes	normoxia	GSE144424	induced pluripotent stem cell-derived cardiomyocytes	iPS_cardiomyocytes	10	6
SRR10982552	PRJNA603596	SAMN13938617	SRX7644982	GSM4288032	SRP245676	iPSC-derived cardiomyocytes	hypoxia	GSE144424	induced pluripotent stem cell-derived cardiomyocytes	iPS_cardiomyocytes	1	6
SRR10982555	PRJNA603596	SAMN13938614	SRX7644985	GSM4288035	SRP245676	iPSC-derived cardiomyocytes	normoxia	GSE144424	induced pluripotent stem cell-derived cardiomyocytes	iPS_cardiomyocytes	10	6
SRR10982556	PRJNA603596	SAMN13938613	SRX7644986	GSM4288036	SRP245676	iPSC-derived cardiomyocytes	hypoxia	GSE144424	induced pluripotent stem cell-derived cardiomyocytes	iPS_cardiomyocytes	1	6
SRR10982559	PRJNA603596	SAMN13938610	SRX7644989	GSM4288039	SRP245676	iPSC-derived cardiomyocytes	normoxia	GSE144424	induced pluripotent stem cell-derived cardiomyocytes	iPS_cardiomyocytes	10	6
SRR10982560	PRJNA603596	SAMN13938609	SRX7644990	GSM4288040	SRP245676	iPSC-derived cardiomyocytes	hypoxia	GSE144424	induced pluripotent stem cell-derived cardiomyocytes	iPS_cardiomyocytes	1	6
SRR10982563	PRJNA603596	SAMN13938606	SRX7644993	GSM4288043	SRP245676	iPSC-derived cardiomyocytes	normoxia	GSE144424	induced pluripotent stem cell-derived cardiomyocytes	iPS_cardiomyocytes	10	6
SRR10982564	PRJNA603596	SAMN13938605	SRX7644994	GSM4288044	SRP245676	iPSC-derived cardiomyocytes	hypoxia	GSE144424	induced pluripotent stem cell-derived cardiomyocytes	iPS_cardiomyocytes	1	6
SRR10982567	PRJNA603596	SAMN13938600	SRX7644997	GSM4288047	SRP245676	iPSC-derived cardiomyocytes	normoxia	GSE144424	induced pluripotent stem cell-derived cardiomyocytes	iPS_cardiomyocytes	10	6
SRR10982568	PRJNA603596	SAMN13938599	SRX7644998	GSM4288048	SRP245676	iPSC-derived cardiomyocytes	hypoxia	GSE144424	induced pluripotent stem cell-derived cardiomyocytes	iPS_cardiomyocytes	1	6
SRR10982571	PRJNA603596	SAMN13938604	SRX7645001	GSM4288051	SRP245676	iPSC-derived cardiomyocytes	normoxia	GSE144424	induced pluripotent stem cell-derived cardiomyocytes	iPS_cardiomyocytes	10	6
SRR10982572	PRJNA603596	SAMN13938603	SRX7645002	GSM4288052	SRP245676	iPSC-derived cardiomyocytes	hypoxia	GSE144424	induced pluripotent stem cell-derived cardiomyocytes	iPS_cardiomyocytes	1	6
SRR10982575	PRJNA603596	SAMN13938508	SRX7645005	GSM4288055	SRP245676	iPSC-derived cardiomyocytes	normoxia	GSE144424	induced pluripotent stem cell-derived cardiomyocytes	iPS_cardiomyocytes	10	6
SRR10982576	PRJNA603596	SAMN13938507	SRX7645006	GSM4288056	SRP245676	iPSC-derived cardiomyocytes	hypoxia	GSE144424	induced pluripotent stem cell-derived cardiomyocytes	iPS_cardiomyocytes	1	6
SRR10982579	PRJNA603596	SAMN13938502	SRX7644949	GSM4288059	SRP245676	iPSC-derived cardiomyocytes	normoxia	GSE144424	induced pluripotent stem cell-derived cardiomyocytes	iPS_cardiomyocytes	10	6
SRR10982580	PRJNA603596	SAMN13938500	SRX7644950	GSM4288060	SRP245676	iPSC-derived cardiomyocytes	hypoxia	GSE144424	induced pluripotent stem cell-derived cardiomyocytes	iPS_cardiomyocytes	1	6
SRR10982583	PRJNA603596	SAMN13938496	SRX7644953	GSM4288063	SRP245676	iPSC-derived cardiomyocytes	normoxia	GSE144424	induced pluripotent stem cell-derived cardiomyocytes	iPS_cardiomyocytes	10	6
SRR10982584	PRJNA603596	SAMN13938494	SRX7644954	GSM4288064	SRP245676	iPSC-derived cardiomyocytes	hypoxia	GSE144424	induced pluripotent stem cell-derived cardiomyocytes	iPS_cardiomyocytes	1	6
SRR10982587	PRJNA603596	SAMN13938488	SRX7644957	GSM4288067	SRP245676	iPSC-derived cardiomyocytes	normoxia	GSE144424	induced pluripotent stem cell-derived cardiomyocytes	iPS_cardiomyocytes	10	6
SRR10982588	PRJNA603596	SAMN13938487	SRX7644958	GSM4288068	SRP245676	iPSC-derived cardiomyocytes	hypoxia	GSE144424	induced pluripotent stem cell-derived cardiomyocytes	iPS_cardiomyocytes	1	6
SRR1686012	PRJNA268942	SAMN03246987	SRX790918	GSM1556298	SRP050374	decidual stromal cells	normoxia	GSE111570	CRL-4003	in vitro decidualized endometrial stromal fibroblast (ATCC: CRL-4003) grown in culture	21	24
SRR1686013	PRJNA268942	SAMN03246985	SRX790919	GSM1556299	SRP050374	decidual stromal cells	normoxia	GSE111570	CRL-4003	in vitro decidualized endometrial stromal fibroblast (ATCC: CRL-4003) grown in culture	21	24
SRR6819120	PRJNA437464	SAMN08663092	SRX3776011	GSM3034451	SRP134192	decidual stromal cells	hypoxia	GSE111570	CRL-4003	in vitro decidualized endometrial stromal fibroblast (ATCC: CRL-4003) grown in culture	1	24
SRR6819132	PRJNA437464	SAMN08663091	SRX3776012	GSM3034452	SRP134192	decidual stromal cells	hypoxia	GSE111570	CRL-4003	in vitro decidualized endometrial stromal fibroblast (ATCC: CRL-4003) grown in culture	1	24
