# Supplementary material for: Formal Meta-Analysis of Hypoxic Gene Expression Profiles Reveals a Universal Gene Signature
Source: Biomedicines. 2022 Sep 8;10(9):2229. doi: 10.3390/biomedicines10092229 (PMC9496516; doi:10.3390/biomedicines10092229)
Supplement: Supplementary file 1 [file biomedicines-10-02229-s001.zip › S5_MetaAnRes.csv]

Gene_Symbol	N	Beta	SE	tval	df	pval	ci.lb	ci.ub	adjP
A4GALT	58	0.292916803917873	0.0962213991770757	3.04419605641797	57	0.00352697279012843	0.100236775621127	0.485596832214619	0.0121899829278013
AAAS	68	-0.243271619113447	0.0488210912414197	-4.98292055600461	67	4.66957897688082e-06	-0.340718925083952	-0.145824313142942	3.59031545459862e-05
AACS	70	0.0579333214298669	0.0447644379557324	1.29418181207049	69	0.199917501449584	-0.0313692888297739	0.147235931689508	0.334842489836008
AACSP1	21	0.50883230585566	0.228919980646258	2.22275182978432	20	0.037925249202275	0.0313135938787566	0.986351017832563	0.0911134326020913
AADAT	55	-0.326538933427393	0.0669908993238088	-4.87437751580295	54	9.98397872865327e-06	-0.460847599978788	-0.192230266875997	7.03956186137911e-05
AAGAB	70	-0.337895997236081	0.0487892946815446	-6.92561758561139	69	1.81373995418699e-09	-0.435227976967345	-0.240564017504818	3.74254694546752e-08
AAK1	58	-0.0376433557263883	0.110112454683139	-0.341862833180055	57	0.733711357318856	-0.25813974286712	0.182853031414343	0.824143474176973
AAMDC	70	0.10970263040921	0.0615568117473262	1.7821363273249	69	0.0791266536831693	-0.0130998489547377	0.232505109773158	0.164512834567444
AAMP	70	-0.174526667484066	0.0469477320573545	-3.71746748641346	69	0.000405444994448274	-0.268184830301569	-0.0808685046665638	0.001842946898945
AAR2	70	-0.240662455638146	0.0442668528453765	-5.43662899368013	69	7.7135363696986e-07	-0.328972410763257	-0.152352500513035	7.296446215465e-06
AARS	70	-0.0758852192737327	0.0698479489152387	-1.08643446876043	69	0.281067716630831	-0.215228064716833	0.0634576261693673	0.430083308021345
AARS2	70	-0.283389529443571	0.0452009065534347	-6.26955410968494	69	2.72568535565943e-08	-0.373562870731037	-0.193216188156106	3.98478284270579e-07
AARSD1	62	-0.373684240408056	0.0532102318684782	-7.02278917580562	61	2.1174517049055e-09	-0.480084675015314	-0.267283805800798	4.27003612409441e-08
AASDH	68	0.0759004371694216	0.0530497843739647	1.43073978650649	67	0.157152432686871	-0.0299873756202526	0.181788249959096	0.280464384115828
AASDHPPT	70	-0.342788885588377	0.0484151354166642	-7.08020090490941	69	9.51718357104781e-10	-0.439374438009648	-0.246203333167107	2.1175073941968e-08
AASS	69	-0.0731101960124176	0.0724834233295679	-1.00864711756231	68	0.316719628975103	-0.217748615310247	0.0715282232854123	0.468609578883599
AATF	70	-0.243633153839206	0.0517676173397756	-4.70628486221657	69	1.25781277704729e-05	-0.346906724702217	-0.140359582976194	8.62200340558188e-05
AATK	51	0.588246201288089	0.162469347549314	3.62065959001614	50	0.000685342770484393	0.261916912830849	0.91457548974533	0.00291342915578475
ABAT	50	-0.185557245125078	0.127420215832505	-1.4562622101425	49	0.151698286338038	-0.441617755571743	0.0705032653215876	0.273108626536025
ABCA11P	64	-0.0236046892286587	0.066783280087826	-0.353452079586633	63	0.724929593591423	-0.157060425390679	0.109851046933362	0.818382016644356
ABCA2	60	0.356404971024594	0.0608687764459457	5.85530039923011	59	2.24525467842393e-07	0.234606830686369	0.47820311136282	2.44618071104124e-06
ABCA3	64	-0.163216620102219	0.0855618583123925	-1.90758619928875	63	0.0610053477001521	-0.334198350461288	0.00776511025685031	0.133862956047559
ABCA5	66	0.398276144954631	0.0739803844619347	5.38353710718491	65	1.07501928455208e-06	0.250527114668287	0.546025175240976	9.8172407451355e-06
ABCA7	65	0.021927128560632	0.118191361203566	0.18552226099559	64	0.853406143469117	-0.214187258599905	0.25804151572117	0.908317982555153
ABCB10	69	-0.269649878498624	0.0548042077776181	-4.92024042374257	68	5.77494607793217e-06	-0.379009972430486	-0.160289784566761	4.33648794518251e-05
ABCB11	63	0.078697364001978	0.0739456283798084	1.06425985857829	62	0.291338414114698	-0.0691178409383941	0.22651256894235	0.440973640524887
ABCB6	70	0.501759003977118	0.116898137344648	4.29227544060684	69	5.65771184052802e-05	0.268553600846836	0.7349644071074	0.000324707280845
ABCB7	70	0.0395729992460355	0.0445243712485787	0.888794117385739	69	0.377201814607373	-0.0492506910368492	0.12839668952892	0.531070407763325
ABCB8	69	-0.339163206564334	0.0579267983336686	-5.85503111376351	68	1.52096176101569e-07	-0.454754332936372	-0.223572080192296	1.74536853506725e-06
ABCB9	68	0.0486622643543362	0.0582103089403394	0.835973305075754	67	0.406141429070609	-0.0675259985809746	0.164850527289647	0.559150271824991
ABCC1	70	0.148486225556467	0.0631772183107364	2.35031281095884	69	0.0216229996180385	0.0224511235482348	0.2745213275647	0.0571818523518514
ABCC10	67	-0.159052167426142	0.0521611784307894	-3.04924413540968	66	0.00330000166904698	-0.263195320331679	-0.0549090145206056	0.0114824528663216
ABCC2	62	-0.212873713851181	0.105678915427972	-2.01434423308659	61	0.048388560285462	-0.424191765577639	-0.00155566212472272	0.110872331809949
ABCC3	52	0.0497565061926342	0.127826072762697	0.38925162228057	51	0.698710636480596	-0.206865042908968	0.306378055294237	0.798466775065214
ABCC4	70	-0.340484065139766	0.0786108240321043	-4.33126187560016	69	4.92460100815168e-05	-0.497308368120414	-0.183659762159118	0.00028716482534916
ABCC5	70	-0.184975622738216	0.0449330959709385	-4.11668990843305	69	0.000104878835853126	-0.274614696532014	-0.095336548944419	0.000559236138676453
ABCC6	43	-0.243766074951917	0.095030144916564	-2.56514472503375	42	0.0139750045026115	-0.43554467162422	-0.0519874782796138	0.0396208524893824
ABCC9	69	-0.00599185568673781	0.0620106032153966	-0.0966263086640979	68	0.923307384155538	-0.129732087822285	0.11774837644881	0.952482708845435
ABCD1	61	0.0224693432152838	0.0656690011807068	0.34216057517691	60	0.73342571261488	-0.108888216820336	0.153826903250904	0.82398952376536
ABCD3	70	-0.344563479067794	0.0570249429433294	-6.04232922092033	69	6.87367855639847e-08	-0.458325127539341	-0.230801830596247	8.82871671905216e-07
ABCD4	70	0.035644821088411	0.0474586040686842	0.751071840141447	69	0.455163391485037	-0.0590325035058002	0.130322145682622	0.602628288762152
ABCE1	70	-0.552128803794676	0.0621969919350843	-8.87709817817136	69	4.99507805475603e-13	-0.676208407689034	-0.428049199900317	3.58578710066661e-11
ABCF1	70	-0.287506657823232	0.0434798412039357	-6.61241278400086	69	6.65483101395834e-09	-0.374246567682614	-0.20076674796385	1.17717273964612e-07
ABCF2	70	-0.674815091617706	0.0617121990640159	-10.9348735234293	69	1.02985557319768e-16	-0.797927560196649	-0.551702623038762	2.96678653567156e-14
ABCF3	70	-0.162032735036494	0.0414489867818645	-3.90920858667141	69	0.00021374832572141	-0.244721201177815	-0.0793442688951733	0.00105036893246618
ABCG4	27	-0.186831791010975	0.145945617546128	-1.28014663374133	26	0.211797728049678	-0.486827304317954	0.113163722296004	0.349197056904858
ABHD10	70	-0.171615518458237	0.0473663784852019	-3.62315051195761	69	0.000551854186102142	-0.266108858047525	-0.0771221788689494	0.00241349163172668
ABHD11	69	-0.441160948862365	0.0652656999704868	-6.75946092759073	68	3.83657518824557e-09	-0.571396625441493	-0.310925272283237	7.199907853271e-08
ABHD12	69	-0.102578748924003	0.0428194094651997	-2.39561334930065	68	0.0193509567204986	-0.188023550173982	-0.017133947674024	0.0521187242936092
ABHD13	70	-0.228535748749755	0.0512714911694626	-4.45736497100111	69	3.13060046348968e-05	-0.330819574983986	-0.126251922515525	0.000192683072922109
ABHD14A	67	0.0837493995347143	0.0736859674429128	1.13657189341509	66	0.259827254637702	-0.0633693812378839	0.230868180307312	0.406166010677139
ABHD14B	70	0.18810537190569	0.0603800688141787	3.11535537471131	69	0.00267632850528496	0.0676504304609848	0.308560313350395	0.00958913243486205
ABHD15	69	-0.252319908641302	0.0612326240890417	-4.12067770073662	68	0.000104768233915975	-0.374507707600907	-0.130132109681697	0.000558915094931256
ABHD16A	70	-0.22734995271996	0.0469347153854542	-4.84396146547039	69	7.52502918853872e-06	-0.320982147987535	-0.133717757452385	5.47458830633539e-05
ABHD17A	69	0.0721426805345826	0.0516691296031007	1.39624338727497	68	0.167182686453698	-0.0309614623024268	0.175246823371592	0.293622038869036
ABHD17B	69	-0.0405367090381514	0.0494193520814325	-0.820259823952277	68	0.414934099944549	-0.139151490728043	0.05807807265174	0.567137112882493
ABHD17C	69	-0.140705055385689	0.0683756416234073	-2.05782427842726	68	0.0434431281710889	-0.277146523911779	-0.00426358685959835	0.101737275030732
ABHD18	69	0.0677255469536163	0.0503046960122514	1.34630665369933	68	0.182674489744068	-0.0326559110438542	0.168107004951087	0.313608584044822
ABHD2	70	-0.271277303323927	0.0825530574992606	-3.28609637900276	69	0.00159903161462308	-0.435966146885161	-0.106588459762692	0.00611336078517221
ABHD3	65	-0.480243516532269	0.0874418376279445	-5.49214803302343	64	7.32534788918558e-07	-0.654928668589647	-0.305558364474892	6.95594464374634e-06
ABHD4	68	0.265549094710551	0.0631734847316569	4.2034897368497	67	7.96002951462393e-05	0.139454291433274	0.391643897987827	0.000438790692578002
ABHD5	69	-0.320001979739857	0.0705916192891547	-4.5331440610404	68	2.41931261944797e-05	-0.460865362850689	-0.179138596629025	0.000153358035181023
ABHD6	67	-0.203033692529841	0.0809320685598839	-2.50869273629909	66	0.0145821696273793	-0.364619780968714	-0.0414476040909675	0.0410944102641388
ABHD8	62	0.138234208305676	0.0708474881043379	1.95115186161712	61	0.0556358089049474	-0.00343409984540699	0.279902516456758	0.124240296157934
ABI1	70	0.150879610041213	0.0412304661775662	3.65942042448474	69	0.000490416677516527	0.0686270805775435	0.233132139504883	0.0021765551702024
ABI2	70	0.0805491701784752	0.0384323533426439	2.09586879732132	69	0.0397641291128914	0.00387872308578641	0.157219617271164	0.0947419883976537
ABL1	70	0.297514579013018	0.0577128493205079	5.15508387674247	69	2.30482943964432e-06	0.182380594868296	0.41264856315774	1.92854495021465e-05
ABL2	69	0.202543501729143	0.0512971708462485	3.94843416094467	68	0.000189205835586443	0.100181591035205	0.30490541242308	0.000946114482637168
ABLIM1	68	0.13692530962472	0.0833009856644509	1.64374177007072	67	0.10491445047078	-0.0293441536600653	0.303194772909506	0.205402677876686
ABLIM2	38	-0.0203524859699142	0.160211869146993	-0.127034820068425	37	0.899600722399443	-0.344972567723357	0.304267595783529	0.937470729388894
ABLIM3	63	0.281589192331927	0.0812153014482789	3.46719383306425	62	0.000961270620037032	0.119242117989538	0.443936266674316	0.00391821111607156
ABR	69	0.0224144502823818	0.0391366532813625	0.572722713954081	68	0.568721398380644	-0.0556815254207189	0.100510425985482	0.698038347694077
ABRACL	68	-0.165015608206557	0.0631666061744693	-2.6123868005632	67	0.0110889788266518	-0.291096681826224	-0.0389345345868908	0.0324549054403997
ABRAXAS1	68	0.227603905836016	0.0579393602737138	3.92831237281156	67	0.000204848482285655	0.111956458702802	0.34325135296923	0.00101359559091243
ABRAXAS2	70	-0.0964246970259097	0.0454871091461293	-2.11982468958714	69	0.0376199437791639	-0.187168996863463	-0.00568039718835654	0.0905081987971164
ABT1	70	-0.106630434023053	0.0464131534517476	-2.29741842759961	69	0.0246330311161661	-0.199222141702286	-0.0140387263438207	0.0638851743503795
ABTB1	64	0.717472955120551	0.0810692860029758	8.85012056346734	63	1.17719459868337e-12	0.555468914147595	0.879476996093507	7.20156566517054e-11
ABTB2	59	0.0824970610252307	0.111755873520399	0.738189935137259	58	0.463375542715718	-0.141206624956475	0.306200747006936	0.609571598180527
ACAA1	70	-0.0698864459279397	0.045085872718418	-1.55007415214989	69	0.125698571665711	-0.159830300993656	0.0200574091377767	0.236151919766985
ACAA2	69	0.20864031346022	0.0434085200438716	4.80643692181522	68	8.84538414023132e-06	0.122019960353325	0.295260666567116	6.3293003547939e-05
ACACA	70	-0.447189055326755	0.0490867637321632	-9.11017596855223	69	1.88163004628145e-13	-0.545114469576686	-0.349263641076823	1.59306556055783e-11
ACACB	64	0.157463069570219	0.0930718559966218	1.69184409061247	63	0.0956168271175855	-0.0285261936354826	0.34345233277592	0.190717782494585
ACAD10	68	0.154556913192559	0.051658579475327	2.99189243611272	67	0.00387799360787578	0.0514459570027262	0.257667869382391	0.0132300298692557
ACAD11	70	0.492452860648144	0.0583641173304094	8.43759630356925	69	3.16646205488126e-12	0.376019632373063	0.608886088923225	1.71732179220968e-10
ACAD8	69	-0.222647271652448	0.0558697999829204	-3.98510951749446	68	0.000167014647999564	-0.334133721723565	-0.111160821581331	0.000846599388008758
ACAD9	70	-0.348671156947683	0.0473167968011182	-7.36886646011175	69	2.84188049362966e-10	-0.443065583783634	-0.254276730111731	7.71586206972987e-09
ACADM	70	-0.180137750176966	0.0443421610716081	-4.06244860023988	69	0.000126570591228307	-0.268597941102717	-0.0916775592512145	0.000662792458599225
ACADS	69	0.191518046693562	0.0589912736864392	3.24654876434017	68	0.00181484552478197	0.0738027928267977	0.309233300560326	0.00683710995766196
ACADSB	70	-0.0859279996940379	0.0591657614393516	-1.45232644021863	69	0.150943215041404	-0.203960464208801	0.0321044648207252	0.27210259212096
ACADVL	70	0.304266269144902	0.0640597391270958	4.74972694692421	69	1.07033117108118e-05	0.176470586280337	0.432061952009468	7.49434533993773e-05
ACAP1	34	1.80250727987314	0.20988858541199	8.58792428532976	33	6.33206471682588e-10	1.37548574209244	2.22952881765384	1.52010670507177e-08
ACAP2	70	-0.0174893133906219	0.0500169481447067	-0.349667743422142	69	0.727653070301943	-0.117270394769561	0.0822917679883172	0.820204299275253
ACAP3	66	0.116900265316121	0.0663203262454168	1.76266119203839	65	0.0826585102619517	-0.0155505723255257	0.249351102957768	0.170561030198196
ACAT1	70	-0.24279922731568	0.0456791999861486	-5.31531260156275	69	1.23940595178012e-06	-0.333926737893814	-0.151671716737547	1.10856866219301e-05
ACAT2	69	-0.339791082072632	0.0833450838691981	-4.0769181132015	68	0.00012189439710622	-0.506103607521032	-0.173478556624233	0.000639361909815601
ACBD3	70	0.205595894538731	0.0546269542889347	3.763634586898	69	0.000348091159349499	0.0966181025387478	0.314573686538714	0.00161399625766944
ACBD4	65	0.2342308707919	0.0618604254867957	3.78644131443773	64	0.000339667286348591	0.110650464368218	0.357811277215582	0.00157955969513301
ACBD5	69	0.293618239622014	0.0532186007945473	5.51721081047471	68	5.80173475451794e-07	0.187422175162327	0.399814304081701	5.64695394140925e-06
ACBD6	70	-0.0717347368363411	0.049811221728108	-1.44013204951891	69	0.154352098949895	-0.17110540524372	0.0276359315710379	0.276819130776566
ACBD7	66	0.0382252133998375	0.075006698485652	0.509623995877509	65	0.612040889852755	-0.111573507529187	0.188023934328862	0.731891028567953
ACCS	57	0.235430385353372	0.0813207380956971	2.89508421672613	56	0.00539516914723026	0.0725253715133081	0.398335399193436	0.0175400325405044
ACD	70	-0.242598453704305	0.0504869142451219	-4.80517491178905	69	8.70246760896008e-06	-0.343317091800523	-0.141879815608087	6.23875825952151e-05
ACE	43	-0.0324804372215373	0.199363082519862	-0.162921022342747	42	0.871362003384771	-0.434811426272354	0.369850551829279	0.919181660599249
ACER2	58	0.568215418886378	0.203701133412542	2.78945634404306	57	0.00716622925073591	0.160310935209333	0.976119902563423	0.0223983792080913
ACER3	70	-0.134554956579255	0.064916705292464	-2.07273237255427	69	0.0419347624057897	-0.264060240166324	-0.00504967299218631	0.0988309498178099
ACIN1	70	-0.114850631225998	0.0369554353121899	-3.10781432435499	69	0.00273684765261245	-0.188574707465344	-0.0411265549866528	0.00976967406344535
ACLY	70	-0.125803135491738	0.0552130403200291	-2.27850404112055	69	0.0257962052801493	-0.235950137132311	-0.0156561338511648	0.0663972413001012
ACO1	69	-0.0888505525451703	0.0484338172059747	-1.83447346648965	68	0.0709586816220055	-0.185498730010245	0.00779762491990434	0.150896239762032
ACO2	70	-0.180777379275064	0.0373275355470309	-4.84300333857545	69	7.5521456733814e-06	-0.255243775171866	-0.106310983378263	5.49251460088348e-05
ACOT11	69	0.0643815262109889	0.058792391202573	1.09506561808582	68	0.277351445047863	-0.0529368638382147	0.181699916260192	0.426088156860481
ACOT13	70	-0.171462296694623	0.0481535703169639	-3.56073901822849	69	0.000675065872579599	-0.267526041019494	-0.0753985523697513	0.00287690896936804
ACOT7	70	-0.407092169518428	0.0698395588256792	-5.82896250153208	69	1.62496837202501e-07	-0.546418277190829	-0.267766061846027	1.8522635369095e-06
ACOT8	70	0.0128873136705465	0.0522368976672007	0.246709016922312	69	0.805865952140681	-0.0913224458300614	0.117097073171154	0.875702667436662
ACOT9	70	-0.0643628356222049	0.0409561862007431	-1.5715046148764	69	0.120640148608528	-0.146068191503656	0.0173425202592459	0.228799570488575
ACOX1	70	-0.166520113620641	0.043571414607132	-3.82177432433842	69	0.000286836657504077	-0.253442707420876	-0.0795975198204065	0.00136011345377414
ACOX2	46	-0.0419866206214449	0.130383126541821	-0.322024956258258	45	0.74892503384716	-0.304591717642207	0.220618476399317	0.83490650246967
ACOX3	69	0.0250774801038837	0.051430532558931	0.487599075027057	68	0.627402228080012	-0.0775505497443541	0.127705509952121	0.743368688252882
ACOXL	15	-0.132673105444544	0.181288125922743	-0.731835605720164	14	0.476341869934571	-0.52149746460121	0.256151253712122	0.620738770936944
ACP1	70	-0.0659777179317715	0.0391256263486663	-1.68630445283646	69	0.0962541479281346	-0.144031206829242	0.0120757709656994	0.191627132412662
ACP2	70	-0.320929463957663	0.0739726637378733	-4.33848732411336	69	4.79923300441174e-05	-0.468500890324803	-0.173358037590523	0.000281036395205547
ACP6	70	0.0856490589022189	0.0585193237061219	1.46360301995867	69	0.147843343551352	-0.0310937976204854	0.202391915424923	0.267620277603561
ACP7	42	0.243240950642744	0.131066488211952	1.85585922046978	41	0.0706712910573638	-0.0214531921531639	0.507935093438652	0.15037223772033
ACSF2	66	0.256800086000852	0.0784555281415331	3.27319300607583	65	0.00170550768292044	0.10011357662648	0.413486595375223	0.00647136014754382
ACSF3	67	-0.0159222025087111	0.0510078754008772	-0.312151846819271	66	0.755909185094874	-0.117762711620455	0.0859183066030331	0.840275452359892
ACSL1	70	-0.111819143321752	0.0516336667934982	-2.16562468377381	69	0.0337991287790175	-0.214825490156616	-0.00881279648688797	0.0829625179347314
ACSL3	70	-0.0386822083680844	0.0627389743960184	-0.616557869178991	69	0.539555373544294	-0.163843037687952	0.0864786209517829	0.674153982923466
ACSL4	70	-0.0560442703856689	0.0514075109724136	-1.09019614693549	69	0.279419405436549	-0.15859944870216	0.0465109079308225	0.42842892454507
ACSL5	50	-0.150006326154308	0.138273307866821	-1.08485381935599	49	0.283295235618034	-0.42787694159942	0.127864289290804	0.432250303788638
ACSM3	44	0.020677972059387	0.176158431788979	0.117382811877874	43	0.907103285354264	-0.334579363157653	0.375935307276427	0.942232033515724
ACSS2	69	0.130506311324831	0.0833768834636612	1.56525772976043	68	0.122164675892841	-0.035869669226352	0.296882291876013	0.231019338504263
ACTA2	61	0.251429927046215	0.0940956078237908	2.67206868483232	60	0.00969210901572556	0.063210687655178	0.439649166437252	0.0289471337265147
ACTB	70	-0.0796681023659926	0.0596348195253203	-1.33593264807595	69	0.185960894565996	-0.198636312158778	0.0393001074267928	0.317795420898531
ACTG1	70	0.291529341549085	0.0624028884418678	4.67172832585567	69	1.42946392967884e-05	0.167038985362533	0.416019697735638	9.66718563662683e-05
ACTG1P20	63	-0.0111108736668348	0.074770785585479	-0.148599129724707	62	0.882352227155677	-0.160575544358417	0.138353797024748	0.925744425141203
ACTG2	28	-0.0339385995273065	0.292651269202384	-0.115969425384026	27	0.908535027226907	-0.634409404363446	0.566532205308833	0.943189215797597
ACTL6A	70	-0.352604933192454	0.0467525887164299	-7.54193388800609	69	1.37403736715027e-10	-0.44587379569669	-0.259336070688217	4.20398577629342e-09
ACTN1	70	0.00464434165087815	0.0355783671952019	0.130538358474879	69	0.896520344149793	-0.0663325588621916	0.0756212421639479	0.935092597636277
ACTN4	70	-0.0291265431079207	0.0431041621428429	-0.675724608946075	69	0.501474000506398	-0.115116993746824	0.0568639075309827	0.642542529992659
ACTR10	70	-0.104962111473602	0.0411042659307152	-2.5535576197985	69	0.0128762397621295	-0.18696287833343	-0.0229613446137726	0.0369305340578686
ACTR1A	70	-0.272595854288432	0.0497619169903333	-5.47800146729448	69	6.55613876327426e-07	-0.371868162435244	-0.173323546141619	6.27928627145724e-06
ACTR1B	70	0.277152803864473	0.0463811683461124	5.97554597582068	69	9.00609418615223e-08	0.184624904725079	0.369680703003867	1.11046793350322e-06
ACTR2	70	-0.129193339251543	0.0353004539887126	-3.65982089898484	69	0.000489776159762657	-0.199615818087529	-0.0587708604155569	0.0021750179731442
ACTR3	70	-0.132883198199827	0.0359720138679858	-3.69407169383113	69	0.000437849632797198	-0.20464540233794	-0.0611209940617151	0.00197205696542283
ACTR3B	67	-0.328873044930092	0.057680664692642	-5.70161676677149	66	3.01611784738651e-07	-0.44403620771694	-0.213709882143244	3.16778059141702e-06
ACTR5	70	-0.331460538874731	0.053219044404992	-6.22823169000081	69	3.22697925417327e-08	-0.437629627506858	-0.225291450242604	4.63907024083418e-07
ACTR6	68	-0.103095415583406	0.0488677176488214	-2.10968345860312	67	0.0386245209111368	-0.200635788252603	-0.00555504291420933	0.0924663909176972
ACTR8	70	-0.0718244764555837	0.0437154854072707	-1.64299848866914	69	0.104933010384844	-0.159034483638006	0.0153855307268383	0.205420883978168
ACVR1	69	0.104577228986644	0.063546513377657	1.64568004486952	68	0.10444454588494	-0.0222278641591613	0.23138232213245	0.204610231219489
ACVR1B	68	0.0971023145043347	0.0461729024375853	2.10301517509309	67	0.0392236921099181	0.00494081550931945	0.18926381349935	0.0936454567196429
ACVR1C	21	1.01160793308231	0.337806115913862	2.99464066938405	20	0.00716175865945862	0.30695672302314	1.71625914314148	0.0223875606798353
ACVR2A	67	0.0975673676722708	0.0542709695067516	1.79778191838148	66	0.0767856054440902	-0.0107881190269554	0.205922854371497	0.160699905647779
ACVR2B	68	0.404898550233613	0.0573429925675495	7.06099441455984	67	1.17799934229498e-09	0.290441458023974	0.519355642443252	2.55678878774827e-08
ACY1	68	-0.105984963532688	0.0617174324538019	-1.71726138497453	67	0.0905509013255377	-0.229173474299468	0.0172035472340928	0.183015953822604
ACYP1	69	-0.158052961502395	0.0620177654744703	-2.54851106442166	68	0.0130813621750326	-0.281807485703403	-0.034298437301387	0.0374317306200431
ACYP2	NA	NA	NA	NA	NA	NA	NA	NA	NA
ADA	67	0.110236193806503	0.0720776273768665	1.52940930241946	66	0.130942030988134	-0.0336714324166516	0.254143820029658	0.243793531255564
ADAL	68	-0.0169505663514514	0.055074553898024	-0.307774918755349	67	0.759208353223825	-0.126879836026124	0.0929787033232209	0.842363455676198
ADAM10	70	0.156483153718007	0.0380020351117751	4.11775720057476	69	0.000104490245588488	0.0806711680070267	0.232295139428987	0.000557700343513915
ADAM11	NA	NA	NA	NA	NA	NA	NA	NA	NA
ADAM15	70	-0.142423595552384	0.0551614127840996	-2.58194249139025	69	0.0119508617090868	-0.252467603076861	-0.0323795880279067	0.0346149316939185
ADAM17	70	0.182224020858447	0.0422883600447739	4.30908223126913	69	5.32956456854382e-05	0.0978610508747208	0.266586990842172	0.000308106336355067
ADAM19	61	-0.0489333418390452	0.0949231687699948	-0.515504723168418	60	0.608094673691213	-0.238807949588358	0.140941265910267	0.728767413248607
ADAM22	56	-0.0710136665824432	0.0670203349639653	-1.0595838803346	55	0.293965173826637	-0.205325419241269	0.0632980860763825	0.443798780767881
ADAM8	48	0.409641035792775	0.0911432428671072	4.49447510212094	47	4.53924834659613e-05	0.226284481564304	0.592997590021246	0.000267649140946825
ADAM9	70	0.191534406763819	0.0459065417375104	4.17226825446787	69	8.6388276210612e-05	0.0999533618011434	0.283115451726494	0.000471753998745395
ADAMTS10	41	0.638007508902798	0.146317388607544	4.36043531786967	40	8.84517090609554e-05	0.342289035614211	0.933725982191386	0.000481717606282866
ADAMTS13	53	0.690565245283324	0.112085029322847	6.1610836831227	52	1.07086081262954e-07	0.465650179297387	0.915480311269261	1.28984980659236e-06
ADAMTS14	31	0.0344696306476575	0.314632244329138	0.109555302321776	30	0.91349162733715	-0.608095135809983	0.677034397105298	0.946430232489148
ADAMTS16	27	0.521043678258964	0.176553386957912	2.95119616358974	26	0.00662357981740299	0.158132993874869	0.883954362643058	0.0209472836483652
ADAMTS17	39	0.0353535309939196	0.112610733067371	0.313944595074865	38	0.755280170469783	-0.192614979821515	0.263322041809355	0.839975924041474
ADAMTS2	32	0.556279905996272	0.146098581561051	3.8075654126992	31	0.000621762482430759	0.258309884403066	0.854249927589479	0.00267960664178727
ADAMTS7	56	0.221027634980033	0.0830323301267339	2.6619466735749	55	0.0101660579738201	0.0546271269452094	0.387428143014856	0.030087191190831
ADAMTSL4	49	0.438713364321441	0.124407548825452	3.52642077159619	48	0.000938174204797076	0.188575222542154	0.688851506100729	0.00383817414437638
ADAMTSL5	34	0.344850301173965	0.307041546421121	1.12313888851051	33	0.269483345315158	-0.279830421972306	0.969531024320236	0.417337029824057
ADAP1	54	0.072821713450496	0.0791893046374903	0.919590262647921	53	0.361953468434179	-0.086011917198157	0.231655344099149	0.514934058286747
ADAP2	36	0.195537442487751	0.142949981862027	1.36787315353758	35	0.180070819214721	-0.094666449033593	0.485741334009096	0.31050457958807
ADAR	70	-0.157855803020901	0.0346674732235632	-4.55342683912733	69	2.20785173343715e-05	-0.227015519781601	-0.0886960862602006	0.000141422371213118
ADARB1	68	0.329803276767913	0.0635568547213933	5.18910632399341	67	2.13380290592044e-06	0.202943263788439	0.456663289747386	1.80038098361077e-05
ADAT1	70	-0.425350213799965	0.0616754551465393	-6.89658816119547	69	2.04679314576874e-09	-0.548389380269206	-0.302311047330725	4.15388522959216e-08
ADAT2	69	-0.466877642156448	0.0692552117075698	-6.74140805644837	68	4.13317181851373e-09	-0.6050742654585	-0.328681018854396	7.69144440253956e-08
ADAT3	60	-0.286794272705888	0.086829400446971	-3.3029627203408	59	0.0016287497429765	-0.460539501682453	-0.113049043729324	0.00621412569637165
ADCK1	65	-0.451453962961768	0.0674713511590769	-6.69104672140591	64	6.46263152944144e-09	-0.586243481989139	-0.316664443934398	1.14867061367043e-07
ADCK2	69	-0.115157343162285	0.0531625009822395	-2.16613855696438	68	0.0338097462648327	-0.221241462189453	-0.00907322413511806	0.0829793971726619
ADCK5	65	-0.105537156405697	0.0618471521356921	-1.70641901464031	64	0.0927785456599405	-0.229091046262267	0.0180167334508728	0.186380519817859
ADCY3	70	-0.472475633290309	0.0578128051605096	-8.17250835655772	69	9.66666110128765e-12	-0.587809023879755	-0.357142242700862	4.43368466431588e-10
ADCY6	69	0.159025174517123	0.0591916606743972	2.68661451132267	68	0.00906430923648815	0.0409100546416255	0.27714029439262	0.0273817932022035
ADCY7	70	-0.0102449962254264	0.0932552901856893	-0.109859678791697	69	0.912839557719221	-0.196284209815862	0.17579421736501	0.945931377619722
ADCY9	68	-0.0692931730196437	0.0608398977892443	-1.1389429558163	67	0.258782842482658	-0.190730117265021	0.0521437712257331	0.404732497493501
ADD1	70	-0.00320641634645596	0.0363000072320768	-0.0883310112297331	69	0.929869461961328	-0.0756229493424471	0.0692101166495351	0.956736141845866
ADD3	70	0.416423180801473	0.0687138540626535	6.06025067989604	69	6.39205612632109e-08	0.279342792684835	0.553503568918112	8.30143963665423e-07
ADGRA2	64	0.15837547532393	0.108016607645091	1.46621412000183	63	0.147563829889977	-0.0574784909988104	0.37422944164667	0.267246642882219
ADGRA3	67	-0.398893488624869	0.0696362859064139	-5.72824187035122	66	2.71640197940744e-07	-0.537926819333605	-0.259860157916133	2.87751808534937e-06
ADGRB1	31	1.11349561685441	0.42154068882398	2.64149024370779	30	0.0129825015877747	0.25259467885894	1.97439655484987	0.0371920250833034
ADGRB2	53	-0.318159217775631	0.0952577877864941	-3.3399811728647	52	0.00155576849809294	-0.509307953294644	-0.127010482256619	0.00597369860216332
ADGRE2	37	0.448932580566881	0.248374687232355	1.80748121142837	36	0.079049532375196	-0.0547946326044553	0.952659793738216	0.164421393920912
ADGRE5	66	-6.93652882279696e-05	0.0643224110386684	-0.00107840000254763	65	0.999142864349901	-0.128530090732725	0.128391360156269	0.999458264577655
ADGRF1	28	0.173252888081545	0.286876393739204	0.603928701916989	27	0.550932064627791	-0.415368851050369	0.761874627213458	0.683717973457181
ADGRG1	66	-0.188617361363251	0.0910101658535482	-2.0724867336993	65	0.0421905005738727	-0.370377213638416	-0.00685750908808672	0.0993808732855096
ADGRG5	14	-0.216597310805315	0.206011933177358	-1.05138235181184	13	0.312234909855566	-0.661659034098987	0.228464412488357	0.463897841287084
ADGRG6	61	0.312563551364065	0.115848973690578	2.69802607141685	60	0.00904431461665513	0.0808311016082139	0.544296001119916	0.0273325595131668
ADGRL1	70	0.043895736360191	0.0663702999009161	0.661376194257413	69	0.510573622731626	-0.0885093891264338	0.176300861846816	0.650034098572744
ADGRV1	35	0.0513143842489485	0.0963402445561881	0.532637056147607	34	0.597749053454669	-0.144472548776691	0.247101317274588	0.720651638878823
ADH5	70	-0.116036744928094	0.0446805220972901	-2.59703198354371	69	0.0114838465694789	-0.20517194763068	-0.0269015422255073	0.0334561661806192
ADI1	70	-0.218761405461789	0.0531724140637571	-4.11418983534357	69	0.000105794548967173	-0.324837469108465	-0.112685341815113	0.000563712391349949
ADIPOR1	70	0.0583939743617008	0.0387339860908491	1.50756429314401	69	0.136231209675798	-0.0188782135990662	0.135666162322468	0.250990778157723
ADIPOR2	70	-0.152110480814852	0.0378026789397397	-4.0238016215022	69	0.000144597427256474	-0.227524761844456	-0.076696199785247	0.000746094471133543
ADIRF	46	-0.064763201912061	0.0881805878322088	-0.734438310110761	45	0.466491637971584	-0.242368022698418	0.112841618874296	0.612001272385006
ADK	69	-0.272897192645434	0.0598728229781644	-4.55794764754886	68	2.21057164434419e-05	-0.39237155073536	-0.153422834555508	0.000141555716555551
ADM	68	2.83683330384547	0.182348113845894	15.5572396336544	67	6.26924164447069e-24	2.47286494526831	3.20080166242263	1.26422107416044e-20
ADM2	53	0.41392405075038	0.463714596108011	0.89262674546903	52	0.376169436082811	-0.516587361990232	1.34443546349099	0.529963304931214
ADM5	49	-0.265220420624862	0.100698590118516	-2.63380470682573	48	0.0113294931789953	-0.467688505960906	-0.0627523352888179	0.0330498182136342
ADNP	70	-0.0705307624631775	0.0372520162243662	-1.89334080706869	69	0.0625064019760724	-0.144846501433477	0.00378497650712244	0.136441374216731
ADNP2	70	-0.0149947076571492	0.0441042717812991	-0.339983113914767	69	0.734902045834407	-0.102980322433895	0.0729909071195969	0.825207717470511
ADO	70	-0.156255985350473	0.0441143523600079	-3.54206685559615	69	0.000716739110879099	-0.244261710331496	-0.0682502603694506	0.00303063418938623
ADORA2B	62	0.318115380448282	0.0983997950557289	3.23288661595399	61	0.00197870052927738	0.121352829496178	0.514877931400386	0.00736311611146298
ADPGK	70	-0.0978231139044552	0.041056698010044	-2.38263471359835	69	0.0199489801936226	-0.179728985359035	-0.0159172424498754	0.0535270689070927
ADPRHL1	46	0.174629988082727	0.0856877439848218	2.03798092891394	45	0.0474556683012371	0.0020460125373428	0.347213963628111	0.109095412401082
ADPRHL2	70	0.241700167353759	0.0450404197069709	5.36629473984122	69	1.01592095028703e-06	0.151846988564831	0.331553346142686	9.35456974647854e-06
ADPRM	68	0.374309980549539	0.0712900642696834	5.25052101417051	67	1.68601613517212e-06	0.23201441670825	0.516605544390827	1.45919664106079e-05
ADRA2C	41	0.153263408861888	0.155531978502302	0.985414127292286	40	0.330344050719212	-0.161078445294758	0.467605263018535	0.482073278426501
ADRM1	70	-0.252112329806188	0.0535899726660599	-4.70446834106819	69	1.26631270484063e-05	-0.359021400072067	-0.14520325954031	8.67222859486718e-05
ADSL	70	-0.307762445239623	0.0419071054460151	-7.34392036777828	69	3.15536162202346e-10	-0.391364833109566	-0.224160057369679	8.4125278244861e-09
ADSS	70	-0.242361691941527	0.04101754388864	-5.90873243409023	69	1.17918972863299e-07	-0.324189453061129	-0.160533930821924	1.40175705040391e-06
ADSSL1	53	1.3579889561138	0.238640438497705	5.69052321837258	52	5.9061804581135e-07	0.879121882643862	1.83685602958374	5.73101027654741e-06
AEBP2	70	0.116083552680654	0.044248899091606	2.62342239160195	69	0.0107066904009607	0.0278094143143123	0.204357691046997	0.0314956078725921
AEN	70	-0.442915071629153	0.0895956165009719	-4.94349041757359	69	5.17047748447678e-06	-0.621653435981473	-0.264176707276833	3.93183172988221e-05
AES	70	0.139750207379379	0.0429721598868054	3.2521103837345	69	0.00177400618046136	0.0540230940359414	0.225477320722817	0.00670374873849982
AFAP1	65	0.132822327548298	0.0580226630928956	2.28914566254303	64	0.0253801635675398	0.0169087328651353	0.24873592223146	0.0654972686056654
AFAP1L1	68	0.714684083578096	0.10831248834024	6.59835347271378	67	7.8745091889473e-09	0.498491452005708	0.930876715150483	1.35300048667102e-07
AFDN	69	0.172657904142304	0.0515665661193943	3.34825289204912	68	0.00132880037792323	0.06975842355053	0.275557384734078	0.00520399893769301
AFF1	70	0.262797232070482	0.0635750148275804	4.13365585180287	69	9.88635033374588e-05	0.135968547724826	0.389625916416139	0.000531505145669295
AFF4	70	0.315859231734928	0.0541129508585236	5.83703580609993	69	1.57316859212681e-07	0.207906848521793	0.423811614948063	1.80131477312384e-06
AFG3L1P	68	-0.371844536370934	0.0572780081697924	-6.4919250555755	67	1.21555521600102e-08	-0.486171919179769	-0.257517153562099	1.96813473002443e-07
AFG3L2	70	-0.254677756552575	0.0505891050057456	-5.03424119726274	69	3.66226388670638e-06	-0.355600259638166	-0.153755253466984	2.90544840968959e-05
AFMID	70	0.0971310879812238	0.0489459261226368	1.98445704628933	69	0.0511831948257281	-0.000513362925308139	0.194775538887756	0.116041049430121
AFTPH	70	0.0589716066680674	0.0439945832675882	1.34042880482319	69	0.18450290865882	-0.0287951855111612	0.146738398847296	0.315912274787336
AGA	70	0.11754475846589	0.0499350332299629	2.35395374475005	69	0.0214283770933666	0.0179270928705475	0.217162424061232	0.0567894951822265
AGAP1	70	0.515275099494968	0.0579744593985227	8.88796730216856	69	4.77249403791286e-13	0.399619217524564	0.630930981465371	3.47093320488469e-11
AGAP11	44	0.383971305482142	0.156340224474237	2.45599817176556	43	0.0181652278066076	0.0686811943594224	0.699261416604862	0.0494944056345297
AGAP2	44	0.145187013587049	0.134282816296351	1.08120322161425	43	0.285633374975573	-0.125620094528145	0.415994121702243	0.434700134624332
AGAP2-AS1	62	0.329568347819873	0.0575786192045191	5.72379734653322	61	3.38499636530238e-07	0.214432782867074	0.444703912772672	3.51197331034319e-06
AGAP3	70	-0.0019159018129307	0.041415402761273	-0.0462606104297561	69	0.963236163778323	-0.0845373696663519	0.0807055660404905	0.978877823194994
AGAP4	55	-0.0898249772952848	0.0693958236752004	-1.29438592321781	54	0.20104020308867	-0.228955226868445	0.0493052722778749	0.336031481042338
AGAP5	40	0.321162368368058	0.181817795661382	1.76639677760801	39	0.0851560059353104	-0.046598836017319	0.688923572753435	0.174771514031926
AGAP6	61	-0.211678349566265	0.0602885266684172	-3.5110884485614	60	0.000853922545219417	-0.332273358153549	-0.0910833409789818	0.00353126582737828
AGAP7P	53	0.0466848238166472	0.0868092497496275	0.537786283734673	52	0.593018897626065	-0.127510679843245	0.220880327476539	0.717053430751778
AGAP9	45	0.028050011550081	0.0859762540480141	0.32625300858556	44	0.745779693800032	-0.145223743030426	0.201323766130588	0.83268159097359
AGBL5	70	0.155553193671787	0.0445254168128415	3.49358197646167	69	0.000836648572276567	0.0667274175452696	0.244378969798304	0.00347018298994742
AGER	54	0.117039376369681	0.088878695618473	1.31684399231164	53	0.193556628078369	-0.061228711436147	0.295307464175509	0.326997191472536
AGFG1	70	-0.0778430586362802	0.0394235279216047	-1.97453304511647	69	0.0523246970749979	-0.156490844910838	0.000804727638277269	0.118212642511045
AGFG2	67	-0.163305317134682	0.0953594028437285	-1.71252453627778	66	0.0914949107179418	-0.353696507865011	0.0270858735956459	0.184403272050212
AGGF1	70	0.0256751668083603	0.0425675250098213	0.60316325185541	69	0.548377654415434	-0.0592447220424454	0.110595055659166	0.681483209915257
AGK	69	-0.305242580068416	0.0476236444204889	-6.40947545663039	68	1.61504853227367e-08	-0.400274082910964	-0.210211077225868	2.52756359433134e-07
AGL	70	-0.0363441273173795	0.0515557373890124	-0.704948259068547	69	0.483215309742239	-0.139195009244063	0.0665067546093036	0.626593469393279
AGO1	70	-0.0751551089503575	0.0414289766777806	-1.81407109171164	69	0.0740145088038587	-0.157803656026281	0.00749343812556569	0.156068561238396
AGO2	70	0.0401891826683089	0.0465624111815515	0.863125032584915	69	0.391058982080686	-0.0527002860346653	0.133078651371283	0.544639313148351
AGO3	70	0.0972905035789868	0.0437823084422389	2.22214193450627	69	0.0295549589414707	0.00994718808933132	0.184633819068642	0.0742408237739327
AGO4	70	0.486512855957599	0.0705606277537482	6.8949621261236	69	2.06069466023685e-09	0.345748255133171	0.627277456782028	4.17445926514829e-08
AGPAT1	70	-0.00790225942920175	0.0504816843406838	-0.156537158623157	69	0.876066747480747	-0.10861046415154	0.0928059452931363	0.921821194090315
AGPAT2	67	0.11830213698126	0.0614286667627808	1.92584575273475	66	0.0584330479137597	-0.00434415338098687	0.240948427343507	0.129327798668441
AGPAT3	69	0.0558583961338327	0.322290950071796	0.173316675883668	68	0.862917403314321	-0.587263181615443	0.698979973883108	0.913968096276478
AGPAT4	63	0.329647813671903	0.0769631414845376	4.28319072368078	62	6.5230514727359e-05	0.175800685982902	0.483494941360904	0.000368214352097604
AGPAT4-IT1	36	0.537022843190339	0.134872056873437	3.98172057014209	35	0.000329145552700487	0.263218011232143	0.810827675148535	0.00153545881177754
AGPAT5	70	0.259119448724952	0.0726280184020753	3.56776151168607	69	0.000659996676910053	0.114230516405408	0.404008381044496	0.00282027476155245
AGPS	68	-0.268064026871597	0.0492696840773085	-5.440749862552	67	8.07911194157558e-07	-0.366406727890092	-0.169721325853102	7.61950940000125e-06
AGRN	70	0.378014764495369	0.056061793910106	6.74282319794312	69	3.87784728953437e-09	0.266174545771716	0.489854983219022	7.25893743261193e-08
AGTPBP1	68	0.249694851146337	0.0569031856097074	4.38806454280023	67	4.14864673216667e-05	0.136115617298709	0.363274084993965	0.000247180450746498
AGTRAP	70	-0.183345463621776	0.0480673710159646	-3.81434348803644	69	0.000294047575159879	-0.279237245046333	-0.0874536821972191	0.00138984941661974
AHCTF1	70	-0.217979340445485	0.0487190286621549	-4.4742135964384	69	2.94535330250293e-05	-0.315171143303529	-0.120787537587441	0.000182751963513622
AHCY	70	-0.195782886312345	0.035482723719291	-5.51769610081831	69	5.60707960617471e-07	-0.266568983311662	-0.124996789313029	5.48396119154177e-06
AHCYL1	70	-0.0653057149437919	0.0381371067460564	-1.71239300817031	69	0.0913152657332569	-0.141387161192292	0.0107757313047086	0.184183004567157
AHCYL2	65	-0.0333797020158689	0.049325189549997	-0.676727293303852	64	0.501017634422569	-0.131918095884739	0.0651586918530013	0.642069048862524
AHDC1	67	0.636038864750594	0.132982927428214	4.78286105631067	66	1.00807860727055e-05	0.370529883519304	0.901547845981884	7.09879354491279e-05
AHI1	69	-0.0719634864811739	0.064044208292991	-1.12365330760205	68	0.26511141202929	-0.199761714367859	0.0558347414055113	0.412102406561578
AHNAK	70	0.452356756939988	0.0660051237656959	6.85335821118611	69	2.45015661547605e-09	0.320680137910027	0.584033375969949	4.85869390395197e-08
AHNAK2	66	0.719014637989139	0.128299299688738	5.60419768255567	65	4.58110243961325e-07	0.462783242960614	0.975246033017663	4.58565046550095e-06
AHR	67	0.0923255194774445	0.0740761883104877	1.24635893912988	66	0.217038319170094	-0.0555723623948865	0.240223401349776	0.355747588321607
AHRR	65	-0.079466651350509	0.0811670192407444	-0.979050999948735	64	0.331241274371704	-0.241616412640319	0.0826831099393009	0.482886037599443
AHSA1	70	-0.522485243125822	0.0663984605482492	-7.86893609899513	69	3.47155114139904e-11	-0.65494654756673	-0.390023938684913	1.31859499004304e-09
AHSA2P	69	0.246846232862101	0.0617874698617271	3.9950856284375	68	0.000161425251688598	0.123551256401367	0.370141209322836	0.000821834962808464
AIDA	NA	NA	NA	NA	NA	NA	NA	NA	NA
AIF1L	65	-0.298655906250619	0.117027870632691	-2.55200666846271	64	0.0131086655302337	-0.532445953795201	-0.0648658587060373	0.0375050198364045
AIFM1	70	-0.521917186777063	0.0636725956053701	-8.19688881558717	69	8.72335502353275e-12	-0.648940539447974	-0.394893834106153	4.08230930658235e-10
AIFM2	70	-0.200493853532556	0.0646923780128946	-3.09918818400203	69	0.00280764035688453	-0.329551616441764	-0.0714360906233471	0.009982221252831
AIFM3	28	0.300381741559946	0.164096729683315	1.83051631887877	27	0.0782326083529621	-0.0363169360588956	0.637080419178787	0.163051368832604
AIG1	67	0.123753911517753	0.0489220926047095	2.5296119795546	66	0.0138144767416981	0.0260778021224998	0.221430020913006	0.0392510212737731
AIMP1	70	-0.179331317913939	0.0424764450767013	-4.22190034006174	69	7.25688780076238e-05	-0.264069507269759	-0.0945931285581194	0.000404452977880681
AIMP2	70	-0.687390843986455	0.0734120132536762	-9.36346537195713	69	6.53381247423697e-14	-0.833843803240668	-0.540937884732242	6.61794649787783e-12
AIP	70	0.166959525159247	0.0500852101607551	3.33350952553394	69	0.00138189099143151	0.0670422647843657	0.266876785534127	0.00538245934537908
AJUBA	68	0.299861782204655	0.0649393783646028	4.6175647158351	67	1.81199263867023e-05	0.170242240483698	0.429481323925612	0.000118951230278138
AK1	70	-0.044725194854285	0.0892575203353604	-0.501080409653354	69	0.61790936633594	-0.222789075811153	0.133338686102583	0.736293696091764
AK2	70	0.12393581411901	0.0682634027287593	1.81555283160235	69	0.0737841662871713	-0.0122459481743471	0.260117576412367	0.15575565060735
AK3	70	0.0242089471301043	0.0531150610068303	0.455783099392302	69	0.649977165612082	-0.081752700298613	0.130170594558822	0.759831013839642
AK4	70	1.99235025256921	0.164477276382719	12.113224977858	69	9.5977770649399e-19	1.66422706416018	2.32047344097825	5.75399705012154e-16
AK6	70	-0.267295992708305	0.0517996019235223	-5.16019395482894	69	2.25992434396198e-06	-0.370633371070016	-0.163958614346594	1.89367562974134e-05
AK7	49	0.291735076189675	0.118658417910922	2.45861255632688	48	0.0176057280185119	0.053156336853274	0.530313815526075	0.0481779248589477
AKAP1	69	-0.380374266622745	0.0687331996925724	-5.53406895538212	68	5.429973858101e-07	-0.517529231167037	-0.243219302078453	5.31308690429627e-06
AKAP10	69	0.238587023637374	0.0498462066756803	4.78646299385866	68	9.52859135089123e-06	0.139120466866423	0.338053580408325	6.7592968770537e-05
AKAP11	70	0.118623760407524	0.0500588224645568	2.36968739109901	69	0.0206051551867224	0.0187591420461894	0.218488378768859	0.0549950129168424
AKAP12	67	0.797876246543615	0.176513657230788	4.52019554215234	66	2.62844103144326e-05	0.445455359057479	1.15029713402975	0.000165307850749856
AKAP13	69	0.153409590518153	0.0497826642647474	3.08158658810044	68	0.00297194308496307	0.0540698306540465	0.252749350382259	0.0104973951450081
AKAP17A	69	0.212481230752048	0.0557307612263355	3.81263822844826	68	0.000298679621126565	0.101272228199961	0.323690233304136	0.00140844203992973
AKAP2	68	0.114772774651271	0.0581725657641442	1.97297081783547	67	0.0526266375383066	-0.00134015258904628	0.230885701891589	0.118791500343413
AKAP3	37	0.232134691097245	0.164119955977383	1.41442087109282	36	0.165829506990898	-0.100716007061662	0.564985389256152	0.291962070328765
AKAP8	70	-0.0903580945299874	0.0449289442353598	-2.01113326982819	69	0.0482198596865103	-0.179988885837927	-0.000727303222047671	0.110520037979559
AKAP8L	68	0.115167154945427	0.0457070788243961	2.51967874359008	67	0.0141368446499126	0.0239354437738399	0.206398866117015	0.0400438626004803
AKAP9	70	0.199954407386322	0.0418879837139055	4.77355054260927	69	9.79394387848893e-06	0.11639016632818	0.283518648444465	6.92759129823474e-05
AKIP1	70	-0.192947417614565	0.0482737918468591	-3.99693933773961	69	0.000158556371899669	-0.289250997329297	-0.0966438378998319	0.000808584974230707
AKIRIN1	70	-0.160240143256313	0.0542612185610932	-2.95312467182979	69	0.00429767212140555	-0.268488312442898	-0.0519919740697283	0.0144331510972018
AKIRIN2	69	-0.0075744458737212	0.0463969717421202	-0.163253022542524	68	0.870803436720989	-0.10015816149755	0.0850092697501081	0.918759386294267
AKNA	68	0.121868834494202	0.0933279475097466	1.30581286469923	67	0.196082048673194	-0.0644145283992869	0.30815219738769	0.330057065083381
AKR1A1	70	-0.136400323643687	0.0415478644882696	-3.28296833841358	69	0.00161443138058573	-0.219286045412057	-0.0535146018753168	0.00616479891274793
AKR1B1	65	-0.176805049860004	0.0849044859930747	-2.08239939023276	64	0.0413082756297318	-0.346421259312971	-0.00718884040703777	0.0976449456541678
AKR7A2	70	0.143250273152003	0.0717625777686736	1.99616955809154	69	0.0498634431902791	8.78476561112784e-05	0.286412698647895	0.113676351166164
AKT1	70	-0.0995735589102677	0.046589905922285	-2.13723459919329	69	0.0361254041667168	-0.192517878120208	-0.00662923970032774	0.0876540926740443
AKT1S1	70	-0.112934830729164	0.0497901202806392	-2.26821767235373	69	0.0264489441462306	-0.212263402900663	-0.0136062585576648	0.0678254889077095
AKT2	70	-0.0423455683607047	0.0390928574319573	-1.08320473719295	69	0.282488308506084	-0.120333685058029	0.0356425483366194	0.431411656522983
AKTIP	69	0.0126662528977562	0.0480446812025387	0.263634861981079	68	0.792858567217846	-0.0832054157623612	0.108537921557874	0.866805047744071
ALAD	69	0.0883411726916908	0.0454605469789882	1.94324922514729	68	0.0561267444329732	-0.00237393641068699	0.179056281794069	0.125176296502334
ALAS1	70	-0.133931352569357	0.0542627016635388	-2.46820280714756	69	0.0160618460412053	-0.242182480464366	-0.0256802246743485	0.0445633356955617
ALCAM	68	-0.0757944749903023	0.130404217492886	-0.581227175374425	67	0.563037628321695	-0.336082382506235	0.18449343252563	0.69361308424436
ALDH16A1	69	-0.35766896375913	0.0686655039322221	-5.20885951863362	68	1.92436588710488e-06	-0.494688843516852	-0.220649084001407	1.63988797955284e-05
ALDH18A1	70	0.102995470359648	0.0521359036204054	1.97551904172496	69	0.0522103184233284	-0.00101281153035233	0.207003752249649	0.11804395915465
ALDH1A3	56	-0.269740817580979	0.1360012360835	-1.98337033801198	55	0.0523275600403909	-0.542293385274992	0.00281175011303458	0.118212642511045
ALDH1B1	70	-0.657878967984764	0.0673916009138778	-9.76203204944623	69	1.24720868131548e-14	-0.792321533244642	-0.523436402724887	1.71835919061738e-12
ALDH2	69	0.147560988876074	0.0522960190629937	2.82164859811467	68	0.00625816620811264	0.0432059075984076	0.251916070153741	0.0199366139348491
ALDH3A2	57	-0.452503714586278	0.080309102572536	-5.63452585188051	56	5.92857468689459e-07	-0.613382178953712	-0.291625250218843	5.74520068609418e-06
ALDH3B1	64	0.278957839804851	0.0845342706928244	3.29993785382631	63	0.00159439880738049	0.110029579446957	0.447886100162745	0.00610090639042852
ALDH4A1	69	-0.474833207757554	0.0730915751007977	-6.49641503966402	68	1.13159920303297e-08	-0.620685175020467	-0.328981240494642	1.84567158247627e-07
ALDH5A1	55	-0.297359311694909	0.114393555558885	-2.59944111573524	54	0.0120160872293408	-0.526704581937107	-0.0680140414527104	0.0347692208350165
ALDH6A1	69	0.157380561309907	0.0644559228936682	2.44167726167749	68	0.0172259182060342	0.0287607697289549	0.28600035289086	0.0473038185749345
ALDH7A1	68	-0.00333789846135883	0.0535504604171732	-0.0623318349712711	67	0.950484155513922	-0.110225064815938	0.10354926789322	0.970592957544474
ALDH9A1	70	-0.148997378356684	0.0495148689493364	-3.00914415241891	69	0.00365574441355662	-0.247776839146799	-0.05021791756657	0.012572360090157
ALDOA	70	1.09328600328679	0.0755822983190673	14.4648420013842	69	1.40962852718854e-22	0.9425034437919	1.24406856278168	1.83931647000566e-19
ALDOC	66	2.26207277080801	0.160932890748258	14.056000363198	65	2.22650450432297e-21	1.94066759398756	2.58347794762847	2.14731838760401e-18
ALG1	70	-0.414754789790752	0.0554184206218474	-7.48406008574061	69	1.75225839075898e-10	-0.525311513922791	-0.304198065658713	5.17557864498211e-09
ALG10	68	-0.230754889985207	0.0618448786651056	-3.7311883371097	67	0.00039485403789564	-0.354197784454438	-0.107311995515975	0.001801450487166
ALG10B	69	-0.0244343094125758	0.0487691754998405	-0.501019530515863	68	0.6179753833584	-0.121751683933957	0.0728830651088054	0.736312507582104
ALG11	70	-0.0706399019874947	0.0449594300386477	-1.57119211535315	69	0.120712723362846	-0.160331510808929	0.0190517068339401	0.228878504969198
ALG12	69	-0.116063745842323	0.0571849777129354	-2.02961949945937	68	0.0463109263234071	-0.230174592212994	-0.00195289947165254	0.107104268132498
ALG13	70	-0.00770209360852187	0.0468611455449698	-0.164359908810395	69	0.869928352715279	-0.101187521060132	0.0857833338430885	0.91828070428906
ALG14	70	-0.240765997339202	0.0545968330873217	-4.40988943358899	69	3.71548709868375e-05	-0.349683699186129	-0.131848295492274	0.000224019937001911
ALG2	70	-0.100756936967578	0.0533693054286096	-1.88791921045998	69	0.0632422281611594	-0.20722578813984	0.00571191420468455	0.137695239995174
ALG3	70	-0.3065954293601	0.0480858491684414	-6.37600114507945	69	1.76237110748387e-08	-0.402524073690221	-0.21066678502998	2.73568340841198e-07
ALG5	70	-0.180623302434625	0.0470227299400623	-3.84119132736141	69	0.00026878456759214	-0.274431081934378	-0.0868155229348717	0.00128439881049738
ALG6	70	-0.491271309772893	0.0528775366367779	-9.29073744768963	69	8.84912707295834e-14	-0.596759109048598	-0.385783510497188	8.49746046460441e-12
ALG8	70	-0.301530457016235	0.0460810328590836	-6.54348304080594	69	8.8465026434675e-09	-0.393459602241869	-0.2096013117906	1.50025322352749e-07
ALG9	69	0.0954729571856121	0.0459693400464045	2.07688335506308	68	0.0415932177289129	0.00374256732467813	0.187203347046546	0.0981824790531815
ALKBH1	65	-0.117138728822976	0.0531764874543726	-2.20282937874536	64	0.0312145130586159	-0.223370974723029	-0.0109064829229231	0.0776930350837317
ALKBH2	68	-0.362116938036633	0.0616866783056258	-5.87026158618121	67	1.48904355489457e-07	-0.485244063266733	-0.238989812806533	1.71406144964563e-06
ALKBH3	70	-0.146163605799481	0.0563717988437446	-2.59284977235919	69	0.0116115985177756	-0.258622267444157	-0.0337049441548053	0.0337529128975623
ALKBH4	69	-0.125654201815879	0.0545489986289817	-2.30351069632871	68	0.0243136439495823	-0.234505033820622	-0.0168033698111373	0.0632194643171533
ALKBH5	70	0.574052325221035	0.0600975448149282	9.55200960353443	69	2.9808157729985e-14	0.454161003733292	0.693943646708778	3.51090350384924e-12
ALKBH6	68	-0.0859367838346566	0.0596543153678329	-1.44057950048985	67	0.154360502364152	-0.205007295662511	0.0331337279931976	0.276819130776566
ALKBH7	70	0.217396676787149	0.0730682990079699	2.97525301312182	69	0.00403254208671634	0.0716294086915143	0.363163944882783	0.0136731654795998
ALKBH8	65	-0.542581926845269	0.0953417005272467	-5.69091933377264	64	3.39654262797249e-07	-0.733048869281627	-0.352114984408912	3.52065927914419e-06
ALMS1	69	-0.0279762792477931	0.0491576121511807	-0.569113877251688	68	0.571153952971365	-0.126068767038752	0.0701162085431661	0.699808715466793
ALOX12B	19	0.978092424938902	0.26180817173542	3.73591251356107	18	0.00151268189607994	0.428053866624747	1.52813098325306	0.00583553214240788
ALOX12P2	20	-0.15765804965077	0.140974048168811	-1.11834803425649	19	0.277359392705515	-0.452720123515406	0.137404024213867	0.426088156860481
ALOX5	16	2.26630594711248	0.468640065637347	4.8359201726176	15	0.000217994032498839	1.26742329217865	3.2651886020463	0.00106815631298636
ALOXE3	24	2.30291172711095	0.479361011996392	4.80412814033421	23	7.58676842944136e-05	1.31127792150644	3.29454553271546	0.000420724243254671
ALPK1	66	0.125492378221912	0.0717003267190738	1.75023439870223	65	0.084796741909254	-0.0177030623128428	0.268687818756666	0.174211478098645
ALPK3	51	0.824026006328961	0.165145811896658	4.98968757890515	50	7.70263633183599e-06	0.49232088101865	1.15573113163927	5.59462603512724e-05
ALS2	70	-0.0553501189835056	0.0432400633154818	-1.28006563218162	69	0.204808976572647	-0.141611685043673	0.0309114470766615	0.340687867891598
ALS2CL	57	0.30423289393677	0.118776021004986	2.56139994725029	56	0.0131454980479544	0.066295932236852	0.542169855636688	0.0375910065359964
ALYREF	70	-0.584472982238191	0.0781398312458674	-7.47983420131973	69	1.78363793353146e-10	-0.740357680319388	-0.428588284156995	5.24035187305893e-09
AMBRA1	NA	NA	NA	NA	NA	NA	NA	NA	NA
AMD1	70	-0.565996485951534	0.0922187698503412	-6.13754105449543	69	4.66989870151728e-08	-0.749967898051302	-0.382025073851767	6.36679121063653e-07
AMDHD1	31	-0.2206072893086	0.152360191780408	-1.44793260451229	30	0.158006943665095	-0.531768312418502	0.090553733801303	0.281677250211294
AMDHD2	70	-0.288511455506181	0.0753441065583804	-3.82925047074024	69	0.000279752749544556	-0.438818835440173	-0.138204075572189	0.00133136140107216
AMER1	67	-0.292732073368359	0.0630170048897668	-4.64528699642936	66	1.67013719686195e-05	-0.418549583120212	-0.166914563616507	0.00011062103105641
AMFR	70	0.00791776827604708	0.0392171964732803	0.20189531603672	69	0.84059262697218	-0.0703183980216833	0.0861539345737774	0.899340454902662
AMH	44	-0.0467671557255082	0.091543806549331	-0.51087187094745	43	0.612053853572064	-0.231382836281165	0.137848524830149	0.731891028567953
AMIGO3	63	-0.191593812733636	0.0933829807970191	-2.05169947562599	62	0.0444286941897918	-0.378263731522553	-0.00492389394472018	0.103596898404075
AMMECR1	70	-0.273629144243993	0.0476547482422334	-5.74190724611767	69	2.30247705829443e-07	-0.368697765757926	-0.17856052273006	2.49992883539339e-06
AMMECR1L	69	-0.0541332083024106	0.045920804933996	-1.17883840190124	68	0.242570981995726	-0.14576674785445	0.0375003312496287	0.385769251694092
AMN1	69	0.185931900896144	0.0658029176596455	2.8255874892637	68	0.00618984315551614	0.0546242231088852	0.317239578683403	0.019744478124196
AMOT	64	0.287090298655933	0.086308781832221	3.32631619357134	63	0.00147154227924245	0.114615960745028	0.459564636566837	0.00569068180581521
AMOTL1	70	-0.0512072160646252	0.0635716325433768	-0.805504185057462	69	0.423296005357861	-0.178029152937917	0.0756147208086664	0.575058904349055
AMOTL2	68	0.0494124207465765	0.0845856621471487	0.584170171306535	67	0.561067620170699	-0.119421267529894	0.218246109023047	0.692074851637894
AMPD2	70	0.329211968743864	0.0673403421306174	4.88877778650582	69	6.35759405068545e-06	0.194871661958636	0.463552275529092	4.71968377618155e-05
AMPD3	63	1.36529589559452	0.159823178011641	8.5425400281746	62	4.55230489293329e-12	1.04581391498749	1.68477787620155	2.32671030265083e-10
AMT	53	0.578880559733399	0.0977336829677633	5.92304047238595	52	2.5465089241389e-07	0.382763577059225	0.774997542407573	2.7222487207349e-06
AMZ2	70	0.094272614066617	0.0418094491997775	2.25481597751158	69	0.0273212199047508	0.0108650450773618	0.177680183055872	0.0696911475297673
AMZ2P1	69	0.356517558394938	0.0670856899561002	5.31436076200806	68	1.28026884379456e-06	0.222650148344004	0.490384968445871	1.13960367147074e-05
ANAPC1	70	-0.349840382575167	0.0555341506507698	-6.29955403072897	69	2.41087968607055e-08	-0.460627981797795	-0.239052783352539	3.58913645613537e-07
ANAPC10	67	-0.174729975043979	0.0586633664029705	-2.97851940244485	66	0.00404893573236711	-0.291855165100113	-0.0576047849878456	0.0137198082276501
ANAPC11	70	-0.104087872160208	0.0430422567699292	-2.41827171648042	69	0.0182381133070447	-0.189954824959246	-0.0182209193611689	0.0496452809938918
ANAPC13	70	-0.386935366808518	0.0540065562608411	-7.16459988560827	69	6.68762836543395e-10	-0.494675498606814	-0.279195235010222	1.59168425324094e-08
ANAPC15	69	-0.232926001718724	0.0516091714070303	-4.51326761055098	68	2.60030473082012e-05	-0.33591049983829	-0.129941503599157	0.000163677524231135
ANAPC16	70	0.343586312213495	0.0410413919050742	8.3717022319366	69	4.17847166304999e-12	0.261710975602848	0.425461648824142	2.14552913031886e-10
ANAPC2	61	-0.261749343918844	0.0469551451928837	-5.57445500048234	60	6.23081000136228e-07	-0.355673618580533	-0.167825069257156	5.99193448385017e-06
ANAPC4	70	-0.204964176858382	0.0480989635061342	-4.26130132372275	69	6.31440502596774e-05	-0.300918983576354	-0.109009370140409	0.000357977407590052
ANAPC5	70	-0.25710652052829	0.0382333729625399	-6.72466226770513	69	4.18120107244591e-09	-0.333380012623994	-0.180833028432586	7.76778912805655e-08
ANAPC7	70	-0.596259445505508	0.0625980531537221	-9.5252075019214	69	3.33213461807303e-14	-0.721139144639166	-0.471379746371851	3.86981204702073e-12
ANG	60	1.51866803576082	0.16071562734789	9.4494111171496	59	2.05331479407561e-13	1.19707680825114	1.84025926327051	1.71865106628092e-11
ANGEL1	67	-0.216553341517024	0.0694421622227106	-3.11847060324112	66	0.00269368873836978	-0.355199091786002	-0.0779075912480457	0.00963421534900329
ANGEL2	70	-0.109562460910532	0.0490984353672954	-2.23148579157191	69	0.0289003344233623	-0.207511159435457	-0.0116137623856066	0.072873390721726
ANGPTL4	62	3.94636831680194	0.287025260692804	13.7492020990641	61	2.39478414758356e-20	3.37242583603128	4.52031079757259	1.96744822080365e-17
ANK2	49	-0.0313725708417545	0.131768481549074	-0.238088581373465	48	0.812825847743332	-0.29631085980369	0.233565718120181	0.880018927284091
ANK3	60	-0.0848844493213037	0.138488449650978	-0.612935226982695	59	0.542274733640485	-0.36199919699152	0.192230298348913	0.676417123512148
ANKDD1A	55	0.175691609389697	0.0803605039171648	2.18629302736577	54	0.0331478162666442	0.014578499497818	0.336804719281576	0.0816234698294391
ANKEF1	62	-0.264722540606542	0.0811238011330319	-3.26319202144428	61	0.0018072364292634	-0.426939606656592	-0.102505474556492	0.006811914778916
ANKFY1	70	-0.153820567934984	0.0480440464200979	-3.20165721658776	69	0.00206719811804562	-0.249665818063957	-0.05797531780601	0.00764625456969952
ANKH	69	-0.0108023378267958	0.0537087449649935	-0.201128099973972	68	0.841198816511638	-0.117976469750529	0.0963717940969378	0.89969316182831
ANKHD1	70	0.000777299999102028	0.0406106524319555	0.0191402982358981	69	0.984784424430839	-0.0802387348745413	0.0817933348727453	0.991241357483913
ANKHD1-EIF4EBP3	63	0.174066197520973	0.0709713218259859	2.45262724495627	62	0.01700930746231	0.0321965466646173	0.315935848377328	0.0467998583638006
ANKIB1	69	0.086530462333119	0.0407147181525133	2.12528702787489	68	0.0371986063506929	0.00528550720785596	0.167775417458382	0.0897280867845879
ANKLE1	65	-0.181961933103122	0.10111685586397	-1.7995212721795	64	0.0766503320114078	-0.383966074613942	0.0200422084076988	0.160463975976406
ANKLE2	70	0.0393775377930606	0.0391283194553147	1.00636925738736	69	0.317754192190471	-0.0386813237051708	0.117436399291292	0.469613131532348
ANKMY1	66	0.0830036645611825	0.0584600086379776	1.419836679724	65	0.160433763510659	-0.0337490348146466	0.199756363937012	0.284943057786019
ANKMY2	70	0.143759611477174	0.0473661146429663	3.03507291152751	69	0.00338984792928244	0.0492667982387443	0.238252424715603	0.0117633780056411
ANKRA2	69	0.386300463889503	0.0566636664015033	6.81742796437286	68	3.02003006972632e-09	0.273229878044398	0.499371049734608	5.86807480848402e-08
ANKRD10	70	0.261529913012427	0.0454196641790498	5.7580767656371	69	2.1584145635551e-07	0.170920162202721	0.352139663822133	2.36317630053205e-06
ANKRD11	70	0.0724117525066468	0.0454017935991196	1.59490951273896	69	0.115303070365977	-0.018162347471562	0.162985852484856	0.221020800800044
ANKRD12	70	0.569363802708887	0.0645682083105768	8.81802078153097	69	6.40003633784725e-13	0.440553751578013	0.698173853839762	4.39522000142811e-11
ANKRD13A	70	0.15326767114919	0.0522940962287831	2.93087905140677	69	0.00458040919165822	0.0489438036404025	0.257591538657977	0.0152419196953739
ANKRD13B	66	-0.0720668830364823	0.0604193265553625	-1.19277865453278	65	0.237292040080515	-0.192732610499712	0.0485988444267479	0.379636112130859
ANKRD13C	70	-0.15436460842306	0.0454229670091408	-3.39838232918595	69	0.00112947895382885	-0.244980948198513	-0.0637482686476077	0.00451832320177303
ANKRD13D	69	-0.112954065990089	0.0518634067384483	-2.17791450838789	68	0.0328843642461171	-0.216445882814772	-0.00946224916540597	0.0811120835880541
ANKRD16	66	0.00168280239380963	0.0624642150544739	0.0269402631945682	65	0.978589921517397	-0.123066849409431	0.12643245419705	0.987626844403742
ANKRD17	70	-0.0897032588100602	0.0431714992066035	-2.07783515649462	69	0.0414474093837979	-0.17582804321558	-0.0035784744045408	0.097915964392133
ANKRD18A	55	-0.194443865430658	0.0764480049513239	-2.54347861078212	54	0.013871675029722	-0.347712887180865	-0.0411748436804507	0.0393832708958522
ANKRD19P	28	0.368711361811375	0.166717626944945	2.21159195082074	27	0.0356460323683333	0.0266350472105605	0.71078767641219	0.0867281221886991
ANKRD20A1	39	0.0734199786233701	0.177824832687197	0.412878097585615	38	0.682016385268855	-0.286567574867213	0.433407532113953	0.784719077153576
ANKRD20A4-ANKRD20A20P	49	0.0881673043797009	0.112744181966365	0.782012010216222	48	0.438048217659599	-0.138520066601785	0.314854675361186	0.587690091411474
ANKRD22	20	0.64985864117407	0.520134143928996	1.24940584800905	19	0.226689734469294	-0.438794633588393	1.73851191593653	0.367226443438098
ANKRD23	56	-0.102463833763174	0.0802343440769975	-1.27705703763022	55	0.206947257592329	-0.263257052451308	0.0583293849249591	0.343189598378666
ANKRD24	39	0.74016958314059	0.185877252178674	3.98203424284056	38	0.000297841078905742	0.363880758626089	1.11645840765509	0.00140508524293644
ANKRD26	69	0.00589453385342962	0.0483157871275425	0.122000161931946	68	0.903258717397102	-0.0905181182571595	0.102307185964019	0.940087499146179
ANKRD27	70	-0.0321048228035185	0.0415046553105411	-0.773523417151827	69	0.441854762866293	-0.114904344620889	0.0506946990138517	0.591196435409687
ANKRD28	70	0.0505214104183845	0.0445247635907069	1.13468116041674	69	0.260435427707661	-0.0383030625656299	0.139345883402399	0.406800834970167
ANKRD29	41	-0.236998499301671	0.128371939218489	-1.84618617389817	40	0.0722744616180011	-0.496447866462053	0.0224508678587097	0.153151710700277
ANKRD33B	61	0.277373496792735	0.0883708810293938	3.13874314210441	60	0.0026311673812042	0.100605415940157	0.454141577645313	0.00945021937336005
ANKRD36	68	0.1297128311472	0.0518371904967161	2.50231214123029	67	0.0147855404592482	0.0262453658665543	0.233180296427846	0.041605081627178
ANKRD36B	69	0.107746230004274	0.0628054028104183	1.71555670663417	68	0.0907967045614197	-0.0175800000298525	0.2330724600384	0.183429189488289
ANKRD36C	68	0.062602826665054	0.0662294090086508	0.945242115279586	67	0.347931751333709	-0.0695916269983713	0.194797280328479	0.500994619155102
ANKRD37	69	3.29289569342787	0.226073067100806	14.5656257760221	68	1.36811550511714e-22	2.84177391179515	3.74401747506058	1.83931647000566e-19
ANKRD39	68	-0.32820719030579	0.0614245346856943	-5.34325887831641	67	1.17921201377958e-06	-0.450811074680553	-0.205603305931028	1.0615779581842e-05
ANKRD40	70	-0.215898254440032	0.0449962940958905	-4.79813413033387	69	8.93469451799986e-06	-0.305663405043446	-0.126133103836619	6.38702525937071e-05
ANKRD42	69	-0.0794290724805588	0.0545207497740314	-1.45685950412941	68	0.149757553961752	-0.188223534772899	0.0293653898117816	0.270382717074685
ANKRD44	66	-0.242746310122749	0.0765618043814316	-3.17059285741732	65	0.00232123265380234	-0.395650791987799	-0.0898418282576986	0.00845894245550247
ANKRD46	67	0.00462796939006903	0.0543303509113673	0.0851820264812747	66	0.932374552223666	-0.10384607610876	0.113102014888898	0.958374309670289
ANKRD49	69	-0.0787379014416099	0.0556915195161031	-1.41382210659278	68	0.161976107375417	-0.189868598380112	0.0323927954968927	0.287091810931002
ANKRD50	69	-0.031625188719951	0.0656885453111124	-0.481441453303137	68	0.631748509912406	-0.162704640039097	0.0994542625991955	0.746706743053072
ANKRD52	70	-0.441635389171159	0.0710669276166438	-6.21435883022088	69	3.41496298652179e-08	-0.58341003058574	-0.299860747756577	4.87216761116166e-07
ANKRD54	70	-0.19935744953653	0.0474808166576509	-4.1986946217448	69	7.87412994520506e-05	-0.294079087033258	-0.104635812039802	0.00043502851916448
ANKRD6	56	0.136460225747383	0.0701408546325486	1.94551700948421	55	0.0568308089404129	-0.00410518807441856	0.277025639569184	0.126492173782484
ANKRD9	70	0.0928334918378016	0.092091501118753	1.00805710309893	69	0.316949105790139	-0.0908840260893977	0.276551009765001	0.468829358804806
ANKS1A	69	-0.0218263588985061	0.0456161925427982	-0.478478313989668	68	0.633844663947847	-0.112852053887782	0.0691993360907694	0.747988633063315
ANKS3	67	-0.0516247619186096	0.0579501846047121	-0.890847238378112	66	0.376247203191219	-0.167326038572096	0.0640765147348767	0.53003400617221
ANKS6	69	-0.0741340317914949	0.0474742568282986	-1.56156276568199	68	0.123033315657232	-0.168867436335086	0.020599372752096	0.232285727117944
ANKZF1	70	1.30528433833398	0.104175793674559	12.5296318107413	69	1.91207610314005e-19	1.09745931637776	1.5131093602902	1.3254272537454e-16
ANLN	70	-0.35993741792184	0.141959517094582	-2.53549339479669	69	0.0134983992351008	-0.643138905680514	-0.0767359301631668	0.0384860529348336
ANO1	30	-0.145141193887376	0.186245711356886	-0.779299522281372	29	0.442116816247824	-0.526056443474571	0.235774055699819	0.591355235046384
ANO10	70	-0.114214324764201	0.0438328841362644	-2.60567669718332	69	0.0112238126265038	-0.201658536002768	-0.0267701135256332	0.0327846473111808
ANO6	69	0.600389263450717	0.0712242091426217	8.42956728727557	68	3.63756106535699e-12	0.458263566940954	0.74251495996048	1.9396245084555e-10
ANO8	67	0.214695732824183	0.0711606199251152	3.01705821351914	66	0.0036232291720816	0.0726189710511088	0.356772494597257	0.0124702047315926
ANO9	24	0.393866585628802	0.16211485012978	2.42955278503786	23	0.0233352157993702	0.0585064671458894	0.729226704111714	0.0610259086137266
ANP32A	70	-0.00298850159699276	0.0445353726088344	-0.0671039989547529	69	0.94669297605443	-0.0918341389930795	0.085857135799094	0.968129193580493
ANP32B	70	-0.0802022381663744	0.0495549247622565	-1.61845141630526	69	0.110127827752601	-0.179061608116822	0.0186571317840733	0.213312563325899
ANP32E	70	-0.0966465107440157	0.0560763522895534	-1.7234806972639	69	0.0892802116018827	-0.208515772639999	0.0152227511519671	0.181128711262847
ANTXR1	68	0.233818023748211	0.117548225308739	1.98912423504558	67	0.0507728649772268	-0.000809215968879673	0.468445263465301	0.115287510587045
ANTXR2	60	0.087840938862452	0.0653343853609866	1.34448251678059	59	0.183938901108231	-0.0428928642751199	0.218574742000024	0.315165510920963
ANXA1	68	0.0388849993138389	0.0887447836696188	0.438166590822971	67	0.662675015838818	-0.138250330266888	0.216020328894566	0.769282876352138
ANXA10	17	-0.411481466285661	0.154870837381655	-2.65693317891495	16	0.0172237937819095	-0.739792975145865	-0.0831699574254577	0.0473038185749345
ANXA11	70	-0.0554902478027972	0.0382562216172283	-1.45048950097591	69	0.151452939940559	-0.131809321717413	0.0208288261118188	0.27275546916956
ANXA2	70	0.206043814315903	0.0671809225037354	3.06699888356618	69	0.00308717073459223	0.0720215409844009	0.340066087647404	0.0108302421690218
ANXA2P2	28	0.244086738214862	0.150724057934553	1.61942785750134	27	0.116978526536341	-0.0651734834229972	0.553346959852721	0.223344609711578
ANXA3	55	0.163260928336478	0.094902897704633	1.72029445133062	54	0.0911054681853769	-0.0270079256605709	0.353529782333526	0.183853549418342
ANXA4	70	0.0663224453533056	0.0541908111081034	1.22386884412934	69	0.225164459301578	-0.0417852648077476	0.174430155514359	0.365315830619339
ANXA5	69	0.186025370362579	0.0579030116961789	3.21270629822619	68	0.00201063352144755	0.0704817094866349	0.301569031238523	0.00746191614066415
ANXA6	67	-0.100124651589107	0.0867861765101347	-1.15369354447151	66	0.25278663567145	-0.273398843666157	0.0731495404879425	0.397484451156455
ANXA7	70	-0.367202654100154	0.0499287282936146	-7.35453648930843	69	3.01794844873504e-10	-0.466807741691636	-0.267597566508673	8.1046165241938e-09
ANXA9	36	-0.153813164680228	0.148282226551644	-1.03730007471028	35	0.306709713281679	-0.454842088421335	0.147215759060879	0.457589108152691
AOC2	48	0.441633692571554	0.0927502401106731	4.76153691941477	47	1.87480343923549e-05	0.25504427688275	0.628223108260359	0.000122566725284767
AOC3	41	0.54407643831881	0.133770114245976	4.0672495600801	40	0.000217032575512003	0.27371695245781	0.814435924179811	0.00106391526850989
AP1AR	70	-0.12290831908868	0.0520513106392295	-2.36129153289845	69	0.021040872551027	-0.226747842598733	-0.0190687955786263	0.0560096765782889
AP1B1	70	-0.331056970907926	0.0641230071872882	-5.1628422531867	69	2.23699102684592e-06	-0.458978870099095	-0.203135071716757	1.87744740664003e-05
AP1G1	70	-0.137624252924996	0.0372311820105593	-3.69647820705677	69	0.000434405785004422	-0.211898428775985	-0.0633500770740081	0.00195853437458701
AP1G2	68	0.224345318671145	0.0517332822719194	4.336576161782	67	4.98242671685502e-05	0.121085255075245	0.327605382267045	0.000289851008217356
AP1M1	70	-0.130636351975468	0.0397560653920839	-3.28594770853455	69	0.00159976040143383	-0.209947532352109	-0.0513251715988265	0.00611509309402124
AP1M2	33	-0.255436754107801	0.0745085706438876	-3.42828686552929	32	0.00168967657510599	-0.407205746025888	-0.103667762189714	0.00641787770359608
AP1S1	70	-0.150987946139326	0.0481595119420289	-3.13516354403829	69	0.00252326175898425	-0.247063543681879	-0.0549123485967729	0.00910393499313414
AP1S2	70	0.155818875192351	0.060928877502884	2.55738955940843	69	0.0127476420829285	0.0342690903703416	0.27736866001436	0.0365948229174996
AP1S3	70	-0.145538392038994	0.0699620898316028	-2.08024649334092	69	0.0412188193857259	-0.285108942379871	-0.00596784169811762	0.0974854303885458
AP2A1	67	0.0711679529599744	0.0401363005557768	1.77315676767652	66	0.0808165684020457	-0.0089667566380655	0.151302662558014	0.167383111138579
AP2A2	70	0.0280949829121291	0.0393450059520943	0.714067318895236	69	0.477594200029922	-0.0503961563193685	0.106586122143627	0.621913623170953
AP2B1	70	0.0414939446353808	0.0346486298181088	1.19756379554421	69	0.235184723795315	-0.0276281805600032	0.110616069830765	0.377432176474293
AP2M1	70	-0.01626450281714	0.036271819614649	-0.448406035041354	69	0.655265149061647	-0.0886248030549808	0.0560957974207009	0.763687039804194
AP2S1	70	-0.19441073366212	0.047076609489989	-4.1296672757086	69	0.000100247011958448	-0.288325999922968	-0.100495467401273	0.000537640043341946
AP3B1	70	-0.0296460629222422	0.0401526602026732	-0.73833371867771	69	0.462815617060271	-0.109748428297924	0.0504563024534395	0.609138575896965
AP3D1	70	-0.104975788415637	0.0357679352446224	-2.93491328749314	69	0.00452788982947834	-0.176330866839749	-0.0336207099915246	0.0150965958511181
AP3M1	70	-0.233540769177774	0.0390911218915032	-5.9742662240793	69	9.05277616603924e-08	-0.311525423566627	-0.155556114788922	1.11560378286157e-06
AP3M2	70	-0.0963693488764709	0.047545101315514	-2.02690384939879	69	0.0465382008604175	-0.191219230756665	-0.00151946699627721	0.107479815326803
AP3S1	70	0.345948391154322	0.0557651894901554	6.20366207516241	69	3.56728048736732e-08	0.23469988205835	0.457196900250294	5.04330247105047e-07
AP3S2	70	-0.106301578083573	0.0448821649952563	-2.36845923307861	69	0.0206683864275288	-0.195839047360946	-0.0167641088061994	0.0551438715101569
AP4B1	70	-0.407020898332493	0.0739664497199549	-5.50277727095892	69	5.94675132537204e-07	-0.554579928073078	-0.259461868591909	5.7552721596598e-06
AP4E1	70	-0.0738650081605842	0.0588003070760409	-1.25620106141727	69	0.213279751798237	-0.19116841116883	0.0434383948476613	0.350884184112475
AP4M1	69	0.0102216257537573	0.0513485138117649	0.199063711780015	68	0.8428069246802	-0.0922427382327159	0.11268598974023	0.900970756783432
AP4S1	69	-0.199687817749942	0.0571679588940898	-3.49300240227024	68	0.000844447292405675	-0.313764703596357	-0.0856109319035272	0.00349795141739359
AP5B1	70	-0.0673780740732712	0.0605967652791875	-1.11190875887253	69	0.270036586528671	-0.188265313137316	0.0535091649907733	0.417942475745115
AP5M1	69	-0.203040962342043	0.0541064726574085	-3.75261872322852	68	0.000364447161750188	-0.31100874751916	-0.0950731771649262	0.00167651740811752
AP5S1	70	-0.316917142607655	0.0574414072836679	-5.51722455270977	69	5.61751742478355e-07	-0.431509614705515	-0.202324670509794	5.49174841412731e-06
AP5Z1	70	-0.0215304208561826	0.0546257832236232	-0.394143929580705	69	0.69469029062954	-0.130505876644792	0.0874450349324264	0.795294179745275
APAF1	68	0.527918457068804	0.0559653663123165	9.43294919437743	67	6.4594769720809e-14	0.416211118373335	0.639625795764274	6.57266597223388e-12
APBA3	67	0.0896699814053914	0.0638941220896013	1.40341518864041	66	0.165180550369245	-0.0378987493389016	0.217238712149684	0.291212443831712
APBB1	65	0.210376507034922	0.0492976375626181	4.2674764438296	64	6.66320798769482e-05	0.111893154588274	0.30885985948157	0.000375230463526394
APBB2	68	0.0541727404031531	0.0421676893319568	1.284697863729	67	0.203321861885672	-0.0299943197733762	0.138339800579682	0.338727579822349
APBB3	61	0.431724372751804	0.0822256139646862	5.25048524340869	60	2.09958410897246e-06	0.267248656224457	0.596200089279151	1.77285781139045e-05
APC	70	-0.137159279161657	0.0482162891153076	-2.84466684762168	69	0.00584654776878154	-0.233348144065725	-0.0409704142575894	0.0187736135794893
APC2	49	-0.00487731000327801	0.167400136979779	-0.0291356392609593	48	0.976877216897636	-0.341457843845879	0.331703223839323	0.986707819553907
APEH	70	-0.392026377989562	0.0460647088978842	-8.51034093927745	69	2.3316040520396e-12	-0.483922957803646	-0.300129798175479	1.31602140158632e-10
APEX1	70	-0.172994744894288	0.0384786065320444	-4.49586823655428	69	2.72283896190987e-05	-0.249757464575106	-0.096232025213471	0.000170664068530898
APEX2	70	-0.194965854884566	0.0454461224176228	-4.29004378179828	69	5.70272815824972e-05	-0.285628388436005	-0.104303321333127	0.000326783559819931
APH1A	70	-0.0682391238755767	0.0368696506908073	-1.8508210031019	69	0.068475950565607	-0.141792064477808	0.00531381672665471	0.146586554855557
APH1B	70	0.199799315019369	0.0629817821711133	3.1723350488327	69	0.00225786639481498	0.0741540974418239	0.325444532596914	0.00825514955823075
API5	70	-0.244388540641234	0.0405000840498067	-6.03427243115561	69	7.10173290837279e-08	-0.325183997627853	-0.163593083654614	9.06912143773893e-07
APIP	70	-0.263591978729257	0.049337741730523	-5.34260323808425	69	1.11435901033999e-06	-0.362018080386309	-0.165165877072205	1.01099024815385e-05
APLP1	62	0.499944231239546	0.0987114981038059	5.06470108187194	61	4.04716550886144e-06	0.302558391520992	0.697330070958099	3.17447755719818e-05
APLP2	70	0.174235228348064	0.0391523539850305	4.45018525360393	69	3.21293253851188e-05	0.0961284192749719	0.252342037421156	0.000197312484964758
APMAP	70	-0.0842878535803899	0.0388327437764598	-2.17053561977469	69	0.0334102891036922	-0.161757057733272	-0.00681864942750737	0.0821353244927518
APOBEC3B	63	-0.549374379869345	0.131853271530695	-4.16655858054649	62	9.74696561165807e-05	-0.812945314086873	-0.285803445651816	0.000525029604657114
APOBEC3C	66	0.102989599093931	0.0737656092357932	1.39617363919171	65	0.167412409093811	-0.0443304954465032	0.250309693634365	0.294002221401228
APOBEC3F	67	0.128001336498925	0.0826867979288447	1.54802628358006	66	0.126398041250312	-0.037088182162906	0.293090855160756	0.236984308259185
APOL1	67	0.241945402302075	0.129078406617152	1.87440648395737	66	0.0653010531623122	-0.0157679516047887	0.499658756208939	0.14123517562855
APOL2	70	0.0115675957107629	0.0996638630781671	0.116066098117131	69	0.90793729962695	-0.187256370988902	0.210391562410428	0.942745175318307
APOLD1	67	0.672754448756366	0.143743116590065	4.680255059969	66	1.4698735575474e-05	0.385762056703329	0.959746840809404	9.89821956694489e-05
APOO	70	-0.314165713634254	0.0532672429363955	-5.89791579807102	69	1.23168188104859e-07	-0.42043095570562	-0.207900471562888	1.45635221137633e-06
APOOL	70	-0.096232028141271	0.0461173541735669	-2.08667712764035	69	0.040614535959577	-0.188233632406705	-0.00423042387583715	0.096343881580081
APOPT1	69	0.101680065082901	0.0625857038960153	1.62465321556245	68	0.108863077697809	-0.0232077625932657	0.226567892759067	0.211472177028881
APP	69	0.274567122200572	0.0449758154335921	6.10477252171173	68	5.57286694615396e-08	0.184819279837116	0.364314964564028	7.38454806449146e-07
APPBP2	70	0.0446586465268235	0.0420506666250415	1.06201994191999	69	0.291929658980434	-0.0392301380590059	0.128547431112653	0.441597360577195
APPL1	70	0.113179293120977	0.04117557957293	2.74869945474633	69	0.00763009303166789	0.0310362594375768	0.195322326804377	0.0236303921281791
APPL2	69	0.0600039011971882	0.044725144721092	1.34161446701571	68	0.184184316816916	-0.0292437355474543	0.149251537941831	0.315488534025702
APRT	70	-0.187634176806025	0.0545534097584591	-3.43945827835134	69	0.000992889420330169	-0.29646525148213	-0.0788031021299204	0.00403596722040751
APTR	67	-0.0843732051492154	0.0635809636263823	-1.32701991817887	66	0.189074819868484	-0.211316694848351	0.0425702845499207	0.321506911025122
APTX	70	-0.37197565761096	0.0653216826608268	-5.69452044801706	69	2.78158298396849e-07	-0.502288848942266	-0.241662466279653	2.94234972581731e-06
AQP3	52	-0.054068020462958	0.178793249904846	-0.302405266931122	51	0.763573060340819	-0.413010447213951	0.304874406288035	0.845483832899718
AQR	70	-0.232675562512951	0.0403627781615836	-5.76460722256245	69	2.10278690176662e-07	-0.313197101747392	-0.152154023278509	2.31713954570229e-06
ARAF	70	-0.107296309694653	0.0424149888344498	-2.52967907438198	69	0.0137043525821199	-0.191911897201763	-0.0226807221875425	0.0389930668261394
ARAP1	68	0.235392244725012	0.0764116863684865	3.08057910919359	67	0.00299578547513295	0.0828738803883522	0.387910609061672	0.0105664673889965
ARAP2	48	-0.396427027636451	0.113058131160747	-3.5063999693468	47	0.00101046278557699	-0.623870650499099	-0.168983404773802	0.00409838828116087
ARAP3	66	0.0167447897993575	0.0536667044399819	0.312014497146625	65	0.75602819755652	-0.0904350200561998	0.123924599654915	0.840275452359892
ARC	31	0.35198606039414	0.102112000322463	3.44705871281135	30	0.00169912462723692	0.143445534677751	0.560526586110529	0.0064504505359181
ARCN1	70	-0.0171622155948754	0.0369504525365604	-0.464465640248771	69	0.64377641495178	-0.0908763514688243	0.0565519202790735	0.755888653210904
AREG	37	0.136903515282881	0.18926647459156	0.723337376988296	36	0.474146580678756	-0.246946686422981	0.520753716988743	0.618545961087357
AREL1	70	-0.283207557167196	0.0489398144891008	-5.78685391687107	69	1.92369861675485e-07	-0.380839815698427	-0.185575298635966	2.14959941099289e-06
ARF1	70	-0.0233011985591483	0.0343471239383876	-0.678403193261431	69	0.499785040004643	-0.0918218359821546	0.0452194388638581	0.641267454730622
ARF3	70	-0.176747532368585	0.0411860872290454	-4.29143781941827	69	5.67456761412651e-05	-0.258911528252376	-0.0945835364847942	0.000325590426323213
ARF4	70	-0.0176203578950487	0.0378677030453032	-0.465313617622081	69	0.643172167647865	-0.0931643584659188	0.0579236426758213	0.755525044345512
ARF5	70	0.11248975114846	0.0412886555884776	2.72447115424733	69	0.0081531176783748	0.0301211369862848	0.194858365310635	0.0250435748998429
ARF6	70	0.0092271963876199	0.0411241714094471	0.224374037734417	69	0.823129360410338	-0.0728132808157408	0.0912676735909806	0.887305430580402
ARFGAP1	70	-0.00461975661482268	0.0467179230046172	-0.0988861729654826	69	0.921515370406722	-0.0978194629162168	0.0885799496865714	0.951321913080556
ARFGAP2	69	-0.270450020895471	0.0449868596166368	-6.01175594829594	68	8.11030431719679e-08	-0.360219901583065	-0.180680140207876	1.0123960065507e-06
ARFGAP3	70	0.321826772190308	0.060240274666191	5.34238553814112	69	1.1153056762666e-06	0.201650712440189	0.442002831940426	1.01143542563147e-05
ARFGEF1	70	0.0573779809191104	0.0401560076665335	1.42887663025649	69	0.157551265173572	-0.0227310624642518	0.137487024302473	0.281059587831485
ARFGEF2	70	-0.00264918624547148	0.0425416146387479	-0.0622728184618207	69	0.950525612356496	-0.0875173853203006	0.0822190128293576	0.970592957544474
ARFGEF3	65	1.24386517490402	0.193620344590926	6.42424832747823	64	1.88229944272022e-08	0.857064070835512	1.63066627897252	2.89550390002913e-07
ARFIP1	70	-0.0383669149302336	0.0453766212771866	-0.845521633174633	69	0.400742213967413	-0.128890797500215	0.0521569676397474	0.554158954567992
ARFIP2	69	-0.0437414923586117	0.0598489142078698	-0.730865261927508	68	0.467372340935731	-0.163168141240226	0.0756851565230026	0.612866710016338
ARFRP1	69	-0.294098326032959	0.0598238340891273	-4.91607284138296	68	5.86624795284198e-06	-0.413474928316826	-0.174721723749092	4.40057869766455e-05
ARG2	66	0.433068904462474	0.103007655304454	4.204239997333	65	8.17426379576559e-05	0.227348411199373	0.638789397725575	0.000449594642989517
ARGLU1	70	-0.022731901820497	0.0468157404001875	-0.485561087492828	69	0.628816694128359	-0.116126748486702	0.0706629448457078	0.744510910550054
ARHGAP1	70	-0.0715842397075821	0.0440178648067539	-1.62625424976539	69	0.108454484328916	-0.159397477286626	0.0162289978714619	0.210770752705801
ARHGAP10	67	-0.0649613530359515	0.0592121450514272	-1.09709508040168	66	0.276586545111698	-0.183182215015474	0.0532595089435712	0.425349607852723
ARHGAP11A	70	-0.429065513252012	0.111514536315032	-3.84761957884925	69	0.00026305170329896	-0.651530926191494	-0.20660010031253	0.00126026196167981
ARHGAP11B	63	-0.178281519438965	0.113101430787801	-1.57629764890821	62	0.120046490469313	-0.4043680581195	0.0478050192415707	0.227939875042825
ARHGAP12	70	0.184223719665035	0.0434595791834348	4.23896694644605	69	6.83305100656976e-05	0.0975242314305515	0.270923207899518	0.000384064884569695
ARHGAP17	69	-0.178311624160566	0.0429206580189446	-4.15444758749648	68	9.31627508826969e-05	-0.263958463753895	-0.0926647845672369	0.000505018607057669
ARHGAP18	70	-0.238086576418959	0.0777597778560529	-3.06182171533076	69	0.00313447918361963	-0.393213088732649	-0.082960064105269	0.0109701825893106
ARHGAP19	70	-0.0451323921188361	0.0743957336883564	-0.606652960879392	69	0.546072182051292	-0.193547819943962	0.10328303570629	0.679435334432453
ARHGAP21	70	0.104946538083914	0.0677930958787521	1.54804168069874	69	0.126186955443773	-0.0302969877153275	0.240190063883156	0.236737388420698
ARHGAP22	58	0.329474107365186	0.102890443080451	3.20218377432359	57	0.00223227123599415	0.123439549005435	0.535508665724937	0.00817504384296224
ARHGAP23	64	-0.163634755365254	0.0830925458769366	-1.96930727826782	63	0.0533191885432575	-0.329681958572401	0.00241244784189332	0.120024988864069
ARHGAP26	68	-0.0101123933149663	0.0566017570311487	-0.178658646751926	67	0.85874487920604	-0.123089973201649	0.102865186571716	0.911548597638018
ARHGAP27	65	-0.0299207244759271	0.0896797178974791	-0.333639814859054	64	0.739742060642441	-0.209076556310566	0.149235107358712	0.828591851272121
ARHGAP27P1	61	0.169804261732808	0.0820072975843375	2.07059940681716	60	0.0427069942712779	0.00576524298558229	0.333843280480034	0.100341759021871
ARHGAP27P1-BPTFP1-KPNA2P3	66	0.198088289122892	0.070187015484609	2.82229252455292	65	0.00631972590078916	0.0579151398216826	0.338261438424101	0.0201153910075054
ARHGAP29	66	0.0160670116476783	0.0689344840991357	0.233076548807881	65	0.8164343807563	-0.121604659742151	0.153738683037508	0.882466283763409
ARHGAP31	65	-0.0667238152385851	0.0666678776684418	-1.00083904831081	64	0.320673763900132	-0.199908211447256	0.0664605809700855	0.472776765374019
ARHGAP32	68	0.304965909574166	0.0611705657536476	4.98550088293047	67	4.62438540970976e-06	0.182868949309432	0.427062869838901	3.5629773240077e-05
ARHGAP33	59	0.0814523397355174	0.0968816988049989	0.840740209350195	58	0.403946247463495	-0.112477450656142	0.275382130127176	0.557165956672804
ARHGAP35	70	0.120417820600301	0.042510478511192	2.83266208279913	69	0.00604645572857348	0.0356117364003836	0.205223904800218	0.019345518674631
ARHGAP39	62	-0.0471738388220183	0.057037236143913	-0.827070910360944	61	0.411420596666383	-0.161226841438313	0.066879163794276	0.564037804403814
ARHGAP4	58	0.230075003748834	0.167276344578349	1.37541864827798	57	0.174383254582308	-0.104890098425771	0.56504010592344	0.303100560503428
ARHGAP40	22	0.215917197081213	0.494240560072002	0.436866608134625	21	0.666667248809389	-0.811912314270486	1.24374670843291	0.772381328376155
ARHGAP42	64	-0.0600925152975668	0.0792336633332728	-0.758421518954709	63	0.451026693317524	-0.218428357068885	0.0982433264737514	0.599154037080448
ARHGAP44	44	0.192588318534528	0.121716014247059	1.58227592092863	43	0.120915010553912	-0.0528754179186191	0.438052054987674	0.229203278423079
ARHGAP45	66	0.735713342391814	0.175634367585907	4.18889168733994	65	8.62119269603313e-05	0.384947288869543	1.08647939591408	0.000471033139787563
ARHGAP5	70	0.266038550826351	0.0424490900041236	6.26723802089767	69	2.75161864777796e-08	0.18135493334715	0.350722168305552	4.01027627102568e-07
ARHGAP8	22	-0.104419183878284	0.11038377424913	-0.945964971650776	21	0.354924842916447	-0.333974809040069	0.125136441283502	0.508079500605175
ARHGDIA	70	-0.264362337611466	0.059927667847601	-4.41135700931584	69	3.69591473567439e-05	-0.383914763822107	-0.144809911400825	0.000223082396372053
ARHGEF1	69	-0.0109051389053155	0.0436683607053319	-0.249726317388048	68	0.803551866849686	-0.0980439959792772	0.0762337181686462	0.874173001984293
ARHGEF10	67	0.264558690704626	0.056940734658384	4.64621140369625	66	1.66451612723616e-05	0.150872845896692	0.37824453551256	0.000110413566789332
ARHGEF10L	68	0.0667890975872934	0.0516208750432363	1.2938389272044	67	0.200163545827051	-0.0362466002411022	0.169824795415689	0.335084818984268
ARHGEF11	70	-0.152231737789011	0.0422623345058733	-3.60206646340975	69	0.00059086507550389	-0.236542788243231	-0.0679206873347906	0.00256087712091193
ARHGEF12	69	-0.024959342171844	0.0384597703912769	-0.648972729631925	68	0.518541897903012	-0.101704619097562	0.0517859347538744	0.656936225900086
ARHGEF16	45	0.152500969137403	0.071327491826955	2.13803913794389	44	0.0381058724945253	0.00874985494295508	0.29625208333185	0.0914466807990059
ARHGEF17	69	0.146401443578318	0.0591716669211077	2.47418149928938	68	0.015854883501147	0.0283262206163324	0.264476666540303	0.0440828560820309
ARHGEF18	67	-0.00690025476229808	0.0525679147495653	-0.131263619551414	66	0.895966079723878	-0.111855482929799	0.0980549734052024	0.934822181582082
ARHGEF19	62	0.130509071309886	0.0718011516872536	1.81764593245451	61	0.0740300464105148	-0.0130662050337459	0.274084347653517	0.156068561238396
ARHGEF2	70	0.0956098147566215	0.0485526433468356	1.96919895943941	69	0.0529471860833241	-0.00125005847948516	0.192469687992728	0.119369293800213
ARHGEF25	59	0.346494647084992	0.0823722629870328	4.20644807511891	58	9.10682623898647e-05	0.181608648055239	0.511380646114745	0.000494752925871168
ARHGEF26	63	-0.652667085777329	0.0972070585612623	-6.71419437474288	62	6.7003043999596e-09	-0.846981227095888	-0.45835294445877	1.1834063123114e-07
ARHGEF28	63	0.12398095241217	0.102357207709795	1.21125766505552	62	0.230393319120439	-0.0806281903627808	0.32859009518712	0.371462756558336
ARHGEF3	69	0.0075169046308872	0.0613039540388942	0.122616962457562	68	0.902772094679882	-0.114813231027529	0.129847040289304	0.939845619007328
ARHGEF34P	39	0.232328775955857	0.0902723407813162	2.57364297796012	38	0.0140885077423835	0.0495819761154882	0.415075575796226	0.0399246383741037
ARHGEF35	35	-0.0321377702072754	0.478363282320565	-0.0671827696544212	34	0.946829726715709	-1.00428892416245	0.940013383747895	0.968173005025024
ARHGEF37	60	1.25676588523467	0.136610150526374	9.19965229810681	59	5.31836089035448e-13	0.983409605431455	1.53012216503789	3.7538182125744e-11
ARHGEF39	67	-0.181892326621317	0.0809847003388642	-2.24600851593234	66	0.0280563283108536	-0.343583497797409	-0.0202011554452259	0.0711251970961549
ARHGEF4	40	0.0381772541200028	0.14269196150035	0.267550138904701	39	0.790455517537679	-0.250444480768989	0.326798989008995	0.86510184971486
ARHGEF40	68	0.0203139341832056	0.0926182980272899	0.21932959918158	67	0.827060123999071	-0.16455296241487	0.205180830781281	0.889625044639094
ARHGEF5	46	0.228929068444259	0.0678356221152098	3.37476183317746	45	0.00152970870194794	0.0923011120551745	0.365557024833344	0.00588994938840638
ARHGEF7	70	0.213360482527173	0.0486429496781791	4.38625708224445	69	4.04485144471488e-05	0.116320453089398	0.310400511964949	0.000241840686648694
ARID1A	70	-0.0556538925367229	0.039443585013609	-1.41097449731106	69	0.162745097177075	-0.134341691615015	0.0230339065415689	0.28801507573394
ARID1B	70	0.0477067250863798	0.0411751685336459	1.15862853232517	69	0.250601967901781	-0.034435488596085	0.129848938768845	0.394945140461621
ARID2	69	0.0917245875843509	0.0440541268256722	2.08208842606997	68	0.0411000089138778	0.00381594620245186	0.17963322896625	0.0972355373003026
ARID3A	70	0.696904833365668	0.0971014672106086	7.17707830154732	69	6.34743696713926e-10	0.503192706553678	0.890616960177657	1.52214969519009e-08
ARID3B	68	0.313289695959967	0.0626294699233665	5.00227283327337	67	4.34089594132907e-06	0.188280750784752	0.438298641135183	3.36913064277682e-05
ARID4A	70	0.244013833840402	0.0480193868570248	5.08156912887997	69	3.056373547925e-06	0.148217778193719	0.339809889487084	2.47703609938153e-05
ARID4B	70	0.205055979898434	0.0421506584422133	4.86483455957295	69	6.95734454319996e-06	0.12096771709539	0.289144242701479	5.10174600519873e-05
ARID5A	67	0.841428607570208	0.126940495135399	6.6285278521461	66	7.37399463670007e-09	0.587983731658681	1.09487348348173	1.28189615228277e-07
ARID5B	70	0.100315716405885	0.0618901643368421	1.6208668611689	69	0.109607614368644	-0.0231517831781321	0.223783215989901	0.212544414510333
ARIH1	70	0.0870971410903165	0.0383701508898325	2.26991917077386	69	0.0263399762896047	0.0105507844956723	0.163643497684961	0.067577302111498
ARIH2	70	-0.311455892661956	0.0487746883571505	-6.38560497570653	69	1.69424788403269e-08	-0.408758733573337	-0.214153051750574	2.6391718092425e-07
ARL1	70	-0.0424211590252447	0.0402015019242296	-1.05521328793135	69	0.295008638145587	-0.122620960969411	0.037778642918922	0.444889632969298
ARL10	67	0.537359927706358	0.0733925688614666	7.32172120478111	66	4.32667409442292e-10	0.390826936102046	0.683892919310669	1.11210063455955e-08
ARL13B	68	-0.286292348488663	0.0620978032088974	-4.61034583664053	67	1.8603641420262e-05	-0.410240082460241	-0.162344614517085	0.000121694477730537
ARL14EP	70	-0.166511310892015	0.0478343838451184	-3.48099625221801	69	0.000870751669710361	-0.261938295628314	-0.0710843261557163	0.00359215427515626
ARL14EPL	12	0.297949146836075	0.275724108458545	1.0806060757682	11	0.30299484284765	-0.30891552416068	0.904813817832829	0.453388532383066
ARL15	68	-0.0636520432342435	0.0630583398218174	-1.00941514499278	67	0.316407203592103	-0.189517016309557	0.06221292984107	0.468246353331111
ARL16	70	-0.0602653657105891	0.047371473243823	-1.2721868581203	69	0.207577480423347	-0.154768869065229	0.0342381376440508	0.344054671654389
ARL17B	70	0.0384662878160747	0.0442090158971807	0.870100522154525	69	0.387262423931225	-0.049728285754409	0.126660861386558	0.54087993247969
ARL2	70	-0.110884769116258	0.0443834608208639	-2.49833534982322	69	0.0148642267720921	-0.199427350787433	-0.0223421874450842	0.0417893888794104
ARL2BP	70	-0.165749846283944	0.0408797539177805	-4.05457054896439	69	0.000130060137899896	-0.247302723932933	-0.084196968634956	0.000679942017180179
ARL3	70	-0.00625350135622321	0.0457390080852526	-0.136721402977681	69	0.891649154981796	-0.0975003258274507	0.0849933231150043	0.931588787895351
ARL4A	70	-0.0934794414845602	0.0587433928019076	-1.59131839387943	69	0.116109422111138	-0.210669303622569	0.0237104206534489	0.222217926130632
ARL4C	69	0.500717570936649	0.104636664783113	4.78529750517677	68	9.57000933282421e-06	0.291918357273507	0.70951678459979	6.78650725769523e-05
ARL4D	65	0.000564152769293455	0.0932654572231151	0.00604889297807071	64	0.995192526725826	-0.185755016848822	0.186883322387409	0.996900317369593
ARL5A	70	-0.006349813187118	0.0423935654010881	-0.149782475879111	69	0.881373195993814	-0.0909226621140676	0.0782230357398316	0.925210365507301
ARL5B	70	0.278399486810151	0.0582532315553738	4.77912519832506	69	9.5922944379949e-06	0.162187469603578	0.394611504016725	6.79579288481644e-05
ARL6IP1	70	-0.0094728399520298	0.0608041658500315	-0.15579261420005	69	0.87665138370245	-0.13077383183397	0.111828151929911	0.922095255431535
ARL6IP4	70	0.0599039988540905	0.0400948293467215	1.49405795784959	69	0.139719693878093	-0.0200829971206586	0.13989099482884	0.255917986379289
ARL6IP5	70	-0.0548462811547171	0.0488588836482667	-1.1225447054737	69	0.265521870728687	-0.152317087076085	0.0426245247666504	0.412538077782709
ARL6IP6	69	0.0224155370118622	0.0485728808080943	0.461482552381922	68	0.645925297189698	-0.0745101375507348	0.119341211574459	0.756924616179444
ARL8A	69	0.190407338737862	0.054253291352058	3.509599767916	68	0.000801103420150016	0.0821465814170189	0.298668096058705	0.00334275321026479
ARL8B	70	-0.0235659688167346	0.0383569856184924	-0.614385318260599	69	0.540981362233148	-0.10008606141368	0.052954123780211	0.675374188262927
ARMC1	70	-0.224619189043916	0.0454793491333004	-4.93892708063069	69	5.26057279627479e-06	-0.315348008079455	-0.133890370008376	3.99349848620696e-05
ARMC10	70	-0.0712227382808729	0.0422664844181525	-1.68508782458104	69	0.0964897010600929	-0.155542067583568	0.0130965910218219	0.192005023345409
ARMC4	51	-0.284653928404614	0.110123019961263	-2.58487215937906	50	0.0127062276961964	-0.505842523599863	-0.0634653332093645	0.0364948262018683
ARMC5	69	0.0177711897441391	0.0584455995917597	0.30406377671322	68	0.762007822891719	-0.0988551884200063	0.134397567908284	0.844340752654184
ARMC6	70	-0.658086038440667	0.0696210073233801	-9.45240615930687	69	4.51088475768229e-14	-0.796976147795591	-0.519195929085742	4.95348741063904e-12
ARMC7	69	-0.407870964186576	0.0562457152979826	-7.25159173504556	68	4.98736440681759e-10	-0.520107541589749	-0.295634386783404	1.24303053114638e-08
ARMC8	70	-0.208624699236008	0.044058867028609	-4.73513536107365	69	1.13004170903839e-05	-0.296519734009551	-0.120729664462465	7.85540118768081e-05
ARMC9	70	-0.188065263951951	0.0554404968272903	-3.39220019145603	69	0.0011515126095222	-0.298666028908822	-0.0774644989950814	0.00459321213889974
ARMCX3	64	0.177619522327626	0.0548999653119112	3.23533031976415	63	0.0019373685047094	0.067910695861852	0.287328348793401	0.00722769261280219
ARMCX5	66	-0.187608933012775	0.0537066659095226	-3.49321503831259	65	0.000863983316472569	-0.294868551434027	-0.0803493145915226	0.00356688589726308
ARMCX6	64	-0.010368792653833	0.0560129765348832	-0.185114116322235	63	0.853734191914575	-0.122301794570753	0.101564209263087	0.908449191453953
ARMH3	68	-0.0687543166143185	0.0454377595532756	-1.51315375780587	67	0.134943717952041	-0.159448464270849	0.0219398310422123	0.249256520244165
ARMT1	68	-0.212864316458424	0.0595775710349285	-3.57289350271813	67	0.000659820140721107	-0.331781645956677	-0.0939469869601711	0.00282027476155245
ARNT	70	0.198799346951501	0.0412579137123806	4.81845369926803	69	8.28042042218866e-06	0.116492061154098	0.281106632748905	5.97488381919132e-05
ARNT2	52	0.0927208106608193	0.186136305671752	0.498133936451552	51	0.620531043140694	-0.280963415672338	0.466405036993977	0.738247229763844
ARNTL	66	0.249826108039151	0.0664937024440533	3.75713938097146	65	0.00036996041792945	0.117029014218794	0.382623201859508	0.00169870875398697
ARNTL2	67	-0.388514679971977	0.0765669068942768	-5.07418538544905	66	3.39409267059306e-06	-0.541385441946325	-0.23564391799763	2.71600878856765e-05
ARPC1A	70	-0.0638716013498496	0.0367510556063889	-1.73795283689065	69	0.086680275007414	-0.137187951232166	0.00944474853246717	0.177096975243111
ARPC1B	69	-0.142624283657816	0.0594473225891647	-2.39917085321874	68	0.0191788619733282	-0.261249568941182	-0.0239989983744502	0.0517549289893391
ARPC2	70	0.0774911949711802	0.0343616780632164	2.25516329058834	69	0.0272982980168078	0.00894152286357562	0.146040867078785	0.0696572928343299
ARPC3	70	0.0441015870300218	0.0367668788094487	1.1994922728847	69	0.23443933294476	-0.0292463292786913	0.117449503338735	0.376484878486639
ARPC4	70	-0.1335060632084	0.0374128834003789	-3.56845158871258	69	0.000658533245131003	-0.208142723413928	-0.0588694030028729	0.00281673437013033
ARPC4-TTLL3	54	0.630264365138591	0.109801949153776	5.74001071926252	53	4.67891108996565e-07	0.410029545345309	0.850499184931872	4.66670889377779e-06
ARPC5	70	-0.0587864610741638	0.0366428502119153	-1.60430918266964	69	0.113213756354747	-0.131886947100885	0.0143140249525579	0.217900871449979
ARPC5L	70	-0.398867785428537	0.0460171188390305	-8.66781309850776	69	1.20260905574936e-12	-0.490669425672905	-0.307066145184168	7.3286467238001e-11
ARPIN	70	-0.159921215518353	0.0549936789842327	-2.90799267247066	69	0.00488917579456983	-0.269630603267827	-0.0502118277688782	0.016119455629481
ARPP19	70	-0.0378356792396098	0.0421124322701915	-0.898444407030631	69	0.372073205296111	-0.121847682916043	0.0461763244368229	0.525555771770144
ARRB1	70	0.079698447863118	0.092484601364621	0.861748298496812	69	0.391811019158295	-0.104803283597253	0.264200179323489	0.545344294846539
ARRB2	69	-0.13743606389121	0.0480217285622462	-2.86195578555787	68	0.00559067633744474	-0.23326193127073	-0.0416101965116907	0.0180591790472112
ARRDC1	68	0.0924767654025973	0.0527130408280035	1.75434321279886	67	0.0839440386437527	-0.0127389044561742	0.197692435261369	0.172779684995427
ARRDC1-AS1	63	-0.336288651478392	0.062826816452159	-5.35262918716353	62	1.33694698877783e-06	-0.461877668072142	-0.210699634884642	1.18387856706865e-05
ARRDC2	69	0.579346447294809	0.0966030744819134	5.99718435879883	68	8.60018327572057e-08	0.386578013485548	0.772114881104071	1.06753925809756e-06
ARRDC3	69	1.62274944175789	0.134005882228667	12.1095388856799	68	1.23328044369839e-18	1.35534486714173	1.89015401637404	7.19911231634676e-16
ARRDC4	65	0.508500348841121	0.129927692118176	3.913718011543	64	0.000222879006103756	0.248939945379581	0.768060752302661	0.00108872541585411
ARSA	70	0.302681742972985	0.0693319044597542	4.36569203358153	69	4.35435695958246e-05	0.164368378050345	0.440995107895624	0.000258257609832776
ARSB	70	-0.315832234898118	0.0607719840991366	-5.19700384280534	69	1.96086203226752e-06	-0.43706902594366	-0.194595443852576	1.66714609427973e-05
ARSD	66	0.200984220377705	0.0753528256788287	2.66724198551421	65	0.00964214855297258	0.050494235710062	0.351474205045349	0.0288289714519528
ARSG	67	0.115684431289791	0.0790212085454444	1.46396686939129	66	0.147949881231482	-0.0420865020346541	0.273455364614235	0.267751021088092
ARSJ	58	-0.0269230610994239	0.0906767070512199	-0.296912646863279	57	0.767612501916257	-0.208500034931741	0.154653912732893	0.848558781895067
ARSK	70	0.0711626695546545	0.06262335304172	1.13635993759781	69	0.259737304501204	-0.0537675014745668	0.196092840583876	0.406085297003841
ART5	15	0.328576338156423	0.29595293780972	1.11023171652946	14	0.285604817754663	-0.306179583108031	0.963332259420877	0.434697822659115
ARTN	34	1.07473347926926	0.254032202146627	4.23069780204056	33	0.000174012854295621	0.557901077957201	1.59156588058131	0.000878060312553561
ARV1	70	-0.329186754858659	0.0535187444222644	-6.15086841838752	69	4.42339332756382e-08	-0.435953728666152	-0.222419781051167	6.09439197465967e-07
ARVCF	65	0.210899878123685	0.0837667297381594	2.51770456818504	64	0.0143256705946415	0.0435565980805483	0.378243158166822	0.0404702018759982
ASAH1	70	-0.0612787433195939	0.0595827763089536	-1.02846404809749	69	0.307323433257574	-0.180143129736501	0.0575856430973133	0.458131009459825
ASAH2B	68	-0.240918456043504	0.0544160369688714	-4.42734292064159	67	3.60525433631843e-05	-0.34953332042632	-0.132303591660687	0.000217966071649538
ASAP1	70	0.056434369295799	0.0518878780052546	1.08762145351336	69	0.280546870815287	-0.0470791150304275	0.159947853622025	0.429682433779237
ASAP2	69	0.189434781645261	0.0550002795714856	3.44425124965132	68	0.000984976103576119	0.0796834325404064	0.299186130750116	0.00400673756272244
ASAP3	67	-0.154453543084335	0.0681967863161681	-2.26482142968249	66	0.0268131121905017	-0.29061282013009	-0.0182942660385798	0.0686324087941044
ASB1	70	-0.00573425852748155	0.0445741295060126	-0.128645440551072	69	0.898012448233821	-0.0946572138178977	0.0831886967629346	0.936290091351736
ASB13	68	-0.262889633859322	0.0703278299001255	-3.73805980125732	67	0.00038604317766293	-0.403264569860442	-0.122514697858201	0.00176561026122044
ASB16-AS1	67	-0.197216507557764	0.0693690063208441	-2.84300609187916	66	0.0059420279156295	-0.335716197356039	-0.0587168177594883	0.0190388651198171
ASB3	NA	NA	NA	NA	NA	NA	NA	NA	NA
ASB6	70	-0.193207150924219	0.0435362604618382	-4.43784442840642	69	3.35938421287937e-05	-0.280059614123478	-0.106354687724961	0.00020511384698621
ASB7	70	0.0607847072633014	0.0494208232246068	1.22994121297916	69	0.22289625398151	-0.0378071374394533	0.159376551966056	0.362670337109797
ASB8	69	-0.0483046495914064	0.0465747735693085	-1.03714190943996	68	0.30334380629611	-0.141243163237341	0.0446338640545286	0.453727060772779
ASB9	55	0.115733155898956	0.148043276485877	0.781752191967977	54	0.437774546474279	-0.181075742883077	0.412542054680989	0.587531158633377
ASCC1	58	0.129850427351956	0.0575901657502609	2.25473265548586	57	0.0280088709601655	0.0145281096422149	0.245172745061698	0.0710536111205845
ASCC2	47	-0.109750931812589	0.736789020449298	-0.148958424686707	46	0.882237570459024	-1.59283030840714	1.37332844478196	0.925726145223839
ASCC3	69	-0.0907039922308983	0.0477853422998268	-1.89815512174801	68	0.0619207965744419	-0.186058158167943	0.0046501737061465	0.135413045068887
ASF1A	68	-0.517693424734762	0.0742420200676363	-6.9730514372202	67	1.69262716960225e-09	-0.665881117009478	-0.369505732460046	3.52212531670892e-08
ASF1B	70	-0.683031606088322	0.132936978064486	-5.13801062753955	69	2.46130040665827e-06	-0.948233620976281	-0.417829591200364	2.05096039145356e-05
ASH1L	70	0.118510160337081	0.0401074157981515	2.95481915198692	69	0.00427681231811541	0.0384980550787588	0.198522265595403	0.0143739774000661
ASH2L	70	-0.0583528263001311	0.0470878130829375	-1.23923415592379	69	0.219457496513351	-0.152290443117364	0.0355847905171017	0.358353063915395
ASIC1	58	0.150278193078768	0.0860244296555566	1.74692460828261	57	0.0860368209714559	-0.0219827559616931	0.322539142119229	0.176092818218023
ASIC3	45	0.707470367732436	0.106576829028547	6.63812551171829	44	3.88539782560822e-08	0.492678882321266	0.922261853143607	5.43821317705277e-07
ASIC4	18	1.35810929981556	0.369757200119286	3.67297594036688	17	0.00188527452919666	0.577989798987859	2.13822880064326	0.00706166153438707
ASL	70	0.0302811483400046	0.0525382557848378	0.576363792205366	69	0.566244740597819	-0.0745298041556889	0.135092100835698	0.696023541834247
ASMTL	68	0.031852049160704	0.051137581152186	0.622869686892541	67	0.53548457977876	-0.0702189900237059	0.133923088345114	0.670663370145811
ASNA1	69	-0.289961943245674	0.0451898030096772	-6.41653479178877	68	1.56912152803292e-08	-0.38013679116892	-0.199787095322429	2.46852863367562e-07
ASNS	70	-0.112899539850693	0.141554425488528	-0.797569835496542	69	0.427856392819151	-0.395292891967171	0.169493812265785	0.578850926340614
ASNSD1	70	-0.282310907463855	0.0437893716689613	-6.44701891587	69	1.31633898321066e-08	-0.369668313705276	-0.194953501222434	2.11740618749666e-07
ASPH	70	0.352649937608442	0.0645927644242874	5.45958886806589	69	7.04844266537482e-07	0.223790898371108	0.481508976845776	6.72466904100405e-06
ASPHD1	60	-0.0642395760965981	0.0656405593386616	-0.978656744302934	59	0.331745564050817	-0.195586031948389	0.0671068797551924	0.483335310461426
ASPHD2	62	0.178598062906146	0.088210174562441	2.02468778451087	61	0.047283188955163	0.00221091741456803	0.354985208397723	0.108844201238326
ASPM	70	-0.393532670293709	0.126827078071179	-3.10290733082131	69	0.00277691119702666	-0.646545768203256	-0.140519572384162	0.0098935824240998
ASPSCR1	68	-0.221404611497287	0.0565926372567511	-3.91225117311307	67	0.000216245427334064	-0.334363988238085	-0.108445234756489	0.0010605253303392
ASRGL1	62	-0.410762880377289	0.104945091358065	-3.91407425599162	61	0.000231274419849775	-0.620613560186323	-0.200912200568254	0.00112379609662819
ASS1	61	0.462009549190859	0.117950816249921	3.91696779962866	60	0.000232181996532354	0.226072788341337	0.69794631004038	0.00112746520295111
ASTN2	69	0.0509947414482678	0.0533526694425542	0.95580487314088	68	0.342556547875966	-0.0554688528331955	0.157458335729731	0.495196657508665
ASXL1	70	0.089379517531805	0.0367392945757158	2.43280440095559	69	0.0175789601435744	0.0160866302637066	0.162672404799903	0.0481106099820811
ASXL2	67	0.0237756247478171	0.0466277006850453	0.509903435050629	66	0.611820081400763	-0.0693195833775026	0.116870832873137	0.731808737968818
ATAD1	69	-0.0378958841133644	0.0469217759948418	-0.80763959398149	68	0.422114317365581	-0.131526830318582	0.055735062091853	0.573980248133594
ATAD2	70	-0.525806351306714	0.0991918549751698	-5.30090249283408	69	1.31089496035367e-06	-0.723688687605411	-0.327924015008017	1.16359631895019e-05
ATAD2B	69	-0.05486535395524	0.0490811301383944	-1.11785025732977	68	0.267564757424771	-0.152805224265871	0.0430745163553909	0.415014435997222
ATAD3A	70	-0.71294575786605	0.0804574477525846	-8.86115304152371	69	5.34058059188659e-13	-0.873453974371299	-0.552437541360801	3.7538182125744e-11
ATAD3B	70	-0.626845226329437	0.0898825156614581	-6.9740507563278	69	1.48222937949958e-09	-0.806155938846568	-0.447534513812307	3.14028768825784e-08
ATAD5	69	-0.352882007330226	0.109211993939153	-3.23116531987167	68	0.00190151275473838	-0.570811148175309	-0.134952866485142	0.00711287621005174
ATAT1	66	0.0279446047884965	0.0605557732122338	0.461468879120033	65	0.646002870354051	-0.0929936254656446	0.148882835042638	0.756924616179444
ATE1	70	-0.176337556497979	0.0593955440443332	-2.96886844518774	69	0.00410743845502147	-0.294828424767022	-0.0578466882289369	0.0138973764199643
ATF1	70	0.00984862083972156	0.0462970299160374	0.212726839228837	69	0.832167252191207	-0.0825114267243599	0.102208668403803	0.893176077361709
ATF2	69	0.27976559312504	0.0422963792185463	6.61440998718792	68	6.97239034033944e-09	0.195364482482456	0.364166703767624	1.22262104766332e-07
ATF3	64	0.793979208959146	0.143801578888545	5.52135251292706	63	6.78892830636757e-07	0.506614683787672	1.08134373413062	6.49383388063154e-06
ATF4	70	0.22793008100795	0.058274514497814	3.91131668744319	69	0.000212228522717938	0.111675605492936	0.344184556522964	0.00104374756092832
ATF5	70	-0.528098957928424	0.0886399960660079	-5.95779536740009	69	9.67537799675451e-08	-0.70493091167543	-0.351267004181418	1.18182397975776e-06
ATF6	70	-0.0642316882291388	0.0487872225648035	-1.31656783994663	69	0.192339961823824	-0.16155953420061	0.0330961577423324	0.325586464680713
ATF6B	67	-0.0226958849705151	0.0443166483381606	-0.512129996775318	66	0.610269556529789	-0.111176928209709	0.0657851582686785	0.730702758444553
ATF7	68	0.0566657037806257	0.0446316328515381	1.26963098054507	67	0.208608333082452	-0.0324194082448341	0.145750815806086	0.345298861609951
ATF7IP	70	-0.260578627897726	0.0541079637154459	-4.81590157907458	69	8.35995351173364e-06	-0.368521062032644	-0.152636193762809	6.02275052930418e-05
ATF7IP2	53	-0.0636557458147972	0.0749048640916105	-0.84982125776164	52	0.399320332085865	-0.213963352027807	0.0866518603982131	0.55274406279742
ATG10	69	0.203345955704915	0.058855217618318	3.45502002938184	68	0.000952149684355844	0.0859021974950194	0.320789713914811	0.00388625877554865
ATG101	70	-0.143852111696358	0.0469707252513681	-3.06259081431083	69	0.00312740878316704	-0.237556144680836	-0.0501480787118791	0.0109471645302527
ATG12	70	0.199184145073575	0.0412109354902362	4.83328375597701	69	7.83267617641759e-06	0.116970578265048	0.281397711882102	5.67977845522377e-05
ATG13	70	0.0330506625529237	0.0403145264783067	0.8198201849328	69	0.415141601785332	-0.0473746172071936	0.113475942313041	0.567350810843586
ATG14	70	0.361147164809932	0.0553112664606867	6.52935989210485	69	9.37719157432528e-09	0.25080420738041	0.471490122239453	1.57222119048892e-07
ATG16L1	70	-0.126956716686581	0.0435510286811885	-2.91512555572354	69	0.00479093924131007	-0.213838641677322	-0.0400747916958406	0.0158355854940754
ATG16L2	67	0.159590203122641	0.074898505684387	2.13075283230795	66	0.0368396200308425	0.0100505116404963	0.309129894604785	0.0890479868694298
ATG2A	70	-0.0991551100986788	0.0590028939436985	-1.68051265745192	69	0.0973797269757594	-0.216862662849719	0.0185524426523612	0.193278194682918
ATG2B	70	-0.108819085017869	0.0442793269879931	-2.45755959767357	69	0.0165051440186844	-0.1971539253766	-0.0204842446591377	0.0456050205060359
ATG3	70	-0.342932416972332	0.041812866204744	-8.20160032304657	69	8.55197042294458e-12	-0.426346802699978	-0.259518031244685	4.01906372715586e-10
ATG4A	70	-0.358300493393878	0.0673263259264688	-5.32184830322095	69	1.20825845833924e-06	-0.492612838616903	-0.223988148170854	1.08596390287201e-05
ATG4B	70	-0.104511234795043	0.0434083962144887	-2.40762718527157	69	0.0187348521809241	-0.191108615800295	-0.0179138537897901	0.0507915535415861
ATG4C	69	-0.243351426508474	0.0530147114443164	-4.59026220984106	68	1.96473996128659e-05	-0.349140636104325	-0.137562216912622	0.00012773113077743
ATG4D	70	-0.0723822352602561	0.0635257992359576	-1.13941479101117	69	0.258470335834209	-0.199112737187053	0.0543482666665405	0.40430075378848
ATG5	69	-0.00785847827303157	0.0434676404732172	-0.180789161488386	68	0.857070822499868	-0.094596804359899	0.0788798478138358	0.910534802468785
ATG7	69	-0.125689842000639	0.0455174661181145	-2.76135410689346	68	0.00739436601715426	-0.216518531476747	-0.0348611525245313	0.0230206072971952
ATG9A	70	0.247986866406945	0.0451808348153879	5.4887623794522	69	6.28425950485482e-07	0.15785356714127	0.338120165672621	6.03713487815892e-06
ATG9B	33	1.84911437213797	0.374384917718489	4.9390728221813	32	2.37197153099392e-05	1.08651724994861	2.61171149432733	0.000150845964737693
ATIC	70	-0.564320818467889	0.0579493395808917	-9.73817514658905	69	1.37673684093699e-14	-0.679926587773281	-0.448715049162496	1.85083494579784e-12
ATL2	70	-0.144378698981397	0.0424481217086531	-3.40129770575843	69	0.00111922704074939	-0.229060384763988	-0.059697013198805	0.00448459071855186
ATL3	70	0.0747400577884967	0.0374460847523816	1.99593784724699	69	0.0498892666827625	3.71626980160272e-05	0.149442952878977	0.113723534431923
ATM	70	0.206934167513749	0.0499953706760961	4.1390665718714	69	9.70161030498757e-05	0.107196132006884	0.306672203020614	0.000522840427077828
ATMIN	70	-0.0527746332596584	0.0400439014732347	-1.31791936644667	69	0.191889478479443	-0.132660030906694	0.0271107643873771	0.325146467926896
ATN1	69	0.0681061181957611	0.0465519916805692	1.4630119085579	68	0.148071146848396	-0.0247869348989953	0.160999171290517	0.267948619627273
ATOX1	70	-0.24382786710612	0.0546641993178991	-4.46046718233523	69	3.09566342415283e-05	-0.352879960905871	-0.134775773306369	0.000190956635357503
ATP10D	62	-0.196073393725064	0.0541933848019338	-3.6180318767996	61	0.000603968081811963	-0.304439764125717	-0.0877070233244104	0.00260849298885377
ATP11A	67	0.185081129259678	0.0895001818745361	2.06794137602011	66	0.0425688624897011	0.00638825063921905	0.363774007880138	0.10010203622883
ATP11B	69	0.258419406650755	0.0437594809386062	5.90544954162764	68	1.24302771588976e-07	0.17109872198227	0.345740091319241	1.46742101084974e-06
ATP11C	69	-0.0556631354530549	0.0437389097340498	-1.27262283837227	68	0.207486131723817	-0.142942770921966	0.0316165000158559	0.343954665114544
ATP13A1	69	-0.194944546206706	0.0431392738161035	-4.51895752899612	68	2.5471903495803e-05	-0.281027626831186	-0.108861465582227	0.000160790484730763
ATP13A2	69	-0.0847832265955358	0.0585830349656649	-1.44723172237878	68	0.152426589326281	-0.201683852778388	0.0321173995873167	0.274130582490317
ATP13A3	70	-0.0224906622790824	0.0644823118243416	-0.348788088435011	69	0.728310479136016	-0.151129354608568	0.106148030050403	0.820528368540561
ATP1A1	70	0.0119878132387451	0.0395889680395589	0.302806913955585	69	0.762948033840707	-0.0669900170406	0.0909656435180902	0.845044853780125
ATP1A3	38	-0.00468179963415913	0.0808879388303131	-0.0578800708963622	37	0.954155623317516	-0.168576331642099	0.159212732373781	0.973107128111685
ATP1B1	68	0.147836381720592	0.0998963076350714	1.47989835881271	67	0.14358737028094	-0.0515574828552916	0.347230246296475	0.26152024366301
ATP1B3	70	-0.284544594700109	0.0525552464561651	-5.41419960683545	69	8.42275867025876e-07	-0.389389442657667	-0.179699746742552	7.92003530409834e-06
ATP23	65	-0.0645125289118753	0.0613579538071183	-1.05141265164535	64	0.297022917901032	-0.187089132760611	0.0580640749368602	0.447227963947915
ATP2A1	41	0.294796182138363	0.0962457865502118	3.06295156084122	40	0.003909968649821	0.100276191521059	0.489316172755666	0.0133168458995921
ATP2A1-AS1	54	-0.761862036721612	0.113373100575471	-6.71995414127754	53	1.2729751008861e-08	-0.989259679177634	-0.534464394265591	2.0521172738267e-07
ATP2A2	70	-0.251301506235974	0.0611976582908934	-4.10639088576644	69	0.00010870089652436	-0.373387494058691	-0.129215518413257	0.000577924952974111
ATP2A3	44	0.139662069060446	0.122317570484337	1.14179891333216	43	0.259856199548903	-0.107014821163816	0.386338959284709	0.406182102627987
ATP2B1	70	0.120925193493933	0.063828168014408	1.89454275840467	69	0.0623442550174706	-0.00640851764110439	0.248258904628971	0.136167808664586
ATP2B4	70	0.257325292870918	0.0700867633952432	3.67152484157063	69	0.000471405099357087	0.117506025575872	0.397144560165965	0.00210481238203279
ATP2C1	70	0.243611422080187	0.0609773484974237	3.99511340002721	69	0.00015955084244896	0.121964940269855	0.365257903890518	0.000813412270099476
ATP2C2	22	0.0203010635547424	0.188917569979301	0.107459901993058	21	0.915444184902132	-0.372574530486523	0.413176657596008	0.947523816410764
ATP2C2-AS1	42	0.821621454145154	0.139632180541308	5.88418408249443	41	6.32223778509555e-07	0.539628544749915	1.10361436354039	6.06836341622628e-06
ATP5F1A	70	-0.23845110040913	0.041569227583334	-5.73624082697004	69	2.35517480058063e-07	-0.321379440386051	-0.155522760432208	2.54345118921517e-06
ATP5F1B	70	-0.275316667289834	0.0430506405976689	-6.39518166205272	69	1.62891880251505e-08	-0.361200345367583	-0.189432989212085	2.54634791243051e-07
ATP5F1C	70	-0.123577781963153	0.0440355888657283	-2.80631609900714	69	0.00650741861603641	-0.211426378072385	-0.035729185853921	0.0206358198342987
ATP5F1D	70	-0.189901351446445	0.0670580716814826	-2.83189400894874	69	0.00605945771714772	-0.323678544093351	-0.0561241587995391	0.0193787328549266
ATP5F1E	70	-0.12635470735369	0.0608203224130506	-2.07750801608012	69	0.0414785060023083	-0.247687930696949	-0.00502148401043048	0.0979638224172915
ATP5IF1	70	0.00948981733708197	0.0587706297455143	0.161472105678879	69	0.872193456863576	-0.107754381016697	0.126734015690861	0.919274053670877
ATP5MC1	70	-0.718580698418398	0.0679499664743534	-10.5751442672104	69	4.42338807364482e-16	-0.8541371724931	-0.583024224343696	1.00122034948561e-13
ATP5MC2	70	-0.112017144906915	0.10584406068707	-1.05832244322235	69	0.293599468840821	-0.323170268490918	0.0991359786770886	0.443427753647926
ATP5MC3	70	-0.340364462485889	0.0510696291160944	-6.66471381086699	69	5.3600540573503e-09	-0.442245584942269	-0.23848334002951	9.70585462041995e-08
ATP5MD	70	-0.121720033007921	0.0460647053403883	-2.64237081532356	69	0.0101784970495384	-0.213616605724995	-0.0298234602908478	0.0301159692614195
ATP5ME	70	-0.122018426122863	0.0690374801491447	-1.76742293981851	69	0.0815789162566892	-0.259744430616957	0.0157075783712298	0.168678553356253
ATP5MF	70	-0.277742140840059	0.0569276100588425	-4.87886529142843	69	6.59949858776706e-06	-0.391309615519959	-0.164174666160158	4.87804324138117e-05
ATP5MG	70	-0.165700980492612	0.0431464474166472	-3.84043160940939	69	0.000269469954921917	-0.251775787944618	-0.0796261730406061	0.00128739662719749
ATP5MPL	70	-0.165039755519675	0.0407061835873978	-4.05441485727415	69	0.000130130025566043	-0.246246369833867	-0.0838331412054819	0.000680147084614976
ATP5PB	70	-0.223945166089989	0.0379106211100541	-5.90718799989795	69	1.18654716287654e-07	-0.29957478585736	-0.148315546322619	1.40899299608819e-06
ATP5PD	70	-0.0662023501089787	0.0543637208342998	-1.21776708976126	69	0.227460562798315	-0.174655005735535	0.0422503055175775	0.368206247098609
ATP5PF	70	-0.164272384714893	0.0532391677171405	-3.08555508582838	69	0.00292301663049992	-0.270481618256328	-0.0580631511734584	0.0103459956754028
ATP5PO	70	0.0257388791972389	0.0379856998658558	0.677593917925277	69	0.500294996792446	-0.0500405185897898	0.101518276984268	0.641626070911403
ATP6AP1	70	0.103740108218084	0.0440741053286329	2.35376549210833	69	0.0214384016150574	0.0158146738677743	0.191665542568394	0.0568020335194939
ATP6AP1L	66	0.37970622799377	0.0788180688974255	4.8175022974481	65	9.07327143147606e-06	0.222295674732469	0.537116781255071	6.47148896762064e-05
ATP6AP2	70	0.155730230200807	0.0436119174591826	3.57081823670234	69	0.000653537725467874	0.0687268354215749	0.242733624980038	0.00279752486034897
ATP6V0A1	69	-0.0714325292754965	0.0505618893577627	-1.41277413053256	68	0.162282955864104	-0.172327208603305	0.0294621500523123	0.287543775619264
ATP6V0A2	70	-0.473106022755199	0.0613432118635083	-7.71244296447802	69	6.70806103141647e-11	-0.595482382010257	-0.350729663500141	2.28218113188467e-09
ATP6V0B	70	-0.29939587520142	0.0505316289529254	-5.92492032030738	69	1.10473521541129e-07	-0.400203716698959	-0.198588033703881	1.32317691945211e-06
ATP6V0C	70	-0.114329005666973	0.0438050005440569	-2.60995329864193	69	0.0110971574836335	-0.201717590661109	-0.0269404206728364	0.0324745576915513
ATP6V0D1	70	-0.280175095913027	0.0709220283175241	-3.95046648494962	69	0.000185818871467562	-0.421660671135178	-0.138689520690877	0.000930856866958776
ATP6V0E1	70	-0.110344729214662	0.0387344600990885	-2.8487483479151	69	0.00577997984427376	-0.187617862795993	-0.033071595633331	0.0185833904929552
ATP6V0E2	68	-0.484968672013316	0.0660626208956602	-7.34104498789534	67	3.7027639575954e-10	-0.61683021520986	-0.353107128816772	9.72008403637647e-09
ATP6V1A	70	-0.158959967004356	0.0446475635223746	-3.56032792079898	69	0.000675958074495482	-0.248029419149026	-0.0698905148596858	0.00287960476444379
ATP6V1B2	70	-0.122282152633446	0.0396388319604183	-3.08490807084203	69	0.00292860068386635	-0.201359458713089	-0.0432048465538029	0.0103624534007854
ATP6V1C1	70	-0.0656598753905244	0.0395371091394467	-1.66071513116812	69	0.101308604162976	-0.144534249994858	0.0132144992138092	0.199735797488502
ATP6V1C2	41	0.381349028734307	0.169454739860063	2.2504476950555	40	0.0299878607873517	0.038868224232383	0.723829833236232	0.0750949117165313
ATP6V1D	70	-0.00139716574953299	0.0459677876462982	-0.0303944527477276	69	0.975840214116678	-0.0931003929571388	0.0903060614580728	0.986062368254025
ATP6V1E1	70	-0.0972893370364131	0.0418224906439833	-2.32624445695009	69	0.0229495590325979	-0.180722922994993	-0.0138557510778332	0.060166306401263
ATP6V1F	70	-0.0160580078572292	0.0453467780176482	-0.354115740063818	69	0.724332011155577	-0.106522354753422	0.0744063390389638	0.818161991128843
ATP6V1G1	NA	NA	NA	NA	NA	NA	NA	NA	NA
ATP6V1H	70	-0.0698953174894893	0.0462802451743047	-1.51026247216806	69	0.135542613296387	-0.162221880410007	0.0224312454310287	0.250118086971838
ATP7A	68	0.374969299275688	0.0648235262085091	5.78446316032815	67	2.09376529180779e-07	0.245580999426126	0.504357599125249	2.31294331189644e-06
ATP7B	68	0.0971251293290377	0.0603246593742184	1.61004024451313	67	0.112090931512091	-0.0232833947356327	0.217533653393708	0.216152398748257
ATP8B2	58	0.176076974667193	0.21181336506415	0.831283590692525	57	0.409282280641319	-0.248071972689964	0.600225922024351	0.561905028729698
ATP8B3	53	0.727752922503057	0.118080598983056	6.16318793070728	52	1.06267232252211e-07	0.490806865813937	0.964698979192176	1.28179431529013e-06
ATP9A	69	0.0838102816282257	0.0553538635290422	1.51408187766791	68	0.134639545530281	-0.0266466332785857	0.194267196535037	0.248901941741203
ATP9B	64	-0.0358340722912838	0.053727579267629	-0.666958623108373	63	0.507234058982539	-0.143200072193284	0.0715319276107161	0.647148845333602
ATPAF1	69	-0.189105840480908	0.0449440648141675	-4.20758205255385	68	7.73737821065144e-05	-0.278790325469748	-0.0994213554920675	0.000428219868933808
ATPAF2	69	-0.0874561198257879	0.0549198153686308	-1.59243288126094	68	0.115925769019627	-0.197046905113754	0.0221346654621782	0.221945918211062
ATR	70	-0.55911995964103	0.0645248569740352	-8.66518712108141	69	1.215952598155e-12	-0.687843527221832	-0.430396392060228	7.38966041980115e-11
ATRAID	70	0.054020466614724	0.0401541806515421	1.34532608406366	69	0.182924704300028	-0.0260849319734577	0.134125865202906	0.313912717838715
ATRIP	70	-0.455960404432557	0.0601246484882712	-7.58358536634944	69	1.15336367388205e-10	-0.575905796269168	-0.336015012595946	3.60336803014811e-09
ATRN	70	0.315690927920826	0.0444039421179291	7.10952480485643	69	8.41960552630412e-10	0.227107487179976	0.404274368661676	1.91552502343054e-08
ATRX	70	0.192711715062901	0.0387458582209783	4.9737371660169	69	4.61032831520027e-06	0.115415842850565	0.270007587275237	3.55461601278319e-05
ATXN1	68	0.517060980363903	0.0643601608875653	8.03386711955534	67	2.09080871715687e-11	0.38859756156591	0.645524399161895	8.46319689123609e-10
ATXN10	70	-0.156118492468592	0.0384187897950621	-4.06359735174836	69	0.000126069349486997	-0.23276188102422	-0.0794751039129635	0.000660323567962351
ATXN1L	69	0.0542480093503586	0.046888135494866	1.15696665644336	68	0.251334149560491	-0.0393158082823194	0.147811826983037	0.395747985079508
ATXN2	70	0.0773516490988213	0.0481266152261221	1.60725304980178	69	0.112565710932691	-0.0186583212911611	0.173361619488804	0.216898245301333
ATXN2L	70	0.0798720689725289	0.0450510836761419	1.77292225746897	69	0.0806550753409071	-0.010002383852803	0.169746521797861	0.167079835750094
ATXN3	70	0.293103250862768	0.0477400020779306	6.13957348356013	69	4.63144594481964e-08	0.19786455260019	0.388341949125346	6.32992815452799e-07
ATXN7	70	0.200129328983815	0.0449221126199405	4.45502932324202	69	3.15715673538499e-05	0.110512166375734	0.289746491591897	0.000194155948722789
ATXN7L1	66	-0.0129677163588162	0.0599268552483367	-0.21639240545959	65	0.829359581175842	-0.13264991070599	0.106714477988357	0.891104588502908
ATXN7L2	63	-0.255331687384685	0.0726561360487941	-3.51424809066657	62	0.00082990746165205	-0.400569233883927	-0.110094140885444	0.00344544400418599
ATXN7L3	70	0.00181418024389658	0.0385050677749543	0.0471153629568888	69	0.962557387301958	-0.075001328172142	0.0786296886599352	0.9784816445228
ATXN7L3B	70	-0.0273361697797047	0.0517389067608108	-0.528348422707885	69	0.598952820297455	-0.130552464604845	0.0758801250454357	0.7215930621246
AUH	65	0.258137628975481	0.0573700968578099	4.49951530699465	64	2.93896198334189e-05	0.143527685211556	0.372747572739406	0.000182508551832278
AUNIP	67	-1.03167082885188	0.144699222875444	-7.12976067425003	66	9.51742346052752e-10	-1.32057214869504	-0.742769509008717	2.1175073941968e-08
AUP1	70	-0.246688236681869	0.0502289880342269	-4.91127228192954	69	5.84033922181083e-06	-0.346892326066226	-0.146484147297512	4.38410844731668e-05
AURKA	70	-0.517298192653806	0.116174167501814	-4.45278157595343	69	3.18291997933169e-05	-0.749059315465451	-0.285537069842162	0.000195577648148298
AURKAIP1	70	-0.356214172767303	0.0492955093934861	-7.22609781600863	69	5.16995380949161e-10	-0.454556023217214	-0.257872322317392	1.28277310293225e-08
AURKB	70	-0.523411812195654	0.119074549812005	-4.39566484208436	69	3.91047731564956e-05	-0.760959039399072	-0.285864584992236	0.000234248468311473
AVEN	68	-0.25791936366911	0.0622207444715095	-4.14523107783144	67	9.74990249649633e-05	-0.382112489427916	-0.133726237910303	0.000525060299046569
AVL9	70	0.0933209727939259	0.040678879874692	2.29408904771698	69	0.0248343477896182	0.0121688278962109	0.174473117691641	0.0642795218984026
AVPI1	66	0.464565179890341	0.114662217584544	4.05159772483731	65	0.000138201008840913	0.235568918491955	0.693561441288727	0.000716758189878216
AXIN1	70	0.0980646729233138	0.0506232737920625	1.93714601165699	69	0.0568224106057474	-0.00292599502587972	0.199055340872507	0.126486172810506
AXIN2	62	-0.0456246784331601	0.132960872888382	-0.343143644006167	61	0.732670194703862	-0.311496375742283	0.220247018875963	0.823432652324115
AXL	64	0.233405544692038	0.0973772422779664	2.39692087424056	63	0.0195120621801356	0.0388126535291131	0.427998435854963	0.0524880624884512
AZI2	70	0.277192107725609	0.0590320179748717	4.69562310818516	69	1.30850815709654e-05	0.159426454122111	0.394957761329107	8.9281230208291e-05
AZIN1	70	-0.218022694467338	0.0439135879474644	-4.96481168262013	69	4.76913695462914e-06	-0.305627905404041	-0.130417483530636	3.6605188902278e-05
AZIN2	65	0.44199959747588	0.108586070202833	4.07049998816834	64	0.000131351215187478	0.225073984985857	0.658925209965903	0.000685721971119945
B2M	70	0.0990144564964201	0.0416781500718482	2.37569221104418	69	0.0202984741735513	0.0158688221004351	0.182160090892405	0.0543137218477341
B3GALNT1	57	-0.476082445714079	0.0867269219983725	-5.4894424331468	56	1.01243860407986e-06	-0.649817347281562	-0.302347544146596	9.32637587861274e-06
B3GALNT2	70	-0.279363698733579	0.0505201062378573	-5.52975279620925	69	5.34659464848671e-07	-0.380148553043523	-0.178578844423635	5.24159569510389e-06
B3GALT5	37	-0.0600408303234555	0.183136336876565	-0.327847719068027	36	0.744925940300632	-0.431458536504351	0.31137687585744	0.832323612062995
B3GALT6	70	-0.263501457564982	0.0725690349994018	-3.63104535656501	69	0.000537887506908591	-0.408272721215795	-0.118730193914168	0.00236078762925334
B3GAT3	70	-0.0708294180468061	0.0479337819434815	-1.47765135933402	69	0.144051330284153	-0.166454696563705	0.0247958604700925	0.262322190982931
B3GLCT	70	-0.0149136907901063	0.0530889744247377	-0.280918796260585	69	0.779613330048398	-0.120823296911482	0.0909959153312695	0.857338896789132
B3GNT10	63	-0.136776775379596	0.0652538129153239	-2.09607330620026	62	0.0401640823046581	-0.267217288775153	-0.00633626198403883	0.0955442479674186
B3GNT2	69	-0.132230546117785	0.059476134325404	-2.22325387514813	68	0.0295253192977515	-0.250913324325677	-0.0135477679098932	0.0742014473296627
B3GNT3	25	0.231938041533651	0.101034935259209	2.2956222116499	24	0.0307374494048893	0.0234121839779879	0.440463899089314	0.0766518384147559
B3GNT4	45	1.28386244519535	0.185978504247652	6.90328406709698	44	1.58461373709526e-08	0.909047398191076	1.65867749219962	2.48925029429686e-07
B3GNT5	59	0.0634102264036456	0.0711546896775196	0.891160184817435	58	0.376525289873261	-0.0790213600027739	0.205841812810065	0.530358393444798
B3GNT7	47	0.356449083999146	0.0945670665106364	3.76927293138627	46	0.000465191006907857	0.166095452017165	0.546802715981127	0.00208113744074957
B3GNT9	62	0.342772788231148	0.0986243509864511	3.47553910167923	61	0.000944967395072061	0.145561209943821	0.539984366518474	0.00386240404597171
B3GNTL1	64	-0.226765455986259	0.0659225884131284	-3.43987488120383	63	0.00103766430581973	-0.358501237080122	-0.0950296748923967	0.00419338124097161
B4GALNT1	58	-0.247419853202025	0.129397231292132	-1.91209541913181	57	0.0608945485053356	-0.506533339392409	0.0116936329883592	0.133672723893652
B4GALNT3	34	0.00183669966431058	0.125293278306004	0.0146592035035177	33	0.988392336673597	-0.253074391716831	0.256747791045453	0.993601339207382
B4GALNT4	57	0.407043123290838	0.0908467687003872	4.48054596893002	56	3.72180778600888e-05	0.225055177054468	0.589031069527208	0.000224340055188176
B4GALT1	70	0.0752342015736476	0.0483651850116468	1.55554458347529	69	0.124391552667375	-0.0212517025161505	0.171720105663446	0.234291705975011
B4GALT2	70	-0.141185086964204	0.047124729912913	-2.99598718602984	69	0.0037979606234373	-0.235196350842137	-0.0471738230862715	0.0129949656870409
B4GALT3	70	-0.0817699710849746	0.0435774444947445	-1.87642878174823	69	0.0648259252106579	-0.168704594181855	0.00516465201190612	0.140410707405913
B4GALT4	69	0.282709090379694	0.0648303004412978	4.3607555179492	68	4.50078120694745e-05	0.153342240033821	0.412075940725566	0.000265663461236052
B4GALT5	70	-0.261020046644188	0.0555435674179898	-4.69937490114557	69	1.29044578551581e-05	-0.371826431803406	-0.150213661484969	8.81572787628943e-05
B4GALT6	67	-0.300666392904247	0.0890343100220413	-3.37697223497115	66	0.00123252125916372	-0.478429128360224	-0.12290365744827	0.00487340224077891
B4GALT7	70	0.14297590876358	0.0538723838795245	2.65397404880614	69	0.00986686835454336	0.0355034435422258	0.250448373984935	0.0293741610307987
B4GAT1	70	-0.124487395985202	0.0466652419092013	-2.66766850212462	69	0.00951026481940046	-0.217582006376833	-0.0313927855935708	0.0284884124542797
B9D1	69	-0.0983700520258333	0.0548914299883107	-1.79208397461647	68	0.0775681743830889	-0.207904195169264	0.0111640911175972	0.162031946903256
B9D2	67	0.187208883791428	0.0778589173702217	2.40446297116159	66	0.0190102776176936	0.0317585396718949	0.342659227910961	0.0513815847372083
BABAM1	70	-0.109822383773956	0.0393784210022581	-2.78889759870409	69	0.00682968864972898	-0.188380184206573	-0.0312645833413388	0.0214818262928345
BABAM2	70	0.00387243435953191	0.0453119782721345	0.0854616043527135	69	0.932141916618657	-0.0865224889439016	0.0942673576629654	0.958233941720041
BACE1	69	0.0964136486328761	0.0451260310521598	2.13654173400347	68	0.0362366560070527	0.0063660556695528	0.186461241596199	0.0878855787829043
BACE2	69	0.473191569616995	0.106501573837462	4.44304767119366	68	3.35122797566583e-05	0.260670987875958	0.685712151358031	0.000204728556750811
BACH1	69	0.81862651485298	0.0845461540558821	9.68259909625098	68	2.00668346622086e-14	0.649917291162586	0.987335738543374	2.54355729415492e-12
BACH2	54	0.299887394620012	0.10161436889074	2.95123020389434	53	0.00470569182211374	0.0960747811506582	0.503700008089365	0.015588577267466
BAD	69	0.0135504645350598	0.0559781964786083	0.24206682936343	68	0.809456938617475	-0.0981522873754786	0.125253216445598	0.87771294971955
BAG1	70	-0.0113548294199502	0.0548928780892583	-0.206854328196942	69	0.836732846329045	-0.120863124886157	0.0981534660462562	0.89627447438596
BAG2	66	-0.613127322940647	0.0755601987924483	-8.11442178209204	65	1.82788514444988e-11	-0.764031460314681	-0.462223185566613	7.49466696380542e-10
BAG3	69	-0.048538146137178	0.074668556053531	-0.650048008192101	68	0.517851343538045	-0.197536929896727	0.100460637622371	0.656286265346565
BAG4	70	-0.0303024634809067	0.0464632460590555	-0.652181370246751	69	0.516450940356459	-0.122994103177419	0.0623891762156055	0.655222761323894
BAG5	70	-0.078657170717205	0.0505318110703351	-1.55658720815928	69	0.124143677643233	-0.179465375529035	0.0221510340946253	0.233927097972262
BAG6	70	0.134685607228167	0.0371056833428956	3.6297837714921	69	0.000540096546165147	0.0606617943688364	0.208709420087498	0.00236580205115231
BAHCC1	68	-0.00596154208332576	0.0661963898941683	-0.0900584169749558	67	0.928509479980889	-0.138090089318401	0.12616700515175	0.955828721224062
BAHD1	70	-0.0324699890008999	0.043661799580351	-0.74367042387122	69	0.459600785459174	-0.119572895889052	0.0546329178872525	0.606295844368445
BAIAP2	70	-0.00499829085723889	0.0662843203887778	-0.0754068357029594	69	0.94010922563234	-0.13723189191033	0.127235310195853	0.963566345207308
BAIAP2-DT	68	0.0439198256727723	0.0660336624796307	0.665112671681965	67	0.508261518857525	-0.0878839162834574	0.175723567629002	0.64794580524699
BAIAP2L1	65	0.219515742247287	0.0514432261035905	4.26714572303943	64	6.67089067060482e-05	0.116746083946374	0.3222854005482	0.000375377211708159
BAIAP3	46	0.953432645684424	0.171000086053576	5.57562670106319	45	1.32584057803414e-06	0.609020792865	1.29784449850385	1.17592145949434e-05
BAK1	70	-0.389538236940101	0.0590269168953889	-6.59933226108462	69	7.02453108288976e-09	-0.507293714168473	-0.271782759711729	1.22884975142477e-07
BAMBI	67	0.134411137830066	0.10702523288457	1.25588269427109	66	0.213586236965212	-0.0792716340773524	0.348093909737483	0.35118003916406
BANF1	70	-0.294465103805404	0.0562367073939843	-5.23617255438576	69	1.68527015577469e-06	-0.40665426538176	-0.182275942229047	1.45919664106079e-05
BANK1	27	0.19345378235457	0.12604408695181	1.53481045428598	26	0.136910792284094	-0.0656335489417388	0.452541113650878	0.252051029195045
BANP	70	0.125001735180349	0.0628710596586208	1.98822376875923	69	0.050755541987215	-0.000422597028549854	0.250426067389249	0.1152717756077
BAP1	70	-0.144453466909023	0.0395043213113902	-3.65664975662734	69	0.000494869985017174	-0.223262431586104	-0.065644502231942	0.00219500220108997
BARD1	69	-0.333352990573133	0.0715027772112726	-4.66209850266597	68	1.50975848783692e-05	-0.476034561009177	-0.190671420137088	0.000101352507262911
BATF3	44	-0.242973446125615	0.153114343133795	-1.58687580244066	43	0.119868042837232	-0.551757947513431	0.065811055262201	0.227646654641735
BAX	NA	NA	NA	NA	NA	NA	NA	NA	NA
BAZ1A	70	-0.350754139586099	0.0551529873173361	-6.35965804658865	69	1.88459850119169e-08	-0.460781338764286	-0.240726940407911	2.89703145900444e-07
BAZ1B	69	-0.340596678882314	0.0635679051442322	-5.35799753208036	68	1.0807587479321e-06	-0.467444458633709	-0.21374889913092	9.86153457286291e-06
BAZ2A	70	0.151959790894844	0.0415121563673311	3.6606094260724	69	0.000488517320729509	0.0691453048786216	0.234774276911065	0.0021698620761758
BAZ2B	70	0.197631840934385	0.054053322678284	3.6562385278451	69	0.00049553422925323	0.0897984126860307	0.30546526918274	0.00219663075005898
BBC3	68	0.568261367113956	0.124797957580544	4.55345085873865	67	2.28820086650607e-05	0.319163601217896	0.817359133010016	0.00014610498451594
BBIP1	69	0.16056975233832	0.0510883420491902	3.14298225187492	68	0.00247805523362766	0.0586245530209001	0.26251495165574	0.00895685533523363
BBOF1	57	0.32101302147636	0.0711487542087444	4.51185723553971	56	3.34077042625879e-05	0.178484939950104	0.463541103002615	0.000204233326132808
BBOX1-AS1	42	0.0204339270117581	0.0986486901023289	0.207138351158661	41	0.836927176203128	-0.17879114433027	0.219658998353786	0.896413260383283
BBS1	66	0.139442004950302	0.053005663738276	2.63070010100844	65	0.0106283388038263	0.0335823845391114	0.245301625361492	0.0312800598841016
BBS10	66	-0.0364219855016715	0.0535972448618495	-0.679549584974967	65	0.499202632474009	-0.14346307500064	0.0706191039972967	0.640778106588679
BBS12	64	0.164686391075973	0.0751968123911155	2.19007143839292	63	0.0322288719667898	0.0144175522064806	0.314955229945465	0.0798504230947539
BBS2	70	0.303441609155805	0.0441031380093119	6.88027253506853	69	2.1906155722567e-09	0.215458256192287	0.391424962119324	4.39351126797452e-08
BBS4	70	-0.0665020423215999	0.0525329998035788	-1.26590985799881	69	0.209802920047004	-0.171302509421579	0.0382984247783791	0.346841002322254
BBS5	70	-0.02087057525908	0.0514657899926696	-0.405523266271686	69	0.686347631040242	-0.123542017039828	0.0818008665216681	0.788347304874413
BBS7	70	-0.0412121728145422	0.0481980058265818	-0.855059708545309	69	0.395477387482069	-0.137364563555594	0.0549402179265092	0.548897472727271
BBS9	67	0.214074380070949	0.060793463678782	3.52133876105606	66	0.000784098944889415	0.0926963135850228	0.335452446556874	0.0032785829963312
BBX	70	0.354303890877415	0.0434758459024952	8.14944214477217	69	1.06528784130593e-11	0.267571951426323	0.441035830328506	4.84715235546036e-10
BCAM	57	0.182528596813872	0.0679670229284119	2.6855464451654	56	0.00951010574026986	0.0463742889448099	0.318682904682933	0.0284884124542797
BCAP29	67	-0.00233158583409321	0.0686318726947216	-0.0339723475776953	66	0.97300173650188	-0.139359540862439	0.134696369194253	0.984541762571148
BCAP31	70	-0.0409610569067623	0.0469562068975968	-0.87232465339654	69	0.386056738389145	-0.13463612656795	0.0527140127544252	0.53977375171434
BCAR1	70	0.266020288261805	0.0617232598017496	4.30988721458072	69	5.31431889411326e-05	0.142885754114831	0.389154822408778	0.000307305061807144
BCAR3	69	0.0474424071926707	0.074111117969098	0.640152361653116	68	0.5242247318989	-0.100444026188196	0.195328840573538	0.661651846205784
BCAS2	70	-0.2552129185	0.0442806735832685	-5.76352837135776	69	2.11187818411059e-07	-0.343550445242802	-0.166875391757199	2.32254248289247e-06
BCAS3	69	0.109264469817156	0.0616579559275686	1.77210658662626	68	0.0808565022183293	-0.0137720656117778	0.23230100524609	0.167434553043968
BCAS4	63	-0.149257090901097	0.0778860293800111	-1.91635254857917	62	0.0599329265580427	-0.304949045206564	0.00643486340437066	0.132045309585866
BCAT2	69	-0.15140951893687	0.0632138368504672	-2.39519583813636	68	0.0193712440467235	-0.277550766408452	-0.0252682714652876	0.0521535302153684
BCCIP	70	-0.399853866210052	0.0528298488267621	-7.56871115647595	69	1.22778187375193e-10	-0.505246530907809	-0.294461201512294	3.80372311781638e-09
BCDIN3D	69	-0.127531261486513	0.0748965615711487	-1.70276523796574	68	0.0931792747026121	-0.276985023172663	0.0219225001996367	0.186965415780492
BCKDHA	70	0.838946795886375	0.0851762685306186	9.84953685291808	69	8.68370981827652e-15	0.669024789505274	1.00886880226748	1.25079254018838e-12
BCKDHB	67	0.0472557865563706	0.0578737913303754	0.816531723083574	66	0.417133589911692	-0.0682929660037276	0.162804539116469	0.569126417235893
BCKDK	70	0.486700264511134	0.0608984835721975	7.99199316571048	69	2.06760258426021e-11	0.365211113921795	0.608189415100473	8.39991950990111e-10
BCL10	70	0.354634184987909	0.0548377408670859	6.46697291647117	69	1.21257271597286e-08	0.245235885270277	0.464032484705541	1.96473980903652e-07
BCL2L1	69	-0.102582615683897	0.0568684174063005	-1.80385916054227	68	0.0756826409859676	-0.216061775797754	0.0108965444299599	0.158826144025613
BCL2L11	69	0.175890013265551	0.11540010108954	1.52417555621616	68	0.132102419846344	-0.0543873031424897	0.406167329673592	0.245369202489847
BCL2L12	69	-0.413771710559946	0.0654914170946657	-6.3179532359462	68	2.34617131658785e-08	-0.544457798647665	-0.283085622472227	3.51165803944344e-07
BCL2L13	70	0.0400493042608176	0.0403583148873373	0.992343321880946	69	0.32449737243123	-0.0404633309851302	0.120561939506765	0.476334804717631
BCL2L2	69	0.218568362430911	0.0586732915789285	3.72517642268098	68	0.000398933229797165	0.101487631980435	0.335649092881387	0.00181669819407939
BCL3	67	0.37523586513938	0.106296535583008	3.53008555811638	66	0.000762640233829949	0.163007984336448	0.587463745942312	0.00319779623737032
BCL6	67	0.709183201285514	0.0843111708093204	8.41149748577701	66	4.8623909070353e-12	0.540850517527415	0.877515885043614	2.4513080704513e-10
BCL7A	70	-0.0615554991635202	0.0689493786169679	-0.892763653541787	69	0.375086850149018	-0.199105745909933	0.0759947475828929	0.528796625008021
BCL7B	70	-0.0779315771837889	0.0455121035137915	-1.71232641796425	69	0.0913276019851302	-0.168725739420513	0.0128625850529355	0.184183004567157
BCL7C	68	-0.0393642715144792	0.0544211048858381	-0.723327312024546	67	0.471996583930133	-0.147989251501899	0.0692607084729406	0.616742944435569
BCL9	68	-0.0988298857888502	0.0496504936031137	-1.99051164685002	67	0.0506162851797167	-0.197932685802145	0.000272914224444309	0.115037954698409
BCL9L	69	0.15498007744246	0.0440554245315438	3.51784324156254	68	0.000780368129060567	0.067068846528812	0.242891308356108	0.00326482946790296
BCLAF1	70	-0.266581950272946	0.05727075663882	-4.65476564163721	69	1.52187070317056e-05	-0.380833983649282	-0.152329916896609	0.0001020191475906
BCLAF3	66	0.132220660050982	0.0600294664228385	2.20259595711946	65	0.0311754282175226	0.0123335370373865	0.252107783064578	0.0776393116336686
BCO2	34	0.275634925540708	0.141020412478661	1.95457466544012	33	0.0591491420395925	-0.0112732608997447	0.56254311198116	0.13060384916606
BCOR	69	0.314217082198288	0.0515954963411774	6.09000987451528	68	5.91539222063773e-08	0.211259872247766	0.417174292148809	7.75962331390811e-07
BCORL1	69	0.256098793827729	0.0514297807124652	4.97958167971846	68	4.61629795911012e-06	0.153472264265755	0.358725323389703	3.55798197807438e-05
BCR	70	-0.0158957356526057	0.0637786134475236	-0.249233007639536	69	0.803920975237852	-0.14313058813164	0.111339116826428	0.874403014255469
BCS1L	57	-0.637072261913055	0.0814237460885989	-7.82415809289644	56	1.50605091593245e-10	-0.800183625558867	-0.473960898267244	4.54982067284907e-09
BCYRN1	67	-0.603976234678906	0.245595793148923	-2.45922874710101	66	0.0165525290406174	-1.09432405672442	-0.113628412633394	0.0457074815360358
BDH1	66	-0.250918892742085	0.108157830621337	-2.31993274366382	65	0.0234955315139278	-0.466924996365398	-0.0349127891187716	0.0613800353364677
BDH2	69	0.0312231152834841	0.0684213530708792	0.456335834971568	68	0.649602705830213	-0.105309569015847	0.167755799582816	0.75959342228391
BDNF	56	-0.0408660514385251	0.104007384810415	-0.392914902273677	55	0.695901136726669	-0.249301508391385	0.167569405514334	0.796433753733927
BDP1	70	0.0331978740516516	0.0439845155962567	0.754762752337255	69	0.452959810662417	-0.0545488336728135	0.120944581776117	0.600786565421773
BECN1	70	-0.13033026386068	0.0389145841425299	-3.34913674994771	69	0.00131663210219219	-0.207962735076624	-0.0526977926447347	0.00516363742765685
BEGAIN	40	0.409599362655811	0.107310522879747	3.81695430852397	39	0.00047139126862624	0.192543342402549	0.626655382909072	0.00210481238203279
BEND3	68	-0.695915724914703	0.102441475732938	-6.79330046678493	67	3.54428605312086e-09	-0.900389766276327	-0.49144168355308	6.7253510034497e-08
BEND6	59	-0.155696578698963	0.0901110570110856	-1.72782990082792	58	0.0893402813740403	-0.336073457032861	0.0246802996349355	0.181197823765286
BEND7	51	0.187327307058955	0.0870774432879711	2.15127247638003	50	0.0363109349727394	0.0124271148844632	0.362227499233446	0.0880176111425314
BET1	70	0.191861558779393	0.0565167054654641	3.39477606132994	69	0.00114228311418042	0.0791138163340988	0.304609301224686	0.00455967681100414
BET1L	70	0.097140540159999	0.0431350847825376	2.25200763252758	69	0.0275071885815729	0.0110884005428137	0.183192679777184	0.070069414000511
BEX2	45	0.0748985305661147	0.1400175399862	0.534922485950664	44	0.595396632889644	-0.207288279375456	0.357085340507686	0.718870461068914
BEX3	69	-0.0347920681583087	0.0452002523698667	-0.769731723478236	68	0.444124782245814	-0.124987767455166	0.0554036311385484	0.593182557790019
BFAR	70	0.0698397428256425	0.0392723555816258	1.7783436157906	69	0.0797528456346668	-0.00850646288238305	0.148185948533668	0.165581956371039
BFSP1	62	0.493202903705495	0.102275189167846	4.82231230974396	61	9.82719930704047e-06	0.288691023285652	0.697714784125339	6.94684462721932e-05
BFSP2-AS1	67	0.2716431666107	0.0672907575809296	4.03685701240618	66	0.000143444829935198	0.13729283430027	0.405993498921129	0.000741009133121231
BHLHB9	62	-0.00197363298493524	0.0615473419092495	-0.03206690855708	61	0.974523386723588	-0.125045149460418	0.121097883490548	0.985586913067187
BHLHE40	70	2.16232912773327	0.152260006403155	14.201556789692	69	3.65671601638402e-22	1.8585787260551	2.46607952941144	4.5062930375239e-19
BHLHE41	60	1.53838882415293	0.215659729670143	7.13340792231323	59	1.60816979852633e-09	1.10685470184321	1.96992294646265	3.36215103401612e-08
BICD1	69	0.176405214783761	0.0853133787879421	2.06773213404477	68	0.0424727699628863	0.00616501797711683	0.346645411590406	0.0998972519686931
BICD2	70	-0.127971713462441	0.0394767852028614	-3.24169541174202	69	0.00183112872890501	-0.206725745106062	-0.0492176818188192	0.00688909387119589
BICDL1	37	-0.238309740738593	0.13529288814155	-1.76143583016176	36	0.0866565304885874	-0.512696435553789	0.0360769540766029	0.177064771490222
BICDL2	15	3.43901320318492	0.947358472453726	3.63010761309563	14	0.00273044757338547	1.40713136278002	5.47089504358981	0.00975010490258991
BICRA	66	0.0750942960074419	0.0584126811944873	1.28558207690232	65	0.203150366515678	-0.0415638839368855	0.191752475951769	0.338538158669578
BICRAL	69	0.277032957345508	0.0484850323334184	5.71378307928985	68	2.66988870257274e-07	0.1802825816848	0.373783333006216	2.83637314178489e-06
BID	70	-0.209696609809378	0.0604165550114064	-3.47084685265136	69	0.000899208018941913	-0.330224339225957	-0.0891688803927981	0.00369648485473861
BIK	31	0.367690046539424	0.248888396804224	1.47732900071131	30	0.150009501282877	-0.140607870946815	0.875987964025663	0.270617335512099
BIN1	68	-0.113594602469999	0.0688079449567105	-1.65089369463752	67	0.103440508972415	-0.250935835426906	0.0237466304869077	0.203054634515586
BIN3	70	-0.101533246223548	0.0543154943883498	-1.86932379732378	69	0.065821818422907	-0.209889692722869	0.0068232002757731	0.142153595195884
BIRC2	70	0.246672463646954	0.0537440095798335	4.58976666563251	69	1.93290012375389e-05	0.139456098146185	0.353888829147722	0.000125956493963304
BIRC3	59	0.805830603327639	0.155055844343172	5.19703469895765	58	2.74062253148197e-06	0.49545260868701	1.11620859796827	2.25240789156476e-05
BIRC5	70	-0.537748785247019	0.120349499528746	-4.46822618583949	69	3.00993071011553e-05	-0.777839467542341	-0.297658102951697	0.000186109120159657
BIRC6	69	0.0346021641837061	0.0413894709515295	0.836013686288189	68	0.406075313560103	-0.047989239188389	0.117193567555801	0.559122080248311
BIVM	70	-0.128787013915386	0.0460099584730342	-2.79911171819176	69	0.00663897799845163	-0.22057436962044	-0.0369996582103325	0.0209899957185938
BLACAT1	25	0.426199692629173	0.232842894661793	1.83041742909198	24	0.079634465780568	-0.0543644227486074	0.906763808006953	0.165398101118404
BLCAP	70	0.125716705374406	0.107222548815045	1.17248383631751	69	0.245035014767146	-0.0881864267802805	0.339619837529092	0.388601322482651
BLM	70	-0.558864918836782	0.0782690630912087	-7.14030418615749	69	7.40296238092046e-10	-0.715007427395328	-0.402722410278236	1.72130515234358e-08
BLMH	70	-0.341676129006293	0.0516863397587477	-6.61056926455051	69	6.70574102514851e-09	-0.444787555531681	-0.238564702480904	1.1834063123114e-07
BLOC1S1	70	-0.0671187866716059	0.0560771378414629	-1.19690107689446	69	0.235441271735892	-0.178989615700769	0.0447520423575571	0.377761901601849
BLOC1S1-RDH5	40	0.0756909537798725	0.128266340532185	0.590107688937142	39	0.558522350456571	-0.183752208560922	0.335134116120667	0.690016045444729
BLOC1S2	70	-0.210458545546248	0.0443009605366342	-4.75065422954457	69	1.06664242271175e-05	-0.298836543653653	-0.122080547438843	7.47323506651678e-05
BLOC1S3	70	-0.0222158088283884	0.0599407411718262	-0.370629531668696	69	0.71204888666538	-0.141794315607253	0.0973626979504758	0.808324892733442
BLOC1S4	69	0.0569905470752195	0.0650207436522069	0.876497927800695	68	0.38384534056744	-0.0727563267812236	0.186737420931663	0.537359251780811
BLOC1S5	65	0.492148310731478	0.102539892123108	4.79957897888764	64	9.91945979557313e-06	0.287301327486607	0.696995293976348	6.99851963057898e-05
BLOC1S5-TXNDC5	65	0.0322865802962113	0.111567920637407	0.289389459907045	64	0.773218775200952	-0.1905959632317	0.255169123824122	0.852546916766454
BLOC1S6	70	0.160046538938578	0.0400809559119565	3.99308188382888	69	0.00016066432534152	0.0800872197089048	0.240005858168251	0.000818336639431824
BLVRA	70	-0.284442712380744	0.0574179803688116	-4.95389615854981	69	4.97064132891037e-06	-0.398988449062222	-0.169896975699266	3.79548247703579e-05
BLVRB	69	0.0914473529456941	0.0620133363737819	1.47464010635552	68	0.14492433855002	-0.0322983331224959	0.215193039013884	0.263522557399504
BLZF1	69	-0.00976066218191674	0.0471691103807449	-0.206929113208401	68	0.836683613783519	-0.103885156469878	0.0843638321060446	0.89627447438596
BMF	66	0.495067896213649	0.154759103978769	3.19895814518006	65	0.00213285910277611	0.185992622988871	0.804143169438428	0.00786028918720379
BMI1	69	-0.165535041209605	0.0553789624963167	-2.98913222183632	68	0.00389125246908738	-0.276042040325824	-0.0550280420933869	0.0132671014862121
BMP1	70	0.358044033086191	0.0621184548003437	5.76389149145755	69	2.10881391405748e-07	0.2341211064887	0.481966959683683	2.32254248289247e-06
BMP2K	66	-0.217868323272633	0.0628940860560663	-3.46405102505848	65	0.000946858737418595	-0.343476486748872	-0.0922601597963938	0.00386870888071823
BMP4	60	0.138800112014673	0.130266857819023	1.06550594939125	59	0.29098809356403	-0.121863268399273	0.399463492428619	0.440563640122675
BMP6	56	0.150002444814115	0.129283520469156	1.16025959279088	55	0.250954863139271	-0.109087519947353	0.409092409575583	0.39533277282546
BMP7	65	0.150234305254696	0.0681645457123519	2.20399481408811	64	0.0311284785247401	0.0140599709120364	0.286408639597355	0.0775397990607283
BMP8A	48	0.154549399599627	0.096995569975329	1.59336554895174	47	0.117782027894692	-0.0405805181720532	0.349679317371306	0.2245694466873
BMP8B	53	-0.0515365809369249	0.0881012786637981	-0.584969727097751	52	0.561097923174461	-0.228324730289485	0.125251568415635	0.692074851637894
BMPR1A	55	-0.027273723044432	0.0581746680478726	-0.468824730069592	54	0.641082151442661	-0.143906910110827	0.0893594640219634	0.753959153561188
BMPR2	70	0.322763528935768	0.0530135829016655	6.08831758333444	69	5.70405590392144e-08	0.217004324787683	0.428522733083853	7.51350166631742e-07
BMS1	70	-0.197376059974298	0.0407974358767719	-4.83795257551161	69	7.69667538158556e-06	-0.278764717624796	-0.115987402323801	5.59212752421654e-05
BMS1P1	66	-0.00457718019615101	0.0546310061452962	-0.0837835602730357	65	0.933486022642046	-0.113682833542519	0.104528473150217	0.95909285862175
BMS1P14	69	0.03224211043243	0.0558055253151676	0.577758389520379	68	0.565335556746935	-0.0791160815361086	0.143600302400969	0.695406938377447
BMS1P2	64	-0.134312588689791	0.059468528913586	-2.25854903666713	63	0.0273826421267035	-0.253150961021877	-0.0154742163577055	0.06980024909843
BMS1P20	69	-0.154303260435692	0.0533327994844862	-2.89321509328563	68	0.00511891631020197	-0.260727204833162	-0.0478793160382218	0.0167749645085052
BMS1P4	59	0.00690517794165739	0.0706098753830502	0.097793373861625	58	0.922433544077964	-0.134435844165911	0.148246200049225	0.952003948947908
BMT2	70	0.803550209654645	0.0615249496480777	13.0605585904734	69	2.52130445387804e-20	0.680811293439509	0.926289125869782	1.99741340699724e-17
BNIP1	69	-0.165888795218901	0.0553731748369589	-2.99583319373225	68	0.00381662784519715	-0.276384245240685	-0.0553933451971166	0.0130467620376272
BNIP2	66	0.0573819578965024	0.0520925139317346	1.10153942602385	65	0.274724248940841	-0.0466539764200033	0.161417892213008	0.423131043605454
BNIP3	69	2.15345849058668	0.144433662813305	14.9096716696179	68	4.062139055539e-23	1.86524560379011	2.44167137738324	6.43616918071187e-20
BNIP3L	70	1.84417385141055	0.116334456962172	15.8523441770154	69	1.07322047739138e-24	1.61209295987487	2.07625474294622	2.97577207868696e-21
BOC	47	0.479521497800109	0.107406976959513	4.46452838888542	46	5.1676541541019e-05	0.263322466585064	0.695720529015154	0.000299605082191031
BOD1	69	-0.0256559044742339	0.0410419698414248	-0.625113866935761	68	0.533988516051353	-0.107553880177478	0.0562420712290099	0.669394363551914
BOD1L1	70	0.230508405633887	0.0392667892705045	5.87031458176884	69	1.37632229948484e-07	0.152173304412712	0.308843506855062	1.60344439323386e-06
BOK	58	0.427526365976535	0.073769525107921	5.79543334935512	57	3.10362104666002e-07	0.279805439999622	0.575247291953447	3.25198498143658e-06
BOLA1	65	0.158481215085999	0.0674413845282506	2.34991046216753	64	0.0218738557911305	0.0237515612856706	0.293210868886328	0.0577282414228265
BOLA2-SMG1P6	70	-0.299599819574244	0.0509548769928436	-5.87970842548244	69	1.32530396396601e-07	-0.401252017808471	-0.197947621340017	1.54907308914035e-06
BOLA2B	70	-0.460205930314847	0.0534096642910315	-8.61652916983649	69	1.49186723272441e-12	-0.566755295214657	-0.353656565415037	8.89585993448730e-11
BOLA3	70	-0.342696843248136	0.0672896235891142	-5.0928631335601	69	2.92698734209494e-06	-0.476935969311531	-0.208457717184741	2.38262140265505e-05
BOP1	70	-0.767155905075604	0.091471834460632	-8.38679916718818	69	3.92120681083364e-12	-0.94963722184429	-0.584674588306918	2.06114240468986e-10
BORA	67	-0.526023541757951	0.103783547488396	-5.0684675412234	66	3.46821908838694e-06	-0.733234079945929	-0.318813003569973	2.76933174293013e-05
BORCS5	69	-0.0643772289517312	0.0550015509325156	-1.17046206625553	68	0.245900756624183	-0.174131115018022	0.0453766571145598	0.389612184531258
BORCS6	68	0.00169621397688009	0.0579065902971214	0.0292922440809714	67	0.976718592397539	-0.113885824009294	0.117278251963055	0.98659252352287
BORCS7	70	-0.0756983916252695	0.0514956371709224	-1.469996212961	69	0.146108097407811	-0.178429376897427	0.0270325936468879	0.265179864188922
BORCS8	70	-0.317141036735142	0.0607263025909132	-5.22246577190093	69	1.77708735981074e-06	-0.438286695665299	-0.195995377804985	1.52788185330705e-05
BORCS8-MEF2B	51	0.0163360623869866	0.0945483963108607	0.172779899230402	50	0.863521961704688	-0.173569980557707	0.20624210533168	0.914302823605413
BPGM	69	-0.246421272405931	0.0584988441867616	-4.21241266954291	68	7.60740290639241e-05	-0.36315389850517	-0.129688646306693	0.000421552363901065
BPHL	70	-0.00612667003319454	0.0622105924131805	-0.0984827469975433	69	0.92183451333153	-0.130233406138974	0.117980066072585	0.951518528372266
BPNT1	70	-0.0517582255670375	0.045888525616522	-1.12791214953313	69	0.263263790994452	-0.143303329351749	0.0397868782176741	0.41000613717889
BPTF	70	0.0988528211558186	0.0379224847428807	2.60670738813803	69	0.0111931684509878	0.0231995340885347	0.174506108223103	0.0327166771089488
BRAF	69	0.230425720859348	0.0479219103387347	4.80835841540102	68	8.78223960371777e-06	0.134799037643636	0.32605240407506	6.28879819038837e-05
BRAP	69	-0.0642521634319013	0.0448902154612975	-1.43131777764125	68	0.15691923760482	-0.153829193710112	0.0253248668463096	0.280169989545469
BRAT1	70	-0.177279426451788	0.045869088460792	-3.86489970480497	69	0.0002482156497946	-0.268785754171793	-0.0857730987317826	0.00119798075364313
BRCA1	70	-0.617769357152177	0.103805368608467	-5.95122743104243	69	9.93529057233412e-08	-0.824855401321155	-0.4106833129832	1.20626499986599e-06
BRCA2	69	-0.436196292486616	0.114881332960222	-3.79692924208715	68	0.000314701784794336	-0.665438423209985	-0.206954161763246	0.00147583826433572
BRCC3	70	-0.0418040537795356	0.0512542944899643	-0.815620509374506	69	0.417523855211986	-0.144053573576846	0.0604454660177748	0.569378713655003
BRD1	69	0.0652064055320777	0.0447825515950645	1.45606722282578	68	0.149975806781292	-0.0241557848460276	0.154568595910183	0.270617335512099
BRD2	70	0.07027380146925	0.0386878941955173	1.81642870284195	69	0.0736482903779815	-0.0069064356762512	0.147454038614751	0.155498417776926
BRD3	70	0.0785702845979249	0.0432116725915997	1.81826529466945	69	0.0733640544532303	-0.00763464351780202	0.164775212713652	0.155045870415544
BRD3OS	69	0.0916017798483219	0.0466193182000242	1.9648888783679	68	0.0535143169527062	-0.00142562122426833	0.184629180920912	0.120421835245272
BRD4	70	0.0218066905056968	0.0470646759593676	0.463334551044677	69	0.644582775258055	-0.0720847690129515	0.115698150024345	0.756405372006847
BRD7	70	-0.175417751690481	0.0385794243382628	-4.54692506949884	69	2.26090293086527e-05	-0.252381597391575	-0.0984539059893869	0.000144570045582166
BRD8	70	-0.106173740385625	0.040911833484635	-2.59518411526337	69	0.011540134503252	-0.187790615019428	-0.0245568657518215	0.033580383517137
BRD9	70	-0.197305090770209	0.0420489247055461	-4.69227434831848	69	1.3248381341623e-05	-0.281190400321728	-0.11341978121869	9.02289207614008e-05
BREA2	49	0.129326642176397	0.107240236798641	1.20595259799012	48	0.233746649824207	-0.0862943053468039	0.344947589699599	0.375559045806211
BRF1	67	-0.134653075200468	0.0483663287072238	-2.78402514310244	66	0.00699733873818837	-0.231219566172663	-0.0380865842282736	0.0219168268695982
BRF2	70	-0.0705443472982555	0.0529712217380582	-1.33174854163448	69	0.187325493033057	-0.176219043237224	0.0351303486407127	0.31946291123697
BRI3	69	0.259686869005225	0.0820924719761896	3.16334570946464	68	0.00233197129371268	0.0958738916724638	0.423499846337987	0.00849249503154403
BRI3BP	70	-0.481020516117744	0.075141106830243	-6.40156282505199	69	1.58678203774942e-08	-0.63092292267482	-0.331118109560667	2.48925029429686e-07
BRICD5	52	-0.0181994730677074	0.115256128134187	-0.157904602230943	51	0.875155528506867	-0.249585805339344	0.213186859203929	0.921211974248533
BRIP1	70	-0.328912530247244	0.0741517194874431	-4.43566963140946	69	3.38585583756611e-05	-0.476841163061037	-0.180983897433452	0.000206332566452998
BRIX1	70	-0.607483431744507	0.0653224341812601	-9.29976721410643	69	8.52191156824856e-14	-0.737798122318057	-0.477168741170958	8.21882793073433e-12
BRK1	70	0.307268729485275	0.0494452568665723	6.21432163482207	69	3.41548130707618e-08	0.208628141000507	0.405909317970043	4.87216761116166e-07
BRMS1	70	-0.483302124006548	0.0665108751964151	-7.2665127707205	69	4.36485104654909e-10	-0.615987689534406	-0.35061655847869	1.1193193747347e-08
BRMS1L	69	-0.158279276904899	0.0544795240409205	-2.90529845279142	68	0.00494662308740818	-0.266991474527641	-0.0495670792821569	0.0162846532093927
BROX	70	0.106718074629975	0.0411961493720657	2.59048664150972	69	0.0116843522815548	0.0245340053201	0.188902143939851	0.0339421558812793
BRPF1	70	-0.142286889070971	0.0447764041561698	-3.17772031391147	69	0.00222165805574903	-0.231613371247311	-0.0529604068946314	0.00814155278252517
BRPF3	69	0.0109256934806686	0.0443604854655605	0.246293370462566	68	0.806197097570329	-0.0775942770490026	0.0994456640103397	0.875885633439022
BRSK1	50	0.576910829362392	0.110959213155048	5.19930533894693	49	3.89192969040059e-06	0.353929942274662	0.799891716450122	3.06572387757336e-05
BRSK2	48	0.592657320311234	0.137037574616264	4.32477969615858	47	7.89430370808237e-05	0.31697327955243	0.868341361070038	0.000435817433680147
BRWD1	70	0.251366397470496	0.0505771155133038	4.96996309337524	69	4.67683774658823e-06	0.150467812767882	0.352264982173111	3.59465055075607e-05
BRWD3	70	0.486096150234218	0.0640346373787096	7.59114395166133	69	1.11728969770342e-10	0.358350543987507	0.61384175648093	3.51044193689196e-09
BSCL2	69	-0.145182914541601	0.108134631985567	-1.34261255506911	68	0.18386236906378	-0.360962213080401	0.0705963839971986	0.315107399410707
BSDC1	70	0.2121579418506	0.0416299270680907	5.09628425492051	69	2.88886471069672e-06	0.129108509714864	0.295207373986336	2.36025035037476e-05
BSG	70	0.193050203725279	0.0536388820237551	3.59907209922426	69	0.000596613679212273	0.0860435619605103	0.300056845490047	0.00258276437007936
BSN	42	-0.233119084988446	0.149784367685713	-1.55636458323603	41	0.127307745847106	-0.535614752261398	0.0693765822845058	0.238266994463424
BSPRY	19	0.611313537728094	0.127895219023421	4.77979976418155	18	0.000149864306922513	0.342615653240334	0.880011422215854	0.000770760504557196
BTAF1	69	0.238109615477075	0.055284224966144	4.30700829437137	68	5.44906619005885e-05	0.127791662158957	0.348427568795194	0.000313951133059443
BTBD1	70	-0.04512301769284	0.0392126067987585	-1.15072731390734	69	0.253816727534359	-0.123350027840426	0.0331039924547463	0.398764972743618
BTBD10	69	-0.101809222784631	0.0428463869755935	-2.37614487407362	68	0.0203173960731307	-0.187307856818448	-0.0163105887508139	0.0543577951627289
BTBD11	46	0.397055477896059	0.13300148492146	2.98534620219111	45	0.00456838713205858	0.129176736389561	0.664934219402556	0.0152064770953366
BTBD19	45	0.514618080771229	0.118805991206774	4.33158358045739	44	8.44412140373526e-05	0.275180338443445	0.754055823099013	0.000462601879421229
BTBD2	69	0.361761577222482	0.050963513332988	7.09844266149364	68	9.42804247274698e-10	0.260065469729994	0.46345768471497	2.10819393276687e-08
BTBD3	70	0.0132235098938239	0.0541860692286867	0.244038921480269	69	0.807924853157011	-0.0948747404766281	0.121321760264276	0.876792532739058
BTBD6	67	-0.165686705584555	0.0530827407622255	-3.12129146320306	66	0.00267134168783519	-0.271669817050884	-0.0597035941182265	0.00957791011880571
BTBD7	70	0.00754954723741799	0.0417318902812769	0.180905949539629	69	0.856971724838541	-0.0757032959429736	0.0908023904178096	0.910534802468785
BTBD8	57	0.301673912756657	0.0959697192060654	3.14342810682716	56	0.00267005658747036	0.10942346346667	0.493924362046643	0.00957594102235531
BTBD9	66	0.162456273074826	0.0544857911941316	2.98162639312694	65	0.00403213488032253	0.0536406340122946	0.271271912137358	0.0136731654795998
BTC	25	-0.402936914028382	0.143646711323629	-2.80505491782951	24	0.00981325092882358	-0.699409154911816	-0.106464673144948	0.0292380835598609
BTD	69	0.0543587060048439	0.0538933363107895	1.00863501363825	68	0.316725393519514	-0.0531837722144365	0.161901184224124	0.468609578883599
BTF3	70	0.046156265518955	0.0366596846436584	1.25904698765431	69	0.21225621819323	-0.0269778042801885	0.119290335318098	0.349652922069854
BTF3L4	70	-0.0929138792753567	0.0411612975076726	-2.25731172002139	69	0.0271568829516399	-0.175028421018153	-0.0107993375325603	0.0693602737631867
BTG1	70	1.00862532137632	0.0895554099442347	11.2625839355141	69	2.7621365039886e-17	0.829967166910015	1.18728347584262	1.03846969375382e-14
BTG2	64	0.16695039703702	0.0976235064099776	1.71014546779235	63	0.0921600493559832	-0.0281346137250715	0.362035407799112	0.18545715456903
BTG3	69	-0.0898388335773863	0.0527027914160128	-1.70463140876615	68	0.0928285144071414	-0.195005616447667	0.0153279492928948	0.186464013997936
BTN2A1	69	0.185340383202808	0.0528647069564827	3.50593796642772	68	0.000810480823409483	0.079850502902004	0.290830263503613	0.00337680045546002
BTN2A2	68	0.176695662618583	0.0778441912272458	2.26986316940164	67	0.0264385971480039	0.0213180066166579	0.332073318620509	0.0678067940729589
BTN2A3P	59	-0.0194101104742252	0.0751170461464827	-0.258398212788804	58	0.797014360259689	-0.169773215102984	0.130952994154534	0.869748243187899
BTN3A1	65	0.0549851099308072	0.0912193147326631	0.602779247925204	64	0.54878560627651	-0.127246420157173	0.237216640018787	0.681817089639607
BTN3A2	70	0.00232257913499017	0.0665447051997098	0.0349025384967864	69	0.972258230738882	-0.130430475402834	0.135075633672814	0.984069367078909
BTN3A3	62	0.0376733250407872	0.0809218691639677	0.465551839447155	61	0.643194253783277	-0.124139953081357	0.199486603162932	0.755525044345512
BTNL9	30	0.28380955753133	0.134763644151138	2.10598013521388	29	0.0439792506017086	0.0081869578315984	0.559432157231061	0.102754132804624
BTRC	70	-0.0449921131389422	0.0452901816641622	-0.99341869442189	69	0.323977025077437	-0.135343553399237	0.0453593271213521	0.475753590012951
BUB1	70	-0.297974450895653	0.116485810818899	-2.55803216547049	69	0.0127261906637616	-0.530357285113864	-0.0655916166774426	0.0365427004923702
BUB1B	70	-0.504589530317263	0.12834290819244	-3.9315731381174	69	0.000198143795818017	-0.7606266265773	-0.248552434057226	0.000983932321207802
BUB3	70	-0.167236982062468	0.0417285818548854	-4.00773222162326	69	0.000152798798811507	-0.250483225112799	-0.0839907390121372	0.000783853597418326
BUD13	69	-0.188609693998466	0.0497260142642659	-3.79297831907684	68	0.000318859061911251	-0.287836410546646	-0.0893829774502865	0.00149249455820118
BUD23	70	-0.271204154485604	0.0417058802960619	-6.50277976535633	69	1.04631203918205e-08	-0.354405109165244	-0.188003199805964	1.71990304912928e-07
BUD31	63	-0.0247886060177378	0.0612370695986798	-0.404797391191171	62	0.687019690203711	-0.147199763932089	0.0976225518966139	0.78895582771271
BVES	63	0.181861409213413	0.0615665051887045	2.95390177915732	62	0.00442936805421224	0.0587917189379047	0.304931099488921	0.014826051332207
BYSL	70	-0.625670501062845	0.0580659412557607	-10.775171942998	69	1.96373756810116e-16	-0.741508884344911	-0.509832117780779	5.00768045005952e-14
BZW1	70	0.0816645872954041	0.0750946771520616	1.08748835992781	69	0.280605238568847	-0.0681451945880595	0.231474369178868	0.429682824929874
BZW2	70	-0.202267756858709	0.0432951875320803	-4.67183002057296	69	1.42892676580776e-05	-0.28863929272204	-0.115896220995377	9.66650000583954e-05
C10orf88	67	-0.0863410400781278	0.053897567858467	-1.60194686901005	66	0.113943171473633	-0.193951006332411	0.0212689261761552	0.218981756162547
C11orf1	70	0.132748558562933	0.058565903227725	2.266652629718	69	0.0265495242255927	0.0159127784371685	0.249584338688697	0.0680440839251412
C11orf24	70	-0.117929744500516	0.0495820274580107	-2.37847765705802	69	0.020157601036657	-0.216843182849595	-0.0190163061514361	0.0539888802457288
C11orf45	46	0.975328864857752	0.158071657078976	6.17016916809099	45	1.74456175299646e-07	0.656956204648975	1.29370152506653	1.97740770592578e-06
C11orf49	69	0.0710051088405908	0.0491907917192912	1.44346342798839	68	0.153481266179092	-0.0271535877476913	0.169163805428873	0.275759067421401
C11orf54	69	0.186735379628365	0.0474466743603676	3.93568953242264	68	0.000197560425171743	0.092057015042582	0.281413744214147	0.000981474882678524
C11orf58	70	-0.131634813308413	0.0366214687412054	-3.59447116222026	69	0.00060555035002265	-0.204692644468174	-0.0585769821486526	0.00261379993465702
C11orf68	68	0.305747398423586	0.0756220910975604	4.04309632259626	67	0.000138651604703156	0.154805072843993	0.456689724003179	0.000718927044302338
C11orf71	67	0.0896981174564685	0.0732579545082824	1.22441471453216	66	0.225148373338915	-0.0565661079199953	0.235962342832932	0.365315830619339
C11orf72	67	0.277528333508863	0.0610305250299242	4.54736926108347	66	2.38296618612762e-05	0.155676958764138	0.399379708253588	0.000151391859500535
C11orf74	68	0.0430001264346187	0.0572202002529262	0.751485074231625	67	0.45499242744993	-0.0712118712892223	0.15721212415846	0.602509821843135
C11orf80	63	0.0830716406727985	0.0560404691852265	1.4823509131986	62	0.143312224401119	-0.0289516610296561	0.195094942375253	0.261207111664134
C11orf95	69	0.0536514397946185	0.0566927674020656	0.946354222120116	68	0.347318768094452	-0.0594772161929821	0.166780095782219	0.500274345056567
C11orf98	68	-0.637510959269584	0.062291193016062	-10.2343674667653	67	2.48793647699055e-15	-0.761844700911846	-0.513177217627322	4.37995293115908e-13
C12orf10	69	-0.183822284404593	0.0466032507895091	-3.94440905495745	68	0.000191807082326269	-0.276817623458691	-0.0908269453504938	0.000957142952074909
C12orf29	69	-0.24956716592729	0.0491024444678965	-5.08258129776937	68	3.12172716483464e-06	-0.347549568320237	-0.151584763534343	2.52446780788779e-05
C12orf4	70	-0.366924711840713	0.0567651991356641	-6.46390248651808	69	1.22799457083879e-08	-0.480168185594055	-0.253681238087371	1.98537722815934e-07
C12orf43	70	-0.415284611623632	0.057233330102212	-7.25599245897421	69	4.56152965741352e-10	-0.529461981102359	-0.301107242144905	1.15506679064779e-08
C12orf45	70	-0.107633306396867	0.0479510829260389	-2.24464808360812	69	0.0279998409199605	-0.203293099429595	-0.0119735133641389	0.0710388277806889
C12orf49	70	-0.102378344947488	0.0541362813665221	-1.89112259584935	69	0.0628065813739551	-0.210377271250587	0.0056205813556105	0.136921433713717
C12orf57	70	0.110946526210487	0.0482048308909721	2.30156447310066	69	0.0243843538457935	0.0147805198385222	0.207112532582451	0.0633513395417417
C12orf65	70	-0.0612968682922218	0.0474000439205527	-1.29318167710903	69	0.200261168748261	-0.15585736858741	0.0332636320029665	0.33515868757914
C12orf66	68	-0.213455099432267	0.060196976671811	-3.5459438535594	67	0.000719195428320848	-0.333608767756268	-0.0933014311082662	0.00303879333714652
C12orf73	67	-0.151967713283975	0.0615773316167088	-2.46791650911257	66	0.0161900207505041	-0.274910822603923	-0.029024603964027	0.0448516348554617
C12orf75	69	-0.0773449579571061	0.0806837890622416	-0.958618315476485	68	0.341147124189203	-0.238346952300848	0.0836570363866361	0.493821816024856
C12orf76	67	0.269342710157404	0.0646204199320646	4.16807427807748	66	9.13305538525568e-05	0.140323878983287	0.398361541331521	0.000496030669799658
C14orf119	70	-0.115629586968929	0.0423923450485814	-2.72760534564479	69	0.00808365992983859	-0.20020000135924	-0.0310591725786175	0.0248664186054194
C14orf132	62	0.664438135456158	0.114845101707638	5.78551566916298	61	2.67181763804652e-07	0.434791161460422	0.894085109451894	2.83706361163944e-06
C14orf28	62	0.424154164399429	0.08915879938423	4.75728887478101	61	1.24333372449655e-05	0.245870126340891	0.602438202457968	8.53858472965402e-05
C14orf93	66	0.166731250716645	0.0626778120732178	2.66013195422131	65	0.00982723371797853	0.0415550162101513	0.291907485223138	0.0292758122928015
C15orf38-AP3S2	56	-0.187892900044539	0.075431294247605	-2.49091443967242	55	0.0157889312311485	-0.3390605917782	-0.0367252083108772	0.0439325229013218
C15orf39	70	0.0516280716027196	0.0713609955597221	0.723477457086651	69	0.471832185753959	-0.0907332193066361	0.193989362512075	0.61670977222287
C15orf40	70	-0.0245339926013227	0.0452604646106959	-0.542062323317929	69	0.589521909608704	-0.114826148962054	0.0657581637594085	0.714665880629295
C15orf41	68	-0.29553298528002	0.0564442719031458	-5.23583661043821	67	1.78385475960285e-06	-0.408196223535574	-0.182869747024465	1.53204507140473e-05
C15orf61	69	-0.164547628623697	0.0604247279525848	-2.72318360709571	68	0.0082083746153566	-0.28512329594318	-0.0439719613042132	0.0251906704092197
C16orf45	65	0.215400616372462	0.0681960431292362	3.15855006373703	64	0.00242015755075056	0.0791633587060586	0.351637874038866	0.00877188476973022
C16orf46	57	0.162539208642578	0.0859141083676496	1.89188029452658	56	0.0636818253674249	-0.00956743156300671	0.334645848848162	0.138462090795944
C16orf58	70	0.159657361784769	0.0511003761457872	3.12438721251822	69	0.0026054902217627	0.0577149006824751	0.261599822887062	0.00937013360881003
C16orf70	70	-0.174228279349983	0.0476972855161871	-3.65279234372479	69	0.000501134216332593	-0.269381760403562	-0.079074798296405	0.00221790885608332
C16orf72	70	0.155522546683103	0.040956339284403	3.79727654864724	69	0.000311271927075436	0.0738168854081069	0.2372282079581	0.00146191697785037
C16orf74	43	-0.285476921038869	0.224573644937065	-1.27119511783705	42	0.210654537867298	-0.738684884821606	0.167731042743868	0.347763173767434
C16orf87	70	-0.0340952604789938	0.0524472853430523	-0.650086277220646	69	0.517795116855372	-0.138724731908937	0.0705342109509495	0.656252501547587
C16orf91	69	-0.3701271236644	0.0603634379931078	-6.13164418677843	68	4.9990334899867e-08	-0.490580488773938	-0.249673758554861	6.75737726233303e-07
C16orf95	64	-0.0374834270819522	0.0759500141653006	-0.493527585134768	63	0.623356003636207	-0.189257419593497	0.114290565429593	0.740258197583294
C17orf113	57	0.218358177608605	0.0676010207009205	3.23010178462633	56	0.00207293043597719	0.0829370603048429	0.353779294912367	0.00766490130535856
C17orf49	59	0.0732631689774895	0.0682891420247078	1.07283774265288	58	0.287787477444645	-0.0634324005906452	0.209958738545624	0.437136763452866
C17orf53	67	-0.258750942356137	0.0876259802579937	-2.95290211412537	66	0.00435711904018839	-0.433701856715065	-0.0838000279972093	0.0146128839657482
C17orf58	70	0.252212455241122	0.062589258638226	4.02964439471862	69	0.000141721763812832	0.127350300685832	0.377074609796412	0.000732619940549114
C17orf75	70	-0.140615413380053	0.0499479636545355	-2.81523816171202	69	0.00634781452974746	-0.240258874466612	-0.0409719522934947	0.0201903099941007
C17orf80	70	-0.177446386796252	0.0448715985059928	-3.95453678282831	69	0.000183261754090772	-0.266962776504316	-0.0879299970881893	0.000919916775116885
C18orf21	69	0.036374332008859	0.0537678175830888	0.676507502887742	68	0.501013199580491	-0.070917677488982	0.1436663415067	0.642069048862524
C18orf25	70	0.0704991972609581	0.0447713632363984	1.57464933307287	69	0.119911761560718	-0.0188172285555956	0.159815623077512	0.227710187050753
C18orf32	65	0.138592850649533	0.0596325198867401	2.32411527993052	64	0.0233059386433589	0.0194631973101028	0.257722503988963	0.0609637182767673
C18orf54	68	-0.183222744519423	0.121079892274058	-1.51323841703384	67	0.134922250091561	-0.424899221002926	0.0584537319640794	0.249237620880331
C19orf12	70	-0.0652815351191345	0.047512024069059	-1.37400029567773	69	0.173888696526549	-0.160065429698168	0.0295023594598994	0.302525416968777
C19orf24	68	-0.128020461338593	0.0549940726263104	-2.32789562992549	67	0.0229458836890397	-0.237789089722583	-0.0182518329546037	0.0601637815591345
C19orf25	70	-0.19574578332246	0.0599551298082432	-3.26487131207156	69	0.00170629811568458	-0.315352994645574	-0.0761385719993455	0.0064732520612477
C19orf33	48	0.222007965366393	0.0841017171501474	2.63975544007074	47	0.0112223457375723	0.0528171337011995	0.391198797031586	0.0327846473111808
C19orf44	64	-0.0739058982983765	0.0613402034391848	-1.20485251359901	63	0.23276682797191	-0.19648451371737	0.0486727171206166	0.374255855180698
C19orf47	70	-0.381626449952158	0.053411427149995	-7.14503375617428	69	7.25797661013742e-10	-0.488179331659375	-0.275073568244941	1.70909168966102e-08
C19orf48	69	-0.361650907600566	0.0649339087812021	-5.56952314112441	68	4.72302654463621e-07	-0.491224505169755	-0.232077310031378	4.70225201136088e-06
C19orf53	70	-0.143996311988918	0.0416916966921221	-3.45383669684345	69	0.000948884258699303	-0.227168971152909	-0.0608236528249273	0.00387627083360367
C19orf54	66	0.300669653103876	0.0558452071037511	5.38398313297114	65	1.07317911473686e-06	0.189139072994972	0.41220023321278	9.80447245596913e-06
C19orf66	68	0.372076141745313	0.0654060526992706	5.68871115730032	67	3.05765075449914e-07	0.24152511415375	0.502627169336876	3.20836371978713e-06
C19orf70	70	-0.238292016245277	0.0617096986840836	-3.86150023945488	69	0.000251069455717496	-0.361399496702739	-0.115184535787815	0.00120912346216359
C19orf81	NA	NA	NA	NA	NA	NA	NA	NA	NA
C1D	70	-0.117981755198604	0.0491907974407532	-2.39845177018535	69	0.0191727006105672	-0.216114711018503	-0.0198487993787042	0.0517445972677457
C1GALT1	69	0.236935384994076	0.0657778560392981	3.60205393213975	68	0.000595775164794202	0.105677716891592	0.36819305309656	0.00257963784998341
C1GALT1C1	70	-0.204196782952619	0.0466541572106646	-4.37681859797785	69	4.18415805800491e-05	-0.297269279975727	-0.111124285929512	0.000249162400114537
C1orf109	69	-0.441413093608298	0.0614430634763022	-7.18409969546107	68	6.60420524155521e-10	-0.564020817827131	-0.318805369389465	1.5752094695503e-08
C1orf112	70	-0.43672894928659	0.0750682506098241	-5.81775844966121	69	1.69965694652328e-07	-0.586486011660779	-0.2869718869124	1.93144417970181e-06
C1orf115	62	-0.0793183525059355	0.110243609737198	-0.719482541391895	61	0.474591204229654	-0.299764074631414	0.141127369619543	0.61900288658918
C1orf116	28	0.875928007755546	0.227192386197283	3.8554461371559	27	0.000647929910963404	0.409767736643987	1.34208827886711	0.00277727174589183
C1orf122	70	-0.264585883258058	0.0567893287463458	-4.65907749041819	69	1.49784423564109e-05	-0.377877494267598	-0.151294272248518	0.000100743422786509
C1orf123	70	-0.033295868509747	0.0460456016720159	-0.723106383687075	69	0.472058657422243	-0.125154330451189	0.0585625934316954	0.616787720971915
C1orf131	69	-0.41868793539786	0.0642881372043622	-6.51267797769463	68	1.05863938122406e-08	-0.546972915848664	-0.290402954947056	1.73688896111776e-07
C1orf159	68	-0.240345454054042	0.0585812450093912	-4.10277135652396	67	0.000112930014237534	-0.35727410848199	-0.123416799626095	0.000598855743680848
C1orf174	70	-0.107898965123077	0.0463526453790741	-2.32778440670807	69	0.022862567846054	-0.200369962500153	-0.015427967746002	0.0600020681449563
C1orf198	70	-0.0455520109546221	0.0671831996275833	-0.678026816334003	69	0.500022175098216	-0.179578827023904	0.0884748051146595	0.641460406455881
C1orf21	67	0.808622869459927	0.134531434320954	6.01066117774958	66	8.87863196311144e-08	0.54002219446409	1.07722354445576	1.09902798105881e-06
C1orf210	39	0.260099656260175	0.102863840592688	2.52858200473086	38	0.0157262624492311	0.0518626976867659	0.468336614833583	0.0438021036726324
C1orf216	70	-0.391222607278446	0.0616443265413405	-6.34644953118403	69	1.98949554492841e-08	-0.514199673879466	-0.268245540677425	3.04982654993794e-07
C1orf226	61	-0.0895865464860203	0.0758041721571733	-1.18181551142423	60	0.24194174126396	-0.241217466951608	0.0620443739795675	0.38503456919292
C1orf35	70	-0.132259477622336	0.0512309273250518	-2.58163348836478	69	0.0119606025135032	-0.23446238120114	-0.0300565740435318	0.0346312602734015
C1orf43	70	0.0824107995784	0.0383593375830781	2.14838953879002	69	0.0351952351245231	0.0058860149404876	0.158935584216312	0.0858290133610568
C1orf50	69	0.0423363859085955	0.0542984550246038	0.779697799677947	68	0.438274154021183	-0.0660144941176421	0.150687265934833	0.587846008253591
C1orf52	70	0.0383420215102789	0.0482078817678416	0.795347567746816	69	0.429138896071275	-0.0578300711945085	0.134514114215066	0.579941973137425
C1orf61	20	0.71450393681315	0.45707789848375	1.56319948784081	19	0.13450856960667	-0.242171099451739	1.67117897307804	0.248721998250679
C1orf74	68	-0.226391185179463	0.0613064212104522	-3.69278096338895	67	0.000447748026540709	-0.348759314070919	-0.104023056288006	0.00200929531149626
C1QBP	70	-0.575710722408796	0.0641248027305759	-8.9779726080044	69	3.27263572847299e-13	-0.703636203610815	-0.447785241206778	2.5032277837582e-11
C1QL1	43	0.859079190083772	0.226227925307599	3.79740559842775	42	0.000464356175570648	0.402532753353929	1.31562562681362	0.002078359299134
C1QL4	34	0.442866473318295	0.134446776625025	3.29399100845281	33	0.00236343585312542	0.169332449581928	0.716400497054662	0.00859243293858372
C1QTNF1	54	0.655222731563747	0.14199436266899	4.614427779018	53	2.53769861329645e-05	0.370418107282706	0.940027355844787	0.000160328198918091
C1QTNF3	55	0.240201109084437	0.0815691602878297	2.94475397609647	54	0.00475930113758087	0.0766647890684751	0.403737429100398	0.0157427405060869
C1QTNF6	63	0.137510590912808	0.114601350513869	1.19990375590003	62	0.234741815187069	-0.0915742445779752	0.366595426403591	0.376830434540423
C1R	61	0.36372233214883	0.0845268216302175	4.30304044484269	60	6.31191159249802e-05	0.194643514940118	0.532801149357542	0.000357977407590052
C1RL	66	0.410984879578874	0.0921628517490742	4.45933336240328	65	3.3296857317133e-05	0.226922954605286	0.595046804552463	0.000203693019583189
C1RL-AS1	56	0.26108368899846	0.0812936720499845	3.21161146267239	55	0.00220675164202609	0.0981675296122701	0.42399984838465	0.00809729511517633
C20orf194	68	0.281978954814232	0.0503933683224517	5.59555680044913	67	4.41166414042449e-07	0.181393370655145	0.382564538973319	4.43405228649279e-06
C20orf27	70	-0.532772282229395	0.0555965528646938	-9.58282941616923	69	2.62253342605681e-14	-0.643684370462583	-0.421860193996207	3.16157806830392e-12
C20orf96	67	0.178534895945645	0.061199502900984	2.91726055740192	66	0.00482216895778896	0.0563461459959716	0.300723645895319	0.015922201819243
C21orf58	69	-0.294666757720532	0.0919632547339622	-3.20417930588651	68	0.00206300004302804	-0.478176575375322	-0.111156940065741	0.00763199915851367
C21orf59-TCP10L	61	-0.0484187417071421	0.0794400886063774	-0.609500096947967	60	0.544494265874433	-0.207322577927099	0.110485094512814	0.678271006100223
C21orf62	64	0.157298457541711	0.0681211930013879	2.30909722233588	63	0.0242300604959233	0.0211691157621578	0.293427799321265	0.0630316878058603
C21orf91	69	-0.171283110934237	0.0758534114635855	-2.25808052175035	68	0.0271537869913564	-0.322646236852786	-0.019919985015688	0.0693602737631867
C22orf34	28	0.539131246594418	0.141413450367233	3.81244673115861	27	0.000725360013860516	0.248974813690159	0.829287679498678	0.00306299939605063
C22orf39	70	0.0069451513095432	0.0494434706861046	0.140466500696017	69	0.888700672166113	-0.0916918738426904	0.105582176461777	0.929427548797205
C2CD2	67	-0.0683344660018776	0.0461644986473512	-1.48023845171334	66	0.14356761419856	-0.160504861419951	0.0238359294161959	0.261505733137828
C2CD2L	70	-0.260987687837682	0.0599620557136963	-4.35254736902004	69	4.56407920185625e-05	-0.380608715964125	-0.141366659711239	0.000268898817677491
C2CD3	69	-0.134396966289332	0.0458487221000839	-2.93131324349574	68	0.00459372857680026	-0.22588666678581	-0.0429072657928533	0.015279365315727
C2CD4C	40	0.0300917270374211	0.143331604310634	0.209944814210026	39	0.834803693079721	-0.259823807556	0.320007261630843	0.894959911067342
C2CD5	NA	NA	NA	NA	NA	NA	NA	NA	NA
C2orf27A	66	0.0991734954221566	0.0672422486475624	1.47486881264123	65	0.145075272837882	-0.0351185483974112	0.233465539241724	0.263703771410479
C2orf42	65	-0.0509716637178196	0.0590903940851876	-0.862604904010901	64	0.391575627758769	-0.169018296267118	0.0670749688314786	0.545153491178373
C2orf49	70	0.0858656743508575	0.045325642901585	1.89441713021692	69	0.0623611859945584	-0.0045565091424475	0.176287857844162	0.136191378136388
C2orf68	70	0.078921072359652	0.0474556591350864	1.66304870268469	69	0.100838895238138	-0.0157503772527804	0.173592521972084	0.1989866003178
C2orf69	69	-0.204521549855647	0.0619554306859985	-3.30110770905943	68	0.00153647036038428	-0.328151686922912	-0.0808914127883814	0.00591187953756184
C2orf70	11	0.589681975584096	0.391202790234927	1.50735626202967	10	0.162641560087667	-0.281972160343782	1.46133611151197	0.28797214925484
C2orf72	50	1.76168898588803	0.275148573638798	6.40268260376553	49	5.5878025353027e-08	1.20875722577207	2.31462074600399	7.39550333162796e-07
C2orf76	67	-0.0944075513833339	0.0656494029742219	-1.43805651089324	66	0.155142955669559	-0.225480813487128	0.0366657107204597	0.277844424565005
C2orf81	49	0.919380376984486	0.126963318835017	7.24130705955455	48	3.14011760799244e-09	0.664103515191473	1.1746572387775	6.06878406971987e-08
C3orf18	58	0.405484049287368	0.0749395544172963	5.41081478853551	57	1.29682440954513e-06	0.255420180032073	0.555547918542663	1.15156761619416e-05
C3orf33	67	-0.206379730007417	0.0655478421920761	-3.14853583437055	66	0.00246425269397238	-0.337250219467218	-0.075509240547617	0.0089131301670238
C3orf38	70	-0.0794744597170243	0.0481801439706974	-1.64952723606139	69	0.103585329148937	-0.175591217030574	0.0166422975965252	0.203266964895765
C3orf52	59	-0.25751052548115	0.0897312609997156	-2.86979724359346	58	0.00572239264426315	-0.43712715949868	-0.0778938914636192	0.0184229482779456
C3orf62	67	-0.0312855052588469	0.0620507508367761	-0.504192211003911	66	0.615805372394794	-0.155173826548829	0.0926028160311356	0.734578073582208
C3orf67	63	0.349021851015328	0.0973032330135849	3.58695019893737	62	0.00065993896223767	0.15451545970591	0.543528242324746	0.00282027476155245
C3orf80	27	-0.166896813629	0.211995457382171	-0.787265989988312	26	0.438244303755113	-0.602659717136613	0.268866089878613	0.587841515746261
C4orf3	70	1.32866955617617	0.106399326205749	12.4875749081988	69	2.24829969818741e-19	1.11640870819151	1.54093040416083	1.51126617894525e-16
C4orf33	68	-0.042055144274118	0.0716453537138937	-0.58699053175255	67	0.55918290908516	-0.185059868814147	0.100949580265911	0.690519138747816
C4orf46	69	-0.308185510961218	0.0760248220934472	-4.05374853205715	68	0.000132023933538922	-0.459890681466173	-0.156480340456262	0.00068862461983771
C4orf47	49	3.0714401532541	0.239496356754808	12.8245798594698	48	4.04405351818947e-17	2.58990045403851	3.55297985246969	1.41080229101073e-14
C4orf48	64	-0.100773419722321	0.0795850599623216	-1.2662353935529	63	0.210090892238282	-0.259811471623973	0.0582646321793304	0.34707947952853
C5AR2	66	-0.0107317175974809	0.0739307088197629	-0.145159133042318	65	0.885034418505397	-0.15838153877572	0.136918103580759	0.927417427715171
C5orf15	70	0.153445173450609	0.0419036095097144	3.66186052337654	69	0.000486526337973329	0.06984975978276	0.237040587118458	0.00216318445157835
C5orf22	70	-0.271637956146826	0.051822597536481	-5.2416893220299	69	1.64964416906145e-06	-0.375021209501176	-0.168254702792475	1.43274890204076e-05
C5orf24	70	0.0173524847974507	0.0402727392123279	0.430874212602329	69	0.667902889738955	-0.0629894316479922	0.0976944012428937	0.773328212766964
C5orf30	70	-0.102223311928356	0.0568451717942387	-1.79827606640669	69	0.0765074406110471	-0.215626326770256	0.0111797029135439	0.160268962851473
C5orf34	67	-0.415633676590755	0.0950773321260522	-4.37153280699667	66	4.4728364868761e-05	-0.605461694962543	-0.225805658218968	0.000264224923973064
C5orf51	70	-0.0358860419364309	0.0454921021457855	-0.788841144808594	69	0.432906954282648	-0.126640302535756	0.054868218662894	0.583097942205167
C5orf63	53	-0.120739519326766	0.0940062023751244	-1.28437822480015	52	0.204702372725456	-0.309376764978792	0.06789772632526	0.340561616425115
C6orf106	70	-0.0752384851876888	0.0384358535339606	-1.95750785451429	69	0.0543336867741614	-0.151915914970997	0.00143894459561919	0.121937458521292
C6orf120	69	-0.159058299094238	0.0556804028166516	-2.85662982033367	68	0.00567494442557398	-0.270166813004365	-0.0479497851841107	0.0182940876686647
C6orf132	49	0.405228830879264	0.114445616626182	3.54079817842983	48	0.000898620772027429	0.175120496232925	0.635337165525604	0.00369475550789851
C6orf136	68	-0.166018404999119	0.0580022728252378	-2.86227413017653	67	0.0056076915502374	-0.281791426110748	-0.05024538388749	0.0181009624515958
C6orf141	59	-0.069893781865216	0.128838678564244	-0.542490676279052	58	0.589559026417254	-0.327792417381431	0.188004853650999	0.714665880629295
C6orf203	70	-0.204931753527195	0.0548223425084389	-3.73810647539641	69	0.000378770417780936	-0.314299334359844	-0.0955641726945463	0.0017355681485678
C6orf226	60	0.0115561059112884	0.112818889245122	0.102430594633673	59	0.918762248805971	-0.214193970029253	0.23730618185183	0.94980585370807
C6orf47	70	-0.154389130702828	0.0490235096244245	-3.14928759457703	69	0.00241915833139182	-0.252188356460539	-0.0565899049451167	0.00876969604623848
C6orf62	70	0.0481368797688723	0.0378621724537038	1.2713713093915	69	0.207865631080496	-0.0273960875736436	0.123669847111388	0.34440360237732
C6orf89	70	0.062117375721791	0.0378533076075899	1.64100258729665	69	0.105347836781871	-0.0133979067366144	0.137632658180196	0.20601478581464
C7orf25	68	-0.256091695480919	0.052709588135595	-4.8585410081772	67	7.44449005410702e-06	-0.361300473736799	-0.150882917225039	5.42132890283001e-05
C7orf26	69	-0.323368372485333	0.0502678783128005	-6.43290274702103	68	1.46755970152951e-08	-0.423676361907423	-0.223060383063244	2.32857005002344e-07
C7orf43	67	-0.552553247997978	0.0785046780898421	-7.03847543156125	66	1.38368496904095e-09	-0.709292894993462	-0.395813601002494	2.96836556898128e-08
C7orf50	70	-0.275058412661851	0.0600411832573454	-4.58116242451302	69	1.9948233404179e-05	-0.394837295918706	-0.155279529404996	0.000129383541921491
C8orf33	70	-0.352129873657247	0.0458014202848105	-7.68818677385048	69	7.42879025591652e-11	-0.44350120705983	-0.260758540254665	2.51197294903567e-09
C8orf37	63	0.109489392990727	0.0637033636725517	1.71873801756412	62	0.09065206218836	-0.0178518165299222	0.236830602511377	0.183203721160915
C8orf58	68	1.35493338825399	0.115436322858891	11.7374960904659	67	6.55384607356085e-18	1.12452152346968	1.5853452530383	2.96688599191279e-15
C8orf59	70	-0.0320277265975465	0.0460065004073555	-0.696156549921496	69	0.488669210609468	-0.12380818365033	0.0597527304552366	0.631829122740686
C8orf76	70	-0.178485051393603	0.0492757401604053	-3.62216885657298	69	0.00055361475493849	-0.276787463302619	-0.0801826394845864	0.00242023699133732
C8orf82	69	0.114702376082943	0.0607486376289687	1.88814729942595	68	0.0632731486786931	-0.00651964293235417	0.23592439509824	0.137749041514454
C9orf116	59	-0.0501527504773368	0.0762337701711492	-0.657881019982889	58	0.513217332981416	-0.202751221111236	0.102445720156562	0.652307145406168
C9orf16	64	-0.0400118987610556	0.0690467558699342	-0.579489916027733	63	0.564325190052874	-0.177990830345477	0.0979670328233659	0.694502980716038
C9orf3	67	-0.010780098622934	0.0636773016928025	-0.169292641747608	66	0.866084269756775	-0.137915933477675	0.116355736231807	0.915660896608588
C9orf40	68	-0.27746049638345	0.0598544478837457	-4.63558693118943	67	1.69651524614862e-05	-0.396930474384978	-0.157990518381922	0.000112200659481421
C9orf72	68	0.0580155760588148	0.0682148881967134	0.850482608598779	67	0.398086022993086	-0.0781419106507267	0.194173062768356	0.551524985573088
C9orf78	70	-0.260840008028108	0.0452565894300319	-5.76358075836392	69	2.11143583352043e-07	-0.35112443361494	-0.170555582441275	2.32254248289247e-06
C9orf85	69	0.133409937782307	0.0539973609113842	2.47067515024018	68	0.0159979112715125	0.0256598817044359	0.241159993860179	0.0444192849949543
CA11	61	0.555352317088009	0.111940236831891	4.96115009942336	60	6.09422886224074e-06	0.331438505157418	0.7792661290186	4.54241211768226e-05
CA12	60	0.806384159963937	0.163590119151871	4.92929624444688	59	7.04288203289573e-06	0.479041087640134	1.13372723228774	5.15764969474061e-05
CA13	60	-0.00340310155642331	0.0698980799677355	-0.0486866242677076	59	0.961333476203125	-0.143268836509106	0.13646263339626	0.977811088005779
CA2	33	-0.0719702299451683	0.195573807477034	-0.367995238593592	32	0.715299866342961	-0.470341039502585	0.326400579612248	0.81077065075215
CA5B	64	0.468946552722051	0.0758068943551248	6.18606733215089	63	5.10975269107241e-08	0.317458562329618	0.620434543114484	6.88187821453359e-07
CA5BP1	68	-0.0452247162488749	0.0679358005991262	-0.665697847821589	67	0.507889686464576	-0.180825141782128	0.0903757092843777	0.647766180728961
CA9	48	4.75706557828357	0.457494546957945	10.3980814851567	47	8.94926818873275e-14	3.83670526335783	5.67742589320932	8.54224341010936e-12
CAAP1	69	-0.0408490204208478	0.0491540945638377	-0.831040034066665	68	0.40885957573127	-0.138934488975551	0.057236448133855	0.561533140765881
CAB39	70	-0.0216147272653973	0.0538928598348644	-0.401068477932476	69	0.689609039480644	-0.129128040899977	0.0858985863691825	0.791110245850209
CAB39L	67	-0.0405077219387582	0.0746474358938797	-0.542653896328667	66	0.589195950043931	-0.189546136410502	0.108530692532986	0.714495110642603
CABIN1	70	0.34364356024519	0.066955105443681	5.13244745069134	69	2.51450032909682e-06	0.210071779622297	0.477215340868083	2.08744933757581e-05
CABLES1	68	-0.0862917953614104	0.0805485275647386	-1.07130195883538	67	0.287877619852907	-0.247067329285066	0.0744837385622448	0.437227070426373
CABLES2	69	-0.107403271245755	0.0533483372929022	-2.01324496124538	68	0.0480494792435632	-0.213858220857181	-0.000948321634328078	0.110254841065555
CACFD1	68	0.15847715024783	0.0787309356041219	2.01289555410203	67	0.0481467067371221	0.00132954506177535	0.315624755433886	0.110409412678884
CACHD1	66	-0.151709293030823	0.0675450132815392	-2.2460472751478	65	0.0281061805485964	-0.286605999578227	-0.0168125864834201	0.0712271560526636
CACNA1A	32	0.624928606160639	0.180433828985075	3.46347804996331	31	0.00158016175210735	0.25693138576079	0.992925826560489	0.00605373885755531
CACNA1B	26	1.37328903510675	0.533128623439184	2.57590565340075	25	0.0162951525119724	0.275290081557459	2.47128798865605	0.0450921997281152
CACNA1G	35	0.663415327665562	0.32927992943687	2.01474571742081	34	0.0518947639362461	-0.00576200096104318	1.33259265629217	0.11745022483765
CACNA1H	44	0.989855356501576	0.243482516046744	4.0654063074966	43	0.000200328073490413	0.498826065741743	1.48088464726141	0.000994333704668684
CACNA2D2	37	0.144561816983651	0.145534477791346	0.993316629691762	36	0.327185641206679	-0.150595784360801	0.439719418328103	0.478798779076828
CACNB1	60	0.214197514319526	0.0733801276619917	2.9190125602694	59	0.00496415632098447	0.0673642180243536	0.361030810614698	0.0163326780646808
CACNB3	68	0.530023191169997	0.064227365670809	8.25229535158857	67	8.44412411727385e-12	0.401824832734024	0.658221549605969	3.97680596962566e-10
CACNB4	38	0.700982510657126	0.1762131871372	3.97803661601864	37	0.000311030757883819	0.343940678993393	1.05802434232086	0.00146109366187609
CACTIN	68	-0.230651238143519	0.0471821457116088	-4.88852795193604	67	6.65562454959889e-06	-0.324827195144729	-0.136475281142309	4.91625253943398e-05
CACUL1	NA	NA	NA	NA	NA	NA	NA	NA	NA
CACYBP	70	-0.450056213677369	0.0699997703901461	-6.42939557042782	69	1.41528425707115e-08	-0.58970193467575	-0.310410492678988	2.25854930865844e-07
CAD	70	-0.626015835038233	0.0707168243712809	-8.85243137830248	69	5.53959603886798e-13	-0.767092039588664	-0.484939630487803	3.85760246435593e-11
CADM4	60	0.131047331395557	0.0961910100957883	1.36236568536974	59	0.17826085493174	-0.0614304352197576	0.323525098010871	0.308174131719731
CADPS2	60	-0.228699368277971	0.0789900552660072	-2.89529317972753	59	0.00530383574372767	-0.386758103780188	-0.0706406327757539	0.0172875387082497
CALB2	32	0.611619810529877	0.250623291799397	2.44039492953204	31	0.0205835834215518	0.100470236924876	1.12276938413488	0.0549506616267736
CALCOCO1	66	0.682808190944953	0.0937353293615316	7.2844272868707	65	5.44323727701357e-10	0.495605811321428	0.870010570568477	1.34157654754128e-08
CALCOCO2	70	0.144204866823611	0.0405301372989614	3.55796640312162	69	0.000681104994184496	0.0633494552453813	0.225060278401841	0.002898191248993
CALD1	66	0.186581598276049	0.0449535006919329	4.15054657377399	65	9.84340117811008e-05	0.0968032579292635	0.276359938622834	0.000529324424079607
CALHM2	55	0.170523117817747	0.0798943018240886	2.13435894581324	54	0.0373700149710788	0.0103446868463863	0.330701548789107	0.0900450450282426
CALM1	70	-0.0809932217430562	0.0531255669536997	-1.52456202140193	69	0.131939010584132	-0.186975827962312	0.0249893844761996	0.245176437360913
CALM2	70	-0.228097400466149	0.0410057597539165	-5.562569791049	69	4.69644627983556e-07	-0.309901652880213	-0.146293148052084	4.67788825232655e-06
CALM3	70	-0.0187137705157853	0.0355135816736151	-0.52694686466076	69	0.599920582084655	-0.0895614274496003	0.0521338864180296	0.72228823012385
CALML4	69	-0.227473952295203	0.0740544374330314	-3.07171265058777	68	0.00305946428508241	-0.375247281427333	-0.0797006231630739	0.010751748537975
CALR	70	0.0541398706552542	0.0669377643457556	0.808809065919858	69	0.421405083737453	-0.0793973154238397	0.187677056734348	0.573384520941301
CALU	70	0.128546672356732	0.0443900514483159	2.89584418496115	69	0.00506078502952395	0.0399909427435396	0.217102401969924	0.0166096890890451
CAMK1	61	-0.117552135565764	0.0527605721225494	-2.22802996322177	60	0.0296388871455558	-0.223088993070725	-0.0120152780608016	0.0743907327003136
CAMK1D	69	0.543064807787997	0.0878899985483342	6.17891474294819	68	4.12807509440924e-08	0.367683046301382	0.718446569274612	5.74100073631259e-07
CAMK2D	67	0.0511959854467479	0.0678468969358263	0.754581090055926	66	0.453184479287483	-0.0842647149116476	0.186656685805143	0.601012682025287
CAMK2G	64	-0.0627980486885864	0.0491883306317199	-1.2766859107044	63	0.206399081070315	-0.161093084008867	0.0354969866316942	0.342587879100698
CAMK2N1	67	0.32908297536599	0.0902134350846058	3.64782667966654	66	0.000522963109781064	0.148966040764602	0.509199909967378	0.00230074726322165
CAMK2N2	50	0.0649683816522337	0.0837638437382159	0.775613662802737	49	0.441704553167229	-0.103361364490848	0.233298127795315	0.591053290604782
CAMK4	62	-0.0469903300430358	0.11856634557521	-0.396320978057206	61	0.693251248605979	-0.284078391041886	0.190097730955814	0.794220596869013
CAMKK1	67	-0.0318964416650227	0.0889870125065614	-0.358439290932155	66	0.721158576159077	-0.209564744584488	0.145771861254442	0.815451393877145
CAMKK2	70	-0.215053841886855	0.0456111811633794	-4.7149369168172	69	1.21808513225331e-05	-0.306045658626364	-0.124062025147346	8.3859603983994e-05
CAMKMT	66	-0.336646889143969	0.0686531810205268	-4.90358762900315	65	6.59750936320018e-06	-0.473756759491761	-0.199537018796176	4.87804324138117e-05
CAMLG	70	0.274771015159427	0.0466080728442449	5.89535242269421	69	1.24445633068421e-07	0.181790453931817	0.367751576387038	1.46832608123602e-06
CAMSAP1	70	0.00187051762706688	0.0409046187747991	0.0457287632324614	69	0.963658528297131	-0.0797319640544281	0.0834729993085619	0.979062587582419
CAMSAP2	69	0.0247078901816427	0.0396679183389315	0.622868333309881	68	0.535454451200408	-0.0544482084381912	0.103863988801477	0.670663370145811
CAMSAP3	41	0.194157855462224	0.0752607046849004	2.57980384684304	40	0.0136652898599495	0.042050297366464	0.346265413557985	0.038896889474323
CAMTA1	70	0.0712165784229044	0.0494239397200711	1.44093285210089	69	0.154126419900465	-0.0273814835181879	0.169814640363997	0.276604550666028
CAMTA2	69	-0.0213591470092251	0.049290327336144	-0.433333438091467	68	0.666144082175288	-0.119716463828508	0.0769981698100574	0.771902271142644
CAND1	70	-0.0776193349311032	0.0363655331210168	-2.13442037747123	69	0.0363634276687061	-0.150166588498806	-0.00507208136340029	0.088087097580784
CANT1	70	-0.0667999902458165	0.0483256065899724	-1.38228974159794	69	0.171341005581366	-0.163206937544758	0.0296069570531251	0.299384496715704
CANX	70	0.135377483230412	0.0579307842168972	2.33688331791865	69	0.0223545229356823	0.019808730863346	0.250946235597478	0.0588078780549459
CAP1	70	-0.122925568881945	0.0351162053213318	-3.50053679653344	69	0.000818350306191948	-0.1929804816837	-0.05287065608019	0.00340447233532442
CAP2	68	-0.0698713894665869	0.0653568918035701	-1.06907454651585	67	0.288872663319001	-0.20032429149964	0.0605815125664665	0.438318176191401
CAPG	67	0.19078487861647	0.0619542252012973	3.07944902864309	66	0.00302129152453533	0.0670892769758015	0.314480480257139	0.0106378235868639
CAPN1	70	0.00370490716754384	0.0387623619154065	0.0955800158831726	69	0.924131187003475	-0.0736238890143238	0.0810337033494115	0.952871773665751
CAPN10	66	-0.114204211293194	0.0515466415327668	-2.21555096311361	65	0.0302309059802456	-0.217149963148576	-0.0112584594378113	0.075591168507399
CAPN10-DT	63	0.0646773444481256	0.0718855079566513	0.899727167360737	62	0.371746811152583	-0.0790197384446967	0.208374427340948	0.525295436678977
CAPN12	28	1.82112795214998	0.293129509830559	6.21270766359438	27	1.21022695787633e-06	1.21967587859873	2.42258002570122	1.08729260346751e-05
CAPN15	69	-0.134967695830365	0.0512012649756722	-2.63602268214454	68	0.0103829135307828	-0.237138229339226	-0.032797162321504	0.0306512893185819
CAPN2	70	-0.0613602631505368	0.0613099788120376	-1.00082016564797	69	0.320410701835191	-0.183670324281933	0.0609497979808595	0.472468934927089
CAPN5	66	0.281778822037781	0.0984108595157549	2.86328991967264	65	0.00563784681010172	0.0852387639014269	0.478318880174135	0.0181850687715103
CAPN7	70	0.0206831503221866	0.0423924940866291	0.487896519603695	69	0.627169918844835	-0.0638875613908949	0.105253862035268	0.743275265257045
CAPNS1	70	0.140458774010242	0.0359112658906684	3.91127325998108	69	0.00021225972623513	0.0688177587709561	0.212099789249528	0.00104374756092832
CAPRIN1	70	-0.174779105257407	0.034560345518083	-5.0572152169589	69	3.35474276813566e-06	-0.243725108093228	-0.105833102421585	2.69002710063725e-05
CAPRIN2	68	0.0579445472244736	0.0589406326305591	0.983100191470136	67	0.329094967312318	-0.0597014478976584	0.175590542346606	0.480799879135997
CAPS2	49	0.354883260113005	0.0979512225351609	3.62306105965767	48	0.000701228850044994	0.157939127532024	0.551827392693986	0.00297184913100842
CAPZA1	70	-0.149160505550095	0.0362736884943106	-4.11208541898048	69	0.000106571313197573	-0.221524534100848	-0.0767964769993416	0.000567442359421161
CAPZA2	70	0.0857679365873535	0.0394565593078673	2.17373075837994	69	0.0331594082449199	0.00705425450021677	0.16448161867449	0.081636181319513
CAPZB	70	0.0507668514411789	0.0425078111586235	1.19429464979356	69	0.236452220374536	-0.0340339115359614	0.135567614418319	0.378781191041234
CARD10	65	-0.0333198966501663	0.0834413557134466	-0.399321132372215	64	0.690986040061475	-0.20001316735539	0.133373374055057	0.792484997706615
CARD19	70	0.0770238921628456	0.0601712143520347	1.28007873851795	69	0.204804394136462	-0.0430143960301808	0.197062180355872	0.340687867891598
CARD8	69	-0.104727478527009	0.0493149514919609	-2.12364557519804	68	0.0373407436504863	-0.203133932084187	-0.00632102496983085	0.0900024313435931
CARF	65	0.313063142253173	0.0638307856724587	4.90457917688222	64	6.73777567619593e-06	0.185546488856905	0.44057979564944	4.96536013453084e-05
CARHSP1	70	0.422424479740653	0.0521690354916427	8.09722617563676	69	1.3273287811884e-11	0.318350101576033	0.526498857905272	5.80725976811067e-10
CARM1	57	-0.168336622485901	0.0596428609013266	-2.82241025903164	56	0.00658602362276456	-0.287815630032018	-0.0488576149397839	0.020849318681342
CARMIL1	67	-0.0113639397385332	0.0655583852213637	-0.173340751151235	66	0.862914127502319	-0.142255479035477	0.119527599558411	0.913968096276478
CARMIL2	46	0.234986065568685	0.130808947758722	1.79640666479574	45	0.0791445704981677	-0.0284766794080941	0.498448810545464	0.164534663804157
CARNMT1	70	-0.247311240360525	0.0569364863045923	-4.34363369452564	69	4.71182963437586e-05	-0.360896422666187	-0.133726058054862	0.000276429000131514
CARS	70	0.046315063095495	0.0708598233880486	0.653615277050022	69	0.515532036338213	-0.0950464166878012	0.187676542878791	0.654431248143197
CARS2	70	-0.223525999559106	0.0535428303591935	-4.17471392639456	69	8.56515063478951e-05	-0.330341023496044	-0.116710975622169	0.000468422513266521
CASC19	34	-0.101448111513147	0.159652721613706	-0.63542989112713	33	0.529530094167428	-0.426264015915653	0.223367792889358	0.665422419489117
CASC3	70	0.0237744152574221	0.0366154945498023	0.649299307567333	69	0.51830050080295	-0.0492714977165901	0.0968203282314343	0.656742928642239
CASC4	70	0.000881377585620016	0.0392851651779708	0.0224353794015418	69	0.982165413524609	-0.0774903825679034	0.0792531377391435	0.989873439921713
CASC8	33	0.426209435986234	0.128325666244107	3.32131091511715	32	0.0022485179838876	0.164818607591879	0.687600264380588	0.00822775089386253
CASD1	69	0.141614764555191	0.0531293185323056	2.66547300939088	68	0.00959555405613186	0.0355968600759355	0.247632669034447	0.0287167539224389
CASK	69	0.185489583686555	0.0444658105180484	4.17151023506625	68	8.77809798127233e-05	0.0967594402869432	0.274219727086167	0.000478299605552893
CASKIN1	45	0.935430357962668	0.160087351053591	5.84324964968358	44	5.73326555143169e-07	0.612795501570665	1.25806521435467	5.59258119885039e-06
CASKIN2	67	-0.32778045827335	0.0500708989864756	-6.54632660703546	66	1.02951835837334e-08	-0.427750233614702	-0.227810682931997	1.69790157809943e-07
CASP10	64	-0.178447319557597	0.0721910794763143	-2.47187493042191	63	0.0161544308473163	-0.322709680483453	-0.0341849586317414	0.0447754073541385
CASP2	70	-0.188378925828534	0.0435158961439206	-4.32896809031594	69	4.96505927665577e-05	-0.275190763325131	-0.101567088331937	0.000288992245801045
CASP3	70	-0.157834063117705	0.05484661932111	-2.87773549347928	69	0.00532693651513702	-0.267250074866485	-0.0484180513689243	0.0173384681006766
CASP4	65	0.0486105954370414	0.0585529786134265	0.830198507201045	64	0.409512765651089	-0.0683624262876304	0.165583617161713	0.562082307262697
CASP6	69	-0.192193867692271	0.0573120595148535	-3.35346294164251	68	0.00130754911632154	-0.30655830185042	-0.0778294335341229	0.00513346097314062
CASP7	70	-0.0676309492676508	0.046159422176702	-1.46516022251652	69	0.147419210817825	-0.159716476903062	0.0244545783677602	0.267052097538668
CASP8	68	-0.00175237826468747	0.0668579999723483	-0.026210449989713	67	0.979167392504062	-0.135201504742918	0.131696748213543	0.987986312796811
CASP8AP2	69	-0.20524738550979	0.0572437423882504	-3.58549907722173	68	0.000628420841499071	-0.319475494964318	-0.091019276055263	0.00270567373954433
CASP9	68	0.0117915212354638	0.0599250824663435	0.196771047283688	67	0.844602382577513	-0.107819443983013	0.13140248645394	0.901847022736805
CAST	70	0.270114499450197	0.042089941651361	6.41755461881148	69	1.48587394471248e-08	0.186147363330684	0.354081635569711	2.35258071674605e-07
CASTOR1	64	0.334463978397705	0.123432136382696	2.70969933924431	63	0.00866409419206457	0.0878045360142144	0.581123420781196	0.0263956788035127
CASTOR2	69	-0.109212071014762	0.0713957056967885	-1.52967282764283	68	0.130736646855319	-0.251679983570212	0.0332558415406882	0.243492888374869
CASTOR3	64	0.0274555114950315	0.106463799062031	0.257885889259265	63	0.797335529920869	-0.185295414481406	0.240206437471469	0.869927535522341
CASZ1	58	-0.0388318413831846	0.110843169135169	-0.350331388809632	57	0.727381347226291	-0.260791458974711	0.183127776208342	0.820025616972229
CAT	69	0.0497805179871505	0.0443440757383986	1.12259681046964	68	0.26555688202012	-0.0387067074417958	0.138267743416097	0.412563577319674
CATSPER1	37	0.483471383999556	0.230296091554932	2.09934689180009	36	0.0428610644438224	0.0164092622677541	0.950533505731358	0.100597199396135
CAV1	66	0.561885364246901	0.0920119273311231	6.10665791430328	65	6.34156949903706e-08	0.378124856149704	0.745645872344097	8.24069681474166e-07
CAV2	68	0.247503154728627	0.0474821342383107	5.21255328343961	67	1.95052806741897e-06	0.152728418122008	0.342277891335245	1.66026913244388e-05
CAVIN1	69	0.277232306672063	0.0956913384397098	2.89715152063353	68	0.00506218829856941	0.0862832138086837	0.468181399535442	0.016610866987998
CAVIN3	55	0.233488789264146	0.108414401759163	2.15366948925134	54	0.0357480449973751	0.0161310006359014	0.450846577892391	0.0869191202599775
CBARP	63	0.0858719267125176	0.0639054963700907	1.34373303690835	62	0.183931913130873	-0.0418733403131737	0.213617193738209	0.315165510920963
CBFA2T2	69	0.248085221661093	0.0466807197101484	5.31451149856969	68	1.27952093647788e-06	0.154935295782707	0.341235147539479	1.13939515909082e-05
CBFA2T3	26	0.378992070775604	0.18291260941222	2.07198438638799	25	0.0487327511899479	0.00227649990643125	0.755707641644777	0.111557263869497
CBFB	68	-0.291928859514172	0.0595867095906955	-4.89922772241407	67	6.39442891179811e-06	-0.41086442964608	-0.172993289382264	4.74385358265906e-05
CBL	69	0.146125021150845	0.045363679396422	3.22118979534033	68	0.00195977332039391	0.0556032082999404	0.236646834001749	0.00730003220704914
CBLB	68	0.461043447949216	0.0598100490998804	7.70846128514778	67	8.07273780913501e-11	0.341662090291192	0.58042480560724	2.70497688945971e-09
CBLC	11	0.16635015840272	0.181821765295315	0.914907839182699	10	0.381771701971252	-0.2387739809885	0.57147429779394	0.535334717309963
CBLL1	70	-0.0541121244214452	0.0445261199240867	-1.2152894641101	69	0.228397751148888	-0.142939303216517	0.0347150543736267	0.369372916009378
CBR4	70	-0.0331555592487833	0.0566959794291948	-0.584795598957592	69	0.560592613013991	-0.14626094346607	0.0799498249685032	0.691759309183152
CBWD1	68	-0.0821004205030863	0.0659503793567726	-1.24488170202853	67	0.217511992321923	-0.213737928650342	0.0495370876441693	0.3560775655856
CBWD2	70	0.00551196327230761	0.0476226344108877	0.115742510688309	69	0.908192804461367	-0.089492592901021	0.100516519445636	0.942922199324224
CBWD3	68	-0.038226766934187	0.0761554131331897	-0.501957318087572	67	0.617343175627652	-0.190233607752281	0.113780073883907	0.735756840843143
CBWD5	70	-0.218646406759527	0.0625341175195354	-3.49643387373657	69	0.000829098760281288	-0.343398557792901	-0.0938942557261526	0.00344273094357161
CBWD6	62	-0.0791682723162021	0.0668926520850026	-1.18351223712285	61	0.241197979432757	-0.212928397088234	0.0545918524558299	0.384287790939795
CBX1	70	-0.0147229116553186	0.0374577129599693	-0.393054206781201	69	0.695491217413124	-0.0894490043852123	0.0600031810745751	0.796046758754278
CBX2	70	-0.0263122390845057	0.114124237164719	-0.230557852899629	69	0.818340540558875	-0.253983862768873	0.201359384599862	0.883673930030034
CBX3	70	-0.142495398626492	0.0357411675159295	-3.9868702823707	69	0.000164115463203401	-0.213797076892976	-0.0711937203600091	0.000833808796330244
CBX4	68	0.103169012796283	0.0569435955020067	1.81177552781414	67	0.0745026140195502	-0.0104908795339595	0.216828905126526	0.156779905529045
CBX5	70	-0.0289237078969222	0.070853640036748	-0.408217670707122	69	0.684377910423286	-0.170272852231891	0.112425436438047	0.78685900632402
CBX6	70	-0.506827547899693	0.0517704011219068	-9.78990961855283	69	1.11126883939749e-14	-0.610106672256104	-0.403548423543283	1.56013705034906e-12
CBX7	69	0.371680929664021	0.0806165864605071	4.61047714847244	68	1.82470855267813e-05	0.210813036024151	0.53254882330389	0.000119679731269977
CBX8	68	0.213184621578689	0.05527225542605	3.85699154006686	67	0.000260290195717428	0.102860738002473	0.323508505154905	0.00124811005650757
CBY1	70	-0.0456031390750386	0.0530110066964328	-0.860257933530382	69	0.392626136797215	-0.151357203834306	0.0601509256842292	0.546136136353911
CC2D1A	67	-0.122602574937872	0.0476874592261969	-2.57096051933337	66	0.0124035398906554	-0.217813659259136	-0.0273914906166082	0.0357318599811064
CC2D1B	NA	NA	NA	NA	NA	NA	NA	NA	NA
CC2D2A	70	-0.171770348567184	0.0492603790790498	-3.48698795621402	69	0.00085435511918396	-0.270042115957379	-0.0734985811769889	0.00353225036538671
CCAR1	70	-0.138321761451803	0.0371695447411852	-3.72137357115749	69	0.000400262838570849	-0.212472974314853	-0.0641705485887518	0.00182237895836999
CCAR2	69	-0.251368294695821	0.0426445845005658	-5.89449510740305	68	1.29879149103399e-07	-0.336464238160435	-0.166272351231207	1.5219119310151e-06
CCBE1	63	0.0274846518792455	0.0966541278449829	0.284360869960219	62	0.777081433348078	-0.165724196686578	0.220693500445069	0.855615028021794
CCDC102A	65	0.35844485340424	0.0624833742868795	5.736643667138	64	2.84303383121307e-07	0.23361996368951	0.483269743118971	2.99877206105413e-06
CCDC107	70	0.439541244611728	0.0715778534690717	6.14074358630565	69	4.60945043060022e-08	0.296747334010385	0.58233515521307	6.3076390778269e-07
CCDC112	68	0.0519646180657847	0.0530757355009623	0.979065434992278	67	0.331069741170729	-0.053974993390173	0.157904229521742	0.482748682520866
CCDC113	66	-0.155131965007047	0.077036415253556	-2.01374849149521	65	0.0481792019557601	-0.308984310236551	-0.00127961977754193	0.110459498908971
CCDC114	32	1.38773479553199	0.201197301883777	6.89738273097532	31	9.83544641942873e-08	0.977390192961351	1.79807939810263	1.19807727883453e-06
CCDC115	70	0.172515840497306	0.0523204175316915	3.29729479686988	69	0.00154502550747141	0.0681394634259616	0.27689221756865	0.00593964572040396
CCDC117	70	-0.120294402329096	0.0554077026092169	-2.1710772449368	69	0.0333676444896139	-0.230829744610978	-0.00975906004721336	0.0820577705175848
CCDC12	70	-0.187198903364607	0.0489062432557119	-3.82770973402754	69	0.000281198809712498	-0.284764189117709	-0.0896336176115057	0.00133709581930174
CCDC120	64	0.279611552319285	0.0633911881882509	4.41088990931881	63	4.10081932729402e-05	0.152934370924142	0.406288733714429	0.000244988888548441
CCDC124	69	-0.197184287277667	0.0623518576808869	-3.1624444661592	68	0.00233826243062176	-0.321605482096812	-0.0727630924585216	0.00850981743003312
CCDC125	66	-0.144056012876916	0.0566974304565392	-2.54078556500617	65	0.0134572077623053	-0.25728860055009	-0.0308234252037422	0.0383883465256502
CCDC126	63	-0.0622679814425335	0.0638779139300334	-0.974796727249683	62	0.333449180721421	-0.18995811195618	0.0654221490711131	0.485211868719665
CCDC127	70	0.122190899843748	0.0431090029733514	2.83446360193675	69	0.00601606021908409	0.0361907920122162	0.20819100767528	0.0192591081920977
CCDC130	69	0.116161974330907	0.0540672295225924	2.1484728430993	68	0.0352406288876175	0.00827249761008693	0.224051451051726	0.0859035257928789
CCDC134	66	-0.465440672019398	0.0824444631848529	-5.64550552019254	65	3.90054032839653e-07	-0.630093634782897	-0.300787709255899	3.98717905827151e-06
CCDC136	55	0.104236430080755	0.076371378986486	1.36486248466457	54	0.177956470187214	-0.0488789658596115	0.257351826021121	0.307743854501659
CCDC137	70	-0.505879841380644	0.0611402250007865	-8.27409191533292	69	6.30216033716023e-12	-0.627851252924588	-0.3839084298367	3.09279912829399e-10
CCDC138	68	-0.618205696869979	0.0837626670378877	-7.38044428062863	67	3.14543946705693e-10	-0.785396680033042	-0.451014713706915	8.39616585538590e-09
CCDC14	70	-0.155557493377631	0.0460794224673159	-3.37585596885396	69	0.0012117360039637	-0.247483425959593	-0.0636315607956702	0.00480063011965043
CCDC142	70	-0.108039849688688	0.0508742236535112	-2.1236658160037	69	0.0372856606106111	-0.209531148913401	-0.00654855046397602	0.089915092956972
CCDC146	53	0.392878439728935	0.0933550383701514	4.20843316641548	52	0.000101984249563977	0.205547850247059	0.580209029210811	0.000545506299452168
CCDC149	55	0.235051862153227	0.0762535237332649	3.08250492102423	54	0.00322957589198542	0.0821727517690478	0.387930972537406	0.0112603666199341
CCDC150	62	-0.339119401673777	0.0901729002400148	-3.76076848777334	61	0.000382059586418755	-0.519431259721106	-0.158807543626448	0.0017487597180961
CCDC157	67	0.0587772097522925	0.0619478142060294	0.948818138389969	66	0.346174501693487	-0.0649055919233344	0.18246001142792	0.499144747566623
CCDC159	57	0.119203445437061	0.0838317580194353	1.42193660556928	56	0.160590575641646	-0.0487317457600736	0.287138636634195	0.28511446685473
CCDC167	70	-0.219841383294425	0.0551270149688377	-3.9879065358191	69	0.000163534814917947	-0.329816769055056	-0.109865997533794	0.000831554191066665
CCDC171	66	0.0878671001025482	0.0812716676484452	1.08115291152426	65	0.283624088911497	-0.0744436282363977	0.250177828441494	0.432647489788516
CCDC174	70	0.23692187819591	0.0495029205972611	4.7860181851375	69	9.34855365947875e-06	0.138166253715986	0.335677502675833	6.63795189739301e-05
CCDC18	69	-0.373681373900684	0.0870955479424709	-4.29047618079756	68	5.77779326764653e-05	-0.547477833885743	-0.199884913915624	0.000330657921215003
CCDC18-AS1	65	0.424968189082471	0.0918296631606163	4.62778773716259	64	1.85403712126586e-05	0.241517347840503	0.608419030324439	0.000121459691151563
CCDC180	45	0.490617578872708	0.199424347468167	2.46016890666283	44	0.0178847324949638	0.0887042154307581	0.892530942314658	0.0488389925154853
CCDC186	69	0.163772973154957	0.0481236251668419	3.40317198854337	68	0.00112029640407457	0.0677437742667488	0.259802172043165	0.00448806480678746
CCDC189	57	-0.0511894494679338	0.0869912339193292	-0.588443767970967	56	0.558600453010162	-0.225453831437954	0.123074932502086	0.690016045444729
CCDC191	58	0.472319663391234	0.0697706962857293	6.76959939538171	57	7.69449083865184e-09	0.332606254008378	0.61203307277409	1.32507658776154e-07
CCDC22	70	-0.0170803308516499	0.0510507050667397	-0.334575807118049	69	0.738960004742189	-0.118923700862534	0.0847630391592343	0.828110075032395
CCDC24	60	0.251443275747946	0.0731305803668878	3.43827813872779	59	0.00107974798493621	0.105109322436891	0.397777229059001	0.004343630576313
CCDC25	70	-0.0326741224719717	0.0459224115711431	-0.71150711284735	69	0.479168645195216	-0.124286826886491	0.0589385819425477	0.623246816102393
CCDC28A	70	0.450404083304029	0.0688518022849154	6.54164551045757	69	8.91382469845563e-09	0.313048496013867	0.587759670594191	1.51051535111645e-07
CCDC28B	66	-0.273462661474561	0.07540445933147	-3.6266112627696	65	0.000565168748913823	-0.424055765667243	-0.122869557281879	0.00246245507611514
CCDC3	41	-0.0752334409324676	0.0905033977226092	-0.831277530187942	40	0.410751775723426	-0.258147630808734	0.107680748943799	0.563260131620737
CCDC30	64	0.300294607397759	0.0710848711490162	4.22445173697013	63	7.86157237650026e-05	0.158242827420817	0.442346387374701	0.000434551204723471
CCDC32	70	-0.0941114758163276	0.0511222267841376	-1.84091112098288	69	0.0699340645018803	-0.196097527749415	0.00787457611676005	0.149018003725332
CCDC34	70	-0.165700919402184	0.0813667983137219	-2.03646847161541	69	0.0455430697017863	-0.328023240640099	-0.0033785981642695	0.105656174029524
CCDC40	61	0.135104904953406	0.0673177237682623	2.00697375654734	60	0.0492642055904475	0.000449408716792971	0.269760401190018	0.112533047836695
CCDC43	70	-0.1920800492766	0.0440350669184542	-4.36197927511501	69	4.41262824211453e-05	-0.279927604129511	-0.104232494423689	0.000261224765590031
CCDC47	70	0.0973711546496451	0.0416026018372158	2.34050637098715	69	0.022155035109343	0.0143762348579595	0.180366074441331	0.0583661506882952
CCDC50	70	0.0148617023876881	0.0399255502473185	0.372235380492626	69	0.710858441792291	-0.0647875910238337	0.0945109957992098	0.807634806178888
CCDC51	70	-0.277691844195072	0.0544846439367056	-5.09669925562265	69	2.8842734539475e-06	-0.386385734810354	-0.168997953579791	2.35756908182372e-05
CCDC57	68	0.0475919955942346	0.0648450875446206	0.733933708725215	67	0.465549801029854	-0.0818393408623297	0.177023332050799	0.611198173482325
CCDC58	70	0.0689458229349444	0.0734505142410243	0.938670391179319	69	0.351174282619851	-0.0775839436874558	0.215475589557345	0.504307871622771
CCDC59	70	-0.17770546716719	0.0472256038304389	-3.76290513521504	69	0.000348933858260342	-0.271917969004395	-0.0834929653299848	0.0016172275060449
CCDC6	70	0.02921629812185	0.0383973158830399	0.760894282580697	69	0.449312750912727	-0.0473842511514447	0.105816847395145	0.597808027875846
CCDC61	59	-0.0934599095044006	0.068107801491078	-1.37223500771264	58	0.175274253041132	-0.229792486555784	0.0428726675469832	0.304436926165072
CCDC66	68	-0.428183908830826	0.0635442636666484	-6.73835660567362	67	4.44018749509709e-09	-0.555018789959843	-0.30134902770181	8.15333104439103e-08
CCDC68	48	0.200698287068301	0.121535295766686	1.65135803391293	47	0.105332499883618	-0.0437991912736714	0.445195765410274	0.206002954718604
CCDC69	63	-0.56550361217791	0.10988635560331	-5.14625868765165	62	2.90130722726862e-06	-0.785163307139527	-0.345843917216293	2.36779973934042e-05
CCDC71	69	-0.293396022777561	0.0593630252643074	-4.94240348215489	68	5.31226874871196e-06	-0.411853095368172	-0.174938950186951	4.02173192436617e-05
CCDC71L	68	0.0033550333969874	0.111074184661056	0.03020533895635	67	0.975993087297579	-0.218349967103028	0.225060033897003	0.98610964658267
CCDC74A	57	0.236683532903434	0.103461646775864	2.28764513497623	56	0.0259568262688492	0.0294249492429683	0.4439421165639	0.0667534462312356
CCDC74B	46	0.357157684367448	0.129790720589965	2.75179675976823	45	0.00851196960929691	0.0957457541819137	0.618569614552983	0.0259750323116555
CCDC77	70	-0.197529293573405	0.0563456247206484	-3.50567226031694	69	0.000805082970680997	-0.309935739271216	-0.0851228478755948	0.00335620192739069
CCDC78	41	-0.457296661620004	0.103449035356316	-4.42050194131737	40	7.34332396763679e-05	-0.666374961129578	-0.24821836211043	0.000408551824053472
CCDC82	68	0.0502487724647245	0.0470808886831594	1.06728598100354	67	0.289673376013357	-0.0437250746617968	0.144222619591246	0.439202653911707
CCDC84	68	-0.114480605450444	0.0599480884603531	-1.90966231602457	67	0.060459337489594	-0.234137490825156	0.00517627992426843	0.132914670385944
CCDC85B	64	-0.10424861157471	0.0771015843182556	-1.35209428569455	63	0.181179223237444	-0.258323833410461	0.0498266102610417	0.311640627314902
CCDC85C	70	0.163327632271561	0.0774232885188344	2.10954139763553	69	0.0385277263569066	0.00887239781838714	0.317782866724734	0.0922840507338381
CCDC86	70	-0.561202828953887	0.0757996483383984	-7.40376560123953	69	2.45476127339681e-10	-0.712418989873316	-0.409986668034458	6.8406425334784e-09
CCDC88A	70	-0.0182485457095921	0.0504662157995094	-0.361599248536672	69	0.718756486089279	-0.118925891536636	0.0824288001174517	0.813577989158637
CCDC88B	57	0.438026731505198	0.0862515030291291	5.07848230027094	56	4.51895128144396e-06	0.265244208575416	0.61080925443498	3.49266123083589e-05
CCDC88C	61	-0.144327116308137	0.0843925143177428	-1.71018860469943	60	0.092397896853533	-0.313137278892225	0.0244830462759512	0.185851482408875
CCDC9	66	0.116319722109034	0.0674214635985813	1.72526248913234	65	0.0892320543024812	-0.0183302386829644	0.250969682901032	0.181109472828039
CCDC90B	70	0.115371554576338	0.0435810824497409	2.64728520016428	69	0.0100454339998769	0.0284296739578172	0.202313435194859	0.0297889955209307
CCDC91	70	0.0438906147017266	0.0496456213096293	0.884078263982035	69	0.379724160004081	-0.0551496899100686	0.142930919313522	0.533456832070664
CCDC92	69	0.323138770563523	0.0580345033930559	5.56804576020872	68	4.75058536170045e-07	0.20733272209172	0.438944819035326	4.7275677206478e-06
CCDC92B	62	0.126651910562822	0.0740099563579158	1.7112820598127	61	0.0921099940839633	-0.0213401436949128	0.274643964820557	0.185423712566519
CCDC93	70	0.0668907160188048	0.0413693633123207	1.61691432168799	69	0.110459907771713	-0.0156389056470149	0.149420337684625	0.21382508719715
CCDC97	70	-0.334145715888438	0.0512695462950834	-6.51743071735513	69	9.84997718630075e-09	-0.436425662204443	-0.231865769572433	1.6366456475395e-07
CCDC9B	67	-0.0639568549014214	0.0818362626771168	-0.781522185999155	66	0.437290005451347	-0.227348225142588	0.0994345153397452	0.587022930339008
CCHCR1	70	-0.0534143032781056	0.0526658555647666	-1.01421125139453	69	0.314025224747289	-0.158479810369737	0.0516512038135256	0.465871290485845
CCL5	68	0.126047616213867	0.0717365694774044	1.75709010246955	67	0.0834709202257052	-0.0171391757521487	0.269234408179882	0.171997394560761
CCM2	70	-0.0479621461740699	0.0452928420562648	-1.05893434804752	69	0.293322678186817	-0.138318893771392	0.0423946014232519	0.443140700354967
CCNA2	70	-0.476369530834112	0.114967666354476	-4.14350874414845	69	9.55243302673472e-05	-0.705723749713552	-0.247015311954672	0.000515929070852275
CCNB1	70	-0.617627227667488	0.117484588905831	-5.25709144850092	69	1.55404891814221e-06	-0.852002569650933	-0.383251885684042	1.35637998211289e-05
CCNB1IP1	69	0.152441795517485	0.0618711737508598	2.46385814711275	68	0.0162793067059419	0.0289797905465462	0.275903800488423	0.0450595933804846
CCNB2	70	-0.344150154647258	0.102482997915039	-3.35811950907766	69	0.00128044684279985	-0.54859814146431	-0.139702167830206	0.00503805990458026
CCNB3	42	-0.0449656827209228	0.114638860879141	-0.392237696502657	41	0.696914238443039	-0.276483559071077	0.186552193629231	0.796976291057362
CCNC	70	-0.130387421834273	0.0425506341144898	-3.06428857166836	69	0.00311185369622867	-0.21527361427088	-0.045501229397666	0.0109047612464051
CCND1	70	-0.465732033263044	0.116894021432787	-3.98422457842153	69	0.000165606944030531	-0.69892922537383	-0.232534841152258	0.000840423983638811
CCND3	70	-0.500423267026103	0.0631372320001593	-7.92596145210864	69	2.7304785527416e-11	-0.626378598527383	-0.374467935524823	1.05702400099327e-09
CCNDBP1	70	0.0922649305256541	0.0452488070948426	2.03905774426859	69	0.0452768462396202	0.00199603027272606	0.182533830778582	0.105198596762046
CCNE1	69	-0.715482582759534	0.0947278444829383	-7.5530334999695	68	1.4192216667745e-10	-0.904509053366555	-0.526456112152512	4.32433722697693e-09
CCNE2	69	-0.806815897534916	0.15102710472241	-5.34219270784442	68	1.14921247831724e-06	-1.10818579281229	-0.505446002257545	1.03709646843096e-05
CCNF	70	-0.475617137500537	0.0944018931148181	-5.03821609723503	69	3.60715045085141e-06	-0.663943761347387	-0.287290513653687	2.86890682326232e-05
CCNG1	70	0.241645619107609	0.0481151107187724	5.02223969762848	69	3.83372055730072e-06	0.145658599581816	0.337632638633401	3.0241674751794e-05
CCNG2	69	1.55424691636192	0.127179736684079	12.2208691170886	68	8.02941861597616e-19	1.30046370310141	1.80803012962243	5.08881610684524e-16
CCNH	70	-0.296317246035376	0.0494112928967147	-5.99695390798159	69	8.25957250532749e-08	-0.394890078254198	-0.197744413816554	1.02986979939952e-06
CCNI	70	0.445273836262443	0.0525748048129276	8.46933883724007	69	2.77056135534068e-12	0.340389970450735	0.550157702074151	1.53258334125105e-10
CCNJ	67	-0.259951758039812	0.0709295725485434	-3.66492774028638	66	0.000494794547062624	-0.40156721884173	-0.118336297237894	0.00219500220108997
CCNJL	68	0.0687153916220242	0.0543904103515541	1.26337328911255	67	0.210833643747186	-0.0398483218185417	0.17727910506259	0.348007819837175
CCNK	70	-0.0591373038873758	0.0427681394338779	-1.38274202876666	69	0.171202824806721	-0.144457407563657	0.0261827997889059	0.299278039309483
CCNL1	70	0.100130138451784	0.0431593146712618	2.32001224334678	69	0.0233046219555684	0.0140296615291793	0.186230615374388	0.0609637182767673
CCNL2	70	0.0933004716868186	0.0402125729134761	2.32018159811783	69	0.0232949093947654	0.013078583723414	0.173522359650223	0.0609492427688943
CCNO	46	-0.544225741003188	0.0868556038485723	-6.26586791051518	45	1.25715579915008e-07	-0.71916190705789	-0.369289574948486	1.48016082466811e-06
CCNQ	69	-0.43905949333474	0.0663250043719589	-6.61981853589394	68	6.81907076038011e-09	-0.571408978935933	-0.306710007733548	1.20048117148216e-07
CCNT1	70	-0.0290398146883076	0.0412891732869513	-0.703327588723728	69	0.484218140477885	-0.111409461630679	0.0533298322540641	0.6274272324365
CCNT2	70	0.00442258914066284	0.04389873990452	0.100745241213803	69	0.920044863108825	-0.0831530007608444	0.0919981790421701	0.950555899090822
CCNY	70	0.488248132332771	0.0656515564959534	7.4369620218047	69	2.13546662319106e-10	0.357276860706515	0.619219403959027	6.08746283437477e-09
CCNYL1	69	-0.286506600132521	0.0735391647622597	-3.8959729969568	68	0.00022592904685459	-0.433251718658911	-0.139761481606131	0.00110144134446781
CCNYL2	24	0.381263473867028	0.140468624271746	2.71422515770816	23	0.0123726795605076	0.0906819852421871	0.671844962491869	0.0356614836293113
CCP110	70	-0.0579308634843056	0.0619467745110749	-0.935171587891934	69	0.352961292246766	-0.181511297275856	0.0656495703072453	0.506068604784291
CCPG1	70	0.0563970225777171	0.0757352640388485	0.744660011336175	69	0.459006065212126	-0.0946906951785198	0.207484740333954	0.605898394381258
CCS	69	-0.0468111341933994	0.0529226790971462	-0.884519359034557	68	0.379532806588994	-0.152416696099786	0.0587944277129876	0.533346988142525
CCSAP	70	0.450975991975047	0.102485722984478	4.40037869512175	69	3.8447856770207e-05	0.246522568793212	0.655429415156882	0.000230624759025617
CCSER1	30	0.175276028793558	0.105253274215694	1.66527863479446	29	0.106625688140337	-0.0399910875639014	0.390543145151017	0.208124056163659
CCSER2	69	0.123061626842406	0.0440833514772609	2.79156694576372	68	0.00680328095992302	0.0350946685762296	0.211028585108582	0.0214118016817554
CCT2	70	-0.446927454846976	0.0513089866512131	-8.71051026372997	69	1.0051244764007e-12	-0.549286082520612	-0.34456882717334	6.2804707424001e-11
CCT3	70	-0.426240730361826	0.0452850061404079	-9.41240305986159	69	5.32850089624625e-14	-0.516581845734736	-0.335899614988916	5.60174440192106e-12
CCT4	70	-0.293636312935035	0.040972900074465	-7.16659822471376	69	6.63195196891856e-10	-0.375375012082236	-0.211897613787834	1.58012844870625e-08
CCT5	70	-0.584220858298137	0.0558906971249485	-10.4529177188837	69	7.27936535627979e-16	-0.6957197482747	-0.472721968321574	1.56767846925241e-13
CCT6A	70	-0.523657541564792	0.0581216139365897	-9.00968686341192	69	2.8655161115952e-13	-0.639606988806224	-0.407708094323359	2.246038105562e-11
CCT6P1	57	0.0465233809488214	0.0777870008603172	0.598086832430573	56	0.552193285818669	-0.10930270657162	0.202349468469263	0.684823407471191
CCT6P3	67	0.18678024941012	0.0650239563958993	2.87248361623685	66	0.00547148363444507	0.0569557316905611	0.316604767129679	0.0177491152353408
CCT7	70	-0.362775543521326	0.0431411855353333	-8.40903046635579	69	3.57094707051553e-12	-0.448839853807329	-0.276711233235322	1.91793578494371e-10
CCT8	70	-0.206679337792776	0.0352169446062698	-5.868746993911	69	1.38502282603899e-07	-0.27693521996914	-0.136423455616412	1.61188753028315e-06
CCZ1	70	-0.146472581441881	0.0454624672046566	-3.22183529509102	69	0.00194487113246975	-0.237167721951274	-0.0557774409324878	0.00725426794357557
CCZ1B	70	-0.188923240602451	0.0451442482755189	-4.18487953214853	69	8.26535569766707e-05	-0.27898355171816	-0.0988629294867414	0.000453929487708965
CCZ1P-OR7E38P	66	-0.280388133725604	0.0610503671468282	-4.59273460307389	65	2.06203246720968e-05	-0.402314136275784	-0.158462131175423	0.000133352781888178
CD109	67	0.612305200202694	0.0889720692882931	6.88199347391441	66	2.62475624610109e-09	0.434666732381129	0.78994366802426	5.17992375898704e-08
CD151	70	0.0483484545330785	0.0470432809972637	1.02774410092465	69	0.307659621153425	-0.0455003232040142	0.142197232270171	0.458429606206496
CD163L1	50	0.0924202785920054	0.117480481659288	0.786686241720042	49	0.435253939988487	-0.143665588196515	0.328506145380526	0.585423411158418
CD164	70	0.104343186618835	0.0388910250070016	2.68296314124017	69	0.00912590353447078	0.0267577145922964	0.181928658645374	0.0275303674964818
CD164L2	10	0.976271682131696	0.327422467536735	2.9816881213937	9	0.0154073133380609	0.235590601932409	1.71695276233098	0.043076005100185
CD22	28	-0.922659743219706	0.262944217118044	-3.5089562087821	27	0.00159628966139075	-1.46217671203453	-0.383142774404887	0.00610498228775337
CD24	65	0.328034787754851	0.149423538926363	2.19533542112471	64	0.0317727354774744	0.0295269529885624	0.62654262252114	0.0788951373668793
CD276	69	0.0175388943611587	0.0434951512318186	0.403237921111727	68	0.688038317029804	-0.0692543285897778	0.104332117312095	0.789880237467918
CD2AP	69	0.0891671345623976	0.0428692814089207	2.07997735515676	68	0.0412994306051541	0.00362281539817334	0.174711453726622	0.0976394804017895
CD2BP2	70	-0.181049070155312	0.0407979733397382	-4.43769764364657	69	3.36116453889529e-05	-0.26243880001509	-0.0996593402955337	0.000205140201345671
CD320	70	-0.173206592025598	0.0585107716542292	-2.9602513713059	69	0.00421057005342234	-0.289932387671589	-0.0564807963796073	0.0141900432885163
CD33	14	0.1159608504596	0.195882986356966	0.591990415381352	13	0.564011390580651	-0.307218613600318	0.539140314519517	0.694247704471088
CD3EAP	70	-0.779891737757539	0.0842848621061548	-9.25304637474857	69	1.03567973593515e-13	-0.948035436979159	-0.61174803853592	9.57074394248932e-12
CD40	46	0.03584302796839	0.10836617851271	0.330758438290653	45	0.742362152611167	-0.182417659414126	0.254103715350905	0.830648958540495
CD44	68	0.0934363730715884	0.0817092212869205	1.14352299042832	67	0.256890907216822	-0.0696559152180065	0.256528661361183	0.40245455921206
CD46	70	0.112265814212483	0.0380666169188883	2.94919336939495	69	0.00434643174764714	0.0363249913215033	0.188206637103463	0.0145792452784377
CD47	70	0.0289105949340713	0.0406231413869407	0.711677973367303	69	0.479063481331753	-0.052130354723059	0.109951544591202	0.623207232537182
CD55	68	0.220413263525393	0.0882480940889938	2.49765466099604	67	0.0149640136908927	0.0442693304969508	0.396557196553835	0.0420166774292888
CD58	69	-0.117994338139382	0.0549605460659003	-2.14689166293764	68	0.0353712403966717	-0.227666400268304	-0.00832227601045867	0.0861918987673263
CD59	70	0.0656929161123712	0.0625753924598519	1.04982028126343	69	0.297463888313212	-0.0591415761739464	0.190527408398689	0.447648844678675
CD63	70	0.0545826123343791	0.0521531483281354	1.04658326647814	69	0.298944274028378	-0.0494600718062423	0.158625296475001	0.449023692205951
CD68	70	0.435415092043125	0.130079240699598	3.34730653178291	69	0.00132412204620821	0.175914107208832	0.694916076877418	0.0051893419132492
CD81	69	0.113065274965897	0.0450875741164956	2.50768148833563	68	0.0145452582866836	0.0230944216228894	0.203036128308904	0.0410121926166537
CD82	70	0.351947183038117	0.0855870640280075	4.11215394563535	69	0.000106545932848481	0.181205662062953	0.52268870401328	0.000567442359421161
CD83	61	-0.42587688798549	0.151591201957813	-2.80937734172733	60	0.00669116942808416	-0.729104439098226	-0.122649336872754	0.0211218898895351
CD9	69	0.0320992870902925	0.0998970415810626	0.321323700704841	68	0.748950667503	-0.167242155726473	0.231440729907058	0.83490650246967
CD99	70	0.322616824586631	0.0467464601699502	6.90141720707265	69	2.00605563866978e-09	0.229360188198095	0.415873460975166	4.08616401992407e-08
CD99L2	70	-0.0672062763064345	0.0432246905454783	-1.55481220243148	69	0.124565905706533	-0.153437174529566	0.0190246219166967	0.234480729835567
CD99P1	62	0.227974658655419	0.0812036910142248	2.80744207323634	61	0.00669638972880607	0.0655978429147333	0.390351474396105	0.0211323540993564
CDA	39	1.02225094351895	0.14481898136435	7.05881876732075	38	2.04785648658856e-08	0.729080242821282	1.31542164421662	3.12417830711881e-07
CDADC1	68	-0.146746953036931	0.0621568761368272	-2.36091261590905	67	0.0211471970435566	-0.270812597066154	-0.0226813090077085	0.0562387153602894
CDAN1	69	-0.3117284735355	0.0512355133800831	-6.08422660319588	68	6.05518702077932e-08	-0.413967348671314	-0.209489598399686	7.92425713834376e-07
CDC123	70	-0.404499598260484	0.0519886427564727	-7.78053776389696	69	5.03665818349803e-11	-0.508214102765157	-0.30078509375581	1.80198631977989e-09
CDC14A	65	-0.041771487027921	0.0610062740487272	-0.684708051413812	64	0.49600042478254	-0.163645529794495	0.0801025557386533	0.638035341134673
CDC14B	64	-0.00959709244919168	0.0645383782304451	-0.148703650639061	63	0.882262449760338	-0.138566750215628	0.119372565317245	0.925726145223839
CDC16	70	0.0117496703070143	0.0404773144636804	0.290277911533808	69	0.772474255660295	-0.0690003625981587	0.0924997032121873	0.852314138918824
CDC20	70	-0.664937460916901	0.113601057211783	-5.85326824623893	69	1.47390479347114e-07	-0.891565369152882	-0.438309552680919	1.70104870597174e-06
CDC23	70	-0.202208874096378	0.0422675752982058	-4.78401878200383	69	9.41862465797568e-06	-0.286530379645233	-0.117887368547522	6.68556582922293e-05
CDC25A	69	-1.01653601157239	0.131001805137526	-7.75970995594471	68	5.98493388424989e-11	-1.27794604368555	-0.755125979459231	2.08410994380582e-09
CDC25B	70	-0.281985512021002	0.0811900796444589	-3.4731523020528	69	0.000892667851521632	-0.443955289159907	-0.120015734882098	0.00367504793660966
CDC25C	70	-0.381574221800578	0.117945577192997	-3.23517194015847	69	0.00186778253019119	-0.616869210253924	-0.146279233347232	0.00700797565708743
CDC26	70	-0.10464152717322	0.04832896647251	-2.16519273659082	69	0.0338335180739378	-0.201055177254425	-0.00822787709201445	0.0830215877423196
CDC27	70	-0.163853311986874	0.0437890847267572	-3.74187569823198	69	0.000374083481737394	-0.251210145794261	-0.0764964781794874	0.00171566218805768
CDC34	70	0.0753000136203587	0.0506675228204056	1.4861593665683	69	0.141792107325937	-0.0257789287250507	0.176378955965768	0.258994773114619
CDC37	70	-0.176190470007393	0.0412761189090328	-4.26858131685524	69	6.15373278763117e-05	-0.258534074178389	-0.0938468658363964	0.000349736358430015
CDC37L1	68	-0.15773991434093	0.0514084273053442	-3.06836685362932	67	0.00310502556366115	-0.2603515647097	-0.0551282639721613	0.0108842726063735
CDC40	70	-0.0384408287920828	0.0434575538205201	-0.884560344810101	69	0.379465826526355	-0.125136276538105	0.0482546189539399	0.533315020212102
CDC42	70	-0.0856082860237857	0.0430390241737146	-1.98908520040446	69	0.0506581706258143	-0.171468789969827	0.000252217922255868	0.115091193314172
CDC42BPA	70	0.0867165708730826	0.0388829488833155	2.23019532631931	69	0.0289899777878314	0.00914721027246335	0.164285931473702	0.073049606644289
CDC42BPB	70	0.0538894137172631	0.0387535448246515	1.39056733935171	69	0.16882554978228	-0.0234217928498283	0.131200620284354	0.295968414231449
CDC42BPG	61	0.223568438885149	0.0732028355706125	3.05409533855408	60	0.00336394076735209	0.0771409663279845	0.369995911442313	0.0116847688852809
CDC42EP1	64	0.0717055298122886	0.0710637362633746	1.00903123847211	63	0.316819478057972	-0.0703040154658143	0.213715075090392	0.46870012420181
CDC42EP2	66	-0.122819719074105	0.0814048317250514	-1.50875220145328	65	0.136207800637896	-0.285396394438478	0.0397569562902668	0.250990778157723
CDC42EP3	64	0.189446871600082	0.100122349098634	1.89215368302487	63	0.0630678905101793	-0.010631677816133	0.389525421016297	0.137383084287223
CDC42EP4	70	-0.094823277802055	0.0467221746175239	-2.02951336444194	69	0.0462648611292464	-0.188031465839124	-0.00161508976498587	0.107045702468858
CDC42SE1	70	-0.218076089687234	0.0413194093550295	-5.2778123669062	69	1.43397718172244e-06	-0.300506055934989	-0.135646123439479	1.26403334477519e-05
CDC42SE2	70	-0.103717221804197	0.0443823266591018	-2.33690366439875	69	0.0223533982031365	-0.192257540884564	-0.0151769027238304	0.0588078780549459
CDC45	70	-0.920747294243122	0.145474528437437	-6.32926811403343	69	2.13465000770547e-08	-1.21096103776428	-0.630533550721968	3.23961414814159e-07
CDC5L	70	-0.0537987518098264	0.0392778604940305	-1.36969659582153	69	0.175222755904374	-0.132155939517614	0.0245584358979614	0.304416601775597
CDC6	70	-0.873045100617431	0.133238440933282	-6.55250162417167	69	8.52333538393545e-09	-1.13884851747332	-0.607241683761544	1.44877107652457e-07
CDC7	68	-0.635138283896988	0.110768915029185	-5.73390362927762	67	2.55779690445103e-07	-0.856233963661559	-0.414042604132417	2.73299859992932e-06
CDC73	70	0.0430131649023939	0.0417770093070692	1.02958937501339	69	0.306798446499917	-0.0403296882716362	0.126356018076424	0.457690708202378
CDCA2	70	-0.26429559659562	0.142506703113445	-1.85461870088471	69	0.0679239757351096	-0.548588690593836	0.0199974974025952	0.145607577636449
CDCA3	69	-0.443484630723696	0.110195707117199	-4.02451821695765	68	0.000145963517933051	-0.663376740653009	-0.223592520794383	0.000752618027612956
CDCA4	70	-0.311618249228869	0.0866440311625821	-3.59653452231622	69	0.000601526935534876	-0.484468361943071	-0.138768136514667	0.00259896191742007
CDCA5	70	-0.534921415072658	0.112816305050399	-4.74152574695376	69	1.10350199937679e-05	-0.759983785582291	-0.309859044563024	7.70471556505383e-05
CDCA7	69	-0.978883073987923	0.121103971617985	-8.08299728662694	68	1.54869920299996e-11	-1.22054228682437	-0.737223861151471	6.58108155573663e-10
CDCA7L	70	0.0796301030334319	0.0579370333466771	1.374424930544	69	0.173757489712744	-0.0359511160064367	0.195211322073301	0.302360712848406
CDCA8	70	-0.570029332748821	0.122083696036017	-4.66916837593656	69	1.44305088748383e-05	-0.813579642415218	-0.326479023082424	9.74421759091821e-05
CDCP1	54	0.766131366119203	0.100675202487564	7.60993121631753	53	4.71389034081395e-10	0.564202481901955	0.96806025033645	1.18822176749926e-08
CDH1	37	-0.0826962880006608	0.222860087572928	-0.371068184084778	36	0.712761559830149	-0.534677494665293	0.369284918663972	0.808844166376035
CDH15	30	0.236240498732442	0.276389019136253	0.854739090108281	29	0.399701950166668	-0.329038515965007	0.80151951342989	0.552996236424689
CDH22	9	0.738170668543641	0.780698557432514	0.945525851836163	8	0.372068775996755	-1.06212343324366	2.53846477033095	0.525555771770144
CDH24	58	-0.25027579642508	0.0689010530936019	-3.63239435665927	57	0.000603078267582014	-0.388247775353794	-0.112303817496366	0.00260515718237668
CDH3	54	0.320539086810788	0.0708033995581931	4.52717085353137	53	3.41969975456036e-05	0.178525451692051	0.462552721929524	0.000208052056927202
CDIP1	65	0.192414805082329	0.0515580607129207	3.73200237599528	64	0.000405828448189011	0.0894157382770151	0.295413871887643	0.00184431195200341
CDIPT	70	-0.079279335684848	0.0479352561567969	-1.65388363474108	69	0.102693914061069	-0.174907555176841	0.016348883807145	0.201874902667726
CDK1	70	-0.446789378035423	0.125043028862349	-3.5730850580024	69	0.000648786694176553	-0.696243395155488	-0.197335360915357	0.00277986989573581
CDK10	70	-0.135210778767041	0.0476875608861289	-2.83534691761453	69	0.00600120822703213	-0.230344859714471	-0.0400766978196109	0.0192173813905048
CDK11A	68	-0.0919335533350246	0.0474599098274849	-1.937078129082	67	0.0569536440882162	-0.186663929831972	0.00279682316192249	0.126714717468888
CDK11B	NA	NA	NA	NA	NA	NA	NA	NA	NA
CDK12	70	-0.249252716781383	0.0444254050052239	-5.61058963338824	69	3.88312552294855e-07	-0.337878974810837	-0.16062645875193	3.97670777239357e-06
CDK13	70	0.0145727217663615	0.0409754557006286	0.355645142126825	69	0.723191315949673	-0.0671710757155372	0.0963165192482602	0.817168242595673
CDK14	66	-0.0570713200456906	0.0581262184597907	-0.981851590520552	65	0.329813516606862	-0.173157394403214	0.0590147543118325	0.481564206514837
CDK16	70	-0.0292414842992352	0.0387420684576935	-0.754773440431222	69	0.452953438513113	-0.106529796140682	0.0480468275422111	0.600786565421773
CDK17	70	0.0169237143435729	0.0455207313335005	0.371780370125954	69	0.711195676222879	-0.0738876599225224	0.107735088609668	0.807816242623514
CDK18	46	1.32663654655688	0.206026973137837	6.43914011040352	45	6.9443643796151e-08	0.911676921759094	1.74159617135466	8.90403992304174e-07
CDK19	70	0.732865803065241	0.0680145597809851	10.7751311693431	69	1.96406184814344e-16	0.597180468869627	0.868551137260854	5.00768045005952e-14
CDK2	70	-0.285677145980382	0.0713923585714782	-4.0015087286178	69	0.000156093767669976	-0.428101004386244	-0.143253287574519	0.000798356457102929
CDK20	58	0.0351391273470151	0.0738481387882288	0.475829559466381	57	0.636014488913947	-0.112739219809342	0.183017474503372	0.749950743838463
CDK2AP1	70	0.0683394398739941	0.051478322948096	1.32753819394813	69	0.188706262343157	-0.0343570044687197	0.171035884216708	0.321135219338413
CDK2AP2	70	0.136723442339267	0.104697112989299	1.30589505704175	69	0.195925295704452	-0.0721415831936987	0.345588467872233	0.329898001719064
CDK4	70	-0.337813374571844	0.0560327717698614	-6.02885354233975	69	7.25931337683099e-08	-0.449595695709879	-0.226031053433808	9.21729189037579e-07
CDK5	70	-0.206452426219945	0.0497664781464629	-4.14842347518253	69	9.38996473123857e-05	-0.305733833624266	-0.107171018815625	0.000508561044605637
CDK5R1	67	-0.242213147835443	0.0797634853891772	-3.03664197538073	66	0.00342322021487538	-0.401466084695097	-0.0829602109757893	0.0118578319161165
CDK5RAP1	70	-0.37711859162409	0.0469645019775506	-8.02986459441975	69	1.76276855910928e-11	-0.470810209516999	-0.28342697373118	7.28151437209722e-10
CDK5RAP2	70	-0.164493893201656	0.0472459233017798	-3.48165263171942	69	0.000868941025599688	-0.25874693127505	-0.0702408551282619	0.0035853515308505
CDK5RAP3	70	0.0339510225409804	0.0413809647567744	0.820450241808881	69	0.414784913249815	-0.048601743373261	0.116503788455222	0.56700307793846
CDK6	70	0.149332009616145	0.0655969698882084	2.27650773916295	69	0.0259217594572952	0.0184696352927362	0.280194383939554	0.0666817196198217
CDK7	69	0.0979798561056143	0.0456473178195849	2.14645374111283	68	0.0354074889889288	0.00689205159352874	0.1890676606177	0.0862612763044942
CDK8	70	0.0801818387582644	0.0470223200388469	1.70518678559508	69	0.0926582263463986	-0.0136251230109383	0.173988800527467	0.186240012397228
CDK9	69	-0.0686552314252598	0.0434723877717403	-1.57928365439107	68	0.11891187434441	-0.155403030598838	0.0180925677483187	0.226259812587218
CDKAL1	69	-0.105079879775758	0.0494978517099514	-2.12291798826961	68	0.0374038981269527	-0.203851305035488	-0.00630845451602811	0.0900873741150663
CDKL3	55	0.27779385189189	0.0843449032698925	3.29354639251866	54	0.00174969347279236	0.108692502261857	0.446895201521923	0.0066208974093279
CDKL5	68	0.403025846542926	0.0606705736645419	6.64285537782	67	6.56484914171736e-09	0.281926874664994	0.524124818420859	1.16311089186561e-07
CDKN1A	66	0.268141904914956	0.120681844904411	2.22189099882707	65	0.0297779042070699	0.0271236176016713	0.50916019222824	0.0746787417887194
CDKN1B	69	0.447767997706768	0.0622740008597717	7.1902879456075	68	6.43641305241822e-10	0.323502163755258	0.572033831658278	1.53849692164592e-08
CDKN1C	61	1.23295441677264	0.1464259807923	8.4203254784514	60	9.43225714435146e-12	0.9400588463075	1.52584998723778	4.37711983213398e-10
CDKN2A	50	-0.0789672694314835	0.0561320548732621	-1.40681237502849	49	0.165794219170427	-0.191768856913971	0.0338343180510037	0.291946286388697
CDKN2AIP	69	-0.134770998408064	0.0583590239648215	-2.30934291309093	68	0.0239687837651275	-0.251224617598435	-0.0183173792176931	0.062447211825001
CDKN2AIPNL	70	-0.223260865129482	0.0504046953320329	-4.42936642427429	69	3.4637269335273e-05	-0.323815480981998	-0.122706249276965	0.000210384421794914
CDKN2B	54	0.0219473700463787	0.131414134164371	0.167009204800811	53	0.867998380132039	-0.241636003281974	0.285530743374731	0.917036744205883
CDKN2C	66	-0.00686764401086155	0.075094803116899	-0.0914529864359693	65	0.927413921668061	-0.156842322038855	0.143107034017131	0.955144192146018
CDKN2D	68	0.387398497776823	0.0821637823986659	4.71495452700961	67	1.26775777790506e-05	0.223398901710769	0.551398093842876	8.67944537947223e-05
CDKN3	70	-0.4271035534095	0.0892897759199365	-4.78334220249887	69	9.44245189994498e-06	-0.60523178249693	-0.24897532432207	6.70033487026806e-05
CDON	64	0.514092196947008	0.0727694713119531	7.06466857156571	63	1.54156321680808e-09	0.368674012166532	0.659510381727483	3.25047103376777e-08
CDPF1	68	-0.101860525831029	0.0622541660074207	-1.63620416694502	67	0.106486280678023	-0.226120361254718	0.0223993095926607	0.207911159052892
CDR2	69	-0.0817152205777022	0.0639029928949174	-1.27873855160548	68	0.205336120707978	-0.209231657524892	0.0458012163694876	0.341257648126497
CDR2L	68	0.0385235187066068	0.0562219693399162	0.685204007595231	67	0.495579066165494	-0.0736960017756201	0.150743039188834	0.63776897963565
CDS1	45	0.0433926577975867	0.0750461411055146	0.578213045445957	44	0.566068133322368	-0.107852901573599	0.194638217168772	0.695845017088211
CDS2	70	0.128428518202137	0.0413055141770385	3.10923422116676	69	0.00272535582861134	0.0460262720760069	0.210830764328267	0.00973491835591894
CDT1	70	-0.219633677172449	0.101369762124646	-2.16665870146152	69	0.0337169299285147	-0.421860819353523	-0.017406534991375	0.0827699136425756
CDV3	70	-0.120389693817386	0.0358272828626803	-3.36027976999591	69	0.00127188564581678	-0.19186316750004	-0.0489162201347317	0.00501166616296566
CDX2	10	-0.40338813922707	0.207314322389375	-1.94578037145659	9	0.0835307568898214	-0.872365718570852	0.0655894401167116	0.172084608192934
CDYL	70	0.0756441322380917	0.0468942749081705	1.613078193153	69	0.111292206239818	-0.0179073864847414	0.169195650960925	0.21489238499405
CEACAM19	53	0.321017972126267	0.110131874697719	2.91485070064748	52	0.00523823222473525	0.100022197628635	0.542013746623899	0.0171176292293868
CEBPB	64	0.296838343026096	0.127049297055669	2.33640287593271	63	0.0226647280610266	0.0429505818209904	0.550726104231201	0.0595324764074298
CEBPD	64	0.831178322979213	0.11669513612551	7.12264752907311	63	1.22126939284317e-09	0.59798170134463	1.0643749446138	2.63779918909905e-08
CEBPG	70	-0.0604830333873721	0.0790068106669386	-0.765542019438611	69	0.446559633569584	-0.218097308089627	0.0971312413148826	0.59550233208131
CEBPZ	70	-0.314980048117695	0.0456608362457991	-6.89825404033579	69	2.03264774776551e-09	-0.406070924036214	-0.223889172199176	4.13273990292709e-08
CEBPZOS	70	0.109119713670595	0.0419073975968811	2.6038293935655	69	0.0112789266216882	0.0255167429756212	0.192722684365569	0.0329152940826586
CECR2	52	0.529743482531987	0.112428628889003	4.7118201810945	51	1.93079868657884e-05	0.304033591855563	0.755453373208412	0.000125856527962656
CECR7	67	0.0531183498791848	0.0719023289175276	0.738757014951656	66	0.462673700809824	-0.0904392816773567	0.196675981435726	0.609009496283142
CELF1	70	-0.0457380753889552	0.0356323972519145	-1.28360926899179	69	0.203572769155405	-0.116822762915942	0.0253466121380314	0.338961955067196
CELF5	37	1.00448030782922	0.321764419938876	3.12178800881725	36	0.00353554864659628	0.351911818022231	1.65704879763621	0.0122177192831903
CELSR1	60	0.164890813806645	0.0934279596408008	1.76489794319168	59	0.0827563032565239	-0.0220581016188151	0.351839729232104	0.170746936920864
CELSR2	62	-0.073370937010772	0.0829983734475694	-0.88400451675262	61	0.38016477747766	-0.23933644207275	0.0925945680512054	0.533790042664227
CELSR3	60	0.397115211991256	0.0673160360966244	5.89926613357393	59	1.89931347065238e-07	0.262416134890688	0.531814289091825	2.12888182951041e-06
CEMIP	55	0.595582978352962	0.303819131666889	1.96032084972834	54	0.0551261786441541	-0.013537706081264	1.20470366278719	0.123329187562746
CEMIP2	70	-0.0298945349568476	0.0711410766654725	-0.420214823250722	69	0.675634265753491	-0.171817099676425	0.112028029762729	0.779756466334231
CENPA	70	-0.442095591394695	0.125539312742122	-3.52157090665959	69	0.000765290263605689	-0.692539667765305	-0.191651515024086	0.00320779830447872
CENPB	69	-0.37876231993235	0.0487849672056282	-7.76391461607159	68	5.88066448452785e-11	-0.476111206312005	-0.281413433552695	2.05102043389618e-09
CENPBD1	69	-0.123812266152396	0.0581534364237808	-2.12906190530411	68	0.0368735158372006	-0.239855641791932	-0.00776889051286107	0.0890989464379938
CENPBD1P1	70	0.157432420497907	0.0587853422839244	2.67808971388703	69	0.00924680894888357	0.0401588714330818	0.274705969562731	0.0278420953039413
CENPC	69	-0.044646572888613	0.0532864231884681	-0.837860194344497	68	0.405044586629439	-0.150977974828224	0.0616848290509979	0.558171778613091
CENPE	70	-0.423545857548675	0.1150273759476	-3.68213091935278	69	0.000455326134556713	-0.653019193807157	-0.194072521290193	0.00204000087189194
CENPF	70	-0.278076661076445	0.118528056839857	-2.34608301604195	69	0.0218510720827354	-0.514533664630689	-0.0416196575222012	0.0576887028016229
CENPH	70	-0.209180807813477	0.0892617103919205	-2.3434550704331	69	0.0219938470348229	-0.387253047704469	-0.031108567922485	0.0580173046648165
CENPI	70	-0.556455479996275	0.118763979246691	-4.68538932027892	69	1.3590387766458e-05	-0.793383135874353	-0.319527824118197	9.22466283462579e-05
CENPJ	70	-0.307236376103243	0.0632703550796826	-4.85592937982266	69	7.19422837242946e-06	-0.433457280881662	-0.181015471324823	5.25806832808008e-05
CENPK	69	-0.452015813348116	0.108940722930875	-4.14919050642733	68	9.488411967697e-05	-0.669403641324184	-0.234627985372049	0.000512779596936525
CENPL	68	-0.335123423735995	0.0755443672032441	-4.43611398364594	67	3.4937049183578e-05	-0.485910611773225	-0.184336235698765	0.000211973092174542
CENPM	70	-0.887094065347267	0.112381857334227	-7.89357006895718	69	3.12950987566711e-11	-1.11128973637742	-0.662898394317116	1.1968756562422e-09
CENPN	70	-0.444704778176191	0.0581777035999978	-7.64390394701326	69	8.94983154668758e-11	-0.560766121234474	-0.328643435117907	2.9498538390583e-09
CENPO	70	-0.541759238624344	0.0759446051739359	-7.13361057554455	69	7.6131002009273e-10	-0.693264580518217	-0.390253896730471	1.7609362737953e-08
CENPP	67	-0.428820035513011	0.079342899269621	-5.40464287870054	66	9.59572358412294e-07	-0.587233245091254	-0.270406825934769	8.88736286192129e-06
CENPQ	67	-0.202440939400238	0.0675123883661465	-2.99857469568875	66	0.00382192235256068	-0.337233771850576	-0.0676481069499001	0.0130603576003783
CENPS	70	-0.473163921949413	0.0843574538323599	-5.60903512912697	69	3.90713617861505e-07	-0.6414524377024	-0.304875406196426	3.99208174638595e-06
CENPT	69	-0.0922606641915808	0.0468256901054346	-1.97030014899605	68	0.0528775065575931	-0.185699873989737	0.00117854560657576	0.119272813754376
CENPU	70	-0.606865536803803	0.11632565752507	-5.21695341952408	69	1.81538174789429e-06	-0.838928873942777	-0.374802199664829	1.55609978612357e-05
CENPV	63	-0.510780629195978	0.0891758776620194	-5.72778920250003	62	3.194625776769e-07	-0.689040668648808	-0.332520589743148	3.33473830495482e-06
CENPW	70	-0.567448400242222	0.095152921285225	-5.96354155582119	69	9.45350548596156e-08	-0.757273284294241	-0.377623516190202	1.15919103753233e-06
CENPX	70	-0.423062551798917	0.0680850969797495	-6.2137320877247	69	3.42370710292958e-08	-0.5588886038558	-0.287236499742034	4.88076291498611e-07
CEP104	69	-0.0323502646957919	0.0442678013331318	-0.730785440468209	68	0.467420784682399	-0.120685286918765	0.0559847575271812	0.612878908519332
CEP112	65	0.391451120754445	0.067133936563454	5.83089776635474	64	1.96795140970763e-07	0.25733566487055	0.52556657663834	2.19032103211915e-06
CEP120	70	0.0518733344964479	0.046072638271946	1.12590327886723	69	0.264107330596399	-0.0400390639860651	0.143785732978961	0.410944781656098
CEP126	63	0.148267365986156	0.0819268844060756	1.8097522816962	62	0.0751816610007113	-0.0155021424208754	0.312036874393187	0.157999015094058
CEP128	66	-0.318194879909013	0.0997338538414567	-3.19044003267772	65	0.00218786531179843	-0.517377140165813	-0.119012619652212	0.00803896444364962
CEP131	69	-0.129926075584587	0.0516911945726171	-2.51350499168797	68	0.0143278113565754	-0.23307424838274	-0.0267779027864348	0.0404710953153643
CEP135	70	0.0975435675887017	0.0512452827384306	1.90346432639644	69	0.0611517870120227	-0.00468797425620453	0.199775109433608	0.134115820956836
CEP152	70	-0.18286386186661	0.0784384499275204	-2.3313038699207	69	0.0226648527301751	-0.339344287917635	-0.0263834358155841	0.0595324764074298
CEP162	67	0.00176386129208367	0.0558822531199755	0.031563890029573	66	0.974915099038554	-0.109808656938146	0.113336379522314	0.985772954744984
CEP164	69	-0.0947216265115162	0.0449995234058457	-2.10494732704683	68	0.0389935067827079	-0.184516777397031	-0.00492647562600103	0.0932263383761616
CEP170	70	0.17521255333291	0.0497303700953948	3.52325054080253	69	0.00076119701449114	0.0760031795195158	0.274421927146304	0.00319365844059816
CEP170B	69	-0.0914006206723872	0.0434332462722406	-2.10439302877538	68	0.0390434563720843	-0.178070314199784	-0.00473092714499002	0.0933356988086618
CEP192	66	-0.117905908404071	0.0466155671662758	-2.52932476362468	65	0.0138629746680613	-0.211003624713034	-0.0248081920951079	0.0393636077940266
CEP250	70	0.567561013484672	0.0785327856006136	7.2270582170746	69	5.14920430067412e-10	0.410892392915129	0.724229634054216	1.27905542886398e-08
CEP290	69	0.0824149607914844	0.0479850803411151	1.71751219765842	68	0.0904369218853361	-0.0133377762013758	0.178167697784345	0.18288556853501
CEP295	69	-0.056213588525797	0.046516496681945	-1.20846565273726	68	0.231053874887839	-0.149035812453578	0.0366086354019836	0.372267421776406
CEP350	70	0.291081612478158	0.0470116317124519	6.19169345702714	69	3.74569669638693e-08	0.197295973336692	0.384867251619624	5.26200406075078e-07
CEP41	70	-0.324336261782932	0.0494068690107504	-6.5645985725661	69	8.10819464831712e-09	-0.422900268590732	-0.225772254975132	1.38884921767545e-07
CEP44	69	0.112829621701085	0.0495992899374538	2.27482332596629	68	0.0260746989007874	0.0138557796099152	0.211803463792255	0.0670129731221488
CEP55	69	-0.432429637783853	0.123321058249193	-3.5065352497223	68	0.000808944185604331	-0.678512978111169	-0.186346297456538	0.00337103135921008
CEP57	70	0.195627610471608	0.0467327616332926	4.18609137646687	69	8.23030031611206e-05	0.102398301915972	0.288856919027244	0.000452116200128771
CEP57L1	69	-0.118851699625402	0.0492138994712865	-2.41500269034249	68	0.0184294652121146	-0.217056507014866	-0.020646892235938	0.05007378703272
CEP63	70	0.0686996990807094	0.0478832305297189	1.43473400438324	69	0.155880054170977	-0.0268247321250763	0.164224130286495	0.278916783223409
CEP68	70	0.104790817102858	0.0580260443917084	1.80592729008824	69	0.0752912425602935	-0.0109679741131897	0.220549608318906	0.158169366651428
CEP70	69	-0.038363569395456	0.0649154557545592	-0.590977432870625	68	0.556494859413788	-0.167900344523288	0.0911732057323755	0.688559568555849
CEP72	63	-0.32955163451657	0.0974033538779425	-3.38337050415672	62	0.0012454799936919	-0.5242581645821	-0.13484510445104	0.00492348221716318
CEP76	66	-0.277835383097556	0.0610249857232436	-4.55281356979871	65	2.38153197818047e-05	-0.399710695444527	-0.155960070750585	0.000151391859500535
CEP78	70	-0.512321943688807	0.0736364780796266	-6.95744768149842	69	1.58845548277301e-09	-0.659222698018403	-0.365421189359212	3.32720675343446e-08
CEP83	66	-0.385103130795316	0.0732558624158838	-5.2569598950188	65	1.74477119350452e-06	-0.531405190638027	-0.238801070952605	1.50417857031936e-05
CEP85	69	-0.341186026988445	0.0538831162475379	-6.33196538635671	68	2.21596422602675e-08	-0.44870811138903	-0.233663942587861	3.34612106614877e-07
CEP85L	67	0.358835514872318	0.0650174499520045	5.51906473011797	66	6.15751848620532e-07	0.229023987687133	0.488647042057503	5.93336555434433e-06
CEP89	70	0.0799444345812539	0.0466293163451552	1.71446722464247	69	0.0909316890237356	-0.0130785062710985	0.172967375433606	0.18358484808633
CEP95	NA	NA	NA	NA	NA	NA	NA	NA	NA
CEP97	70	-0.150096594549279	0.0497945397449755	-3.01431834329635	69	0.00360118346775367	-0.249433983310893	-0.0507592057876649	0.012399451954356
CEPT1	69	0.0141845374252272	0.0462804324433924	0.306491030363144	68	0.760167313291815	-0.0781666276487001	0.106535702499155	0.843059414201242
CERCAM	68	0.342286468916298	0.0695577375672077	4.92089709768918	67	5.89579312747419e-06	0.203448643645052	0.481124294187544	4.41676741484743e-05
CERK	70	0.145454335530921	0.0471813037803364	3.08288079973622	69	0.00294616149234779	0.0513302098755574	0.239578461186285	0.0104196036708002
CERS2	70	-0.107992576000659	0.0360496481097707	-2.99566241733687	69	0.00380153522048417	-0.179909656213476	-0.0360754957878427	0.013005135063086
CERS4	52	-0.152760968524851	0.0898110003083705	-1.70091601251894	51	0.0950493544697721	-0.333064075139766	0.0275421380900644	0.18989325235058
CERS5	70	0.0678574910224726	0.0453314996587126	1.49691696796602	69	0.138975451758999	-0.0225763763816113	0.158291358426557	0.255027954335852
CERS6	69	-0.0510092934416472	0.0424994397389072	-1.20023449144318	68	0.234213030101232	-0.135815605043811	0.0337970181605169	0.37622662276092
CES2	70	0.0504997774031452	0.0440450492162039	1.14654832499464	69	0.255528840239839	-0.0373676915888934	0.138367246395184	0.40077357945274
CES3	58	0.217260059636949	0.0834105248219161	2.6047079802076	57	0.0117070128128482	0.0502333647397268	0.384286754534171	0.0340021258901997
CETN2	70	0.0387865737854889	0.0449035752155915	0.863774735068788	69	0.390704395247297	-0.0507936077127783	0.128366755283756	0.544213808186847
CETN3	70	-0.101408501155475	0.0491452522579276	-2.06344451389233	69	0.0428345467283015	-0.199450596821717	-0.00336640548923402	0.100556240398686
CFAP20	70	-0.163756592044583	0.0454347828686801	-3.6042120530847	69	0.000586778394005802	-0.254396503814849	-0.0731166802743168	0.00254664807979587
CFAP298	70	-0.338900086539528	0.0446170223455721	-7.59575759930024	69	1.09582648873727e-10	-0.427908610703564	-0.249891562375491	3.46262438364246e-09
CFAP36	70	0.383433406666805	0.0493267842680941	7.7733307037171	69	5.19178340905346e-11	0.285029164549187	0.481837648784424	1.85151349806469e-09
CFAP410	67	0.151502192524495	0.0753354263782417	2.01103517704722	66	0.048409356321411	0.00109016073109591	0.301914224317893	0.110908525296585
CFAP43	31	0.438899995307954	0.136269401870229	3.22082572671687	30	0.00306917168540829	0.16060074923174	0.717199241384167	0.0107773256808179
CFAP44	65	0.562016355294674	0.107405118044475	5.2326775997951	64	1.9724113603831e-06	0.347449965951734	0.776582744637615	1.6761801980726e-05
CFAP46	30	0.370803983315784	0.428735502565714	0.864878185027258	29	0.394203872066138	-0.506058575166276	1.24766654179784	0.54767820933052
CFAP53	37	0.695026442666393	0.145083635860837	4.79052264262978	36	2.84471945092649e-05	0.400783191136597	0.989269694196188	0.000177152068670554
CFAP69	53	0.0629696272919047	0.114818039651402	0.548429737026398	52	0.58574386496285	-0.167429625138027	0.293368879721836	0.711709597535382
CFAP74	11	0.956034958480867	0.445549061785033	2.14574564392671	10	0.0574754374160564	-0.0367102165483988	1.94878013351013	0.127607733133273
CFAP97	70	-0.0675210311056591	0.057381148149708	-1.17671105028251	69	0.243354337863144	-0.181993289520508	0.0469512273091901	0.386710073965202
CFD	42	0.376412513780679	0.131965286174561	2.85236007659444	41	0.00676926599550728	0.109903211675131	0.642921815886226	0.021331987258466
CFDP1	70	0.251574548466844	0.0563238624840559	4.46657131403337	69	3.02802051495549e-05	0.139211517243147	0.363937579690542	0.000187096242514604
CFL1	70	-0.14437933674803	0.0561198828190511	-2.57269490767749	69	0.0122455077866537	-0.256335439674251	-0.0324232338218085	0.0353408604896633
CFL2	70	-0.0801641784955789	0.049322325825028	-1.62531221216054	69	0.108655409804882	-0.178559526262644	0.018231169271486	0.211105745843206
CFLAR	70	-0.0215869988291389	0.0449595288575415	-0.480142905801779	69	0.632644461832932	-0.111278804788873	0.0681048071305951	0.747088982771406
CGB2	15	0.352347783977987	0.280262166849712	1.25720780631418	14	0.22924776020142	-0.248754780608275	0.953450348564248	0.370342569134652
CGGBP1	70	0.159301400739072	0.0431325815829111	3.69329622510206	69	0.00043896490573494	0.0732542548685049	0.24534854660964	0.00197587652983207
CGN	53	-0.109652917164729	0.101584026983184	-1.07943069812423	52	0.285377229726058	-0.313496180355835	0.0941903460263774	0.434470673286438
CGNL1	62	0.126530056991732	0.0946668497996535	1.33658252344418	61	0.186322997892292	-0.0627680085848288	0.315828122568293	0.318178053746798
CGREF1	54	0.0724376919667555	0.0705352894885166	1.02697093174259	53	0.309098501997348	-0.0690381824534233	0.213913566386934	0.460150291232383
CGRRF1	68	-0.132602340269112	0.0563690768641847	-2.35239510110487	67	0.0215987743084568	-0.245115488598719	-0.0200891919395052	0.0571518563414277
CHAC1	64	-0.104966959748413	0.201773062643354	-0.520222860144361	63	0.60473164701756	-0.508178251217205	0.298244331720379	0.72591359890381
CHAC2	64	-1.41869478062817	0.139105147987859	-10.1987223416922	63	5.78008440670027e-15	-1.69667423752566	-1.14071532373069	9.09317959641316e-13
CHAF1A	70	-0.679782229841826	0.106872226675092	-6.36070053923805	69	1.87655685244223e-08	-0.892986488449602	-0.466577971234051	2.8886734282355e-07
CHAF1B	70	-0.625983715839832	0.0877084219305373	-7.137099289457	69	7.50284533491404e-10	-0.800957230036449	-0.451010201643216	1.74270277716297e-08
CHAMP1	70	-0.384441921977709	0.0589980464780198	-6.51618053355269	69	9.90087495632469e-09	-0.502139804299319	-0.2667440396561	1.64387131947002e-07
CHCHD1	70	-0.250323175102079	0.0451376733393466	-5.54577045254726	69	5.01888885699719e-07	-0.340370369579016	-0.160275980625141	4.95676725850007e-06
CHCHD10	68	-0.353645904902941	0.0654198649785376	-5.40578775298546	67	9.2549424128949e-07	-0.484224501919309	-0.223067307886573	8.61828306002498e-06
CHCHD2	69	-0.0610375149685741	0.0388808497078761	-1.5698606236018	68	0.12108945436389	-0.138623042588234	0.0165480126510858	0.229377137207499
CHCHD3	70	-0.313172509628659	0.0431391727472411	-7.25958542282635	69	4.49338501127307e-10	-0.399232804512286	-0.227112214745031	1.1443428969008e-08
CHCHD4	70	-0.397894052700969	0.050066834249682	-7.94725807341207	69	2.4962549681921e-11	-0.497774654136306	-0.298013451265632	9.7830260961903e-10
CHCHD5	62	-0.0660560918866608	0.0630279629157989	-1.04804421451646	61	0.298753120507591	-0.192088293047279	0.0599761092739572	0.448847777882546
CHCHD6	70	-0.0548285613887479	0.0694912169991599	-0.788999873025835	69	0.432814797943326	-0.193459746131444	0.0838026233539483	0.583094363001099
CHCHD7	70	-0.153466328060206	0.050981489754452	-3.01023624063094	69	0.00364416498413353	-0.255171617301187	-0.0517610388192258	0.012536424888035
CHD1	70	-0.13600261929177	0.0448054565436155	-3.03540304648786	69	0.00338658146846024	-0.225387059395242	-0.0466181791882974	0.0117560485341761
CHD1L	70	0.183483318251658	0.069912720886884	2.62446255737245	69	0.010677061555506	0.0440112562606967	0.322955380242619	0.0314151186396384
CHD2	70	0.37091610748917	0.0460557974307251	8.05362469398307	69	1.59490174950138e-11	0.279037305565637	0.462794909412702	6.71311396725609e-10
CHD3	NA	NA	NA	NA	NA	NA	NA	NA	NA
CHD4	70	-0.219256686591954	0.0442071534648389	-4.95975581794347	69	4.86145624767904e-06	-0.307447544711577	-0.131065828472332	3.72107738046986e-05
CHD5	34	0.496161287889793	0.256240422899651	1.93631154005744	33	0.0614327686548814	-0.025163772324435	1.01748634810402	0.134587819684205
CHD6	70	0.279638060509311	0.042251460898012	6.61842347142293	69	6.49149346158052e-09	0.195348702309239	0.363927418709383	1.15219108826262e-07
CHD7	70	-0.0569818147340411	0.0501839835038763	-1.13545818317989	69	0.260112136317512	-0.157096122536916	0.0431324930688342	0.406496224305696
CHD8	70	-0.111863336978366	0.0382251916635033	-2.92642972108813	69	0.00463898578276814	-0.188120507829067	-0.0356061661276648	0.0153998776763488
CHD9	70	0.125301837350708	0.0403657353786388	3.10416337458866	69	0.00276660433014525	0.0447743986296607	0.205829276071756	0.00986161292805429
CHDH	61	-0.148307829322376	0.0788393709151921	-1.88113917704786	60	0.0648076753524097	-0.306010051253009	0.00939439260825742	0.140400806198569
CHEK1	70	-0.304636114501223	0.065658154516879	-4.63973007987772	69	1.60862411644491e-05	-0.435620548819073	-0.173651680183373	0.000107026095233896
CHEK2	70	-0.258982104659133	0.0562933524879306	-4.60058058746207	69	1.8577220249981e-05	-0.371284270105946	-0.14667993921232	0.000121643314038428
CHERP	70	-0.222783879474102	0.0422835974807067	-5.26880144424217	69	1.48502980258364e-06	-0.307137348402478	-0.138430410545726	1.30407486464411e-05
CHIC2	68	0.250160513635831	0.0543919913954039	4.5992159363551	67	1.93741523853122e-05	0.141593644418533	0.35872738285313	0.000126176584912212
CHID1	70	-0.158261947286324	0.0424583928312734	-3.72745967835488	69	0.000392314266359447	-0.242964123397894	-0.0735597711747527	0.00179170579707335
CHKA	70	-0.0959677475343461	0.0458904670466571	-2.09123492765448	69	0.0401909022023035	-0.187516724366204	-0.00441877070248785	0.095562108702181
CHKB	67	0.174792693213468	0.0524552534151706	3.33222474077146	66	0.00141484503870811	0.070062400657612	0.279522985769325	0.00550019149117127
CHKB-CPT1B	57	0.244674229080349	0.0879876594708343	2.78077892458831	56	0.00737320857777806	0.0684137668722536	0.420934691288445	0.0229676327302728
CHM	70	0.0317621289169155	0.0431544943026004	0.736009758200354	69	0.464219566351487	-0.0543287316333286	0.11785298946716	0.610175303437347
CHML	69	-0.103541946244016	0.0782331833489848	-1.3235041936378	68	0.19010037750654	-0.25965383302377	0.0525699405357374	0.322879523265702
CHMP1A	70	-0.122679750482729	0.0398215669890361	-3.08073638881428	69	0.00296484381597788	-0.202121602969892	-0.0432378979955657	0.0104756555473115
CHMP1B	70	0.148306665885345	0.0512837226507892	2.89188573331976	69	0.00511789288607317	0.0459984385135215	0.250614893257168	0.0167749645085052
CHMP2A	70	0.100331270891251	0.0471308263426761	2.12878234219294	69	0.0368443974162666	0.00630784496871344	0.194354696813788	0.0890479868694298
CHMP2B	70	0.0324851055469817	0.0447980981119937	0.725144747568749	69	0.470815368894292	-0.0568846548870644	0.121854865981028	0.615743559507882
CHMP3	70	0.00958730547863939	0.0378418679031655	0.253351803435618	69	0.800749715593011	-0.0659051553938744	0.0850797663511531	0.872193969618668
CHMP4A	70	-0.149217303436393	0.0459111271201413	-3.25013374308841	69	0.00178471704946744	-0.240807495987124	-0.0576271108856615	0.00673275401212362
CHMP4B	69	0.00916712163711437	0.0392795427884668	0.233381576931338	68	0.816166246167915	-0.0692139856380404	0.0875482289122691	0.882356938907139
CHMP4C	52	0.169188269866233	0.0698711739039714	2.4214316206961	51	0.0190553604477608	0.0289160351237044	0.309460504608761	0.0514717493244312
CHMP5	70	0.142364512716445	0.0420872066579601	3.38260778087345	69	0.00118650590198399	0.0584028327594763	0.226326192673413	0.00471498995302919
CHMP6	69	-0.377614261271826	0.0588750607698731	-6.41382371982288	68	1.58660404642796e-08	-0.495097615874152	-0.2601309066695	2.48925029429686e-07
CHMP7	70	-0.0795229002585092	0.0419450158393953	-1.89588437784831	69	0.0621636864386965	-0.163200917293911	0.00415511677689286	0.135800166691271
CHORDC1	69	-0.542588330852907	0.0953666265798273	-5.68949904502211	68	2.93988321316005e-07	-0.732889471288224	-0.35228719041759	3.09798049569198e-06
CHP1	70	-0.0402360001997227	0.0410201193505755	-0.980884522930043	69	0.33007652388846	-0.122068899225305	0.0415968988258596	0.481757958474393
CHPF	61	0.290215561442412	0.0999682248610245	2.90307807151591	60	0.00516309224097268	0.0902493389822729	0.490181783902551	0.016901964594046
CHPF2	70	-0.0666107049176833	0.0618424400580576	-1.07710343988933	69	0.285185508516333	-0.18998299717055	0.0567615873351829	0.434294817085951
CHPT1	70	-0.195865082290442	0.0459924967919737	-4.25863121057221	69	6.37434629159567e-05	-0.287617602894924	-0.104112561685959	0.000361071883146515
CHRAC1	70	0.0727837727004603	0.0466883498141063	1.55892793363345	69	0.12358862480723	-0.0203569367001139	0.165924482101034	0.233155543074841
CHRD	45	0.457350193047672	0.145601864313144	3.14110121601228	44	0.00300705786523034	0.163908916932401	0.750791469162943	0.0105978006937622
CHRFAM7A	40	0.0695219635652245	0.121817485002595	0.570705950494245	39	0.571472903323247	-0.176877157251239	0.315921084381688	0.700006181540464
CHRM4	30	1.65775312155734	0.233280165524516	7.10627548565897	29	8.07843625697456e-08	1.18064161210497	2.1348646310097	1.00898577169037e-06
CHRNA5	70	-0.610874480130257	0.0775283443711561	-7.87936960456399	69	3.32234401542085e-11	-0.76553929527435	-0.456209664986164	1.26625833247535e-09
CHRNA7	56	-0.200712724354707	0.116049705186502	-1.72954101031229	55	0.0893214832844305	-0.43328153063596	0.0318560819265464	0.181191508204411
CHRNB1	68	0.358227133293165	0.0593325529031813	6.03761536904909	67	7.63001936573303e-08	0.239798862032767	0.476655404553563	9.58180537193303e-07
CHST11	68	-0.109663936277658	0.0972783305222031	-1.12732132314532	67	0.263627788021431	-0.303832296665609	0.0845044241102938	0.410429168177452
CHST12	NA	NA	NA	NA	NA	NA	NA	NA	NA
CHST14	69	-0.0207304398079196	0.0578307057689317	-0.358467695185151	68	0.721103843912279	-0.136129816452484	0.0946689368366444	0.815432578795992
CHST15	62	0.65634985363014	0.14667344691752	4.47490576804422	61	3.40220432555527e-05	0.363058169881362	0.949641537378917	0.000207214981739338
CHST2	59	-0.0448115970401448	0.176840732414188	-0.253400879019145	58	0.800854520261439	-0.398796783022674	0.309173588942385	0.872265293549998
CHST3	63	-0.179411137624269	0.0599640102357188	-2.99198030483623	62	0.00397447225248591	-0.299277486132569	-0.0595447891159691	0.0135051690417651
CHST6	67	0.00518333072578043	0.0706822194551034	0.0733328801180731	66	0.941763024031722	-0.135938273690858	0.146304935142419	0.964592852152729
CHST7	60	-0.144518132297131	0.0827827166494268	-1.74575247281561	59	0.0860595692430446	-0.310165965698225	0.0211297011039628	0.176120801268495
CHSY1	70	0.431708700141416	0.0785301721764869	5.49736092735419	69	6.07501815531454e-07	0.275045293210352	0.588372107072481	5.86661091515834e-06
CHTF18	70	-0.502096662061251	0.0889462601718632	-5.6449440492618	69	3.3881078356596e-07	-0.679539595982045	-0.324653728140457	3.51355811176256e-06
CHTF8	59	-0.0143222611177372	0.0462649859407049	-0.309570203611284	58	0.757997294077626	-0.10693169237898	0.0782871701435054	0.841494218368945
CHTOP	70	-0.116008854769754	0.0414528530110797	-2.79857347186083	69	0.00664890436574897	-0.198705033827322	-0.0333126757121864	0.0210183834460658
CHUK	70	-0.493630215527286	0.0766449125440015	-6.4404824683425	69	1.35221003855205e-08	-0.646532632398238	-0.340727798656335	2.17195677589873e-07
CHURC1	70	0.0668644143085358	0.0461835300030569	1.44779782541763	69	0.1522022609022	-0.0252692071245302	0.158998035741602	0.273797141149719
CHURC1-FNTB	67	0.322412255799422	0.107156549094185	3.00879655536535	66	0.00371082208911921	0.108467302620255	0.536357208978588	0.0127301972751071
CIAO1	70	-0.180994622280539	0.0406040007852967	-4.45755636833895	69	3.12843391712352e-05	-0.261997387482178	-0.0999918570789009	0.000192646236073771
CIAO2A	70	-0.217498054149109	0.0428941219750248	-5.07057946717613	69	3.18764635588499e-06	-0.303069486118235	-0.131926622179983	2.57384300081809e-05
CIAO2B	70	-0.037399614844625	0.0455105778422324	-0.821778509916421	69	0.414033559374801	-0.128190733449868	0.0533915037606176	0.566369812377661
CIAO3	69	-0.275786778364363	0.050847403976927	-5.42381236394108	68	8.36316401279988e-07	-0.377251193244183	-0.174322363484543	7.87067051896169e-06
CIAPIN1	70	-0.441319807931642	0.0588786733788762	-7.49541018174459	69	1.67067735546719e-10	-0.558779547436428	-0.323860068426857	4.98104369609854e-09
CIB1	70	0.255176174634011	0.0550557549829083	4.63486832054575	69	1.63769244823607e-05	0.14534294865559	0.365009400612431	0.000108764352954409
CIB2	57	0.167687668451467	0.0752188834830816	2.22932940089683	56	0.0298208674507239	0.0170061382318843	0.31836919867105	0.0747442352307297
CIC	70	0.332580217791741	0.0626508439075854	5.30847147537742	69	1.27285413357023e-06	0.207595203985704	0.457565231597778	1.13391367031545e-05
CILP2	34	0.359236011844328	0.16796253271132	2.13878658558783	33	0.0399452564825868	0.017513669644813	0.700958354043843	0.0950816267085246
CINP	69	-0.20313567160466	0.0491976856273066	-4.12896804015333	68	0.000101796313467539	-0.301308124772203	-0.104963218437117	0.000544763769683222
CIP2A	70	-0.579128154906911	0.103583951083931	-5.59090620551499	69	4.19818970749769e-07	-0.785772483200492	-0.372483826613331	4.25030780884134e-06
CIPC	70	-0.0668434001774455	0.0461423164720898	-1.44863555382784	69	0.1519687417634	-0.158894802865868	0.0252080025109772	0.273506744811013
CIR1	70	0.317070110931072	0.0527489163393928	6.01093127470154	69	7.80553595861655e-08	0.211838902127925	0.422301319734219	9.78197057004434e-07
CIRBP	70	-0.00989127619903082	0.0614494917213404	-0.160965956299289	69	0.872590575777579	-0.132479657969189	0.112697105571127	0.919471648151106
CISD1	70	-0.360711243131525	0.0448917337822501	-8.03513726783588	69	1.72405338033441e-11	-0.45026780161664	-0.27115468464641	7.15806501856795e-10
CISD2	70	-0.0594414407923775	0.0443307298382425	-1.34086312156989	69	0.18436253028074	-0.147878827031537	0.0289959454467821	0.315769411372665
CISD3	70	-0.537526613189447	0.0639452321412765	-8.40604678706725	69	3.6160715411435e-12	-0.665093860867654	-0.409959365511239	1.9374806503779e-10
CISH	57	0.0574191823326923	0.0837165026990749	0.685876505604752	56	0.495620848929733	-0.110285124713632	0.225123489379017	0.63776897963565
CIT	70	-0.209348411746844	0.121337806612411	-1.72533538879243	69	0.0889434696447517	-0.451410712727442	0.0327138892337535	0.180738736135936
CITED2	67	0.733363562145905	0.100258701578125	7.31471234518677	66	4.45314829642013e-10	0.533190605884664	0.933536518407147	1.13801538607363e-08
CIZ1	70	-0.0315098380603032	0.0502017025972605	-0.62766472908476	69	0.532295385484049	-0.131659494487285	0.0686398183666788	0.667944335066072
CKAP2	70	-0.254367085295558	0.0799523084572994	-3.18148519040459	69	0.00219666823312235	-0.413867576479687	-0.094866594111429	0.0080673004548212
CKAP2L	70	-0.336273392571411	0.12640437782577	-2.66029862537605	69	0.00970069012806286	-0.588443226564413	-0.0841035585784081	0.0289532707778109
CKAP4	69	-0.105836027287514	0.0377255369329798	-2.80542136419512	68	0.00654701985223321	-0.181116164158784	-0.0305558904162431	0.0207436072507124
CKAP5	70	-0.174121156339605	0.0485948524906953	-3.58311935143635	69	0.00062814721254687	-0.27106523451373	-0.0771770781654802	0.00270502066952333
CKB	67	0.558427827892658	0.129646283785225	4.30731843280415	66	5.61303350015684e-05	0.299580670637683	0.817274985147632	0.000322476843047084
CKLF	NA	NA	NA	NA	NA	NA	NA	NA	NA
CKMT1A	41	-0.486803511937433	0.111834675691653	-4.35288526502845	40	9.05404927875876e-05	-0.712829822760717	-0.260777201114149	0.000492126736342629
CKMT1B	37	-0.444141462254496	0.0999245913661683	-4.44476636013415	36	8.07989233316455e-05	-0.646797926554645	-0.241484997954347	0.00044473491745473
CKMT2-AS1	68	-0.00652472166054668	0.0639014005533646	-0.10210608224616	67	0.918977449264413	-0.134072450998979	0.121023007677886	0.949930890711205
CKS1B	70	-0.26578392207404	0.0855565510962874	-3.10652917477845	69	0.0027472878903711	-0.436464571415967	-0.0951032727321137	0.00980221006662565
CKS2	70	-0.370053557059603	0.0876030702275197	-4.22420762307202	69	7.19813736723828e-05	-0.544816900359311	-0.195290213759895	0.000401683227874414
CLASP1	70	0.150169138392052	0.0400211493279755	3.75224452354948	69	0.000361474163059055	0.0703291300328852	0.230009146751219	0.0016642216448684
CLASP2	70	-0.155020293056263	0.0424882836058924	-3.64854213679662	69	0.000508123764377676	-0.239782099631615	-0.0702584864809124	0.00224436506201227
CLASRP	69	-0.00679446926491661	0.0489538742284184	-0.138793290051236	68	0.89002371834753	-0.10448040436085	0.0908914658310165	0.930357919105257
CLBA1	63	0.121678312641601	0.0602386253964365	2.01993840066608	62	0.0477165358152465	0.00126301624888073	0.242093609034321	0.109585786110976
CLCC1	70	-0.224799907338923	0.0438183971968746	-5.1302631250729	69	2.53569559615744e-06	-0.312215217924176	-0.13738459675367	2.10032859275446e-05
CLCF1	58	0.0343711420577606	0.0838484326125475	0.409919911283077	57	0.683401290474774	-0.133532448064555	0.202274732180077	0.785939829184542
CLCN2	66	-0.109285473114902	0.0920124978002324	-1.18772423016024	65	0.239264154407108	-0.293047120517582	0.074476174287778	0.382044160168332
CLCN3	70	0.0074033231801662	0.0481372451475525	0.153796154255882	69	0.878219396106133	-0.0886278533228368	0.103434499683169	0.923204251141623
CLCN4	60	-0.139421507238827	0.100990379770172	-1.38054245915417	59	0.172627676822256	-0.34150279039032	0.0626597759126657	0.301063537013231
CLCN5	69	-0.407990322236875	0.074745991274367	-5.45835723469479	68	7.30695543422952e-07	-0.557143625573801	-0.25883701889995	6.94145119666292e-06
CLCN6	68	0.118869616438166	0.0562490265241342	2.11327419839282	67	0.0383051851047278	0.00659608959020389	0.231143143286128	0.0918281223379523
CLCN7	70	-0.109355306056849	0.0647369236927362	-1.68922617602108	69	0.0956903889660604	-0.23850193516582	0.0197913230521219	0.190793742936059
CLDN12	70	0.157118115219169	0.0520318574971639	3.01965224339209	69	0.00354573128561135	0.0533173996656883	0.260918830772649	0.0122458725772024
CLDN15	65	0.181369531063648	0.0655854928106141	2.76539099259914	64	0.00742060868664976	0.0503474471828444	0.312391614944452	0.023092584439852
CLDN23	41	-0.184379973967166	0.134632079909611	-1.36950995699505	40	0.178480043776577	-0.456481557418229	0.0877216094838964	0.308504973977404
CLDN3	32	1.54829731555015	0.418982487521284	3.69537477499342	31	0.00084511489837707	0.693776898445875	2.40281773265442	0.0035000632329724
CLDN4	41	0.525511076412889	0.140251945265575	3.7469075770593	40	0.00056508976512502	0.242051321394053	0.808970831431725	0.00246245507611514
CLDN7	48	0.640587778417138	0.0986244092551841	6.4952255050741	47	4.77371470578093e-08	0.442181058675819	0.838994498158456	6.49236907441033e-07
CLDND1	70	0.27245490869478	0.0500551885929796	5.44309024405498	69	7.52036511521184e-07	0.172597539708887	0.372312277680672	7.13196831918038e-06
CLEC11A	56	0.0971808845010013	0.0972110979952008	0.999689197068826	55	0.321838994240138	-0.0976345093140909	0.291996278316094	0.473697880477815
CLEC12A-AS1	51	0.138484538685806	0.0714872734295799	1.93719150335511	50	0.058381720245306	-0.0051018757604156	0.282070953132027	0.129243844159818
CLEC16A	69	-0.153094554022922	0.044817762512151	-3.41593478660197	68	0.00107647818989624	-0.242527006692121	-0.0636621013537239	0.00433444167875811
CLEC2D	67	0.282152453731827	0.0796062479524014	3.54435061303898	66	0.000728835248275421	0.123213451543767	0.441091455919887	0.00307591770876054
CLHC1	65	0.180287543261988	0.0639596117897007	2.81877169384288	64	0.00640770707525702	0.052513530111055	0.30806155641292	0.0203487127191627
CLIC1	70	0.00221521144162956	0.05753531580705	0.0385017690536101	69	0.969398802041409	-0.112564603034392	0.116995025917651	0.982186391369617
CLIC3	39	0.943063445867353	0.25822582523093	3.65208803195411	38	0.000780822919480613	0.420312592298506	1.4658142994362	0.00326611616064849
CLIC4	70	0.104746310417837	0.0483943094491835	2.16443444714973	69	0.0338939629151153	0.00820230466490715	0.201290316170766	0.08313090285085
CLINT1	70	0.00211661336530665	0.0491231326984675	0.0430879149808921	69	0.965755900308636	-0.0958813549872056	0.100114581717819	0.980292965391496
CLIP1	70	-0.0883201724246277	0.0401648580681685	-2.19894147950751	69	0.0312370084294044	-0.168446871876153	-0.00819347297310194	0.0777315818915245
CLIP2	62	0.335242800036205	0.0636294063601546	5.26867716066165	61	1.89645818774055e-06	0.208007938379213	0.462477661693197	1.61797059694081e-05
CLIP4	68	0.0238870499525608	0.0701542592727027	0.340493224505548	67	0.734550432233706	-0.11614143762621	0.163915537531332	0.8249188784836
CLK1	70	0.791404955504318	0.0804265896224459	9.84009093534222	69	9.02954404914353e-15	0.630958299284308	0.951851611724328	1.29221513611679e-12
CLK2	70	0.124717392088876	0.0493139204063455	2.52905043973807	69	0.0137267889465556	0.0263388126732742	0.223095971504479	0.0390472995406358
CLK3	70	0.644901896533034	0.0810645065772834	7.95541629453097	69	2.4119470044782e-11	0.483182630808752	0.806621162257316	9.50298551569011e-10
CLK4	68	0.456512894020569	0.0696820389592749	6.55137106833762	67	9.5395128257149e-09	0.31742696213234	0.595598825908798	1.59221575244551e-07
CLMN	68	0.452188250491481	0.0988862719342588	4.57281118649212	67	2.13284887094079e-05	0.254810425612283	0.649566075370678	0.000137132909145532
CLN3	70	-0.196783228889855	0.0520939326130995	-3.77746925637885	69	0.000332472158442487	-0.300707780911263	-0.0928586768684468	0.00154902277222668
CLN5	70	0.0573284903444165	0.048921446307565	1.17184782281368	69	0.245288602772438	-0.0402671246672753	0.154924105356108	0.38886572456755
CLN6	70	-0.570155321152604	0.0709051542195403	-8.04109838598275	69	1.68130615773469e-11	-0.711607233470347	-0.42870340883486	7.01028819377271e-10
CLN8	70	0.206033694427127	0.064781422647446	3.18044411510389	69	0.00220355203773713	0.0767982923324808	0.335269096521774	0.00808856384264189
CLNS1A	70	-0.0718658154811294	0.0387162198744213	-1.85621984052759	69	0.0676923818315693	-0.14910256080989	0.00537092984763098	0.145206254587416
CLOCK	70	-0.106745586866905	0.0437134482193628	-2.4419392936296	69	0.0171756332081097	-0.19395152997065	-0.0195396437631594	0.0472106438441499
CLP1	69	-0.35228707724797	0.0547559799532516	-6.43376444999684	68	1.46239750313125e-08	-0.461550934054678	-0.243023220441261	2.32370353971758e-07
CLPB	70	-0.269295567012345	0.0604413757967634	-4.45548373878619	69	3.1519729647772e-05	-0.389872812540871	-0.148718321483818	0.000193890915986378
CLPP	70	-0.0721909233088713	0.0463371442287682	-1.55794934086706	69	0.12382043582923	-0.164630996737215	0.0202491501194726	0.233473725566473
CLPTM1	70	-0.103904825054709	0.0400090271714531	-2.59703452946856	69	0.0114837691900839	-0.183720650373301	-0.0240889997361181	0.0334561661806192
CLPTM1L	70	-0.269428734144894	0.0410886860154443	-6.55724872885012	69	8.35796722468432e-09	-0.351398419924186	-0.187459048365603	1.42612637675344e-07
CLPX	70	0.054145448406918	0.0411603285820468	1.31547658321015	69	0.192704272802316	-0.0279671603821438	0.13625805719598	0.326019351101429
CLSPN	70	-0.88086187734691	0.112386824343032	-7.83776819476906	69	3.95834916930083e-11	-1.1050674572885	-0.656656297405317	1.48568699278225e-09
CLSTN1	70	0.32813312941822	0.058962620036518	5.56510428496891	69	4.64960547127275e-07	0.210505920913658	0.445760337922782	4.64374374442919e-06
CLSTN3	61	0.313234932419347	0.0533300039892171	5.87352163863856	60	1.99637035079308e-07	0.206559041591705	0.41991082324699	2.21861157922305e-06
CLTA	70	-0.0876041678335533	0.0367261289015766	-2.38533628383014	69	0.0198144370995447	-0.160870790300391	-0.0143375453667157	0.053217561901211
CLTB	70	-0.293050292244926	0.063405518537937	-4.62184205732166	69	1.71811987113389e-05	-0.41954084074468	-0.166559743745171	0.000113426592206822
CLTC	70	-0.138625921271967	0.0403508689698067	-3.43551266208658	69	0.00100529842703705	-0.219123702318876	-0.0581281402250584	0.00407944869543776
CLTCL1	63	0.19032013040216	0.070656204326142	2.6936081865318	62	0.00908088020343521	0.0490803904525113	0.331559870351808	0.0274169163839118
CLU	64	0.0391541933059731	0.0895654667123317	0.437157252043686	63	0.663492178809469	-0.139828110035071	0.218136496647017	0.769909160407597
CLUAP1	70	-0.0426080482421776	0.0481782158042985	-0.88438410453498	69	0.379560255892563	-0.13872095896901	0.0535048624846549	0.533346988142525
CLUH	48	-1.05676689018822	0.483968783879885	-2.1835434957526	47	0.0340225889302185	-2.03038650009991	-0.0831472802765312	0.0834094902354229
CLUHP3	44	-0.041666504956335	0.0888393745305611	-0.469009436148175	43	0.641432208766903	-0.220828178556397	0.137495168643727	0.754134163081965
CLYBL	57	-0.00159694473928893	0.0913352577810888	-0.0174844280082557	56	0.986112302226764	-0.184563452192833	0.181369562714255	0.992240557405039
CMAS	70	-0.00711541114140565	0.0426552337537003	-0.166812147425833	69	0.868005747062786	-0.0922102741486776	0.0779794518658664	0.917036744205883
CMBL	68	0.0533547391560649	0.053158210457032	1.00369705257839	67	0.319135896990691	-0.0527494930012059	0.159458971313336	0.471090202106042
CMC1	70	-0.10523806376121	0.0514688862462535	-2.04469285108866	69	0.0447020862653125	-0.207915682398849	-0.0025604451235707	0.104146439382879
CMC2	70	-0.270412642476385	0.0478287657372413	-5.65376585216439	69	3.27137818558238e-07	-0.365828419394132	-0.174996865558637	3.40364497713829e-06
CMC4	69	0.0600739439295885	0.058829714014847	1.0211496849097	68	0.310802792016462	-0.0573189226319415	0.177466810491119	0.462141542600158
CMIP	70	0.461698984316116	0.0591326726279831	7.80784909251045	69	4.48967719974635e-11	0.343732530173883	0.579665438458348	1.64611602718634e-09
CMSS1	70	-0.533075896402822	0.0706442966694308	-7.54591554499112	69	1.35123661339796e-10	-0.674007412146978	-0.392144380658665	4.13993515999912e-09
CMTM3	66	0.0701364464331506	0.0476432159614314	1.47211822329391	65	0.145814533364422	-0.025013626241131	0.165286519107432	0.264793940162882
CMTM4	70	-0.00164942771397917	0.0449026081613811	-0.0367334500492953	69	0.970803604992854	-0.0912276799918833	0.087928824563925	0.983079916272608
CMTM6	70	-0.238136741708109	0.048135357187237	-4.94723121679153	69	5.09774902572334e-06	-0.334164151833337	-0.142109331582882	3.88051712040477e-05
CMTM7	62	-0.106897457944557	0.0546574488233726	-1.95577108419385	61	0.0550763043765313	-0.216191781707427	0.00239686581831264	0.123242467838214
CMTM8	52	-0.0897036936771344	0.0907173619432354	-0.988826083073984	51	0.327416557554159	-0.271826397200241	0.0924190098459726	0.479041889035443
CMTR1	70	-0.152198851759363	0.0411488480362248	-3.69873906616721	69	0.0004311939247671	-0.234288557486174	-0.0701091460325513	0.00194603125924391
CMTR2	69	-0.113225163295803	0.0478218467523365	-2.367645145161	68	0.0207526653573639	-0.208652172733689	-0.0177981538579161	0.0553221515391235
CNBP	70	-0.146617104636295	0.0418858054216893	-3.50040074818221	69	0.000818704585830632	-0.230177000120368	-0.0630572091522226	0.00340530754226422
CNDP2	61	-0.46262049589754	0.0783692751296575	-5.90308504362406	60	1.7825990101373e-07	-0.61938238625223	-0.30585860554285	2.01640036934552e-06
CNEP1R1	68	-0.0526382942259804	0.0514412924869223	-1.02326927806805	67	0.309861054982197	-0.155315543771736	0.0500389553197752	0.461143101081187
CNFN	36	0.795695703608538	0.150846515844088	5.27486961933516	35	6.98047644055617e-06	0.489460995844515	1.10193041137256	5.11532634305969e-05
CNIH1	70	-0.0363143005551515	0.0390507583582621	-0.929925616859843	69	0.355651658473684	-0.114218431898427	0.041589830788124	0.508873449542879
CNIH4	70	0.100321333081663	0.0406098310915037	2.4703706069502	69	0.015972877296727	0.0193069367373884	0.181335729425938	0.0443608819576811
CNKSR1	32	-0.192895210939728	0.0993428602807193	-1.9417118693246	31	0.0613077349016957	-0.395506310285735	0.00971588840627866	0.134340430266661
CNKSR3	70	0.248106202658305	0.0948485804082169	2.6158135587321	69	0.0109257076089744	0.0588884620435029	0.437323943273108	0.0320531736783852
CNN2	69	0.0848325299332898	0.0673331227314864	1.25989299904578	68	0.212014826581654	-0.0495286245335438	0.219193684400123	0.349373217683251
CNN3	66	0.0882698857919103	0.0527249921556682	1.67415645186437	65	0.0989056194250422	-0.0170291947618457	0.193568966345666	0.195798701480258
[truncated: 21,418 more rows]
