# Supplementary material for: Formal Meta-Analysis of Hypoxic Gene Expression Profiles Reveals a Universal Gene Signature
Source: Biomedicines. 2022 Sep 8;10(9):2229. doi: 10.3390/biomedicines10092229 (PMC9496516; doi:10.3390/biomedicines10092229)
Supplement: Supplementary file 1 [file biomedicines-10-02229-s001.zip › S6_GSEA_DN.csv]

NAME	SIZE	ES	NES	NOM.p.val	FDR.q.val	FWER.p.val	RANK.AT.MAX	LEADING.EDGE
REACTOME_TRANSCRIPTIONAL_REGULATION_BY_TP53	349	-0.2753221	---	---	1	0	5185	tags=42%, list=25%, signal=55%
REACTOME_M_PHASE	345	-0.5262751	---	---	1	0	4520	tags=50%, list=22%, signal=63%
REACTOME_CELL_CYCLE_MITOTIC	486	-0.5634452	---	---	1	0	3544	tags=47%, list=17%, signal=56%
REACTOME_METABOLISM_OF_AMINO_ACIDS_AND_DERIVATIVES	342	-0.26057726	---	---	1	0	3551	tags=30%, list=17%, signal=35%
REACTOME_CLASS_I_MHC_MEDIATED_ANTIGEN_PROCESSING_PRESENTATION	361	-0.19123618	---	---	1	0	4657	tags=29%, list=22%, signal=36%
REACTOME_DNA_REPLICATION	126	-0.71164817	-3.239133	0.0	0	0	3540	tags=69%, list=17%, signal=83%
REACTOME_SYNTHESIS_OF_DNA	115	-0.71157783	-3.1881616	0.0	0	0	4313	tags=77%, list=21%, signal=96%
REACTOME_DNA_REPLICATION_PRE_INITIATION	84	-0.7389577	-3.1512892	0.0	0	0	3540	tags=74%, list=17%, signal=88%
REACTOME_G2_M_CHECKPOINTS	129	-0.6962379	-3.148084	0.0	0	0	4816	tags=71%, list=23%, signal=92%
REACTOME_MITOTIC_G1_PHASE_AND_G1_S_TRANSITION	146	-0.6533047	-3.1047652	0.0	0	0	3540	tags=60%, list=17%, signal=72%
REACTOME_TRNA_PROCESSING	107	-0.6886948	-3.0515325	0.0	0	0	3635	tags=65%, list=17%, signal=79%
REACTOME_S_PHASE	156	-0.65790546	-2.976178	0.0	0	0	3540	tags=60%, list=17%, signal=72%
REACTOME_CELL_CYCLE_CHECKPOINTS	252	-0.64391094	-2.9709542	0.0	0	0	4567	tags=64%, list=22%, signal=81%
REACTOME_MRNA_SPLICING	187	-0.597995	-2.9691145	0.0	0	0	6187	tags=69%, list=30%, signal=97%
PID_ATR_PATHWAY	37	-0.79682404	-2.9433374	0.0	0	0	3207	tags=73%, list=15%, signal=86%
REACTOME_ORC1_REMOVAL_FROM_CHROMATIN	66	-0.716914	-2.9299998	0.0	0	0	3540	tags=71%, list=17%, signal=85%
REACTOME_MITOCHONDRIAL_TRANSLATION	94	-0.67073834	-2.902731	0.0	0	0	5647	tags=83%, list=27%, signal=113%
REACTOME_DNA_REPAIR	280	-0.53534746	-2.8951936	0.0	0	0	4888	tags=51%, list=23%, signal=66%
REACTOME_PROCESSING_OF_CAPPED_INTRON_CONTAINING_PRE_MRNA	237	-0.5996873	-2.8903039	0.0	0	0	6204	tags=70%, list=30%, signal=98%
REACTOME_MITOTIC_METAPHASE_AND_ANAPHASE	229	-0.5861303	-2.8776345	0.0	0	0	4520	tags=60%, list=22%, signal=75%
REACTOME_CHROMOSOME_MAINTENANCE	92	-0.6786843	-2.8770096	0.0	0	0	4243	tags=67%, list=20%, signal=84%
WP_DNA_REPLICATION	42	-0.77149445	-2.8675685	0.0	0	0	2025	tags=69%, list=10%, signal=76%
REACTOME_SWITCHING_OF_ORIGINS_TO_A_POST_REPLICATIVE_STATE	86	-0.6856725	-2.8600132	0.0	0	0	4789	tags=76%, list=23%, signal=98%
REACTOME_RRNA_MODIFICATION_IN_THE_NUCLEUS_AND_CYTOSOL	59	-0.702139	-2.8597956	0.0	0	0	3123	tags=73%, list=15%, signal=85%
WP_RETINOBLASTOMA_GENE_IN_CANCER	86	-0.6710005	-2.8566637	0.0	0	0	3207	tags=60%, list=15%, signal=71%
REACTOME_ACTIVATION_OF_THE_PRE_REPLICATIVE_COMPLEX	33	-0.8069963	-2.8287327	0.0	0	0	1901	tags=73%, list=9%, signal=80%
REACTOME_HDR_THROUGH_HOMOLOGOUS_RECOMBINATION_HRR	66	-0.7033664	-2.8275447	0.0	0	0	4567	tags=74%, list=22%, signal=95%
REACTOME_ACTIVATION_OF_ATR_IN_RESPONSE_TO_REPLICATION_STRESS	36	-0.8072272	-2.8273752	0.0	0	0	3231	tags=83%, list=15%, signal=98%
REACTOME_APC_C_CDH1_MEDIATED_DEGRADATION_OF_CDC20_AND_OTHER_APC_C_CDH1_TARGETED_PROTEINS_IN_LATE_MITOSIS_EARLY_G1	70	-0.67437506	-2.8252409	0.0	0	0	4261	tags=70%, list=20%, signal=88%
WP_DNA_REPAIR_PATHWAYS_FULL_NETWORK	115	-0.62640435	-2.8226252	0.0	0	0	4406	tags=59%, list=21%, signal=74%
REACTOME_HOMOLOGY_DIRECTED_REPAIR	103	-0.6496425	-2.8212073	0.0	0	0	4567	tags=60%, list=22%, signal=77%
REACTOME_APC_C_MEDIATED_DEGRADATION_OF_CELL_CYCLE_PROTEINS	84	-0.6612301	-2.8169122	0.0	0	0	4998	tags=74%, list=24%, signal=97%
REACTOME_TRNA_PROCESSING_IN_THE_NUCLEUS	57	-0.7117546	-2.8153424	0.0	0	0	3934	tags=74%, list=19%, signal=91%
KEGG_DNA_REPLICATION	36	-0.78647935	-2.7972088	0.0	0	0	2815	tags=81%, list=13%, signal=93%
REACTOME_SEPARATION_OF_SISTER_CHROMATIDS	185	-0.5820685	-2.7940297	0.0	0	0	4520	tags=62%, list=22%, signal=79%
WP_DNA_IRDAMAGE_AND_CELLULAR_RESPONSE_VIA_ATR	77	-0.67573357	-2.784098	0.0	0	0	3774	tags=57%, list=18%, signal=69%
REACTOME_CDT1_ASSOCIATION_WITH_THE_CDC6_ORC_ORIGIN_COMPLEX	55	-0.71711564	-2.7648804	0.0	0	0	4663	tags=80%, list=22%, signal=103%
REACTOME_MITOTIC_SPINDLE_CHECKPOINT	110	-0.62249786	-2.7607028	0.0	0	0	5377	tags=72%, list=26%, signal=96%
REACTOME_DNA_STRAND_ELONGATION	32	-0.81471956	-2.7575905	0.0	0	0	2025	tags=81%, list=10%, signal=90%
KEGG_PROTEASOME	39	-0.7433039	-2.7373848	0.0	0	0	4483	tags=85%, list=21%, signal=107%
REACTOME_TELOMERE_MAINTENANCE	65	-0.67672837	-2.734237	0.0	0	0	3592	tags=63%, list=17%, signal=76%
REACTOME_SUMOYLATION_OF_DNA_REPLICATION_PROTEINS	45	-0.71248865	-2.7342014	0.0	0	0	3920	tags=69%, list=19%, signal=85%
REACTOME_EXTENSION_OF_TELOMERES	51	-0.7071874	-2.7269697	0.0	0	0	4068	tags=71%, list=19%, signal=87%
REACTOME_HOMOLOGOUS_DNA_PAIRING_AND_STRAND_EXCHANGE	41	-0.74199003	-2.7255526	0.0	0	0	4766	tags=85%, list=23%, signal=110%
REACTOME_SNRNP_ASSEMBLY	53	-0.6918564	-2.7167852	0.0	0	0	3635	tags=68%, list=17%, signal=82%
REACTOME_MITOCHONDRIAL_PROTEIN_IMPORT	62	-0.6543482	-2.7020745	0.0	0	0	4283	tags=66%, list=20%, signal=83%
REACTOME_AUF1_HNRNP_D0_BINDS_AND_DESTABILIZES_MRNA	51	-0.70925945	-2.6917403	0.0	0	0	3540	tags=71%, list=17%, signal=85%
KEGG_SPLICEOSOME	125	-0.5833429	-2.6879022	0.0	0	0	6181	tags=74%, list=30%, signal=105%
REACTOME_TRNA_MODIFICATION_IN_THE_NUCLEUS_AND_CYTOSOL	42	-0.6918823	-2.6692216	0.0	0	0	3502	tags=62%, list=17%, signal=74%
REACTOME_CYCLIN_A_CDK2_ASSOCIATED_EVENTS_AT_S_PHASE_ENTRY	82	-0.614245	-2.6595612	0.0	0	0	3540	tags=57%, list=17%, signal=69%
REACTOME_STABILIZATION_OF_P53	53	-0.6618579	-2.6593146	0.0	0	0	3540	tags=62%, list=17%, signal=75%
WP_PYRIMIDINE_METABOLISM	82	-0.5944438	-2.654015	0.0	0	0	3398	tags=51%, list=16%, signal=61%
REACTOME_RESPIRATORY_ELECTRON_TRANSPORT	92	-0.61190087	-2.6452484	0.0	0	0	6098	tags=66%, list=29%, signal=93%
REACTOME_DEGRADATION_OF_GLI1_BY_THE_PROTEASOME	54	-0.66458565	-2.627533	0.0	0	0	4657	tags=69%, list=22%, signal=88%
PID_PLK1_PATHWAY	44	-0.7082495	-2.6273043	0.0	0	0	3005	tags=59%, list=14%, signal=69%
REACTOME_RESPIRATORY_ELECTRON_TRANSPORT_ATP_SYNTHESIS_BY_CHEMIOSMOTIC_COUPLING_AND_HEAT_PRODUCTION_BY_UNCOUPLING_PROTEINS	112	-0.60994214	-2.6244075	0.0	0	0	6166	tags=69%, list=29%, signal=97%
REACTOME_TRANSPORT_OF_MATURE_TRANSCRIPT_TO_CYTOPLASM	80	-0.606239	-2.6043494	0.0	0	0	6343	tags=76%, list=30%, signal=109%
REACTOME_DEGRADATION_OF_AXIN	50	-0.6656851	-2.6031291	0.0	0	0	3540	tags=64%, list=17%, signal=77%
REACTOME_METABOLISM_OF_POLYAMINES	55	-0.6477557	-2.600321	0.0	0	0	3540	tags=67%, list=17%, signal=81%
REACTOME_G2_M_DNA_DAMAGE_CHECKPOINT	60	-0.6265662	-2.5864267	0.0	0	0	5376	tags=62%, list=26%, signal=83%
REACTOME_RESOLUTION_OF_D_LOOP_STRUCTURES	34	-0.7384062	-2.5792837	0.0	0	0	4567	tags=79%, list=22%, signal=101%
REACTOME_HOST_INTERACTIONS_OF_HIV_FACTORS	123	-0.5643368	-2.5737956	0.0	0	0	4483	tags=59%, list=21%, signal=74%
REACTOME_DNA_DOUBLE_STRAND_BREAK_REPAIR	131	-0.5734736	-2.5709774	0.0	0	0	4567	tags=54%, list=22%, signal=69%
REACTOME_PROCESSING_OF_DNA_DOUBLE_STRAND_BREAK_ENDS	63	-0.6196932	-2.558729	0.0	0	0	4816	tags=57%, list=23%, signal=74%
REACTOME_TELOMERE_C_STRAND_LAGGING_STRAND_SYNTHESIS	34	-0.71420634	-2.549848	0.0	0	0	3592	tags=65%, list=17%, signal=78%
REACTOME_VIRAL_MESSENGER_RNA_SYNTHESIS	43	-0.67766744	-2.5459158	0.0	0	0	4456	tags=74%, list=21%, signal=94%
REACTOME_RESOLUTION_OF_SISTER_CHROMATID_COHESION	124	-0.5609654	-2.5434785	0.0	0	0	3012	tags=49%, list=14%, signal=57%
REACTOME_G1_S_DNA_DAMAGE_CHECKPOINTS	64	-0.6290148	-2.541416	0.0	0	0	3540	tags=61%, list=17%, signal=73%
REACTOME_TRANSPORT_OF_MATURE_MRNAS_DERIVED_FROM_INTRONLESS_TRANSCRIPTS	42	-0.6851378	-2.5399282	0.0	0	0	3635	tags=67%, list=17%, signal=81%
REACTOME_COMPLEX_I_BIOGENESIS	51	-0.64885396	-2.5373363	0.0	0	0	6098	tags=75%, list=29%, signal=105%
REACTOME_DEGRADATION_OF_DVL	52	-0.65105057	-2.5371222	0.0	0	0	4624	tags=71%, list=22%, signal=91%
REACTOME_NEGATIVE_REGULATION_OF_NOTCH4_SIGNALING	51	-0.6620743	-2.5365005	0.0	0	0	4657	tags=71%, list=22%, signal=91%
REACTOME_MRNA_SPLICING_MINOR_PATHWAY	52	-0.6497771	-2.534672	0.0	0	0	5722	tags=73%, list=27%, signal=100%
REACTOME_MITOTIC_PROMETAPHASE	200	-0.50448835	-2.5310736	0.0	0	0	3510	tags=43%, list=17%, signal=51%
REACTOME_REGULATION_OF_MRNA_STABILITY_BY_PROTEINS_THAT_BIND_AU_RICH_ELEMENTS	83	-0.5959224	-2.5276463	0.0	0	0	5259	tags=70%, list=25%, signal=93%
REACTOME_INTERACTIONS_OF_REV_WITH_HOST_CELLULAR_PROTEINS	36	-0.69710547	-2.5257053	0.0	0	0	5152	tags=83%, list=25%, signal=110%
REACTOME_HDR_THROUGH_SINGLE_STRAND_ANNEALING_SSA	36	-0.7090488	-2.5240433	0.0	0	0	4766	tags=78%, list=23%, signal=101%
REACTOME_REGULATION_OF_RUNX2_EXPRESSION_AND_ACTIVITY	68	-0.6153259	-2.518282	0.0	0	0	3540	tags=57%, list=17%, signal=69%
REACTOME_SCF_SKP2_MEDIATED_DEGRADATION_OF_P27_P21	58	-0.6432955	-2.5116744	0.0	0	0	3540	tags=67%, list=17%, signal=81%
REACTOME_NUCLEOTIDE_EXCISION_REPAIR	107	-0.5512122	-2.5081525	0.0	0	0	4455	tags=49%, list=21%, signal=61%
WP_NUCLEOTIDE_EXCISION_REPAIR_IN_XERODERMA_PIGMENTOSUM	55	-0.6346186	-2.4913352	0.0	0	0	4333	tags=55%, list=21%, signal=69%
REACTOME_TRANSPORT_OF_THE_SLBP_DEPENDANT_MATURE_MRNA	35	-0.6984345	-2.4896517	0.0	0	0	3635	tags=71%, list=17%, signal=86%
WP_ELECTRON_TRANSPORT_CHAIN_OXPHOS_SYSTEM_IN_MITOCHONDRIA	88	-0.5650894	-2.4877837	0.0	0	0	6166	tags=64%, list=29%, signal=90%
REACTOME_G0_AND_EARLY_G1	26	-0.7271238	-2.4848664	0.0	0	0	3125	tags=62%, list=15%, signal=72%
WP_MITOCHONDRIAL_COMPLEX_I_ASSEMBLY_MODEL_OXPHOS_SYSTEM	50	-0.6386034	-2.4823594	0.0	0	0	6098	tags=72%, list=29%, signal=101%
REACTOME_E2F_MEDIATED_REGULATION_OF_DNA_REPLICATION	22	-0.7941091	-2.4781058	0.0	0	0	3231	tags=68%, list=15%, signal=81%
PID_FANCONI_PATHWAY	44	-0.66574055	-2.4769032	0.0	0	0	5013	tags=80%, list=24%, signal=104%
REACTOME_HIV_INFECTION	218	-0.4822103	-2.4712262	0.0	0	0	5759	tags=61%, list=28%, signal=83%
KEGG_PYRIMIDINE_METABOLISM	94	-0.5589701	-2.4695554	0.0	0	0	3398	tags=47%, list=16%, signal=56%
REACTOME_G1_S_SPECIFIC_TRANSCRIPTION	28	-0.7328703	-2.468445	0.0	0	0	3398	tags=71%, list=16%, signal=85%
REACTOME_NUCLEAR_PORE_COMPLEX_NPC_DISASSEMBLY	35	-0.68291265	-2.4638846	0.0	0	0	3635	tags=69%, list=17%, signal=83%
REACTOME_TRANSCRIPTIONAL_REGULATION_BY_SMALL_RNAS	46	-0.6651795	-2.4560738	0.0	0	0	5152	tags=78%, list=25%, signal=104%
WP_DNA_MISMATCH_REPAIR	23	-0.7374395	-2.4466732	0.0	0	0	4313	tags=87%, list=21%, signal=109%
REACTOME_THE_ROLE_OF_GTSE1_IN_G2_M_PROGRESSION_AFTER_G2_CHECKPOINT	74	-0.5709128	-2.439771	0.0	0	0	3757	tags=64%, list=18%, signal=77%
WP_CELL_CYCLE	118	-0.5443774	-2.437241	0.0	0	0	3343	tags=44%, list=16%, signal=52%
REACTOME_BASE_EXCISION_REPAIR	44	-0.6465622	-2.4330924	0.0	0	0	4313	tags=64%, list=21%, signal=80%
REACTOME_GLOBAL_GENOME_NUCLEOTIDE_EXCISION_REPAIR_GG_NER	81	-0.5722642	-2.426269	0.0	0	0	4333	tags=49%, list=21%, signal=62%
REACTOME_DISEASES_OF_DNA_REPAIR	34	-0.705738	-2.4246223	0.0	0	0	4567	tags=79%, list=22%, signal=101%
REACTOME_SUMOYLATION_OF_SUMOYLATION_PROTEINS	34	-0.6755684	-2.4223535	0.0	0	0	3635	tags=62%, list=17%, signal=75%
PID_BARD1_PATHWAY	29	-0.7097028	-2.416994	0.0	0	0	5184	tags=79%, list=25%, signal=105%
KEGG_CELL_CYCLE	122	-0.54820555	-2.409046	0.0	0	0	3343	tags=44%, list=16%, signal=52%
REACTOME_RESOLUTION_OF_D_LOOP_STRUCTURES_THROUGH_SYNTHESIS_DEPENDENT_STRAND_ANNEALING_SDSA	26	-0.7464376	-2.40193	0.0	0	0	3774	tags=77%, list=18%, signal=94%
REACTOME_TRANSCRIPTION_COUPLED_NUCLEOTIDE_EXCISION_REPAIR_TC_NER	75	-0.59752923	-2.4017613	0.0	0	0	4455	tags=56%, list=21%, signal=71%
REACTOME_REGULATION_OF_HSF1_MEDIATED_HEAT_SHOCK_RESPONSE	79	-0.558808	-2.3977742	0.0	2.3705621e-05	0.001	4456	tags=57%, list=21%, signal=72%
REACTOME_MITOTIC_G2_G2_M_PHASES	191	-0.49665093	-2.3977172	0.0	2.3479854e-05	0.001	3590	tags=43%, list=17%, signal=52%
REACTOME_DECTIN_1_MEDIATED_NONCANONICAL_NF_KB_SIGNALING	57	-0.5993713	-2.3898757	0.0	2.3258346e-05	0.001	3540	tags=58%, list=17%, signal=69%
REACTOME_POSTMITOTIC_NUCLEAR_PORE_COMPLEX_NPC_REFORMATION	27	-0.70889103	-2.3844519	0.0	2.3040977e-05	0.001	4072	tags=74%, list=19%, signal=92%
REACTOME_DUAL_INCISION_IN_TC_NER	63	-0.59842366	-2.3843927	0.0	2.2827635e-05	0.001	4455	tags=56%, list=21%, signal=70%
REACTOME_POLYMERASE_SWITCHING_ON_THE_C_STRAND_OF_THE_TELOMERE	26	-0.7228613	-2.3840964	0.0	2.2618207e-05	0.001	2448	tags=54%, list=12%, signal=61%
REACTOME_TRNA_AMINOACYLATION	23	-0.7445613	-2.3815472	0.0	2.2412587e-05	0.001	3855	tags=70%, list=18%, signal=85%
REACTOME_NUCLEAR_IMPORT_OF_REV_PROTEIN	33	-0.6910832	-2.3800354	0.0	2.2210672e-05	0.001	3635	tags=70%, list=17%, signal=84%
REACTOME_RESOLUTION_OF_ABASIC_SITES_AP_SITES	37	-0.6577246	-2.3799827	0.0	2.2012362e-05	0.001	4826	tags=76%, list=23%, signal=98%
REACTOME_LAGGING_STRAND_SYNTHESIS	20	-0.7663429	-2.3760462	0.0	2.1817563e-05	0.001	3207	tags=85%, list=15%, signal=100%
REACTOME_EXPORT_OF_VIRAL_RIBONUCLEOPROTEINS_FROM_NUCLEUS	32	-0.6954458	-2.3650653	0.0	2.1626181e-05	0.001	4456	tags=78%, list=21%, signal=99%
REACTOME_DEPOSITION_OF_NEW_CENPA_CONTAINING_NUCLEOSOMES_AT_THE_CENTROMERE	28	-0.7126146	-2.3576665	0.0	2.1438127e-05	0.001	2344	tags=57%, list=11%, signal=64%
BIOCARTA_MCM_PATHWAY	18	-0.78984064	-2.3571384	0.0	2.1253316e-05	0.001	1263	tags=67%, list=6%, signal=71%
REACTOME_REGULATION_OF_RUNX3_EXPRESSION_AND_ACTIVITY	53	-0.6166846	-2.3566594	0.0	2.1071664e-05	0.001	3540	tags=60%, list=17%, signal=72%
REACTOME_RESOLUTION_OF_AP_SITES_VIA_THE_MULTIPLE_NUCLEOTIDE_PATCH_REPLACEMENT_PATHWAY	24	-0.71682525	-2.3477545	0.0	2.089309e-05	0.001	3207	tags=71%, list=15%, signal=84%
REACTOME_ASYMMETRIC_LOCALIZATION_OF_PCP_PROTEINS	60	-0.5813304	-2.345573	0.0	2.0717518e-05	0.001	3540	tags=55%, list=17%, signal=66%
REACTOME_RRNA_PROCESSING	198	-0.5357292	-2.344856	0.0	2.0544872e-05	0.001	3223	tags=41%, list=15%, signal=48%
WP_BASE_EXCISION_REPAIR	31	-0.6594614	-2.3441355	0.0	2.037508e-05	0.001	4826	tags=77%, list=23%, signal=100%
WP_EUKARYOTIC_TRANSCRIPTION_INITIATION	40	-0.628217	-2.3285248	0.0	2.0208072e-05	0.001	4455	tags=63%, list=21%, signal=79%
REACTOME_FANCONI_ANEMIA_PATHWAY	39	-0.6460875	-2.3235207	0.0	2.0043777e-05	0.001	5013	tags=72%, list=24%, signal=94%
KEGG_HOMOLOGOUS_RECOMBINATION	28	-0.6873348	-2.321804	0.0	1.9882134e-05	0.001	3998	tags=68%, list=19%, signal=84%
REACTOME_DEFECTIVE_CFTR_CAUSES_CYSTIC_FIBROSIS	57	-0.5714226	-2.3165498	0.0	1.9723077e-05	0.001	3540	tags=58%, list=17%, signal=69%
REACTOME_INTERACTIONS_OF_VPR_WITH_HOST_CELLULAR_PROTEINS	36	-0.66621655	-2.3113267	0.0	1.9566545e-05	0.001	5196	tags=81%, list=25%, signal=107%
KEGG_NUCLEOTIDE_EXCISION_REPAIR	42	-0.6139014	-2.3083243	0.0	1.9412479e-05	0.001	4333	tags=57%, list=21%, signal=72%
WP_NUCLEOTIDE_EXCISION_REPAIR	41	-0.6223458	-2.3039253	0.0	1.9260819e-05	0.001	4333	tags=59%, list=21%, signal=74%
REACTOME_RNA_POLYMERASE_II_TRANSCRIPTION_TERMINATION	65	-0.5780153	-2.3017101	0.0	1.9111509e-05	0.001	6343	tags=69%, list=30%, signal=99%
KEGG_RNA_POLYMERASE	28	-0.69444185	-2.300978	0.0	1.8964498e-05	0.001	4455	tags=71%, list=21%, signal=91%
PID_AURORA_B_PATHWAY	38	-0.61230576	-2.294333	0.0	3.4158693e-05	0.002	3005	tags=53%, list=14%, signal=61%
REACTOME_RHO_GTPASES_ACTIVATE_FORMINS	137	-0.50428987	-2.2918248	0.0	3.3899916e-05	0.002	3012	tags=42%, list=14%, signal=48%
REACTOME_CELLULAR_RESPONSE_TO_HEAT_STRESS	98	-0.50479186	-2.2892108	0.0	3.364503e-05	0.002	4456	tags=51%, list=21%, signal=65%
REACTOME_SUMOYLATION_OF_UBIQUITINYLATION_PROTEINS	38	-0.6211457	-2.2872107	0.0	3.3393946e-05	0.002	4006	tags=58%, list=19%, signal=71%
REACTOME_REGULATION_OF_PTEN_STABILITY_AND_ACTIVITY	64	-0.56286615	-2.2809076	0.0	3.3146585e-05	0.002	4483	tags=59%, list=21%, signal=75%
KEGG_MISMATCH_REPAIR	23	-0.68883485	-2.2746837	0.0	4.8719085e-05	0.003	3998	tags=74%, list=19%, signal=91%
REACTOME_NUCLEAR_ENVELOPE_BREAKDOWN	52	-0.5950506	-2.2683918	0.0	4.8363472e-05	0.003	3635	tags=58%, list=17%, signal=70%
REACTOME_DUAL_INCISION_IN_GG_NER	39	-0.61938983	-2.2601907	0.0	6.354789e-05	0.004	4333	tags=62%, list=21%, signal=77%
REACTOME_UCH_PROTEINASES	80	-0.5221198	-2.2452536	0.0	9.360413e-05	0.006	4261	tags=56%, list=20%, signal=70%
REACTOME_GAP_FILLING_DNA_REPAIR_SYNTHESIS_AND_LIGATION_IN_GG_NER	25	-0.6930761	-2.2444177	0.0	9.293553e-05	0.006	3207	tags=64%, list=15%, signal=75%
REACTOME_PCNA_DEPENDENT_LONG_PATCH_BASE_EXCISION_REPAIR	21	-0.7151964	-2.2431438	0.0	0.000109051696	0.007	3207	tags=71%, list=15%, signal=84%
REACTOME_RECOGNITION_OF_DNA_DAMAGE_BY_PCNA_CONTAINING_REPLICATION_COMPLEX	29	-0.66187155	-2.2310798	0.0	0.000108283726	0.007	3207	tags=59%, list=15%, signal=69%
REACTOME_TRANSLATION	269	-0.4462472	-2.2237594	0.0	0.00012217525	0.008	5263	tags=46%, list=25%, signal=61%
REACTOME_TRANSLESION_SYNTHESIS_BY_Y_FAMILY_DNA_POLYMERASES_BYPASSES_LESIONS_ON_DNA_TEMPLATE	39	-0.59681004	-2.2224998	0.0	0.00013641625	0.009	4313	tags=56%, list=21%, signal=71%
REACTOME_DNA_DAMAGE_BYPASS	47	-0.5865146	-2.2187753	0.0	0.0001501621	0.01	3353	tags=47%, list=16%, signal=56%
REACTOME_DOWNSTREAM_SIGNALING_EVENTS_OF_B_CELL_RECEPTOR_BCR	77	-0.5163925	-2.204419	0.0	0.0001796105	0.012	4759	tags=52%, list=23%, signal=67%
REACTOME_HIV_TRANSCRIPTION_INITIATION	45	-0.5841763	-2.2042873	0.0	0.00017838865	0.012	5930	tags=69%, list=28%, signal=96%
REACTOME_REGULATION_OF_HMOX1_EXPRESSION_AND_ACTIVITY	60	-0.55298674	-2.2039287	0.0	0.00017718333	0.012	4657	tags=63%, list=22%, signal=81%
REACTOME_RUNX1_REGULATES_TRANSCRIPTION_OF_GENES_INVOLVED_IN_DIFFERENTIATION_OF_HSCS	65	-0.5450904	-2.2029428	0.0	0.00017599418	0.012	3540	tags=55%, list=17%, signal=66%
WP_PURINE_METABOLISM_AND_RELATED_DISORDERS	20	-0.7158279	-2.2014563	0.0	0.00017482089	0.012	2803	tags=50%, list=13%, signal=58%
REACTOME_PROCESSING_OF_CAPPED_INTRONLESS_PRE_MRNA	28	-0.6488975	-2.1950152	0.0	0.00020333027	0.014	5570	tags=71%, list=27%, signal=97%
REACTOME_TRANSLESION_SYNTHESIS_BY_POLH	19	-0.71653676	-2.1892724	0.0	0.00021761148	0.015	3998	tags=68%, list=19%, signal=85%
WP_G1_TO_S_CELL_CYCLE_CONTROL	64	-0.5532701	-2.1870139	0.0	0.000232119	0.016	2321	tags=44%, list=11%, signal=49%
REACTOME_CYCLIN_A_B1_B2_ASSOCIATED_EVENTS_DURING_G2_M_TRANSITION	25	-0.6640052	-2.1861727	0.0	0.00023061172	0.016	2960	tags=56%, list=14%, signal=65%
REACTOME_HIV_LIFE_CYCLE	143	-0.46181378	-2.1853735	0.0	0.00024378876	0.017	5725	tags=59%, list=27%, signal=80%
REACTOME_TRANSCRIPTION_OF_E2F_TARGETS_UNDER_NEGATIVE_CONTROL_BY_DREAM_COMPLEX	18	-0.7279907	-2.18518	0.0	0.00024222601	0.017	3125	tags=56%, list=15%, signal=65%
REACTOME_REGULATION_OF_GLUCOKINASE_BY_GLUCOKINASE_REGULATORY_PROTEIN	31	-0.6412754	-2.1754196	0.0	0.00026944425	0.019	3635	tags=68%, list=17%, signal=82%
KEGG_AMINOACYL_TRNA_BIOSYNTHESIS	21	-0.69627476	-2.174066	0.0	0.0002677389	0.019	4315	tags=62%, list=21%, signal=78%
REACTOME_MITOTIC_PROPHASE	80	-0.53118944	-2.1596546	0.0	0.00029439977	0.021	3119	tags=43%, list=15%, signal=50%
REACTOME_REGULATION_OF_TP53_ACTIVITY_THROUGH_PHOSPHORYLATION	89	-0.4939488	-2.1588848	0.0	0.00029255977	0.021	5184	tags=61%, list=25%, signal=80%
REACTOME_SUMOYLATION_OF_DNA_DAMAGE_RESPONSE_AND_REPAIR_PROTEINS	75	-0.52032703	-2.1566255	0.0	0.00031791758	0.023	5305	tags=52%, list=25%, signal=69%
REACTOME_MITOCHONDRIAL_TRNA_AMINOACYLATION	17	-0.73648953	-2.156205	0.0	0.00031595514	0.023	3855	tags=65%, list=18%, signal=79%
REACTOME_RNA_POLYMERASE_III_TRANSCRIPTION_INITIATION_FROM_TYPE_1_PROMOTER	28	-0.64806044	-2.150722	0.0	0.00036725966	0.027	5649	tags=82%, list=27%, signal=112%
BIOCARTA_ATRBRCA_PATHWAY	21	-0.6989184	-2.1491737	0.0	0.00036502027	0.027	3774	tags=62%, list=18%, signal=75%
REACTOME_DEGRADATION_OF_BETA_CATENIN_BY_THE_DESTRUCTION_COMPLEX	78	-0.50045204	-2.147081	0.0	0.0004028405	0.03	3540	tags=46%, list=17%, signal=55%
REACTOME_SUMOYLATION_OF_RNA_BINDING_PROTEINS	46	-0.55978054	-2.141987	0.0	0.00043890253	0.033	3635	tags=48%, list=17%, signal=58%
REACTOME_MEIOTIC_RECOMBINATION	24	-0.67309105	-2.1401916	0.004901961	0.0004621777	0.035	3998	tags=71%, list=19%, signal=87%
REACTOME_HEDGEHOG_LIGAND_BIOGENESIS	61	-0.5102534	-2.1332042	0.0	0.00049840775	0.037	3540	tags=56%, list=17%, signal=67%
REACTOME_FORMATION_OF_TC_NER_PRE_INCISION_COMPLEX	50	-0.5434936	-2.1319172	0.0	0.0005079765	0.038	4455	tags=48%, list=21%, signal=61%
WP_GASTRIC_CANCER_NETWORK_1	27	-0.62637216	-2.130408	0.0	0.0005049884	0.038	3138	tags=56%, list=15%, signal=65%
REACTOME_RNA_POLYMERASE_I_TRANSCRIPTION_INITIATION	42	-0.5618274	-2.1302922	0.0	0.00050203525	0.038	6226	tags=71%, list=30%, signal=101%
REACTOME_POLO_LIKE_KINASE_MEDIATED_EVENTS	15	-0.76230747	-2.1286187	0.0	0.00049911643	0.038	3125	tags=73%, list=15%, signal=86%
REACTOME_TELOMERE_EXTENSION_BY_TELOMERASE	23	-0.66609377	-2.1267798	0.0	0.0005212277	0.04	4068	tags=61%, list=19%, signal=75%
REACTOME_ANTIVIRAL_MECHANISM_BY_IFN_STIMULATED_GENES	80	-0.48777846	-2.1259217	0.0	0.0005182322	0.04	5786	tags=63%, list=28%, signal=86%
REACTOME_INITIATION_OF_NUCLEAR_ENVELOPE_NE_REFORMATION	19	-0.69262135	-2.1239789	0.0	0.0005400202	0.042	2887	tags=53%, list=14%, signal=61%
REACTOME_RMTS_METHYLATE_HISTONE_ARGININES	30	-0.615921	-2.1189163	0.0	0.0005508	0.043	5334	tags=60%, list=25%, signal=80%
REACTOME_FCERI_MEDIATED_NF_KB_ACTIVATION	76	-0.5109802	-2.1182394	0.0	0.0005613027	0.044	3749	tags=46%, list=18%, signal=56%
WP_MRNA_PROCESSING	128	-0.47287098	-2.112724	0.0	0.0005978499	0.047	6187	tags=66%, list=30%, signal=93%
KEGG_BASE_EXCISION_REPAIR	33	-0.6016267	-2.110226	0.0	0.0006196708	0.049	2882	tags=55%, list=14%, signal=63%
REACTOME_B_WICH_COMPLEX_POSITIVELY_REGULATES_RRNA_EXPRESSION	28	-0.60617155	-2.1061506	0.0	0.00062753324	0.05	3899	tags=54%, list=19%, signal=66%
REACTOME_PROCESSIVE_SYNTHESIS_ON_THE_LAGGING_STRAND	15	-0.744234	-2.1053143	0.0	0.0006240662	0.05	3207	tags=87%, list=15%, signal=102%
WP_DNA_IRDOUBLE_STRAND_BREAKS_AND_CELLULAR_RESPONSE_VIA_ATM	52	-0.5384275	-2.1018395	0.0	0.0006685204	0.054	5598	tags=58%, list=27%, signal=79%
REACTOME_PROTEIN_LOCALIZATION	154	-0.45394647	-2.099372	0.0	0.00067678135	0.055	4987	tags=46%, list=24%, signal=60%
REACTOME_CRISTAE_FORMATION	26	-0.65286416	-2.0947912	0.0	0.00070873724	0.058	6166	tags=81%, list=29%, signal=114%
REACTOME_NUCLEAR_ENVELOPE_NE_REASSEMBLY	74	-0.5065187	-2.0900137	0.0	0.00076367374	0.063	2887	tags=43%, list=14%, signal=50%
REACTOME_HIV_TRANSCRIPTION_ELONGATION	41	-0.55927056	-2.08993	0.0	0.000759568	0.063	5826	tags=61%, list=28%, signal=84%
REACTOME_NS1_MEDIATED_EFFECTS_ON_HOST_PATHWAYS	40	-0.5870303	-2.085945	0.0	0.0008036279	0.067	3943	tags=68%, list=19%, signal=83%
REACTOME_FORMATION_OF_THE_EARLY_ELONGATION_COMPLEX	32	-0.6003613	-2.0826604	0.0	0.00084692583	0.071	4455	tags=56%, list=21%, signal=71%
REACTOME_RNA_POLYMERASE_III_CHAIN_ELONGATION	18	-0.6977172	-2.0716543	0.0	0.0009259841	0.078	4207	tags=78%, list=20%, signal=97%
REACTOME_RNA_POLYMERASE_III_TRANSCRIPTION_TERMINATION	23	-0.6304745	-2.060292	0.0	0.0010143858	0.086	4207	tags=65%, list=20%, signal=82%
REACTOME_MRNA_DECAY_BY_3_TO_5_EXORIBONUCLEASE	15	-0.69655156	-2.0595512	0.0	0.001009075	0.086	4916	tags=73%, list=24%, signal=96%
REACTOME_TRANSCRIPTION_OF_E2F_TARGETS_UNDER_NEGATIVE_CONTROL_BY_P107_RBL1_AND_P130_RBL2_IN_COMPLEX_WITH_HDAC1	15	-0.71206135	-2.0570652	0.0	0.0010261859	0.088	3125	tags=60%, list=15%, signal=70%
REACTOME_REGULATION_OF_RAS_BY_GAPS	63	-0.5142046	-2.0507157	0.0	0.0010779168	0.093	3540	tags=51%, list=17%, signal=61%
WP_MITOCHONDRIAL_GENE_EXPRESSION	19	-0.67903876	-2.0450983	0.0	0.001153587	0.099	4514	tags=53%, list=22%, signal=67%
REACTOME_ABC_FAMILY_PROTEINS_MEDIATED_TRANSPORT	98	-0.4704463	-2.0393193	0.0	0.0012618225	0.108	5145	tags=56%, list=25%, signal=74%
REACTOME_TERMINATION_OF_TRANSLESION_DNA_SYNTHESIS	32	-0.5912569	-2.0377579	0.0	0.0012682098	0.109	4313	tags=56%, list=21%, signal=71%
REACTOME_PROCESSIVE_SYNTHESIS_ON_THE_C_STRAND_OF_THE_TELOMERE	19	-0.6846069	-2.0369139	0.0	0.0012730702	0.11	3998	tags=68%, list=19%, signal=85%
REACTOME_RNA_POLYMERASE_I_PROMOTER_ESCAPE	27	-0.63191676	-2.0367901	0.0	0.0012666405	0.11	4333	tags=67%, list=21%, signal=84%
REACTOME_SULFUR_AMINO_ACID_METABOLISM	27	-0.60349935	-2.036726	0.0	0.0012602755	0.11	5220	tags=67%, list=25%, signal=89%
REACTOME_FORMATION_OF_ATP_BY_CHEMIOSMOTIC_COUPLING	16	-0.67911565	-2.0189152	0.0	0.0014550652	0.127	6166	tags=88%, list=29%, signal=124%
WP_MITOCHONDRIAL_COMPLEX_III_ASSEMBLY	15	-0.69972795	-2.0176115	0.0036630037	0.001491813	0.131	5866	tags=80%, list=28%, signal=111%
REACTOME_TRANSCRIPTION_OF_THE_HIV_GENOME	67	-0.5017399	-2.0156446	0.0	0.0015194719	0.134	5930	tags=58%, list=28%, signal=81%
REACTOME_RNA_POLYMERASE_I_TRANSCRIPTION_TERMINATION	27	-0.6064724	-2.0156155	0.0	0.0015119867	0.134	4333	tags=63%, list=21%, signal=79%
BIOCARTA_PROTEASOME_PATHWAY	17	-0.6759116	-2.0111244	0.0	0.0015921651	0.141	4261	tags=65%, list=20%, signal=81%
REACTOME_RNA_POLYMERASE_I_TRANSCRIPTION	45	-0.5300491	-2.004855	0.0	0.0017181073	0.149	6226	tags=69%, list=30%, signal=98%
REACTOME_ABC_TRANSPORTER_DISORDERS	74	-0.47621682	-1.9985116	0.0	0.0018587469	0.159	5302	tags=59%, list=25%, signal=79%
PID_E2F_PATHWAY	70	-0.4857756	-1.9941317	0.0	0.0019890938	0.172	2906	tags=37%, list=14%, signal=43%
REACTOME_MISMATCH_REPAIR	15	-0.7019895	-1.988582	0.0	0.0021068754	0.183	3998	tags=80%, list=19%, signal=99%
REACTOME_INHIBITION_OF_THE_PROTEOLYTIC_ACTIVITY_OF_APC_C_REQUIRED_FOR_THE_ONSET_OF_ANAPHASE_BY_MITOTIC_SPINDLE_CHECKPOINT_COMPONENTS	21	-0.6283369	-1.9863775	0.0	0.0021399988	0.187	4998	tags=71%, list=24%, signal=94%
REACTOME_HEDGEHOG_ON_STATE	81	-0.46971798	-1.9788398	0.0	0.0022564929	0.196	5788	tags=58%, list=28%, signal=80%
REACTOME_CROSS_PRESENTATION_OF_SOLUBLE_EXOGENOUS_ANTIGENS_ENDOSOMES	46	-0.5351938	-1.9684886	0.0	0.0024975904	0.217	3540	tags=70%, list=17%, signal=84%
WP_DNA_DAMAGE_RESPONSE	65	-0.48482704	-1.9606535	0.0	0.0026878144	0.234	3312	tags=40%, list=16%, signal=47%
REACTOME_APC_CDC20_MEDIATED_DEGRADATION_OF_NEK2A	26	-0.5815659	-1.955575	0.0	0.00284393	0.247	4998	tags=65%, list=24%, signal=86%
BIOCARTA_CELLCYCLE_PATHWAY	23	-0.6139766	-1.9536617	0.0	0.0028834997	0.251	2906	tags=52%, list=14%, signal=61%
WP_REGULATION_OF_SISTER_CHROMATID_SEPARATION_AT_THE_METAPHASEANAPHASE_TRANSITION	15	-0.6891031	-1.9531605	0.0036764706	0.0028799274	0.252	6380	tags=93%, list=31%, signal=134%
PID_ATM_PATHWAY	31	-0.5651103	-1.9519105	0.0	0.0029061108	0.256	5428	tags=55%, list=26%, signal=74%
REACTOME_TRANSLESION_SYNTHESIS_BY_POLK	17	-0.6699094	-1.9516363	0.0	0.0029026978	0.256	3998	tags=53%, list=19%, signal=65%
REACTOME_POSITIVE_EPIGENETIC_REGULATION_OF_RRNA_EXPRESSION	42	-0.53471905	-1.9444029	0.0	0.0031430323	0.276	3935	tags=45%, list=19%, signal=56%
WP_PYRIMIDINE_METABOLISM_AND_RELATED_DISEASES	15	-0.6733723	-1.9417416	0.003968254	0.0032413257	0.285	2505	tags=47%, list=12%, signal=53%
REACTOME_NEGATIVE_EPIGENETIC_REGULATION_OF_RRNA_EXPRESSION	44	-0.51548344	-1.9380323	0.0	0.00332761	0.29	4465	tags=50%, list=21%, signal=63%
REACTOME_KSRP_KHSRP_BINDS_AND_DESTABILIZES_MRNA	17	-0.6512394	-1.9369683	0.0	0.0033125528	0.29	5167	tags=71%, list=25%, signal=94%
REACTOME_PHOSPHORYLATION_OF_THE_APC_C	20	-0.62466735	-1.9338266	0.0	0.0034093393	0.297	4998	tags=70%, list=24%, signal=92%
REACTOME_MRNA_CAPPING	28	-0.56862885	-1.9301558	0.0	0.0035836739	0.313	4455	tags=64%, list=21%, signal=82%
WP_NUCLEOTIDE_METABOLISM	18	-0.6318486	-1.9278157	0.0	0.0036503645	0.317	2664	tags=44%, list=13%, signal=51%
WP_PROTEASOME_DEGRADATION	56	-0.48822415	-1.9266331	0.0	0.0036736461	0.321	3540	tags=55%, list=17%, signal=66%
REACTOME_SUMOYLATION_OF_CHROMATIN_ORGANIZATION_PROTEINS	55	-0.49421084	-1.9183308	0.0	0.004008959	0.344	5724	tags=58%, list=27%, signal=80%
REACTOME_PROCESSING_OF_INTRONLESS_PRE_MRNAS	19	-0.63545775	-1.9139535	0.004950495	0.004208658	0.358	6122	tags=68%, list=29%, signal=97%
REACTOME_HEDGEHOG_OFF_STATE	106	-0.42403156	-1.9089925	0.0	0.004378399	0.373	4483	tags=47%, list=21%, signal=60%
REACTOME_DISEASES_ASSOCIATED_WITH_N_GLYCOSYLATION_OF_PROTEINS	17	-0.6369125	-1.9027957	0.0	0.004621059	0.389	3585	tags=53%, list=17%, signal=64%
REACTOME_SIGNALING_BY_FGFR2_IIIA_TM	19	-0.6345028	-1.8978567	0.016736401	0.004913517	0.41	5722	tags=79%, list=27%, signal=109%
REACTOME_THE_CITRIC_ACID_TCA_CYCLE_AND_RESPIRATORY_ELECTRON_TRANSPORT	161	-0.3882205	-1.894473	0.0	0.005065302	0.423	5966	tags=58%, list=29%, signal=81%
WP_MITOCHONDRIAL_COMPLEX_IV_ASSEMBLY	31	-0.55259097	-1.8894868	0.0	0.005324501	0.442	7369	tags=74%, list=35%, signal=114%
REACTOME_TP53_REGULATES_TRANSCRIPTION_OF_GENES_INVOLVED_IN_G2_CELL_CYCLE_ARREST	17	-0.6280281	-1.8840655	0.004115226	0.0056683267	0.462	2725	tags=53%, list=13%, signal=61%
REACTOME_HCMV_LATE_EVENTS	53	-0.48711678	-1.8816763	0.0	0.0057814284	0.469	5372	tags=60%, list=26%, signal=81%
REACTOME_EPIGENETIC_REGULATION_OF_GENE_EXPRESSION	81	-0.43574885	-1.8786731	0.0	0.0059559746	0.482	4465	tags=44%, list=21%, signal=56%
REACTOME_AURKA_ACTIVATION_BY_TPX2	71	-0.45923173	-1.8781148	0.0	0.005969739	0.483	3363	tags=32%, list=16%, signal=38%
WP_NANOMATERIAL_INDUCED_APOPTOSIS	18	-0.61010545	-1.8745779	0.017167382	0.006168447	0.493	5163	tags=67%, list=25%, signal=88%
REACTOME_APC_C_CDC20_MEDIATED_DEGRADATION_OF_CYCLIN_B	24	-0.57487696	-1.8739759	0.0	0.006142529	0.493	4998	tags=63%, list=24%, signal=82%
WP_GASTRIC_CANCER_NETWORK_2	30	-0.5467782	-1.8722025	0.0	0.006174065	0.495	3138	tags=47%, list=15%, signal=55%
WP_ATM_SIGNALING_IN_DEVELOPMENT_AND_DISEASE	44	-0.508592	-1.8716735	0.0	0.006185358	0.497	4161	tags=43%, list=20%, signal=54%
REACTOME_METABOLISM_OF_FOLATE_AND_PTERINES	16	-0.6486953	-1.8702389	0.0	0.0061968854	0.498	2683	tags=56%, list=13%, signal=64%
REACTOME_CITRIC_ACID_CYCLE_TCA_CYCLE	21	-0.60003287	-1.8678324	0.004651163	0.0062732482	0.5	5569	tags=67%, list=27%, signal=91%
REACTOME_RNA_POLYMERASE_III_TRANSCRIPTION	41	-0.49718016	-1.8575269	0.0	0.0067647025	0.529	5133	tags=61%, list=25%, signal=81%
REACTOME_TRANSCRIPTIONAL_REGULATION_BY_E2F6	33	-0.535454	-1.8529391	0.0	0.0071286918	0.547	3148	tags=42%, list=15%, signal=50%
PID_AURORA_A_PATHWAY	31	-0.53229433	-1.835648	0.012121212	0.008302748	0.605	2960	tags=35%, list=14%, signal=41%
REACTOME_ABORTIVE_ELONGATION_OF_HIV_1_TRANSCRIPT_IN_THE_ABSENCE_OF_TAT	23	-0.56702244	-1.833704	0.005154639	0.008395526	0.609	5722	tags=61%, list=27%, signal=84%
REACTOME_ASSOCIATION_OF_TRIC_CCT_WITH_TARGET_PROTEINS_DURING_BIOSYNTHESIS	37	-0.52779055	-1.8271959	0.0	0.008915311	0.631	4274	tags=46%, list=20%, signal=58%
REACTOME_RNA_POLYMERASE_III_TRANSCRIPTION_INITIATION_FROM_TYPE_3_PROMOTER	28	-0.52740115	-1.8247668	0.0	0.009085981	0.634	4207	tags=57%, list=20%, signal=71%
REACTOME_FORMATION_OF_RNA_POL_II_ELONGATION_COMPLEX	56	-0.4602856	-1.8240615	0.0	0.009121251	0.636	5826	tags=54%, list=28%, signal=74%
REACTOME_DISEASES_OF_MITOTIC_CELL_CYCLE	38	-0.48438227	-1.8159786	0.0	0.00968314	0.662	4998	tags=58%, list=24%, signal=76%
PID_FOXM1_PATHWAY	38	-0.511004	-1.8052644	0.0	0.010686138	0.699	3312	tags=55%, list=16%, signal=66%
REACTOME_REGULATION_OF_PLK1_ACTIVITY_AT_G2_M_TRANSITION	86	-0.41118303	-1.7906142	0.0	0.012098708	0.732	3476	tags=30%, list=17%, signal=36%
WP_TRANSSULFURATION_AND_ONECARBON_METABOLISM	30	-0.53008765	-1.7859625	0.0	0.012473918	0.741	2849	tags=40%, list=14%, signal=46%
WP_TCA_CYCLE_AKA_KREBS_OR_CITRIC_ACID_CYCLE	17	-0.6001496	-1.7775005	0.011029412	0.013415087	0.765	4707	tags=65%, list=23%, signal=83%
REACTOME_REGULATION_OF_TP53_ACTIVITY	156	-0.3911729	-1.7762234	0.0	0.013513138	0.769	5599	tags=53%, list=27%, signal=71%
KEGG_SELENOAMINO_ACID_METABOLISM	25	-0.51450306	-1.7708802	0.005	0.014183508	0.789	3370	tags=36%, list=16%, signal=43%
KEGG_GLUTATHIONE_METABOLISM	45	-0.45509648	-1.7707638	0.0	0.014136746	0.789	1997	tags=29%, list=10%, signal=32%
REACTOME_TP53_REGULATES_TRANSCRIPTION_OF_DNA_REPAIR_GENES	60	-0.43471387	-1.768624	0.0	0.014363174	0.797	4645	tags=48%, list=22%, signal=62%
REACTOME_GENE_AND_PROTEIN_EXPRESSION_BY_JAK_STAT_SIGNALING_AFTER_INTERLEUKIN_12_STIMULATION	35	-0.48808423	-1.7593057	0.0065789474	0.015564709	0.828	5719	tags=51%, list=27%, signal=71%
WP_FLUOROPYRIMIDINE_ACTIVITY	29	-0.52673763	-1.7535281	0.0	0.016072745	0.844	3398	tags=52%, list=16%, signal=62%
REACTOME_MICRORNA_MIRNA_BIOGENESIS	24	-0.5402778	-1.7437131	0.010526316	0.017539313	0.869	4455	tags=58%, list=21%, signal=74%
REACTOME_CONVERSION_FROM_APC_C_CDC20_TO_APC_C_CDH1_IN_LATE_ANAPHASE	20	-0.576117	-1.7412798	0.009756098	0.01777304	0.876	6380	tags=75%, list=31%, signal=108%
WP_OXIDATIVE_PHOSPHORYLATION	52	-0.43358436	-1.7369559	0.0	0.018333986	0.881	6166	tags=75%, list=29%, signal=106%
REACTOME_HIV_ELONGATION_ARREST_AND_RECOVERY	32	-0.4989423	-1.7366713	0.01183432	0.018306982	0.883	4645	tags=44%, list=22%, signal=56%
REACTOME_ABERRANT_REGULATION_OF_MITOTIC_EXIT_IN_CANCER_DUE_TO_RB1_DEFECTS	20	-0.55952406	-1.7340685	0.0048076925	0.018610286	0.887	6380	tags=75%, list=31%, signal=108%
WP_GLYCOSYLATION_AND_RELATED_CONGENITAL_DEFECTS	25	-0.53229266	-1.7316686	0.01	0.018755758	0.89	3585	tags=48%, list=17%, signal=58%
REACTOME_METABOLISM_OF_COFACTORS	19	-0.5563053	-1.7254639	0.0	0.019372523	0.9	2086	tags=42%, list=10%, signal=47%
WP_MIRNA_REGULATION_OF_DNA_DAMAGE_RESPONSE	71	-0.41021216	-1.719664	0.01369863	0.020237144	0.908	3312	tags=41%, list=16%, signal=48%
REACTOME_NEDDYLATION	220	-0.33527136	-1.7183511	0.0	0.020361003	0.908	4657	tags=37%, list=22%, signal=47%
REACTOME_DNA_DAMAGE_RECOGNITION_IN_GG_NER	36	-0.47919655	-1.716093	0.012345679	0.02071023	0.914	5646	tags=47%, list=27%, signal=65%
REACTOME_CLEC7A_DECTIN_1_SIGNALING	95	-0.4009005	-1.7148424	0.0	0.02084258	0.916	4831	tags=43%, list=23%, signal=56%
REACTOME_SIGNALING_BY_NOTCH4	79	-0.42400107	-1.7140452	0.0	0.020914288	0.918	3540	tags=44%, list=17%, signal=53%
WP_GLUTATHIONE_METABOLISM	20	-0.54912084	-1.7131147	0.018604651	0.020953568	0.919	1990	tags=35%, list=10%, signal=39%
BIOCARTA_G1_PATHWAY	28	-0.4973695	-1.7125889	0.023391813	0.020973705	0.919	2906	tags=39%, list=14%, signal=46%
WP_ATM_SIGNALING_PATHWAY	38	-0.47438017	-1.7114918	0.0070921984	0.02107372	0.919	4689	tags=50%, list=22%, signal=64%
REACTOME_INHIBITION_OF_DNA_RECOMBINATION_AT_TELOMERE	20	-0.55148506	-1.6912487	0.012765957	0.024596112	0.958	5722	tags=60%, list=27%, signal=83%
REACTOME_RHOBTB2_GTPASE_CYCLE	23	-0.52917564	-1.690832	0.005235602	0.024555616	0.958	5964	tags=57%, list=29%, signal=79%
REACTOME_PROTEIN_METHYLATION	17	-0.5648091	-1.6871253	0.012875536	0.025041504	0.959	2329	tags=29%, list=11%, signal=33%
REACTOME_PHASE_II_CONJUGATION_OF_COMPOUNDS	92	-0.37713364	-1.6832182	0.0	0.025552446	0.966	1756	tags=21%, list=8%, signal=22%
BIOCARTA_G2_PATHWAY	24	-0.51297164	-1.6763715	0.0	0.026658759	0.972	3312	tags=46%, list=16%, signal=54%
WP_PARKINUBIQUITIN_PROTEASOMAL_SYSTEM_PATHWAY	69	-0.42494133	-1.674551	0.01369863	0.026995983	0.974	4444	tags=55%, list=21%, signal=70%
REACTOME_UB_SPECIFIC_PROCESSING_PROTEASES	157	-0.35796535	-1.6739898	0.0	0.026988117	0.974	3931	tags=36%, list=19%, signal=44%
KEGG_OXIDATIVE_PHOSPHORYLATION	107	-0.36333933	-1.670375	0.0	0.027539719	0.976	6206	tags=60%, list=30%, signal=85%
REACTOME_CLASS_I_PEROXISOMAL_MEMBRANE_PROTEIN_IMPORT	20	-0.5445448	-1.6663122	0.019323671	0.02821605	0.979	2230	tags=25%, list=11%, signal=28%
WP_CILIARY_LANDSCAPE	207	-0.34084082	-1.6584225	0.0	0.029890701	0.985	5646	tags=39%, list=27%, signal=52%
REACTOME_RECRUITMENT_OF_MITOTIC_CENTROSOME_PROTEINS_AND_COMPLEXES	79	-0.40137982	-1.6565529	0.0	0.03013802	0.985	5189	tags=38%, list=25%, signal=50%
BIOCARTA_VDR_PATHWAY	24	-0.5200622	-1.6535794	0.015544041	0.03062828	0.987	5599	tags=42%, list=27%, signal=57%
REACTOME_SIGNALING_BY_THE_B_CELL_RECEPTOR_BCR	106	-0.38422444	-1.6491853	0.0	0.031649843	0.987	3540	tags=36%, list=17%, signal=43%
REACTOME_PEROXISOMAL_LIPID_METABOLISM	27	-0.47188398	-1.648637	0.016574586	0.03167132	0.987	4987	tags=41%, list=24%, signal=53%
WP_INTEGRATED_CANCER_PATHWAY	43	-0.44665295	-1.6464787	0.0	0.032024816	0.988	3894	tags=44%, list=19%, signal=54%
REACTOME_CYTOPROTECTION_BY_HMOX1	112	-0.3718862	-1.6462169	0.0	0.0319762	0.988	3540	tags=38%, list=17%, signal=45%
REACTOME_ANCHORING_OF_THE_BASAL_BODY_TO_THE_PLASMA_MEMBRANE	93	-0.38576204	-1.6452415	0.0	0.032070026	0.989	5311	tags=40%, list=25%, signal=53%
REACTOME_CYCLIN_D_ASSOCIATED_EVENTS_IN_G1	47	-0.44042706	-1.6412768	0.0	0.03290095	0.99	3209	tags=36%, list=15%, signal=43%
REACTOME_MAPK6_MAPK4_SIGNALING	84	-0.3883314	-1.6385939	0.0	0.03335389	0.99	3540	tags=40%, list=17%, signal=49%
REACTOME_CYTOSOLIC_SENSORS_OF_PATHOGEN_ASSOCIATED_DNA	62	-0.41057274	-1.6310372	0.0	0.034868907	0.992	4253	tags=44%, list=20%, signal=55%
REACTOME_INTERLEUKIN_12_SIGNALING	43	-0.4357255	-1.6306063	0.008	0.034854576	0.992	5721	tags=49%, list=27%, signal=67%
REACTOME_FORMATION_OF_INCISION_COMPLEX_IN_GG_NER	41	-0.44189635	-1.6298574	0.021276595	0.034834992	0.992	4333	tags=39%, list=21%, signal=49%
REACTOME_TP53_REGULATES_TRANSCRIPTION_OF_CELL_CYCLE_GENES	47	-0.4323642	-1.6279927	0.017094018	0.035183705	0.992	2906	tags=36%, list=14%, signal=42%
REACTOME_TRANSCRIPTIONAL_REGULATION_BY_RUNX3	93	-0.37370285	-1.6270286	0.0	0.035281308	0.992	4487	tags=45%, list=21%, signal=57%
KEGG_DRUG_METABOLISM_CYTOCHROME_P450	51	-0.4125979	-1.6230395	0.0	0.036178943	0.992	903	tags=18%, list=4%, signal=18%
REACTOME_NONHOMOLOGOUS_END_JOINING_NHEJ	34	-0.46199265	-1.6123394	0.008064516	0.038897157	0.994	5795	tags=47%, list=28%, signal=65%
REACTOME_HCMV_EARLY_EVENTS	73	-0.39766473	-1.6073939	0.0	0.039933547	0.996	5724	tags=58%, list=27%, signal=79%
WP_CHOLESTEROL_BIOSYNTHESIS_PATHWAY	15	-0.55870146	-1.6062675	0.024096385	0.04009003	0.996	6203	tags=67%, list=30%, signal=95%
REACTOME_APOPTOSIS	164	-0.3596008	-1.6006519	0.0	0.041595265	0.999	5184	tags=45%, list=25%, signal=59%
WP_METHIONINE_DE_NOVO_AND_SALVAGE_PATHWAY	21	-0.50910664	-1.5986152	0.020408163	0.042003654	0.999	4365	tags=52%, list=21%, signal=66%
WP_TRIACYLGLYCERIDE_SYNTHESIS	20	-0.5218409	-1.5895219	0.023696683	0.04450893	1	1947	tags=30%, list=9%, signal=33%
REACTOME_TRISTETRAPROLIN_TTP_ZFP36_BINDS_AND_DESTABILIZES_MRNA	17	-0.52352667	-1.5871891	0.042801555	0.04497977	1	4963	tags=65%, list=24%, signal=85%
WP_GLYCEROLIPIDS_AND_GLYCEROPHOSPHOLIPIDS	21	-0.5038304	-1.5833993	0.027559055	0.04597628	1	4864	tags=52%, list=23%, signal=68%
KEGG_METABOLISM_OF_XENOBIOTICS_BY_CYTOCHROME_P450	55	-0.39847562	-1.582685	0.0	0.046044588	1	1629	tags=24%, list=8%, signal=26%
PID_MYC_ACTIV_PATHWAY	77	-0.3808191	-1.5806993	0.0	0.04656282	1	3176	tags=39%, list=15%, signal=46%
REACTOME_TRANSCRIPTIONAL_REGULATION_BY_RUNX1	166	-0.36160627	-1.5672777	0.0	0.050445054	1	3540	tags=33%, list=17%, signal=39%
KEGG_OOCYTE_MEIOSIS	103	-0.3531965	-1.5611352	0.0	0.052149747	1	3343	tags=29%, list=16%, signal=34%
KEGG_ASCORBATE_AND_ALDARATE_METABOLISM	17	-0.55091655	-1.5597767	0.052434456	0.052316826	1	1310	tags=35%, list=6%, signal=38%
REACTOME_REGULATION_OF_EXPRESSION_OF_SLITS_AND_ROBOS	162	-0.33174086	-1.5467095	0.0	0.056593437	1	3540	tags=27%, list=17%, signal=32%
REACTOME_DISEASES_OF_PROGRAMMED_CELL_DEATH	42	-0.43119118	-1.5461777	0.029850746	0.056637824	1	3769	tags=43%, list=18%, signal=52%
REACTOME_SUMOYLATION	168	-0.33101887	-1.5452256	0.0	0.05682121	1	4456	tags=35%, list=21%, signal=44%
REACTOME_FGFR2_ALTERNATIVE_SPLICING	27	-0.4774189	-1.5450186	0.027173912	0.05672577	1	6187	tags=63%, list=30%, signal=89%
REACTOME_METABOLISM_OF_NUCLEOTIDES	89	-0.3535593	-1.5378909	0.0	0.05911815	1	3475	tags=40%, list=17%, signal=48%
REACTOME_ABERRANT_REGULATION_OF_MITOTIC_G1_S_TRANSITION_IN_CANCER_DUE_TO_RB1_DEFECTS	17	-0.52944046	-1.5262414	0.047244094	0.063057505	1	2906	tags=53%, list=14%, signal=61%
KEGG_FATTY_ACID_METABOLISM	40	-0.41609553	-1.5166236	0.00729927	0.066960424	1	5331	tags=45%, list=25%, signal=60%
REACTOME_GLUTATHIONE_CONJUGATION	33	-0.44120422	-1.5154452	0.033333335	0.067300275	1	1243	tags=18%, list=6%, signal=19%
BIOCARTA_ARF_PATHWAY	17	-0.51359785	-1.5137333	0.06530612	0.06774329	1	1764	tags=24%, list=8%, signal=26%
REACTOME_DNA_DAMAGE_TELOMERE_STRESS_INDUCED_SENESCENCE	27	-0.46197417	-1.5134429	0.03314917	0.06769328	1	5735	tags=56%, list=27%, signal=76%
REACTOME_PCP_CE_PATHWAY	88	-0.3393349	-1.5109279	0.015384615	0.06853702	1	3678	tags=40%, list=18%, signal=48%
REACTOME_BUTYRATE_RESPONSE_FACTOR_1_BRF1_BINDS_AND_DESTABILIZES_MRNA	17	-0.51660204	-1.505236	0.03629032	0.070646815	1	4963	tags=59%, list=24%, signal=77%
REACTOME_DEADENYLATION_DEPENDENT_MRNA_DECAY	54	-0.38535514	-1.5021845	0.008928572	0.071802445	1	4916	tags=46%, list=24%, signal=60%
BIOCARTA_P53_PATHWAY	15	-0.5245142	-1.4886717	0.05645161	0.07816755	1	2906	tags=47%, list=14%, signal=54%
BIOCARTA_EFP_PATHWAY	16	-0.5262898	-1.4812163	0.06374502	0.08133726	1	5608	tags=56%, list=27%, signal=77%
REACTOME_PROCESSING_OF_SMDT1	16	-0.5213444	-1.4728857	0.053380784	0.085246444	1	6829	tags=63%, list=33%, signal=93%
REACTOME_HSP90_CHAPERONE_CYCLE_FOR_STEROID_HORMONE_RECEPTORS_SHR_IN_THE_PRESENCE_OF_LIGAND	54	-0.36729234	-1.4724602	0.010526316	0.085209966	1	5713	tags=50%, list=27%, signal=69%
REACTOME_GENE_SILENCING_BY_RNA	77	-0.36258784	-1.4698681	0.013157895	0.08613283	1	3635	tags=49%, list=17%, signal=60%
REACTOME_BASE_EXCISION_REPAIR_AP_SITE_FORMATION	17	-0.5006389	-1.4621273	0.084745765	0.08977102	1	4675	tags=47%, list=22%, signal=61%
WP_COHESIN_COMPLEX_CORNELIA_DE_LANGE_SYNDROME	33	-0.40561104	-1.4542996	0.018867925	0.09358181	1	2887	tags=33%, list=14%, signal=39%
REACTOME_MEIOSIS	54	-0.38207301	-1.4531968	0.061946902	0.09396071	1	3998	tags=39%, list=19%, signal=48%
KEGG_RETINOL_METABOLISM	48	-0.36157936	-1.4468542	0.01904762	0.09714025	1	1629	tags=23%, list=8%, signal=25%
REACTOME_HCMV_INFECTION	97	-0.3417481	-1.4458812	0.0	0.09740177	1	5724	tags=52%, list=27%, signal=71%
KEGG_GLYCEROLIPID_METABOLISM	43	-0.4027821	-1.444378	0.03521127	0.097958684	1	5633	tags=47%, list=27%, signal=64%
REACTOME_INFLUENZA_INFECTION	152	-0.30958864	-1.4438553	0.0	0.0979525	1	3635	tags=27%, list=17%, signal=32%
REACTOME_COOPERATION_OF_PREFOLDIN_AND_TRIC_CCT_IN_ACTIN_AND_TUBULIN_FOLDING	33	-0.42097157	-1.4426554	0.053846154	0.09834206	1	3488	tags=48%, list=17%, signal=58%
REACTOME_TCR_SIGNALING	109	-0.32618865	-1.4373195	0.0	0.10124942	1	3540	tags=37%, list=17%, signal=44%
REACTOME_RHO_GTPASE_EFFECTORS	257	-0.3051566	-1.4353383	0.0	0.101869434	1	3012	tags=26%, list=14%, signal=30%
WP_TRANSLATION_FACTORS	51	-0.36922285	-1.4317597	0.00862069	0.103712544	1	4394	tags=39%, list=21%, signal=50%
REACTOME_RECRUITMENT_OF_NUMA_TO_MITOTIC_CENTROSOMES	93	-0.33930022	-1.4306389	0.023255814	0.104109995	1	3510	tags=29%, list=17%, signal=35%
REACTOME_GLUCURONIDATION	15	-0.5110757	-1.4285752	0.062962964	0.105080076	1	1756	tags=40%, list=8%, signal=44%
REACTOME_GLYOXYLATE_METABOLISM_AND_GLYCINE_DEGRADATION	26	-0.43031293	-1.4252733	0.06878307	0.106808655	1	4856	tags=62%, list=23%, signal=80%
WP_NSP1_FROM_SARSCOV2_INHIBITS_TRANSLATION_INITIATION_IN_THE_HOST_CELL	16	-0.4797727	-1.4241577	0.08597285	0.10707213	1	6205	tags=69%, list=30%, signal=98%
KEGG_PURINE_METABOLISM	149	-0.2853343	-1.4231759	0.0	0.10738058	1	3338	tags=34%, list=16%, signal=40%
REACTOME_INTERLEUKIN_1_SIGNALING	96	-0.33230788	-1.4170676	0.0	0.110545695	1	4261	tags=44%, list=20%, signal=55%
REACTOME_SIGNALING_BY_HEDGEHOG	143	-0.30389947	-1.4165293	0.0	0.11053299	1	4657	tags=38%, list=22%, signal=49%
WP_NRF2ARE_REGULATION	21	-0.43564856	-1.4114563	0.063725494	0.11337892	1	788	tags=24%, list=4%, signal=25%
KEGG_ONE_CARBON_POOL_BY_FOLATE	17	-0.4766329	-1.4104353	0.08984375	0.11366504	1	2683	tags=47%, list=13%, signal=54%
BIOCARTA_FAS_PATHWAY	29	-0.42201516	-1.4085858	0.0591133	0.11440805	1	5127	tags=41%, list=25%, signal=55%
KEGG_BUTANOATE_METABOLISM	30	-0.4048868	-1.4039968	0.064935066	0.11733417	1	4665	tags=50%, list=22%, signal=64%
REACTOME_FATTY_ACYL_COA_BIOSYNTHESIS	37	-0.3862226	-1.4039478	0.03846154	0.11702792	1	6398	tags=59%, list=31%, signal=86%
KEGG_PROGESTERONE_MEDIATED_OOCYTE_MATURATION	82	-0.34981245	-1.3981158	0.041666668	0.120550215	1	4286	tags=34%, list=20%, signal=43%
WP_CONSTITUTIVE_ANDROSTANE_RECEPTOR_PATHWAY	25	-0.42059293	-1.3972828	0.08045977	0.12084097	1	4572	tags=32%, list=22%, signal=41%
REACTOME_HSF1_ACTIVATION	29	-0.40815684	-1.3922346	0.075581394	0.12387975	1	3998	tags=45%, list=19%, signal=55%
BIOCARTA_RACCYCD_PATHWAY	26	-0.41410094	-1.3884172	0.08018868	0.12631182	1	2906	tags=27%, list=14%, signal=31%
REACTOME_DEUBIQUITINATION	232	-0.2891964	-1.3876863	0.0	0.12658043	1	3931	tags=30%, list=19%, signal=37%
REACTOME_PURINE_CATABOLISM	16	-0.47408247	-1.3824952	0.092	0.12999855	1	3475	tags=56%, list=17%, signal=67%
KEGG_PEROXISOME	74	-0.31756848	-1.3818496	0.032786883	0.13015994	1	5313	tags=36%, list=25%, signal=49%
REACTOME_FC_EPSILON_RECEPTOR_FCERI_SIGNALING	126	-0.29943198	-1.375688	0.0	0.13410194	1	3540	tags=29%, list=17%, signal=35%
KEGG_DRUG_METABOLISM_OTHER_ENZYMES	36	-0.39033955	-1.3748938	0.06382979	0.13440815	1	3398	tags=36%, list=16%, signal=43%
REACTOME_ATTENUATION_PHASE	26	-0.42294484	-1.3679295	0.06282722	0.13909332	1	2929	tags=35%, list=14%, signal=40%
KEGG_VALINE_LEUCINE_AND_ISOLEUCINE_DEGRADATION	41	-0.37297398	-1.3644903	0.062992126	0.14140044	1	5331	tags=46%, list=25%, signal=62%
REACTOME_PROGRAMMED_CELL_DEATH	192	-0.2816267	-1.363798	0.0	0.1415304	1	4768	tags=38%, list=23%, signal=48%
REACTOME_CELLULAR_RESPONSE_TO_CHEMICAL_STRESS	145	-0.29848891	-1.3579142	0.0	0.14585006	1	3540	tags=34%, list=17%, signal=41%
WP_APOPTOSIS_MODULATION_BY_HSP70	18	-0.4659328	-1.3550181	0.10569106	0.14758223	1	5127	tags=56%, list=25%, signal=74%
REACTOME_REGULATION_OF_TP53_ACTIVITY_THROUGH_ACETYLATION	29	-0.39162275	-1.3518078	0.06486487	0.14963323	1	6494	tags=62%, list=31%, signal=90%
REACTOME_RHOBTB_GTPASE_CYCLE	34	-0.38320664	-1.346934	0.05732484	0.15298882	1	5964	tags=44%, list=29%, signal=62%
REACTOME_SYNTHESIS_OF_VERY_LONG_CHAIN_FATTY_ACYL_COAS	24	-0.41337633	-1.3450758	0.104761906	0.15402086	1	6398	tags=67%, list=31%, signal=96%
KEGG_BIOSYNTHESIS_OF_UNSATURATED_FATTY_ACIDS	22	-0.42724466	-1.3447196	0.12	0.15393294	1	3409	tags=27%, list=16%, signal=33%
REACTOME_PTEN_REGULATION	133	-0.28335968	-1.3441079	0.0	0.15401466	1	4261	tags=36%, list=20%, signal=45%
REACTOME_ANTIGEN_PROCESSING_CROSS_PRESENTATION	100	-0.30298063	-1.3429743	0.0	0.15446533	1	3749	tags=41%, list=18%, signal=50%
WP_MIRNAS_INVOLVED_IN_DNA_DAMAGE_RESPONSE	20	-0.43163908	-1.3416537	0.09793814	0.15522511	1	1225	tags=40%, list=6%, signal=42%
REACTOME_TRANSCRIPTIONAL_REGULATION_BY_RUNX2	113	-0.29271597	-1.3391999	0.0	0.15699755	1	3540	tags=40%, list=17%, signal=48%
WP_FAMILIAL_PARTIAL_LIPODYSTROPHY_FPLD	27	-0.3885955	-1.3369503	0.09659091	0.15849115	1	2808	tags=37%, list=13%, signal=43%
PID_PRL_SIGNALING_EVENTS_PATHWAY	23	-0.39709994	-1.3359455	0.09313726	0.15893012	1	1174	tags=17%, list=6%, signal=18%
WP_ETHANOL_EFFECTS_ON_HISTONE_MODIFICATIONS	30	-0.37876543	-1.3321775	0.09392265	0.16124392	1	3154	tags=30%, list=15%, signal=35%
WP_ANTIVIRAL_AND_ANTIINFLAMMATORY_EFFECTS_OF_NRF2_ON_SARSCOV2_PATHWAY	31	-0.38216433	-1.3300754	0.072289154	0.16266476	1	1209	tags=23%, list=6%, signal=24%
KEGG_ALANINE_ASPARTATE_AND_GLUTAMATE_METABOLISM	28	-0.38040623	-1.3213639	0.12154696	0.1699587	1	2773	tags=36%, list=13%, signal=41%
REACTOME_ERCC6_CSB_AND_EHMT2_G9A_POSITIVELY_REGULATE_RRNA_EXPRESSION	15	-0.46412104	-1.3203449	0.15662651	0.17032097	1	6226	tags=60%, list=30%, signal=85%
REACTOME_FORMATION_OF_TUBULIN_FOLDING_INTERMEDIATES_BY_CCT_TRIC	26	-0.41040215	-1.3113667	0.11111111	0.178051	1	3488	tags=50%, list=17%, signal=60%
REACTOME_MISCELLANEOUS_TRANSPORT_AND_BINDING_EVENTS	22	-0.39991534	-1.3087145	0.12809917	0.18014933	1	3128	tags=27%, list=15%, signal=32%
REACTOME_INTERCONVERSION_OF_NUCLEOTIDE_DI_AND_TRIPHOSPHATES	29	-0.37741986	-1.3084108	0.096551724	0.17993486	1	3185	tags=41%, list=15%, signal=49%
REACTOME_INTERLEUKIN_12_FAMILY_SIGNALING	52	-0.32619533	-1.3083928	0.056074765	0.17947438	1	5721	tags=44%, list=27%, signal=61%
REACTOME_KINESINS	59	-0.33468622	-1.308039	0.07692308	0.17938718	1	2520	tags=34%, list=12%, signal=38%
REACTOME_C_TYPE_LECTIN_RECEPTORS_CLRS	129	-0.2872805	-1.3068299	0.0	0.1800237	1	3540	tags=29%, list=17%, signal=35%
BIOCARTA_RACC_PATHWAY	15	-0.45701972	-1.3011416	0.1444867	0.18476047	1	2910	tags=40%, list=14%, signal=46%
KEGG_PORPHYRIN_AND_CHLOROPHYLL_METABOLISM	31	-0.36934325	-1.2951281	0.0989011	0.18992531	1	2926	tags=39%, list=14%, signal=45%
WP_PROGERIAASSOCIATED_LIPODYSTROPHY	20	-0.40505025	-1.2946101	0.12727273	0.18996896	1	1914	tags=35%, list=9%, signal=38%
WP_MITOCHONDRIAL_IMMUNE_RESPONSE_TO_SARSCOV2	30	-0.37783056	-1.2918952	0.12021858	0.19213524	1	4600	tags=43%, list=22%, signal=55%
REACTOME_DEPOLYMERISATION_OF_THE_NUCLEAR_LAMINA	15	-0.4486779	-1.2877853	0.16666667	0.19552314	1	1353	tags=27%, list=6%, signal=28%
REACTOME_DISORDERS_OF_TRANSMEMBRANE_TRANSPORTERS	162	-0.2726217	-1.2873678	0.0	0.1954039	1	3544	tags=40%, list=17%, signal=47%
REACTOME_HSF1_DEPENDENT_TRANSACTIVATION	36	-0.37598437	-1.2847993	0.125	0.19773324	1	2352	tags=28%, list=11%, signal=31%
WP_GLUCURONIDATION	17	-0.43645826	-1.2799985	0.12790698	0.20220391	1	442	tags=24%, list=2%, signal=24%
WP_EFFECT_OF_PROGERIN_ON_GENES_INVOLVED_IN_HUTCHINSONGILFORD_PROGERIA_SYNDROME	21	-0.3996384	-1.2770554	0.14537445	0.20470598	1	6226	tags=57%, list=30%, signal=81%
REACTOME_METABOLISM_OF_PORPHYRINS	25	-0.3859771	-1.2730777	0.13197969	0.20842396	1	3418	tags=44%, list=16%, signal=53%
WP_FATTY_ACID_TRANSPORTERS	16	-0.45068914	-1.2716506	0.19196428	0.20941262	1	7047	tags=69%, list=34%, signal=104%
KEGG_RNA_DEGRADATION	55	-0.3095933	-1.2633023	0.071428575	0.21792915	1	5452	tags=53%, list=26%, signal=71%
WP_FOXA2_PATHWAY	18	-0.4258491	-1.262443	0.14859438	0.21833935	1	2286	tags=39%, list=11%, signal=44%
BIOCARTA_STATHMIN_PATHWAY	16	-0.43138033	-1.2576531	0.18333334	0.22323821	1	4054	tags=44%, list=19%, signal=54%
KEGG_CYSTEINE_AND_METHIONINE_METABOLISM	33	-0.37489995	-1.2560917	0.15254237	0.2244748	1	3946	tags=45%, list=19%, signal=56%
WP_CYSTEINE_AND_METHIONINE_CATABOLISM	15	-0.44180083	-1.25495	0.196	0.22518753	1	5220	tags=47%, list=25%, signal=62%
REACTOME_INTRINSIC_PATHWAY_FOR_APOPTOSIS	52	-0.32361594	-1.2513752	0.13675214	0.22915925	1	7001	tags=54%, list=33%, signal=81%
REACTOME_SYNTHESIS_OF_ACTIVE_UBIQUITIN_ROLES_OF_E1_AND_E2_ENZYMES	30	-0.37006947	-1.2504433	0.13772455	0.2296985	1	4281	tags=33%, list=20%, signal=42%
REACTOME_GLYCEROPHOSPHOLIPID_BIOSYNTHESIS	116	-0.27833822	-1.2453703	0.032258064	0.23512061	1	2117	tags=17%, list=10%, signal=19%
BIOCARTA_EIF_PATHWAY	15	-0.43253255	-1.2449423	0.20070423	0.2349795	1	6205	tags=67%, list=30%, signal=95%
WP_GLYCEROPHOSPHOLIPID_BIOSYNTHETIC_PATHWAY	29	-0.3686173	-1.2411838	0.14450867	0.23910451	1	4411	tags=34%, list=21%, signal=44%
KEGG_BASAL_TRANSCRIPTION_FACTORS	33	-0.3472221	-1.2313758	0.14705883	0.24996305	1	5465	tags=55%, list=26%, signal=74%
REACTOME_MITOCHONDRIAL_BIOGENESIS	86	-0.30046716	-1.2284554	0.1	0.25293657	1	4989	tags=42%, list=24%, signal=55%
REACTOME_MRNA_DECAY_BY_5_TO_3_EXORIBONUCLEASE	15	-0.43247738	-1.224478	0.19915254	0.2574132	1	5452	tags=60%, list=26%, signal=81%
REACTOME_TNFR2_NON_CANONICAL_NF_KB_PATHWAY	94	-0.28914216	-1.2225102	0.083333336	0.25935546	1	3659	tags=41%, list=17%, signal=50%
KEGG_GLYCEROPHOSPHOLIPID_METABOLISM	69	-0.30011386	-1.2188356	0.10810811	0.26305217	1	4411	tags=33%, list=21%, signal=42%
WP_PHOTODYNAMIC_THERAPYINDUCED_NFE2L2_NRF2_SURVIVAL_SIGNALING	23	-0.3777184	-1.2155645	0.17224881	0.2669978	1	4038	tags=43%, list=19%, signal=54%
REACTOME_PROTEIN_UBIQUITINATION	64	-0.29872197	-1.214929	0.093333334	0.2671562	1	4281	tags=27%, list=20%, signal=33%
KEGG_PENTOSE_AND_GLUCURONATE_INTERCONVERSIONS	20	-0.38913712	-1.2136228	0.19827586	0.26829392	1	442	tags=20%, list=2%, signal=20%
REACTOME_NUCLEAR_SIGNALING_BY_ERBB4	31	-0.34609586	-1.213214	0.19337016	0.2681641	1	2133	tags=23%, list=10%, signal=25%
REACTOME_APOPTOTIC_FACTOR_MEDIATED_RESPONSE	18	-0.39362833	-1.2109915	0.19313304	0.2703197	1	5163	tags=44%, list=25%, signal=59%
WP_SPHINGOLIPID_METABOLISM_IN_SENESCENCE	28	-0.34977278	-1.2071148	0.14507772	0.2747399	1	4274	tags=39%, list=20%, signal=49%
WP_ONECARBON_METABOLISM	30	-0.35126716	-1.2055393	0.15428571	0.2762284	1	2849	tags=37%, list=14%, signal=42%
WP_UREA_CYCLE_AND_ASSOCIATED_PATHWAYS	23	-0.3837414	-1.202894	0.15962441	0.27899018	1	1924	tags=35%, list=9%, signal=38%
REACTOME_ANTIGEN_PROCESSING_UBIQUITINATION_PROTEASOME_DEGRADATION	294	-0.25571632	-1.2010015	0.0	0.28081027	1	4998	tags=34%, list=24%, signal=44%
PID_MYC_PATHWAY	25	-0.36203417	-1.1959393	0.20212767	0.28698888	1	4958	tags=36%, list=24%, signal=47%
BIOCARTA_CASPASE_PATHWAY	21	-0.38248628	-1.1937487	0.21338913	0.28948212	1	5656	tags=52%, list=27%, signal=72%
REACTOME_MITOCHONDRIAL_FATTY_ACID_BETA_OXIDATION	35	-0.33941498	-1.192876	0.18954249	0.28995565	1	4849	tags=31%, list=23%, signal=41%
REACTOME_BIOSYNTHESIS_OF_THE_N_GLYCAN_PRECURSOR_DOLICHOL_LIPID_LINKED_OLIGOSACCHARIDE_LLO_AND_TRANSFER_TO_A_NASCENT_PROTEIN	75	-0.2919108	-1.1873399	0.12	0.29685074	1	4696	tags=36%, list=22%, signal=46%
KEGG_HUNTINGTONS_DISEASE	162	-0.25859055	-1.1844493	0.055555556	0.30038226	1	6226	tags=47%, list=30%, signal=66%
REACTOME_COPI_DEPENDENT_GOLGI_TO_ER_RETROGRADE_TRAFFIC	96	-0.26464817	-1.183752	0.0952381	0.30071872	1	3488	tags=27%, list=17%, signal=32%
WP_CYTOSOLIC_DNASENSING_PATHWAY	57	-0.29324493	-1.1682184	0.18181819	0.32336006	1	4722	tags=37%, list=23%, signal=47%
REACTOME_TCF_DEPENDENT_SIGNALING_IN_RESPONSE_TO_WNT	163	-0.2521946	-1.167873	0.15384616	0.32307944	1	4624	tags=36%, list=22%, signal=46%
REACTOME_MHC_CLASS_II_ANTIGEN_PRESENTATION	119	-0.2574944	-1.1668774	0.1	0.3237982	1	3488	tags=24%, list=17%, signal=29%
KEGG_PROPANOATE_METABOLISM	30	-0.3331701	-1.1646509	0.20238096	0.326404	1	4685	tags=47%, list=22%, signal=60%
WP_TUMOR_SUPPRESSOR_ACTIVITY_OF_SMARCB1	29	-0.33772284	-1.1611809	0.20454545	0.33133677	1	5334	tags=41%, list=25%, signal=55%
WP_METABOLISM_OF_SPINGOLIPIDS_IN_ER_AND_GOLGI_APPARATUS	19	-0.38386708	-1.1595168	0.2672065	0.3331517	1	4004	tags=37%, list=19%, signal=46%
BIOCARTA_BAD_PATHWAY	22	-0.3568626	-1.1548203	0.24242425	0.33971882	1	5376	tags=36%, list=26%, signal=49%
PID_FAS_PATHWAY	37	-0.32128754	-1.154605	0.20143884	0.33926782	1	5943	tags=43%, list=28%, signal=60%
KEGG_LYSINE_DEGRADATION	42	-0.31386557	-1.1515787	0.23076923	0.3433799	1	4897	tags=43%, list=23%, signal=56%
REACTOME_BIOLOGICAL_OXIDATIONS	188	-0.25030214	-1.1497267	0.09090909	0.3454342	1	1847	tags=17%, list=9%, signal=19%
WP_FATTY_ACID_BETAOXIDATION	32	-0.3230565	-1.1439123	0.21568628	0.3542331	1	5313	tags=44%, list=25%, signal=59%
REACTOME_SIGNALING_BY_ROBO_RECEPTORS	206	-0.2390444	-1.1392881	0.0	0.36117074	1	3781	tags=23%, list=18%, signal=28%
REACTOME_MITOPHAGY	29	-0.3432226	-1.1391261	0.23076923	0.36068198	1	2929	tags=28%, list=14%, signal=32%
REACTOME_TRIGLYCERIDE_METABOLISM	30	-0.34019914	-1.1331822	0.2760736	0.3699279	1	2521	tags=30%, list=12%, signal=34%
KEGG_N_GLYCAN_BIOSYNTHESIS	46	-0.2965917	-1.132075	0.22834645	0.3708769	1	5518	tags=35%, list=26%, signal=47%
REACTOME_ORGANELLE_BIOGENESIS_AND_MAINTENANCE	276	-0.22561352	-1.1279057	0.0	0.37688953	1	4989	tags=33%, list=24%, signal=43%
KEGG_GLYCOSYLPHOSPHATIDYLINOSITOL_GPI_ANCHOR_BIOSYNTHESIS	25	-0.34877777	-1.1218492	0.2631579	0.38638037	1	7325	tags=64%, list=35%, signal=98%
PID_LIS1_PATHWAY	28	-0.32405096	-1.1209122	0.2972973	0.38724163	1	919	tags=11%, list=4%, signal=11%
WP_MALE_INFERTILITY	121	-0.2448061	-1.1196449	0.21212122	0.38872254	1	3071	tags=25%, list=15%, signal=29%
REACTOME_NONSENSE_MEDIATED_DECAY_NMD	112	-0.25574353	-1.1192929	0.15384616	0.38851494	1	15598	tags=100%, list=75%, signal=391%
REACTOME_BRANCHED_CHAIN_AMINO_ACID_CATABOLISM	21	-0.34421661	-1.1181937	0.2900433	0.38945335	1	3870	tags=38%, list=19%, signal=47%
REACTOME_SYNTHESIS_OF_PA	35	-0.31739664	-1.1155461	0.29012346	0.39314815	1	1724	tags=17%, list=8%, signal=19%
BIOCARTA_CARM_ER_PATHWAY	25	-0.33595765	-1.1147764	0.27083334	0.3936546	1	6226	tags=52%, list=30%, signal=74%
REACTOME_ACTIVATION_OF_BAD_AND_TRANSLOCATION_TO_MITOCHONDRIA	15	-0.3991562	-1.1138144	0.28294572	0.39442438	1	8025	tags=73%, list=38%, signal=119%
REACTOME_REGULATION_OF_TP53_EXPRESSION_AND_DEGRADATION	37	-0.3055525	-1.1119448	0.24342105	0.39693958	1	3950	tags=32%, list=19%, signal=40%
REACTOME_SIGNALING_BY_ERBB4	57	-0.2850097	-1.1112049	0.24778761	0.39748004	1	2929	tags=21%, list=14%, signal=24%
WP_S1P_RECEPTOR_SIGNAL_TRANSDUCTION	25	-0.33683848	-1.1066002	0.2849741	0.4048768	1	4004	tags=32%, list=19%, signal=40%
REACTOME_PINK1_PRKN_MEDIATED_MITOPHAGY	22	-0.34850618	-1.1014	0.26767677	0.41290456	1	2929	tags=32%, list=14%, signal=37%
WP_HISTONE_MODIFICATIONS	37	-0.3037264	-1.1003138	0.2888889	0.41389167	1	5432	tags=43%, list=26%, signal=58%
REACTOME_RIP_MEDIATED_NFKB_ACTIVATION_VIA_ZBP1	17	-0.37761793	-1.0929502	0.29508197	0.42649886	1	4880	tags=47%, list=23%, signal=61%
WP_MITOCHONDRIAL_LONG_CHAIN_FATTY_ACID_BETAOXIDATION	17	-0.3587197	-1.092115	0.28625953	0.42721477	1	5180	tags=41%, list=25%, signal=55%
WP_4HYDROXYTAMOXIFEN_DEXAMETHASONE_AND_RETINOIC_ACIDS_REGULATION_OF_P27_EXPRESSION	18	-0.3616488	-1.0884068	0.33606556	0.43308264	1	2015	tags=22%, list=10%, signal=25%
WP_PREGNANE_X_RECEPTOR_PATHWAY	27	-0.32702366	-1.0793263	0.33170733	0.44960403	1	2390	tags=22%, list=11%, signal=25%
BIOCARTA_MPR_PATHWAY	20	-0.35163057	-1.0791662	0.32882884	0.44900098	1	5368	tags=55%, list=26%, signal=74%
REACTOME_LYSOSOME_VESICLE_BIOGENESIS	35	-0.29789123	-1.0789763	0.32903227	0.44836932	1	5734	tags=40%, list=27%, signal=55%
PID_TELOMERASE_PATHWAY	63	-0.25951555	-1.0788426	0.30487806	0.44765082	1	3774	tags=30%, list=18%, signal=37%
REACTOME_PLATELET_SENSITIZATION_BY_LDL	17	-0.35198066	-1.0733358	0.3531746	0.45781946	1	5203	tags=53%, list=25%, signal=70%
REACTOME_METABOLIC_DISORDERS_OF_BIOLOGICAL_OXIDATION_ENZYMES	29	-0.30795625	-1.0713269	0.35672516	0.4608448	1	2849	tags=34%, list=14%, signal=40%
REACTOME_EUKARYOTIC_TRANSLATION_INITIATION	115	-0.24041206	-1.0702823	0.24324325	0.46210423	1	15571	tags=99%, list=74%, signal=386%
PID_P73PATHWAY	76	-0.25957984	-1.0606945	0.36231884	0.48009324	1	2943	tags=24%, list=14%, signal=27%
REACTOME_GOLGI_TO_ER_RETROGRADE_TRANSPORT	128	-0.23011419	-1.0568169	0.29411766	0.48699737	1	4984	tags=31%, list=24%, signal=41%
WP_TRYPTOPHAN_METABOLISM	37	-0.28192952	-1.0562333	0.35714287	0.48724842	1	2844	tags=38%, list=14%, signal=44%
REACTOME_ESTROGEN_DEPENDENT_GENE_EXPRESSION	88	-0.24394506	-1.054284	0.27659574	0.49047044	1	3325	tags=26%, list=16%, signal=31%
REACTOME_RHOBTB1_GTPASE_CYCLE	22	-0.33833537	-1.051837	0.40957448	0.4945558	1	5964	tags=41%, list=29%, signal=57%
REACTOME_ACTIVATION_OF_BH3_ONLY_PROTEINS	30	-0.30402452	-1.0504484	0.39378238	0.4962861	1	6930	tags=53%, list=33%, signal=80%
WP_GENES_ASSOCIATED_WITH_THE_DEVELOPMENT_OF_RHEUMATOID_ARTHRITIS	15	-0.37286937	-1.0458146	0.44727272	0.5050296	1	1780	tags=27%, list=9%, signal=29%
WP_UREA_CYCLE_AND_METABOLISM_OF_AMINO_GROUPS	20	-0.34180373	-1.0432893	0.37155962	0.50941247	1	496	tags=20%, list=2%, signal=20%
REACTOME_ZBP1_DAI_MEDIATED_INDUCTION_OF_TYPE_I_IFNS	20	-0.33037123	-1.0413957	0.39148936	0.5125437	1	4880	tags=45%, list=23%, signal=59%
REACTOME_HATS_ACETYLATE_HISTONES	79	-0.25596553	-1.0364288	0.42592594	0.52191925	1	6849	tags=46%, list=33%, signal=67%
REACTOME_SELENOAMINO_ACID_METABOLISM	105	-0.22933291	-1.0346123	0.43589744	0.524736	1	15695	tags=99%, list=75%, signal=395%
WP_PRADERWILLI_AND_ANGELMAN_SYNDROME	56	-0.2686947	-1.0326191	0.36263737	0.5277422	1	2738	tags=20%, list=13%, signal=23%
WP_3Q29_COPY_NUMBER_VARIATION_SYNDROME	62	-0.26175717	-1.0258725	0.3723404	0.5413363	1	3293	tags=23%, list=16%, signal=27%
KEGG_ABC_TRANSPORTERS	43	-0.27315548	-1.0229553	0.4473684	0.54686356	1	5302	tags=40%, list=25%, signal=53%
WP_SULFATION_BIOTRANSFORMATION_REACTION	16	-0.34905547	-1.0195152	0.41152263	0.5533472	1	1473	tags=19%, list=7%, signal=20%
KEGG_CYTOSOLIC_DNA_SENSING_PATHWAY	39	-0.27754274	-1.0189922	0.42424244	0.55331427	1	1764	tags=18%, list=8%, signal=20%
REACTOME_SYNTHESIS_OF_PC	27	-0.30868155	-1.0188261	0.41237113	0.5525449	1	1400	tags=19%, list=7%, signal=20%
BIOCARTA_CHEMICAL_PATHWAY	17	-0.3487164	-1.0092354	0.4349776	0.5728171	1	5184	tags=47%, list=25%, signal=63%
KEGG_PROTEIN_EXPORT	23	-0.32281205	-1.0038899	0.45918366	0.5841513	1	5800	tags=43%, list=28%, signal=60%
REACTOME_SIGNALING_BY_NOTCH	169	-0.21280567	-1.0028561	0.54545456	0.58528924	1	3583	tags=27%, list=17%, signal=32%
PID_HIV_NEF_PATHWAY	34	-0.28287292	-1.0026443	0.4759036	0.5845121	1	4689	tags=41%, list=22%, signal=53%
WP_7Q1123_COPY_NUMBER_VARIATION_SYNDROME	100	-0.22177356	-1.0025128	0.47058824	0.5836086	1	3899	tags=28%, list=19%, signal=34%
WP_GENES_RELATED_TO_PRIMARY_CILIUM_DEVELOPMENT_BASED_ON_CRISPR	94	-0.22886993	-1.0009751	0.4878049	0.58584046	1	6101	tags=33%, list=29%, signal=46%
REACTOME_PROTEIN_FOLDING	96	-0.23109299	-1.0008185	0.41304347	0.5850392	1	3696	tags=24%, list=18%, signal=29%
KEGG_GLYCOSAMINOGLYCAN_BIOSYNTHESIS_HEPARAN_SULFATE	26	-0.29756433	-0.99658453	0.43589744	0.5934589	1	3243	tags=19%, list=16%, signal=23%
REACTOME_RND2_GTPASE_CYCLE	42	-0.270178	-0.99336994	0.49635038	0.5996799	1	2378	tags=17%, list=11%, signal=19%
BIOCARTA_MITOCHONDRIA_PATHWAY	18	-0.3299076	-0.98990595	0.47081712	0.60597974	1	5163	tags=50%, list=25%, signal=66%
REACTOME_CELLULAR_SENESCENCE	126	-0.21390836	-0.98547256	0.4347826	0.6149692	1	5184	tags=37%, list=25%, signal=48%
WP_SARS_CORONAVIRUS_AND_INNATE_IMMUNITY	17	-0.3258034	-0.98265606	0.49130434	0.6201785	1	4290	tags=35%, list=21%, signal=44%
KEGG_UBIQUITIN_MEDIATED_PROTEOLYSIS	132	-0.21991307	-0.9779873	0.5416667	0.62939656	1	5473	tags=33%, list=26%, signal=45%
WP_7OXOC_AND_7BETAHC_PATHWAYS	25	-0.29417205	-0.97756386	0.4715026	0.62908965	1	3409	tags=20%, list=16%, signal=24%
WP_22Q112_COPY_NUMBER_VARIATION_SYNDROME	117	-0.21343392	-0.97551715	0.51724136	0.63254184	1	3353	tags=23%, list=16%, signal=27%
BIOCARTA_IGF1MTOR_PATHWAY	18	-0.32506207	-0.97081417	0.47659576	0.64208573	1	3722	tags=33%, list=18%, signal=41%
KEGG_HISTIDINE_METABOLISM	27	-0.29667756	-0.96415573	0.5	0.65602916	1	3154	tags=30%, list=15%, signal=35%
BIOCARTA_LIS1_PATHWAY	19	-0.31737003	-0.95930856	0.4976526	0.6656163	1	331	tags=11%, list=2%, signal=11%
REACTOME_PEROXISOMAL_PROTEIN_IMPORT	59	-0.24559706	-0.9588133	0.5392157	0.6655078	1	4987	tags=29%, list=24%, signal=38%
REACTOME_RAS_PROCESSING	23	-0.29761028	-0.95357066	0.55609757	0.6764546	1	7067	tags=52%, list=34%, signal=79%
REACTOME_DEFECTIVE_INTRINSIC_PATHWAY_FOR_APOPTOSIS	24	-0.30107817	-0.95194036	0.5117371	0.67901313	1	4161	tags=33%, list=20%, signal=42%
REACTOME_DDX58_IFIH1_MEDIATED_INDUCTION_OF_INTERFERON_ALPHA_BETA	67	-0.22934891	-0.9509583	0.5520833	0.6800012	1	4958	tags=31%, list=24%, signal=41%
REACTOME_SYNTHESIS_OF_GLYCOSYLPHOSPHATIDYLINOSITOL_GPI	18	-0.32310733	-0.9505066	0.5814978	0.67968786	1	7166	tags=67%, list=34%, signal=101%
REACTOME_TRANSCRIPTIONAL_ACTIVATION_OF_MITOCHONDRIAL_BIOGENESIS	53	-0.23741601	-0.94715273	0.6	0.6861875	1	3057	tags=23%, list=15%, signal=26%
WP_ENERGY_METABOLISM	45	-0.26134685	-0.94277257	0.5135135	0.69516915	1	3165	tags=20%, list=15%, signal=24%
REACTOME_RAC3_GTPASE_CYCLE	90	-0.2158416	-0.9414962	0.5925926	0.6967765	1	2618	tags=17%, list=13%, signal=19%
REACTOME_BETA_CATENIN_INDEPENDENT_WNT_SIGNALING	142	-0.20755525	-0.9393904	0.75	0.70051616	1	3678	tags=26%, list=18%, signal=31%
BIOCARTA_HIVNEF_PATHWAY	54	-0.24212296	-0.9381197	0.5980392	0.7020648	1	4689	tags=31%, list=22%, signal=40%
KEGG_PHENYLALANINE_METABOLISM	17	-0.31056052	-0.93488806	0.5643154	0.7084835	1	1924	tags=24%, list=9%, signal=26%
BIOCARTA_ATM_PATHWAY	20	-0.29881644	-0.9296161	0.54761904	0.7194427	1	3774	tags=35%, list=18%, signal=43%
BIOCARTA_CERAMIDE_PATHWAY	20	-0.29478222	-0.9253432	0.5432692	0.72775185	1	3769	tags=25%, list=18%, signal=30%
REACTOME_FACTORS_INVOLVED_IN_MEGAKARYOCYTE_DEVELOPMENT_AND_PLATELET_PRODUCTION	135	-0.2016482	-0.92170864	0.7894737	0.7344121	1	2591	tags=20%, list=12%, signal=23%
REACTOME_GOLGI_ASSOCIATED_VESICLE_BIOGENESIS	55	-0.2330312	-0.9199932	0.6060606	0.7368371	1	6788	tags=42%, list=32%, signal=62%
REACTOME_ELEVATION_OF_CYTOSOLIC_CA2_LEVELS	15	-0.31211385	-0.9174188	0.548	0.7413531	1	1752	tags=27%, list=8%, signal=29%
PID_ERBB4_PATHWAY	38	-0.25259647	-0.91661006	0.5967742	0.74171174	1	1705	tags=16%, list=8%, signal=17%
REACTOME_FGFR2_MUTANT_RECEPTOR_ACTIVATION	29	-0.27033597	-0.9153543	0.6163522	0.7431693	1	4455	tags=48%, list=21%, signal=61%
REACTOME_PKMTS_METHYLATE_HISTONE_LYSINES	41	-0.24497458	-0.9110004	0.6269841	0.7513093	1	5295	tags=41%, list=25%, signal=55%
WP_MIRNA_REGULATION_OF_PROSTATE_CANCER_SIGNALING_PATHWAYS	34	-0.25024864	-0.91079694	0.63265306	0.75032157	1	1770	tags=15%, list=8%, signal=16%
REACTOME_NUCLEOTIDE_CATABOLISM	31	-0.26717395	-0.9075967	0.6496815	0.7558364	1	3475	tags=35%, list=17%, signal=42%
REACTOME_MATURATION_OF_SARS_COV_2_SPIKE_PROTEIN	29	-0.27421132	-0.9058537	0.62371135	0.7581741	1	15191	tags=100%, list=73%, signal=365%
REACTOME_TRANSCRIPTIONAL_REGULATION_BY_VENTX	39	-0.2492151	-0.90444124	0.6392405	0.7598488	1	5184	tags=41%, list=25%, signal=54%
REACTOME_HYALURONAN_METABOLISM	17	-0.30481905	-0.90298384	0.5822222	0.76170343	1	2838	tags=29%, list=14%, signal=34%
REACTOME_METALLOPROTEASE_DUBS	20	-0.28941932	-0.89927673	0.5975104	0.7682266	1	2929	tags=20%, list=14%, signal=23%
REACTOME_ABC_TRANSPORTERS_IN_LIPID_HOMEOSTASIS	18	-0.3056529	-0.89887714	0.5854701	0.767644	1	57	tags=6%, list=0%, signal=6%
REACTOME_RHOG_GTPASE_CYCLE	73	-0.22020231	-0.89777905	0.6666667	0.7685944	1	3598	tags=19%, list=17%, signal=23%
SA_CASPASE_CASCADE	17	-0.30959284	-0.8965448	0.6417323	0.7699937	1	3493	tags=35%, list=17%, signal=42%
REACTOME_CILIUM_ASSEMBLY	190	-0.18727699	-0.8957341	0.8181818	0.7702603	1	3501	tags=21%, list=17%, signal=25%
REACTOME_RHOC_GTPASE_CYCLE	74	-0.21614975	-0.8910509	0.65789473	0.7792281	1	2230	tags=15%, list=11%, signal=17%
REACTOME_ACTIVATION_OF_THE_MRNA_UPON_BINDING_OF_THE_CAP_BINDING_COMPLEX_AND_EIFS_AND_SUBSEQUENT_BINDING_TO_43S	57	-0.22966301	-0.8906812	0.6813187	0.77862	1	16128	tags=100%, list=77%, signal=436%
REACTOME_SELECTIVE_AUTOPHAGY	79	-0.21455286	-0.8881409	0.7717391	0.7827389	1	3488	tags=25%, list=17%, signal=30%
REACTOME_DNA_DOUBLE_STRAND_BREAK_RESPONSE	44	-0.2353288	-0.8864013	0.66917294	0.78508025	1	5795	tags=36%, list=28%, signal=50%
WP_MTHFR_DEFICIENCY	23	-0.28095546	-0.8802717	0.62886596	0.7970935	1	5351	tags=43%, list=26%, signal=58%
REACTOME_TRAF6_MEDIATED_NF_KB_ACTIVATION	24	-0.27178872	-0.87694687	0.6502732	0.8025986	1	3749	tags=29%, list=18%, signal=35%
REACTOME_ONCOGENE_INDUCED_SENESCENCE	32	-0.26030686	-0.87660736	0.68926555	0.80177474	1	5184	tags=28%, list=25%, signal=37%
BIOCARTA_CK1_PATHWAY	15	-0.30972815	-0.87615716	0.59386975	0.80135345	1	5132	tags=47%, list=25%, signal=62%
WP_ONECARBON_METABOLISM_AND_RELATED_PATHWAYS	49	-0.22300765	-0.8721147	0.7711864	0.8085689	1	4008	tags=31%, list=19%, signal=38%
REACTOME_RHOV_GTPASE_CYCLE	37	-0.2380633	-0.8687914	0.68085104	0.814081	1	15948	tags=100%, list=76%, signal=420%
WP_JOUBERT_SYNDROME	72	-0.2134004	-0.86858064	0.80487806	0.81303203	1	5395	tags=25%, list=26%, signal=34%
WP_FATTY_ACID_BIOSYNTHESIS	22	-0.2721424	-0.8674816	0.66831684	0.8138868	1	6172	tags=41%, list=30%, signal=58%
REACTOME_E3_UBIQUITIN_LIGASES_UBIQUITINATE_TARGET_PROTEINS	44	-0.23651575	-0.866451	0.73333335	0.8144046	1	3858	tags=20%, list=18%, signal=25%
BIOCARTA_TNFR1_PATHWAY	29	-0.2498467	-0.8658723	0.64880955	0.814115	1	5127	tags=38%, list=25%, signal=50%
WP_FOLLICLE_STIMULATING_HORMONE_FSH_SIGNALING_PATHWAY	24	-0.26564264	-0.8639623	0.69849247	0.8166488	1	3722	tags=21%, list=18%, signal=25%
BIOCARTA_MTOR_PATHWAY	21	-0.2837765	-0.8619047	0.61928934	0.81942993	1	5732	tags=38%, list=27%, signal=52%
REACTOME_CYTOSOLIC_SULFONATION_OF_SMALL_MOLECULES	22	-0.26770988	-0.8570936	0.7004049	0.8277178	1	865	tags=9%, list=4%, signal=9%
REACTOME_RNA_POLYMERASE_II_TRANSCRIBES_SNRNA_GENES	80	-0.20209089	-0.8565876	0.86538464	0.8272931	1	5722	tags=45%, list=27%, signal=62%
BIOCARTA_CHREBP_PATHWAY	17	-0.28915277	-0.85539037	0.6990741	0.82817656	1	4128	tags=41%, list=20%, signal=51%
REACTOME_RHOJ_GTPASE_CYCLE	55	-0.21995212	-0.85229295	0.8269231	0.83288586	1	4341	tags=24%, list=21%, signal=30%
REACTOME_DEFECTS_IN_VITAMIN_AND_COFACTOR_METABOLISM	19	-0.27483693	-0.85022265	0.73790324	0.83547986	1	2671	tags=26%, list=13%, signal=30%
REACTOME_SUMOYLATION_OF_DNA_METHYLATION_PROTEINS	16	-0.28627628	-0.84724325	0.6666667	0.83967346	1	1339	tags=13%, list=6%, signal=13%
BIOCARTA_TEL_PATHWAY	17	-0.29025534	-0.84632725	0.65909094	0.8398604	1	2887	tags=29%, list=14%, signal=34%
REACTOME_AGGREPHAGY	42	-0.21990909	-0.82942265	0.77483445	0.8703733	1	4506	tags=36%, list=22%, signal=45%
REACTOME_SEMA3A_PAK_DEPENDENT_AXON_REPULSION	16	-0.2834767	-0.8285605	0.70498085	0.8703536	1	5952	tags=50%, list=28%, signal=70%
REACTOME_INTRA_GOLGI_AND_RETROGRADE_GOLGI_TO_ER_TRAFFIC	196	-0.17110294	-0.82833844	1.0	0.86918706	1	5377	tags=28%, list=26%, signal=37%
WP_ANDROGEN_RECEPTOR_SIGNALING_PATHWAY	85	-0.18679513	-0.82741976	0.8541667	0.86920565	1	1225	tags=7%, list=6%, signal=7%
REACTOME_UPTAKE_AND_ACTIONS_OF_BACTERIAL_TOXINS	29	-0.24136001	-0.8235108	0.76397514	0.874595	1	3757	tags=24%, list=18%, signal=29%
WP_INTERACTOME_OF_POLYCOMB_REPRESSIVE_COMPLEX_2_PRC2	16	-0.28629893	-0.8209407	0.6909871	0.87763184	1	6158	tags=56%, list=29%, signal=80%
REACTOME_REGULATION_OF_TP53_ACTIVITY_THROUGH_METHYLATION	19	-0.27132294	-0.8187669	0.7387755	0.87986535	1	5184	tags=42%, list=25%, signal=56%
REACTOME_SYNTHESIS_OF_PIPS_AT_THE_GOLGI_MEMBRANE	18	-0.26979825	-0.81760645	0.71369296	0.8803329	1	7143	tags=56%, list=34%, signal=84%
REACTOME_TRIGLYCERIDE_CATABOLISM	20	-0.26760024	-0.81131846	0.71938777	0.89003754	1	2521	tags=25%, list=12%, signal=28%
PID_ILK_PATHWAY	44	-0.21249503	-0.81119084	0.84090906	0.8886703	1	1225	tags=14%, list=6%, signal=14%
REACTOME_PERK_REGULATES_GENE_EXPRESSION	31	-0.23100358	-0.80825555	0.76623374	0.89201784	1	3992	tags=35%, list=19%, signal=44%
REACTOME_SYNTHESIS_OF_SUBSTRATES_IN_N_GLYCAN_BIOSYTHESIS	60	-0.20538998	-0.80444485	0.87356323	0.89658403	1	4934	tags=32%, list=24%, signal=41%
REACTOME_TRANSFERRIN_ENDOCYTOSIS_AND_RECYCLING	29	-0.23764014	-0.80198693	0.78723407	0.8991168	1	3337	tags=24%, list=16%, signal=29%
REACTOME_INTERLEUKIN_37_SIGNALING	21	-0.25526652	-0.8010696	0.71929824	0.89899355	1	1028	tags=10%, list=5%, signal=10%
REACTOME_ATF4_ACTIVATES_GENES_IN_RESPONSE_TO_ENDOPLASMIC_RETICULUM_STRESS	27	-0.23020336	-0.8004945	0.76963353	0.8983615	1	3992	tags=37%, list=19%, signal=46%
WP_FERROPTOSIS	62	-0.20268533	-0.79883504	0.8831169	0.8994503	1	2086	tags=16%, list=10%, signal=18%
PID_ERA_GENOMIC_PATHWAY	63	-0.18909042	-0.79316556	0.8552632	0.90686256	1	5322	tags=33%, list=25%, signal=45%
PID_PI3KCI_AKT_PATHWAY	35	-0.22352518	-0.784673	0.7862069	0.9183518	1	7078	tags=49%, list=34%, signal=73%
REACTOME_TRANS_GOLGI_NETWORK_VESICLE_BUDDING	71	-0.18253045	-0.7814787	0.92424244	0.92163616	1	6788	tags=38%, list=32%, signal=56%
REACTOME_SEALING_OF_THE_NUCLEAR_ENVELOPE_NE_BY_ESCRT_III	30	-0.22443645	-0.7812445	0.8210526	0.9203918	1	1913	tags=17%, list=9%, signal=18%
REACTOME_TICAM1_RIP1_MEDIATED_IKK_COMPLEX_RECRUITMENT	19	-0.2459004	-0.77844983	0.8	0.92307615	1	3749	tags=26%, list=18%, signal=32%
REACTOME_POST_CHAPERONIN_TUBULIN_FOLDING_PATHWAY	23	-0.24668184	-0.7737396	0.8317757	0.9278857	1	4908	tags=43%, list=23%, signal=57%
BIOCARTA_BARRESTIN_SRC_PATHWAY	16	-0.2610787	-0.77031	0.8032129	0.93116105	1	188	tags=6%, list=1%, signal=6%
WP_HOSTPATHOGEN_INTERACTION_OF_HUMAN_CORONAVIRUSES_INTERFERON_INDUCTION	33	-0.21824405	-0.7690168	0.87333333	0.9314585	1	4689	tags=36%, list=22%, signal=47%
REACTOME_ZINC_TRANSPORTERS	16	-0.26786673	-0.76875746	0.8031496	0.9302239	1	5680	tags=31%, list=27%, signal=43%
WP_HEMATOPOIETIC_STEM_CELL_GENE_REGULATION_BY_GABP_ALPHABETA_COMPLEX	20	-0.25593257	-0.7674417	0.77375567	0.9305572	1	1339	tags=15%, list=6%, signal=16%
WP_THYROID_STIMULATING_HORMONE_TSH_SIGNALING_PATHWAY	64	-0.18829682	-0.7522374	0.9605263	0.9495852	1	2953	tags=17%, list=14%, signal=20%
REACTOME_IRON_UPTAKE_AND_TRANSPORT	54	-0.19724406	-0.7517864	0.88461536	0.948583	1	3418	tags=26%, list=16%, signal=31%
PID_P75_NTR_PATHWAY	68	-0.18344311	-0.745186	0.9550562	0.9552277	1	1106	tags=7%, list=5%, signal=8%
PID_P53_REGULATION_PATHWAY	59	-0.18481655	-0.74510187	0.9444444	0.95371944	1	5428	tags=31%, list=26%, signal=41%
BIOCARTA_VEGF_PATHWAY	26	-0.22571371	-0.74497706	0.8695652	0.9522701	1	4509	tags=38%, list=22%, signal=49%
REACTOME_CD28_DEPENDENT_PI3K_AKT_SIGNALING	20	-0.23807131	-0.7370815	0.825	0.9600562	1	1489	tags=15%, list=7%, signal=16%
BIOCARTA_NDKDYNAMIN_PATHWAY	17	-0.25095734	-0.7355667	0.8526786	0.96013725	1	6941	tags=41%, list=33%, signal=62%
REACTOME_ENDOSOMAL_SORTING_COMPLEX_REQUIRED_FOR_TRANSPORT_ESCRT	31	-0.21433285	-0.7352742	0.8816568	0.9588742	1	5501	tags=35%, list=26%, signal=48%
REACTOME_SPRY_REGULATION_OF_FGF_SIGNALING	16	-0.24801455	-0.731156	0.83265305	0.96202517	1	15735	tags=100%, list=75%, signal=403%
REACTOME_SIGNALING_BY_FGFR2_IN_DISEASE	39	-0.20116965	-0.7296367	0.8907563	0.9622312	1	4455	tags=36%, list=21%, signal=46%
KEGG_BETA_ALANINE_METABOLISM	19	-0.24854751	-0.72885025	0.8595745	0.96138895	1	2050	tags=21%, list=10%, signal=23%
BIOCARTA_CREB_PATHWAY	21	-0.2285733	-0.7241796	0.84615386	0.9646567	1	5368	tags=33%, list=26%, signal=45%
REACTOME_INTRAFLAGELLAR_TRANSPORT	49	-0.19609907	-0.722452	0.9557522	0.96492857	1	4660	tags=27%, list=22%, signal=34%
REACTOME_TRAF6_MEDIATED_INDUCTION_OF_TAK1_COMPLEX_WITHIN_TLR4_COMPLEX	16	-0.24801455	-0.71576047	0.8666667	0.9702853	1	15735	tags=100%, list=75%, signal=403%
BIOCARTA_IL7_PATHWAY	16	-0.24062362	-0.71522623	0.858871	0.96926975	1	3256	tags=25%, list=16%, signal=30%
REACTOME_RHOB_GTPASE_CYCLE	70	-0.16830647	-0.69365877	1.0	0.9877427	1	2216	tags=11%, list=11%, signal=13%
REACTOME_LDL_CLEARANCE	19	-0.220976	-0.6786657	0.9327731	0.9982229	1	2828	tags=21%, list=14%, signal=24%
PID_TRAIL_PATHWAY	28	-0.20108207	-0.67610127	0.96089387	0.9985067	1	4722	tags=29%, list=23%, signal=37%
WP_PATHOGENIC_ESCHERICHIA_COLI_INFECTION	55	-0.16932951	-0.6667752	0.9791667	1	1	1732	tags=11%, list=8%, signal=12%
KEGG_PATHOGENIC_ESCHERICHIA_COLI_INFECTION	55	-0.16932943	-0.6631375	0.97979796	1	1	1732	tags=11%, list=8%, signal=12%
REACTOME_DOWNREGULATION_OF_ERBB2_SIGNALING	29	-0.19188857	-0.66147184	0.96703297	1	1	4768	tags=31%, list=23%, signal=40%
REACTOME_GROWTH_HORMONE_RECEPTOR_SIGNALING	21	-0.2132324	-0.65408003	0.92116183	1	1	3440	tags=19%, list=16%, signal=23%
REACTOME_INTERLEUKIN_20_FAMILY_SIGNALING	19	-0.21479969	-0.65263546	0.9369369	1	1	2953	tags=21%, list=14%, signal=24%
KEGG_VASOPRESSIN_REGULATED_WATER_REABSORPTION	40	-0.18118346	-0.6508088	0.9863946	1	1	4506	tags=18%, list=22%, signal=22%
PID_ECADHERIN_NASCENT_AJ_PATHWAY	39	-0.17823227	-0.6466088	0.9806452	1	1	6958	tags=38%, list=33%, signal=58%
PID_ARF6_DOWNSTREAM_PATHWAY	15	-0.23150784	-0.6460825	0.92460316	1	1	540	tags=7%, list=3%, signal=7%
REACTOME_CD209_DC_SIGN_SIGNALING	20	-0.2066705	-0.6437327	0.9579439	1	1	16600	tags=100%, list=79%, signal=484%
REACTOME_TAK1_ACTIVATES_NFKB_BY_PHOSPHORYLATION_AND_ACTIVATION_OF_IKKS_COMPLEX	31	-0.18471628	-0.6370459	0.98351645	1	1	3749	tags=23%, list=18%, signal=27%
PID_NCADHERIN_PATHWAY	33	-0.17608534	-0.63501614	0.97402596	1	1	5203	tags=24%, list=25%, signal=32%
KEGG_NICOTINATE_AND_NICOTINAMIDE_METABOLISM	22	-0.191311	-0.6340297	0.9433962	1	1	5413	tags=36%, list=26%, signal=49%
REACTOME_REGULATION_OF_RUNX1_EXPRESSION_AND_ACTIVITY	17	-0.2152217	-0.62068856	0.9558233	1	1	2839	tags=18%, list=14%, signal=20%
REACTOME_RHOF_GTPASE_CYCLE	42	-0.16449036	-0.6194555	0.99285716	1	1	3245	tags=17%, list=16%, signal=20%
REACTOME_ACTIVATED_TAK1_MEDIATES_P38_MAPK_ACTIVATION	23	-0.1906039	-0.6182941	0.92488265	1	1	5535	tags=35%, list=26%, signal=47%
WP_VASOPRESSINREGULATED_WATER_REABSORPTION	40	-0.1680017	-0.6134122	0.99224806	1	1	4506	tags=18%, list=22%, signal=22%
REACTOME_RETROGRADE_TRANSPORT_AT_THE_TRANS_GOLGI_NETWORK	48	-0.1629612	-0.6098752	0.9747899	1	1	17518	tags=100%, list=84%, signal=614%
REACTOME_RIPK1_MEDIATED_REGULATED_NECROSIS	28	-0.17916723	-0.6080756	0.9882353	1	1	4768	tags=32%, list=23%, signal=42%
BIOCARTA_IGF1R_PATHWAY	22	-0.19253787	-0.606294	0.96135265	1	1	6494	tags=41%, list=31%, signal=59%
PID_SMAD2_3PATHWAY	16	-0.204191	-0.5992323	0.9681275	1	1	16651	tags=100%, list=80%, signal=490%
REACTOME_EFFECTS_OF_PIP2_HYDROLYSIS	26	-0.17144871	-0.5874445	0.98507464	1	1	2608	tags=15%, list=12%, signal=18%
REACTOME_FORMATION_OF_THE_BETA_CATENIN_TCF_TRANSACTIVATING_COMPLEX	31	-0.1682433	-0.58702046	0.98214287	1	1	4552	tags=26%, list=22%, signal=33%
PID_LKB1_PATHWAY	47	-0.15420504	-0.5866069	0.99065423	1	1	5615	tags=30%, list=27%, signal=41%
REACTOME_RHOQ_GTPASE_CYCLE	59	-0.1441415	-0.5812891	1.0	1	1	4321	tags=20%, list=21%, signal=26%
REACTOME_MATURATION_OF_SARS_COV_2_NUCLEOPROTEIN	15	-0.2095164	-0.5796038	0.96837944	1	1	2737	tags=20%, list=13%, signal=23%
KEGG_GLYCOSAMINOGLYCAN_BIOSYNTHESIS_KERATAN_SULFATE	15	-0.19418265	-0.5633421	0.9605263	1	1	16860	tags=100%, list=81%, signal=515%
REACTOME_NEGATIVE_REGULATION_OF_MET_ACTIVITY	21	-0.18103199	-0.5612604	0.9710145	1	1	3440	tags=19%, list=16%, signal=23%
REACTOME_SARS_COV_2_INFECTION	71	-0.13268097	-0.55848664	1.0	1	1	18153	tags=100%, list=87%, signal=754%
WP_INTRAFLAGELLAR_TRANSPORT_PROTEINS_BINDING_TO_DYNEIN	24	-0.17320763	-0.55672854	0.9764151	1	1	17300	tags=100%, list=83%, signal=578%
REACTOME_CASPASE_ACTIVATION_VIA_DEATH_RECEPTORS_IN_THE_PRESENCE_OF_LIGAND	15	-0.19006841	-0.53149366	0.98039216	1	1	16946	tags=100%, list=81%, signal=526%
WP_IMMUNE_RESPONSE_TO_TUBERCULOSIS	23	-0.16654702	-0.52887607	0.9946808	1	1	17439	tags=100%, list=83%, signal=601%
WP_NAD_METABOLISM	15	-0.18715017	-0.5280046	0.9927798	1	1	17007	tags=100%, list=81%, signal=534%
REACTOME_DEACTIVATION_OF_THE_BETA_CATENIN_TRANSACTIVATING_COMPLEX	41	-0.133074	-0.5211093	1.0	1	1	6506	tags=39%, list=31%, signal=57%
REACTOME_SARS_COV_1_INFECTION	50	-0.13254744	-0.5161626	1.0	1	1	18153	tags=100%, list=87%, signal=755%
REACTOME_SYNTHESIS_OF_PIPS_AT_THE_EARLY_ENDOSOME_MEMBRANE	16	-0.17443308	-0.51403207	0.98785424	1	1	17273	tags=100%, list=83%, signal=573%
REACTOME_SIGNALING_BY_HIPPO	20	-0.16413054	-0.51040775	0.99572647	1	1	17489	tags=100%, list=84%, signal=609%
REACTOME_TRANSLATION_OF_SARS_COV_2_STRUCTURAL_PROTEINS	49	-0.13254109	-0.50418925	1.0	1	1	18153	tags=100%, list=87%, signal=755%
REACTOME_ACTIVATION_OF_IRF3_IRF7_MEDIATED_BY_TBK1_IKK_EPSILON	17	-0.16775645	-0.4992862	0.9922179	1	1	5565	tags=35%, list=27%, signal=48%
PID_ERBB1_INTERNALIZATION_PATHWAY	41	-0.13423999	-0.49828142	1.0	1	1	1021	tags=5%, list=5%, signal=5%
REACTOME_REGULATION_OF_MECP2_EXPRESSION_AND_ACTIVITY	30	-0.14075068	-0.48064747	0.9937107	1	1	17979	tags=100%, list=86%, signal=711%
WP_TRANSCRIPTION_COFACTORS_SKI_AND_SKIL_PROTEIN_PARTNERS	18	-0.1591866	-0.48046255	1.0	0.99858135	1	17592	tags=100%, list=84%, signal=628%
BIOCARTA_EIF4_PATHWAY	24	-0.14581896	-0.47745585	0.99583334	0.9972411	1	2293	tags=13%, list=11%, signal=14%
PID_CXCR3_PATHWAY	38	-0.13260818	-0.4734962	1.0	0.9959352	1	5535	tags=26%, list=26%, signal=36%
REACTOME_RUNX1_INTERACTS_WITH_CO_FACTORS_WHOSE_PRECISE_EFFECT_ON_RUNX1_TARGETS_IS_NOT_KNOWN	36	-0.13081546	-0.47233292	1.0	0.99445546	1	4092	tags=17%, list=20%, signal=21%
REACTOME_NEGATIVE_REGULATORS_OF_DDX58_IFIH1_SIGNALING	35	-0.12769091	-0.4608713	1.0	0.99357	1	4290	tags=20%, list=21%, signal=25%
PID_AR_TF_PATHWAY	49	-0.1157841	-0.45116746	1.0	0.9924495	1	5599	tags=22%, list=27%, signal=31%
REACTOME_IKK_COMPLEX_RECRUITMENT_MEDIATED_BY_RIP1	23	-0.12829039	-0.42281032	1.0	0.99168825	1	3749	tags=17%, list=18%, signal=21%
