# Supplementary material for: Formal Meta-Analysis of Hypoxic Gene Expression Profiles Reveals a Universal Gene Signature
Source: Biomedicines. 2022 Sep 8;10(9):2229. doi: 10.3390/biomedicines10092229 (PMC9496516; doi:10.3390/biomedicines10092229)
Supplement: Supplementary file 1 [file biomedicines-10-02229-s001.zip › S7_GSEA_UP.csv]

NAME	SIZE	ES	NES	NOM.p.val	FDR.q.val	FWER.p.val	RANK.AT.MAX	LEADING.EDGE
PID_HIF1_TFPATHWAY	65	0.7707975	2.1624193	0	0	0	1748	tags=49%, list=8%, signal=54%
WP_GLYCOLYSIS_AND_GLUCONEOGENESIS	40	0.72026896	1.9377056	0	0.0086794635	0.021	2738	tags=55%, list=13%, signal=63%
REACTOME_COLLAGEN_FORMATION	89	0.66081864	1.9290144	0	0.0076394235	0.028	4153	tags=54%, list=20%, signal=67%
PID_HIF2PATHWAY	33	0.72698134	1.9175332	0	0.007112854	0.035	2525	tags=39%, list=12%, signal=45%
REACTOME_COLLAGEN_BIOSYNTHESIS_AND_MODIFYING_ENZYMES	67	0.6651573	1.9061948	0	0.0083718635	0.052	4068	tags=57%, list=19%, signal=70%
REACTOME_ANTIMICROBIAL_PEPTIDES	30	0.73579144	1.9054759	0	0.0069765523	0.052	2165	tags=37%, list=10%, signal=41%
WP_PHOTODYNAMIC_THERAPYINDUCED_HIF1_SURVIVAL_SIGNALING	36	0.7341788	1.892656	0	0.009137579	0.078	2777	tags=53%, list=13%, signal=61%
REACTOME_ASSEMBLY_OF_ACTIVE_LPL_AND_LIPC_LIPASE_COMPLEXES	17	0.796866	1.8524697	0.0013227513	0.020294359	0.191	316	tags=29%, list=2%, signal=30%
REACTOME_COLLAGEN_DEGRADATION	63	0.6488628	1.8393005	0	0.023643002	0.235	4415	tags=56%, list=21%, signal=70%
REACTOME_ASSEMBLY_OF_COLLAGEN_FIBRILS_AND_OTHER_MULTIMERIC_STRUCTURES	60	0.6549098	1.8379834	0	0.02151523	0.238	4153	tags=55%, list=20%, signal=68%
WP_MIRNA_TARGETS_IN_ECM_AND_MEMBRANE_RECEPTORS	24	0.74754566	1.8322916	0	0.022140577	0.266	4068	tags=75%, list=19%, signal=93%
REACTOME_ECM_PROTEOGLYCANS	75	0.6320064	1.8208077	0	0.024953553	0.314	4415	tags=55%, list=21%, signal=69%
NABA_CORE_MATRISOME	251	0.59065485	1.8157115	0	0.026130673	0.35	4619	tags=49%, list=22%, signal=62%
NABA_COLLAGENS	44	0.6679135	1.8040336	0	0.030913677	0.425	4068	tags=61%, list=19%, signal=76%
REACTOME_KERATINIZATION	75	0.62377435	1.8009086	0	0.030380007	0.442	3489	tags=43%, list=17%, signal=51%
WP_OVERVIEW_OF_PROINFLAMMATORY_AND_PROFIBROTIC_MEDIATORS	70	0.63600606	1.7994919	0	0.029170144	0.453	2843	tags=44%, list=14%, signal=51%
WP_TYPE_I_COLLAGEN_SYNTHESIS_IN_THE_CONTEXT_OF_OSTEOGENESIS_IMPERFECTA	31	0.69095385	1.7934341	0.0011976048	0.031215025	0.489	3298	tags=45%, list=16%, signal=54%
WP_CLEAR_CELL_RENAL_CELL_CARCINOMA_PATHWAYS	83	0.6145398	1.7933904	0	0.029480858	0.489	2479	tags=35%, list=12%, signal=39%
WP_EMBRYONIC_STEM_CELL_PLURIPOTENCY_PATHWAYS	111	0.6056025	1.7904747	0	0.02954958	0.51	2912	tags=25%, list=14%, signal=29%
REACTOME_NCAM1_INTERACTIONS	41	0.66898793	1.784117	0	0.03256069	0.566	4068	tags=59%, list=19%, signal=73%
REACTOME_PLASMA_LIPOPROTEIN_REMODELING	30	0.7000589	1.7823057	0	0.031797685	0.573	4326	tags=60%, list=21%, signal=76%
WP_WNT_SIGNALING_IN_KIDNEY_DISEASE	36	0.6784736	1.7723118	0	0.03658994	0.652	2518	tags=25%, list=12%, signal=28%
REACTOME_COLLAGEN_CHAIN_TRIMERIZATION	44	0.6679132	1.767492	0.0011494253	0.038493436	0.686	4068	tags=61%, list=19%, signal=76%
WP_FAMILIAL_HYPERLIPIDEMIA_TYPE_1	15	0.7985755	1.757852	0.0013386881	0.044026315	0.75	1796	tags=47%, list=9%, signal=51%
PID_UPA_UPAR_PATHWAY	40	0.66500473	1.7563977	0	0.043273468	0.758	2295	tags=33%, list=11%, signal=36%
BIOCARTA_IL2_PATHWAY	20	0.736154	1.7532116	0.0025510204	0.044034224	0.776	2569	tags=35%, list=12%, signal=40%
REACTOME_G_BETA_GAMMA_SIGNALLING_THROUGH_PI3KGAMMA	25	0.7151373	1.7424539	0	0.051663157	0.841	190	tags=8%, list=1%, signal=8%
NABA_ECM_GLYCOPROTEINS	177	0.57273877	1.7386656	0	0.053593505	0.861	4690	tags=45%, list=22%, signal=57%
REACTOME_EXTRACELLULAR_MATRIX_ORGANIZATION	291	0.5571748	1.7366576	0	0.053946298	0.871	4415	tags=42%, list=21%, signal=52%
KEGG_TASTE_TRANSDUCTION	37	0.6507521	1.7283351	0.001183432	0.059448168	0.9	5159	tags=57%, list=25%, signal=75%
REACTOME_FORMATION_OF_THE_CORNIFIED_ENVELOPE	66	0.60863435	1.7247277	0	0.060839802	0.911	3051	tags=36%, list=15%, signal=42%
KEGG_INTESTINAL_IMMUNE_NETWORK_FOR_IGA_PRODUCTION	37	0.6486014	1.7241501	0.0011990408	0.059332266	0.912	2600	tags=32%, list=12%, signal=37%
REACTOME_WNT_LIGAND_BIOGENESIS_AND_TRAFFICKING	25	0.70145607	1.7236813	0.0012562814	0.057963267	0.912	980	tags=28%, list=5%, signal=29%
REACTOME_STRIATED_MUSCLE_CONTRACTION	36	0.65538937	1.7223891	0	0.057324387	0.917	4429	tags=53%, list=21%, signal=67%
WP_OREXIN_RECEPTOR_PATHWAY	137	0.57414913	1.7163482	0	0.060733553	0.933	4993	tags=47%, list=24%, signal=62%
WP_STRIATED_MUSCLE_CONTRACTION_PATHWAY	38	0.6487231	1.713455	0	0.061654564	0.94	5549	tags=63%, list=27%, signal=86%
NABA_SECRETED_FACTORS	263	0.55499685	1.7073901	0	0.06608681	0.952	3127	tags=35%, list=15%, signal=41%
REACTOME_NCAM_SIGNALING_FOR_NEURITE_OUT_GROWTH	61	0.60717976	1.7072942	0.0010989011	0.06441021	0.952	4068	tags=44%, list=19%, signal=55%
REACTOME_PLASMA_LIPOPROTEIN_ASSEMBLY_REMODELING_AND_CLEARANCE	65	0.60454047	1.7072921	0.0010940919	0.06275866	0.952	4326	tags=38%, list=21%, signal=48%
REACTOME_INTERLEUKIN_10_SIGNALING	37	0.64427847	1.7068073	0.0011695906	0.061721183	0.952	2600	tags=35%, list=12%, signal=40%
WP_HEREDITARY_LEIOMYOMATOSIS_AND_RENAL_CELL_CARCINOMA_PATHWAY	19	0.70170105	1.7026781	0.0064683054	0.06435146	0.96	636	tags=26%, list=3%, signal=27%
WP_GPCRS_CLASS_B_SECRETINLIKE	21	0.7113097	1.6995102	0.003821656	0.06565672	0.968	3659	tags=48%, list=17%, signal=58%
WP_TGFBETA_RECEPTOR_SIGNALING	54	0.6145172	1.6973097	0	0.06625854	0.971	2584	tags=28%, list=12%, signal=32%
WP_WHITE_FAT_CELL_DIFFERENTIATION	30	0.66336346	1.6800562	0.0036014405	0.08412903	0.989	2683	tags=33%, list=13%, signal=38%
REACTOME_INTEGRIN_CELL_SURFACE_INTERACTIONS	85	0.5788437	1.6779453	0	0.08452203	0.989	4415	tags=52%, list=21%, signal=65%
WP_DEVELOPMENT_AND_HETEROGENEITY_OF_THE_ILC_FAMILY	23	0.68961924	1.6755062	0.007434944	0.08537371	0.991	2714	tags=35%, list=13%, signal=40%
REACTOME_CROSSLINKING_OF_COLLAGEN_FIBRILS	18	0.7248245	1.6743046	0.007884363	0.08486675	0.991	4153	tags=72%, list=20%, signal=90%
BIOCARTA_WNT_PATHWAY	23	0.68717843	1.6696213	0.002484472	0.08875237	0.996	156	tags=9%, list=1%, signal=9%
REACTOME_IMMUNOREGULATORY_INTERACTIONS_BETWEEN_A_LYMPHOID_AND_A_NON_LYMPHOID_CELL	92	0.57177705	1.6672397	0	0.08961157	0.996	4495	tags=46%, list=21%, signal=58%
WP_TGFBETA_RECEPTOR_SIGNALING_IN_SKELETAL_DYSPLASIAS	58	0.59459835	1.6648053	0	0.091192506	0.997	2584	tags=28%, list=12%, signal=31%
REACTOME_CLASS_B_2_SECRETIN_FAMILY_RECEPTORS	84	0.57128346	1.6624125	0.002120891	0.092091784	0.998	3659	tags=33%, list=17%, signal=40%
REACTOME_SENSORY_PERCEPTION_OF_TASTE	36	0.6376167	1.660823	0.0034802784	0.09264166	0.998	3829	tags=44%, list=18%, signal=54%
KEGG_BASAL_CELL_CARCINOMA	54	0.5954463	1.6595695	0.0022172949	0.09235299	0.999	3664	tags=28%, list=18%, signal=34%
WP_ADIPOGENESIS	124	0.55316365	1.6575445	0	0.09336041	0.999	2683	tags=27%, list=13%, signal=31%
REACTOME_DEGRADATION_OF_THE_EXTRACELLULAR_MATRIX	132	0.5516004	1.6558807	0	0.09365809	0.999	5235	tags=47%, list=25%, signal=62%
PID_SHP2_PATHWAY	54	0.59288526	1.6552088	0.0044692736	0.09289993	0.999	4014	tags=37%, list=19%, signal=46%
REACTOME_BLOOD_GROUP_SYSTEMS_BIOSYNTHESIS	20	0.6874986	1.6536596	0.0038412292	0.093165964	1	1913	tags=30%, list=9%, signal=33%
REACTOME_RECYCLING_OF_BILE_ACIDS_AND_SALTS	17	0.7044273	1.6535156	0.015748031	0.09173646	1	1435	tags=24%, list=7%, signal=25%
REACTOME_FOXO_MEDIATED_TRANSCRIPTION	61	0.5813356	1.6482638	0.0010989011	0.097064056	1	3284	tags=31%, list=16%, signal=37%
WP_HYPERTROPHY_MODEL	17	0.70628	1.6409428	0.009296149	0.10554089	1	1550	tags=29%, list=7%, signal=32%
REACTOME_ACTIVATION_OF_MATRIX_METALLOPROTEINASES	27	0.6608936	1.6376686	0.0111524165	0.10830776	1	3409	tags=41%, list=16%, signal=49%
KEGG_GLYCOLYSIS_GLUCONEOGENESIS	54	0.5885283	1.6351597	0.004454343	0.11020074	1	2738	tags=39%, list=13%, signal=45%
KEGG_CYTOKINE_CYTOKINE_RECEPTOR_INTERACTION	198	0.5386173	1.6349542	0	0.108677074	1	2843	tags=31%, list=14%, signal=35%
REACTOME_CELLULAR_HEXOSE_TRANSPORT	19	0.7039039	1.6333729	0.007926024	0.10962658	1	2026	tags=37%, list=10%, signal=41%
WP_OSTEOBLAST_DIFFERENTIATION_AND_RELATED_DISEASES	113	0.5475488	1.6328615	0	0.1086924	1	3719	tags=27%, list=18%, signal=33%
WP_VITAMIN_D_RECEPTOR_PATHWAY	154	0.53466034	1.630629	0	0.1103575	1	3916	tags=35%, list=19%, signal=43%
WP_GLUCOCORTICOID_RECEPTOR_PATHWAY	70	0.576336	1.6305004	0.0032085562	0.108922005	1	3190	tags=36%, list=15%, signal=42%
PID_INTEGRIN1_PATHWAY	66	0.56673414	1.6263855	0.0054229936	0.11360443	1	5235	tags=52%, list=25%, signal=68%
WP_MICROGLIA_PATHOGEN_PHAGOCYTOSIS_PATHWAY	32	0.62426525	1.6218107	0.013064133	0.118611455	1	4315	tags=38%, list=21%, signal=47%
REACTOME_ELASTIC_FIBRE_FORMATION	44	0.5950705	1.6191312	0.008101852	0.121101245	1	5414	tags=50%, list=26%, signal=67%
REACTOME_GLUTAMATE_NEUROTRANSMITTER_RELEASE_CYCLE	24	0.6602599	1.6186213	0.0073439414	0.12025131	1	4215	tags=42%, list=20%, signal=52%
KEGG_GLYCOSPHINGOLIPID_BIOSYNTHESIS_LACTO_AND_NEOLACTO_SERIES	25	0.66211486	1.6172057	0.010088272	0.12060739	1	678	tags=16%, list=3%, signal=17%
KEGG_ALDOSTERONE_REGULATED_SODIUM_REABSORPTION	40	0.60307455	1.6158922	0.008073818	0.120682724	1	4528	tags=35%, list=22%, signal=45%
BIOCARTA_EPO_PATHWAY	19	0.6746008	1.613481	0.0063775512	0.12325936	1	2382	tags=26%, list=11%, signal=30%
REACTOME_METABOLISM_OF_AMINE_DERIVED_HORMONES	15	0.7136053	1.6130947	0.010723861	0.1221419	1	806	tags=33%, list=4%, signal=35%
WP_INFLAMMATORY_RESPONSE_PATHWAY	21	0.6726957	1.6090364	0.011392405	0.12715912	1	4144	tags=48%, list=20%, signal=59%
WP_CELL_MIGRATION_AND_INVASION_THROUGH_P75NTR	30	0.64644504	1.6088582	0.005966587	0.12572281	1	4979	tags=50%, list=24%, signal=66%
REACTOME_NEUROTRANSMITTER_RELEASE_CYCLE	47	0.5843726	1.6086421	0.006833713	0.124495484	1	3423	tags=28%, list=16%, signal=33%
WP_EPO_RECEPTOR_SIGNALING	26	0.6466812	1.6074721	0.00373599	0.12473652	1	2382	tags=23%, list=11%, signal=26%
WP_PLURIPOTENT_STEM_CELL_DIFFERENTIATION_PATHWAY	43	0.5966544	1.6064364	0.005675369	0.124646045	1	2600	tags=35%, list=12%, signal=40%
BIOCARTA_ALK_PATHWAY	36	0.6122308	1.6031877	0.00477327	0.12791668	1	644	tags=11%, list=3%, signal=11%
REACTOME_ACETYLCHOLINE_NEUROTRANSMITTER_RELEASE_CYCLE	15	0.70454925	1.6016357	0.017038008	0.1286188	1	1264	tags=20%, list=6%, signal=21%
WP_MYD88_DISTINCT_INPUTOUTPUT_PATHWAY	17	0.6945779	1.6011385	0.0066577895	0.12794314	1	1347	tags=24%, list=6%, signal=25%
WP_TYPE_2_PAPILLARY_RENAL_CELL_CARCINOMA	33	0.6098827	1.5965616	0.010613208	0.13306877	1	3270	tags=33%, list=16%, signal=39%
WP_ENDOCHONDRAL_OSSIFICATION_WITH_SKELETAL_DYSPLASIAS	61	0.56215185	1.5949296	0.00440044	0.13429664	1	2487	tags=25%, list=12%, signal=28%
REACTOME_G_PROTEIN_BETA_GAMMA_SIGNALLING	32	0.6241851	1.5942341	0.0059101656	0.13395293	1	190	tags=6%, list=1%, signal=6%
REACTOME_NON_INTEGRIN_MEMBRANE_ECM_INTERACTIONS	59	0.5636353	1.5926348	0.004459309	0.1351669	1	4576	tags=47%, list=22%, signal=61%
WP_MATRIX_METALLOPROTEINASES	27	0.63402045	1.5909986	0.010895884	0.13603318	1	3402	tags=41%, list=16%, signal=49%
WP_FOCAL_ADHESION_PI3KAKTMTORSIGNALING_PATHWAY	290	0.5093589	1.5898824	0	0.13643509	1	5240	tags=39%, list=25%, signal=52%
REACTOME_STIMULI_SENSING_CHANNELS	97	0.53587526	1.58719	0.0031712474	0.13988675	1	4106	tags=30%, list=20%, signal=37%
PID_WNT_SIGNALING_PATHWAY	27	0.64123803	1.5863167	0.012484395	0.13957289	1	2518	tags=30%, list=12%, signal=34%
NABA_ECM_AFFILIATED	131	0.52920955	1.5847734	0	0.14059487	1	3868	tags=37%, list=18%, signal=46%
WP_ENDOCHONDRAL_OSSIFICATION	61	0.56215185	1.5837139	0.004381161	0.14090587	1	2487	tags=25%, list=12%, signal=28%
WP_HEMATOPOIETIC_STEM_CELL_DIFFERENTIATION	51	0.5709265	1.5827036	0.0044994378	0.14118402	1	2807	tags=39%, list=13%, signal=45%
WP_BURN_WOUND_HEALING	101	0.53434026	1.5825337	0.0020833334	0.1401294	1	2600	tags=27%, list=12%, signal=30%
PID_AVB3_INTEGRIN_PATHWAY	74	0.5411591	1.5727744	0.0053705694	0.15499121	1	4415	tags=39%, list=21%, signal=49%
REACTOME_INTERLEUKIN_4_AND_INTERLEUKIN_13_SIGNALING	100	0.5300337	1.5724845	0.004166667	0.15392917	1	3577	tags=34%, list=17%, signal=41%
WP_TRANSCRIPTION_FACTOR_REGULATION_IN_ADIPOGENESIS	21	0.6513343	1.5699549	0.022193212	0.1567768	1	5203	tags=48%, list=25%, signal=63%
REACTOME_GLUCONEOGENESIS	30	0.62659603	1.5695268	0.018248174	0.15597291	1	1986	tags=33%, list=9%, signal=37%
REACTOME_TRANSCRIPTIONAL_REGULATION_OF_WHITE_ADIPOCYTE_DIFFERENTIATION	81	0.54255116	1.5689216	0.0031712474	0.15533671	1	2508	tags=17%, list=12%, signal=20%
KEGG_FRUCTOSE_AND_MANNOSE_METABOLISM	30	0.6088906	1.5684946	0.019323671	0.15454122	1	2479	tags=33%, list=12%, signal=38%
REACTOME_CGMP_EFFECTS	15	0.69088763	1.5673257	0.02610966	0.15517765	1	5165	tags=73%, list=25%, signal=97%
REACTOME_NR1H2_AND_NR1H3_MEDIATED_SIGNALING	44	0.5752741	1.5672286	0.011574074	0.15390807	1	2940	tags=23%, list=14%, signal=26%
WP_CORTICOTROPINRELEASING_HORMONE_SIGNALING_PATHWAY	87	0.53216547	1.5637895	0.0031982942	0.15864794	1	4319	tags=30%, list=21%, signal=38%
WP_RAS_AND_BRADYKININ_PATHWAYS_IN_COVID19	27	0.6178818	1.557306	0.019161677	0.16933988	1	2349	tags=30%, list=11%, signal=33%
REACTOME_FOXO_MEDIATED_TRANSCRIPTION_OF_CELL_DEATH_GENES	15	0.6820295	1.549706	0.027559055	0.1820216	1	3669	tags=47%, list=18%, signal=57%
PID_S1P_S1P3_PATHWAY	29	0.60425246	1.5481429	0.021505376	0.18345857	1	3748	tags=31%, list=18%, signal=38%
KEGG_GALACTOSE_METABOLISM	21	0.64186	1.5440954	0.03680203	0.1897194	1	4553	tags=48%, list=22%, signal=61%
REACTOME_CLASS_C_3_METABOTROPIC_GLUTAMATE_PHEROMONE_RECEPTORS	25	0.6300285	1.5434386	0.02093596	0.18920271	1	4235	tags=56%, list=20%, signal=70%
WP_CANONICAL_AND_NONCANONICAL_TGFB_SIGNALING	17	0.6670889	1.5431538	0.029972753	0.18799254	1	5047	tags=53%, list=24%, signal=70%
WP_ZINC_HOMEOSTASIS	34	0.5972149	1.5372096	0.016509434	0.19777577	1	1868	tags=21%, list=9%, signal=23%
WP_AMPLIFICATION_AND_EXPANSION_OF_ONCOGENIC_PATHWAYS_AS_METASTATIC_TRAITS	17	0.6695327	1.536691	0.029294275	0.1971801	1	1815	tags=24%, list=9%, signal=26%
PID_HNF3B_PATHWAY	40	0.5663673	1.5365843	0.025761124	0.19563016	1	2738	tags=28%, list=13%, signal=32%
KEGG_OLFACTORY_TRANSDUCTION	43	0.5681926	1.5363246	0.01594533	0.19443269	1	4247	tags=33%, list=20%, signal=41%
WP_LNCRNA_IN_CANONICAL_WNT_SIGNALING_AND_COLORECTAL_CANCER	91	0.5215932	1.5358344	0.0073917634	0.1938258	1	2518	tags=21%, list=12%, signal=24%
NABA_PROTEOGLYCANS	30	0.6008264	1.5356246	0.020556228	0.19268534	1	4310	tags=53%, list=21%, signal=67%
PID_PDGFRA_PATHWAY	21	0.6441421	1.5337399	0.023779724	0.1950834	1	3482	tags=38%, list=17%, signal=46%
WP_LTF_DANGER_SIGNAL_RESPONSE_PATHWAY	17	0.66201454	1.5312765	0.032341525	0.19872133	1	3577	tags=35%, list=17%, signal=43%
WP_GALANIN_RECEPTOR_PATHWAY	18	0.650056	1.5312371	0.025542784	0.19713739	1	5331	tags=61%, list=25%, signal=82%
NABA_ECM_REGULATORS	197	0.49733117	1.5312004	0	0.19558011	1	3525	tags=31%, list=17%, signal=37%
WP_OSX_AND_MIRNAS_IN_TOOTH_DEVELOPMENT	16	0.67032516	1.530379	0.029769959	0.19556694	1	1970	tags=44%, list=9%, signal=48%
BIOCARTA_CDMAC_PATHWAY	16	0.67163277	1.5302225	0.038309116	0.19423583	1	4528	tags=50%, list=22%, signal=64%
KEGG_LEISHMANIA_INFECTION	64	0.5381531	1.5301986	0.011879049	0.19267587	1	4319	tags=34%, list=21%, signal=43%
WP_MONOAMINE_TRANSPORT	30	0.596618	1.5299023	0.03272727	0.19174527	1	1242	tags=27%, list=6%, signal=28%
WP_PI3KAKTMTOR_VITD3_SIGNALING	19	0.6456634	1.5295274	0.036458332	0.19089971	1	2023	tags=21%, list=10%, signal=23%
WP_COMPLEMENT_SYSTEM	85	0.52294177	1.5292368	0.0073917634	0.19001712	1	4683	tags=39%, list=22%, signal=50%
WP_KISSPEPTINKISSPEPTIN_RECEPTOR_SYSTEM_IN_THE_OVARY	37	0.5743644	1.5273362	0.01686747	0.19209738	1	2382	tags=22%, list=11%, signal=24%
REACTOME_NA_CL_DEPENDENT_NEUROTRANSMITTER_TRANSPORTERS	16	0.66982454	1.5255352	0.04027778	0.19388187	1	3082	tags=50%, list=15%, signal=59%
WP_CCL18_SIGNALING_PATHWAY	48	0.5511015	1.5251702	0.01912261	0.19304538	1	2208	tags=29%, list=11%, signal=33%
PID_NFAT_TFPATHWAY	37	0.5774394	1.5235503	0.012850467	0.19479989	1	4230	tags=49%, list=20%, signal=61%
KEGG_HEDGEHOG_SIGNALING_PATHWAY	53	0.55073327	1.5233618	0.00989011	0.19359621	1	3950	tags=26%, list=19%, signal=32%
REACTOME_RESPONSE_TO_ELEVATED_PLATELET_CYTOSOLIC_CA2	124	0.5007412	1.5217663	0.0010245901	0.19507091	1	4840	tags=34%, list=23%, signal=44%
REACTOME_CHEMOKINE_RECEPTORS_BIND_CHEMOKINES	37	0.58969414	1.5162303	0.014002333	0.20454606	1	3000	tags=38%, list=14%, signal=44%
KEGG_TYPE_I_DIABETES_MELLITUS	32	0.59053963	1.5156251	0.020262217	0.20431942	1	3202	tags=38%, list=15%, signal=44%
REACTOME_FOXO_MEDIATED_TRANSCRIPTION_OF_CELL_CYCLE_GENES	17	0.66939473	1.5143994	0.02451613	0.20538832	1	5574	tags=65%, list=27%, signal=88%
KEGG_ASTHMA	19	0.63654894	1.5109764	0.043758042	0.21094193	1	1408	tags=26%, list=7%, signal=28%
KEGG_ECM_RECEPTOR_INTERACTION	83	0.5245761	1.5093359	0.0105152475	0.21303059	1	4466	tags=46%, list=21%, signal=58%
REACTOME_ION_HOMEOSTASIS	53	0.541688	1.5076045	0.014557671	0.21530491	1	5166	tags=40%, list=25%, signal=52%
KEGG_GRAFT_VERSUS_HOST_DISEASE	27	0.5979908	1.5070858	0.03448276	0.21486169	1	3202	tags=41%, list=15%, signal=48%
PID_INTEGRIN3_PATHWAY	42	0.5626766	1.5061523	0.014908257	0.21523088	1	3748	tags=43%, list=18%, signal=52%
BIOCARTA_HDAC_PATHWAY	24	0.6107922	1.5060445	0.036942676	0.2139625	1	4205	tags=33%, list=20%, signal=42%
WP_FAMILIAL_HYPERLIPIDEMIA_TYPE_4	19	0.6326597	1.5032262	0.050065875	0.21827108	1	1841	tags=32%, list=9%, signal=35%
PID_P38_MK2_PATHWAY	21	0.6208235	1.5013232	0.03979461	0.22083648	1	437	tags=10%, list=2%, signal=10%
PID_IL4_2PATHWAY	53	0.5395754	1.5011811	0.020247469	0.21963207	1	3748	tags=34%, list=18%, signal=41%
BIOCARTA_ARENRF2_PATHWAY	18	0.6423271	1.5000489	0.042362	0.22062455	1	1639	tags=28%, list=8%, signal=30%
WP_PROSTAGLANDIN_SIGNALING	27	0.5869891	1.4976758	0.03052503	0.22433224	1	3758	tags=37%, list=18%, signal=45%
REACTOME_TRANSPORT_OF_BILE_SALTS_AND_ORGANIC_ACIDS_METAL_IONS_AND_AMINE_COMPOUNDS	72	0.51910514	1.4968835	0.008686211	0.22450222	1	3514	tags=28%, list=17%, signal=33%
WP_STATIN_INHIBITION_OF_CHOLESTEROL_PRODUCTION	26	0.5950536	1.495928	0.04528764	0.22506493	1	2086	tags=27%, list=10%, signal=30%
WP_PEPTIDE_GPCRS	52	0.5378977	1.4955853	0.019165726	0.2242364	1	3040	tags=29%, list=15%, signal=34%
WP_PI3KAKT_SIGNALING_PATHWAY	306	0.48148918	1.4951704	0	0.22356735	1	5240	tags=38%, list=25%, signal=50%
REACTOME_SENSORY_PERCEPTION	197	0.48651946	1.4943564	0	0.22372678	1	4235	tags=31%, list=20%, signal=39%
REACTOME_GPCR_LIGAND_BINDING	350	0.47938138	1.4941771	0	0.22266488	1	4136	tags=35%, list=20%, signal=43%
WP_NCRNAS_INVOLVED_IN_WNT_SIGNALING_IN_HEPATOCELLULAR_CARCINOMA	82	0.5116072	1.4934921	0.01590668	0.22276491	1	2518	tags=21%, list=12%, signal=23%
PID_EPHA_FWDPATHWAY	33	0.57799935	1.492555	0.022673031	0.22328539	1	1245	tags=15%, list=6%, signal=16%
WP_NUCLEAR_RECEPTORS	37	0.5617097	1.4915129	0.023148147	0.22398227	1	4024	tags=41%, list=19%, signal=50%
REACTOME_ION_CHANNEL_TRANSPORT	168	0.4891798	1.4914066	0.004052685	0.22273333	1	4106	tags=27%, list=20%, signal=33%
REACTOME_G_ALPHA_S_SIGNALLING_EVENTS	111	0.5032675	1.4911319	0.0040983604	0.22187246	1	2607	tags=20%, list=12%, signal=23%
PID_PS1_PATHWAY	43	0.5468718	1.4905902	0.021151586	0.22166134	1	2136	tags=14%, list=10%, signal=16%
REACTOME_SIGNALING_BY_PDGF	58	0.52872264	1.4871498	0.024363233	0.22781366	1	5267	tags=45%, list=25%, signal=60%
REACTOME_IL_6_TYPE_CYTOKINE_RECEPTOR_LIGAND_INTERACTIONS	16	0.6690309	1.485328	0.039042823	0.23060043	1	2584	tags=44%, list=12%, signal=50%
KEGG_MELANOGENESIS	97	0.50540185	1.4848399	0.006256517	0.2301377	1	4985	tags=30%, list=24%, signal=39%
REACTOME_NUCLEAR_RECEPTOR_TRANSCRIPTION_PATHWAY	51	0.5250753	1.4840558	0.041573033	0.23035379	1	4031	tags=37%, list=19%, signal=46%
WP_GENES_CONTROLLING_NEPHROGENESIS	43	0.5481095	1.4826639	0.037671234	0.23173743	1	3387	tags=26%, list=16%, signal=30%
REACTOME_ANCHORING_FIBRIL_FORMATION	15	0.66321975	1.4794728	0.0489418	0.23735082	1	4036	tags=60%, list=19%, signal=74%
PID_S1P_S1P2_PATHWAY	24	0.59639233	1.4794173	0.045177046	0.23603643	1	3379	tags=21%, list=16%, signal=25%
KEGG_FOCAL_ADHESION	197	0.48108312	1.4781318	0	0.23739858	1	5635	tags=40%, list=27%, signal=54%
REACTOME_DEFECTIVE_B4GALT7_CAUSES_EDS_PROGEROID_TYPE	20	0.617012	1.4776773	0.049071617	0.23696427	1	3831	tags=55%, list=18%, signal=67%
WP_EICOSANOID_SYNTHESIS	24	0.5949866	1.4754328	0.044665013	0.24052134	1	1385	tags=29%, list=7%, signal=31%
PID_SYNDECAN_4_PATHWAY	31	0.5802738	1.4750571	0.032911394	0.23998956	1	3487	tags=32%, list=17%, signal=39%
REACTOME_FOXO_MEDIATED_TRANSCRIPTION_OF_OXIDATIVE_STRESS_METABOLIC_AND_NEURONAL_GENES	26	0.5892875	1.4722738	0.038910504	0.24448228	1	5435	tags=46%, list=26%, signal=62%
REACTOME_INTERLEUKIN_6_FAMILY_SIGNALING	23	0.6051492	1.4708707	0.039540816	0.24617507	1	2600	tags=35%, list=12%, signal=40%
KEGG_SYSTEMIC_LUPUS_ERYTHEMATOSUS	43	0.54752266	1.4671776	0.028506272	0.25292268	1	4136	tags=37%, list=20%, signal=46%
REACTOME_POST_TRANSLATIONAL_MODIFICATION_SYNTHESIS_OF_GPI_ANCHORED_PROTEINS	78	0.50621456	1.4669398	0.0074786325	0.25198525	1	3057	tags=26%, list=15%, signal=30%
REACTOME_ADORA2B_MEDIATED_ANTI_INFLAMMATORY_CYTOKINES_PRODUCTION	99	0.49422526	1.4645126	0.01459854	0.25622812	1	2607	tags=20%, list=12%, signal=23%
PID_FRA_PATHWAY	35	0.5637174	1.4641749	0.03309693	0.2555658	1	3760	tags=46%, list=18%, signal=56%
PID_INTEGRIN_A9B1_PATHWAY	24	0.5951034	1.4640838	0.05376344	0.25427526	1	3525	tags=38%, list=17%, signal=45%
PID_CD8_TCR_DOWNSTREAM_PATHWAY	45	0.53097624	1.462625	0.029279279	0.25601393	1	3689	tags=31%, list=18%, signal=38%
WP_LUNG_FIBROSIS	50	0.5297201	1.4620713	0.025641026	0.25575125	1	3577	tags=34%, list=17%, signal=41%
WP_CANCER_IMMUNOTHERAPY_BY_PD1_BLOCKADE	19	0.61774224	1.4618826	0.05836576	0.25481158	1	3581	tags=53%, list=17%, signal=63%
PID_ALK1_PATHWAY	25	0.5819981	1.4582243	0.047381546	0.26204056	1	4458	tags=32%, list=21%, signal=41%
BIOCARTA_CARDIACEGF_PATHWAY	17	0.64296454	1.4581507	0.057366364	0.2607451	1	4528	tags=47%, list=22%, signal=60%
REACTOME_SYNTHESIS_OF_LEUKOTRIENES_LT_AND_EOXINS_EX	20	0.6042908	1.4575034	0.07105263	0.260985	1	3549	tags=45%, list=17%, signal=54%
WP_PATHOGENESIS_OF_SARSCOV2_MEDIATED_BY_NSP9NSP10_COMPLEX	15	0.641536	1.457165	0.073569484	0.26027873	1	4698	tags=73%, list=22%, signal=95%
REACTOME_ARACHIDONIC_ACID_METABOLISM	57	0.51249385	1.4554971	0.028792912	0.26277843	1	2515	tags=26%, list=12%, signal=30%
WP_ARRHYTHMOGENIC_RIGHT_VENTRICULAR_CARDIOMYOPATHY	73	0.5063521	1.4548072	0.023655914	0.2630198	1	7601	tags=62%, list=36%, signal=96%
BIOCARTA_CCR5_PATHWAY	15	0.6420693	1.4545243	0.06368563	0.26221183	1	1151	tags=20%, list=6%, signal=21%
KEGG_ARRHYTHMOGENIC_RIGHT_VENTRICULAR_CARDIOMYOPATHY_ARVC	72	0.5106322	1.4536754	0.022875817	0.26263243	1	7601	tags=63%, list=36%, signal=98%
KEGG_HEMATOPOIETIC_CELL_LINEAGE	68	0.5140426	1.4535607	0.02320442	0.26148316	1	3916	tags=41%, list=19%, signal=50%
BIOCARTA_NKCELLS_PATHWAY	20	0.6126037	1.4520906	0.05144291	0.26350886	1	2773	tags=30%, list=13%, signal=35%
WP_EPITHELIAL_TO_MESENCHYMAL_TRANSITION_IN_COLORECTAL_CANCER	153	0.4804966	1.4490072	0.008179959	0.26943117	1	4499	tags=33%, list=22%, signal=42%
PID_IL8_CXCR1_PATHWAY	26	0.57883966	1.4479921	0.055555556	0.2705563	1	5156	tags=35%, list=25%, signal=46%
REACTOME_NGF_STIMULATED_TRANSCRIPTION	38	0.54268116	1.4476069	0.048780486	0.26997304	1	5049	tags=47%, list=24%, signal=62%
KEGG_NEUROACTIVE_LIGAND_RECEPTOR_INTERACTION	223	0.4673253	1.4467531	0.001002004	0.2706261	1	3052	tags=28%, list=15%, signal=33%
KEGG_CALCIUM_SIGNALING_PATHWAY	166	0.4716108	1.4462652	0.004056795	0.27029645	1	2860	tags=23%, list=14%, signal=27%
KEGG_MAPK_SIGNALING_PATHWAY	248	0.46516132	1.446127	0.002004008	0.26927456	1	4062	tags=27%, list=19%, signal=33%
WP_HAIR_FOLLICLE_DEVELOPMENT_CYTODIFFERENTIATION_PART_3_OF_3	73	0.50176406	1.4455982	0.02583423	0.26912314	1	2461	tags=26%, list=12%, signal=29%
WP_FAMILIAL_HYPERLIPIDEMIA_TYPE_2	15	0.6349664	1.4445683	0.066313	0.27025458	1	1306	tags=20%, list=6%, signal=21%
BIOCARTA_INFLAM_PATHWAY	20	0.6077758	1.4443516	0.056603774	0.26940352	1	3577	tags=45%, list=17%, signal=54%
PID_TCR_CALCIUM_PATHWAY	21	0.61158174	1.44282	0.058139537	0.27184138	1	4205	tags=38%, list=20%, signal=48%
REACTOME_ROS_AND_RNS_PRODUCTION_IN_PHAGOCYTES	32	0.5620359	1.4421123	0.039711192	0.27204007	1	3798	tags=28%, list=18%, signal=34%
REACTOME_MUSCLE_CONTRACTION	191	0.47068927	1.4405272	0.0040241447	0.27452773	1	5166	tags=37%, list=25%, signal=48%
PID_AMB2_NEUTROPHILS_PATHWAY	37	0.54282403	1.44048	0.049411766	0.27328536	1	4683	tags=43%, list=22%, signal=56%
REACTOME_METAL_ION_SLC_TRANSPORTERS	25	0.5780224	1.4378422	0.06188119	0.27816436	1	736	tags=12%, list=4%, signal=12%
PID_AP1_PATHWAY	63	0.49915642	1.4378124	0.028291622	0.27686647	1	4240	tags=43%, list=20%, signal=54%
WP_CYTOKINES_AND_INFLAMMATORY_RESPONSE	18	0.6264558	1.4349809	0.05655527	0.28255305	1	3124	tags=44%, list=15%, signal=52%
WP_ALLOGRAFT_REJECTION	63	0.4943772	1.4335299	0.036105033	0.2849486	1	3577	tags=33%, list=17%, signal=40%
REACTOME_DAP12_INTERACTIONS	33	0.5533105	1.4273614	0.049122807	0.2989659	1	3202	tags=27%, list=15%, signal=32%
WP_SPINAL_CORD_INJURY	107	0.4846438	1.4266915	0.018848168	0.29931363	1	3577	tags=33%, list=17%, signal=39%
WP_RENINANGIOTENSINALDOSTERONE_SYSTEM_RAAS	38	0.5254387	1.426645	0.048808172	0.29799074	1	5049	tags=37%, list=24%, signal=48%
KEGG_NATURAL_KILLER_CELL_MEDIATED_CYTOTOXICITY	99	0.488188	1.4260294	0.02593361	0.29807746	1	5705	tags=41%, list=27%, signal=57%
REACTOME_MOLECULES_ASSOCIATED_WITH_ELASTIC_FIBRES	37	0.5420212	1.4243733	0.06035503	0.30072173	1	5414	tags=46%, list=26%, signal=62%
NABA_BASEMENT_MEMBRANES	40	0.53040874	1.4184663	0.052508753	0.31420013	1	6713	tags=65%, list=32%, signal=96%
BIOCARTA_INTEGRIN_PATHWAY	34	0.5399701	1.418302	0.06698003	0.31316993	1	6285	tags=38%, list=30%, signal=55%
PID_ATF2_PATHWAY	55	0.5090421	1.4182079	0.046563193	0.3119794	1	3777	tags=35%, list=18%, signal=42%
WNT_SIGNALING	81	0.48354205	1.4177233	0.036093418	0.311716	1	3486	tags=21%, list=17%, signal=25%
PID_SYNDECAN_1_PATHWAY	46	0.52503186	1.4169149	0.056818184	0.31243452	1	4415	tags=43%, list=21%, signal=55%
REACTOME_NOREPINEPHRINE_NEUROTRANSMITTER_RELEASE_CYCLE	17	0.60972786	1.4161894	0.07610147	0.31296453	1	4215	tags=29%, list=20%, signal=37%
KEGG_HYPERTROPHIC_CARDIOMYOPATHY_HCM	80	0.49351963	1.4143595	0.029220778	0.31640333	1	6322	tags=48%, list=30%, signal=68%
WP_NEURAL_CREST_CELL_MIGRATION_IN_CANCER	43	0.5232153	1.4140936	0.052386496	0.31565738	1	4979	tags=33%, list=24%, signal=43%
REACTOME_HDMS_DEMETHYLATE_HISTONES	23	0.5789805	1.4138631	0.08163265	0.31480253	1	4648	tags=43%, list=22%, signal=56%
KEGG_RENAL_CELL_CARCINOMA	68	0.49230334	1.4111903	0.024731183	0.320268	1	2912	tags=21%, list=14%, signal=24%
WP_MAPK_SIGNALING_PATHWAY	233	0.45824793	1.4102099	0.0010050251	0.32134488	1	4423	tags=27%, list=21%, signal=34%
REACTOME_ANTI_INFLAMMATORY_RESPONSE_FAVOURING_LEISHMANIA_PARASITE_INFECTION	128	0.46992192	1.4086641	0.013499481	0.32409343	1	2607	tags=19%, list=12%, signal=21%
REACTOME_LAMININ_INTERACTIONS	30	0.548888	1.4075233	0.051869724	0.32567835	1	8061	tags=77%, list=39%, signal=125%
REACTOME_SIGNALING_BY_NTRKS	131	0.46717113	1.4069893	0.016460905	0.3256399	1	5049	tags=34%, list=24%, signal=44%
WP_IL9_SIGNALING_PATHWAY	16	0.61548585	1.405531	0.085365854	0.32810152	1	2569	tags=19%, list=12%, signal=21%
BIOCARTA_AMI_PATHWAY	19	0.5882252	1.4049621	0.08443272	0.32813972	1	5226	tags=68%, list=25%, signal=91%
WP_ONCOSTATIN_M_SIGNALING_PATHWAY	63	0.49231502	1.4049305	0.040948275	0.32678705	1	4528	tags=29%, list=22%, signal=36%
WP_MIRNAS_INVOLVEMENT_IN_THE_IMMUNE_RESPONSE_IN_SEPSIS	36	0.53475446	1.4043086	0.06698003	0.32703337	1	4376	tags=36%, list=21%, signal=46%
KEGG_NITROGEN_METABOLISM	20	0.59249926	1.4041588	0.089238845	0.32601988	1	3048	tags=30%, list=15%, signal=35%
REACTOME_G_ALPHA_I_SIGNALLING_EVENTS	256	0.45549542	1.4011616	0.0030181087	0.3322534	1	4235	tags=30%, list=20%, signal=37%
WP_ANGIOGENESIS	24	0.5652614	1.4002019	0.08457711	0.33335966	1	2726	tags=29%, list=13%, signal=33%
WP_PHOSPHODIESTERASES_IN_NEURONAL_FUNCTION	52	0.5097489	1.3995739	0.041666668	0.33351707	1	2860	tags=23%, list=14%, signal=27%
REACTOME_PEPTIDE_LIGAND_BINDING_RECEPTORS	143	0.45997742	1.3980693	0.014256619	0.3361692	1	3720	tags=34%, list=18%, signal=41%
BIOCARTA_INTRINSIC_PATHWAY	21	0.57690895	1.3967613	0.07653701	0.3382962	1	3998	tags=52%, list=19%, signal=65%
REACTOME_TP53_REGULATES_TRANSCRIPTION_OF_CELL_DEATH_GENES	41	0.5214327	1.3959724	0.066285715	0.33908802	1	2661	tags=20%, list=13%, signal=22%
PID_CMYB_PATHWAY	75	0.49059415	1.3957708	0.028938906	0.3382396	1	1613	tags=16%, list=8%, signal=17%
WP_GPR143_IN_MELANOCYTES_AND_RETINAL_PIGMENT_EPITHELIUM_CELLS	29	0.5470562	1.3943698	0.072376356	0.34061047	1	5812	tags=38%, list=28%, signal=52%
REACTOME_A_TETRASACCHARIDE_LINKER_SEQUENCE_IS_REQUIRED_FOR_GAG_SYNTHESIS	26	0.5576598	1.3943369	0.10062893	0.33925116	1	3831	tags=46%, list=18%, signal=56%
REACTOME_NUCLEAR_EVENTS_KINASE_AND_TRANSCRIPTION_FACTOR_ACTIVATION	60	0.49929255	1.394064	0.048780486	0.3385012	1	5049	tags=38%, list=24%, signal=50%
REACTOME_CARDIAC_CONDUCTION	123	0.46443036	1.3938745	0.01975052	0.33760732	1	5166	tags=37%, list=25%, signal=49%
REACTOME_REGULATION_OF_INSULIN_LIKE_GROWTH_FACTOR_IGF_TRANSPORT_AND_UPTAKE_BY_INSULIN_LIKE_GROWTH_FACTOR_BINDING_PROTEINS_IGFBPS	110	0.47233862	1.392935	0.022869023	0.33884314	1	7557	tags=62%, list=36%, signal=96%
REACTOME_MET_ACTIVATES_PTK2_SIGNALING	30	0.53646636	1.3927585	0.07626076	0.33788675	1	4068	tags=40%, list=19%, signal=50%
WP_WNT_SIGNALING	109	0.46872488	1.3914922	0.021806853	0.33976343	1	3689	tags=22%, list=18%, signal=27%
WP_PROSTAGLANDIN_AND_LEUKOTRIENE_METABOLISM_IN_SENESCENCE	31	0.5416927	1.3897624	0.07442977	0.3429944	1	2211	tags=26%, list=11%, signal=29%
REACTOME_SLC_MEDIATED_TRANSMEMBRANE_TRANSPORT	225	0.45241937	1.3894217	0.0020140987	0.34254223	1	3592	tags=24%, list=17%, signal=29%
REACTOME_COMPLEMENT_CASCADE	47	0.50836974	1.3893895	0.05071665	0.3412416	1	4136	tags=40%, list=20%, signal=50%
KEGG_DORSO_VENTRAL_AXIS_FORMATION	23	0.5703853	1.3872607	0.06625767	0.34551093	1	3989	tags=35%, list=19%, signal=43%
REACTOME_SIGNAL_TRANSDUCTION_BY_L1	21	0.57801104	1.3869267	0.10969388	0.3449821	1	6210	tags=52%, list=30%, signal=74%
REACTOME_PLATELET_CALCIUM_HOMEOSTASIS	27	0.5462531	1.3858256	0.086741015	0.3465016	1	1089	tags=15%, list=5%, signal=16%
REACTOME_PHASE_2_PLATEAU_PHASE	15	0.6139355	1.3854327	0.11051213	0.34613606	1	6500	tags=73%, list=31%, signal=106%
WP_DNA_DAMAGE_RESPONSE_ONLY_ATM_DEPENDENT	107	0.4658236	1.3853382	0.023858922	0.34500358	1	2691	tags=18%, list=13%, signal=20%
REACTOME_CHONDROITIN_SULFATE_BIOSYNTHESIS	19	0.59203005	1.3846796	0.095430106	0.34529918	1	4907	tags=53%, list=23%, signal=69%
REACTOME_CELL_SURFACE_INTERACTIONS_AT_THE_VASCULAR_WALL	122	0.46077645	1.3819658	0.013457557	0.3512593	1	4462	tags=36%, list=21%, signal=46%
REACTOME_COMMON_PATHWAY_OF_FIBRIN_CLOT_FORMATION	19	0.57495165	1.381728	0.094986804	0.3505062	1	3998	tags=47%, list=19%, signal=59%
REACTOME_GLYCOGEN_METABOLISM	27	0.5468894	1.380883	0.096224114	0.35136348	1	2974	tags=30%, list=14%, signal=34%
REACTOME_INITIAL_TRIGGERING_OF_COMPLEMENT	17	0.5977773	1.3806603	0.10719132	0.35055858	1	4136	tags=76%, list=20%, signal=95%
REACTOME_GLYCOGEN_SYNTHESIS	16	0.61303663	1.3785943	0.10190217	0.3549441	1	2974	tags=38%, list=14%, signal=44%
REACTOME_SIGNALING_BY_ACTIVIN	15	0.60114634	1.3749228	0.11486486	0.36305746	1	3568	tags=40%, list=17%, signal=48%
REACTOME_MET_PROMOTES_CELL_MOTILITY	41	0.5126615	1.3725666	0.06713781	0.36788222	1	4306	tags=37%, list=21%, signal=46%
BIOCARTA_SPRY_PATHWAY	17	0.59457254	1.3715432	0.10574412	0.36931914	1	2382	tags=24%, list=11%, signal=27%
KEGG_DILATED_CARDIOMYOPATHY	87	0.47194844	1.370208	0.046709128	0.37159184	1	6322	tags=45%, list=30%, signal=64%
KEGG_PRIMARY_IMMUNODEFICIENCY	28	0.5400361	1.3681628	0.102372035	0.37598345	1	3632	tags=43%, list=17%, signal=52%
WP_AGERAGE_PATHWAY	64	0.4876328	1.3673558	0.059471365	0.37680626	1	5055	tags=33%, list=24%, signal=43%
WP_INTRACELLULAR_TRAFFICKING_PROTEINS_INVOLVED_IN_CMT_NEUROPATHY	27	0.5454464	1.3672552	0.07920792	0.37561652	1	1264	tags=11%, list=6%, signal=12%
KEGG_PROXIMAL_TUBULE_BICARBONATE_RECLAMATION	23	0.5616069	1.367169	0.08695652	0.37444466	1	2949	tags=26%, list=14%, signal=30%
WP_PHOTODYNAMIC_THERAPYINDUCED_NFKB_SURVIVAL_SIGNALING	33	0.52696145	1.3661538	0.08854782	0.37579292	1	4376	tags=45%, list=21%, signal=57%
WP_FOCAL_ADHESION	197	0.44292367	1.3660517	0.012048192	0.37464398	1	5635	tags=37%, list=27%, signal=50%
PID_IL8_CXCR2_PATHWAY	33	0.5267394	1.3651912	0.09580839	0.3756202	1	4810	tags=27%, list=23%, signal=35%
WP_NEURAL_CREST_CELL_MIGRATION_DURING_DEVELOPMENT	40	0.5114805	1.3644843	0.06485849	0.37623164	1	4979	tags=33%, list=24%, signal=43%
WP_EICOSANOID_METABOLISM_VIA_LIPOOXYGENASES_LOX	28	0.5430757	1.3624808	0.07936508	0.38042554	1	2383	tags=21%, list=11%, signal=24%
REACTOME_SYNTHESIS_SECRETION_AND_DEACYLATION_OF_GHRELIN	16	0.5994326	1.3615364	0.11827957	0.381775	1	1704	tags=25%, list=8%, signal=27%
WP_NICOTINE_EFFECT_ON_DOPAMINERGIC_NEURONS	20	0.5754228	1.3612044	0.0927835	0.38128757	1	1526	tags=25%, list=7%, signal=27%
REACTOME_OTHER_SEMAPHORIN_INTERACTIONS	17	0.58164304	1.3609167	0.10978836	0.38072753	1	1500	tags=18%, list=7%, signal=19%
REACTOME_SYNDECAN_INTERACTIONS	27	0.5413788	1.3608297	0.09756097	0.3795784	1	4528	tags=48%, list=22%, signal=61%
BIOCARTA_TFF_PATHWAY	23	0.5679328	1.3585458	0.09577114	0.3844377	1	2757	tags=22%, list=13%, signal=25%
WP_GPCRS_CLASS_A_RHODOPSINLIKE	161	0.44837978	1.357269	0.024415055	0.38646358	1	3093	tags=25%, list=15%, signal=29%
WP_REGULATION_OF_ACTIN_CYTOSKELETON	144	0.450173	1.3562824	0.025458248	0.38768378	1	6349	tags=35%, list=30%, signal=51%
WP_SEROTONIN_RECEPTOR_467_AND_NR3C_SIGNALING	19	0.5753696	1.3561432	0.105058365	0.38671064	1	5924	tags=37%, list=28%, signal=51%
WP_PKCGAMMA_CALCIUM_SIGNALING_PATHWAY_IN_ATAXIA	22	0.54465973	1.3550897	0.11055901	0.38832188	1	2529	tags=32%, list=12%, signal=36%
REACTOME_SENSORY_PROCESSING_OF_SOUND_BY_OUTER_HAIR_CELLS_OF_THE_COCHLEA	51	0.48573092	1.3546543	0.06853933	0.3881964	1	3171	tags=27%, list=15%, signal=32%
PID_PTP1B_PATHWAY	49	0.49485758	1.3509936	0.07968575	0.39727074	1	2473	tags=24%, list=12%, signal=28%
KEGG_TGF_BETA_SIGNALING_PATHWAY	82	0.46357673	1.3505728	0.05479452	0.39704058	1	3122	tags=22%, list=15%, signal=26%
BIOCARTA_IL1R_PATHWAY	29	0.52820045	1.3496515	0.099378884	0.39816362	1	2600	tags=24%, list=12%, signal=28%
WP_GLYCOGEN_SYNTHESIS_AND_DEGRADATION	39	0.5094466	1.3494334	0.09822485	0.39741734	1	2904	tags=26%, list=14%, signal=30%
REACTOME_BILE_ACID_AND_BILE_SALT_METABOLISM	42	0.5021688	1.3487101	0.08181818	0.39810163	1	1534	tags=14%, list=7%, signal=15%
WP_INTERACTIONS_BETWEEN_IMMUNE_CELLS_AND_MICRORNAS_IN_TUMOR_MICROENVIRONMENT	25	0.54591185	1.3485014	0.11111111	0.39737108	1	2492	tags=24%, list=12%, signal=27%
WP_HEART_DEVELOPMENT	43	0.5005348	1.348139	0.06993007	0.39706182	1	4724	tags=30%, list=23%, signal=39%
KEGG_AXON_GUIDANCE	127	0.45186153	1.3480532	0.04213772	0.39592826	1	4807	tags=26%, list=23%, signal=34%
PID_ARF6_PATHWAY	33	0.51761097	1.347992	0.08455882	0.39474508	1	3808	tags=30%, list=18%, signal=37%
WP_DEREGULATION_OF_RAB_AND_RAB_EFFECTOR_GENES_IN_BLADDER_CANCER	16	0.5920808	1.347946	0.09882965	0.39352676	1	6161	tags=63%, list=29%, signal=89%
REACTOME_CLASS_A_1_RHODOPSIN_LIKE_RECEPTORS	242	0.4395989	1.3467382	0.0050301813	0.39536473	1	4136	tags=33%, list=20%, signal=41%
WP_VITAMIN_B12_METABOLISM	43	0.5043189	1.3462245	0.07981756	0.39546528	1	5806	tags=47%, list=28%, signal=64%
WP_INTERACTIONS_OF_NATURAL_KILLER_CELLS_IN_PANCREATIC_CANCER	20	0.5720486	1.34612	0.1010101	0.39441854	1	2062	tags=25%, list=10%, signal=28%
KEGG_TYPE_II_DIABETES_MELLITUS	44	0.49827802	1.345915	0.090191655	0.39364263	1	2738	tags=27%, list=13%, signal=31%
REACTOME_SENSORY_PROCESSING_OF_SOUND	71	0.47100207	1.3456271	0.06318083	0.39308783	1	3171	tags=24%, list=15%, signal=28%
SA_B_CELL_RECEPTOR_COMPLEXES	24	0.54486656	1.3456119	0.10062112	0.3917855	1	6369	tags=46%, list=30%, signal=66%
REACTOME_ION_TRANSPORT_BY_P_TYPE_ATPASES	51	0.48831514	1.345475	0.079596415	0.39083546	1	5681	tags=39%, list=27%, signal=54%
PID_TXA2PATHWAY	54	0.4795237	1.3444484	0.07419712	0.3923276	1	2072	tags=15%, list=10%, signal=16%
REACTOME_SIGNALING_BY_TYPE_1_INSULIN_LIKE_GROWTH_FACTOR_1_RECEPTOR_IGF1R	50	0.49002218	1.3432251	0.07069556	0.3944461	1	3646	tags=28%, list=17%, signal=34%
REACTOME_PLASMA_LIPOPROTEIN_ASSEMBLY	16	0.5909466	1.3393943	0.13108107	0.40377748	1	2086	tags=25%, list=10%, signal=28%
WP_TCELL_ANTIGEN_RECEPTOR_TCR_PATHWAY_DURING_STAPHYLOCOCCUS_AUREUS_INFECTION	55	0.4758751	1.3372629	0.091008775	0.40860203	1	4172	tags=31%, list=20%, signal=39%
WP_CALCIUM_REGULATION_IN_CARDIAC_CELLS	147	0.43846026	1.3352648	0.029501526	0.41281387	1	3945	tags=21%, list=19%, signal=26%
PID_HIF1A_PATHWAY	18	0.5660711	1.3350677	0.12813738	0.41210455	1	1604	tags=17%, list=8%, signal=18%
PID_RXR_VDR_PATHWAY	25	0.5395749	1.3338642	0.109068625	0.41429615	1	4031	tags=40%, list=19%, signal=49%
REACTOME_RET_SIGNALING	38	0.50335556	1.33355	0.108545035	0.41373888	1	4762	tags=39%, list=23%, signal=51%
KEGG_PENTOSE_PHOSPHATE_PATHWAY	24	0.54525316	1.3333739	0.11895911	0.41280973	1	1662	tags=25%, list=8%, signal=27%
BIOCARTA_MAL_PATHWAY	19	0.5620785	1.3329736	0.12483913	0.4126552	1	52	tags=5%, list=0%, signal=5%
REACTOME_SIGNALING_BY_ERYTHROPOIETIN	25	0.54264957	1.3305237	0.12219451	0.4181972	1	4315	tags=32%, list=21%, signal=40%
WP_NOTCH1_REGULATION_OF_ENDOTHELIAL_CELL_CALCIFICATION	17	0.5855469	1.3305041	0.12285337	0.41690665	1	2366	tags=29%, list=11%, signal=33%
REACTOME_GLYCOLYSIS	68	0.46234187	1.3300776	0.0880088	0.4166992	1	2974	tags=28%, list=14%, signal=32%
WP_TGFBETA_SIGNALING_IN_THYROID_CELLS_FOR_EPITHELIALMESENCHYMAL_TRANSITION	18	0.5746699	1.3295747	0.1392573	0.4167651	1	5047	tags=39%, list=24%, signal=51%
BIOCARTA_NGF_PATHWAY	19	0.5559984	1.3280976	0.13743456	0.41960403	1	2382	tags=21%, list=11%, signal=24%
REACTOME_DISEASES_ASSOCIATED_WITH_GLYCOSAMINOGLYCAN_METABOLISM	40	0.49897692	1.3275111	0.09218203	0.41994572	1	5433	tags=48%, list=26%, signal=64%
REACTOME_VISUAL_PHOTOTRANSDUCTION	86	0.46026808	1.3275082	0.06567796	0.41861755	1	4188	tags=31%, list=20%, signal=39%
KEGG_PATHWAYS_IN_CANCER	314	0.426011	1.3272837	0.006018054	0.41784233	1	4319	tags=27%, list=21%, signal=33%
WP_NEUROINFLAMMATION_AND_GLUTAMATERGIC_SIGNALING	136	0.43717313	1.3265445	0.040733196	0.41861114	1	2860	tags=21%, list=14%, signal=25%
REACTOME_METABOLISM_OF_STEROID_HORMONES	32	0.5152613	1.3259554	0.11660777	0.4188868	1	3423	tags=31%, list=16%, signal=37%
BIOCARTA_PITX2_PATHWAY	16	0.57609487	1.3254727	0.15537849	0.41889802	1	156	tags=6%, list=1%, signal=6%
PID_IL12_2PATHWAY	50	0.48587516	1.3252728	0.10783201	0.41814628	1	3581	tags=28%, list=17%, signal=34%
PID_DELTA_NP63_PATHWAY	46	0.4885323	1.3252314	0.09930716	0.4169567	1	2059	tags=24%, list=10%, signal=26%
REACTOME_GABA_SYNTHESIS_RELEASE_REUPTAKE_AND_DEGRADATION	18	0.57608885	1.3246002	0.13299233	0.41740122	1	3082	tags=33%, list=15%, signal=39%
REACTOME_SURFACTANT_METABOLISM	24	0.5306184	1.3238547	0.12043796	0.41817266	1	4923	tags=46%, list=24%, signal=60%
WP_NETRINUNC5B_SIGNALING_PATHWAY	50	0.48083052	1.3225679	0.100678734	0.42058566	1	4576	tags=34%, list=22%, signal=43%
WP_SELECTIVE_EXPRESSION_OF_CHEMOKINE_RECEPTORS_DURING_TCELL_POLARIZATION	18	0.5598762	1.3212737	0.122395836	0.42296207	1	3124	tags=28%, list=15%, signal=33%
BIOCARTA_HIF_PATHWAY	15	0.58704555	1.320898	0.14526589	0.42276022	1	1151	tags=27%, list=6%, signal=28%
KEGG_MATURITY_ONSET_DIABETES_OF_THE_YOUNG	20	0.54981065	1.319072	0.13307494	0.42658094	1	2738	tags=25%, list=13%, signal=29%
REACTOME_GLYCOGEN_STORAGE_DISEASES	15	0.5896947	1.31862	0.13667117	0.4265715	1	1771	tags=27%, list=8%, signal=29%
WP_PURINERGIC_SIGNALING	29	0.5209975	1.318498	0.12224939	0.4256319	1	1089	tags=10%, list=5%, signal=11%
WP_NEOVASCULARISATION_PROCESSES	37	0.504422	1.3177177	0.102923974	0.42666605	1	5047	tags=38%, list=24%, signal=50%
KEGG_ARACHIDONIC_ACID_METABOLISM	50	0.48054224	1.3176368	0.1075028	0.42562473	1	3549	tags=32%, list=17%, signal=38%
BIOCARTA_EICOSANOID_PATHWAY	22	0.54500705	1.3173072	0.14075887	0.42527744	1	2791	tags=36%, list=13%, signal=42%
WP_COMPLEMENT_AND_COAGULATION_CASCADES	53	0.4711625	1.3172393	0.08898777	0.4242132	1	5226	tags=51%, list=25%, signal=68%
WP_NUCLEAR_RECEPTORS_METAPATHWAY	287	0.42766866	1.3170637	0.01002004	0.4234698	1	3201	tags=22%, list=15%, signal=26%
REACTOME_DISEASES_ASSOCIATED_WITH_O_GLYCOSYLATION_OF_PROTEINS	65	0.46185565	1.316993	0.09436008	0.42238733	1	4189	tags=32%, list=20%, signal=40%
PID_RHODOPSIN_PATHWAY	19	0.55657595	1.3168033	0.12796834	0.42169285	1	6643	tags=68%, list=32%, signal=100%
WP_PROXIMAL_TUBULE_TRANSPORT	47	0.4842232	1.3165966	0.098987624	0.42101935	1	3264	tags=30%, list=16%, signal=35%
BIOCARTA_INSULIN_PATHWAY	21	0.5430375	1.3164053	0.12093628	0.42029947	1	2382	tags=19%, list=11%, signal=21%
WP_IL2_SIGNALING_PATHWAY	40	0.48924258	1.3159084	0.11737089	0.4204539	1	2691	tags=23%, list=13%, signal=26%
REACTOME_CARGO_CONCENTRATION_IN_THE_ER	32	0.508811	1.3153092	0.12530413	0.4208851	1	4104	tags=28%, list=20%, signal=35%
REACTOME_OTHER_INTERLEUKIN_SIGNALING	23	0.53714544	1.3138261	0.13299875	0.42390102	1	3627	tags=26%, list=17%, signal=32%
PID_IL27_PATHWAY	21	0.5514503	1.3129599	0.13899614	0.42506307	1	2600	tags=24%, list=12%, signal=27%
WP_CANONICAL_AND_NONCANONICAL_NOTCH_SIGNALING	27	0.5242631	1.3126173	0.12931034	0.42473507	1	4251	tags=48%, list=20%, signal=60%
BIOCARTA_NKT_PATHWAY	17	0.5678945	1.3108172	0.1486842	0.42852324	1	3124	tags=29%, list=15%, signal=35%
REACTOME_DISASSEMBLY_OF_THE_DESTRUCTION_COMPLEX_AND_RECRUITMENT_OF_AXIN_TO_THE_MEMBRANE	30	0.5152328	1.3100922	0.12379808	0.4292995	1	2992	tags=17%, list=14%, signal=19%
WP_SIGNAL_TRANSDUCTION_THROUGH_IL1R	31	0.5178205	1.3097737	0.12622549	0.428948	1	2600	tags=23%, list=12%, signal=26%
REACTOME_EPHA_MEDIATED_GROWTH_CONE_COLLAPSE	29	0.51350546	1.3078403	0.13333334	0.43297377	1	5478	tags=38%, list=26%, signal=51%
WP_MIRNA_REGULATION_OF_P53_PATHWAY_IN_PROSTATE_CANCER	24	0.54395574	1.3076746	0.14054726	0.43220124	1	2661	tags=29%, list=13%, signal=33%
WP_TYROBP_CAUSAL_NETWORK_IN_MICROGLIA	56	0.4680678	1.3063781	0.08922742	0.434675	1	5105	tags=41%, list=24%, signal=54%
REACTOME_DOPAMINE_NEUROTRANSMITTER_RELEASE_CYCLE	23	0.532237	1.3060064	0.15549937	0.4345887	1	6996	tags=48%, list=33%, signal=72%
REACTOME_SUMOYLATION_OF_INTRACELLULAR_RECEPTORS	29	0.5107252	1.3052502	0.12991656	0.43542987	1	4024	tags=31%, list=19%, signal=38%
WP_WNT_SIGNALING_PATHWAY_AND_PLURIPOTENCY	102	0.44110525	1.3014213	0.07732497	0.44504207	1	4073	tags=23%, list=19%, signal=28%
WP_P53_TRANSCRIPTIONAL_GENE_NETWORK	65	0.45492032	1.300006	0.1058952	0.44787562	1	4941	tags=37%, list=24%, signal=48%
REACTOME_TRANSMISSION_ACROSS_CHEMICAL_SYNAPSES	251	0.4228707	1.2990597	0.018090453	0.4492255	1	4046	tags=24%, list=19%, signal=29%
WP_MYOMETRIAL_RELAXATION_AND_CONTRACTION_PATHWAYS	150	0.4314727	1.2976241	0.04587156	0.45210722	1	5331	tags=29%, list=25%, signal=39%
REACTOME_RUNX2_REGULATES_OSTEOBLAST_DIFFERENTIATION	23	0.5192362	1.2957072	0.14625	0.4564675	1	5844	tags=43%, list=28%, signal=60%
PID_RAS_PATHWAY	29	0.5066861	1.2952212	0.14522293	0.45663345	1	6285	tags=55%, list=30%, signal=79%
WP_TCELL_RECEPTOR_TCR_SIGNALING_PATHWAY	84	0.4456408	1.2947595	0.08945687	0.4567246	1	5478	tags=38%, list=26%, signal=51%
WP_PHYSIOLOGICAL_AND_PATHOLOGICAL_HYPERTROPHY_OF_THE_HEART	25	0.526094	1.2946934	0.15384616	0.4555952	1	3689	tags=24%, list=18%, signal=29%
REACTOME_DEFECTIVE_C1GALT1C1_CAUSES_TNPS	15	0.5781185	1.2926532	0.16216215	0.4603623	1	2372	tags=40%, list=11%, signal=45%
KEGG_ALLOGRAFT_REJECTION	25	0.5291899	1.2918764	0.16831683	0.4611691	1	3202	tags=32%, list=15%, signal=38%
REACTOME_AMINE_LIGAND_BINDING_RECEPTORS	32	0.5008736	1.2918452	0.14336494	0.45997804	1	2639	tags=34%, list=13%, signal=39%
REACTOME_NITRIC_OXIDE_STIMULATES_GUANYLATE_CYCLASE	21	0.5348161	1.2916065	0.16985951	0.45933455	1	5165	tags=57%, list=25%, signal=76%
WP_MAMMARY_GLAND_DEVELOPMENT_PATHWAY_EMBRYONIC_DEVELOPMENT_STAGE_1_OF_4	15	0.5712863	1.2912607	0.16460906	0.45902583	1	2678	tags=33%, list=13%, signal=38%
REACTOME_SEROTONIN_NEUROTRANSMITTER_RELEASE_CYCLE	18	0.5668423	1.2906401	0.15494792	0.4595691	1	4215	tags=28%, list=20%, signal=35%
REACTOME_PLATELET_ACTIVATION_SIGNALING_AND_AGGREGATION	248	0.4174876	1.2904634	0.03109328	0.4588176	1	5506	tags=30%, list=26%, signal=40%
BIOCARTA_IL6_PATHWAY	21	0.53841585	1.2902958	0.17335059	0.45804256	1	2600	tags=24%, list=12%, signal=27%
REACTOME_GLUCOSE_METABOLISM	85	0.44269034	1.290034	0.08604407	0.4574912	1	2158	tags=20%, list=10%, signal=22%
KEGG_REGULATION_OF_ACTIN_CYTOSKELETON	204	0.4212918	1.2899327	0.033165827	0.4565316	1	6349	tags=35%, list=30%, signal=49%
BIOCARTA_FMLP_PATHWAY	34	0.49435896	1.2868165	0.15070094	0.4644887	1	4319	tags=26%, list=21%, signal=33%
WP_SYNAPTIC_VESICLE_PATHWAY	50	0.46280414	1.2863325	0.14269663	0.46462727	1	1264	tags=12%, list=6%, signal=13%
KEGG_AUTOIMMUNE_THYROID_DISEASE	27	0.51518786	1.284744	0.1421508	0.4680234	1	3202	tags=33%, list=15%, signal=39%
WP_NUCLEOTIDEBINDING_OLIGOMERIZATION_DOMAIN_NOD_PATHWAY	38	0.48750344	1.2829293	0.13856813	0.47209248	1	1107	tags=11%, list=5%, signal=11%
WP_OVERVIEW_OF_NANOPARTICLE_EFFECTS	17	0.5606733	1.2820382	0.1664393	0.4735191	1	4979	tags=59%, list=24%, signal=77%
KEGG_PPAR_SIGNALING_PATHWAY	61	0.45615757	1.2817396	0.10745614	0.47320715	1	2579	tags=16%, list=12%, signal=19%
PID_INTEGRIN2_PATHWAY	27	0.5157141	1.2810168	0.15621156	0.47399983	1	4136	tags=52%, list=20%, signal=65%
KEGG_JAK_STAT_SIGNALING_PATHWAY	117	0.43061766	1.2793971	0.08138352	0.47754523	1	2600	tags=19%, list=12%, signal=21%
WP_THYROID_HORMONES_PRODUCTION_AND_PERIPHERAL_DOWNSTREAM_SIGNALING_EFFECTS	90	0.43652344	1.2793012	0.098752595	0.47655272	1	3129	tags=17%, list=15%, signal=20%
PID_IL23_PATHWAY	28	0.5113189	1.2788576	0.1535671	0.4766953	1	4319	tags=29%, list=21%, signal=36%
REACTOME_TERMINATION_OF_O_GLYCAN_BIOSYNTHESIS	21	0.5310345	1.2784189	0.17171717	0.4767354	1	2372	tags=29%, list=11%, signal=32%
REACTOME_PYRUVATE_METABOLISM	30	0.50562316	1.2769531	0.16405308	0.47973537	1	2259	tags=20%, list=11%, signal=22%
WP_VITAMIN_A_AND_CAROTENOID_METABOLISM	41	0.4739163	1.2756854	0.13901345	0.48213214	1	4174	tags=32%, list=20%, signal=40%
PID_P38_ALPHA_BETA_DOWNSTREAM_PATHWAY	38	0.48110035	1.2750818	0.16685846	0.48262477	1	2619	tags=21%, list=13%, signal=24%
WP_BREAST_CANCER_PATHWAY	145	0.420114	1.274718	0.06454918	0.48245487	1	2518	tags=18%, list=12%, signal=20%
WP_DIFFERENTIATION_OF_WHITE_AND_BROWN_ADIPOCYTE	24	0.5222291	1.2744261	0.18271606	0.48213154	1	2986	tags=33%, list=14%, signal=39%
REACTOME_PYROPTOSIS	24	0.5175848	1.2730056	0.16646115	0.48507816	1	579	tags=8%, list=3%, signal=9%
PID_IL12_STAT4_PATHWAY	24	0.5186626	1.2719282	0.19029851	0.48684925	1	3597	tags=29%, list=17%, signal=35%
KEGG_ADIPOCYTOKINE_SIGNALING_PATHWAY	63	0.4512902	1.2713913	0.11135612	0.48720628	1	4319	tags=24%, list=21%, signal=30%
REACTOME_UNBLOCKING_OF_NMDA_RECEPTORS_GLUTAMATE_BINDING_AND_ACTIVATION	21	0.5236273	1.2705489	0.17193426	0.48845777	1	3485	tags=33%, list=17%, signal=40%
KEGG_LEUKOCYTE_TRANSENDOTHELIAL_MIGRATION	111	0.42884415	1.2702551	0.08695652	0.48811287	1	4528	tags=30%, list=22%, signal=38%
REACTOME_THROMBOXANE_SIGNALLING_THROUGH_TP_RECEPTOR	24	0.51759434	1.2694751	0.16461916	0.48926196	1	2072	tags=13%, list=10%, signal=14%
REACTOME_MYOGENESIS	27	0.50199974	1.269362	0.16971917	0.4882996	1	4807	tags=26%, list=23%, signal=34%
PID_INTEGRIN_CS_PATHWAY	26	0.5068213	1.268696	0.16287425	0.48907402	1	7478	tags=73%, list=36%, signal=114%
REACTOME_GPVI_MEDIATED_ACTIVATION_CASCADE	34	0.49406332	1.2673708	0.14883721	0.49193102	1	4289	tags=26%, list=21%, signal=33%
WP_PPAR_SIGNALING_PATHWAY	59	0.45729226	1.2668694	0.1335505	0.49214497	1	4508	tags=25%, list=22%, signal=32%
KEGG_COMPLEMENT_AND_COAGULATION_CASCADES	60	0.45126933	1.2664316	0.14891304	0.4922052	1	5226	tags=48%, list=25%, signal=64%
WP_BRAINDERIVED_NEUROTROPHIC_FACTOR_BDNF_SIGNALING_PATHWAY	143	0.41860896	1.2649667	0.06517312	0.49536145	1	4319	tags=24%, list=21%, signal=30%
REACTOME_BMAL1_CLOCK_NPAS2_ACTIVATES_CIRCADIAN_GENE_EXPRESSION	25	0.5101647	1.2643614	0.1833953	0.49596304	1	4463	tags=32%, list=21%, signal=41%
REACTOME_CHONDROITIN_SULFATE_DERMATAN_SULFATE_METABOLISM	49	0.45792317	1.2643423	0.1574179	0.4947774	1	4952	tags=39%, list=24%, signal=51%
BIOCARTA_ERK_PATHWAY	26	0.50390446	1.2640955	0.17632553	0.49430138	1	4739	tags=35%, list=23%, signal=45%
REACTOME_METABOLISM_OF_FAT_SOLUBLE_VITAMINS	45	0.46512926	1.2637235	0.14835787	0.4941739	1	4188	tags=36%, list=20%, signal=44%
WP_IL18_SIGNALING_PATHWAY	250	0.4086623	1.2629142	0.035140563	0.49532005	1	3689	tags=22%, list=18%, signal=27%
PID_S1P_S1P1_PATHWAY	21	0.5210103	1.2627782	0.18333334	0.49447435	1	2295	tags=19%, list=11%, signal=21%
REACTOME_TNFS_BIND_THEIR_PHYSIOLOGICAL_RECEPTORS	27	0.504193	1.2625699	0.17852685	0.49387136	1	3197	tags=30%, list=15%, signal=35%
REACTOME_CELL_CELL_COMMUNICATION	120	0.42392585	1.2623967	0.07556936	0.49314988	1	7119	tags=46%, list=34%, signal=69%
REACTOME_NEGATIVE_REGULATION_OF_NMDA_RECEPTOR_MEDIATED_NEURONAL_TRANSMISSION	21	0.52772033	1.2617851	0.17402597	0.49388608	1	3485	tags=29%, list=17%, signal=34%
BIOCARTA_TCR_PATHWAY	42	0.4723907	1.2614844	0.1498829	0.4935945	1	4528	tags=31%, list=22%, signal=39%
REACTOME_LEISHMANIA_INFECTION	211	0.41198337	1.2607819	0.045135405	0.4945136	1	5146	tags=29%, list=25%, signal=38%
REACTOME_REGULATION_OF_GENE_EXPRESSION_IN_BETA_CELLS	17	0.54193586	1.2589626	0.21628839	0.49862623	1	2738	tags=18%, list=13%, signal=20%
WP_GPCRS_CLASS_C_METABOTROPIC_GLUTAMATE_PHEROMONE	15	0.54863614	1.257409	0.2008253	0.5021548	1	6978	tags=67%, list=33%, signal=100%
WP_MONOAMINE_GPCRS	29	0.49349165	1.2567687	0.18411553	0.50282615	1	4043	tags=45%, list=19%, signal=55%
REACTOME_THE_PHOTOTRANSDUCTION_CASCADE	29	0.49474227	1.2542021	0.17596035	0.50918996	1	6643	tags=48%, list=32%, signal=71%
REACTOME_FERTILIZATION	18	0.5299105	1.2541418	0.17562254	0.50809443	1	3782	tags=44%, list=18%, signal=54%
WP_NETWORK_MAP_OF_SARSCOV2_SIGNALING_PATHWAY	187	0.41463694	1.2522014	0.06962664	0.5127382	1	4019	tags=25%, list=19%, signal=31%
KEGG_STARCH_AND_SUCROSE_METABOLISM	34	0.48151103	1.2516056	0.17728853	0.5133674	1	2974	tags=41%, list=14%, signal=48%
REACTOME_REGULATION_OF_FZD_BY_UBIQUITINATION	21	0.5169236	1.251472	0.21181001	0.5125502	1	1186	tags=19%, list=6%, signal=20%
WP_HIPPOYAP_SIGNALING_PATHWAY	21	0.5222589	1.251115	0.18592964	0.5123951	1	1057	tags=10%, list=5%, signal=10%
REACTOME_SIGNALING_BY_BMP	25	0.5008205	1.2505964	0.18781094	0.5126363	1	1711	tags=12%, list=8%, signal=13%
REACTOME_ADP_SIGNALLING_THROUGH_P2Y_PURINOCEPTOR_1	25	0.49609944	1.2496545	0.19235511	0.51434386	1	2072	tags=12%, list=10%, signal=13%
REACTOME_TNF_RECEPTOR_SUPERFAMILY_TNFSF_MEMBERS_MEDIATING_NON_CANONICAL_NF_KB_PATHWAY	15	0.5539253	1.2482364	0.19003932	0.5174236	1	5635	tags=53%, list=27%, signal=73%
REACTOME_G_PROTEIN_ACTIVATION	24	0.5029508	1.2462506	0.21189591	0.52225673	1	2072	tags=13%, list=10%, signal=14%
WP_CARDIAC_PROGENITOR_DIFFERENTIATION	52	0.44557494	1.2461618	0.1575419	0.52129024	1	4724	tags=37%, list=23%, signal=47%
WP_CHEMOKINE_SIGNALING_PATHWAY	144	0.41007087	1.2440301	0.099589325	0.52649343	1	4410	tags=24%, list=21%, signal=30%
PID_GMCSF_PATHWAY	35	0.47901466	1.2438639	0.19126329	0.52576685	1	2382	tags=14%, list=11%, signal=16%
WP_LEUKOCYTEINTRINSIC_HIPPO_PATHWAY_FUNCTIONS	34	0.48241344	1.2437868	0.18118466	0.52474684	1	3669	tags=24%, list=18%, signal=28%
REACTOME_SIGNALING_BY_MET	78	0.43039158	1.2436285	0.1237785	0.5239691	1	4306	tags=27%, list=21%, signal=34%
REACTOME_O_GLYCOSYLATION_OF_TSR_DOMAIN_CONTAINING_PROTEINS	38	0.46925896	1.2410135	0.17365967	0.53060067	1	4189	tags=34%, list=20%, signal=43%
PID_IL1_PATHWAY	34	0.4755369	1.2404133	0.17520858	0.53113323	1	1901	tags=15%, list=9%, signal=16%
PID_P53_DOWNSTREAM_PATHWAY	133	0.41405535	1.2401917	0.10185185	0.5306264	1	3409	tags=24%, list=16%, signal=29%
WP_LEPTININSULIN_SIGNALING_OVERLAP	16	0.538732	1.2397109	0.21550591	0.5308066	1	2495	tags=31%, list=12%, signal=35%
REACTOME_ADP_SIGNALLING_THROUGH_P2Y_PURINOCEPTOR_12	20	0.51560134	1.2382818	0.20844327	0.5340481	1	190	tags=5%, list=1%, signal=5%
PID_LYSOPHOSPHOLIPID_PATHWAY	65	0.43496725	1.2378101	0.16629957	0.53420645	1	5331	tags=31%, list=25%, signal=41%
WP_NOCGMPPKG_MEDIATED_NEUROPROTECTION	45	0.45598745	1.2360346	0.17857143	0.53846395	1	4319	tags=33%, list=21%, signal=42%
REACTOME_REGULATION_OF_TLR_BY_ENDOGENOUS_LIGAND	20	0.5191053	1.2359796	0.20897436	0.53738844	1	2165	tags=20%, list=10%, signal=22%
KEGG_CHEMOKINE_SIGNALING_PATHWAY	159	0.40678224	1.2341716	0.0751269	0.54174745	1	4410	tags=24%, list=21%, signal=30%
WP_TARGET_OF_RAPAMYCIN_TOR_SIGNALING	35	0.46611643	1.2340385	0.19171597	0.5409461	1	4528	tags=29%, list=22%, signal=36%
WP_CELL_DIFFERENTIATION_EXPANDED_INDEX	21	0.506384	1.2333783	0.20254777	0.54164934	1	2714	tags=33%, list=13%, signal=38%
REACTOME_RAS_ACTIVATION_UPON_CA2_INFLUX_THROUGH_NMDA_RECEPTOR	20	0.516794	1.2327789	0.23409669	0.54219925	1	3485	tags=25%, list=17%, signal=30%
REACTOME_AMINO_ACID_TRANSPORT_ACROSS_THE_PLASMA_MEMBRANE	32	0.47733045	1.2299225	0.200489	0.5496703	1	1793	tags=19%, list=9%, signal=20%
BIOCARTA_IGF1_PATHWAY	21	0.5085963	1.2294284	0.2150259	0.55001193	1	3436	tags=19%, list=16%, signal=23%
WP_COPPER_HOMEOSTASIS	51	0.44587204	1.2259486	0.17454955	0.559553	1	2691	tags=20%, list=13%, signal=22%
WP_NEURAL_CREST_DIFFERENTIATION	96	0.41523793	1.2255031	0.14572334	0.5596709	1	4749	tags=29%, list=23%, signal=38%
REACTOME_G_ALPHA_Z_SIGNALLING_EVENTS	46	0.45308802	1.2246261	0.20598389	0.5610985	1	5331	tags=30%, list=25%, signal=41%
BIOCARTA_CXCR4_PATHWAY	19	0.5200932	1.224524	0.23892617	0.5601367	1	5267	tags=32%, list=25%, signal=42%
REACTOME_THROMBIN_SIGNALLING_THROUGH_PROTEINASE_ACTIVATED_RECEPTORS_PARS	32	0.4706508	1.2243359	0.20965843	0.5595124	1	6295	tags=28%, list=30%, signal=40%
WP_GPCRS_OTHER	63	0.4340528	1.2237978	0.16424581	0.55997723	1	6197	tags=48%, list=30%, signal=67%
REACTOME_N_GLYCAN_ANTENNAE_ELONGATION_IN_THE_MEDIAL_TRANS_GOLGI	26	0.48169434	1.2212704	0.1908976	0.56673974	1	1027	tags=12%, list=5%, signal=12%
BIOCARTA_AGR_PATHWAY	32	0.4709892	1.2212288	0.2028136	0.56558937	1	5960	tags=38%, list=28%, signal=52%
WP_REGULATION_OF_WNT_BCATENIN_SIGNALING_BY_SMALL_MOLECULE_COMPOUNDS	17	0.5263365	1.2211297	0.2148541	0.5646143	1	3969	tags=29%, list=19%, signal=36%
PID_ENDOTHELIN_PATHWAY	63	0.43318543	1.2172176	0.1735358	0.5757015	1	2382	tags=16%, list=11%, signal=18%
WP_PRIMARY_FOCAL_SEGMENTAL_GLOMERULOSCLEROSIS_FSGS	70	0.42280474	1.216619	0.17526881	0.57631993	1	5478	tags=34%, list=26%, signal=46%
PID_IL6_7_PATHWAY	44	0.4470697	1.216001	0.20880361	0.5769738	1	6285	tags=36%, list=30%, signal=52%
KEGG_ADHERENS_JUNCTION	73	0.42458352	1.2158118	0.17362638	0.5762944	1	5481	tags=30%, list=26%, signal=41%
REACTOME_CELL_EXTRACELLULAR_MATRIX_INTERACTIONS	17	0.52967626	1.2149599	0.22295515	0.5777155	1	8210	tags=65%, list=39%, signal=106%
REACTOME_LONG_TERM_POTENTIATION	23	0.4948006	1.2146944	0.23435582	0.5773038	1	3485	tags=30%, list=17%, signal=36%
WP_DRUG_INDUCTION_OF_BILE_ACID_PATHWAY	15	0.53979987	1.2132823	0.23430963	0.58048445	1	2002	tags=20%, list=10%, signal=22%
PID_PI3KCI_PATHWAY	47	0.453156	1.2117935	0.20276497	0.5837888	1	2691	tags=15%, list=13%, signal=17%
REACTOME_CELL_JUNCTION_ORGANIZATION	86	0.41557536	1.2116091	0.18471338	0.58313215	1	6932	tags=45%, list=33%, signal=68%
REACTOME_AMYLOID_FIBER_FORMATION	48	0.44092897	1.2107377	0.21134594	0.5846601	1	6722	tags=44%, list=32%, signal=64%
BIOCARTA_AT1R_PATHWAY	27	0.48082274	1.2099658	0.21509434	0.58586574	1	5342	tags=30%, list=26%, signal=40%
REACTOME_REGULATION_OF_BETA_CELL_DEVELOPMENT	35	0.45868522	1.2085825	0.21266428	0.58894193	1	5739	tags=34%, list=27%, signal=47%
REACTOME_TRANSPORT_OF_INORGANIC_CATIONS_ANIONS_AND_AMINO_ACIDS_OLIGOPEPTIDES	100	0.40717727	1.2073995	0.1540848	0.591325	1	5166	tags=32%, list=25%, signal=42%
WP_PHYSICOCHEMICAL_FEATURES_AND_TOXICITYASSOCIATED_PATHWAYS	65	0.42904878	1.2063996	0.19629225	0.5932814	1	3486	tags=18%, list=17%, signal=22%
KEGG_VIRAL_MYOCARDITIS	61	0.42537293	1.2060708	0.19846492	0.59300053	1	6680	tags=48%, list=32%, signal=70%
WP_MALIGNANT_PLEURAL_MESOTHELIOMA	418	0.38636854	1.204013	0.047	0.5983637	1	4258	tags=23%, list=20%, signal=29%
BIOCARTA_PML_PATHWAY	16	0.5347766	1.2037505	0.25298014	0.5979609	1	2683	tags=19%, list=13%, signal=21%
PID_IL2_1PATHWAY	52	0.43705192	1.2033021	0.20945945	0.5981136	1	3689	tags=19%, list=18%, signal=23%
REACTOME_INSULIN_RECEPTOR_SIGNALLING_CASCADE	49	0.4331838	1.2016181	0.2055866	0.60213965	1	4158	tags=24%, list=20%, signal=30%
WP_SYNAPTIC_SIGNALING_PATHWAYS_ASSOCIATED_WITH_AUTISM_SPECTRUM_DISORDER	48	0.4364203	1.2013185	0.21822272	0.60182726	1	5576	tags=35%, list=27%, signal=48%
WP_BMP_SIGNALING_IN_EYELID_DEVELOPMENT	20	0.5087866	1.201277	0.24577373	0.6006777	1	1949	tags=20%, list=9%, signal=22%
WP_AIRWAY_SMOOTH_MUSCLE_CELL_CONTRACTION	16	0.5312718	1.2005409	0.2668428	0.6016952	1	1323	tags=13%, list=6%, signal=13%
REACTOME_NEUTROPHIL_DEGRANULATION	434	0.38275704	1.2003287	0.057	0.601032	1	4733	tags=23%, list=23%, signal=29%
REACTOME_SIGNALING_BY_NODAL	20	0.50189734	1.1959623	0.24324325	0.6137664	1	5047	tags=35%, list=24%, signal=46%
BIOCARTA_PDZS_PATHWAY	17	0.52307266	1.1955229	0.2486702	0.6138922	1	6826	tags=47%, list=33%, signal=70%
WP_CELLS_AND_MOLECULES_INVOLVED_IN_LOCAL_ACUTE_INFLAMMATORY_RESPONSE	17	0.51064926	1.195486	0.25587466	0.6127379	1	6628	tags=71%, list=32%, signal=103%
REACTOME_RUNX2_REGULATES_BONE_DEVELOPMENT	30	0.46877933	1.1946863	0.24537608	0.61405396	1	5844	tags=40%, list=28%, signal=55%
REACTOME_NEPHRIN_FAMILY_INTERACTIONS	22	0.4980641	1.1945786	0.24775353	0.61310023	1	7760	tags=59%, list=37%, signal=94%
REACTOME_SYNAPTIC_ADHESION_LIKE_MOLECULES	21	0.4991054	1.194031	0.25631315	0.6135218	1	2860	tags=29%, list=14%, signal=33%
WP_CIRCADIAN_RHYTHM_GENES	183	0.3924083	1.1929114	0.12323232	0.6157465	1	2959	tags=21%, list=14%, signal=24%
REACTOME_GLUCAGON_TYPE_LIGAND_RECEPTORS	30	0.4671153	1.191538	0.2554217	0.6186639	1	5239	tags=37%, list=25%, signal=49%
SA_TRKA_RECEPTOR	17	0.519092	1.1914753	0.26498002	0.61759245	1	6285	tags=47%, list=30%, signal=67%
PID_INTEGRIN_A4B1_PATHWAY	31	0.45393163	1.1910479	0.25181597	0.61755246	1	1679	tags=13%, list=8%, signal=14%
BIOCARTA_GSK3_PATHWAY	20	0.5005222	1.1895757	0.2446406	0.62101287	1	826	tags=10%, list=4%, signal=10%
WP_HYPOTHESIZED_PATHWAYS_IN_PATHOGENESIS_OF_CARDIOVASCULAR_DISEASE	24	0.48078322	1.1895593	0.2506173	0.61978334	1	5137	tags=29%, list=25%, signal=39%
WP_RAS_SIGNALING	172	0.3907737	1.1876768	0.13488844	0.62449706	1	6451	tags=36%, list=31%, signal=52%
WP_SUDDEN_INFANT_DEATH_SYNDROME_SIDS_SUSCEPTIBILITY_PATHWAYS	147	0.39235598	1.1863075	0.16207951	0.6276141	1	2738	tags=19%, list=13%, signal=22%
PID_ALPHA_SYNUCLEIN_PATHWAY	31	0.45843038	1.1860414	0.25360578	0.62720835	1	1245	tags=10%, list=6%, signal=10%
WP_ARYL_HYDROCARBON_RECEPTOR_PATHWAY_WP2586	45	0.43687597	1.183559	0.23536165	0.6338367	1	2515	tags=20%, list=12%, signal=23%
REACTOME_PROSTACYCLIN_SIGNALLING_THROUGH_PROSTACYCLIN_RECEPTOR	19	0.5108122	1.1832099	0.2620865	0.63362426	1	6190	tags=32%, list=30%, signal=45%
REACTOME_CREB1_PHOSPHORYLATION_THROUGH_NMDA_RECEPTOR_MEDIATED_ACTIVATION_OF_RAS_SIGNALING	28	0.46292126	1.1830496	0.24725944	0.6328803	1	3635	tags=21%, list=17%, signal=26%
WP_IL3_SIGNALING_PATHWAY	44	0.44180968	1.1829373	0.22352941	0.6319236	1	5478	tags=32%, list=26%, signal=43%
WP_REGULATORY_CIRCUITS_OF_THE_STAT3_SIGNALING_PATHWAY	75	0.40689832	1.1828674	0.2131324	0.6308541	1	3121	tags=20%, list=15%, signal=23%
WP_NONGENOMIC_ACTIONS_OF_125_DIHYDROXYVITAMIN_D3	64	0.419045	1.1826184	0.2273224	0.63035387	1	5331	tags=33%, list=25%, signal=44%
WP_BLADDER_CANCER	41	0.4392513	1.1822635	0.23619272	0.63018185	1	3606	tags=24%, list=17%, signal=29%
WP_VITAMIN_DSENSITIVE_CALCIUM_SIGNALING_IN_DEPRESSION	37	0.4515833	1.1822019	0.25086704	0.6290873	1	5576	tags=43%, list=27%, signal=59%
WP_DOPAMINERGIC_NEUROGENESIS	28	0.47156957	1.1821876	0.25276074	0.6278554	1	734	tags=14%, list=4%, signal=15%
WP_EICOSANOID_METABOLISM_VIA_CYCLOOXYGENASES_COX	29	0.463335	1.1820035	0.24851367	0.62717664	1	5007	tags=38%, list=24%, signal=50%
REACTOME_REGULATION_OF_INSULIN_SECRETION	72	0.4149624	1.1819557	0.22258064	0.6260931	1	7593	tags=42%, list=36%, signal=65%
PID_SMAD2_3NUCLEAR_PATHWAY	78	0.40831685	1.1818111	0.21221864	0.6252462	1	2801	tags=17%, list=13%, signal=19%
WP_FACTORS_AND_PATHWAYS_AFFECTING_INSULINLIKE_GROWTH_FACTOR_IGF1AKT_SIGNALING	37	0.4396792	1.1791803	0.2535545	0.6323201	1	6388	tags=43%, list=31%, signal=62%
WP_DISRUPTION_OF_POSTSYNAPTIC_SIGNALING_BY_CNV	33	0.45340762	1.1784531	0.26904762	0.6333537	1	6186	tags=42%, list=30%, signal=60%
BIOCARTA_TALL1_PATHWAY	15	0.52160126	1.1782392	0.27762803	0.6327802	1	4319	tags=40%, list=21%, signal=50%
WP_FARNESOID_X_RECEPTOR_PATHWAY	15	0.5215819	1.1774741	0.2768212	0.6339135	1	1635	tags=13%, list=8%, signal=14%
BIOCARTA_LAIR_PATHWAY	17	0.51064914	1.1772366	0.28208557	0.6334749	1	6628	tags=71%, list=32%, signal=103%
PID_ANGIOPOIETIN_RECEPTOR_PATHWAY	49	0.43085727	1.1760757	0.2396789	0.6358664	1	5478	tags=35%, list=26%, signal=47%
REACTOME_NR1H3_NR1H2_REGULATE_GENE_EXPRESSION_LINKED_TO_CHOLESTEROL_TRANSPORT_AND_EFFLUX	35	0.44969893	1.1757866	0.2659698	0.63553864	1	8246	tags=54%, list=39%, signal=89%
REACTOME_PLATELET_AGGREGATION_PLUG_FORMATION	38	0.4417919	1.1750709	0.2655889	0.636497	1	4257	tags=37%, list=20%, signal=46%
WP_COMMON_PATHWAYS_UNDERLYING_DRUG_ADDICTION	41	0.4388495	1.1741822	0.2603211	0.6380047	1	5231	tags=29%, list=25%, signal=39%
WP_SELENIUM_MICRONUTRIENT_NETWORK	81	0.40790218	1.1739835	0.20940171	0.6373507	1	2600	tags=19%, list=12%, signal=21%
PID_SYNDECAN_2_PATHWAY	32	0.4598986	1.1736856	0.24644549	0.63707405	1	3577	tags=25%, list=17%, signal=30%
REACTOME_RAF_INDEPENDENT_MAPK1_3_ACTIVATION	23	0.4805534	1.1728617	0.2776382	0.63845706	1	3777	tags=30%, list=18%, signal=37%
PID_MYC_REPRESS_PATHWAY	59	0.41883218	1.1728508	0.23333333	0.6372532	1	3201	tags=24%, list=15%, signal=28%
REACTOME_INTERLEUKIN_3_INTERLEUKIN_5_AND_GM_CSF_SIGNALING	42	0.43778065	1.1727796	0.24766356	0.6362187	1	5478	tags=33%, list=26%, signal=45%
REACTOME_KERATAN_SULFATE_KERATIN_METABOLISM	33	0.45172665	1.1723458	0.25677267	0.6363251	1	5891	tags=39%, list=28%, signal=55%
WP_TCELL_ACTIVATION_SARSCOV2	74	0.40688226	1.1720861	0.23484848	0.6359252	1	4319	tags=27%, list=21%, signal=34%
REACTOME_GRB2_SOS_PROVIDES_LINKAGE_TO_MAPK_SIGNALING_FOR_INTEGRINS	15	0.5229991	1.1718017	0.27272728	0.63553995	1	4257	tags=40%, list=20%, signal=50%
PID_AVB3_OPN_PATHWAY	31	0.45960867	1.1714683	0.26913875	0.635455	1	5342	tags=35%, list=26%, signal=48%
REACTOME_BIOSYNTHESIS_OF_SPECIALIZED_PRORESOLVING_MEDIATORS_SPMS	17	0.5113505	1.1714038	0.2946545	0.63443166	1	2410	tags=24%, list=12%, signal=27%
WP_BLOOD_CLOTTING_CASCADE	20	0.49168473	1.1712584	0.27621484	0.6336652	1	5226	tags=55%, list=25%, signal=73%
REACTOME_FORMATION_OF_FIBRIN_CLOT_CLOTTING_CASCADE	33	0.44154567	1.171076	0.25417662	0.6329888	1	4257	tags=39%, list=20%, signal=49%
REACTOME_REGULATION_OF_PYRUVATE_DEHYDROGENASE_PDH_COMPLEX	15	0.5139392	1.1705886	0.28609985	0.6333513	1	1362	tags=13%, list=7%, signal=14%
PID_FGF_PATHWAY	53	0.41937807	1.170531	0.23617512	0.63231385	1	4309	tags=25%, list=21%, signal=31%
REACTOME_TRANSPORT_OF_VITAMINS_NUCLEOSIDES_AND_RELATED_MOLECULES	40	0.43777955	1.1705061	0.2737819	0.63117707	1	3420	tags=28%, list=16%, signal=33%
REACTOME_IRS_MEDIATED_SIGNALLING	44	0.4357757	1.1701198	0.23577236	0.63118917	1	4158	tags=25%, list=20%, signal=31%
REACTOME_ASSEMBLY_AND_CELL_SURFACE_PRESENTATION_OF_NMDA_RECEPTORS	43	0.43229726	1.1677685	0.2652124	0.6373019	1	3825	tags=33%, list=18%, signal=40%
KEGG_INSULIN_SIGNALING_PATHWAY	126	0.38672295	1.1669847	0.19222903	0.63852245	1	4315	tags=21%, list=21%, signal=27%
REACTOME_MAPK_TARGETS_NUCLEAR_EVENTS_MEDIATED_BY_MAP_KINASES	31	0.44832432	1.165085	0.25480768	0.64323735	1	5049	tags=26%, list=24%, signal=34%
REACTOME_G_BETA_GAMMA_SIGNALLING_THROUGH_CDC42	20	0.49431095	1.1635147	0.28097063	0.64686567	1	190	tags=5%, list=1%, signal=5%
WP_HEPATITIS_C_AND_HEPATOCELLULAR_CARCINOMA	47	0.42330873	1.1633444	0.24689966	0.64614606	1	2600	tags=19%, list=12%, signal=22%
BIOCARTA_GH_PATHWAY	26	0.47008228	1.1625186	0.2691358	0.6474409	1	6682	tags=35%, list=32%, signal=51%
REACTOME_NEURONAL_SYSTEM	384	0.37403625	1.1622635	0.08008008	0.64700305	1	3527	tags=21%, list=17%, signal=24%
BIOCARTA_TPO_PATHWAY	24	0.46634012	1.1618494	0.27791262	0.64708555	1	4883	tags=29%, list=23%, signal=38%
REACTOME_KERATAN_SULFATE_BIOSYNTHESIS	27	0.4611922	1.1601492	0.28170732	0.6511247	1	5891	tags=41%, list=28%, signal=57%
REACTOME_PLATELET_HOMEOSTASIS	84	0.39706427	1.1599392	0.22526316	0.6505181	1	5239	tags=30%, list=25%, signal=40%
REACTOME_INWARDLY_RECTIFYING_K_CHANNELS	35	0.44188428	1.1597842	0.2748815	0.6497995	1	190	tags=6%, list=1%, signal=6%
WP_INTEGRINMEDIATED_CELL_ADHESION	101	0.39135247	1.1591394	0.24586777	0.6505506	1	6285	tags=34%, list=30%, signal=48%
KEGG_NOTCH_SIGNALING_PATHWAY	45	0.4235415	1.1591201	0.25167784	0.6494142	1	6935	tags=49%, list=33%, signal=73%
REACTOME_GLUCAGON_SIGNALING_IN_METABOLIC_REGULATION	31	0.4543356	1.1588929	0.2774427	0.64886516	1	396	tags=6%, list=2%, signal=7%
REACTOME_CIRCADIAN_CLOCK	67	0.4113759	1.1586816	0.24864864	0.6482588	1	5733	tags=34%, list=27%, signal=47%
WP_G_PROTEIN_SIGNALING_PATHWAYS	90	0.39670578	1.1578135	0.24185069	0.649743	1	7588	tags=38%, list=36%, signal=59%
WP_PLATELETMEDIATED_INTERACTIONS_WITH_VASCULAR_AND_CIRCULATING_CELLS	15	0.52813387	1.157635	0.3010899	0.6491162	1	2264	tags=27%, list=11%, signal=30%
REACTOME_INTERLEUKIN_RECEPTOR_SHC_SIGNALING	22	0.4743799	1.1563098	0.27468354	0.65199256	1	5207	tags=36%, list=25%, signal=48%
REACTOME_METABOLISM_OF_CARBOHYDRATES	279	0.37321597	1.156276	0.14028056	0.6509083	1	3425	tags=20%, list=16%, signal=23%
REACTOME_CONSTITUTIVE_SIGNALING_BY_ABERRANT_PI3K_IN_CANCER	70	0.4000863	1.1548816	0.25053763	0.6540232	1	4762	tags=33%, list=23%, signal=42%
REACTOME_P130CAS_LINKAGE_TO_MAPK_SIGNALING_FOR_INTEGRINS	15	0.5177553	1.1528109	0.28650138	0.6593706	1	5267	tags=47%, list=25%, signal=62%
WP_CELL_DIFFERENTIATION_INDEX	15	0.5127559	1.1522633	0.30238727	0.6598905	1	2692	tags=33%, list=13%, signal=38%
WP_TCA_CYCLE_AND_DEFICIENCY_OF_PYRUVATE_DEHYDROGENASE_COMPLEX_PDHC	15	0.5106947	1.1498027	0.3378016	0.66647863	1	26	tags=7%, list=0%, signal=7%
PID_WNT_CANONICAL_PATHWAY	19	0.494822	1.1497188	0.29586563	0.6655373	1	2473	tags=16%, list=12%, signal=18%
PID_KIT_PATHWAY	51	0.41855383	1.1494249	0.28348213	0.6652189	1	4693	tags=29%, list=22%, signal=38%
WP_ANGIOTENSIN_II_RECEPTOR_TYPE_1_PATHWAY	25	0.45914713	1.1493744	0.31125	0.6641667	1	5549	tags=40%, list=27%, signal=54%
REACTOME_CELLULAR_RESPONSE_TO_HYPOXIA	70	0.39893964	1.149267	0.2636656	0.663311	1	575	tags=7%, list=3%, signal=7%
WP_EXTRACELLULAR_VESICLEMEDIATED_SIGNALING_IN_RECIPIENT_CELLS	29	0.45125964	1.1481899	0.27379555	0.66562814	1	5047	tags=31%, list=24%, signal=41%
REACTOME_FGFR2_LIGAND_BINDING_AND_ACTIVATION	16	0.50353926	1.1463368	0.30371353	0.6702119	1	1728	tags=19%, list=8%, signal=20%
BIOCARTA_NO1_PATHWAY	27	0.4571791	1.145878	0.31572327	0.67040884	1	2639	tags=26%, list=13%, signal=30%
REACTOME_BINDING_AND_UPTAKE_OF_LIGANDS_BY_SCAVENGER_RECEPTORS	37	0.43283775	1.1456413	0.28424656	0.6698899	1	4147	tags=41%, list=20%, signal=50%
REACTOME_FLT3_SIGNALING	37	0.42689848	1.1430266	0.29625294	0.6768408	1	5478	tags=32%, list=26%, signal=44%
WP_PHOTODYNAMIC_THERAPYINDUCED_UNFOLDED_PROTEIN_RESPONSE	26	0.45850506	1.142978	0.31572482	0.6757743	1	4147	tags=31%, list=20%, signal=38%
REACTOME_GLUCAGON_LIKE_PEPTIDE_1_GLP1_REGULATES_INSULIN_SECRETION	39	0.43148944	1.1429092	0.2900585	0.6747812	1	782	tags=8%, list=4%, signal=8%
WP_DEVELOPMENT_OF_URETERIC_COLLECTION_SYSTEM	60	0.40772936	1.1416858	0.28444445	0.6773748	1	3664	tags=22%, list=18%, signal=26%
REACTOME_SIGNALING_BY_FLT3_FUSION_PROTEINS	19	0.48229495	1.1414753	0.3090909	0.6768426	1	6716	tags=47%, list=32%, signal=70%
REACTOME_PI3K_AKT_SIGNALING_IN_CANCER	97	0.3905029	1.1410834	0.254717	0.6769184	1	5699	tags=37%, list=27%, signal=51%
BIOCARTA_TGFB_PATHWAY	19	0.48361245	1.1388844	0.3273196	0.6824172	1	8954	tags=63%, list=43%, signal=110%
WP_CYTOPLASMIC_RIBOSOMAL_PROTEINS	86	0.38789955	1.1387018	0.26984128	0.681771	1	10150	tags=81%, list=49%, signal=157%
REACTOME_ROLE_OF_PHOSPHOLIPIDS_IN_PHAGOCYTOSIS	24	0.45603958	1.1380291	0.2936893	0.682713	1	6477	tags=50%, list=31%, signal=72%
PID_EPHRINB_REV_PATHWAY	29	0.44982237	1.1375623	0.31995133	0.6829487	1	1245	tags=10%, list=6%, signal=11%
REACTOME_GENERATION_OF_SECOND_MESSENGER_MOLECULES	29	0.44798696	1.1363224	0.3131936	0.68558747	1	4698	tags=34%, list=22%, signal=44%
REACTOME_EUKARYOTIC_TRANSLATION_ELONGATION	90	0.38975042	1.13618	0.27329844	0.68485117	1	10314	tags=82%, list=49%, signal=161%
REACTOME_EPHRIN_SIGNALING	19	0.48068774	1.1358265	0.31620553	0.6847464	1	8250	tags=47%, list=39%, signal=78%
PID_TRKR_PATHWAY	60	0.40464786	1.1346197	0.29589632	0.6873245	1	4882	tags=30%, list=23%, signal=39%
WP_TNFRELATED_WEAK_INDUCER_OF_APOPTOSIS_TWEAK_SIGNALING_PATHWAY	42	0.42147192	1.1345825	0.3020595	0.6862445	1	4649	tags=29%, list=22%, signal=37%
REACTOME_SEMA4D_IN_SEMAPHORIN_SIGNALING	23	0.47180337	1.1336912	0.33205128	0.6879027	1	7173	tags=43%, list=34%, signal=66%
WP_OVERLAP_BETWEEN_SIGNAL_TRANSDUCTION_PATHWAYS_CONTRIBUTING_TO_LMNA_LAMINOPATHIES	53	0.40480617	1.1336632	0.29801324	0.68680483	1	2508	tags=17%, list=12%, signal=19%
REACTOME_PI_3K_CASCADE_FGFR4	17	0.49024385	1.1310693	0.32712767	0.6936982	1	4158	tags=29%, list=20%, signal=37%
WP_METABOLIC_REPROGRAMMING_IN_COLON_CANCER	40	0.42669812	1.1309185	0.31271878	0.692961	1	2158	tags=25%, list=10%, signal=28%
REACTOME_SIGNAL_AMPLIFICATION	31	0.43084502	1.1301308	0.31861576	0.6942898	1	2072	tags=10%, list=10%, signal=11%
WP_MIR5093P_ALTERATION_OF_YAP1ECM_AXIS	17	0.49265796	1.1299264	0.32707775	0.6937691	1	7581	tags=65%, list=36%, signal=101%
KEGG_T_CELL_RECEPTOR_SIGNALING_PATHWAY	97	0.37923336	1.1297557	0.26050422	0.69306946	1	4319	tags=26%, list=21%, signal=32%
KEGG_GNRH_SIGNALING_PATHWAY	89	0.38762474	1.129529	0.27253887	0.6925944	1	5396	tags=29%, list=26%, signal=39%
REACTOME_SEMA4D_INDUCED_CELL_MIGRATION_AND_GROWTH_CONE_COLLAPSE	19	0.4709684	1.1294233	0.3368146	0.69171864	1	7173	tags=42%, list=34%, signal=64%
WP_ENDOPLASMIC_RETICULUM_STRESS_RESPONSE_IN_CORONAVIRUS_INFECTION	46	0.41776964	1.1291738	0.29006773	0.69129395	1	3066	tags=20%, list=15%, signal=23%
REACTOME_DAP12_SIGNALING	27	0.45558035	1.126589	0.33698297	0.698077	1	3202	tags=22%, list=15%, signal=26%
WP_MAPK_PATHWAY_IN_CONGENITAL_THYROID_CANCER	15	0.50311804	1.1261734	0.32967034	0.6981943	1	2382	tags=20%, list=11%, signal=23%
PID_CXCR4_PATHWAY	97	0.38394788	1.1231669	0.26898733	0.70635206	1	4315	tags=20%, list=21%, signal=25%
PID_REG_GR_PATHWAY	73	0.39616948	1.1230069	0.30032292	0.70560414	1	4319	tags=25%, list=21%, signal=31%
REACTOME_EPH_EPHRIN_MEDIATED_REPULSION_OF_CELLS	51	0.40798536	1.1224257	0.31138393	0.70617664	1	4881	tags=25%, list=23%, signal=33%
REACTOME_INTERFERON_GAMMA_SIGNALING	87	0.388416	1.1223941	0.2769556	0.70505947	1	4388	tags=25%, list=21%, signal=32%
REACTOME_INTERLEUKIN_2_FAMILY_SIGNALING	36	0.43233424	1.1223007	0.32324454	0.7041784	1	5281	tags=31%, list=25%, signal=41%
WP_NOTCH_SIGNALING	43	0.41854718	1.1221257	0.3127148	0.7034958	1	6935	tags=49%, list=33%, signal=73%
WP_NANOPARTICLEMEDIATED_ACTIVATION_OF_RECEPTOR_SIGNALING	28	0.4399742	1.1218606	0.33621755	0.7031028	1	6285	tags=39%, list=30%, signal=56%
PID_CD8_TCR_PATHWAY	48	0.4050182	1.1214483	0.32211	0.7031691	1	4528	tags=29%, list=22%, signal=37%
REACTOME_DISEASES_OF_GLYCOSYLATION	139	0.3768571	1.1212747	0.26136363	0.7025291	1	4310	tags=27%, list=21%, signal=34%
REACTOME_AFLATOXIN_ACTIVATION_AND_DETOXIFICATION	16	0.5005801	1.1188582	0.35607094	0.7087453	1	6366	tags=63%, list=30%, signal=90%
REACTOME_DECTIN_2_FAMILY	21	0.46385008	1.1188066	0.34081903	0.7076937	1	2870	tags=33%, list=14%, signal=39%
REACTOME_FRS_MEDIATED_FGFR4_SIGNALING	19	0.47228652	1.1170181	0.33547556	0.7119473	1	6349	tags=42%, list=30%, signal=60%
WP_INSULIN_SIGNALING	157	0.3679773	1.1158192	0.25963488	0.7146403	1	3689	tags=19%, list=18%, signal=23%
KEGG_TIGHT_JUNCTION	123	0.37069994	1.1155617	0.29012346	0.7142862	1	5440	tags=29%, list=26%, signal=39%
REACTOME_NOTCH4_INTRACELLULAR_DOMAIN_REGULATES_TRANSCRIPTION	20	0.46346477	1.1150938	0.33639947	0.714622	1	5549	tags=45%, list=27%, signal=61%
WP_HIPPO_SIGNALING_REGULATION_PATHWAYS	94	0.3819768	1.113876	0.30042464	0.717189	1	5481	tags=31%, list=26%, signal=42%
KEGG_ANTIGEN_PROCESSING_AND_PRESENTATION	60	0.3987874	1.1129228	0.30634573	0.71897894	1	3202	tags=27%, list=15%, signal=31%
BIOCARTA_PTEN_PATHWAY	17	0.48364252	1.112822	0.36473754	0.71812886	1	7737	tags=53%, list=37%, signal=84%
WP_METABOLIC_PATHWAY_OF_LDL_HDL_AND_TG_INCLUDING_DISEASES	15	0.4910083	1.1127281	0.34924966	0.7172323	1	5379	tags=53%, list=26%, signal=72%
REACTOME_NICOTINATE_METABOLISM	29	0.43516716	1.1119167	0.3484487	0.7185114	1	6135	tags=41%, list=29%, signal=58%
BIOCARTA_BCR_PATHWAY	33	0.42791286	1.1099226	0.32304037	0.7233669	1	4528	tags=27%, list=22%, signal=35%
REACTOME_PI_3K_CASCADE_FGFR1	17	0.4786175	1.109475	0.32214764	0.7234303	1	5699	tags=41%, list=27%, signal=57%
REACTOME_HS_GAG_DEGRADATION	22	0.45673996	1.109012	0.3272727	0.7236668	1	4078	tags=36%, list=19%, signal=45%
REACTOME_PD_1_SIGNALING	18	0.47794262	1.1084667	0.35677084	0.72414345	1	3581	tags=33%, list=17%, signal=40%
WP_EBOLA_VIRUS_INFECTION_IN_HOST	123	0.36812997	1.1083986	0.29641026	0.72315216	1	4376	tags=24%, list=21%, signal=30%
WP_NRP1TRIGGERED_SIGNALING_PATHWAYS_IN_PANCREATIC_CANCER	52	0.39971805	1.1080024	0.32098764	0.72316825	1	5267	tags=38%, list=25%, signal=51%
WP_ERK_PATHWAY_IN_HUNTINGTONS_DISEASE	15	0.48825175	1.1060636	0.34175533	0.7279867	1	1949	tags=13%, list=9%, signal=15%
REACTOME_RAP1_SIGNALLING	15	0.4782078	1.1049157	0.36424732	0.7302116	1	2427	tags=20%, list=12%, signal=23%
WP_T_CELL_RECEPTOR_AND_COSTIMULATORY_SIGNALING	27	0.44114605	1.1045066	0.35766423	0.73031765	1	4528	tags=33%, list=22%, signal=42%
REACTOME_GAP_JUNCTION_ASSEMBLY	33	0.42347446	1.1024469	0.3444577	0.73547137	1	3825	tags=39%, list=18%, signal=48%
REACTOME_DARPP_32_EVENTS	23	0.46109372	1.1018323	0.37817258	0.736139	1	87	tags=4%, list=0%, signal=4%
WP_HIPPOMERLIN_SIGNALING_DYSREGULATION	116	0.36887047	1.1015728	0.31627432	0.73567605	1	4937	tags=28%, list=24%, signal=37%
REACTOME_NOTCH_HLH_TRANSCRIPTION_PATHWAY	27	0.4347658	1.100923	0.35979512	0.73643696	1	5461	tags=37%, list=26%, signal=50%
WP_TRYPTOPHAN_CATABOLISM_LEADING_TO_NAD_PRODUCTION	15	0.48973522	1.1003702	0.35317996	0.7369443	1	5404	tags=47%, list=26%, signal=63%
REACTOME_RECEPTOR_TYPE_TYROSINE_PROTEIN_PHOSPHATASES	20	0.46649748	1.0987016	0.36237374	0.7408787	1	2120	tags=20%, list=10%, signal=22%
KEGG_RIBOSOME	84	0.37856755	1.0979283	0.31914893	0.74199456	1	10314	tags=83%, list=49%, signal=164%
REACTOME_PEPTIDE_HORMONE_METABOLISM	77	0.38814425	1.0978733	0.315508	0.74096006	1	4280	tags=22%, list=20%, signal=28%
REACTOME_CELL_CELL_JUNCTION_ORGANIZATION	60	0.39081725	1.0968332	0.33587787	0.74300975	1	5014	tags=32%, list=24%, signal=42%
REACTOME_SIGNALING_BY_INTERLEUKINS	398	0.350651	1.0964854	0.21421422	0.7428888	1	3125	tags=18%, list=15%, signal=20%
REACTOME_ADRENALINE_NORADRENALINE_INHIBITS_INSULIN_SECRETION	28	0.43305096	1.0957981	0.33168927	0.74387527	1	7805	tags=43%, list=37%, signal=68%
REACTOME_SYNTHESIS_OF_PROSTAGLANDINS_PG_AND_THROMBOXANES_TX	15	0.48821247	1.0952411	0.37953368	0.7444121	1	4839	tags=47%, list=23%, signal=61%
WP_NRF2_PATHWAY	128	0.36817893	1.094697	0.3069001	0.7448784	1	3082	tags=19%, list=15%, signal=22%
REACTOME_INTEGRIN_SIGNALING	27	0.4379625	1.0926335	0.36531365	0.7499444	1	4257	tags=30%, list=20%, signal=37%
WP_NEPHROGENESIS	17	0.4694681	1.0925516	0.37046632	0.74899966	1	1157	tags=18%, list=6%, signal=19%
REACTOME_PI_3K_CASCADE_FGFR3	16	0.47181666	1.0912515	0.37632978	0.7515731	1	4158	tags=31%, list=20%, signal=39%
REACTOME_FCERI_MEDIATED_MAPK_ACTIVATION	31	0.4235427	1.0911168	0.3726708	0.7507377	1	2414	tags=13%, list=12%, signal=15%
PID_S1P_META_PATHWAY	21	0.46104616	1.090426	0.37227213	0.7517012	1	2072	tags=14%, list=10%, signal=16%
KEGG_WNT_SIGNALING_PATHWAY	140	0.3617576	1.0902355	0.30722278	0.75109255	1	3689	tags=16%, list=18%, signal=20%
REACTOME_GAB1_SIGNALOSOME	17	0.47342944	1.0900389	0.36458334	0.75047874	1	3466	tags=29%, list=17%, signal=35%
KEGG_CELL_ADHESION_MOLECULES_CAMS	121	0.36366656	1.0898654	0.30215827	0.74983174	1	4547	tags=34%, list=22%, signal=43%
REACTOME_SHC_MEDIATED_CASCADE_FGFR4	17	0.46648487	1.0895461	0.39119172	0.7496172	1	6349	tags=41%, list=30%, signal=59%
PID_CD40_PATHWAY	28	0.43412054	1.0893618	0.3731527	0.74898666	1	5635	tags=32%, list=27%, signal=44%
BIOCARTA_NFKB_PATHWAY	21	0.45395532	1.0888091	0.36469072	0.74947834	1	4319	tags=29%, list=21%, signal=36%
REACTOME_MECP2_REGULATES_NEURONAL_RECEPTORS_AND_CHANNELS	18	0.46055913	1.0886122	0.36399475	0.7488976	1	2118	tags=17%, list=10%, signal=19%
REACTOME_MITOCHONDRIAL_CALCIUM_ION_TRANSPORT	23	0.45093936	1.088574	0.37139273	0.7478435	1	35	tags=4%, list=0%, signal=4%
WP_IL4_SIGNALING_PATHWAY	52	0.3943407	1.088419	0.35642457	0.7471225	1	7762	tags=48%, list=37%, signal=76%
WP_FGF23_SIGNALING_IN_HYPOPHOSPHATEMIC_RICKETS_AND_RELATED_DISORDERS	19	0.45566615	1.0883694	0.36780104	0.74611753	1	4142	tags=37%, list=20%, signal=46%
WP_ANGIOPOIETINLIKE_PROTEIN_8_REGULATORY_PATHWAY	125	0.3650574	1.0881839	0.3227459	0.745469	1	4315	tags=19%, list=21%, signal=24%
REACTOME_METABOLISM_OF_STEROIDS	143	0.35808796	1.0881284	0.3305955	0.7444883	1	2778	tags=13%, list=13%, signal=15%
PID_EPHB_FWD_PATHWAY	40	0.40767837	1.0869617	0.36698338	0.74680007	1	5408	tags=25%, list=26%, signal=34%
KEGG_TOLL_LIKE_RECEPTOR_SIGNALING_PATHWAY	82	0.3781524	1.0855175	0.3404711	0.74992317	1	4319	tags=22%, list=21%, signal=28%
PID_INSULIN_GLUCOSE_PATHWAY	25	0.44027683	1.0851682	0.37901235	0.74978536	1	1985	tags=12%, list=9%, signal=13%
PID_VEGFR1_PATHWAY	26	0.43371576	1.083888	0.38780487	0.7523063	1	2673	tags=23%, list=13%, signal=26%
BIOCARTA_GLEEVEC_PATHWAY	23	0.43677333	1.083673	0.3802817	0.7518008	1	3482	tags=17%, list=17%, signal=21%
REACTOME_EGFR_DOWNREGULATION	31	0.42324758	1.0824649	0.36579573	0.75427866	1	1949	tags=13%, list=9%, signal=14%
PID_A6B1_A6B4_INTEGRIN_PATHWAY	46	0.3931642	1.0805155	0.36693093	0.75891316	1	7638	tags=39%, list=37%, signal=62%
REACTOME_POTASSIUM_CHANNELS	96	0.369434	1.0804089	0.3643979	0.75808954	1	3437	tags=19%, list=16%, signal=22%
BIOCARTA_PDGF_PATHWAY	28	0.41847852	1.0801245	0.37801933	0.7577888	1	7737	tags=43%, list=37%, signal=68%
WP_SLEEP_REGULATION	29	0.42918453	1.0797348	0.38573155	0.75779647	1	2959	tags=28%, list=14%, signal=32%
WP_PROSTAGLANDIN_SYNTHESIS_AND_REGULATION	43	0.39716962	1.0773067	0.38274336	0.7640342	1	5317	tags=37%, list=25%, signal=50%
REACTOME_DISEASES_OF_CARBOHYDRATE_METABOLISM	32	0.42099896	1.0771923	0.38470587	0.76320136	1	1771	tags=16%, list=8%, signal=17%
REACTOME_DOWNSTREAM_SIGNALING_OF_ACTIVATED_FGFR4	24	0.43577516	1.0769699	0.38916877	0.7627113	1	6349	tags=38%, list=30%, signal=54%
PID_IL2_STAT5_PATHWAY	25	0.4349171	1.0767921	0.4120603	0.7620547	1	2569	tags=20%, list=12%, signal=23%
WP_KYNURENINE_PATHWAY_AND_LINKS_TO_CELL_SENESCENCE	18	0.46647665	1.0766231	0.39374185	0.7614007	1	5240	tags=39%, list=25%, signal=52%
REACTOME_SEMAPHORIN_INTERACTIONS	61	0.38061926	1.0736818	0.38777778	0.76904833	1	7173	tags=38%, list=34%, signal=57%
WP_IL1_AND_MEGAKARYOCYTES_IN_OBESITY	21	0.44247246	1.0732561	0.4052369	0.76910824	1	3758	tags=29%, list=18%, signal=35%
REACTOME_SIGNALING_BY_NOTCH1_HD_DOMAIN_MUTANTS_IN_CANCER	15	0.48065144	1.073232	0.3994602	0.7680249	1	5519	tags=40%, list=26%, signal=54%
PID_TCR_PATHWAY	60	0.3792841	1.0720052	0.3592552	0.7706218	1	5156	tags=33%, list=25%, signal=44%
SA_PTEN_PATHWAY	17	0.46158373	1.0713153	0.38089004	0.77154917	1	7737	tags=53%, list=37%, signal=84%
REACTOME_SIGNALING_BY_RETINOIC_ACID	40	0.3993257	1.0711281	0.3986014	0.77096206	1	2683	tags=25%, list=13%, signal=29%
REACTOME_TFAP2_AP_2_FAMILY_REGULATES_TRANSCRIPTION_OF_GROWTH_FACTORS_AND_THEIR_RECEPTORS	15	0.46617457	1.0709308	0.39811066	0.770406	1	4693	tags=40%, list=22%, signal=52%
BIOCARTA_KERATINOCYTE_PATHWAY	43	0.39443848	1.0707725	0.40068105	0.76971745	1	5342	tags=35%, list=26%, signal=47%
WP_HEPATOCYTE_GROWTH_FACTOR_RECEPTOR_SIGNALING	34	0.41075492	1.0700715	0.39114833	0.7707129	1	7737	tags=47%, list=37%, signal=75%
PID_HDAC_CLASSIII_PATHWAY	23	0.432337	1.0698898	0.4058899	0.7700701	1	28	tags=4%, list=0%, signal=4%
BIOCARTA_CALCINEURIN_PATHWAY	17	0.45950532	1.0696493	0.39425588	0.76963145	1	5240	tags=35%, list=25%, signal=47%
WP_VITAMIN_D_IN_INFLAMMATORY_DISEASES	22	0.44271782	1.069409	0.38403043	0.76915497	1	5342	tags=36%, list=26%, signal=49%
PID_CONE_PATHWAY	19	0.44899204	1.0688289	0.40343916	0.769726	1	2121	tags=16%, list=10%, signal=18%
REACTOME_O_LINKED_GLYCOSYLATION	107	0.36140934	1.0680376	0.36577868	0.77096087	1	4227	tags=24%, list=20%, signal=30%
BIOCARTA_MAPK_PATHWAY	78	0.37016484	1.0677572	0.36206895	0.77064437	1	4423	tags=21%, list=21%, signal=26%
KEGG_MELANOMA	67	0.3772768	1.067061	0.38579234	0.77153295	1	5699	tags=33%, list=27%, signal=45%
WP_COMPLEMENT_ACTIVATION	17	0.46316606	1.0670379	0.41466665	0.7704555	1	6202	tags=76%, list=30%, signal=109%
REACTOME_SYNTHESIS_OF_PIPS_AT_THE_PLASMA_MEMBRANE	53	0.3855807	1.0669527	0.4025974	0.7695754	1	5437	tags=21%, list=26%, signal=28%
WP_TGFBETA_SIGNALING_PATHWAY	129	0.35561934	1.0665629	0.35942328	0.76962715	1	5267	tags=25%, list=25%, signal=33%
WP_MFAP5_EFFECT_ON_PERMEABILITY_AND_MOTILITY_OF_ENDOTHELIAL_CELLS_VIA_CYTOSKELETON_REARRANGEMENT	18	0.45748815	1.0659095	0.40346205	0.77040905	1	7737	tags=50%, list=37%, signal=79%
REACTOME_SIGNALING_BY_EGFR	50	0.3825094	1.0655944	0.3826474	0.77025396	1	1949	tags=12%, list=9%, signal=13%
KEGG_LONG_TERM_DEPRESSION	63	0.37767524	1.065483	0.39447513	0.7694292	1	3689	tags=21%, list=18%, signal=25%
REACTOME_SHC_MEDIATED_CASCADE_FGFR1	17	0.46253672	1.064297	0.39648172	0.77174455	1	1728	tags=18%, list=8%, signal=19%
BIOCARTA_GPCR_PATHWAY	29	0.41748086	1.0624121	0.42171717	0.77611613	1	4528	tags=24%, list=22%, signal=31%
REACTOME_FRS_MEDIATED_FGFR3_SIGNALING	18	0.45191875	1.0617299	0.40152478	0.7769197	1	6349	tags=44%, list=30%, signal=64%
KEGG_ENDOCYTOSIS	177	0.34549016	1.0614562	0.37651822	0.7765775	1	4026	tags=18%, list=19%, signal=22%
PID_RET_PATHWAY	38	0.39636075	1.0608011	0.4054697	0.7773362	1	7737	tags=42%, list=37%, signal=67%
PID_BETA_CATENIN_NUC_PATHWAY	69	0.37040287	1.0601689	0.3911638	0.77812016	1	3577	tags=20%, list=17%, signal=24%
REACTOME_BBSOME_MEDIATED_CARGO_TARGETING_TO_CILIUM	23	0.4327116	1.0598044	0.4067164	0.7779793	1	816	tags=9%, list=4%, signal=9%
KEGG_PYRUVATE_METABOLISM	38	0.39505762	1.0586298	0.40070093	0.7801048	1	2259	tags=16%, list=11%, signal=18%
KEGG_PANTOTHENATE_AND_COA_BIOSYNTHESIS	15	0.47305486	1.0580649	0.42952126	0.78060657	1	168	tags=7%, list=1%, signal=7%
WP_KIT_RECEPTOR_SIGNALING_PATHWAY	59	0.3726569	1.0574818	0.39317182	0.78123164	1	4762	tags=31%, list=23%, signal=39%
BIOCARTA_NTHI_PATHWAY	23	0.43299168	1.0560873	0.40124223	0.7841379	1	5047	tags=35%, list=24%, signal=46%
KEGG_FC_GAMMA_R_MEDIATED_PHAGOCYTOSIS	94	0.36111936	1.053168	0.396875	0.79167145	1	5331	tags=30%, list=25%, signal=40%
WP_HOSTPATHOGEN_INTERACTION_OF_HUMAN_CORONAVIRUSES_MAPK_SIGNALING	36	0.40185156	1.0514793	0.4116959	0.795454	1	5713	tags=36%, list=27%, signal=50%
KEGG_B_CELL_RECEPTOR_SIGNALING_PATHWAY	73	0.36547995	1.0508429	0.41157556	0.79611915	1	4319	tags=26%, list=21%, signal=33%
WP_MICRORNAS_IN_CARDIOMYOCYTE_HYPERTROPHY	84	0.35589147	1.0506316	0.40588853	0.7955968	1	3689	tags=17%, list=18%, signal=20%
PID_NFKAPPAB_CANONICAL_PATHWAY	22	0.429503	1.0505912	0.4180645	0.7945777	1	4528	tags=32%, list=22%, signal=41%
REACTOME_SIGNALING_BY_NOTCH2	31	0.40878025	1.0499585	0.4189349	0.79526365	1	5994	tags=39%, list=29%, signal=54%
REACTOME_TRP_CHANNELS	26	0.4158432	1.0495167	0.42610836	0.7953353	1	4029	tags=27%, list=19%, signal=33%
WP_WNTBETACATENIN_SIGNALING_PATHWAY_IN_LEUKEMIA	25	0.43430394	1.0492499	0.41992435	0.7949737	1	2683	tags=16%, list=13%, signal=18%
WP_EBSTEINBARR_VIRUS_LMP1_SIGNALING	22	0.44179255	1.0476376	0.4163522	0.7984476	1	4319	tags=32%, list=21%, signal=40%
WP_PI3KAKTMTOR_SIGNALING_PATHWAY_AND_THERAPEUTIC_OPPORTUNITIES	30	0.41415828	1.0463687	0.42753622	0.800907	1	4948	tags=30%, list=24%, signal=39%
REACTOME_OPIOID_SIGNALLING	88	0.3564046	1.0440149	0.41577825	0.8067298	1	1413	tags=7%, list=7%, signal=7%
REACTOME_G_ALPHA_Q_SIGNALLING_EVENTS	182	0.34187448	1.0428371	0.42857143	0.808958	1	3903	tags=21%, list=19%, signal=25%
WP_GASTRIN_SIGNALING_PATHWAY	110	0.34948662	1.0420833	0.41207075	0.8100745	1	5635	tags=28%, list=27%, signal=38%
WP_MESODERMAL_COMMITMENT_PATHWAY	145	0.3443189	1.0411958	0.43061224	0.81148833	1	3934	tags=20%, list=19%, signal=24%
WP_TOLLLIKE_RECEPTOR_SIGNALING_PATHWAY	83	0.35383055	1.0406064	0.40870488	0.8120257	1	4319	tags=20%, list=21%, signal=26%
REACTOME_DOWNSTREAM_SIGNALING_OF_ACTIVATED_FGFR3	23	0.419327	1.0389884	0.43875	0.8156064	1	6349	tags=39%, list=30%, signal=56%
REACTOME_FLT3_SIGNALING_IN_DISEASE	28	0.41677153	1.037112	0.44044665	0.8199361	1	6716	tags=43%, list=32%, signal=63%
REACTOME_DISEASES_OF_METABOLISM	227	0.33666536	1.0346756	0.42454728	0.82581186	1	5024	tags=28%, list=24%, signal=36%
REACTOME_NEGATIVE_REGULATION_OF_THE_PI3K_AKT_NETWORK	104	0.34952664	1.0339411	0.42665288	0.8267835	1	5699	tags=33%, list=27%, signal=45%
KEGG_LONG_TERM_POTENTIATION	66	0.36506107	1.0338563	0.43934426	0.8258402	1	5963	tags=27%, list=29%, signal=38%
REACTOME_PURINERGIC_SIGNALING_IN_LEISHMANIASIS_INFECTION	25	0.41884574	1.0337168	0.437421	0.82508564	1	6135	tags=48%, list=29%, signal=68%
KEGG_STEROID_HORMONE_BIOSYNTHESIS	41	0.3863093	1.0330819	0.44367015	0.8257211	1	1825	tags=17%, list=9%, signal=19%
REACTOME_FRS_MEDIATED_FGFR1_SIGNALING	19	0.44541237	1.0329256	0.43426296	0.82500035	1	6285	tags=42%, list=30%, signal=60%
REACTOME_INFECTION_WITH_MYCOBACTERIUM_TUBERCULOSIS	26	0.41201395	1.032474	0.4398542	0.8251367	1	1627	tags=15%, list=8%, signal=17%
REACTOME_SIGNALING_BY_TGFB_FAMILY_MEMBERS	100	0.3529429	1.0320327	0.43186584	0.82530975	1	2708	tags=13%, list=13%, signal=15%
WP_IL6_SIGNALING_PATHWAY	41	0.38429508	1.0310541	0.42505854	0.82693607	1	2912	tags=15%, list=14%, signal=17%
REACTOME_TRAFFICKING_OF_GLUR2_CONTAINING_AMPA_RECEPTORS	17	0.4462439	1.0305601	0.46133682	0.827097	1	4528	tags=29%, list=22%, signal=38%
WP_ID_SIGNALING_PATHWAY	16	0.45506182	1.030466	0.44414893	0.82621753	1	28	tags=6%, list=0%, signal=6%
REACTOME_PRE_NOTCH_PROCESSING_IN_GOLGI	18	0.44507134	1.0290158	0.46124032	0.8290995	1	6156	tags=44%, list=29%, signal=63%
REACTOME_TP53_REGULATES_TRANSCRIPTION_OF_GENES_INVOLVED_IN_CYTOCHROME_C_RELEASE	18	0.44004086	1.0289282	0.4516129	0.828145	1	3255	tags=22%, list=16%, signal=26%
PID_PDGFRB_PATHWAY	127	0.34210297	1.0288044	0.44410256	0.82735336	1	2912	tags=10%, list=14%, signal=12%
KEGG_BLADDER_CANCER	42	0.38223097	1.0286369	0.44059977	0.8266973	1	3606	tags=26%, list=17%, signal=32%
REACTOME_PHASE_4_RESTING_MEMBRANE_POTENTIAL	16	0.43740678	1.0281482	0.44137022	0.8269159	1	4364	tags=31%, list=21%, signal=39%
BIOCARTA_EGF_PATHWAY	27	0.41353312	1.0279691	0.44226044	0.8262527	1	5342	tags=26%, list=26%, signal=35%
BIOCARTA_NUCLEARRS_PATHWAY	32	0.40039	1.0278856	0.46371463	0.8253482	1	2683	tags=28%, list=13%, signal=32%
WP_GDNFRET_SIGNALING_AXIS	22	0.42011034	1.0267489	0.45049506	0.8273855	1	3387	tags=18%, list=16%, signal=22%
REACTOME_CHOLESTEROL_BIOSYNTHESIS	24	0.40975076	1.0265172	0.4604768	0.82691485	1	58	tags=4%, list=0%, signal=4%
KEGG_CARDIAC_MUSCLE_CONTRACTION	67	0.36509538	1.0261959	0.45972073	0.82673794	1	5476	tags=31%, list=26%, signal=42%
REACTOME_NEUROTRANSMITTER_RECEPTORS_AND_POSTSYNAPTIC_SIGNAL_TRANSMISSION	191	0.33311903	1.0243315	0.43460765	0.8308544	1	3987	tags=20%, list=19%, signal=25%
REACTOME_PRESYNAPTIC_FUNCTION_OF_KAINATE_RECEPTORS	21	0.4217633	1.0233799	0.44849247	0.8323789	1	190	tags=5%, list=1%, signal=5%
WP_MELATONIN_METABOLISM_AND_EFFECTS	35	0.3880479	1.0232927	0.44166666	0.8314736	1	6335	tags=40%, list=30%, signal=57%
REACTOME_TBC_RABGAPS	43	0.37752682	1.0232142	0.45360824	0.8305328	1	6930	tags=47%, list=33%, signal=69%
KEGG_AMINO_SUGAR_AND_NUCLEOTIDE_SUGAR_METABOLISM	39	0.3830912	1.0231365	0.44235295	0.82960284	1	2738	tags=15%, list=13%, signal=18%
WP_MODULATORS_OF_TCR_SIGNALING_AND_T_CELL_ACTIVATION	57	0.36701176	1.0228626	0.4364035	0.8292406	1	4599	tags=28%, list=22%, signal=36%
PID_HNF3A_PATHWAY	38	0.3806644	1.0225753	0.44289044	0.8289251	1	3409	tags=21%, list=16%, signal=25%
REACTOME_CA2_PATHWAY	62	0.36263382	1.020693	0.46290144	0.8331383	1	3108	tags=11%, list=15%, signal=13%
WP_IMATINIB_AND_CHRONIC_MYELOID_LEUKEMIA	20	0.4325246	1.0204473	0.44757032	0.8327207	1	4807	tags=55%, list=23%, signal=71%
REACTOME_ACTIVATION_OF_NMDA_RECEPTORS_AND_POSTSYNAPTIC_EVENTS	91	0.34812063	1.0202078	0.47102213	0.83226484	1	3987	tags=23%, list=19%, signal=28%
PID_MAPK_TRK_PATHWAY	33	0.38976982	1.0194755	0.46071428	0.8332133	1	6114	tags=30%, list=29%, signal=43%
REACTOME_REGULATION_OF_GENE_EXPRESSION_IN_LATE_STAGE_BRANCHING_MORPHOGENESIS_PANCREATIC_BUD_PRECURSOR_CELLS	15	0.45824188	1.0189025	0.44927537	0.83367157	1	5343	tags=40%, list=26%, signal=54%
BIOCARTA_MET_PATHWAY	33	0.39728275	1.0185001	0.4496487	0.83369565	1	7737	tags=45%, list=37%, signal=72%
WP_CHOLESTEROL_METABOLISM_WITH_BLOCH_AND_KANDUTSCHRUSSELL_PATHWAYS	46	0.37353963	1.0179989	0.43283582	0.8339968	1	2307	tags=13%, list=11%, signal=15%
REACTOME_PI_3K_CASCADE_FGFR2	19	0.42288598	1.017917	0.4636724	0.833129	1	4158	tags=26%, list=20%, signal=33%
REACTOME_SHC_MEDIATED_CASCADE_FGFR3	16	0.44463482	1.017827	0.4341398	0.832221	1	6349	tags=44%, list=30%, signal=63%
REACTOME_RORA_ACTIVATES_GENE_EXPRESSION	17	0.4336772	1.0162584	0.46248296	0.83539003	1	209	tags=6%, list=1%, signal=6%
REACTOME_INTEGRATION_OF_ENERGY_METABOLISM	102	0.34283665	1.0128231	0.47242457	0.84369874	1	3996	tags=17%, list=19%, signal=21%
SIG_PIP3_SIGNALING_IN_B_LYMPHOCYTES	34	0.38357085	1.0127366	0.46975088	0.842785	1	4979	tags=29%, list=24%, signal=39%
REACTOME_SIGNALING_BY_FLT3_ITD_AND_TKD_MUTANTS	16	0.4444679	1.0118908	0.4741036	0.8440026	1	6285	tags=38%, list=30%, signal=54%
REACTOME_SCAVENGING_BY_CLASS_A_RECEPTORS	18	0.42978933	1.0107551	0.47532466	0.8460368	1	4614	tags=56%, list=22%, signal=71%
PID_SYNDECAN_3_PATHWAY	16	0.4463734	1.0104414	0.48335552	0.84575045	1	6826	tags=50%, list=33%, signal=74%
PID_GLYPICAN_1PATHWAY	25	0.41054818	1.0092776	0.47919294	0.84786963	1	5481	tags=32%, list=26%, signal=43%
WP_FIBRIN_COMPLEMENT_RECEPTOR_3_SIGNALING_PATHWAY	40	0.37807634	1.0088173	0.46878546	0.848039	1	4683	tags=28%, list=22%, signal=35%
WP_TYPE_II_INTERFERON_SIGNALING_IFNG	31	0.38446125	1.0068625	0.47517732	0.85225	1	1968	tags=16%, list=9%, signal=18%
REACTOME_RND3_GTPASE_CYCLE	41	0.3778698	1.0067799	0.47522524	0.8513297	1	5391	tags=24%, list=26%, signal=33%
REACTOME_HEPARAN_SULFATE_HEPARIN_HS_GAG_METABOLISM	54	0.3662502	1.0065429	0.47879463	0.85083413	1	5256	tags=33%, list=25%, signal=44%
WP_MAPK_CASCADE	32	0.3913631	1.0061672	0.46411484	0.8507206	1	6285	tags=28%, list=30%, signal=40%
PID_ERBB2_ERBB3_PATHWAY	44	0.36724022	1.0059514	0.47161067	0.85016805	1	2382	tags=14%, list=11%, signal=15%
REACTOME_SYNTHESIS_OF_IP3_AND_IP4_IN_THE_CYTOSOL	25	0.40550113	1.003082	0.49812266	0.85670745	1	4150	tags=24%, list=20%, signal=30%
REACTOME_SIGNALING_BY_INSULIN_RECEPTOR	71	0.35204336	1.0018791	0.4895719	0.85889524	1	4158	tags=21%, list=20%, signal=26%
REACTOME_BASIGIN_INTERACTIONS	25	0.40147355	1.0014347	0.49627793	0.85901123	1	2473	tags=24%, list=12%, signal=27%
REACTOME_MAPK_FAMILY_SIGNALING_CASCADES	304	0.32152715	1.0007553	0.5035035	0.8597633	1	3777	tags=20%, list=18%, signal=25%
WP_P38_MAPK_SIGNALING_PATHWAY	34	0.38206595	1.0006968	0.48574823	0.8587817	1	5342	tags=26%, list=26%, signal=35%
REACTOME_HEME_SIGNALING	44	0.37135002	1.0006129	0.48561564	0.8578964	1	1639	tags=11%, list=8%, signal=12%
REACTOME_RAB_GERANYLGERANYLATION	63	0.35084394	1.0000759	0.49343544	0.8582083	1	6105	tags=29%, list=29%, signal=40%
REACTOME_CARGO_TRAFFICKING_TO_THE_PERICILIARY_MEMBRANE	49	0.3644233	0.9999839	0.50800914	0.85733247	1	816	tags=6%, list=4%, signal=6%
REACTOME_GABA_B_RECEPTOR_ACTIVATION	42	0.36941737	0.9998842	0.49364161	0.8564673	1	396	tags=5%, list=2%, signal=5%
WP_RESISTIN_AS_A_REGULATOR_OF_INFLAMMATION	31	0.3888781	0.99737674	0.49280575	0.86205405	1	4979	tags=32%, list=24%, signal=42%
WP_COMPLEMENT_SYSTEM_IN_NEURONAL_DEVELOPMENT_AND_PLASTICITY	96	0.33866554	0.9958567	0.5099895	0.8651183	1	7238	tags=48%, list=35%, signal=73%
SIG_INSULIN_RECEPTOR_PATHWAY_IN_CARDIAC_MYOCYTES	50	0.3562344	0.9941179	0.479638	0.868608	1	5221	tags=22%, list=25%, signal=29%
REACTOME_SIGNALING_BY_VEGF	104	0.3345808	0.9933851	0.5047022	0.8694913	1	5478	tags=28%, list=26%, signal=38%
BIOCARTA_PPARA_PATHWAY	47	0.37135503	0.9920923	0.4892412	0.8718087	1	4528	tags=26%, list=22%, signal=33%
REACTOME_TIGHT_JUNCTION_INTERACTIONS	26	0.39630195	0.9901385	0.5081149	0.87600535	1	5014	tags=38%, list=24%, signal=51%
BIOCARTA_P38MAPK_PATHWAY	36	0.37823027	0.9894436	0.49586776	0.87671345	1	5342	tags=25%, list=26%, signal=34%
REACTOME_TRAFFICKING_OF_AMPA_RECEPTORS	29	0.39037165	0.9874144	0.5023866	0.88108146	1	4528	tags=24%, list=22%, signal=31%
REACTOME_ACYL_CHAIN_REMODELLING_OF_PC	22	0.41188893	0.9868594	0.50189155	0.88148296	1	5396	tags=41%, list=26%, signal=55%
KEGG_VEGF_SIGNALING_PATHWAY	69	0.34606975	0.9862893	0.51284796	0.8818831	1	4528	tags=23%, list=22%, signal=29%
BIOCARTA_CSK_PATHWAY	18	0.41925973	0.98598856	0.49097937	0.8815313	1	3581	tags=28%, list=17%, signal=33%
WP_IL7_SIGNALING_PATHWAY	24	0.40152466	0.98540395	0.5325	0.88196564	1	3201	tags=17%, list=15%, signal=20%
KEGG_MTOR_SIGNALING_PATHWAY	50	0.35815436	0.9849732	0.52193475	0.882047	1	4979	tags=26%, list=24%, signal=34%
PID_FAK_PATHWAY	59	0.34934062	0.98435694	0.5247525	0.8825357	1	8435	tags=44%, list=40%, signal=74%
REACTOME_O_LINKED_GLYCOSYLATION_OF_MUCINS	59	0.3520235	0.9842999	0.5167568	0.8815613	1	2372	tags=15%, list=11%, signal=17%
WP_SARSCOV2_INNATE_IMMUNITY_EVASION_AND_CELLSPECIFIC_IMMUNE_RESPONSE	60	0.34646574	0.98350227	0.5044843	0.8825079	1	3973	tags=20%, list=19%, signal=25%
REACTOME_SIGNALING_BY_SCF_KIT	42	0.36391047	0.98348445	0.50523865	0.8814258	1	2602	tags=19%, list=12%, signal=22%
PID_LYMPH_ANGIOGENESIS_PATHWAY	25	0.39963692	0.98275495	0.50617284	0.88220495	1	1774	tags=16%, list=8%, signal=17%
PID_BCR_5PATHWAY	63	0.34465036	0.9822343	0.5301866	0.88244253	1	2525	tags=14%, list=12%, signal=16%
REACTOME_SIGNALING_BY_ALK	27	0.38932726	0.98179114	0.5079559	0.8824937	1	1032	tags=7%, list=5%, signal=8%
WP_STING_PATHWAY_IN_KAWASAKILIKE_DISEASE_AND_COVID19	20	0.41053244	0.9816173	0.49352333	0.88180023	1	4319	tags=35%, list=21%, signal=44%
REACTOME_THE_CANONICAL_RETINOID_CYCLE_IN_RODS_TWILIGHT_VISION	18	0.4159499	0.98156947	0.50402147	0.88080287	1	4174	tags=39%, list=20%, signal=49%
REACTOME_PROTEIN_PROTEIN_INTERACTIONS_AT_SYNAPSES	87	0.33527607	0.97891706	0.53571427	0.88649523	1	6836	tags=43%, list=33%, signal=63%
PID_NFKAPPAB_ATYPICAL_PATHWAY	16	0.42106938	0.9782653	0.51312333	0.8870353	1	7638	tags=44%, list=37%, signal=69%
REACTOME_GAP_JUNCTION_TRAFFICKING_AND_REGULATION	46	0.35748637	0.9776051	0.52828056	0.88768655	1	3276	tags=26%, list=16%, signal=31%
PID_NOTCH_PATHWAY	57	0.35651556	0.9773597	0.5322034	0.8871874	1	5519	tags=30%, list=26%, signal=40%
REACTOME_NICOTINAMIDE_SALVAGING	18	0.41742152	0.9772821	0.5052493	0.88628566	1	5160	tags=39%, list=25%, signal=52%
REACTOME_DETOXIFICATION_OF_REACTIVE_OXYGEN_SPECIES	34	0.37589136	0.9767081	0.50493824	0.8866509	1	3861	tags=26%, list=18%, signal=32%
WP_NOTCH_SIGNALING_PATHWAY	61	0.35252982	0.9763695	0.5265958	0.8864274	1	5611	tags=33%, list=27%, signal=45%
REACTOME_THE_NLRP3_INFLAMMASOME	16	0.42786717	0.97510445	0.520436	0.88859755	1	7167	tags=63%, list=34%, signal=95%
PID_ARF6_TRAFFICKING_PATHWAY	46	0.35917655	0.974963	0.5311778	0.88782096	1	6879	tags=39%, list=33%, signal=58%
REACTOME_SIGNALING_BY_NOTCH1	71	0.34065992	0.9747339	0.537797	0.8873295	1	7029	tags=41%, list=34%, signal=61%
KEGG_CITRATE_CYCLE_TCA_CYCLE	28	0.3832954	0.9737617	0.5186972	0.8886583	1	26	tags=4%, list=0%, signal=4%
REACTOME_VEGFR2_MEDIATED_CELL_PROLIFERATION	19	0.41280004	0.9730491	0.5160858	0.8894421	1	6771	tags=37%, list=32%, signal=54%
REACTOME_SIGNALING_BY_NTRK2_TRKB	25	0.39014697	0.9725836	0.53333336	0.8895914	1	6285	tags=32%, list=30%, signal=46%
REACTOME_PLASMA_LIPOPROTEIN_CLEARANCE	32	0.375145	0.97229594	0.52219623	0.8892117	1	1946	tags=13%, list=9%, signal=14%
REACTOME_SIGNALING_BY_NUCLEAR_RECEPTORS	228	0.31708428	0.9719759	0.5846774	0.8889134	1	2940	tags=14%, list=14%, signal=17%
WP_OXIDATION_BY_CYTOCHROME_P450	52	0.35101393	0.9711873	0.54697984	0.88983005	1	2410	tags=17%, list=12%, signal=20%
REACTOME_COBALAMIN_CBL_VITAMIN_B12_TRANSPORT_AND_METABOLISM	16	0.43044412	0.9703078	0.530137	0.8909237	1	1946	tags=19%, list=9%, signal=21%
REACTOME_RESPONSE_OF_EIF2AK4_GCN2_TO_AMINO_ACID_DEFICIENCY	97	0.33031282	0.9701584	0.56782335	0.89020723	1	10053	tags=74%, list=48%, signal=142%
WP_HEPATITIS_B_INFECTION	135	0.32409316	0.9691589	0.5587629	0.89168274	1	5342	tags=26%, list=26%, signal=35%
WP_ALPHA_6_BETA_4_SIGNALING_PATHWAY	33	0.3690309	0.96896774	0.53670275	0.89104384	1	7737	tags=42%, list=37%, signal=67%
REACTOME_AQUAPORIN_MEDIATED_TRANSPORT	47	0.35458696	0.96891296	0.5286697	0.8900984	1	5239	tags=23%, list=25%, signal=31%
WP_MEASLES_VIRUS_INFECTION	113	0.32764512	0.9688032	0.55693585	0.8892701	1	4319	tags=23%, list=21%, signal=29%
REACTOME_RESPONSE_OF_MTB_TO_PHAGOCYTOSIS	22	0.39609548	0.9687091	0.5135834	0.8884143	1	1627	tags=14%, list=8%, signal=15%
WP_SMALL_LIGAND_GPCRS	16	0.4261088	0.9664713	0.52717394	0.8928961	1	5007	tags=38%, list=24%, signal=49%
REACTOME_NOTCH3_INTRACELLULAR_DOMAIN_REGULATES_TRANSCRIPTION	25	0.3934531	0.9656919	0.5244055	0.8938331	1	3130	tags=24%, list=15%, signal=28%
REACTOME_CYTOCHROME_P450_ARRANGED_BY_SUBSTRATE_TYPE	57	0.34026706	0.96460986	0.54505974	0.895441	1	2585	tags=18%, list=12%, signal=20%
REACTOME_REGULATION_OF_TNFR1_SIGNALING	35	0.37013298	0.9629778	0.53609467	0.89836735	1	1507	tags=11%, list=7%, signal=12%
WP_PREIMPLANTATION_EMBRYO	46	0.347471	0.9616018	0.540724	0.90084517	1	3280	tags=24%, list=16%, signal=28%
REACTOME_REGULATION_OF_KIT_SIGNALING	16	0.41804695	0.9612503	0.52785146	0.90061885	1	6682	tags=50%, list=32%, signal=73%
PID_CIRCADIAN_PATHWAY	15	0.42313412	0.96084905	0.5337838	0.9005272	1	1809	tags=20%, list=9%, signal=22%
SIG_CD40PATHWAYMAP	34	0.37006968	0.95997125	0.5424312	0.9015488	1	4649	tags=26%, list=22%, signal=34%
WP_ECTODERM_DIFFERENTIATION	131	0.31876957	0.95842624	0.5728848	0.90439636	1	4667	tags=21%, list=22%, signal=27%
REACTOME_FGFR1_MUTANT_RECEPTOR_ACTIVATION	27	0.3832308	0.9582965	0.5374396	0.9036424	1	5699	tags=33%, list=27%, signal=46%
WP_OXYSTEROLS_DERIVED_FROM_CHOLESTEROL	38	0.35408446	0.9577076	0.53616536	0.90398616	1	4782	tags=29%, list=23%, signal=37%
REACTOME_SIGNALING_BY_NOTCH1_PEST_DOMAIN_MUTANTS_IN_CANCER	56	0.3400475	0.9559214	0.5565217	0.90745276	1	7029	tags=39%, list=34%, signal=59%
WP_PDGF_PATHWAY	39	0.3640089	0.95575625	0.56401384	0.90673137	1	2382	tags=13%, list=11%, signal=14%
REACTOME_GLYCOSAMINOGLYCAN_METABOLISM	121	0.3177506	0.95490414	0.5800821	0.90775895	1	5964	tags=34%, list=29%, signal=47%
KEGG_VIBRIO_CHOLERAE_INFECTION	51	0.34468	0.95360637	0.57158834	0.9098438	1	5022	tags=27%, list=24%, signal=36%
PID_WNT_NONCANONICAL_PATHWAY	31	0.37183893	0.953389	0.5511714	0.9092519	1	6771	tags=29%, list=32%, signal=43%
REACTOME_ACTIVATED_NOTCH1_TRANSMITS_SIGNAL_TO_THE_NUCLEUS	30	0.37770194	0.95310324	0.54642856	0.90888655	1	6898	tags=43%, list=33%, signal=65%
REACTOME_NEGATIVE_REGULATION_OF_FLT3	15	0.4306381	0.95309263	0.5431607	0.9078128	1	5184	tags=33%, list=25%, signal=44%
WP_LIPID_METABOLISM_PATHWAY	27	0.3806677	0.9530742	0.5584256	0.9067634	1	2023	tags=15%, list=10%, signal=16%
PID_NETRIN_PATHWAY	32	0.36949345	0.95266277	0.5531661	0.90663266	1	9760	tags=66%, list=47%, signal=123%
WP_NUCLEAR_RECEPTORS_IN_LIPID_METABOLISM_AND_TOXICITY	31	0.37282208	0.9521578	0.5366748	0.90684974	1	2683	tags=26%, list=13%, signal=30%
KEGG_NEUROTROPHIN_SIGNALING_PATHWAY	121	0.31712255	0.9520499	0.574359	0.906023	1	5342	tags=24%, list=26%, signal=32%
WP_1Q211_COPY_NUMBER_VARIATION_SYNDROME	25	0.3768614	0.95107603	0.5389447	0.90726274	1	7119	tags=48%, list=34%, signal=73%
WP_PDGFRBETA_PATHWAY	29	0.37248215	0.9510438	0.54282266	0.9062562	1	4528	tags=21%, list=22%, signal=26%
BIOCARTA_IL2RB_PATHWAY	35	0.36503324	0.9505938	0.54876614	0.9062938	1	1327	tags=9%, list=6%, signal=9%
BIOCARTA_VIP_PATHWAY	25	0.38944462	0.9501028	0.56179774	0.9064226	1	5342	tags=32%, list=26%, signal=43%
REACTOME_SPHINGOLIPID_DE_NOVO_BIOSYNTHESIS	42	0.35383263	0.9493443	0.5583239	0.90718514	1	2437	tags=12%, list=12%, signal=13%
REACTOME_FCGR3A_MEDIATED_IL10_SYNTHESIS	35	0.36420783	0.9475265	0.5627198	0.910535	1	3581	tags=14%, list=17%, signal=17%
BIOCARTA_MEF2D_PATHWAY	18	0.403266	0.9474276	0.5340454	0.9097112	1	4529	tags=33%, list=22%, signal=43%
REACTOME_SIGNALING_BY_NOTCH3	49	0.34669217	0.94673264	0.5738255	0.9102994	1	3135	tags=20%, list=15%, signal=24%
BIOCARTA_NOS1_PATHWAY	20	0.39597067	0.94566405	0.54270697	0.911777	1	4528	tags=30%, list=22%, signal=38%
REACTOME_FRS_MEDIATED_FGFR2_SIGNALING	21	0.39771414	0.9445801	0.57421875	0.9132805	1	6349	tags=38%, list=30%, signal=55%
PID_BMP_PATHWAY	41	0.34820697	0.9442187	0.5505747	0.9130882	1	4458	tags=20%, list=21%, signal=25%
PID_RHOA_REG_PATHWAY	46	0.34599718	0.9438822	0.56416184	0.91282856	1	5947	tags=33%, list=28%, signal=45%
PID_ECADHERIN_STABILIZATION_PATHWAY	41	0.3538433	0.9438272	0.58656037	0.911893	1	1949	tags=10%, list=9%, signal=11%
BIOCARTA_FCER1_PATHWAY	38	0.3506958	0.9424706	0.56062424	0.914106	1	5342	tags=24%, list=26%, signal=32%
REACTOME_LATE_ENDOSOMAL_MICROAUTOPHAGY	32	0.3648378	0.9392608	0.58064514	0.9206824	1	2168	tags=13%, list=10%, signal=14%
REACTOME_DOWNSTREAM_SIGNALING_OF_ACTIVATED_FGFR2	26	0.37487233	0.9386921	0.5605493	0.9209451	1	6349	tags=35%, list=30%, signal=50%
BIOCARTA_COMP_PATHWAY	15	0.41170558	0.93809617	0.5602165	0.92130905	1	4136	tags=60%, list=20%, signal=75%
REACTOME_FCGAMMA_RECEPTOR_FCGR_DEPENDENT_PHAGOCYTOSIS	83	0.3206983	0.9378589	0.59157896	0.9208284	1	5478	tags=28%, list=26%, signal=37%
KEGG_SPHINGOLIPID_METABOLISM	37	0.35621783	0.93681556	0.59741783	0.922263	1	2437	tags=11%, list=12%, signal=12%
KEGG_GAP_JUNCTION	87	0.32007098	0.93584955	0.6059322	0.92358047	1	3276	tags=21%, list=16%, signal=24%
WP_RANKLRANK_SIGNALING_PATHWAY	54	0.33861798	0.9356663	0.60022146	0.92291474	1	4762	tags=26%, list=23%, signal=33%
REACTOME_SIGNALLING_TO_ERKS	33	0.36099514	0.93380505	0.5669014	0.92626715	1	6285	tags=30%, list=30%, signal=43%
BIOCARTA_SPPA_PATHWAY	16	0.40855345	0.9329574	0.57277626	0.9272031	1	5068	tags=38%, list=24%, signal=49%
REACTOME_PIWI_INTERACTING_RNA_PIRNA_BIOGENESIS	28	0.37335148	0.9320966	0.57758623	0.9282198	1	2966	tags=21%, list=14%, signal=25%
REACTOME_TOLL_LIKE_RECEPTOR_CASCADES	150	0.3076755	0.9319025	0.65858585	0.9275949	1	5184	tags=22%, list=25%, signal=29%
REACTOME_RHO_GTPASES_ACTIVATE_WASPS_AND_WAVES	36	0.35403094	0.9310299	0.5784431	0.92851835	1	5338	tags=28%, list=26%, signal=37%
WP_THERMOGENESIS	103	0.31636184	0.930744	0.60292584	0.9281055	1	5049	tags=21%, list=24%, signal=28%
REACTOME_SMAD2_SMAD3_SMAD4_HETEROTRIMER_REGULATES_TRANSCRIPTION	31	0.36008456	0.92912036	0.5756501	0.9308197	1	1303	tags=10%, list=6%, signal=10%
PID_THROMBIN_PAR4_PATHWAY	15	0.42094857	0.92896974	0.584	0.93009305	1	3487	tags=20%, list=17%, signal=24%
REACTOME_G_ALPHA_12_13_SIGNALLING_EVENTS	78	0.3198109	0.92811817	0.6288118	0.9310005	1	6441	tags=31%, list=31%, signal=44%
PID_INTEGRIN5_PATHWAY	16	0.40668878	0.9277461	0.5755208	0.9308391	1	5137	tags=44%, list=25%, signal=58%
PID_EPO_PATHWAY	33	0.35955954	0.92773855	0.5937122	0.9297782	1	3482	tags=18%, list=17%, signal=22%
REACTOME_PI_METABOLISM	84	0.32096827	0.92752117	0.6098081	0.92924726	1	5437	tags=20%, list=26%, signal=27%
REACTOME_TOLL_LIKE_RECEPTOR_9_TLR9_CASCADE	93	0.3149996	0.9270563	0.61945033	0.92924607	1	5342	tags=24%, list=26%, signal=32%
REACTOME_SIGNALLING_TO_RAS	20	0.38926816	0.926762	0.5640051	0.9288661	1	4014	tags=25%, list=19%, signal=31%
WP_INTERLEUKIN1_IL1_STRUCTURAL_PATHWAY	49	0.33996934	0.92426544	0.58956915	0.93352926	1	5342	tags=24%, list=26%, signal=33%
REACTOME_SIGNALING_BY_FGFR1_IN_DISEASE	34	0.3549204	0.9239755	0.58669835	0.9331291	1	6285	tags=32%, list=30%, signal=46%
REACTOME_TOLL_LIKE_RECEPTOR_TLR1_TLR2_CASCADE	101	0.31135416	0.9239624	0.6471204	0.9320682	1	5342	tags=23%, list=26%, signal=30%
REACTOME_DOWNSTREAM_SIGNAL_TRANSDUCTION	29	0.36377832	0.92101705	0.586747	0.9377227	1	3482	tags=17%, list=17%, signal=21%
BIOCARTA_MTA3_PATHWAY	18	0.39118454	0.9209881	0.59014267	0.93670267	1	4953	tags=33%, list=24%, signal=44%
REACTOME_TIE2_SIGNALING	18	0.39209393	0.92056334	0.5948052	0.9366196	1	3165	tags=22%, list=15%, signal=26%
REACTOME_SLC_TRANSPORTER_DISORDERS	88	0.31636122	0.91906035	0.6459431	0.93903923	1	3704	tags=22%, list=18%, signal=26%
WP_SPHINGOLIPID_PATHWAY	28	0.3594845	0.9177014	0.6166868	0.94107497	1	112	tags=4%, list=1%, signal=4%
REACTOME_VASOPRESSIN_REGULATES_RENAL_WATER_HOMEOSTASIS_VIA_AQUAPORINS	40	0.34539297	0.91517586	0.6258503	0.94580495	1	396	tags=5%, list=2%, signal=5%
REACTOME_RAB_REGULATION_OF_TRAFFICKING	118	0.30464	0.9136897	0.6656315	0.94810665	1	6423	tags=31%, list=31%, signal=44%
REACTOME_EPH_EPHRIN_SIGNALING	92	0.30843106	0.91295713	0.6511628	0.9486655	1	7173	tags=30%, list=34%, signal=46%
PID_AR_NONGENOMIC_PATHWAY	31	0.35637873	0.91231096	0.6260258	0.94904405	1	2382	tags=10%, list=11%, signal=11%
REACTOME_P75NTR_SIGNALS_VIA_NF_KB	16	0.3968975	0.90877664	0.5849057	0.9559296	1	5184	tags=31%, list=25%, signal=42%
REACTOME_ASSEMBLY_OF_THE_HIV_VIRION	16	0.39857197	0.9082394	0.59973407	0.9561026	1	844	tags=6%, list=4%, signal=7%
WP_VEGFAVEGFR2_SIGNALING_PATHWAY	426	0.29065013	0.9056572	0.804	0.9607435	1	3790	tags=16%, list=18%, signal=20%
BIOCARTA_PYK2_PATHWAY	27	0.3632844	0.90542364	0.61595094	0.9602251	1	5342	tags=26%, list=26%, signal=35%
REACTOME_DAG_AND_IP3_SIGNALING	40	0.33088976	0.9040185	0.633218	0.9623317	1	5331	tags=25%, list=25%, signal=33%
REACTOME_SIGNALING_BY_FGFR3	38	0.34247056	0.90364975	0.6343714	0.9620569	1	6349	tags=32%, list=30%, signal=45%
WP_TYPE_II_DIABETES_MELLITUS	20	0.37636203	0.9030458	0.58236057	0.9623007	1	6771	tags=45%, list=32%, signal=66%
WP_OXIDATIVE_DAMAGE_RESPONSE	37	0.34216696	0.9024823	0.6121718	0.9624622	1	3972	tags=27%, list=19%, signal=33%
REACTOME_SIGNALING_BY_FGFR4	38	0.33732912	0.90190613	0.62020904	0.96259975	1	6349	tags=29%, list=30%, signal=41%
WP_SPHINGOLIPID_METABOLISM_OVERVIEW	22	0.37188047	0.9014981	0.605598	0.9624451	1	4198	tags=18%, list=20%, signal=23%
REACTOME_DOWNREGULATION_OF_SMAD2_3_SMAD4_TRANSCRIPTIONAL_ACTIVITY	28	0.35850823	0.9005583	0.63226575	0.9634254	1	5352	tags=29%, list=26%, signal=38%
REACTOME_G_PROTEIN_MEDIATED_EVENTS	52	0.32489234	0.89936	0.64483905	0.9649654	1	2529	tags=12%, list=12%, signal=13%
WP_B_CELL_RECEPTOR_SIGNALING_PATHWAY	97	0.30606157	0.89845234	0.6967809	0.9658373	1	6053	tags=31%, list=29%, signal=43%
WP_FGFR3_SIGNALING_IN_CHONDROCYTE_PROLIFERATION_AND_TERMINAL_DIFFERENTIATION	27	0.3572957	0.89839023	0.63493973	0.96486974	1	4339	tags=26%, list=21%, signal=33%
WP_HOSTPATHOGEN_INTERACTION_OF_HUMAN_CORONAVIRUSES_APOPTOSIS	19	0.37649035	0.8983192	0.6	0.96397704	1	3121	tags=21%, list=15%, signal=25%
REACTOME_NEGATIVE_REGULATION_OF_FGFR1_SIGNALING	29	0.35401875	0.8976342	0.62026864	0.9644368	1	1728	tags=10%, list=8%, signal=11%
REACTOME_VXPX_CARGO_TARGETING_TO_CILIUM	19	0.38282302	0.89518946	0.6264591	0.96863246	1	458	tags=5%, list=2%, signal=5%
PID_TCPTP_PATHWAY	41	0.33259398	0.89462864	0.64343786	0.9688164	1	2912	tags=20%, list=14%, signal=23%
WP_ENDOMETRIAL_CANCER	61	0.3188383	0.89454967	0.66922235	0.96789193	1	2691	tags=13%, list=13%, signal=15%
BIOCARTA_ETS_PATHWAY	17	0.3797171	0.894139	0.61260056	0.9677239	1	2692	tags=29%, list=13%, signal=34%
PID_IL3_PATHWAY	24	0.3631317	0.89382565	0.60465115	0.96732306	1	1366	tags=8%, list=7%, signal=9%
KEGG_VASCULAR_SMOOTH_MUSCLE_CONTRACTION	104	0.30139694	0.89281124	0.6919875	0.968412	1	7432	tags=43%, list=36%, signal=67%
REACTOME_DOWNSTREAM_SIGNALING_OF_ACTIVATED_FGFR1	27	0.35726646	0.8923829	0.6351351	0.96828794	1	6285	tags=33%, list=30%, signal=48%
REACTOME_ADHERENS_JUNCTIONS_INTERACTIONS	32	0.33965048	0.8922461	0.6231884	0.9674914	1	7119	tags=38%, list=34%, signal=57%
PID_AJDISS_2PATHWAY	47	0.33072838	0.89206415	0.6727899	0.9668203	1	7499	tags=38%, list=36%, signal=60%
KEGG_ARGININE_AND_PROLINE_METABOLISM	52	0.32442418	0.8915529	0.6475771	0.96686697	1	3416	tags=27%, list=16%, signal=32%
REACTOME_NRAGE_SIGNALS_DEATH_THROUGH_JNK	58	0.31886965	0.8906957	0.65436244	0.9676449	1	7894	tags=43%, list=38%, signal=69%
REACTOME_PYRUVATE_METABOLISM_AND_CITRIC_ACID_TCA_CYCLE	53	0.32003534	0.8899375	0.6501687	0.9681496	1	1362	tags=9%, list=7%, signal=10%
PID_TGFBR_PATHWAY	53	0.3130572	0.8890981	0.6450168	0.968832	1	9053	tags=49%, list=43%, signal=86%
WP_EGFEGFR_SIGNALING_PATHWAY	158	0.29310077	0.8887004	0.7184959	0.9686015	1	4810	tags=21%, list=23%, signal=27%
REACTOME_ERK_MAPK_TARGETS	22	0.3623984	0.88820386	0.6348808	0.96855366	1	4772	tags=23%, list=23%, signal=29%
REACTOME_POTENTIAL_THERAPEUTICS_FOR_SARS	84	0.30524132	0.887252	0.6879659	0.96948564	1	1769	tags=10%, list=8%, signal=10%
WP_ARYL_HYDROCARBON_RECEPTOR_PATHWAY_WP2873	37	0.3348318	0.88710594	0.6522754	0.9687488	1	3201	tags=24%, list=15%, signal=29%
KEGG_GLIOMA	62	0.31065628	0.8866228	0.657489	0.9687095	1	5240	tags=31%, list=25%, signal=41%
REACTOME_INTERLEUKIN_7_SIGNALING	22	0.36611196	0.88612616	0.6369427	0.9687035	1	3237	tags=18%, list=15%, signal=21%
PID_TAP63_PATHWAY	51	0.32276228	0.88597304	0.66445917	0.96800137	1	3249	tags=16%, list=16%, signal=19%
REACTOME_COSTIMULATION_BY_THE_CD28_FAMILY	60	0.31295013	0.8855272	0.6813778	0.96785367	1	5076	tags=25%, list=24%, signal=33%
WP_NONSMALL_CELL_LUNG_CANCER	70	0.31101176	0.88529307	0.68421054	0.96731514	1	5456	tags=29%, list=26%, signal=39%
REACTOME_N_GLYCAN_ANTENNAE_ELONGATION	15	0.39597633	0.8849961	0.641129	0.9668388	1	560	tags=7%, list=3%, signal=7%
REACTOME_MEIOTIC_SYNAPSIS	31	0.3435111	0.884951	0.64285713	0.96588045	1	1428	tags=10%, list=7%, signal=10%
REACTOME_CRMPS_IN_SEMA3A_SIGNALING	16	0.38639688	0.8844558	0.6310811	0.9658808	1	2675	tags=19%, list=13%, signal=21%
REACTOME_METABOLISM_OF_VITAMINS_AND_COFACTORS	177	0.28851628	0.8840088	0.73380566	0.9657315	1	1710	tags=9%, list=8%, signal=10%
REACTOME_ACTIVATION_OF_KAINATE_RECEPTORS_UPON_GLUTAMATE_BINDING	30	0.33656496	0.88229555	0.61800486	0.96825147	1	6190	tags=27%, list=30%, signal=38%
KEGG_TYROSINE_METABOLISM	40	0.33022603	0.8822499	0.64523536	0.9672955	1	3252	tags=20%, list=16%, signal=24%
REACTOME_FATTY_ACID_METABOLISM	170	0.2893887	0.8804116	0.7532861	0.9700516	1	2562	tags=11%, list=12%, signal=13%
PID_EPHA2_FWD_PATHWAY	19	0.37046117	0.8798866	0.6356589	0.97009313	1	2414	tags=11%, list=12%, signal=12%
REACTOME_ANTIGEN_PRESENTATION_FOLDING_ASSEMBLY_AND_PEPTIDE_LOADING_OF_CLASS_I_MHC	25	0.36014906	0.8786873	0.65957445	0.97148013	1	3534	tags=24%, list=17%, signal=29%
REACTOME_COPII_MEDIATED_VESICLE_TRANSPORT	65	0.31164417	0.8786352	0.6879121	0.9705331	1	4222	tags=17%, list=20%, signal=21%
REACTOME_DOWNREGULATION_OF_TGF_BETA_RECEPTOR_SIGNALING	26	0.3524283	0.87752587	0.6562889	0.97177136	1	5184	tags=31%, list=25%, signal=41%
KEGG_FC_EPSILON_RI_SIGNALING_PATHWAY	67	0.30944008	0.8771718	0.68736386	0.9714393	1	5478	tags=31%, list=26%, signal=42%
REACTOME_INTERLEUKIN_17_SIGNALING	67	0.30798712	0.87673664	0.67105263	0.9712547	1	2619	tags=12%, list=13%, signal=14%
REACTOME_RHO_GTPASES_ACTIVATE_NADPH_OXIDASES	22	0.36316764	0.8750592	0.64742786	0.97359544	1	4528	tags=32%, list=22%, signal=41%
WP_ENDOTHELIN_PATHWAYS	32	0.34101805	0.8739884	0.6730769	0.9747091	1	5288	tags=34%, list=25%, signal=46%
REACTOME_NEGATIVE_REGULATION_OF_FGFR4_SIGNALING	28	0.3507084	0.87320536	0.65	0.9752526	1	6349	tags=29%, list=30%, signal=41%
WP_NEURODEGENERATION_WITH_BRAIN_IRON_ACCUMULATION_NBIA_SUBTYPES_PATHWAY	43	0.32214305	0.87093055	0.67124856	0.97877765	1	6515	tags=30%, list=31%, signal=44%
WP_APOPTOSIS_MODULATION_AND_SIGNALING	85	0.2976208	0.86923957	0.7175975	0.98104537	1	4172	tags=19%, list=20%, signal=23%
REACTOME_TNFR1_INDUCED_NFKAPPAB_SIGNALING_PATHWAY	30	0.33865026	0.86877936	0.6642247	0.98090243	1	1507	tags=10%, list=7%, signal=11%
REACTOME_NUCLEOTIDE_SALVAGE	20	0.36675993	0.86831105	0.6466837	0.98081523	1	1038	tags=10%, list=5%, signal=11%
REACTOME_PARASITE_INFECTION	56	0.30748194	0.86749095	0.69652855	0.9813872	1	5478	tags=27%, list=26%, signal=36%
WP_NONALCOHOLIC_FATTY_LIVER_DISEASE	143	0.28750136	0.8671018	0.756371	0.9811862	1	2600	tags=12%, list=12%, signal=13%
PID_LPA4_PATHWAY	15	0.38526493	0.86678207	0.64784944	0.980789	1	396	tags=7%, list=2%, signal=7%
REACTOME_SIGNALING_BY_BRAF_AND_RAF1_FUSIONS	65	0.3020233	0.86639905	0.69966996	0.98049515	1	4257	tags=18%, list=20%, signal=23%
REACTOME_SENESCENCE_ASSOCIATED_SECRETORY_PHENOTYPE_SASP	52	0.31381473	0.86610454	0.687638	0.9800015	1	5240	tags=31%, list=25%, signal=41%
WP_16P112_DISTAL_DELETION_SYNDROME	32	0.334993	0.8659302	0.63906056	0.9793238	1	4984	tags=34%, list=24%, signal=45%
REACTOME_NOTCH3_ACTIVATION_AND_TRANSMISSION_OF_SIGNAL_TO_THE_NUCLEUS	25	0.3524824	0.8653151	0.6692209	0.979512	1	3135	tags=20%, list=15%, signal=23%
KEGG_P53_SIGNALING_PATHWAY	67	0.3015102	0.8652339	0.71905273	0.9786371	1	2661	tags=13%, list=13%, signal=15%
REACTOME_ESTROGEN_DEPENDENT_NUCLEAR_EVENTS_DOWNSTREAM_OF_ESR_MEMBRANE_SIGNALING	24	0.35463467	0.8648072	0.6612296	0.978426	1	3201	tags=21%, list=15%, signal=25%
BIOCARTA_PGC1A_PATHWAY	15	0.38187405	0.8644188	0.65320337	0.97817034	1	5203	tags=27%, list=25%, signal=35%
WP_SEROTONIN_RECEPTOR_2_AND_ELKSRFGATA4_SIGNALING	20	0.361969	0.8633107	0.6478149	0.9793154	1	2529	tags=20%, list=12%, signal=23%
WP_NAD_METABOLISM_IN_ONCOGENEINDUCED_SENESCENCE_AND_MITOCHONDRIAL_DYSFUNCTIONASSOCIATED_SENESCENCE	24	0.34691313	0.86270607	0.660401	0.97948354	1	665	tags=8%, list=3%, signal=9%
WP_IL1_SIGNALING_PATHWAY	55	0.31003964	0.861336	0.7072626	0.98107386	1	4491	tags=18%, list=21%, signal=23%
WP_ACUTE_VIRAL_MYOCARDITIS	78	0.29603043	0.86119163	0.71565497	0.98033845	1	6680	tags=32%, list=32%, signal=47%
REACTOME_EGR2_AND_SOX10_MEDIATED_INITIATION_OF_SCHWANN_CELL_MYELINATION	29	0.34272462	0.86104685	0.6727273	0.9795551	1	7394	tags=48%, list=35%, signal=75%
REACTOME_VITAMIN_B5_PANTOTHENATE_METABOLISM	17	0.36502647	0.8594829	0.63672394	0.9815113	1	168	tags=6%, list=1%, signal=6%
WP_PHOTODYNAMIC_THERAPYINDUCED_AP1_SURVIVAL_SIGNALING	46	0.3138682	0.85863566	0.69920546	0.9821693	1	5326	tags=33%, list=25%, signal=44%
WP_EGFR_TYROSINE_KINASE_INHIBITOR_RESISTANCE	82	0.29547212	0.85818386	0.7292111	0.9820129	1	2912	tags=17%, list=14%, signal=20%
PID_THROMBIN_PAR1_PATHWAY	43	0.32054427	0.8580149	0.6911765	0.9813193	1	5440	tags=23%, list=26%, signal=31%
REACTOME_CONSTITUTIVE_SIGNALING_BY_AKT1_E17K_IN_CANCER	26	0.34346434	0.85729146	0.6865672	0.9817026	1	5240	tags=31%, list=25%, signal=41%
WP_AMINO_ACID_METABOLISM	79	0.297833	0.8567612	0.74221265	0.98168045	1	2549	tags=14%, list=12%, signal=16%
REACTOME_NEUREXINS_AND_NEUROLIGINS	56	0.3006969	0.85438395	0.7039548	0.9852014	1	6836	tags=41%, list=33%, signal=61%
WP_16P112_PROXIMAL_DELETION_SYNDROME	72	0.29541746	0.85395634	0.7299035	0.9849716	1	2572	tags=14%, list=12%, signal=16%
BIOCARTA_P53HYPOXIA_PATHWAY	20	0.35301986	0.8516117	0.6627141	0.98845255	1	1252	tags=10%, list=6%, signal=11%
WP_INTERACTIONS_BETWEEN_LOXL4_AND_OXIDATIVE_STRESS_PATHWAY	18	0.3637091	0.8510096	0.67320263	0.9885734	1	2264	tags=22%, list=11%, signal=25%
PID_HES_HEY_PATHWAY	45	0.31372583	0.8507468	0.69510806	0.988039	1	4031	tags=20%, list=19%, signal=25%
REACTOME_NOTCH1_INTRACELLULAR_DOMAIN_REGULATES_TRANSCRIPTION	46	0.30945483	0.84979516	0.70193404	0.988832	1	5611	tags=30%, list=27%, signal=41%
PID_ERBB1_DOWNSTREAM_PATHWAY	105	0.28979093	0.8497817	0.7526316	0.98783183	1	7737	tags=33%, list=37%, signal=53%
KEGG_ERBB_SIGNALING_PATHWAY	86	0.28971475	0.84658283	0.7356077	0.99293125	1	5240	tags=24%, list=25%, signal=32%
WP_CHROMOSOMAL_AND_MICROSATELLITE_INSTABILITY_IN_COLORECTAL_CANCER	71	0.293355	0.8453176	0.72955287	0.9942618	1	2559	tags=13%, list=12%, signal=14%
BIOCARTA_41BB_PATHWAY	15	0.3716181	0.8442591	0.6849132	0.9951763	1	5386	tags=40%, list=26%, signal=54%
REACTOME_ONCOGENIC_MAPK_SIGNALING	82	0.29382908	0.84411454	0.7346939	0.9944296	1	4257	tags=18%, list=20%, signal=23%
WP_IL5_SIGNALING_PATHWAY	38	0.32081676	0.84338754	0.7041763	0.9947578	1	2691	tags=13%, list=13%, signal=15%
BIOCARTA_ECM_PATHWAY	19	0.36076245	0.8425372	0.6684073	0.9951836	1	8168	tags=47%, list=39%, signal=78%
WP_CARDIAC_HYPERTROPHIC_RESPONSE	54	0.30474904	0.8420651	0.71792036	0.9950624	1	2692	tags=13%, list=13%, signal=15%
REACTOME_INFLAMMASOMES	21	0.34950143	0.84029144	0.6825596	0.9972457	1	5878	tags=48%, list=28%, signal=66%
REACTOME_PHASE_I_FUNCTIONALIZATION_OF_COMPOUNDS	90	0.2881974	0.8392922	0.77566135	0.9980174	1	3389	tags=18%, list=16%, signal=21%
WP_15Q133_COPY_NUMBER_VARIATION_SYNDROME	18	0.36412725	0.83917487	0.68575233	0.997204	1	5505	tags=39%, list=26%, signal=53%
WP_MECHANOREGULATION_AND_PATHOLOGY_OF_YAPTAZ_VIA_HIPPO_AND_NONHIPPO_MECHANISMS	46	0.30851018	0.8381465	0.70758927	0.99810565	1	5960	tags=26%, list=28%, signal=36%
PID_P38_ALPHA_BETA_PATHWAY	29	0.3281833	0.8373719	0.7002342	0.99848354	1	2609	tags=10%, list=12%, signal=12%
PID_HEDGEHOG_GLI_PATHWAY	47	0.3093293	0.83562464	0.72571427	1	1	3950	tags=15%, list=19%, signal=18%
REACTOME_NEGATIVE_REGULATION_OF_FGFR3_SIGNALING	27	0.3360628	0.8352328	0.7106538	1	1	6349	tags=30%, list=30%, signal=42%
REACTOME_RA_BIOSYNTHESIS_PATHWAY	20	0.35247266	0.8342318	0.69974554	1	1	2344	tags=25%, list=11%, signal=28%
PID_RAC1_REG_PATHWAY	38	0.32008493	0.83379835	0.7146172	1	1	6343	tags=34%, list=30%, signal=49%
BIOCARTA_TNFR2_PATHWAY	17	0.35765988	0.8318668	0.6919192	1	1	1271	tags=12%, list=6%, signal=13%
REACTOME_GASTRIN_CREB_SIGNALLING_PATHWAY_VIA_PKC_AND_MAPK	17	0.3581764	0.83136106	0.6931079	1	1	4528	tags=24%, list=22%, signal=30%
WP_SEROTONIN_AND_ANXIETY	15	0.37249514	0.8310004	0.69547874	1	1	4116	tags=47%, list=20%, signal=58%
REACTOME_GABA_RECEPTOR_ACTIVATION	57	0.2974067	0.83004284	0.74529344	1	1	606	tags=5%, list=3%, signal=5%
PID_REELIN_PATHWAY	28	0.3287196	0.8299262	0.6993789	1	1	8262	tags=50%, list=39%, signal=83%
WP_NANOPARTICLE_TRIGGERED_AUTOPHAGIC_CELL_DEATH	21	0.3441875	0.82649976	0.6998739	1	1	4000	tags=24%, list=19%, signal=29%
WP_FRAGILE_X_SYNDROME	120	0.27636716	0.8255438	0.79292405	1	1	4810	tags=22%, list=23%, signal=28%
REACTOME_REGULATION_OF_CHOLESTEROL_BIOSYNTHESIS_BY_SREBP_SREBF	53	0.29903978	0.82548106	0.74304783	1	1	436	tags=4%, list=2%, signal=4%
PID_ECADHERIN_KERATINOCYTE_PATHWAY	21	0.34522423	0.8253404	0.7034739	1	1	9909	tags=52%, list=47%, signal=99%
KEGG_THYROID_CANCER	29	0.32431418	0.8243444	0.7121588	1	1	3864	tags=21%, list=18%, signal=25%
REACTOME_CA_DEPENDENT_EVENTS	36	0.31215116	0.82364213	0.73887587	1	1	1413	tags=8%, list=7%, signal=9%
REACTOME_TNF_SIGNALING	44	0.30878893	0.8232482	0.7517241	1	1	1507	tags=9%, list=7%, signal=10%
PID_MTOR_4PATHWAY	68	0.29198387	0.82259285	0.7668845	1	1	737	tags=4%, list=4%, signal=5%
REACTOME_INTERFERON_ALPHA_BETA_SIGNALING	57	0.2906986	0.8223153	0.7627856	1	1	5278	tags=28%, list=25%, signal=37%
REACTOME_NOTCH2_ACTIVATION_AND_TRANSMISSION_OF_SIGNAL_TO_THE_NUCLEUS	22	0.3422306	0.82166773	0.72034955	1	1	8382	tags=55%, list=40%, signal=91%
REACTOME_PKA_MEDIATED_PHOSPHORYLATION_OF_CREB	19	0.3447082	0.8199297	0.70811516	1	1	396	tags=5%, list=2%, signal=5%
WP_SPHINGOLIPID_METABOLISM_INTEGRATED_PATHWAY	25	0.3302595	0.8196549	0.7121402	1	1	4198	tags=16%, list=20%, signal=20%
REACTOME_SIGNALING_BY_NTRK3_TRKC	16	0.359708	0.8183444	0.7087766	1	1	7638	tags=38%, list=37%, signal=59%
REACTOME_SIGNALING_BY_WNT	258	0.264063	0.8174659	0.88276553	1	1	3108	tags=11%, list=15%, signal=13%
WP_ALZHEIMERS_DISEASE	252	0.26515603	0.8171394	0.88977957	1	1	3646	tags=16%, list=17%, signal=19%
WP_OLIGODENDROCYTE_SPECIFICATION_AND_DIFFERENTIATION_LEADING_TO_MYELIN_COMPONENTS_FOR_CNS	28	0.323392	0.8165798	0.71788716	1	1	5724	tags=43%, list=27%, signal=59%
PID_VEGFR1_2_PATHWAY	69	0.28352794	0.81610566	0.77321815	1	1	7762	tags=36%, list=37%, signal=57%
REACTOME_REGULATION_OF_PTEN_GENE_TRANSCRIPTION	60	0.2870177	0.8141421	0.7593985	1	1	3113	tags=15%, list=15%, signal=18%
WP_ALZHEIMERS_DISEASE_AND_MIRNA_EFFECTS	256	0.26215053	0.8131909	0.8848849	1	1	3646	tags=16%, list=17%, signal=19%
WP_PRION_DISEASE_PATHWAY	34	0.31434292	0.8121913	0.7245017	1	1	5512	tags=32%, list=26%, signal=44%
REACTOME_PKA_ACTIVATION_IN_GLUCAGON_SIGNALLING	16	0.34947827	0.81174725	0.71193415	1	1	396	tags=6%, list=2%, signal=6%
REACTOME_REPRODUCTION	72	0.28175196	0.8115512	0.7887931	1	1	1428	tags=10%, list=7%, signal=10%
BIOCARTA_SHH_PATHWAY	15	0.35939032	0.8113967	0.7078189	1	1	3664	tags=20%, list=18%, signal=24%
REACTOME_NUCLEAR_EVENTS_STIMULATED_BY_ALK_SIGNALING_IN_CANCER	18	0.34703174	0.81111777	0.71276593	1	1	5003	tags=28%, list=24%, signal=36%
WP_SMALL_CELL_LUNG_CANCER	94	0.27731878	0.8110277	0.8131524	1	1	5240	tags=29%, list=25%, signal=38%
WP_MAMMARY_GLAND_DEVELOPMENT_PATHWAY_PREGNANCY_AND_LACTATION_STAGE_3_OF_4	29	0.31989482	0.8102544	0.7493976	1	1	4095	tags=28%, list=20%, signal=34%
REACTOME_SIGNALING_BY_FGFR1	46	0.2963359	0.8100972	0.75084937	1	1	7762	tags=37%, list=37%, signal=59%
REACTOME_ACTIVATION_OF_AMPK_DOWNSTREAM_OF_NMDARS	27	0.32235384	0.80857885	0.7326733	1	1	3987	tags=33%, list=19%, signal=41%
REACTOME_TRANSCRIPTIONAL_REGULATION_BY_MECP2	57	0.29255003	0.80752426	0.76258206	1	1	2940	tags=14%, list=14%, signal=16%
PID_BETA_CATENIN_DEG_PATHWAY	17	0.3506764	0.80460554	0.71821755	1	1	980	tags=6%, list=5%, signal=6%
KEGG_PRION_DISEASES	28	0.3127183	0.80371207	0.7376058	1	1	6544	tags=36%, list=31%, signal=52%
BIOCARTA_STRESS_PATHWAY	24	0.32450593	0.8030311	0.73507464	1	1	4319	tags=21%, list=21%, signal=26%
REACTOME_PRE_NOTCH_EXPRESSION_AND_PROCESSING	49	0.2925491	0.8014924	0.7795454	1	1	5485	tags=29%, list=26%, signal=39%
REACTOME_REGULATION_OF_LIPID_METABOLISM_BY_PPARALPHA	110	0.27113324	0.801354	0.84145075	1	1	2565	tags=7%, list=12%, signal=8%
REACTOME_ACTIVATION_OF_GENE_EXPRESSION_BY_SREBF_SREBP	40	0.29678515	0.80080324	0.78514284	1	1	58	tags=3%, list=0%, signal=3%
WP_OXIDATIVE_STRESS_RESPONSE	32	0.3108059	0.80070317	0.7526754	1	1	1960	tags=16%, list=9%, signal=17%
PID_NFAT_3PATHWAY	53	0.28802475	0.80028313	0.7866521	1	1	5342	tags=26%, list=26%, signal=35%
PID_IL2_PI3K_PATHWAY	32	0.31055275	0.7999819	0.7537923	1	1	2691	tags=16%, list=13%, signal=18%
REACTOME_REGULATED_NECROSIS	52	0.29062706	0.7993954	0.7687151	1	1	1507	tags=6%, list=7%, signal=6%
KEGG_ACUTE_MYELOID_LEUKEMIA	55	0.2828748	0.7993548	0.7744108	1	1	4979	tags=27%, list=24%, signal=36%
WP_TOLLLIKE_RECEPTOR_SIGNALING_RELATED_TO_MYD88	30	0.30981538	0.7990771	0.74278843	1	1	4376	tags=20%, list=21%, signal=25%
REACTOME_PI3K_EVENTS_IN_ERBB2_SIGNALING	16	0.3519833	0.798368	0.73614776	1	1	3069	tags=25%, list=15%, signal=29%
WP_RAC1PAK1P38MMP2_PATHWAY	66	0.27733633	0.7971872	0.78232044	1	1	4319	tags=20%, list=21%, signal=25%
BIOCARTA_RELA_PATHWAY	15	0.34792644	0.7967759	0.7211796	1	1	4319	tags=27%, list=21%, signal=34%
REACTOME_CTLA4_INHIBITORY_SIGNALING	19	0.33902368	0.7962874	0.7224384	1	1	1245	tags=11%, list=6%, signal=11%
PID_RETINOIC_ACID_PATHWAY	30	0.30728	0.79593974	0.75783134	1	1	5197	tags=23%, list=25%, signal=31%
WP_NEPHROTIC_SYNDROME	42	0.29326338	0.79308057	0.774942	1	1	3114	tags=19%, list=15%, signal=22%
REACTOME_INSULIN_PROCESSING	26	0.3136353	0.7927226	0.7487745	1	1	1457	tags=8%, list=7%, signal=8%
REACTOME_WNT5A_DEPENDENT_INTERNALIZATION_OF_FZD4	15	0.35102442	0.7912879	0.75510204	1	1	4528	tags=20%, list=22%, signal=26%
KEGG_NOD_LIKE_RECEPTOR_SIGNALING_PATHWAY	56	0.2805868	0.7909968	0.80333334	1	1	5878	tags=30%, list=28%, signal=42%
REACTOME_CD28_CO_STIMULATION	31	0.30841842	0.7900744	0.7652582	1	1	1791	tags=10%, list=9%, signal=11%
BIOCARTA_NFAT_PATHWAY	48	0.29142502	0.7884267	0.7897143	1	1	4240	tags=17%, list=20%, signal=21%
WP_CONGENITAL_GENERALIZED_LIPODYSTROPHY_CGL	17	0.34361744	0.7882716	0.7398693	1	1	5478	tags=35%, list=26%, signal=48%
WP_EXTRACELLULAR_VESICLES_IN_THE_CROSSTALK_OF_CARDIAC_CELLS	20	0.3322598	0.7876471	0.76	1	1	2600	tags=20%, list=12%, signal=23%
WP_INITIATION_OF_TRANSCRIPTION_AND_TRANSLATION_ELONGATION_AT_THE_HIV1_LTR	30	0.31266364	0.7876254	0.7614571	1	1	5197	tags=20%, list=25%, signal=27%
WP_PROLACTIN_SIGNALING_PATHWAY	76	0.2739948	0.7864945	0.80128896	1	1	7820	tags=36%, list=37%, signal=57%
PID_ERBB_NETWORK_PATHWAY	15	0.3492633	0.7861407	0.7411765	1	1	3069	tags=27%, list=15%, signal=31%
REACTOME_ENERGY_DEPENDENT_REGULATION_OF_MTOR_BY_LKB1_AMPK	28	0.31152672	0.7861262	0.7721675	1	1	3987	tags=14%, list=19%, signal=18%
REACTOME_ACYL_CHAIN_REMODELLING_OF_PE	20	0.33158678	0.7858541	0.7368421	1	1	5396	tags=35%, list=26%, signal=47%
REACTOME_EXTRA_NUCLEAR_ESTROGEN_SIGNALING	74	0.2731589	0.7854756	0.8083961	1	1	4002	tags=16%, list=19%, signal=20%
REACTOME_TGF_BETA_RECEPTOR_SIGNALING_ACTIVATES_SMADS	32	0.3019014	0.78488785	0.7750294	1	1	5184	tags=25%, list=25%, signal=33%
BIOCARTA_PTDINS_PATHWAY	23	0.32505095	0.7837398	0.76741296	1	1	1662	tags=9%, list=8%, signal=9%
WP_REGUCALCIN_IN_PROXIMAL_TUBULE_EPITHELIAL_KIDNEY_CELLS	27	0.31111503	0.78361195	0.74727935	1	1	5924	tags=30%, list=28%, signal=41%
REACTOME_RAB_GEFS_EXCHANGE_GTP_FOR_GDP_ON_RABS	87	0.2659277	0.7832824	0.8278075	1	1	6071	tags=26%, list=29%, signal=37%
WP_STEROL_REGULATORY_ELEMENTBINDING_PROTEINS_SREBP_SIGNALING	65	0.2789229	0.78316385	0.805708	1	1	4052	tags=15%, list=19%, signal=19%
WP_TLR4_SIGNALING_AND_TOLERANCE	27	0.3141916	0.7816107	0.7821429	1	1	4172	tags=22%, list=20%, signal=28%
KEGG_AMYOTROPHIC_LATERAL_SCLEROSIS_ALS	51	0.28243956	0.7810763	0.77643174	1	1	3121	tags=16%, list=15%, signal=18%
REACTOME_CALNEXIN_CALRETICULIN_CYCLE	25	0.31579575	0.78080124	0.756426	1	1	8327	tags=48%, list=40%, signal=80%
WP_PARKINSONS_DISEASE_PATHWAY	38	0.2937606	0.7793629	0.78329295	1	1	217	tags=5%, list=1%, signal=5%
WP_HEAD_AND_NECK_SQUAMOUS_CELL_CARCINOMA	73	0.2689812	0.7792092	0.83208555	1	1	5635	tags=22%, list=27%, signal=30%
WP_WNT_SIGNALING_PATHWAY	52	0.28415293	0.7782926	0.80536914	1	1	4528	tags=17%, list=22%, signal=22%
REACTOME_INTRINSIC_PATHWAY_OF_FIBRIN_CLOT_FORMATION	20	0.32324857	0.7779773	0.7609819	1	1	4257	tags=40%, list=20%, signal=50%
REACTOME_MAP2K_AND_MAPK_ACTIVATION	40	0.29421967	0.7764746	0.7957497	1	1	4881	tags=23%, list=23%, signal=29%
REACTOME_RHO_GTPASES_ACTIVATE_ROCKS	19	0.32198727	0.77571267	0.7620865	1	1	7854	tags=42%, list=38%, signal=67%
BIOCARTA_ARAP_PATHWAY	17	0.33312044	0.77485406	0.7771953	1	1	6733	tags=35%, list=32%, signal=52%
REACTOME_TRANSCRIPTIONAL_REGULATION_BY_THE_AP_2_TFAP2_FAMILY_OF_TRANSCRIPTION_FACTORS	37	0.29013854	0.77397156	0.786385	1	1	1949	tags=14%, list=9%, signal=15%
REACTOME_NEGATIVE_REGULATION_OF_MAPK_PATHWAY	43	0.2887935	0.77379644	0.81299883	1	1	2872	tags=14%, list=14%, signal=16%
REACTOME_RHO_GTPASES_ACTIVATE_CIT	19	0.32139406	0.7700194	0.78926176	1	1	7854	tags=53%, list=38%, signal=84%
PID_HEDGEHOG_2PATHWAY	22	0.318373	0.76917297	0.7962963	1	1	4342	tags=27%, list=21%, signal=34%
PID_RB_1PATHWAY	64	0.27093655	0.7685111	0.83243245	1	1	2508	tags=13%, list=12%, signal=14%
REACTOME_TRANSPORT_TO_THE_GOLGI_AND_SUBSEQUENT_MODIFICATION	179	0.2528418	0.7684337	0.90678823	1	1	5106	tags=17%, list=24%, signal=23%
KEGG_ENDOMETRIAL_CANCER	51	0.27785674	0.76773614	0.80429864	1	1	2691	tags=12%, list=13%, signal=13%
PID_ER_NONGENOMIC_PATHWAY	40	0.29030585	0.76721936	0.8057143	1	1	4002	tags=15%, list=19%, signal=19%
REACTOME_MYD88_INDEPENDENT_TLR4_CASCADE	96	0.26027182	0.766647	0.8510417	1	1	2788	tags=11%, list=13%, signal=13%
REACTOME_ENDOGENOUS_STEROLS	24	0.3148736	0.76641524	0.79288435	1	1	4508	tags=21%, list=22%, signal=27%
BIOCARTA_RHO_PATHWAY	21	0.31524226	0.76615334	0.77365726	1	1	5947	tags=29%, list=28%, signal=40%
WP_APOPTOSISRELATED_NETWORK_DUE_TO_ALTERED_NOTCH3_IN_OVARIAN_CANCER	52	0.2760897	0.7655665	0.8314351	1	1	5240	tags=27%, list=25%, signal=36%
WP_THYMIC_STROMAL_LYMPHOPOIETIN_TSLP_SIGNALING_PATHWAY	44	0.2857794	0.76553315	0.799775	1	1	4762	tags=23%, list=23%, signal=29%
WP_MECP2_AND_ASSOCIATED_RETT_SYNDROME	69	0.2666979	0.76504767	0.8469945	1	1	3436	tags=20%, list=16%, signal=24%
BIOCARTA_RAC1_PATHWAY	21	0.32063675	0.7650274	0.76636714	1	1	6204	tags=38%, list=30%, signal=54%
KEGG_TRYPTOPHAN_METABOLISM	35	0.28997907	0.7615507	0.81287247	1	1	392	tags=6%, list=2%, signal=6%
BIOCARTA_PAR1_PATHWAY	19	0.32333297	0.7614797	0.78255373	1	1	8348	tags=47%, list=40%, signal=79%
REACTOME_COOPERATION_OF_PDCL_PHLP1_AND_TRIC_CCT_IN_G_PROTEIN_BETA_FOLDING	38	0.2873921	0.7605125	0.81946075	1	1	3945	tags=16%, list=19%, signal=19%
REACTOME_TRANSCRIPTIONAL_REGULATION_OF_PLURIPOTENT_STEM_CELLS	30	0.29757547	0.7599796	0.8076923	1	1	3934	tags=23%, list=19%, signal=29%
PID_FCER1_PATHWAY	57	0.27050892	0.75965655	0.82560706	1	1	5478	tags=25%, list=26%, signal=33%
WP_APOPTOSIS	81	0.2650406	0.7594527	0.8476395	1	1	4319	tags=20%, list=21%, signal=25%
REACTOME_ACTIVATION_OF_SMO	18	0.32602158	0.75894487	0.7804552	1	1	4391	tags=22%, list=21%, signal=28%
REACTOME_NUCLEOTIDE_BINDING_DOMAIN_LEUCINE_RICH_REPEAT_CONTAINING_RECEPTOR_NLR_SIGNALING_PATHWAYS	56	0.27192217	0.75797457	0.8279689	1	1	5878	tags=29%, list=28%, signal=40%
WP_GLIOBLASTOMA_SIGNALING_PATHWAYS	82	0.25867477	0.75742406	0.85470086	1	1	7762	tags=39%, list=37%, signal=62%
REACTOME_GLYCOGEN_BREAKDOWN_GLYCOGENOLYSIS	15	0.33566958	0.7572624	0.78016084	1	1	4553	tags=27%, list=22%, signal=34%
REACTOME_NEGATIVE_REGULATION_OF_FGFR2_SIGNALING	30	0.2964915	0.7545474	0.8012048	1	1	6349	tags=27%, list=30%, signal=38%
WP_HAIR_FOLLICLE_DEVELOPMENT_ORGANOGENESIS_PART_2_OF_3	31	0.29290605	0.7544174	0.8067633	1	1	4339	tags=19%, list=21%, signal=24%
KEGG_GLYCOSAMINOGLYCAN_BIOSYNTHESIS_CHONDROITIN_SULFATE	21	0.3152169	0.7526077	0.79741937	1	1	3348	tags=19%, list=16%, signal=23%
KEGG_PARKINSONS_DISEASE	106	0.2533503	0.7523581	0.87759334	1	1	217	tags=3%, list=1%, signal=3%
REACTOME_TRANSPORT_OF_CONNEXONS_TO_THE_PLASMA_MEMBRANE	20	0.31224778	0.7501567	0.80126584	1	1	3825	tags=35%, list=18%, signal=43%
WP_SPLICING_FACTOR_NOVA_REGULATED_SYNAPTIC_PROTEINS	41	0.27697986	0.74965346	0.83580387	1	1	8768	tags=56%, list=42%, signal=96%
REACTOME_OVARIAN_TUMOR_DOMAIN_PROTEASES	38	0.281763	0.74941224	0.80861247	1	1	2208	tags=11%, list=11%, signal=12%
REACTOME_METABOLISM_OF_WATER_SOLUBLE_VITAMINS_AND_COFACTORS	114	0.25081182	0.7492641	0.8903689	1	1	1946	tags=8%, list=9%, signal=9%
WP_PHOSPHOINOSITIDES_METABOLISM	48	0.27216852	0.74858046	0.8322222	1	1	5437	tags=21%, list=26%, signal=28%
WP_EXERCISEINDUCED_CIRCADIAN_REGULATION	45	0.27592376	0.7480217	0.85617214	1	1	1809	tags=9%, list=9%, signal=10%
KEGG_GLYCOSAMINOGLYCAN_DEGRADATION	20	0.31551188	0.747581	0.81424934	1	1	5964	tags=40%, list=29%, signal=56%
KEGG_GLYCOSPHINGOLIPID_BIOSYNTHESIS_GANGLIO_SERIES	15	0.3351411	0.74659324	0.77732795	1	1	5728	tags=33%, list=27%, signal=46%
REACTOME_NEF_MEDIATES_DOWN_MODULATION_OF_CELL_SURFACE_RECEPTORS_BY_RECRUITING_THEM_TO_CLATHRIN_ADAPTERS	20	0.3133596	0.7438975	0.82106596	1	1	3124	tags=15%, list=15%, signal=18%
BIOCARTA_HER2_PATHWAY	23	0.3039928	0.74367625	0.82276845	1	1	2600	tags=13%, list=12%, signal=15%
REACTOME_ER_QUALITY_CONTROL_COMPARTMENT_ERQC	20	0.3098144	0.7435913	0.81136954	1	1	6497	tags=35%, list=31%, signal=51%
REACTOME_CELL_DEATH_SIGNALLING_VIA_NRAGE_NRIF_AND_NADE	75	0.25641638	0.74283373	0.86947143	1	1	8159	tags=41%, list=39%, signal=68%
REACTOME_SPHINGOLIPID_METABOLISM	84	0.2573967	0.74283355	0.87066245	1	1	5377	tags=21%, list=26%, signal=29%
REACTOME_SIALIC_ACID_METABOLISM	32	0.28961626	0.74187815	0.82222223	1	1	7885	tags=47%, list=38%, signal=75%
REACTOME_PHASE_0_RAPID_DEPOLARISATION	32	0.29081476	0.74152076	0.83729213	1	1	4898	tags=28%, list=23%, signal=37%
WP_METAPATHWAY_BIOTRANSFORMATION_PHASE_I_AND_II	153	0.24320792	0.7401091	0.9193054	1	1	2585	tags=11%, list=12%, signal=13%
PID_IGF1_PATHWAY	29	0.2930392	0.73970383	0.81995136	1	1	8118	tags=41%, list=39%, signal=68%
WP_SEROTONIN_HTR1_GROUP_AND_FOS_PATHWAY	32	0.28985053	0.7395044	0.8359096	1	1	2529	tags=13%, list=12%, signal=14%
WP_RETT_SYNDROME_CAUSING_GENES	46	0.2727027	0.7394177	0.8491228	1	1	4090	tags=20%, list=20%, signal=24%
WP_INFLUENCE_OF_LAMINOPATHIES_ON_WNT_SIGNALING	34	0.28760073	0.7384406	0.8392435	1	1	2508	tags=15%, list=12%, signal=17%
REACTOME_NOD1_2_SIGNALING_PATHWAY	36	0.28305942	0.73819804	0.8504566	1	1	1507	tags=8%, list=7%, signal=9%
WP_SREBF_AND_MIR33_IN_CHOLESTEROL_AND_LIPID_HOMEOSTASIS	16	0.3178643	0.73781306	0.79683375	1	1	4691	tags=25%, list=22%, signal=32%
WP_MAJOR_RECEPTORS_TARGETED_BY_EPINEPHRINE_AND_NOREPINEPHRINE	15	0.32308045	0.7373675	0.8150685	1	1	4985	tags=27%, list=24%, signal=35%
PID_NECTIN_PATHWAY	30	0.28653345	0.7359762	0.8389022	1	1	3748	tags=13%, list=18%, signal=16%
BIOCARTA_TH1TH2_PATHWAY	15	0.32402498	0.7352172	0.8137931	1	1	2002	tags=13%, list=10%, signal=15%
WP_TNFALPHA_SIGNALING_PATHWAY	91	0.25236765	0.73450166	0.8914647	1	1	2661	tags=12%, list=13%, signal=14%
WP_UNFOLDED_PROTEIN_RESPONSE	24	0.29991272	0.734483	0.824781	1	1	2436	tags=17%, list=12%, signal=19%
PID_TOLL_ENDOGENOUS_PATHWAY	23	0.29910555	0.73423886	0.81784385	1	1	3367	tags=17%, list=16%, signal=21%
WP_KALLMANN_SYNDROME	21	0.3019918	0.7326616	0.8244275	1	1	6419	tags=29%, list=31%, signal=41%
WP_AMYOTROPHIC_LATERAL_SCLEROSIS_ALS	37	0.27647683	0.73250216	0.84407973	1	1	2661	tags=11%, list=13%, signal=12%
BIOCARTA_CTCF_PATHWAY	24	0.29800177	0.7321094	0.817952	1	1	4423	tags=21%, list=21%, signal=26%
WP_MAMMALIAN_DISORDER_OF_SEXUAL_DEVELOPMENT	23	0.3018885	0.7319598	0.8237454	1	1	4192	tags=26%, list=20%, signal=33%
REACTOME_SUMOYLATION_OF_TRANSCRIPTION_FACTORS	20	0.30654526	0.7316076	0.81878304	1	1	3597	tags=15%, list=17%, signal=18%
WP_ERBB_SIGNALING_PATHWAY	90	0.24930264	0.72921115	0.8968421	1	1	5240	tags=22%, list=25%, signal=30%
REACTOME_SYNTHESIS_SECRETION_AND_INACTIVATION_OF_GLUCAGON_LIKE_PEPTIDE_1_GLP_1	16	0.31394702	0.72828084	0.80665815	1	1	999	tags=6%, list=5%, signal=7%
WP_GABA_RECEPTOR_SIGNALING	30	0.28766546	0.7280823	0.83790225	1	1	1178	tags=10%, list=6%, signal=11%
BIOCARTA_EDG1_PATHWAY	22	0.30077887	0.7247979	0.836478	1	1	5571	tags=27%, list=27%, signal=37%
BIOCARTA_TOLL_PATHWAY	25	0.28879517	0.7241587	0.8337563	1	1	4319	tags=20%, list=21%, signal=25%
WP_INTERLEUKIN11_SIGNALING_PATHWAY	44	0.26684305	0.7238004	0.8643275	1	1	2382	tags=11%, list=11%, signal=13%
REACTOME_INTERLEUKIN_1_FAMILY_SIGNALING	128	0.24284905	0.72355026	0.9346272	1	1	1901	tags=8%, list=9%, signal=9%
REACTOME_INTERACTION_BETWEEN_L1_AND_ANKYRINS	31	0.28258586	0.7227455	0.8429752	1	1	2887	tags=23%, list=14%, signal=26%
REACTOME_GAMMA_CARBOXYLATION_HYPUSINE_FORMATION_AND_ARYLSULFATASE_ACTIVATION	39	0.27233428	0.72262406	0.8496503	1	1	5426	tags=31%, list=26%, signal=41%
REACTOME_TRANSCRIPTIONAL_ACTIVITY_OF_SMAD2_SMAD3_SMAD4_HETEROTRIMER	45	0.26768044	0.7214737	0.8547106	1	1	1303	tags=7%, list=6%, signal=7%
WP_FOLATE_METABOLISM	59	0.2592307	0.7210784	0.8905192	1	1	4319	tags=24%, list=21%, signal=30%
REACTOME_CHAPERONE_MEDIATED_AUTOPHAGY	20	0.29943374	0.7203378	0.82745594	1	1	2168	tags=15%, list=10%, signal=17%
REACTOME_L1CAM_INTERACTIONS	119	0.24130508	0.72020555	0.93153524	1	1	4953	tags=26%, list=24%, signal=34%
REACTOME_TGF_BETA_RECEPTOR_SIGNALING_IN_EMT_EPITHELIAL_TO_MESENCHYMAL_TRANSITION	16	0.31592745	0.7186191	0.8299595	1	1	9684	tags=69%, list=46%, signal=128%
REACTOME_TRANSCRIPTIONAL_REGULATION_OF_GRANULOPOIESIS	28	0.27725595	0.71794957	0.8375451	1	1	2801	tags=18%, list=13%, signal=21%
REACTOME_ROLE_OF_LAT2_NTAL_LAB_ON_CALCIUM_MOBILIZATION	15	0.31456837	0.7173352	0.83942556	1	1	8362	tags=47%, list=40%, signal=78%
REACTOME_NETRIN_1_SIGNALING	49	0.26008743	0.7164833	0.8656215	1	1	6243	tags=33%, list=30%, signal=46%
WP_ESTROGEN_SIGNALING_PATHWAY	22	0.29335213	0.714689	0.8404669	1	1	2382	tags=14%, list=11%, signal=15%
SIG_IL4RECEPTOR_IN_B_LYPHOCYTES	26	0.2836581	0.7134801	0.85353535	1	1	8617	tags=46%, list=41%, signal=78%
REACTOME_FCERI_MEDIATED_CA_2_MOBILIZATION	30	0.28040683	0.71181685	0.8504222	1	1	4922	tags=23%, list=24%, signal=30%
KEGG_SMALL_CELL_LUNG_CANCER	84	0.23886356	0.7096494	0.9111349	1	1	4319	tags=24%, list=21%, signal=30%
REACTOME_ACTIVATION_OF_ANTERIOR_HOX_GENES_IN_HINDBRAIN_DEVELOPMENT_DURING_EARLY_EMBRYOGENESIS	60	0.24794836	0.701539	0.9153846	1	1	5438	tags=23%, list=26%, signal=31%
REACTOME_SMOOTH_MUSCLE_CONTRACTION	38	0.26598677	0.69779557	0.86150235	1	1	8168	tags=50%, list=39%, signal=82%
WP_FAS_LIGAND_PATHWAY_AND_STRESS_INDUCTION_OF_HEAT_SHOCK_PROTEINS	41	0.26279354	0.697193	0.8915525	1	1	1151	tags=7%, list=6%, signal=8%
REACTOME_SIGNALING_BY_MODERATE_KINASE_ACTIVITY_BRAF_MUTANTS	45	0.25325456	0.69360334	0.87986654	1	1	4881	tags=20%, list=23%, signal=26%
WP_MBDNF_AND_PROBDNF_REGULATION_OF_GABA_NEUROTRANSMISSION	38	0.25863472	0.6930803	0.8939394	1	1	2936	tags=13%, list=14%, signal=15%
REACTOME_VOLTAGE_GATED_POTASSIUM_CHANNELS	39	0.2642154	0.6921978	0.8828932	1	1	3413	tags=21%, list=16%, signal=24%
REACTOME_ER_TO_GOLGI_ANTEROGRADE_TRANSPORT	148	0.22824769	0.6890441	0.97757393	1	1	5106	tags=18%, list=24%, signal=23%
BIOCARTA_RAS_PATHWAY	22	0.28494763	0.6889951	0.86567163	1	1	4319	tags=18%, list=21%, signal=23%
REACTOME_CARGO_RECOGNITION_FOR_CLATHRIN_MEDIATED_ENDOCYTOSIS	102	0.23361382	0.6878857	0.9453781	1	1	3692	tags=14%, list=18%, signal=17%
REACTOME_APOPTOTIC_CLEAVAGE_OF_CELLULAR_PROTEINS	37	0.26312354	0.6864418	0.8847497	1	1	5635	tags=27%, list=27%, signal=37%
REACTOME_SIGNALING_BY_ERBB2	50	0.24600872	0.6852151	0.9119639	1	1	5846	tags=28%, list=28%, signal=39%
REACTOME_SIGNALING_BY_CTNNB1_PHOSPHO_SITE_MUTANTS	15	0.30804268	0.68489397	0.8484849	1	1	996	tags=7%, list=5%, signal=7%
REACTOME_HS_GAG_BIOSYNTHESIS	30	0.27381083	0.6847477	0.89605737	1	1	6275	tags=37%, list=30%, signal=52%
REACTOME_IRAK4_DEFICIENCY_TLR2_4	18	0.28917372	0.68438494	0.84962404	1	1	3440	tags=17%, list=16%, signal=20%
REACTOME_CELLULAR_RESPONSE_TO_STARVATION	149	0.22520414	0.68397933	0.9611452	1	1	10053	tags=62%, list=48%, signal=118%
REACTOME_SYNTHESIS_OF_BILE_ACIDS_AND_BILE_SALTS	31	0.26748818	0.6832984	0.8781973	1	1	4812	tags=19%, list=23%, signal=25%
KEGG_NON_SMALL_CELL_LUNG_CANCER	53	0.25000247	0.68316245	0.9111842	1	1	4528	tags=23%, list=22%, signal=29%
WP_ENDODERM_DIFFERENTIATION	139	0.22419359	0.6818524	0.947906	1	1	4044	tags=17%, list=19%, signal=21%
PID_RHOA_PATHWAY	44	0.25010657	0.6803335	0.89639115	1	1	6921	tags=27%, list=33%, signal=41%
KEGG_O_GLYCAN_BIOSYNTHESIS	29	0.2629691	0.6801788	0.8816276	1	1	7011	tags=34%, list=34%, signal=52%
REACTOME_INOSITOL_PHOSPHATE_METABOLISM	47	0.24811463	0.6787479	0.90734464	1	1	4355	tags=17%, list=21%, signal=21%
REACTOME_RUNX1_REGULATES_GENES_INVOLVED_IN_MEGAKARYOCYTE_DIFFERENTIATION_AND_PLATELET_FUNCTION	35	0.2588339	0.67566353	0.90758294	1	1	3682	tags=17%, list=18%, signal=21%
WP_MET_IN_TYPE_1_PAPILLARY_RENAL_CELL_CARCINOMA	58	0.23899457	0.67482835	0.92070484	1	1	7762	tags=36%, list=37%, signal=57%
SIG_REGULATION_OF_THE_ACTIN_CYTOSKELETON_BY_RHO_GTPASES	32	0.2597167	0.67062956	0.897343	1	1	7024	tags=25%, list=34%, signal=38%
KEGG_LINOLEIC_ACID_METABOLISM	22	0.27307487	0.6681552	0.8712871	1	1	3549	tags=27%, list=17%, signal=33%
REACTOME_INTRACELLULAR_SIGNALING_BY_SECOND_MESSENGERS	291	0.21487433	0.66749513	0.993	1	1	5699	tags=24%, list=27%, signal=32%
WP_LEPTIN_SIGNALING_PATHWAY	74	0.2281873	0.66682106	0.9478261	1	1	2406	tags=8%, list=12%, signal=9%
KEGG_PANCREATIC_CANCER	70	0.23363766	0.66586107	0.9420601	1	1	5047	tags=23%, list=24%, signal=30%
REACTOME_CARBOXYTERMINAL_POST_TRANSLATIONAL_MODIFICATIONS_OF_TUBULIN	41	0.24643818	0.6657591	0.900578	1	1	5117	tags=32%, list=24%, signal=42%
REACTOME_TP53_REGULATES_TRANSCRIPTION_OF_ADDITIONAL_CELL_CYCLE_GENES_WHOSE_EXACT_ROLE_IN_THE_P53_PATHWAY_REMAIN_UNCERTAIN	20	0.27861944	0.66480714	0.8923476	1	1	4904	tags=25%, list=23%, signal=33%
REACTOME_DEATH_RECEPTOR_SIGNALLING	139	0.21810159	0.6645127	0.9580777	1	1	6509	tags=26%, list=31%, signal=37%
SIG_PIP3_SIGNALING_IN_CARDIAC_MYOCTES	66	0.23046431	0.663294	0.9273128	1	1	5522	tags=21%, list=26%, signal=29%
REACTOME_INACTIVATION_OF_CSF3_G_CSF_SIGNALING	24	0.26946297	0.6629888	0.8965517	1	1	695	tags=4%, list=3%, signal=4%
REACTOME_UNFOLDED_PROTEIN_RESPONSE_UPR	91	0.22529653	0.6627595	0.9486373	1	1	5170	tags=24%, list=25%, signal=32%
WP_AMPACTIVATED_PROTEIN_KINASE_AMPK_SIGNALING	65	0.23199694	0.66245437	0.9270386	1	1	4315	tags=20%, list=21%, signal=25%
WP_RELATIONSHIP_BETWEEN_INFLAMMATION_COX2_AND_EGFR	25	0.27095792	0.66072786	0.9023199	1	1	2211	tags=12%, list=11%, signal=13%
REACTOME_MAP3K8_TPL2_DEPENDENT_MAPK1_3_ACTIVATION	16	0.2882935	0.6581481	0.88282293	1	1	2382	tags=13%, list=11%, signal=14%
WP_CAMKK2_PATHWAY	34	0.25159684	0.6579825	0.9037123	1	1	4319	tags=15%, list=21%, signal=19%
REACTOME_DISEASES_ASSOCIATED_WITH_GLYCOSYLATION_PRECURSOR_BIOSYNTHESIS	18	0.27869058	0.6577966	0.8947368	1	1	1888	tags=11%, list=9%, signal=12%
REACTOME_ERBB2_REGULATES_CELL_MOTILITY	15	0.29074574	0.65733206	0.8888889	1	1	3069	tags=20%, list=15%, signal=23%
REACTOME_ACYL_CHAIN_REMODELLING_OF_PS	17	0.28186733	0.65343654	0.8831169	1	1	5706	tags=35%, list=27%, signal=48%
KEGG_OTHER_GLYCAN_DEGRADATION	15	0.2895078	0.6532657	0.8890339	1	1	8505	tags=53%, list=41%, signal=90%
REACTOME_SRP_DEPENDENT_COTRANSLATIONAL_PROTEIN_TARGETING_TO_MEMBRANE	109	0.2163516	0.65138435	0.9627329	1	1	10053	tags=66%, list=48%, signal=127%
WP_MICROTUBULE_CYTOSKELETON_REGULATION	44	0.23857957	0.6504724	0.9230769	1	1	2675	tags=11%, list=13%, signal=13%
KEGG_GLYCINE_SERINE_AND_THREONINE_METABOLISM	28	0.2607868	0.6484206	0.9051724	1	1	4055	tags=29%, list=19%, signal=35%
WP_ENVELOPE_PROTEINS_AND_THEIR_POTENTIAL_ROLES_IN_EDMD_PHYSIOPATHOLOGY	43	0.24412318	0.6483759	0.9324943	1	1	7737	tags=37%, list=37%, signal=59%
WP_CANNABINOID_RECEPTOR_SIGNALING	27	0.25522873	0.64800876	0.91831684	1	1	323	tags=4%, list=2%, signal=4%
REACTOME_DISEASES_OF_SIGNAL_TRANSDUCTION_BY_GROWTH_FACTOR_RECEPTORS_AND_SECOND_MESSENGERS	415	0.20554648	0.64471436	1	1	1	5627	tags=23%, list=27%, signal=31%
BIOCARTA_CCR3_PATHWAY	17	0.27679363	0.64444363	0.8805369	1	1	5440	tags=29%, list=26%, signal=40%
WP_AUTOPHAGY	28	0.2530593	0.6424937	0.904878	1	1	6515	tags=36%, list=31%, signal=52%
REACTOME_BETA_CATENIN_PHOSPHORYLATION_CASCADE	17	0.27571702	0.64207786	0.8834197	1	1	996	tags=6%, list=5%, signal=6%
REACTOME_GRB2_EVENTS_IN_ERBB2_SIGNALING	16	0.28263766	0.6406086	0.8748353	1	1	3069	tags=19%, list=15%, signal=22%
WP_NAD_BIOSYNTHETIC_PATHWAYS	20	0.27035642	0.6403886	0.8946015	1	1	7296	tags=55%, list=35%, signal=84%
PID_RAC1_PATHWAY	54	0.22880788	0.63755345	0.95033115	1	1	5342	tags=20%, list=26%, signal=27%
WP_CILIOPATHIES	167	0.20675299	0.636568	0.98170733	1	1	6489	tags=26%, list=31%, signal=38%
WP_TRANSLATION_INHIBITORS_IN_CHRONICALLY_ACTIVATED_PDGFRA_CELLS	47	0.23415098	0.6353914	0.9478458	1	1	5348	tags=23%, list=26%, signal=31%
REACTOME_OXIDATIVE_STRESS_INDUCED_SENESCENCE	63	0.2237517	0.63406587	0.9448732	1	1	1386	tags=6%, list=7%, signal=7%
REACTOME_CASPASE_ACTIVATION_VIA_EXTRINSIC_APOPTOTIC_SIGNALLING_PATHWAY	25	0.2537351	0.62929744	0.89987326	1	1	6571	tags=32%, list=31%, signal=47%
PID_ANTHRAX_PATHWAY	17	0.27178764	0.62919563	0.9176319	1	1	2382	tags=12%, list=11%, signal=13%
REACTOME_ANTIGEN_ACTIVATES_B_CELL_RECEPTOR_BCR_LEADING_TO_GENERATION_OF_SECOND_MESSENGERS	30	0.24189857	0.6280028	0.921875	1	1	6988	tags=43%, list=33%, signal=65%
WP_IL17_SIGNALING_PATHWAY	27	0.24942642	0.62772804	0.92673993	1	1	7737	tags=44%, list=37%, signal=70%
KEGG_PROSTATE_CANCER	86	0.21532167	0.6272331	0.9610116	1	1	5963	tags=30%, list=29%, signal=42%
WP_PPARALPHA_PATHWAY	20	0.26136768	0.6262721	0.91857505	1	1	4326	tags=20%, list=21%, signal=25%
REACTOME_SIGNALING_BY_WNT_IN_CANCER	33	0.24323621	0.6253337	0.9188876	1	1	996	tags=6%, list=5%, signal=6%
PID_TNF_PATHWAY	45	0.22785808	0.6194894	0.9402985	1	1	2473	tags=9%, list=12%, signal=10%
PID_INSULIN_PATHWAY	42	0.23068698	0.6177025	0.94815665	1	1	3398	tags=12%, list=16%, signal=14%
WP_GLYCOSAMINOGLYCAN_DEGRADATION	17	0.26376656	0.61757416	0.90066224	1	1	9137	tags=65%, list=44%, signal=115%
WP_HEDGEHOG_SIGNALING_PATHWAY_WP4249	42	0.23156644	0.61716765	0.94657373	1	1	4391	tags=19%, list=21%, signal=24%
KEGG_EPITHELIAL_CELL_SIGNALING_IN_HELICOBACTER_PYLORI_INFECTION	65	0.21516848	0.6155106	0.970524	1	1	4319	tags=15%, list=21%, signal=19%
REACTOME_SHC1_EVENTS_IN_ERBB2_SIGNALING	22	0.2532296	0.6154985	0.9128205	1	1	6285	tags=36%, list=30%, signal=52%
WP_INTERFERON_TYPE_I_SIGNALING_PATHWAYS	54	0.22255827	0.61543953	0.9628378	1	1	7762	tags=37%, list=37%, signal=59%
REACTOME_RECYCLING_PATHWAY_OF_L1	48	0.22157627	0.61503863	0.95545655	1	1	4953	tags=25%, list=24%, signal=33%
KEGG_SNARE_INTERACTIONS_IN_VESICULAR_TRANSPORT	36	0.23412508	0.61415976	0.94483566	1	1	16028	tags=100%, list=77%, signal=427%
REACTOME_CDC42_GTPASE_CYCLE	154	0.20201284	0.6140118	0.9847095	1	1	6295	tags=26%, list=30%, signal=37%
REACTOME_RHOH_GTPASE_CYCLE	37	0.23443845	0.6140096	0.94799054	1	1	5906	tags=24%, list=28%, signal=34%
PID_MET_PATHWAY	78	0.21384165	0.61384326	0.9771739	1	1	8833	tags=40%, list=42%, signal=69%
REACTOME_RAC2_GTPASE_CYCLE	86	0.21484756	0.6135427	0.9745493	1	1	4876	tags=20%, list=23%, signal=26%
WP_BDNFTRKB_SIGNALING	33	0.23980922	0.6122753	0.9391408	1	1	4762	tags=18%, list=23%, signal=24%
PID_IFNG_PATHWAY	39	0.22791782	0.61102724	0.94104046	1	1	7762	tags=36%, list=37%, signal=57%
WP_PANCREATIC_ADENOCARCINOMA_PATHWAY	88	0.20590493	0.61055523	0.9808917	1	1	2559	tags=10%, list=12%, signal=12%
REACTOME_AUTOPHAGY	145	0.19975859	0.6029837	0.9878049	1	1	6515	tags=28%, list=31%, signal=40%
REACTOME_THE_ROLE_OF_NEF_IN_HIV_1_REPLICATION_AND_DISEASE_PATHOGENESIS	26	0.23887321	0.60254335	0.95238096	1	1	5693	tags=23%, list=27%, signal=32%
REACTOME_REGULATION_OF_SIGNALING_BY_CBL	21	0.25274816	0.6018609	0.93700784	1	1	5478	tags=29%, list=26%, signal=39%
PID_FOXO_PATHWAY	47	0.21801043	0.6012506	0.9647727	1	1	3950	tags=15%, list=19%, signal=18%
REACTOME_INLB_MEDIATED_ENTRY_OF_LISTERIA_MONOCYTOGENES_INTO_HOST_CELL	15	0.264976	0.6012388	0.9268293	1	1	1190	tags=7%, list=6%, signal=7%
REACTOME_RND1_GTPASE_CYCLE	42	0.2268221	0.60033053	0.96588236	1	1	5266	tags=24%, list=25%, signal=32%
REACTOME_EPHB_MEDIATED_FORWARD_SIGNALING	42	0.22132559	0.599647	0.95545137	1	1	15551	tags=98%, list=74%, signal=380%
REACTOME_SIGNALING_BY_TGF_BETA_RECEPTOR_COMPLEX	74	0.20944849	0.59924763	0.9806659	1	1	5352	tags=18%, list=26%, signal=24%
WP_MELANOMA	64	0.21278243	0.59912306	0.9668874	1	1	2525	tags=11%, list=12%, signal=12%
BIOCARTA_TID_PATHWAY	18	0.26018336	0.5913633	0.92941177	1	1	4319	tags=17%, list=21%, signal=21%
REACTOME_COPI_INDEPENDENT_GOLGI_TO_ER_RETROGRADE_TRAFFIC	50	0.2144322	0.5900031	0.9782609	1	1	3836	tags=18%, list=18%, signal=22%
WP_HOSTPATHOGEN_INTERACTION_OF_HUMAN_CORONAVIRUSES_AUTOPHAGY	19	0.24618407	0.5895293	0.9380645	1	1	6515	tags=42%, list=31%, signal=61%
REACTOME_CHROMATIN_MODIFYING_ENZYMES	200	0.19203842	0.588908	0.9959637	1	1	1810	tags=7%, list=9%, signal=8%
PID_CASPASE_PATHWAY	49	0.21462248	0.5869933	0.9766667	1	1	5808	tags=29%, list=28%, signal=39%
BIOCARTA_CTLA4_PATHWAY	15	0.2560938	0.58686537	0.91941875	1	1	1245	tags=13%, list=6%, signal=14%
KEGG_APOPTOSIS	82	0.20190795	0.58551276	0.98197246	1	1	5326	tags=22%, list=25%, signal=29%
WP_TP53_NETWORK	18	0.25887004	0.5852848	0.93402326	1	1	5326	tags=33%, list=25%, signal=45%
KEGG_REGULATION_OF_AUTOPHAGY	19	0.25416654	0.58459306	0.94750655	1	1	3646	tags=21%, list=17%, signal=25%
WP_TYPE_I_INTERFERON_INDUCTION_AND_SIGNALING_DURING_SARSCOV2_INFECTION	30	0.23227118	0.581939	0.94545454	1	1	1347	tags=7%, list=6%, signal=7%
PID_AR_PATHWAY	56	0.21085861	0.5811053	0.9726776	1	1	4268	tags=16%, list=20%, signal=20%
KEGG_CHRONIC_MYELOID_LEUKEMIA	72	0.20169392	0.5795971	0.9818182	1	1	5240	tags=25%, list=25%, signal=33%
REACTOME_NRIF_SIGNALS_CELL_DEATH_FROM_THE_NUCLEUS	16	0.25302467	0.5783559	0.9470109	1	1	7187	tags=38%, list=34%, signal=57%
REACTOME_SIGNALING_BY_PTK6	54	0.20345779	0.57717067	0.9709497	1	1	4030	tags=19%, list=19%, signal=23%
REACTOME_SIGNALING_BY_ALK_IN_CANCER	53	0.20885584	0.5747458	0.9722222	1	1	7807	tags=34%, list=37%, signal=54%
KEGG_INOSITOL_PHOSPHATE_METABOLISM	53	0.20425828	0.5726768	0.9740406	1	1	4315	tags=13%, list=21%, signal=17%
REACTOME_SIGNALING_BY_FGFR	83	0.19603774	0.569704	0.99466383	1	1	6349	tags=23%, list=30%, signal=33%
REACTOME_RAC1_GTPASE_CYCLE	178	0.18612035	0.5679324	1	1	1	6451	tags=25%, list=31%, signal=35%
REACTOME_SIGNALING_BY_ERBB2_IN_CANCER	26	0.2273997	0.567603	0.96401983	1	1	3069	tags=15%, list=15%, signal=18%
REACTOME_RHO_GTPASES_ACTIVATE_PAKS	21	0.23633252	0.56704384	0.9365285	1	1	7854	tags=38%, list=38%, signal=61%
REACTOME_SIGNALING_BY_CSF3_G_CSF	29	0.22296587	0.5666221	0.9502427	1	1	695	tags=3%, list=3%, signal=4%
REACTOME_TRANSLATION_OF_SARS_COV_1_STRUCTURAL_PROTEINS	29	0.22241811	0.5639272	0.9711191	1	1	8441	tags=45%, list=40%, signal=75%
REACTOME_N_GLYCAN_TRIMMING_IN_THE_ER_AND_CALNEXIN_CALRETICULIN_CYCLE	34	0.21562028	0.56375605	0.9703088	1	1	6987	tags=32%, list=33%, signal=49%
REACTOME_LISTERIA_MONOCYTOGENES_ENTRY_INTO_HOST_CELLS	20	0.23992492	0.5630582	0.94895285	1	1	1190	tags=5%, list=6%, signal=5%
REACTOME_BUDDING_AND_MATURATION_OF_HIV_VIRION	28	0.2197466	0.5626093	0.9688279	1	1	844	tags=4%, list=4%, signal=4%
KEGG_COLORECTAL_CANCER	61	0.1967475	0.5622809	0.98657715	1	1	2559	tags=10%, list=12%, signal=11%
REACTOME_VEGFR2_MEDIATED_VASCULAR_PERMEABILITY	27	0.22347623	0.5592068	0.97103274	1	1	4979	tags=22%, list=24%, signal=29%
REACTOME_TP53_REGULATES_METABOLIC_GENES	82	0.19021127	0.55684894	0.9903537	1	1	3113	tags=9%, list=15%, signal=10%
PID_HDAC_CLASSI_PATHWAY	61	0.19713385	0.55586594	0.9869281	1	1	5461	tags=21%, list=26%, signal=29%
PID_CERAMIDE_PATHWAY	43	0.20626517	0.5553721	0.9814385	1	1	5808	tags=23%, list=28%, signal=32%
WP_OVARIAN_INFERTILITY	28	0.2228575	0.5553633	0.96125907	1	1	5047	tags=25%, list=24%, signal=33%
KEGG_ALZHEIMERS_DISEASE	150	0.18401426	0.55492777	0.9989775	1	1	3021	tags=9%, list=14%, signal=10%
REACTOME_RHO_GTPASE_CYCLE	441	0.17651655	0.55339605	1	1	1	5165	tags=17%, list=25%, signal=23%
REACTOME_INTERFERON_SIGNALING	181	0.18075792	0.55240345	1	1	1	4388	tags=15%, list=21%, signal=19%
BIOCARTA_MCALPAIN_PATHWAY	17	0.23777725	0.5513638	0.9653402	1	1	5960	tags=29%, list=28%, signal=41%
REACTOME_SARS_COV_INFECTIONS	153	0.18304287	0.5512236	1	1	1	3757	tags=10%, list=18%, signal=12%
REACTOME_APOPTOTIC_EXECUTION_PHASE	45	0.20365442	0.5511283	0.98858446	1	1	2444	tags=11%, list=12%, signal=13%
REACTOME_GLYCOSPHINGOLIPID_METABOLISM	42	0.20409687	0.5511063	0.985426	1	1	5377	tags=24%, list=26%, signal=32%
REACTOME_SYNTHESIS_OF_BILE_ACIDS_AND_BILE_SALTS_VIA_7ALPHA_HYDROXYCHOLESTEROL	21	0.22695576	0.5485835	0.967825	1	1	4812	tags=19%, list=23%, signal=25%
REACTOME_SIGNALING_BY_ERBB2_ECD_MUTANTS	16	0.24047853	0.54425156	0.9680851	1	1	2912	tags=13%, list=14%, signal=15%
REACTOME_DISEASES_OF_IMMUNE_SYSTEM	31	0.2067213	0.5427393	0.9708738	1	1	4319	tags=19%, list=21%, signal=24%
REACTOME_XENOBIOTICS	19	0.23044954	0.541956	0.9597925	1	1	6973	tags=47%, list=33%, signal=71%
REACTOME_P75_NTR_RECEPTOR_MEDIATED_SIGNALLING	96	0.18360978	0.54164535	0.9979014	1	1	7749	tags=33%, list=37%, signal=53%
REACTOME_SIGNALING_BY_CYTOSOLIC_FGFR1_FUSION_MUTANTS	17	0.23378053	0.5413851	0.9706275	1	1	7638	tags=35%, list=37%, signal=56%
WP_MAP3K1_ROLE_IN_PROMOTING_AND_BLOCKING_GONADAL_DETERMINATION	16	0.2347748	0.5407718	0.9663978	1	1	9618	tags=50%, list=46%, signal=92%
KEGG_STEROID_BIOSYNTHESIS	17	0.23121405	0.54050845	0.9632546	1	1	981	tags=6%, list=5%, signal=6%
SIG_BCR_SIGNALING_PATHWAY	44	0.19759236	0.5392485	0.9827388	1	1	7737	tags=34%, list=37%, signal=54%
KEGG_PHOSPHATIDYLINOSITOL_SIGNALING_SYSTEM	73	0.18519504	0.53853965	0.9957627	1	1	4612	tags=16%, list=22%, signal=21%
WP_HEDGEHOG_SIGNALING_PATHWAY_WP47	16	0.23466134	0.5321562	0.9582772	1	1	6672	tags=31%, list=32%, signal=46%
REACTOME_INCRETIN_SYNTHESIS_SECRETION_AND_INACTIVATION	19	0.2251101	0.53045	0.9724771	1	1	999	tags=5%, list=5%, signal=6%
REACTOME_SIGNALING_BY_PDGFR_IN_DISEASE	20	0.22396022	0.5302354	0.96899223	1	1	8315	tags=45%, list=40%, signal=75%
REACTOME_RHO_GTPASES_ACTIVATE_IQGAPS	31	0.20547578	0.53022903	0.9791155	1	1	4953	tags=26%, list=24%, signal=34%
REACTOME_PHOSPHOLIPID_METABOLISM	199	0.1735652	0.53020644	1	1	1	5437	tags=20%, list=26%, signal=26%
REACTOME_CONSTITUTIVE_SIGNALING_BY_EGFRVIII	15	0.234823	0.530178	0.9687924	1	1	2912	tags=13%, list=14%, signal=15%
REACTOME_SIGNALING_BY_FGFR2	69	0.18558155	0.52979857	0.9967742	1	1	615	tags=3%, list=3%, signal=3%
REACTOME_INSULIN_RECEPTOR_RECYCLING	23	0.21384282	0.5257727	0.9755784	1	1	3798	tags=17%, list=18%, signal=21%
REACTOME_JNK_C_JUN_KINASES_PHOSPHORYLATION_AND_ACTIVATION_MEDIATED_BY_ACTIVATED_HUMAN_TAK1	22	0.2167585	0.5203282	0.9701121	1	1	1107	tags=5%, list=5%, signal=5%
REACTOME_ESR_MEDIATED_SIGNALING	158	0.17197274	0.51871043	1	1	1	4002	tags=13%, list=19%, signal=16%
REACTOME_SUMOYLATION_OF_TRANSCRIPTION_COFACTORS	43	0.19295347	0.5173788	0.99199086	1	1	8906	tags=37%, list=43%, signal=65%
REACTOME_INSERTION_OF_TAIL_ANCHORED_PROTEINS_INTO_THE_ENDOPLASMIC_RETICULUM_MEMBRANE	19	0.21997148	0.5168203	0.97153944	1	1	2025	tags=11%, list=10%, signal=12%
BIOCARTA_DEATH_PATHWAY	29	0.20642154	0.51431495	0.984375	1	1	5635	tags=28%, list=27%, signal=38%
BIOCARTA_ERAD_PATHWAY	18	0.21817112	0.51222664	0.9814077	1	1	6896	tags=28%, list=33%, signal=41%
REACTOME_TRANSLOCATION_OF_SLC2A4_GLUT4_TO_THE_PLASMA_MEMBRANE	69	0.17934948	0.5091058	0.9967249	1	1	5654	tags=20%, list=27%, signal=28%
REACTOME_SIGNALING_BY_EGFR_IN_CANCER	25	0.2073828	0.5071822	0.981203	1	1	2912	tags=12%, list=14%, signal=14%
REACTOME_CLATHRIN_MEDIATED_ENDOCYTOSIS	142	0.1690851	0.5046466	1	1	1	4881	tags=15%, list=23%, signal=19%
WP_REGULATION_OF_APOPTOSIS_BY_PARATHYROID_HORMONERELATED_PROTEIN	20	0.21115862	0.5032488	0.9872612	1	1	3385	tags=15%, list=16%, signal=18%
WP_PATHWAYS_AFFECTED_IN_ADENOID_CYSTIC_CARCINOMA	62	0.17666642	0.50064707	0.9956616	1	1	6648	tags=31%, list=32%, signal=45%
REACTOME_AMINO_ACIDS_REGULATE_MTORC1	52	0.18314303	0.5000747	0.99441344	1	1	4321	tags=13%, list=21%, signal=17%
KEGG_LYSOSOME	120	0.16515553	0.49502885	0.99897015	1	1	5377	tags=20%, list=26%, signal=27%
REACTOME_INTRA_GOLGI_TRAFFIC	44	0.18342446	0.4935123	0.99404055	1	1	9083	tags=43%, list=43%, signal=76%
PID_HDAC_CLASSII_PATHWAY	33	0.19003591	0.4926092	0.9882353	1	1	5461	tags=27%, list=26%, signal=37%
REACTOME_RHOD_GTPASE_CYCLE	52	0.17754342	0.48892877	0.99667406	1	1	5522	tags=19%, list=26%, signal=26%
PID_P38_MKK3_6PATHWAY	26	0.1933764	0.4874145	0.97919214	1	1	7375	tags=35%, list=35%, signal=53%
REACTOME_ASPARAGINE_N_LINKED_GLYCOSYLATION	292	0.1577625	0.48708797	1	1	1	5184	tags=15%, list=25%, signal=20%
WP_OVERVIEW_OF_INTERFERONSMEDIATED_SIGNALING_PATHWAY	16	0.21132386	0.48630327	0.9734748	1	1	8928	tags=56%, list=43%, signal=98%
PID_ARF_3PATHWAY	19	0.20163298	0.48326856	0.9856397	1	1	7689	tags=32%, list=37%, signal=50%
REACTOME_MTORC1_MEDIATED_SIGNALLING	24	0.19415665	0.48326093	0.9873257	1	1	737	tags=4%, list=4%, signal=4%
PID_CDC42_REG_PATHWAY	30	0.18905695	0.4763678	0.99164677	1	1	5001	tags=20%, list=24%, signal=26%
REACTOME_RHO_GTPASES_ACTIVATE_PKNS	32	0.18316466	0.47545782	0.9880952	1	1	8200	tags=31%, list=39%, signal=51%
REACTOME_IRE1ALPHA_ACTIVATES_CHAPERONES	50	0.17362227	0.47280723	1	1	1	7807	tags=34%, list=37%, signal=54%
WP_G13_SIGNALING_PATHWAY	39	0.1781695	0.47118804	0.9988439	1	1	17197	tags=100%, list=82%, signal=561%
PID_ERBB1_RECEPTOR_PROXIMAL_PATHWAY	35	0.1799246	0.46752682	0.99415207	1	1	8356	tags=40%, list=40%, signal=66%
BIOCARTA_AKT_PATHWAY	20	0.19595397	0.4647207	0.99093264	1	1	4319	tags=20%, list=21%, signal=25%
SIG_CHEMOTAXIS	43	0.1726283	0.46342385	0.9977221	1	1	6477	tags=23%, list=31%, signal=34%
REACTOME_DEADENYLATION_OF_MRNA	24	0.18647408	0.46248153	0.99501866	1	1	5348	tags=25%, list=26%, signal=34%
REACTOME_RAF_ACTIVATION	34	0.17807584	0.45915762	0.99876696	1	1	3485	tags=9%, list=17%, signal=11%
REACTOME_MTOR_SIGNALLING	40	0.1677169	0.4547232	0.9976932	1	1	4791	tags=13%, list=23%, signal=16%
REACTOME_RHOU_GTPASE_CYCLE	40	0.16929494	0.45244896	0.9965358	1	1	8998	tags=35%, list=43%, signal=61%
BIOCARTA_GCR_PATHWAY	17	0.19723542	0.45033237	0.9870634	1	1	4739	tags=24%, list=23%, signal=30%
REACTOME_SIGNALING_BY_FGFR_IN_DISEASE	58	0.15812443	0.4423164	0.9988938	1	1	6349	tags=24%, list=30%, signal=35%
REACTOME_RHOA_GTPASE_CYCLE	149	0.14491798	0.43775126	1	1	1	6219	tags=22%, list=30%, signal=31%
REACTOME_SIGNALING_BY_KIT_IN_DISEASE	20	0.1795554	0.4285679	0.9960887	1	1	1245	tags=5%, list=6%, signal=5%
KEGG_RIG_I_LIKE_RECEPTOR_SIGNALING_PATHWAY	53	0.15386255	0.42709747	0.99889624	1	1	4319	tags=15%, list=21%, signal=19%
REACTOME_COPI_MEDIATED_ANTEROGRADE_TRANSPORT	97	0.14473115	0.42664176	1	1	1	4953	tags=15%, list=24%, signal=20%
PID_PI3K_PLC_TRK_PATHWAY	36	0.16217035	0.4242366	1	1	1	7788	tags=31%, list=37%, signal=49%
WP_NOVEL_INTRACELLULAR_COMPONENTS_OF_RIGILIKE_RECEPTOR_RLR_PATHWAY	55	0.14854084	0.41640142	1	1	1	4319	tags=15%, list=21%, signal=18%
REACTOME_HDACS_DEACETYLATE_HISTONES	30	0.1601103	0.41075346	0.99401915	1	1	8164	tags=40%, list=39%, signal=66%
WP_INHIBITION_OF_EXOSOME_BIOGENESIS_AND_SECRETION_BY_MANUMYCIN_A_IN_CRPC_CELLS	18	0.17598091	0.40992805	0.9974392	1	1	17239	tags=100%, list=82%, signal=568%
BIOCARTA_BIOPEPTIDES_PATHWAY	28	0.16062827	0.4058331	1	1	1	7737	tags=32%, list=37%, signal=51%
BIOCARTA_HCMV_PATHWAY	16	0.17394944	0.3950253	1	1	1	5342	tags=19%, list=26%, signal=25%
REACTOME_TRAF6_MEDIATED_IRF7_ACTIVATION	16	0.17194518	0.39345986	0.9986523	1	1	17323	tags=100%, list=83%, signal=581%
REACTOME_CONSTITUTIVE_SIGNALING_BY_LIGAND_RESPONSIVE_EGFR_CANCER_VARIANTS	19	0.16530365	0.39334753	0.9974392	1	1	2912	tags=11%, list=14%, signal=12%
KEGG_ETHER_LIPID_METABOLISM	27	0.14893065	0.3766454	1	1	1	6451	tags=26%, list=31%, signal=37%
WP_PROTEOGLYCAN_BIOSYNTHESIS	17	0.1647438	0.37491402	0.99733335	1	1	3348	tags=12%, list=16%, signal=14%
PID_CDC42_PATHWAY	69	0.12285996	0.34957123	1	1	1	7762	tags=26%, list=37%, signal=41%
PID_NEPHRIN_NEPH1_PATHWAY	30	0.13487302	0.34588045	1	0.9998335	1	9760	tags=53%, list=47%, signal=100%
