# Supplementary material for: Formal Meta-Analysis of Hypoxic Gene Expression Profiles Reveals a Universal Gene Signature
Source: Biomedicines. 2022 Sep 8;10(9):2229. doi: 10.3390/biomedicines10092229 (PMC9496516; doi:10.3390/biomedicines10092229)
Supplement: Supplementary file 1 [file biomedicines-10-02229-s001.zip › S8_CoreGenes.csv]

Gene_Symbol	N	Beta	pval	adjP	GSE101526_HCT116_24_1	GSE104193_MDA-MB-231_24_0.5	GSE104193_MCF10A_24_0.5	GSE106305_PC3_24_0.2	GSE106305_LNCaP_24_0.2	GSE107029_HUVEC_12_0.2	GSE107029_HUVEC_24_0.2	GSE108013_Brain_tumor_primary_24_3	GSE108676_iPS_cardio_24_1	GSE108833_MDA-MB-231_24_1	GSE111570_DSC_24_1	GSE112137_IPS_brain_24_1	GSE112137_IPS_brain_48_1	GSE117192_iPS_cardio_6_1	GSE118046_dental_pulp_4_3	GSE118046_dental_pulp_48_3	GSE118530_HUVEC_6_1	GSE120675_HeLa_16_1	GSE120886_HPTEC_HCK8_16_0.5	GSE120886_HepG2_16_0.5	GSE123856_UFH-001_16_1	GSE131378_A549_48_0.5	GSE131378_MCF-7_48_0.5	GSE131379_HeLa_24_0.2	GSE132624_501mel_12_1	GSE132624_501mel_24_1	GSE132624_501mel_48_1	GSE132624_IGR37_12_1	GSE132624_IGR37_24_1	GSE132624_IGR37_48_1	GSE132624_IGR39_12_1	GSE132624_IGR39_24_1	GSE132624_IGR39_48_1	GSE135487_Patient_Derived_Neuroblastoma_24_0.1	GSE139673_AsPC-1_24_1	GSE139678_HUVEC_8_1	GSE144424_iPS_cardio_6_1	GSE144527_K562_24_1	GSE145108_RKO_24_1	GSE145108_A549_24_1	GSE145108_H460_24_1	GSE145774_HUVEC_24_1	GSE145774_HUVEC_6_1	GSE149132_T47D_48_0.5	GSE151610_ARPE-19_4_0.5
ANKRD37	69	3.29289569342787	1.36811550511714e-22	1.83931647000566e-19	7.69789362514725	2.86217212990488	2.26224390610685	2.75422353738568	1.73840300208285	2.58120766541828	2.84937951248767	3.09094623376522	6.69674426862606	1.62731571252714	4.39088866716302	2.50109602353309	2.36086023517788	2.89375880233944	1.32914325534329	2.32608599486587	2.11242217526935	2.46675590295954	1.71817069847039	3.47046908078781	2.67396789656402	2.10937940893639	4.28951078427739	6.0514013302141	3.54827834497744	2.12987942127744	2.2988237865571	2.40847361951085	2.32442622815017	2.50334469801712	1.52866147589671	2.90545437943691	2.89615690354183	1.72765659059339	2.96351128835673	4.05036620639927	1.7497904159057	3.34026655812981	2.97633190648097	1.78944093582688	5.33442688378456	3.02068206407477	3.07957119425541	2.23717216830894	2.17731271045407
NDRG1	69	3.13219428438619	8.90885545121942e-20	6.37471714899836e-17	5.09433951524955	3.78959588787304	4.09936609566704	4.5490577110818	2.96278110373296	1.68052562774797	0.679225351199081	5.30465086898221	5.80433527362603	3.07620480073513	2.89053082071446	1.57267165478683	1.60996354747679	2.25111582235483	1.03191143932124	2.43608127417947	1.46221492321811	3.59983961285349	4.69398592286188	3.57030885821134	3.44940457536313	3.98125733123081	5.32716451730749	6.95307051290075	3.91855812703181	2.84408995232592	3.43575693264969	3.10391435036075	2.62412482797086	2.81999856397343	2.63098925505015	5.77363894588947	5.5252806979898	1.25552257979821	3.07601395750966	1.87219189983771	1.30573878410379	0.472469288365189	4.51272006091043	4.57790164020989	6.06188001911996	0.248645750487948	-0.00504682790104639	4.32456203388202	4.89985573446201
ADM	68	2.83683330384547	6.26924164447069e-24	1.26422107416044e-20	4.71251833014559	0.755346280874387	2.03827978263754	4.98708397716385	2.41159191409451	2.72458890063531	2.45792235256322	4.18945451632205	5.28981395824772	2.06913496962377	2.38636581187417	3.23945873590543	2.92480954012282	3.52600625148388	0.537231777728957	1.76219609708777	2.68346252344966	3.07997493519356	1.74271447236243	3.0254115504808	2.9448628659126	2.37502089395663	6.17652867090874	5.10583966049441	2.98373603004259	2.07660845084385	2.49409026886634	1.41687664326783	0.00955284808864519	1.13411977847439	1.33866233146882	3.71870410392062	3.75949699341755	2.41240065851218	1.68622987953449	2.67429640238393	2.49085486423763	3.07825265782802	1.86482737579381	0.601413176618885	3.22726858520384	1.50283246095536	1.44705772517915	2.66258431232282	2.67017686013928
MIR210HG	69	2.81906057240648	5.65455465922237e-24	1.25429331450871e-20	3.70817703703859	3.31501769770359	2.69493525511216	1.72126365152813	2.08148670644898	2.53333948934944	2.88295194541071	1.93874188921625	2.05446446620766	1.78228224980613	3.94585656193101	1.78351213468389	2.23816958354836	0.658611189031768	3.08947416907845	5.1420614652514	1.91385741864883	3.65301635835121	3.22134135381572	3.73639715246189	1.9441457766387	2.13999343582192	2.26616159538752	3.77154263769227	5.04638514761601	4.16642365338039	4.40846216887618	3.39483881174539	2.78643082127098	2.92058296580543	1.23593035901544	3.99349265767189	4.42243468829728	3.74459611701138	3.99991543745642	3.48363051979674	0.0915064424566393	2.94684930499072	3.30691775204246	2.81590082531506	4.03274387587135	4.15144496605264	4.45615979127741	2.54832236250012	0.83048742074867
IGFBP3	66	2.63261267233213	1.20622675643332e-13	1.08766349232536e-11	4.99662290907057	0.335705019814357	1.94967679629848	4.79970527593319	1.3877736500609	1.51350776081609	3.04606098775154	-0.475262198041119	1.36015157426221	2.55604309471325	4.1103584662476	1.71730073477316	1.50028937221672	0.721213495475907	0.332145769459558	2.0157103559774	3.8063526774142	1.84755206775673	2.08344623059055	3.79433541547712	4.16946241108054	2.23116722571201	2.85363631193731	4.47906712074986	0.131347813851314	0.265073816324657	0.743352179946694	1.04711139688745	1.25616231506985	1.45662200995431	1.50717651808122	2.43839713201403	2.57309996799786	0.338540227170196	0.806470775781111	1.6042505515822	0.606691106617553	0.214877720957016	-0.54376603125596	1.8369964874887	3.84231614832385	-0.394480940160974	-0.314199167000207	6.95607244706453	2.78188060700208
PFKFB4	70	2.62164376967773	9.75972202422501e-23	1.44326769294239e-19	3.74751006598133	2.52984409132209	3.12331600874529	2.89733141109553	2.88558459349614	3.62378310304023	2.15360157370958	1.75747895895925	5.97232102650763	1.57999667859977	2.95747898014974	2.39818238613515	2.68849158738862	2.53571277133571	2.03863478720713	1.98051665394536	3.88307485620878	4.0295996058223	2.86438304830477	4.29649521804231	3.06987440288263	3.4133745287972	4.85877228828908	4.62756572142516	4.89666395355115	4.27198403886989	4.01273911703661	2.13349239538501	1.32014013466281	1.72214015765516	1.43978663882438	3.84186231302164	4.20505746757459	2.04579322217009	3.6357956131913	3.8639305157513	1.57579529822834	2.16607963186628	2.98536181687391	0.46577005916981	4.82540321501772	2.16522650782307	2.36465567411659	2.5210323036643	3.19471220482195
STC1	63	2.56382410197294	1.78719641828495e-16	4.83458426224351e-14	1.15775755518234	0.7236029298406	2.60871290860308	3.13291674126561	5.51944634178304	4.51145436001626	3.84903985967162	3.78888761038843	5.15387604290492	2.12789561773525	1.25907512589848	2.93283795259573	2.87843550350953	1.85848800980697	0.947671968311564	1.93949144941139	2.69810841067514	8.59588616062559	5.86291839701599	4.38577025092162	0.966875262710054	2.80677687214222	0.812945481643244	6.62822126130584	5.53561192288642	4.78703783848705	5.00279728181246	3.16642630829894	1.01050656723024	0.963093675949466	1.43438768294877	4.53280446247999	4.53078699998355	1.89158894881034	0.949510619459964	2.30655926064271	0.634885059902336	0.805631167726305	0.443758210000512	1.84529339664248	4.52932517841443	1.65252615413058	1.07468687818865	-0.798454059726441	2.63627434509804
TMEM45A	69	2.38491716418134	1.68568960901179e-18	9.07374397906564e-16	2.1456533623379	2.5947703700211	4.12599949085772	2.96917703383821	1.96552863529631	2.21324739641147	1.5575929691191	2.81028233291693	2.57368617808606	2.67532437595996	0.535169598689159	2.63800520251548	2.90046287319005	0.355880920691046	0.24511566313906	1.44444704457251	1.87728929683611	3.54245668511262	3.03744836510813	2.45471151192227	2.52171679887518	3.09508756477944	6.07430019322646	3.29689038227958	5.48475950504739	4.9576546073822	4.50472728960942	2.77255405696471	3.06813088499156	2.42853594327739	1.29622611290656	3.62391109464289	3.10850322055195	1.79077999891392	3.16847604845118	3.21214490389721	-0.0487910651626303	0.893438397511726	2.18830638461257	2.71657255040165	4.46076839547196	0.329220586219667	0.203664473367559	5.44644503877773	2.02449824182836
GPR146	63	2.32141212846664	1.59161295475904e-15	3.12435031526239e-13	2.60789477874348	1.04898977774777	4.50784419178001	3.35812612876043	2.272926515989	1.50093845167767	0.532323376006321	1.71749488714433	4.18590321386945	2.11404521892746	5.83937758919632	2.02738664606398	2.75721958664472	2.32285563122589	2.78712197240465	1.91203576046828	1.1583922329433	4.47705996369887	1.52131652830978	1.96894711733209	3.21053746915039	2.46154340762122	3.04358966123156	8.84835784829156	2.69163377164214	1.77401625013408	1.91221652195123	2.29844668137554	1.53331251367828	1.78970547480055	0.76155000927768	4.5410110295553	4.21877907025472	0.649049268464347	1.9329147142175	0.590089795571528	0.762864364599855	0.336420407491812	2.7909346935728	1.64181558108654	5.67231944974437	1.45567675055214	1.21099952214103	1.95464412573365	1.71573511479734
ALDOC	66	2.26207277080801	2.22650450432297e-21	2.14731838760401e-18	3.95048005815367	2.63755393352985	3.1757374096528	2.4137145548438	0.887460256481493	2.64305830161968	1.53062044151998	2.73818313254268	3.4913475765651	1.89537309197184	2.55677683514069	1.25185650627666	1.16437271299859	0.473906620421745	0.536745097306892	2.03299102615581	0.358222115393048	4.44744964513766	0.990029793068055	2.71155945650616	1.91932403089991	4.11360899094938	4.94616336370107	3.50436461679856	3.05489130899203	3.17575999306341	2.76992714210348	-0.0830127128514054	0.457037262541891	1.29617243218149	-0.790678924004544	0.664565575187123	0.0775843875292336	2.78967973663977	2.08616973075252	0.670048783149762	0.0392622457432576	1.83560335245593	3.31925601669345	3.13347493487092	3.71760404245598	2.41103472890528	1.02013368004793	1.69348437698042	0.72731118247323
BHLHE40	70	2.16232912773327	3.65671601638402e-22	4.5062930375239e-19	4.02574169914135	1.82947533549782	2.30290850034572	2.89945920875178	2.38514060220703	2.43255536317556	2.36892042036103	2.15042985962224	4.34574705940294	2.10138197590057	4.29153755928861	2.49833837510297	2.22777432932141	3.3558094178503	0.774929073210131	0.665998959795909	2.17478425145956	1.43753286296414	3.24398720777334	2.92910644152841	1.20564366325682	1.01604907147807	4.23410270740202	4.67385479718977	2.79865716604959	2.00434686653319	2.19395102702635	1.16464226899536	0.79729528586044	1.15160674744038	1.24975661967249	3.05437943239207	2.7769312171666	1.70156648445375	0.985389068063835	1.59143928968528	2.70539100021559	1.67251649971279	2.21832146972193	0.653158544828603	1.73260929186589	1.05216727310113	0.917423166224251	1.20516726927135	2.34646777017268
BNIP3	69	2.15345849058668	4.062139055539e-23	6.43616918071187e-20	2.84535904468984	2.67060502366706	2.50096671379294	2.95504394803962	2.01034337848175	1.92964247906173	1.5495855740751	2.13987036434782	4.2143564643214	1.63095279517222	3.2168272145491	2.0426012357647	2.11987336743631	1.35967381250905	1.2463402305259	2.41863599420959	1.63078201006446	4.23437835589385	2.67852327282649	2.53186777894654	2.17084666334201	1.84465777845601	4.31526327092143	3.47561437109045	4.09548585707769	3.75424901988946	3.63009143950626	2.11779884103849	2.20771635406797	2.00814524695663	1.00248600233994	2.96497519897839	2.44585107576936	2.17914654922487	1.01731084287664	2.24739473000694	0.516490913542198	1.17781923740218	-0.03526339519901	1.80404420079739	3.2124164594952	1.75426296754147	1.42398418107309	2.39036846667852	1.60456217194063
SLC2A3	70	2.13074552510726	4.31967692751413e-22	5.04310913716412e-19	5.25340225561588	1.00453651730092	1.32629155256716	1.80355643255282	1.84904673901969	2.61530194245771	2.40365750333582	3.28428453028663	3.3467526980806	1.5110843823813	1.62987105801187	1.76816979881931	1.5950935710948	2.11139697623108	0.382595423519614	1.0427920803775	2.18431169865469	2.46563237617796	1.58517191887251	2.79571056274194	2.68257197849382	3.99828512587792	0.43206187640291	5.6389572647739	2.74540291114676	1.91672902337313	2.24326922098905	1.66278728448893	0.706780914201944	1.23403615901327	0.977927179793024	2.04509159074989	2.36172038967928	1.15615444909035	4.62249134955252	1.95686715945477	1.20421320303531	0.727154735124117	1.85412465718065	1.55417001170134	3.76513002422135	0.717355377321431	0.967462803023823	2.93107703658299	1.98231646708778
ENO2	69	2.12249693657363	3.46355339899664e-23	5.90988780742642e-20	3.56942487533999	1.22989075346466	2.5259874969333	2.30139626098886	2.56873235264357	2.29573291515177	1.86081323641429	2.43015669150249	4.98171868744848	1.73057059467647	3.31119398670539	0.95930985714342	1.01166250505207	1.39333871408341	0.957300817115443	2.08912570141911	2.30189216525606	3.41383868136608	2.35386680870107	1.64274965486448	2.7384781339836	2.17511987769915	4.29758006223171	0.63416135515909	2.80000729564113	2.07237558784246	2.07626218449461	1.94587731812037	1.68545160720408	1.91884035907089	0.183029318905321	0.440831646942141	0.356827808609322	0.512769066263445	2.88929882037705	2.60199502233341	0.632112078694623	1.32914306662936	2.3268702661942	2.1532753407636	5.07831908978682	1.48746906500394	1.22298872635841	2.01478130051467	1.84985340528493
DDIT4	70	2.06366524286691	1.34100209563235e-18	7.62720730392735e-16	4.76109416643921	0.927265619833258	1.56768604933507	2.60710745196078	0.230483849873868	1.85953425419507	1.0892359383284	1.68245816785137	4.67156978280935	2.26862109583157	1.78661470657682	2.34575207386429	1.87396891204901	3.28313940235992	2.06156939306802	-0.343745574701936	2.03538814821175	1.2790054964418	2.42186381482785	2.06235157447783	0.610195053720206	1.55246198280415	3.95733125269243	2.97193696244697	3.22278282855056	2.21830560974752	2.53804589865741	1.51255482639173	0.697058982683329	1.0417068620979	1.54829364167863	5.9656154183339	6.13588695730616	2.24493091752115	1.43246691428711	1.62977506556304	2.28559447517915	0.529720777565115	2.25587832161742	0.829036474975693	1.48431092506702	1.98679216997123	1.86096950829352	4.17252724785411	1.83924311859092
SLC2A1	70	2.03914100234699	1.9501508200819e-26	1.44194151636855e-22	3.11831884407407	0.399831372510089	1.73253997043409	2.36711888644157	2.15294309782641	2.35539389356829	2.34629579619259	3.51032867763808	5.32566560016364	1.36536986306978	2.72384765981997	2.04403779669433	2.07639937453987	2.06340947983086	0.986952015269308	1.63449690375088	2.87905528284872	1.73243966820665	1.86834237807273	0.9125630501543	1.33982182280028	2.14638202527595	0.544964557558264	2.63296043356976	2.25378056996119	1.84436205412366	1.90314527811908	2.22959304728115	1.78517873500012	1.78725443209793	1.61997909258095	2.10603527599961	1.68956333393835	1.41521042513728	1.95175511225839	3.49995101410716	1.50051271333349	0.179492906748793	1.68825041939591	1.74417591346984	1.18683282757532	1.71579907988887	2.06156827361025	1.76649655929107	1.65576370579834
AK4	70	1.99235025256921	9.5977770649399e-19	5.75399705012154e-16	1.48025089249433	1.36773443399149	1.62198836667421	1.7684383150447	1.14745522736493	3.14966418530043	3.59367932465556	0.94735679244236	2.74937848207613	0.658980127327499	6.15431799031805	1.73019293152223	1.59058680999183	1.20927247017029	1.76534706839986	3.36288112856134	2.75094090216432	2.61851479003877	2.07564351604001	0.749901329290415	1.05540202466965	2.05767253551075	2.82328052187068	1.55992139523424	2.45388693897307	2.63837314823572	2.21042415755637	2.10182443817504	2.10535471300983	2.11347930250511	1.0767347797616	1.45654968273906	1.07935372233552	2.48384323528606	0.651230504248372	2.87755978057	0.513748863493769	0.56749765128655	0.269769809374998	2.23930939368607	2.59729445218444	3.20674011068504	2.80574536540523	0.813112738688458	1.49550012722221
P4HA1	70	1.91582884957086	2.4915202721838e-27	2.76334513387905e-23	3.46910358647332	2.61325197198199	1.82104346198186	1.84513941327945	1.66917860810768	1.63294766660554	2.25137621491102	2.25762907603497	3.78124163751862	1.35404571513956	0.63135482590688	2.44121596899682	2.20058530437254	0.708494079996444	0.534266638174702	1.84509930011125	2.32071270053486	2.04640104160943	1.74894897683314	2.00317834610621	1.93587249853557	1.83148054184609	2.72731650254001	2.40571284815443	2.08877608347545	1.647826005993	1.46739049831801	1.11632903539058	1.07598631976925	1.19183373726928	0.481721316797951	2.69156298773134	2.29286592431656	1.39837163003817	2.27818472020804	2.02108463908999	0.28192103908918	1.72182160445984	2.66184657084756	2.01981614378268	2.63702022232108	1.09237166123892	0.793561173498951	2.99176825588838	2.24059671189936
PDK1	70	1.89077667260134	6.35719290508059e-21	5.64061012081991e-18	3.34444720277364	1.79891139959504	1.60157356995909	2.04794287758575	2.03703521122954	1.16510419510486	1.5672040276851	1.80102914990841	3.08836383166392	1.34506789926783	1.48141036688173	2.32870778635915	2.4090670489854	0.980056853572509	1.6788914416091	3.06412182946644	1.55111704810389	3.12494532297109	2.19103979373879	3.22936523837023	1.61479862946521	2.68443112564904	3.96324837719868	2.55083879211951	4.23198987449625	4.11489289738681	4.10189601338333	2.79101145085861	2.54295138728844	2.7761187340595	1.16630135242516	2.85724453891098	2.92599699143298	2.7843831086744	1.33118548124218	2.09871148324698	0.510142447146551	2.39416034396212	1.5371649349025	1.74823153547292	1.37414376141312	1.62024551507057	1.81305190724616	2.3123842321039	-0.0208265756433967
BNIP3L	70	1.84417385141055	1.07322047739138e-24	2.97577207868696e-21	2.85016927902523	1.1374001695869	2.408974086134	2.55439523844594	2.17653218321138	1.80407290829769	1.81139340848931	1.88549864627614	2.56762319706531	1.59454227640223	1.13473139185752	1.12989038285966	1.26715030891912	1.22319072689788	0.629627377275878	0.913168559570194	0.92900430224228	2.48535523848631	1.92789229467853	3.44565442490022	2.42172213495714	2.26789030877662	2.92931400210049	3.28599950102249	3.23919180582345	2.94911739018667	2.62284152590711	1.38300370740033	1.27809997199755	1.26668078910898	1.0182436479649	3.30110071862807	3.15101349756091	1.60055884784964	1.63052172903516	1.40252343282322	0.758294842265635	1.43924622825403	2.62859182685863	1.80064390308701	4.12425158239237	1.4810715103417	0.941970221915412	2.02908374966636	1.28226120993944
MXI1	69	1.82612305272767	8.22005361949982e-28	1.82337229387745e-23	2.5275183814073	0.769196162161621	1.81853130164816	2.31742507666276	1.33320114231307	2.78406069511609	2.63225935303599	1.58582496285342	3.64710135969592	1.36641716357484	2.41014259107264	1.626497438742	1.40925659614477	1.68682537304526	0.839937784736268	1.2218773668379	2.50996195212663	1.76355303022373	1.80766378909914	1.16088814814873	2.60443558096684	2.12540811256734	2.86229550985271	2.89737697304445	1.8111263066008	1.35286937891619	1.4425613792286	0.600732099042378	0.36820645631277	0.285888193277547	0.0562133120004833	3.74111383566346	3.53011160189939	0.451497754865195	1.11721752322403	1.97308073799651	1.02296805373757	-0.221752819157363	0.88393086695129	1.8795774932731	3.31925258854013	1.57326400026334	1.06136985416341	2.11347483685265	2.00977422678592
TCAF2	66	1.78050298198395	2.44125612374217e-13	1.97634829696528e-11	1.4132834482387	1.39890553245297	2.77585819873796	3.0801959648546	2.52274714333407	1.26818739509956	1.25471700144004	2.84957569802271	0.745395524066396	2.19323496024281	1.65076101298016	0.642942390466699	1.22085511812607	0.962266136442833	1.70224007012325	3.81418630250521	1.59334515952418	2.30515792515333	4.68645667559684	3.44045864384168	2.28097813948055	1.38229490699783	1.47494552114147	2.49320884190355	7.28612686137066	6.05875669345123	5.76801696375474	2.64462378689021	2.32510591956245	1.80254641087869	1.96641685887382	4.80934092509645	4.04167050916406	-0.00297346985123554	0.992178238088875	1.61907997510382	0.571046085264015	0.653885439968478	2.76517680917849	1.55962901123695	1.34744670214377	0.865260302904768	1.01425814356691	2.1392799723755	3.5902344438972
SPRY1	67	1.6729498026038	1.33973621762222e-13	1.19349513169864e-11	3.24165736881146	-0.133167196919614	4.86292913710827	0.231468961304723	1.84691596043394	0.429318104427666	0.828597089592487	1.61681729471709	0.26245349218652	-0.510630164705969	1.54931845888465	1.51100563245099	1.13848659626836	0.698661095447655	0.385344652124435	0.0903236793089203	1.39272941247047	4.12268889310282	4.42705935133561	0.346070563461441	0.0832209706094272	0.00620667618596363	4.74268469805192	2.8905956684058	4.45801236411643	3.29219963599194	3.55104022151413	0.78649724921125	-0.0208207331052757	0.577837432910811	-0.161893537203019	3.18603151875779	3.64937596619444	0.142406434984274	-0.365260071287638	1.85780444544615	0.530813010693249	1.30729430028266	0.47369987832392	0.895093434814772	4.71928177796038	1.4742940234587	1.91154317330425	2.05222606654974	0.958299704971172
HILPDA	70	1.64739695210551	2.28309305601144e-11	9.10855578569169e-10	3.66618522381739	0.309665373652483	2.09309844520357	3.41842427085312	1.17272630561251	0.854263813014673	0.350866150172731	3.32819481708969	5.32623084134968	0.734774860042468	2.94837346139604	2.28326792176947	2.21091712198994	1.98797930126527	1.43650574967013	2.62127922070242	0.442720477497865	2.2181578777746	1.05824083444878	1.63491980182632	0.936422677173659	1.38529833370577	3.57314952685353	4.07639396353115	2.39923324615029	0.979481994503797	1.31304480724974	0.667615679784366	0.5997006311967	0.774508802594422	0.646136575843507	2.44333984432449	2.20205362614369	0.107312410442357	0.110180033711799	0.810177560454755	1.51865593831219	0.188472376828833	1.02177314595837	2.32875034928286	3.19328752725738	0.562141981783317	0.645820110883269	2.15023576367858	2.37922585601548
RNASE4	63	1.64731627936397	5.15560455414816e-14	5.44579143905307e-12	2.10316984071952	0.967352398349115	2.89150600048517	1.19695251785493	0.705615128065262	1.71741716967035	1.73382171953263	1.90073562713345	2.96195732696144	1.82942859055872	0.958209107002368	0.483624416792249	1.00441624225649	0.407932209008389	0.195563856591159	1.49681998746522	-0.420812366048146	1.58348677768009	1.3026843916689	0.724942229086544	2.16842825944537	0.944002575088506	5.15775879764519	3.30447328880377	4.17416950674316	2.90973277245727	3.30236302781298	0.373476854934529	0.147969116976049	0.876419900779927	-0.524254781430694	4.26794719005574	4.06138016635058	NA	0.888578080247545	0.595853446390011	0.149276875638627	0.3651512686077	1.36921904261626	2.07035719147516	3.24638948781988	0.368777175468474	0.293791546688462	0.800039330265933	0.595225726084329
KDM3A	70	1.64552253600536	9.96455421219973e-26	4.42067483070029e-22	3.01891306573859	1.813808925025	1.30306539647063	1.88120457621571	1.93626720657392	0.966678443219575	1.51989754707397	0.415509051979066	3.29115459070484	1.21823330635737	1.32612105355599	2.23163105464313	2.02246661608014	1.3589186681904	1.070165656539	1.22627032217912	1.79456301903949	1.49441616466765	1.74489312788268	1.74693335730668	2.23977744414767	1.83179607087065	2.35545373652105	2.26805023459448	2.12519653942033	1.83034791659181	1.84155890994371	1.56013054137543	1.11028332892254	1.32824671068022	0.863527164522557	2.54104402561152	2.2837963108434	1.41989290265826	1.52501341047079	2.04643231999952	0.781168285395341	1.68938964074702	2.36285945491131	1.13653182779868	2.81622052689254	1.24675981924543	1.35919038678293	2.68462219382153	0.841508496075032
PLOD2	69	1.63879823860193	4.68440831127939e-17	1.48442207372571e-14	2.42683427333123	1.79182760377255	1.95500127158066	2.202029162561	5.67401254019284	1.28164789834957	1.87800401431291	1.52614676670895	3.25753735149611	0.96892862425146	1.94297461947636	2.5454096315592	2.6673069954931	0.883310305445545	0.40164734946183	1.85107668837589	1.20539626228603	1.72107404329893	0.883950351764584	2.23223606771328	1.60118186155968	2.17977630899144	1.81788044390887	2.14055918152961	2.32944777476341	2.05515493607208	1.79433584657368	0.817852763203541	1.38922323639191	1.74194065652073	0.90240083315313	1.83410209602406	1.57019416541244	1.40329732473082	5.63934611758506	1.09544144405156	0.641410668680726	1.10477904650185	-0.268542393080228	1.4002176971025	3.02450812777397	0.274257339753982	0.392760171258778	1.28327345009374	1.49657862499951
ARRDC3	69	1.62274944175789	1.23328044369839e-18	7.19911231634676e-16	3.5961270830937	0.647266929593965	1.73635646593978	2.1469934362679	-0.191500134799735	2.17537969805181	2.63642945077071	1.9994378435954	2.577027081689	1.65991903856594	0.842913485909721	0.693198547291437	0.59956572812269	1.70331064959255	0.326932379679631	1.06958809558969	2.68874811783368	0.597544044165019	1.95681079381407	-0.0746010613980891	2.40589747572883	2.09220995328582	0.262257461198887	2.95161220750376	1.16243097889212	0.0514122357322316	0.809427358900358	0.519048040481983	0.534544991984228	0.566776179112266	-0.356470114679642	2.06791284880696	2.19779845938116	-0.00704586587914618	1.33863124430457	2.60843505202872	1.28107067488906	0.659170052200978	1.79495410658567	1.13785839357085	2.1457276448687	1.62615101070352	0.898957663489682	1.93410019696282	2.37075793965451
VLDLR	64	1.61049222684254	8.9279718061096e-19	5.50111862786453e-16	3.02939519341124	1.01592238167586	4.05920408950239	2.80469944408872	2.17650351092844	2.16698717195608	2.25091724735311	1.04242747421487	0.965545727414529	1.62498237697465	1.88974204668432	0.947707182947745	0.83490242986964	0.160905808829385	0.905801927727658	0.0494061760944517	1.29567258675581	3.21181496366535	2.25843862494093	1.98626776260912	1.98974979129821	1.68817394494277	0.660589792175461	1.8060346314958	0.966561243800002	1.32837435629267	0.933205473336804	0.889759772607364	1.10157314267507	1.29095898236875	-0.363186333280403	1.14032657339608	0.953070872817621	0.23217285334833	NA	1.8593297697692	0.0175970525674979	0.0377521004522507	-0.249360545334972	0.580204992194499	1.66000671037372	1.37465501665015	1.25829475061769	3.11023545209207	0.915027352621974
VEGFA	69	1.60737596725439	3.40120986780094e-16	8.02613162633622e-14	-3.87480730604334	-0.49980767787934	2.09799858560169	0.429012686966403	1.19424771616718	1.9021479937347	2.48592843715452	3.78777459776554	3.1214783422882	1.21557100443861	2.18433749642895	2.106223505701	2.20325681268938	1.82832358518911	1.5318511416003	0.725309191217728	1.22406790119498	1.72438706818694	0.659531655875955	1.5586244519528	1.58724652591238	2.20733691081269	2.57048693954691	1.85394216304169	2.17716432967078	1.55993602934576	1.78722291003569	6.83261412435355	6.43753876595554	6.98766465695461	1.42600673228508	3.07443650667763	3.47000422748604	1.90535698273197	1.01962763633852	1.60080307574223	1.02467874558855	-0.883702357430843	0.61308524188508	1.02305932110259	0.773853517811822	1.58185321244812	0.417167789558926	4.32122536200691	2.73669215930646
ZNF395	70	1.57406632669827	5.28446191751576e-22	5.86099671271673e-19	1.2345872775053	-0.0358547633664566	1.83082274689143	1.58223953723494	1.48537100255522	1.39793319477098	0.854955718718963	1.87867248025334	2.97459555214394	0.565974569869085	2.62494762149316	1.45412483652558	1.33961465192082	2.02250989347907	1.81322068812764	2.69124909494299	1.6717939344366	2.18379864594627	1.55890415408228	2.80186882590468	1.27876963933277	0.899004606944838	2.54997551130186	2.51758794938728	1.35440304936003	1.07030320835477	1.09634773165761	0.678490784126236	0.192944969248584	0.525679247192365	0.13715685529208	1.86657534372885	1.86932592328765	0.849211117749445	0.812274091979153	1.79352243852024	1.155193665053	0.400394931286777	0.52319463744225	1.42563521287348	3.01906263518103	1.11390257763409	1.25095179850214	2.25842206197221	3.00093917469853
ERRFI1	67	1.56312782682196	2.92021556707492e-14	3.46396907533989e-12	2.67759944724488	1.81393709056663	2.07614205634489	2.73471837181641	1.30991882803566	1.46931877512749	2.17391076311582	0.12486560487489	0.980857088214873	2.43752206729532	1.01470164997064	0.726969809540254	1.03781420075927	0.770445389158004	0.411677797702878	0.670721468636368	1.54352202265149	0.179951849373473	1.47049600151009	1.47277462513336	1.08811971565369	1.69157967611853	1.01204582823567	4.7058583347617	-0.755741158026635	-0.302328314894587	-0.727043359100103	-0.824495810788094	0.115633386905804	0.0529862671483972	0.797965017735029	1.0436965121983	0.763695489627294	-0.0288907958931005	0.988663121774839	1.85245315279718	0.547032391211729	0.834763825929902	3.14343460313187	1.25921440404453	2.50335589597217	0.329889598484595	0.325704894080597	0.763108394915949	0.0352668620154909
INSIG2	70	1.5616516180795	1.01012017607649e-13	9.41448980912969e-12	3.6789279847688	1.01760827255586	1.54734335809454	2.89258063005927	2.83224647583566	0.599335895976887	1.20112110882999	2.77636729275191	3.47486925411017	1.5062056218391	1.58049225963785	1.84620323716996	1.76934329257961	1.23969238568808	1.10624770828883	0.958469616110724	0.692901183931875	2.2998128764007	1.97379566920289	1.52429333093761	2.22104960317139	1.90299807260673	3.52654147744486	3.9311702499907	3.03871052172686	2.18869364217757	2.12527878285561	1.67007495468501	1.44707072621926	1.69679898951387	0.516934226532452	1.43228432143955	1.80946949032253	0.565754187051459	0.468488053020387	1.09825730462602	0.681123790469219	0.349187609560728	1.92184433912907	1.18018705595775	3.54662197384584	0.332799344058825	0.484247905189995	1.15228096167599	1.31306038056711
CCNG2	69	1.55424691636192	8.02941861597616e-19	5.08881610684524e-16	2.65564973548097	0.763137474476661	1.42615869863792	2.40602938553742	1.12404371850467	0.787177050254195	0.991688146135521	1.78447693605019	2.40178152385528	0.880817301695423	1.51187467715754	0.596337651330538	0.451771100653499	1.62587817320965	0.367837803598822	0.546261637787425	0.953660991787222	1.54831272427935	1.44191366035003	1.31579696194728	1.48280314890508	1.2423146624349	2.10072001657403	3.48863684708884	2.84169580526345	2.4714415286434	2.24320120977351	1.60270507308345	0.907010403566463	1.46195014290191	0.107759847081616	3.7165501334003	3.569064693081	0.495142047693258	1.0704996529584	1.39386171164544	1.60076307653371	0.655337831577733	2.72270611001081	2.04163655449069	3.50788713843575	1.17718685683104	0.644437097516822	2.22416901128412	1.84538698815499
FAM13A	66	1.5359785239163	1.95471901391003e-13	1.64865312420351e-11	0.0242047995529823	0.666581882541364	0.429409489455516	1.48253375937941	1.09477799076476	2.19056345214364	2.81045824795188	1.05954739281889	2.89943040330349	0.91113420272166	1.92541537103623	0.639376614878198	0.816487356743055	1.17219971383457	0.834807165658807	1.61973587050336	2.51919244714893	0.688346472338621	0.0489623413630276	3.57579130246909	0.00435589689214707	1.69121074860052	6.35343917802963	2.56147915909075	1.56831281185823	0.684867826969069	0.714000753908529	0.673251508914864	0.41923159404548	0.472132836084818	-0.390143569665578	2.80294021292951	2.92684837211075	-0.0281247956255393	1.14456690389232	2.47191472179361	0.74646996851757	0.348125625569037	-0.932408090995385	1.65032743169515	3.00070919327129	0.357962761864365	0.522136634145781	2.88825718265916	2.54755826164675
FAM162A	70	1.51830591459991	1.80115486772527e-15	3.41480489537452e-13	2.47492931825452	1.40637629156028	2.41698043967489	2.39636709570053	1.87197138769574	1.75852849552344	0.808099228397535	2.42696166819742	4.07638896749034	1.38027517560667	2.51488882137262	2.21363099831129	2.4050142551144	0.654967966727273	0.636048076167959	1.82091918441457	0.585647479270463	2.61450348087284	1.84763601000191	2.00916996173979	1.77277031070468	2.21199193055797	2.85699536728288	2.35107051780095	2.90340589901262	2.48704488697242	2.17656284253503	1.35360477232444	1.38078037749099	1.14250252652607	0.244516968423721	2.88489265451587	2.57131589666476	1.38652663915293	0.273329178082001	1.27040895659427	0.121091527368318	-0.336458387252179	1.07867686241251	1.59163161511507	2.06028162233976	1.03905084285786	0.63509260172422	0.336868231494379	1.57911727960459
LOXL2	67	1.49569431964939	2.52409398367709e-10	6.98994416303687e-09	3.51882536342466	0.444806870921471	1.62967459968617	0.772957714530395	-0.985790833065378	0.499932393140642	0.408104767664162	2.92512431451773	2.12897206716845	0.625910453980253	2.77633345235625	0.896710013230247	1.45701724856758	0.126454320567433	0.242892026822745	3.24778965277315	0.502212702648876	1.60457025733899	1.16943535502408	3.07906979231953	1.87757547000886	3.21907153910038	6.46197377521766	3.43855753296776	0.126832531900758	0.159021452696647	0.682648324262324	1.39016055284053	1.58967653011715	2.12439118521637	0.38253709316102	0.862155048347399	1.49185647087018	1.06994200916674	0.940123937599308	0.241325639553632	0.263231553901536	0.570119639052473	0.348137616989656	1.57592915384224	2.75518036156949	0.124352243059235	0.121806475393309	1.94133980241575	0.649061046624944
FUT11	66	1.44558411097374	3.73093359037468e-13	2.78651747143741e-11	3.43551523588208	1.35562984842257	1.87016334655305	2.30273496945389	2.83825490356268	0.757519232644867	0.672506378792896	0.614789931017362	3.49125835808693	0.876409439475014	-0.466902682311504	2.13906202472479	1.81215486470884	1.20763797198098	0.620429743307556	0.887929313755644	0.95260172126381	2.10361798851331	1.97159191025634	1.98612555389235	2.11093867165883	1.00235687905774	3.68025814908284	2.95688853584556	0.824251877933638	0.435743257593213	0.355307829685597	0.939752492490773	0.7801731905279	1.1781203885926	1.13562844104664	2.35619960175004	1.71501725141486	0.530598503057186	1.29012431113026	1.34019317910195	0.873562940520488	1.17948070569929	1.35018499530447	1.23534488452867	3.94790456554783	0.310727222166674	0.566050956701036	1.76257338517487	0.995279566629314
LRP1	68	1.39036919277746	5.34760866997345e-13	3.7538182125744e-11	2.63341137395408	0.706936432702044	1.63418696025963	1.85149482627645	1.98503037341343	0.982764390659545	1.28480834659236	1.08026078181671	1.02607952487316	0.773818693020981	-0.52097894112343	0.552084941818537	0.351877601124758	0.0793602550228896	0.0727943051066719	0.62942748863654	0.663744289437153	1.07034487850832	1.06362648010266	0.539915847522125	2.37144684852582	1.14279577026007	5.1759233253816	2.29957294069409	0.98609359546007	0.526517719047799	0.71966771316352	-0.381858234111018	-0.308739477896428	-0.134743164909183	0.946817610318219	0.88845682673585	1.27900638986822	0.582213402817876	1.56429908379245	0.0243922013565132	0.149846570085329	0.819066779120027	2.47875367906832	2.27794464539257	4.74059715104256	-0.0745063788800382	-0.248163952582745	3.10550380240943	1.15894272493243
EGLN1	70	1.38017739798687	4.10189918534727e-25	1.29983325327676e-21	1.90011639936099	1.28682801416196	1.3159920935325	1.75958979702057	2.04301749114932	1.25541289272414	1.93641640055186	0.841613465304089	3.24600482297095	0.651858211224055	1.23964274079811	1.74054165467801	1.66877257161347	1.60062231489522	1.1550887657778	1.19738602682271	1.7583828037425	2.31970475595311	1.09685897770522	1.4166852949509	1.27087823151334	-0.319704309679058	1.78838481949764	1.77218025243715	2.15481034267232	1.80113749666334	1.63953226400726	1.48336974198846	1.06886668936749	1.21435624732602	0.572293352855667	1.58856341594727	1.28832265174214	1.11426581971555	1.07775316890392	1.67358525949177	0.995644493992594	0.835510171722082	1.11345588035262	0.22720952002776	1.54518746535487	0.893203243568489	0.93846559634621	1.62883394105185	0.979385551426463
PGK1	70	1.37987865570255	1.53975097765709e-14	2.03302120157081e-12	2.35833494386445	1.5812235748612	2.22043942449378	1.98143393212963	2.24872635325121	0.97246642818528	-0.54917205020715	2.26981878674691	3.14613070915453	1.45803462745349	1.57048708824391	1.74971445029063	1.91507443911237	0.464038116287968	0.425956301333459	2.36911454719138	0.512420332247111	2.02316780407665	1.84677851554631	2.15133274398732	1.74345967124303	2.50381036539713	3.0947667436562	2.24888802274185	2.44911603219038	2.42398668274855	2.17339970152087	0.884106448729206	1.09305867415003	1.19788114797686	0.483867586838057	2.61012984774696	2.32924949450457	1.03792178211981	1.59385087580103	0.906660562599997	0.173176317721978	0.454845720175434	1.80653266498982	1.84698768533083	2.52242414129389	0.614169870555833	0.293061352015777	1.24300526404181	1.75931089620059
ERO1A	70	1.37581448188064	4.19015160461063e-21	3.87274762056137e-18	2.25100848423208	0.642849513413033	1.56497202866048	1.84460250561917	2.2534936894814	0.999006487274418	1.82240905922	2.66960752868469	4.19770658880875	1.08748181550172	1.60232754841887	1.56350843085323	1.68261307690705	1.33104043907265	0.341817588454568	1.15414637416347	0.882972398652248	1.48712248894928	0.90930720975778	1.70355627349657	1.75265161137108	1.19739267052837	2.92134902208338	2.610413884926	1.89242593877267	1.41172490909024	1.2128908909924	0.826719697659804	0.679104370277544	0.811463098031473	0.191382447887068	1.55203067338275	1.10867848236136	0.0890479683787867	0.934301397748348	1.25744243067651	0.865460668523514	0.43591958705716	1.04469426985215	1.17759220580346	2.53075840300912	0.458773811578177	0.488412031003211	2.01460682354007	1.62531922151353
AMPD3	63	1.36529589559452	4.55230489293329e-12	2.32671030265083e-10	1.42628425481712	0.368437365086845	1.44104585816956	1.15874906193004	2.02173608686113	1.62359793135015	0.639637588182577	1.5535494302861	2.61700027351766	1.32241440158947	1.52461300931699	1.47841950876295	2.68572627634046	0.404911247365213	0.0239220063038902	0.442268237320393	0.50970061550546	0.499811711591953	0.377240886999795	0.611450164570348	1.27155937484058	1.4971227311325	3.44660246138225	3.65230093158904	4.29242253970635	3.44888753663569	3.48391338435311	2.46558279508164	1.98243157457425	2.00911374067817	0.421422188729058	5.7165215146206	5.06088744625539	0.617132188680231	0.294013438351001	0.630457156136787	0.54328297373699	0.4415414630188	1.48056702889677	1.17311245311196	2.54651279550056	2.24616012330569	0.932584931061183	2.69254543648008	2.4633304223438
C8orf58	68	1.35493338825399	6.55384607356085e-18	2.96688599191279e-15	2.46141534188445	0.596659669833988	1.30869029987644	1.93589986890642	1.23167108873027	1.48533906791541	0.943275815124924	1.68592735409567	2.41332189745338	0.596903379244522	3.32796299560732	-0.091002741464389	0.00608044321223901	1.35502031590672	0.0310112425854693	0.927698665828326	0.349412340301776	1.32941309559507	0.762297280686796	2.32593969833342	1.55568462669194	2.27273801398704	3.66780006915522	1.74893957712375	1.42160405260058	0.948559576351514	0.991887722818461	0.67044064361014	0.372965452788759	0.581369686161052	1.17425654520185	1.79341668987409	1.8842579168171	0.859283484746382	1.63970126772531	1.05055894408748	0.801656993148714	2.52409508278703	1.21519904827266	1.19854690557597	2.35378701766602	0.237367788061741	0.169262063436116	1.64688345239419	2.10171488168222
RAB20	64	1.34736636662899	1.52709578029231e-12	9.05722957177648e-11	0.724255770827435	0.841235803937057	1.87605106852282	0.922332867471351	0.652834791131191	1.32382470215696	-0.508348217377289	2.16984200867501	5.08439704642526	0.876273972024731	3.18803455631783	3.16081258146912	2.79572117693406	2.89796802864928	2.15761919619267	2.72200902317611	0.84217990880552	2.1071353222207	1.43877272523419	1.40943576464566	1.03318036995338	1.44919485201793	1.18068417220466	1.47257357200172	1.58423705896025	0.719118206918556	1.05337447266281	1.43377654126198	0.36274046590901	1.01516529298438	0.422725405864921	3.93069681512801	3.90319984052555	1.30545264738453	0.513628482097857	1.54272297078777	1.86640791724013	2.41124429963822	0.891101420890975	1.10999775580825	1.33451684352792	1.49090386374226	1.58066781025439	0.328241164299147	1.79175285462686
KCTD11	66	1.33010996494787	3.32006716314326e-14	3.86981204702073e-12	2.2595431093326	1.22696361702559	2.41121335320683	1.81896918506518	1.05296852952362	0.709649157052948	0.276054162118103	-0.125752698441962	1.55816408771903	1.22533703209027	1.76869658584041	0.810238493048033	0.753983598036507	0.715378554095316	0.892995693339594	0.329808261190794	0.335089279416819	2.21182764865063	1.4287082784799	2.87179557616126	2.23017868426105	1.38422226764606	1.84003525218967	3.19766217241216	2.09244880242154	1.19502606323141	1.50898182646068	0.756939933318855	0.0662175236787476	0.135546525205153	1.01194665251093	3.34184732737732	2.71486590309964	0.0414343085799993	1.30657553371424	0.242984456707355	0.313348728750905	0.679371517037246	1.62874708809448	2.09885013396386	1.61339404007408	0.373207487684898	0.275319349599735	1.46721804064248	1.65728415376323
C4orf3	70	1.32866955617617	2.24829969818741e-19	1.51126617894525e-16	2.72468431810418	1.55317133121101	2.0494429735913	2.08546084735308	1.70257636039412	1.33037182101841	1.1726310111057	1.68905782696901	1.76155468276068	1.09755191961093	0.495403255035868	0.956423063181778	1.02373243377218	0.500709622899879	0.411060943090567	1.39097806959548	0.638834568705632	2.00046442704398	1.47882265210927	1.58324769898056	1.94104196399973	1.65170121725771	2.5093800388474	2.3952661402463	2.4349828174665	2.51720967845995	2.09765295792852	1.26771103258728	1.20923940810055	1.4044660210616	0.976850225844226	2.67179633362688	2.54396757059292	0.365819242866514	1.47846049424392	1.38782094216217	0.132958677662096	0.100346790199143	1.40036056367157	1.56479116214334	2.73924736665328	1.01211506505804	0.485188171114452	0.683977109127703	0.601518458171169
ISG20	63	1.3236143015054	1.10788169106531e-12	6.8454127217857e-11	2.12869671363145	0.696699280039498	0.741523242964011	1.61113645017116	0.0346129607554532	1.50264789374331	0.710227570019374	3.97364731899903	1.22342214991566	2.00472551726742	-0.517656934686001	0.0679807582316972	0.658876041245528	0.264736584928263	0.625284598920331	0.980269957712661	0.0684208961171517	1.32157091141798	2.0277883021016	0.316303440767155	2.38109354786705	0.453293657257799	0.833622538309128	2.93078032371718	1.50584030707256	0.690814255228247	0.959039647782749	0.302215813248102	0.0762169764095182	0.296047557026627	0.575092034381759	4.49281425860496	4.63490682123312	0.724005571725954	0.317334195546589	0.783899238759535	0.72028460000582	0.530919674677909	1.58061277189127	0.43889788793928	1.3648505657314	1.418602408037	0.434838516667406	2.21207758901545	-0.143864673266687
LDHA	70	1.3185117696135	7.91794053226277e-20	5.8545252295551e-17	1.79385710637594	1.65595667754241	1.70015942040912	1.68668454072114	1.97855217307996	1.32214131930698	0.743071583641733	1.29678352451654	3.35133892390001	0.819447574375864	2.70865747255014	1.57118281499961	1.39628986087261	0.958190295463268	0.41233963666779	2.98864241802968	0.93312999399769	1.64373517900606	1.46422824779	1.76816442489568	1.15315125100293	1.43819036391391	3.29030993449286	1.66978006927085	1.64939169161965	1.73355979545532	1.46265335372322	1.26298522519233	1.48329776951129	1.42243923731772	1.17600258421978	2.52435928190161	2.30020050180278	1.23698962792734	1.42213672243755	1.4665943545792	0.311919417952791	0.893317752696505	0.604878368333767	1.3743648142359	1.19298970721539	1.506203509741	0.930247948990726	1.63256128414437	1.49924009724964
ANKZF1	70	1.30528433833398	1.91207610314005e-19	1.3254272537454e-16	1.86188512484234	1.21749897682031	1.70201714452451	2.23635594774663	1.76967191465237	1.17159298040882	0.769680890568295	0.444856455207245	2.69079069427694	1.38591234952452	2.13498140880539	1.16220521132908	0.994352908450521	0.831771724067054	0.633962065469729	0.525904912097102	1.41233854890309	2.4154754431339	1.48739600090707	2.07873906941772	1.07962252952896	1.39740263488866	2.30355444184824	2.91055906524788	2.79471184442796	1.82686799395648	2.0156404684446	1.08437153959714	0.445898248435657	0.660678101800272	0.380618654143509	2.0229476352457	2.07261779402738	0.936131678664484	1.21336154060682	1.25110212907447	0.357500830294737	0.0167352523108127	1.43054693084416	1.02618496368388	2.80920804262597	0.735942469816516	0.781020610610939	1.04675671423523	1.86611497631814
PFKFB3	70	1.29440074839	8.3442614206784e-14	8.08263785299075e-12	1.24943488917244	1.55743607626615	0.37400664733256	2.3640712497202	2.91313508916461	0.831833766166957	0.50994878130941	0.763846919010057	3.96978659017042	1.16726445647006	2.12557651688835	2.5303761803839	2.55148051926138	2.38697117732965	1.28494821950586	1.93619287260671	1.81555680142405	1.28548768670459	1.71311171791282	3.88880601905736	1.9262345829385	1.22866103827671	3.487436253674	0.942779512023052	1.71019233069886	1.61789563097524	1.5293848720266	0.961572619379169	0.694991177728383	0.813431399852164	0.372938247721299	1.68771021388066	1.85122922514336	1.3401414302869	0.826032009377327	1.69975315545129	1.77173854144258	0.486114718678387	1.10137475520926	0.592300464928501	-0.0677912989770103	0.852004749840556	1.17187514382763	1.15462933756406	1.89716733000596
P4HA2	70	1.2816722007767	5.16177117239167e-16	1.15654957723224e-13	1.72912835323151	1.57041087726439	2.04985241515368	1.0792363851024	1.51613941031201	1.43566039054183	0.881649397742135	1.95097153872262	2.38468508440401	1.26910497728262	-0.148986650609452	1.51507288827179	1.44517397548676	0.341533427622314	0.161900018236322	-0.200110261782592	0.999453800233345	1.99346928074681	1.53967843483914	1.53067134403454	1.48111983476025	1.61265447987379	2.88200510967135	2.4946264771199	2.44825626194882	2.02724583250669	2.05385639583853	0.427719384339534	0.433593699626017	0.439288225455062	-0.152918747974068	2.01918482212538	2.02019944932978	1.34542273832343	0.481994542911035	0.918770903630705	0.248101733500442	0.804531758722161	1.66703944026708	1.38298596829647	3.82493245632901	0.317996463072905	0.0211389546661182	0.821145546735719	1.57468413949457
ARFGEF3	65	1.24386517490402	1.88229944272022e-08	2.89550390002913e-07	2.83091492242166	-0.212178259729989	2.09307614659616	0.549660535664215	0.45017304204662	0.423683745949621	0.749776299972788	2.56698271722819	3.73756546690438	1.20500533830756	-1.11310859174108	0.544076035702389	0.578259571614143	0.780488740101623	1.14332145954985	2.88307173051467	0.344775088174998	2.20478063590218	1.70306730598754	1.62549970584857	1.11605664635632	0.979069763087045	1.89262303537731	3.46845597203244	1.48000710690264	0.70033195325024	1.04682534064824	0.0958067432687613	0.26604198828096	0.774282249577842	-0.621307409873497	-0.619031378145178	-1.87796702565741	0.246758296131379	1.64225490701119	0.412292766278277	0.575717899131487	0.0116601871013953	0.584902020522416	2.05371373212656	5.40338172717634	0.124099159740839	0.257450331673114	1.28867440436189	1.56503286271627
STC2	63	1.21062444840962	9.52321568636983e-11	3.09288389978119e-09	2.54866577824362	-0.327405684554102	2.00648227127515	1.89763559664478	0.776770482176178	1.15396355169288	1.38835828050302	2.05769642519545	3.82257665847026	0.491620483606551	1.23401072794435	2.94166357253807	2.51258495711342	1.55000752979226	0.869717422011406	0.809884450468515	1.42081041326786	1.67323894014565	2.12451974309783	1.33240052116925	2.00051888690867	3.43461522960493	1.46636527478824	1.44134546195751	1.01423803116745	0.170367436503662	-0.0445545451297979	0.251292665657537	0.503046633366617	1.10022306042269	0.533604986105512	-2.33535486342157	-2.53110113736984	1.06868270476533	-0.770725716169604	1.86515455323607	1.06145072403471	-0.694143240581273	-0.834965361795062	-0.0132286053217543	0.497381414526448	0.0354422038614705	0.566727321933865	-0.0640696570883293	0.813838935752526
MAFF	70	1.20648373117453	1.34643480822712e-11	5.86770469864324e-10	2.27194308519535	0.354456013051723	0.301875868154199	0.632093854336719	1.87408318106175	0.81505817326399	0.577545927254523	4.22594246237638	2.81071097915535	1.46277807387325	3.84066040504508	1.48714164821987	1.46306698195177	1.38037159461437	0.373749020426286	0.459144901835015	-0.263903141299484	1.60015364553051	1.37324170853018	0.980653818723106	0.822446633053174	1.05402667464262	2.28854646890835	3.94639852785235	1.93735447510921	1.4451585057234	1.24059987490114	0.350048023018331	0.550030760331643	0.71261988287017	0.364039183098353	0.0705088660017952	-0.167631028714691	0.627407865079898	0.334196022232974	-0.050223412419666	0.785153097701069	1.01909965798134	1.0093403359717	0.483138892856921	3.05596158775804	-0.209694408138138	-0.00785241884606687	1.76488111242455	1.49644357568611
RNF122	64	1.19484769739559	2.58907704128876e-13	2.08082996122707e-11	1.83316680434015	1.87903145713863	2.74853925013316	1.08462694744313	1.49602950861456	0.560229210721827	-0.142217378134266	1.52666744902606	0.500242762406109	0.908384796797194	1.58124728680559	0.471454750982043	0.384853172977507	0.395800917570285	1.48415867175479	2.13488119918675	1.05976683291159	2.27544852851253	1.4126393013393	0.76162183777731	1.69003396728922	0.620260564274083	1.90622171298467	1.54911073785345	2.38146347904895	1.78582418177322	1.96396607629063	1.72249693951868	0.517280710515587	1.024212863823	0.41988518929398	2.20751311755464	2.21017855729982	0.0604216955877906	1.58341694510323	1.37540146864922	0.255777945231838	2.06682358690226	1.29365799864667	0.713336200977098	2.91471914281836	0.395716423071053	0.391172171806467	1.53995909209971	2.19390250372549
GBE1	70	1.17293070010196	5.81061279674648e-14	6.02294453539395e-12	2.23048656773827	1.11228781130871	1.67380160738126	1.89861465459895	1.5666391034172	0.813326905778878	1.05234850565385	2.1791013915101	2.19636121396579	0.975860402203414	1.10701082820531	1.81383258842609	2.27279796706424	0.268097373008433	0.171955086281244	0.665818266896079	0.395902057483952	1.62201602600079	1.12567635012893	2.43589981031966	1.38831790742993	1.26907726999287	2.41272559870597	2.36356385318045	2.82983744907684	2.34243456020908	1.8295317897	1.19908116456122	1.597904449198	1.53017963986493	0.687976111018491	1.52997516825839	1.44748483215689	0.790441940144395	0.536139679333372	0.399225869545428	0.11180609542185	0.496330836723401	1.12639764836135	1.34430401649444	2.00364932873648	0.05369429380695	-0.00524156135713828	1.40873748763976	1.86873836337244
SLC6A6	70	1.1567297090954	1.92049780583964e-10	5.59061447888909e-09	2.27551078659561	0.0117254467807368	0.365961124222421	1.46298894883256	3.96957578205756	2.23186877131468	2.04022560822624	4.12899535408657	1.20156851532738	0.777137617072761	1.52626454070689	-0.121736184184193	0.131043639944328	-0.276829964006224	0.220008692961031	0.521089856672492	1.2996725250103	0.0854916757042283	0.891533397441266	0.331568045820589	1.04993810321927	1.35992393985363	1.75651003113069	3.86091976576774	1.35485607822774	0.651975976221207	0.585322990568035	0.0387416440105169	0.398315724109692	0.88284961296305	0.644739865338923	2.35130204469007	2.82502733491206	-0.242280401207022	0.0594079536542248	0.27737960089555	0.277602474580808	1.28983339863841	0.0139809052475898	1.23012691259909	0.950248374832669	0.676524957217537	0.624714783122795	0.651857194125564	0.163124094533526
SLC16A3	69	1.14981131552521	1.54333763802103e-16	4.27928943582281e-14	0.791508953472617	0.998130998730032	0.858415276125516	1.743592162796	1.3474395667776	1.0941148318463	0.531200633868329	3.14094043935045	3.1065493680004	0.73208901014913	2.32055111126326	2.03184435091599	1.82431742263187	0.564016789932221	0.516478929973707	1.91398225809058	0.284142960735027	1.70113937946092	1.15003051903559	1.474490769823	0.413943696631013	2.21474047738003	0.0978078049882714	1.4794159763956	0.140617748359527	-0.305765025657098	0.589699042367706	1.5843872026299	1.30574499998272	1.4509991961745	0.189013307559625	0.324765263738134	0.125937797133223	5.71694077591467	1.83790716251966	1.70517416635976	0.155304649025497	2.45167924852335	0.646749576439519	1.29001969006311	1.31299006202474	1.06912422749761	0.873133510067212	1.71108371428228	0.399134387623111
PPP1R3B	70	1.14661806897193	5.39573063400201e-15	8.54914978024518e-13	2.8159827701983	0.508775776119064	1.39881547012026	1.53118791738429	0.614801994000033	0.524871544944092	0.907715890399976	1.25578441353981	1.45656334067226	1.05845684328034	1.58740010881628	0.318779769616362	0.734626243468667	2.33960767583157	0.628425140162448	0.0135470127754386	0.374355951771741	1.68584674407964	1.11706653214805	0.564343065350436	1.77614323124938	1.10705896909531	1.14318710630085	3.38507312198037	0.312952340086152	0.42230387458413	0.387241412572574	0.371159368095234	0.31889834513035	0.026443069322999	-0.111505759560948	0.35197800929499	0.39215386927689	0.311566441408014	1.31903236876654	0.799336976660591	1.83711326741157	0.723740560346097	1.74553929151503	0.748118609906173	2.01738321970852	0.289529824312921	0.260721225759096	-0.164272919838531	1.01389502121667
DUSP1	67	1.14095352443939	1.54115627669669e-11	6.56159856615852e-10	3.28486775744104	1.02200378974308	0.632885787553869	2.08141042861258	1.18885024012322	1.38285134552914	0.856007590113989	3.57854128190172	0.232582272864821	2.84273285465724	-0.300084531001051	0.34776150095185	0.228772074072357	1.59666350355705	0.267108913531563	1.2180420471407	0.680418292047925	0.275070461473625	1.06478679973403	0.881954037785562	0.892500757959789	1.43128341601385	0.975968279819895	3.53323410031596	0.615670968396333	0.290866058477319	-0.213172510301487	0.152561030587403	0.163449830416278	0.648598976394976	0.970182516807347	-1.0055734005704	-1.35135866427558	0.197137705164739	0.607964443802638	0.637843901194742	1.22659506813675	3.80019856886243	1.51751549903459	0.157093203711592	1.63869902478297	0.146796952391484	0.112062921289894	0.467055795033668	0.621736689509356
PGM1	69	1.14023508891294	1.65955958871645e-18	9.07374397906564e-16	0.859782022862303	0.996775636840516	1.16144697545736	1.36419822915621	1.13737044049302	2.47490218825811	1.57219864777705	1.06896172285615	1.8693407316229	0.60133761213075	1.32865309848912	0.899867795584779	0.506888243168009	0.192801180377614	0.582443323921949	0.758163039178726	1.52987793751913	1.54027582612261	2.2167071892802	1.33776871685603	0.572642696061495	0.609148886525505	4.34487527195136	0.723029653519556	0.357026452428444	0.588238674668438	0.0490936170694591	0.708333287280648	0.866669651179678	0.617726105967638	0.48460730365963	2.78513309822383	2.5050612067596	1.12849747223713	0.682518886907778	2.36200897136027	-0.0532787041834376	2.1470258018249	0.413773935111092	0.737520535526273	1.42900434669483	2.02323268625411	1.18108521404463	0.133984858680232	1.26141950603576
FOS	63	1.13540190344214	1.75741249039498e-06	1.51331226172133e-05	1.37047882280671	0.517839169301659	-0.305043189288477	-0.401325240359673	1.9128395837746	-0.417565885827391	-1.48891651203518	0.98643483619872	2.29800638319023	2.89216723402911	0.53286508498114	1.11684564978095	1.19298758661282	2.40593387039492	0.538773720822096	0.170838804730592	4.06854512159963	0.280443314495422	1.56550647918819	1.56374528945309	2.93440658643965	0.647335454933261	0.151288574382241	4.42118871890777	1.48986242276815	0.743479208804619	0.366566640555888	-0.18005313717457	-0.0218374208586106	0.400575155417317	0.489220531851001	2.03290391436532	2.18139360169761	0.514330994234623	1.87013582934735	-0.64709166578347	2.44084918010204	-0.430934530471765	-0.592491584515967	0.810149322635196	1.62166875369287	-0.11860437006056	-0.0757395216507297	3.79381091418391	1.50001308244799
PNRC1	68	1.12412738432776	1.31930370208997e-14	1.79538617912636e-12	2.26128623015715	1.1677541870888	0.826361412710596	1.82155975216253	0.876716351327666	0.765004982689746	0.366007789635312	1.19294641132912	1.52214929257419	0.930613286665367	1.33159485198953	0.756720011820975	0.864635863570621	0.319918510804707	0.441333978123513	0.421999971885415	0.391579735169627	0.541042093871358	0.837997799331695	1.16850839864461	1.84384478637654	0.234392997712455	2.29223800744195	2.09339339866555	2.55883535362782	1.83952893146721	1.92951644900912	1.09836805646391	0.825927813179722	0.851375297607918	0.861601721744743	4.57305594362078	4.33249673803775	0.895939922993922	0.755103771380329	1.16496185848575	0.0391997049124322	1.40578551448927	1.89244555616512	0.799981307003815	2.09663319315575	0.903607832135822	0.70865046295779	1.7076860239865	0.469486211817248
SEMA4B	68	1.10618273419659	1.36550476107528e-15	2.70443094733678e-13	3.33018236971204	0.83359285620347	0.904781096905993	2.35685589007038	0.542184940600038	1.7194269526367	1.08204370275814	1.92744282756374	1.51740351586216	1.24401442587746	0.290197785144059	-0.240371853123678	-0.269557955172224	0.297725024597529	0.55646486929347	1.61358137080404	1.50257090345665	0.696783856950962	0.352770044093216	1.14433579114974	1.1017095824064	0.432085141283528	1.63540148885765	2.23545704137297	1.1753015486117	0.0203623879274955	0.771026399454697	-0.0923608278078972	-0.246392441367894	-0.157323968610524	0.0355990657601788	2.61179339979968	2.75098630112061	0.0339393577067175	0.962690278440372	0.703662195385056	0.249209909501447	0.79721513128657	1.95791294088991	1.6968483821123	2.38963081833188	0.379906216718782	0.44088319899922	1.71126813274061	2.13043667874358
NFIL3	68	1.09902972652091	6.82681076593401e-21	5.82431986192108e-18	2.02673168678252	0.665841802002753	1.43184686775201	1.83620582030167	0.326739704200458	1.32944615931849	1.26587890095349	3.38386021164871	2.81671815770239	1.62197499257775	-0.0215651018214723	1.13974995079969	0.702858396945278	2.21894806731036	0.295303669623841	0.150975076040711	0.716746677506574	0.880825691013969	1.09684718807347	0.478931968325125	1.22419227062445	0.497032111408553	1.14109523646987	2.51025340344631	1.62503230596405	0.718716877959724	0.825012853916451	0.207975038950871	0.530276422523774	0.833488124352951	0.488947920185291	0.939630242194902	0.73961165639799	0.36859428434254	0.868867141748904	0.905512991227264	1.40357968328885	0.358548855892954	1.80381472295729	0.132289161629474	2.5159272181218	0.462324658287604	0.554157124224307	1.87248041587021	1.44821286890448
ALDOA	70	1.09328600328679	1.40962852718854e-22	1.83931647000566e-19	2.62105322676272	1.18830647600671	1.20358193501206	1.15866313078917	1.53450021661776	1.07650797799527	0.266738429923882	2.25703565281614	2.80375323099704	0.87514993429185	2.18235172954195	1.29118853244492	1.50933679997756	0.259544124377028	0.17939835334761	1.44568421327453	0.472192662401574	1.30792110050814	0.962731094987421	1.54080122771508	0.471194051469771	1.41620814260211	3.01126543125894	1.42239090035329	1.08320283005152	0.814144167899967	0.749816873882046	0.17234990721998	0.646670159314874	0.604219661461378	0.372540507233437	1.4983062629225	1.02136361378485	0.87259145671849	1.72653367204861	0.902944577611018	-0.0524623273753043	0.49128619635681	1.30978515176556	0.945352509159619	1.14530272223788	0.842619793668313	0.380200329772226	1.46742878775297	0.778691223954331
WSB1	70	1.07009569639659	2.95133043126087e-15	5.15483556112037e-13	1.8336389589973	0.401221028528681	1.00980065963396	1.21174966133646	1.00654449673297	0.496117531245224	1.96171777557793	1.16815920627003	3.05455325891242	0.88137933100068	1.02409946799618	1.05348954681748	1.33259667253146	0.877675331006696	0.479255100950838	1.1558132454982	0.244995986616482	1.25076823160108	0.850059842242958	1.02870026704758	1.00044755105459	1.24838639702466	2.46542516259673	2.01521910920456	1.1876165200381	1.11495711571875	0.589979524501772	0.988946729620175	0.448909159672956	0.620500836130036	-0.0985036823350854	1.47424044640128	1.40625257733653	0.214183920386751	0.473974323213545	0.826024433425563	0.760108365753005	0.387192719487808	1.89643068792166	0.766964081775719	1.98202766073072	0.761343876182711	0.562078791350529	2.30198441813633	0.440174461490442
IER3	68	1.05573811019156	1.40505583966133e-09	3.00839272542159e-08	1.39438580108549	0.563773062163349	1.2983992136978	-0.0985663846003545	-0.865514671513526	1.37513838207011	0.746401824714415	5.33852461968443	0.0969501072892963	0.922764836648723	3.5145933926276	0.697321252895042	0.303190624911973	0.541469923081744	0.149204427680572	0.149758536108369	0.0745751796208418	0.533179134038312	1.1824309354468	0.806035337521606	0.704327730970654	1.06727317182028	1.55951901135063	5.98526389655415	2.03881618984881	0.616492643280315	0.987217929299505	-0.840243274197345	-0.975421053863826	-0.518072856643928	0.053345734239263	0.953983677757525	0.965697457202433	-0.0697648425539781	0.633211141557895	0.196428033432249	0.228802582851353	-0.590917223174424	0.5230784752709	0.110841710700407	2.43215441258016	0.563609786387784	0.181057797504395	0.291753218478693	0.347766757794914
PPP2R5B	68	1.05218509683792	1.20008569326395e-10	3.7231189997176e-09	2.25560003723105	1.15452142386997	0.971304959430092	1.17736438183189	1.07518351536944	0.49358966257264	-0.140447480561979	1.3523717840293	2.07397517979928	0.823367790600787	1.57939413990916	0.942185008632016	0.793263719886451	0.511823834140876	0.396242856421625	0.575299246346062	0.323719015015977	1.98087559774266	0.867160263186469	0.826368286632799	1.66055572838421	1.05244118470582	1.95638317611352	3.41305310288244	1.4864740846881	0.574103167754031	0.911905223681041	-0.119889574765467	-0.293558396737762	-0.386719270313923	0.792254678113893	1.79875240170788	1.81957349470304	0.0729350840258787	0.999336014387881	0.572943659963469	0.420081668348743	0.974204502346362	2.29506628829471	0.880367382852191	5.19978225591691	-0.16363913347127	0.065112608260135	0.751531762415247	0.176735462712041
PPP1R13L	66	1.0453829448757	8.53999323579086e-18	3.6429640376214e-15	2.30084016494498	0.726166918640183	-0.00266412088658187	1.09193882124993	0.802174354040846	1.3108935746868	1.42136896189265	0.68286225531132	2.47937961225987	1.14698536441274	2.67481493362609	0.879508261173884	0.973576340156898	0.493417264364462	-0.0267160860536011	2.35828534668803	0.936369220887602	0.82640350297602	0.721876269804795	1.63566400512638	0.674324097462645	0.902348087101783	1.74351976546747	1.20877666160816	1.97900365195388	1.40655545604705	1.68371959617345	-0.962749749163959	-1.22342275257525	-1.77963980825907	1.0239113068505	-0.757424206099606	-0.584878250243114	-0.139256801562528	1.29476958155638	0.735159929282557	0.228098374838243	0.215457400762414	1.7892056790917	1.42572133705219	-0.215027987695081	0.275646268436685	0.127275632388849	0.197719339983246	0.654810799635693
TNIP1	70	1.04084748195932	1.3867570921927e-25	5.12684096983641e-22	1.89603493939388	0.858523079887827	0.487111864348138	0.548074124610157	0.943967607559635	1.4035388981628	0.578297635403632	1.69373154529845	2.34368330721023	0.854975863114109	1.36975002853169	1.756520864604	1.5296960522244	0.411597243803425	0.1709505800081	0.660316589725205	0.700367456876411	1.37001708729339	1.13831757077639	1.22962774069706	1.15603985691204	1.15512200657059	2.13492215570324	1.79278825061333	1.60513084551362	1.26913058197641	0.916387293365327	1.18926330097562	0.965025383875296	0.700030445155051	0.359089015674839	1.28687602696817	1.74507106178326	1.48529949831841	0.77381839448822	0.719177225754764	0.21376579397339	1.25337194444091	1.12993846534204	0.904622265330726	2.34075668217008	0.868000199906557	0.55629709520795	1.2928337411295	0.666963297296239
ZNF292	69	1.0308619970588	3.24520742345756e-23	5.90988780742642e-20	1.59719607342519	0.425326447869224	0.84220769456776	0.892838759269974	1.51263524850511	0.599591533770828	1.72991681711774	0.208739579927742	2.13942359724819	0.6479155394956	0.232372212693741	0.962686632820746	0.850922166412979	1.48895859842346	0.590070013163157	0.443200474182334	1.27470320747611	1.2627852513118	0.789112023191055	1.16044010369533	0.916980843388952	1.16692298323666	2.26442437193716	2.7029152006658	1.28645813322447	0.852613202198605	1.0020668244917	0.662082323184311	0.671834148431365	0.827560446534097	0.673223556521809	1.80320320633449	1.59716143428641	0.732763757344725	0.765755833013359	1.08877480008629	1.13974900671184	0.739331683375162	1.09502779440361	0.663176940097252	2.14758117942874	0.873683953922481	0.941798440751114	1.33505219265776	0.876160626680735
KDM7A	68	1.02067770212156	2.286665589044e-15	4.12380618668082e-13	1.04220622323548	0.23949675189456	0.294951541099957	0.41894704819244	1.11393181544736	0.303497971745671	1.43381756994144	1.17664975880657	1.4093402212212	1.9866510898638	-0.852499292883286	1.77371492648138	1.51976391533269	1.36130603962024	1.10168865577992	-0.198987714899809	0.918441758323971	0.933803638471239	0.851771481676617	1.01408460794531	1.73465834925135	1.64608620991145	1.29757807783845	2.72659074444598	1.52877378910347	0.681179346261282	1.10525864996446	1.18372342201871	-0.103889141164283	0.601465643697608	1.22197105559577	3.6987464438335	4.10252183998948	0.5901286236136	-0.0999463883664304	0.636051565892373	1.04751090787887	0.444223767346619	1.47037319814222	0.680238796497885	2.19048511300494	0.639285335243157	0.386038333104479	0.0139861986868462	-0.267648500163421
BTG1	70	1.00862532137632	2.7621365039886e-17	1.03846969375382e-14	2.11615690749107	0.57972702052661	1.04305780949024	1.93027736555522	1.68645967468926	0.346744960661357	0.370784495339923	1.25228479716521	2.11192271486296	1.23413961748929	-0.216734919324357	1.07489037914882	1.23949482569738	1.09385230911121	0.229981576378139	0.551707848265185	1.11908119521796	0.647682048923266	1.01729336540998	0.90616550001599	1.3349393700562	0.497295755674559	1.48990954807837	1.96273743006651	1.33681445072819	0.906057861785638	1.01918048715442	0.320643893196053	0.308061843860748	0.325121960116983	0.115257795913918	1.18803561678902	1.12925630822958	0.331722846357724	0.724415675736821	0.932033691795387	0.742633945983986	0.4211023037747	1.23641920732911	1.10936030834278	2.99464466263042	0.667577479401252	0.271722577357395	0.551100633282735	1.57710048365662
TNS1	66	1.00467162403644	1.91714578905309e-09	3.91945879196088e-08	0.0618024891918283	0.0971889428743711	0.667440714142201	1.02338952475816	1.75218557421756	1.3786290481724	1.22879483316808	0.943611671096827	0.157479270776061	0.202514271909983	0.422990805795658	0.760610745636209	0.534858313713114	0.270697795889124	0.324420426640885	0.739933112985652	1.23816959384123	0.261272506221603	-0.0302639673077276	4.99945251518571	0.958024523571751	2.25365041814129	-1.10884775409198	0.604330323208505	4.95490101645949	4.97744162248033	5.09147908285851	1.42471059583647	1.25450302176182	1.5056014587526	-0.634646363123654	1.44281904233751	2.09987379871094	0.213913368595795	3.61205343242872	1.28007206797758	0.295007521562866	0.811029949210246	0.178502206137544	2.32217084268338	-2.11557457669899	0.27732774669488	0.16740796021112	0.874010764419053	1.18742736472651
YPEL1	66	0.993227611553727	3.06695190716654e-09	5.94677685356366e-08	1.39940092280898	-0.030111440479466	0.534068434133627	0.348820776641334	0.66669266883722	1.42564133059407	0.642806452869502	-0.261873623438178	0.534149659283292	0.455505703121295	0.267325366672557	-0.22839421343771	-0.0529994915559902	0.0732043422011898	0.687760936985092	2.19842740999411	0.239039309601947	-0.19967287927833	2.2592909240261	0.623474926882819	1.26889826303373	0.99087007630808	0.340495692290019	0.197803514986661	1.90221449948664	1.77713896965933	1.80169281996825	-0.437985564410492	-0.217009941433633	0.371584666694264	-1.58676348300644	-0.570830335396219	-1.01204806212314	0.0605830580776958	0.589587926031095	0.426366003279526	-0.0584016839933997	-0.243994170103837	2.9685888934886	1.89090713670815	4.15735098520135	1.8825207129442	0.867173761725961	2.16842956982053	1.05310986649817
KDM4B	70	0.968229503114348	1.86078049156903e-21	1.87617422109019e-18	2.43766833086457	0.525931963953697	0.919201842815812	1.18780393251828	1.65939630960899	0.807047784874003	0.327478079425216	0.902167710296195	1.69657792506186	0.893411622652408	1.50578402477645	1.16162788176311	0.983116497445047	0.753208024502795	0.748723847097494	1.04304311578101	1.10044894507957	1.24070740329847	1.54106850452337	1.46001180152524	1.00082221016714	0.900796971767269	0.926157375053355	1.42606269875656	1.56614824057286	1.09675587906794	1.2469172221746	0.970101632919547	0.123014964576465	0.321209613793581	0.180477897898438	1.68247541678828	1.48758220764426	0.590602679246528	1.56346016553071	0.999281080518063	0.540662080419547	0.915373977253529	0.974349572757353	1.05097902432633	1.90830043112097	0.655416193145538	0.735192611973075	-0.676560714451733	1.06364865053015
EFNA1	63	0.959594265923452	1.06540727556122e-09	2.34453017723205e-08	-0.324398199539602	0.0320051580313519	-0.54560606308542	-0.256819210737213	0.332574564913953	0.865341657756711	0.219851850979986	0.66804906291889	1.15616097228825	0.600466379396454	0.945304894755478	0.161250666055359	-0.288540736404091	0.280490307391673	2.40496729124083	1.55457438981659	1.7357831274988	0.845904246807704	0.862190194331636	0.772237643141687	-0.12395565621586	1.32739443127642	0.692799808159981	3.24768556876356	1.18296611709882	0.29095350439652	0.438735400708337	0.459320963533226	0.256736085438544	0.362548625872188	0.281467737609138	3.74579905793839	4.02268754755177	-0.182040718556438	1.54941888305391	1.46793183943417	-0.0557829462317448	0.100558522026602	0.435129560336341	0.251341301884821	1.79555862975239	0.92461836121215	0.556069121758789	0.89172520102884	1.0639402652044
JUN	69	0.958598896901753	1.81172120684832e-13	1.54391662147377e-11	1.66227967010739	0.613107352445458	1.94343712382528	1.19694056706542	0.527219830312482	0.369728401559218	0.223801490349068	1.44128092927333	1.01194579190518	1.28932068909544	0.387830470517551	1.12545390089605	0.575319069170919	1.3090633502002	0.184212571950029	1.2627687768337	0.526998154455345	1.16987659731154	0.441996044830989	1.0673594856389	1.86455418249842	2.0235571678294	1.59628422705433	3.63253118116472	2.78104348350549	1.50582568715336	1.467565623689	0.413140123874711	1.27107169316022	1.97643988516543	0.835816800266902	-1.60932474005552	-1.44705935664493	0.268855525579265	0.485293721451625	0.690080670606573	1.41997925260955	1.8397276545159	-0.16803287971575	0.922530882412067	1.82070669118448	0.224834202052176	0.142601539730563	1.82558457529982	1.07326179546132
GPI	70	0.95427376851242	7.48915239775348e-12	3.57720123379147e-10	3.17846345485031	0.8412434737586	1.10168424890245	1.57691346483405	1.44446735159213	0.906933174943207	0.00729812015677987	1.2190335389325	3.23058900860095	0.577653550503698	1.50728170165839	1.43721954127297	1.62080685504247	0.137380350982891	0.194018833588196	1.13580523271519	0.573918156181821	1.60147048489778	0.715218942490854	1.03811740574048	0.829694656918814	1.46374038723655	2.94777437001581	1.63461173991619	0.905707570558233	0.730280817044615	0.675240174717566	0.24488357501961	0.414349768422838	0.360662911080177	0.07259408921266	1.11855517152478	0.938521619293237	0.649932967485136	1.10684242263311	0.744151585528121	-0.156844686772713	0.494818391396253	0.711454851034926	0.822332431757622	1.33598925162049	0.848380035943587	0.463042102924935	0.385491494172475	0.981923077478426
WDR54	70	0.951412789025721	5.31875115359055e-19	3.47001582614545e-16	1.5758558789266	0.58986789096045	1.16859549786191	1.33423288154962	0.298065252905868	1.29310096910861	0.319569233573938	1.61161228974578	2.47897119816625	0.772629727996164	1.40833386958412	0.680356557929036	0.673226829827163	0.311039953240669	0.205765998105861	1.70341081973789	0.503467367098626	1.31244519369247	0.890710127378151	3.45678358803767	1.03677101470077	0.841285385017817	1.45815075771717	1.76708234311697	1.74784057734022	1.37478801093652	1.35062939770813	0.429197567135194	0.8290053394477	0.814016950160309	-0.368701947509572	1.64462634618806	1.31614582438721	0.593234378290959	1.25094103247907	0.594972508361921	-0.160445443125808	0.341084764556817	1.11577497942351	0.797311631488383	2.41332485361002	0.779705950007169	0.358317444163268	-0.0716439068970432	0.678893883205088
RNF24	70	0.948678640489036	4.5838878613977e-15	7.53183707714992e-13	2.48873171782035	0.6152469182556	1.09939685697162	1.64199625699709	2.02167581409374	0.503995009732725	0.582646194389316	0.661556466099172	1.31730884369276	0.918226133719614	0.0724159016567214	0.274937943956857	0.348839304576644	0.941203452779924	0.419502761213907	0.255954342157331	0.559592160540727	0.792394932353081	1.76381226042874	2.00686366283568	1.8160748113951	1.41745464414447	1.87226755182273	1.58196349218529	1.89778377984821	1.3555518669089	1.42881632576062	0.89598410764207	0.720286018628611	0.758033736126537	-0.152997623398979	1.30110992565618	0.964575387425716	0.348378014365865	1.45883660405143	0.789463414185871	0.67613161496201	0.0614811735654985	1.5990081868933	0.913515995450262	2.4358134456143	0.328693387659793	0.398161758961438	0.954661784903793	1.40964803659897
SNX33	70	0.945031198795805	5.33745239812538e-13	3.7538182125744e-11	2.01029080033244	0.452287376728026	0.714087906976188	1.42796193824968	0.43236406735992	0.966159500409689	0.759866569171684	0.514246104745401	0.719826358926505	0.663005663672608	1.57190753591229	0.444581165472725	0.58113401360282	0.782168279507427	0.131595312567698	0.34142245566804	1.811358659208	0.728102295861944	0.868200274195755	0.526957338891908	1.26506415343873	1.02712653293861	-0.131556248741415	2.90468515425301	0.845845596352844	0.30665521351749	0.371423493616853	-0.366651443223639	-0.560575026885653	-0.575649192901385	-0.119124967284721	0.620650595073883	0.520699014337059	-0.220548793946504	0.554028512869135	1.48563969673975	0.70936826438558	0.446839065150902	1.40029681416106	1.18552165358575	2.18775955245586	0.360077110326171	0.315398525892938	-0.0144726138574241	2.44138571950991
PAM	69	0.941333395029159	7.66159240518517e-15	1.14060028679072e-12	0.958637764598771	1.18251935757327	1.64814215233053	1.41888789221895	-0.532008714557162	0.851601928107455	1.16477686597145	0.717959481574531	-0.227350314618605	0.894882793632432	0.0241690786021996	0.799367576853124	0.900678105777352	-0.162685254790275	0.0754440799169356	1.08254604315597	0.160001167225679	1.29312052709522	1.0476713238336	1.77209714351131	1.15794887582518	2.1059449798952	2.61757650720078	1.75057924544937	1.74124324719578	1.7160064524188	1.59106800919411	0.0460835091882245	0.304211234393843	0.47970263908923	0.3014491665472	1.3361360592517	1.33143183147423	0.468995246648195	0.363846272168594	0.436511002696864	-0.214188066548865	-0.0328284183061548	0.826081308519987	1.49690393295893	2.54036976565275	0.234772279119322	0.0515225704837388	1.19608432765646	0.227140028000251
CREBRF	68	0.938890881849524	6.31242741847364e-13	4.3620643301116e-11	1.63795991542345	-0.171776997990007	0.372069822619709	0.206990895580192	0.594714361240646	0.625536999140959	1.3716156922455	1.20822730519231	2.42434798366321	1.12133990504723	0.0491694218945117	0.440821179586788	0.460633489949769	1.38196934484915	-0.27401658907213	-0.211269619822455	0.383996244933485	0.199899517025588	0.569368815749814	0.00789647855583855	1.01551380497195	1.45612211807168	1.67871330637984	2.45096144885104	1.87696853252503	1.73218658422923	1.98283663878105	0.550463063841537	0.0624377579755357	0.296481775910365	-0.33624692414973	2.40157821209603	2.48836886879815	-0.0997058117925631	0.485007167908976	1.04306868724176	0.933666154629157	0.168244093632262	1.497200715394	0.738731556436882	3.07611484839066	1.02120049762668	0.635811685660237	2.24513602631386	0.79439025106707
ORAI3	70	0.931042207624337	1.01323730106867e-11	4.63415047676398e-10	0.794276143366235	0.672220442125275	1.7206576473925	0.267324406067083	-0.251107038511623	1.05703344075538	0.391003142014309	0.506377784565137	0.331578298055418	0.626146925550357	0.961064524891561	0.384975880393877	-0.0567832436525296	-0.0326951355547862	-0.00838340390532299	-0.488312490950632	0.0919050868015723	1.75631151437281	2.27260789968873	0.630031864148982	1.46831391254882	0.992710837393503	0.847123478053658	3.06923208516395	2.69069887783306	1.92352387249417	2.42381317351923	0.735030787645285	0.512964129352287	0.504159395714498	0.107954261609708	3.88662299410104	3.90459708555597	0.531971694567741	0.934707937634378	0.847618092871695	-0.254130748179228	0.184013996595385	2.12848274074656	0.989584054463813	1.95633324781343	1.21586296673829	0.505472183256559	0.433056821722017	1.02068961036605
TMEM158	66	0.926951624503185	6.70607580279247e-09	1.1834063123114e-07	3.49456967060895	0.954220078737827	1.42945599385107	2.07290495523692	-0.325971703788756	1.80188111614254	2.26677805549964	1.0118094219916	0.523952039421577	1.02372739892529	0.229457467410686	-1.22974997462206	-1.28534870123722	0.322077030896352	-0.180429189357788	2.24272020011276	0.598585706829708	0.117393237829588	0.525005961399534	0.267365219529221	1.92367424224521	1.15636512418035	-2.23405217125974	3.29448573220834	0.638771687361096	0.616704922220017	0.867073811991231	0.0437484074992777	-0.06780893446794	0.0516472639664922	1.26372811512845	1.7121075356924	1.32315349819367	0.187322118261136	1.13252253828342	1.35661136211494	0.125191617534416	0.373870816152343	0.90500173804035	1.54946874937561	1.35850621351463	0.91857419385725	0.586075883327703	0.87686899610233	1.72565764744302
GPRC5A	68	0.918251437829312	1.21195084453009e-05	8.35150470126327e-05	3.66973006154134	0.216201722052785	0.519379488481749	1.22040931391551	-1.08802693361879	0.110339090851504	0.106323432633662	6.13118512215129	1.03825395950885	0.256573991707667	1.94369433867902	0.251868548515995	1.50405728456579	0.742065839012017	-0.678587319549475	0.951503884349733	0.698621738440319	0.911940086189907	0.647478342541883	0.542983568331882	1.51043558344977	0.354848837974589	0.540719089906128	4.84448697999832	1.07791513400147	-0.58636061429872	0.342269524151881	-0.101637732653874	0.00641447559380248	0.152990631430994	-0.0208639743780522	-0.852863399304725	-1.15825882988468	1.20940625125407	0.227014260379246	0.477112685558643	0.816506208404087	-0.0799591824490084	2.54964477361359	0.778541100402251	2.26670238932181	0.257462324959523	0.108465267818003	1.69825497745473	0.796532828680807
ZNF160	67	0.917053434290559	2.29091507490723e-18	1.18179251608354e-15	1.37221312910698	0.882399937761221	1.02286563979057	1.22625544562334	0.698797109783726	0.436883187518983	1.43764236858897	1.17722034050898	2.01210806942981	0.824364882029745	0.773733635424468	0.798181682808784	0.740049563721944	0.456573245954626	0.56950675873924	0.394297694916621	0.352054897668204	0.923634171028602	1.02211204402002	0.797350197471955	-0.783276097014425	1.15803935256233	1.52495407928506	1.2073906283145	1.87795253688994	1.41319516775789	1.39498550676211	1.26084706695079	0.81180651345316	0.81612099745771	-0.0633736182058815	1.03642470317915	0.700795979467813	0.853151984441261	0.752231728473262	0.675867581251231	0.282508122237697	0.945812549172348	1.52163017222732	0.18821000315685	2.04068240583952	0.796957026361409	0.696499264156724	1.30392833391985	0.880654670134193
TBC1D3L	64	0.910448981583773	3.03932771214639e-10	8.15216049707754e-09	1.92695791011025	0.0484331541201911	0.507616760205472	0.789843296268932	-0.162224671791831	0.639207723632198	1.54237281892671	-0.200474120591125	1.72468028446805	1.26867830238708	1.51368681923701	0.447942368030736	0.0358907141540978	-0.283606690506281	4.5116522699059	0.968750202885355	1.89447689813945	0.626620622122027	0.594312320376655	-1.12738972635852	-1.18513171678137	1.08530973381222	5.05917450534645	2.01716437572487	0.435782464680466	-0.0287806741879812	0.0887218495538845	0.0708929068762736	0.116565937315627	0.24626076800049	-0.690742464119388	0.479590172486374	0.721802684055506	1.41670288519447	1.18719748619422	0.279270528033991	-0.0453982598154785	-0.254130885246354	2.8645569044241	0.525690520991998	1.21486124638234	0.156169012386561	-0.0478772339844166	1.29796940321199	0.66198552766817
TPI1	70	0.90988880792439	2.61404604281261e-20	1.9994748041955e-17	0.806810951186203	0.713790738580416	1.46352190062873	1.19277287406022	1.06076587421077	1.30994221765131	0.214817713036087	1.69361985721619	2.01823482192517	0.637402413691393	2.43370831519952	1.12254079934917	0.941965561784578	0.379381666368736	0.418307688832665	2.399931152711	0.622214521182378	1.6803553407321	0.565330029321438	1.26140617344546	0.65225881530274	1.20917312938575	1.68050378913274	1.39070834848095	1.15494632356332	1.18707805750248	0.957792391717408	0.697569944570623	0.87927538394643	0.813812282279286	-0.0405407632373635	0.777720714553107	0.517314677708373	0.805735064096385	0.734721628796261	0.99524269592697	0.0610529919747071	-0.123633837435678	-0.0821372772825613	0.781915162908727	1.51791033651798	1.10146150150271	0.496435859173206	0.221707878901065	1.17330510078317
TNFAIP3	67	0.904026102482991	1.55308076341291e-10	4.66176420758121e-09	0.734565771337758	0.680630387919154	0.156752593874847	0.746806653261089	-0.281842934537887	1.04723485983016	1.03530167490042	1.43306398226372	1.37075519996413	1.73466247057558	-0.574829649222448	1.11853277959531	1.21296287841525	1.66275011648831	0.301921792620211	0.466953836407113	1.4596872997539	0.352482139499743	0.584535347383512	0.75467853896865	1.10353743498593	-0.367078007716139	1.95580475651201	2.0864749839149	1.55124546200258	0.47377454978568	0.510247091370227	0.151134523281321	-0.213226883309078	0.392309591664943	1.2910846356241	1.74329767802372	0.58145273202645	0.785267032366534	0.330288617577936	0.933755654529726	1.17156738046997	-0.0985278306799805	1.01622653394713	-0.384540250968101	1.59881482677991	0.292752366514352	0.0553508544641577	2.52380111271687	-0.284479896921004
GOLGA8A	69	0.902044248056448	3.70502780324634e-14	4.2582863591508e-12	1.53598039264775	-0.596071901312951	1.21692885711546	1.67498648145053	1.44123113543138	0.630932309366271	2.36153306860553	0.545165960159411	1.93425332851097	-0.0517038462382623	1.28319678129332	1.30755932611719	1.55976017494463	0.409069431546643	0.695520907587443	1.48950535760373	1.07081460675331	1.95463904340274	1.02885832054207	1.04871884130241	0.54003998560972	0.494200375503823	0.580360304812627	2.26186987740793	1.17802194089785	1.13442403860001	1.20227946832916	0.634738784519778	0.717251945469985	0.935533418726787	-0.248661001490171	-0.276575273028342	0.945674622743045	0.848983922243644	0.787466316140127	0.520225509064974	0.219587586169741	0.247400875454719	0.784101335055292	-0.338776126307149	0.342647042623367	0.99867694118283	0.442057615780616	1.33912668023098	0.175829088488097
DOK3	64	0.897317039610442	3.58648540684767e-06	2.8534942358212e-05	-0.325729178683293	0.355262423473868	2.40394676511052	1.74983056971882	2.30114625980277	-0.0596113959224089	0.245173253924763	-2.7832962025574	2.78604976440087	1.27061944504501	1.63230796257	1.53906936746497	2.26563704437378	0.893594142047175	0.577716550304401	0.786805096052437	0.552194111785999	2.10768324200009	1.10438604741092	2.56390640995694	1.72777637625107	0.458980011069888	0.789520275834116	1.88745332991986	1.24887800017202	1.0219893559041	0.931574999896678	4.02764587226756	2.76960191669334	2.61738385688541	-0.315949100536732	1.05825154944557	0.122719234702641	0.54949580534357	0.471469555389443	0.284056279816235	0.864845414887635	1.03570955718204	-0.325739297603139	-0.202540827599943	-1.11952610532086	0.177639248352651	0.487825617562379	-0.384498660323343	0.801591240264157
PFKP	70	0.896260479998989	3.7493021361088e-14	4.28695979294667e-12	1.53476410431192	0.392129366166084	0.841462175829002	1.47645291269981	1.99908128879687	0.906580659742016	0.33076312410884	1.14433392759785	2.01042935981133	0.542918962857031	3.23098098482423	1.57676311273529	1.66580437407075	0.282724996966196	0.283212061593235	2.1887473986189	-0.0145126865598323	1.67014589182974	0.833962995305537	1.25190980651626	0.826895199122545	1.18746811753176	2.98668842530168	1.58709012561625	1.92787310316649	1.45338638379401	1.46478440578802	0.655521780906841	0.683243130394671	0.827484569806587	0.280292510197715	0.264968352261337	0.148141434479744	0.395570373028146	0.443103117571272	0.338258027616281	0.0107825834938659	0.103930487893472	-0.177281953457007	0.718987473924622	1.14125394738561	0.111688725372065	0.177098037793054	1.30799683758583	1.17673602855565
PLEKHA2	70	0.891722191724016	2.7773480341063e-14	3.33011535635383e-12	1.69335348493596	0.337961636253146	0.0865312928991873	1.41678993244155	1.31632632788513	1.26281064274375	1.23675645637913	0.0621213968438232	2.3202878237219	0.33986270564631	0.780124648569607	1.00107348761014	1.18594246235232	0.882492014799821	0.327051605650153	1.04344600744417	0.20677381193428	0.417365210679956	1.29528002419789	2.48711687082439	1.43543292433695	1.57249578204413	1.72952505492495	0.7428756517243	1.33844909908072	0.852215203543017	0.884767606959169	0.802727629957196	0.483842606528159	0.595412524132236	0.108487459424961	0.843689201048001	0.93127970340013	0.933391450913659	0.0582114396292659	0.599026763555806	0.399773219114836	0.935054943970963	1.10648840809521	0.754046807171347	2.45005192933284	0.93186380833091	0.748406151093965	0.926956189565549	1.50884485877191
JUNB	70	0.887381398481661	2.27341520415767e-12	1.29304861688783e-10	1.86066772055604	0.31838660917792	0.288482191133031	-0.699831399856188	0.891508056872177	1.10613812058948	0.47494903458786	0.296027325578749	0.820259845887457	1.52951886418127	1.07555692835737	0.550194736094991	0.727624164971018	1.03801215091095	0.21440319576638	0.555723838646607	0.504322889912593	0.658851282866195	0.118528096791158	0.217781087674603	0.824569073314847	0.440539281211169	1.03634160982601	2.67267938675037	1.70131005263123	0.576648716271954	0.796759467113384	-0.244549123694669	-0.474595842623903	-0.260015780911012	0.741883799391829	2.59670052673515	2.7208141278417	-0.0777925910069468	1.08372850205352	0.409818897959861	1.02732835182175	2.40046638809329	-0.141090677309334	0.816384955656253	1.13202003465085	-0.0528552552571819	-0.0940815245280356	1.55327718954299	0.629527801489203
GYS1	70	0.883091162868376	2.18607130076304e-10	6.20889034488166e-09	1.49317796303536	0.573588616587137	1.69052310331515	0.833179138850156	0.655670569450776	0.57130603432836	-0.403912597444665	0.954468350403534	2.06352603171915	1.03992926349903	2.77423442583102	1.84973183584631	1.86558210565881	0.44388967267016	0.58607430405936	1.83717593596862	0.491805197379177	2.08615424579288	0.86470920439774	2.24662697373666	0.941692490320936	1.28392068714714	1.55780261038986	1.37819445696474	1.18420969716052	0.837328706781271	0.727270641546509	0.321052564334594	0.341001012943008	-0.00311694919275334	0.394616100670156	1.24921150929524	0.990915329496338	0.183664951546275	0.488073070290312	0.357378222675519	0.20751040711422	0.467134232522216	0.333007887388521	0.805709925897182	1.8432004978625	0.15055541895382	0.232684323918035	0.292485786630583	1.28690745961337
KLHL24	69	0.874109595698501	1.25635995458983e-11	5.56259012229774e-10	1.73448733614219	0.0142385866481361	-0.312819427962529	0.621138734294291	0.88841465939985	0.678405630326746	0.937386396454689	0.591926905487915	1.56624731206278	0.380459373502601	-0.233751084830386	0.173421186518479	0.163883886761569	1.02686628996884	-0.0151619931578777	-0.384996673520249	0.568330679155228	0.147657784091742	1.12362403932559	0.194872165043875	0.744168075979968	1.07444481972097	1.64577670420508	2.08828241341833	2.60147353021941	2.0183007239442	1.86570826442036	0.539074240008869	0.286743359827575	0.407437205295324	-0.300319834147796	2.88630678157794	2.48105967354045	0.209208688208991	0.207707153299857	0.832409697560582	0.58875397410226	1.17865880104069	2.01998438243845	0.802130234228738	3.24129440453664	1.14915588477719	0.63402835215197	2.06205889311191	0.619057580365853
FOSL2	69	0.871173067001808	1.30181976847825e-12	7.80458543361745e-11	2.75756580967805	0.222926051467756	0.790451742486373	0.371767361859918	1.17963505796693	0.493807096787753	0.535633825008279	1.98742890539074	1.99087220720498	0.609748088017969	0.156161678838023	1.96658931337092	2.12456698502532	1.20946022450537	0.673010048395214	1.55609060854297	0.934489664763857	0.954653751441804	0.780833189593511	1.56496282415723	1.75511046307166	0.585798506728548	1.12630832690989	2.10296631547505	1.85024545132061	0.955137623846625	1.22147336521775	0.093747403436308	-0.154215589348026	0.0919726136961872	0.171293791129445	-0.52445706296634	-0.810024881622403	0.281611839803775	0.950479046259355	0.917243405437314	1.20078897808637	0.747398707979746	2.33601375019745	-0.435603220509638	1.25123670613743	0.313845696877007	0.258935083688358	0.95065804098351	0.936721908087738
PAG1	67	0.865247092759656	3.55905733673135e-09	6.74184541788001e-08	2.8735820770501	0.287547205835465	1.11581169364004	0.672504892139876	0.668538668969285	0.190387594470343	1.81327988535109	0.314132092795247	1.03900198666108	0.914264964379421	1.27048661332403	-0.336939028443882	-0.368475271168814	1.05383883804873	-0.477512169286109	0.322578501668607	0.338407964041454	0.668890938021852	1.11514400645085	-0.0174871940155043	1.38559413202282	1.38612787005267	0.849577305115949	2.4683444128086	-0.607983133358892	-0.469027866953752	-0.616925913617929	-0.182463971296619	-0.222500575404755	-0.129279581093352	0.882229553431434	0.332831378491993	-0.0138015350552707	-0.327981318164821	2.02306778102887	0.51759387058275	0.668263725045188	0.600951060836054	1.80320470683481	0.930629441197863	1.08935574064137	0.15498202464551	0.224165509868035	1.21679559291729	1.63528942408668
FAM117B	67	0.863554187094874	1.04414391582473e-13	9.57074394248932e-12	1.18365302927948	0.141072464323168	1.06475928999667	0.720831165670372	0.0538062954127001	0.892531183038986	1.59286909158184	0.473140074205752	0.94858389283105	0.193934167962761	0.354000498850761	0.340354963830079	0.340453879193798	0.757623291630131	0.190668903308873	0.877409300987657	1.00293703268734	0.894997619539209	0.485207282430581	0.607041100810515	0.484715384210005	-0.0534864130268689	1.91535751527392	1.26771591343898	1.44026509641945	1.01292961741757	0.997328867686701	0.256185043400463	-0.069041297690524	0.402149771220012	-0.340358081685395	3.1932440899289	2.18172821430984	0.334341945280218	0.112676274756293	1.55320979090717	0.464723401286107	0.18235299352111	-0.568641339757254	0.662900497260518	2.04638617719727	0.653434281851134	0.494224157745937	0.310382524430207	1.08047843409907
ZC3H6	69	0.861502183646934	1.75924410069613e-12	1.03510749712577e-10	1.31692128202295	-0.336005402565663	0.48989596803184	-0.0141594199899372	0.361537190612047	0.831597157901491	2.01618952334268	0.382935600649208	0.942837150787607	0.560203412950108	0.128503242967705	0.13699914849268	0.159158489309078	0.365874914238189	0.26921646375736	0.693330413282567	-0.62368219622292	0.290714047599708	1.25975943419926	0.922091974926304	0.816379000433305	0.820583590149167	0.437757340492819	1.43586410247543	1.82157545831577	1.10246924071586	1.57588701157934	0.402797714726386	-0.100029206563918	0.440197248768848	0.0199612932572106	1.31500111752445	1.47007724722027	0.73281203291879	0.187984524221712	-0.446584882591658	0.123091402771713	0.48593244451044	2.30396717468859	1.50805321006952	2.55957981934905	0.564387267367382	0.362210129058672	1.82913604749963	0.798738311345147
SIK1B	65	0.861368816201368	0.000101172319512683	0.000541816608264206	0.897527488788429	-0.0894242760760058	0.38353438134971	-4.47742515391224	-0.263387788633542	0.145241463355039	0.694693512390241	1.44035569424777	1.66310272825559	0.886506361512293	1.29272263928229	0.411556062873074	-0.272940669967809	1.55998076658279	-0.0347863162749556	0.443248046697044	-0.0351018522922126	0.16749042691857	0.459294820120311	0.391479431317486	0.257587333566913	-0.458438685577744	1.03074758973834	1.41586133634164	8.46148211983594	9.81489573728819	8.41048049126125	9.3532380439158	8.83333499712415	9.29323032722122	NA	7.65078182346238	NA	0.515087373800118	0.00905683824226959	-0.392772477757374	1.11923386275985	0.615327809554628	0.210529132711892	-0.219365480501011	1.54270663156554	-0.148495254978801	0.0476838671030799	1.39528296008113	-0.121107728049536
YPEL3	65	0.859359233383474	8.80292242352821e-11	2.91442425669706e-09	2.33049893524935	0.516166537161704	-0.115210131764182	0.614234139794256	0.778000215040582	1.06684583264846	0.625090552897317	0.639156317447481	0.408804804072777	0.420605734510471	2.31676975417135	0.0102280384582525	-0.269519099300927	0.073321461701115	0.222408643141335	1.20925091307827	0.299000242637517	0.293301932088694	0.73969855103168	0.224096742100788	0.739569182681599	0.624172217633623	0.198444893766827	1.65104911326824	1.88191715667396	1.27210033619919	1.53659937495322	-0.185919876396914	-0.227069568424055	0.202921103819293	-0.633551644862298	2.92310230846721	3.24995070864683	0.0278832701622538	1.2881840135399	0.754868755252003	-0.0405187087635111	1.23330656024396	3.1675473435055	0.829205695508115	3.0531604525097	0.761122570088969	0.0534875529610871	0.318296530637476	1.23125792258123
PDK3	70	0.858694054525419	5.64892437349849e-11	1.97641073269627e-09	1.48129148871551	0.669252344203983	0.915744275880994	1.14470305144501	1.04093483571117	0.716284688916153	-0.345014627900129	2.1547156845651	2.90212792379887	0.202752174341047	0.699019132819891	1.39669468031024	1.40087976273653	1.11122368074998	0.545247552174724	1.38968755155118	1.49872497707949	1.64687441092005	0.906328894273853	0.930752454787183	0.732819568243152	0.828386057374782	0.90581279788657	2.52663725960994	1.47986975378017	1.15892987648812	1.15315945210802	0.489929609805285	0.480730864523423	0.423310593602376	-0.838233133571526	1.36235637599311	0.612660469531594	0.413394575634448	0.362995781661157	0.914818962871199	0.490629342072946	0.780917311037495	1.18794545500504	1.30181822452983	3.15867891345724	0.94116967507575	0.511559861491557	0.442049305315932	1.03113573442015
PIM1	69	0.857571182489371	2.39850936489959e-10	6.71764327426801e-09	2.68381131044375	0.407091021271324	-0.602878923566841	0.981508968839462	1.02656894912217	1.65403004575749	1.59353345437587	1.88623668922889	0.854167586349666	0.949233776358714	0.288533138453751	-0.143229532867949	-0.460427400598852	1.59806341278074	-0.0436634673149471	0.857780115536387	1.07615051738111	0.147386057010099	-0.217696766945732	0.0886322420889237	0.478527019890418	0.537503677474178	1.87795813082042	3.1778333248905	0.671110702535008	0.977207883091199	0.965149967070744	-0.413278340592811	0.46214257567636	0.52942610325045	0.440609526440734	1.58213830550903	1.27144750176067	0.188110868103901	0.828652007393716	0.296870574631239	1.84531517036891	0.587434628275362	1.6980457255135	0.321234232289247	0.684422094519749	0.569174142282478	0.734176786813866	0.383741488195104	0.892099987653079
PLOD1	70	0.855886169170394	1.32449629615927e-21	1.39904651625738e-18	1.76805410223079	0.972883794125397	1.43627665375265	0.626480676006519	1.33570489727285	0.709819478664004	0.526284366472876	1.56353364184795	1.81497994625773	0.79996012649988	1.56484387320366	1.62079585865585	1.37712516568987	-0.00866783293724256	0.124052157076966	1.4093974680051	0.148882395659645	1.17994522784346	0.669389577858797	0.978078131487032	0.559632073506504	0.353785962666914	0.881316768095234	1.26987123699207	0.99230217936038	0.572282395050231	0.731992049097304	0.155441847314196	0.246289752088614	0.176003760338484	0.208573657203996	1.13294738604673	1.59325242125224	0.818751862394564	0.921900815360337	0.320769761129927	-0.00858548681463744	0.668768143163668	0.874071649114329	0.616276489546878	1.01303724529567	0.306278043730316	0.0811681012191928	0.879672013358197	0.763138952282142
DDIT3	68	0.853621760186812	5.88135588784627e-06	4.40892991903366e-05	2.06552389619972	-0.476005621121261	0.387933874929173	-0.180694424915448	-0.333936813691642	0.658585394860458	1.03669567000815	1.39500421146725	3.83794689736672	2.53856847209764	2.33403952475309	1.50626453205303	1.57287832685083	1.15810268030001	-0.686441397697522	-2.66993886813953	0.715109588432582	0.238612329163742	0.872497525942708	-0.938620356051279	0.949499837570548	0.883617208565092	0.866398053429413	3.66739355370346	1.67000292658783	0.460571254752377	0.731023709278042	0.0669057631941762	-0.103133125855084	0.0852252653637136	-0.737859118177773	0.923377882767361	0.590576087507506	-0.119419131600285	0.201921613907275	0.376559608849351	0.537167950269559	-1.00819732781119	1.1814857852075	-0.736140190536371	1.50221994003434	0.249319048065729	-0.367135819579671	2.81333436961334	1.80592172918379
RLF	70	0.853292495142991	4.55845711682942e-26	2.52789239413776e-22	1.00483579307078	0.881510131135376	0.536036618908632	1.12922739635274	1.32809686767688	0.609779926084392	1.35181472679663	0.842544217320116	1.92527616566383	0.769329461974681	0.4752163085193	1.28132647081834	1.1254291437361	1.32834668432595	0.63987896986034	0.81188889672231	1.27395569855374	0.740117972613934	0.573205424558421	0.829927627217052	0.856874580646294	0.852931136730932	1.59662506960679	1.57535404029938	0.778096521659805	0.409092764110538	0.426194905556783	0.829873078109316	0.348883007049707	0.568499951586096	0.626544132521323	1.91420322667548	2.13049931478577	0.878240282260343	0.705766276726651	0.998595942734555	0.867167123258694	0.805198637189876	1.07726510974704	0.533025108408636	1.60466569632767	0.664513544329592	0.791483425004106	0.868834431075664	0.497901129076754
KDM6B	67	0.849195479344292	4.20989362504303e-17	1.41384789178426e-14	2.07609772936151	1.0148689606356	1.03326482586403	0.479022937091321	0.933447238519965	-0.0292300793236747	0.764868107347281	0.847177770492243	1.54821941464543	1.21019131974664	0.921598787612436	0.853824909344582	0.585729296294807	0.490619657984924	0.617446262350858	0.69734378594497	0.0645884227310482	1.51391361758467	0.612478334145142	0.102300683337818	1.00876875866792	-0.256527330285296	1.82577944947082	1.8053141654525	1.39837841810393	0.435428951908524	0.969484534398539	0.151253024214497	-0.530796208234158	0.17695978180042	0.571611692620903	3.21659260828372	3.47833924956258	0.509779598295409	0.551127597418276	0.330488660605052	0.239566052533768	0.156111362923519	0.445630972477973	0.254360763437282	1.36556537007701	0.260609148030193	0.259755834797326	1.06493117298813	1.09731134691328
SLC6A8	70	0.842799545630036	9.96623075331926e-10	2.20629671227672e-08	-0.100325317388241	0.604832323428438	1.87216838668892	0.453220773092406	1.61227843361637	1.15187750105771	0.0870902888948251	1.92876434247121	1.27015476111447	2.77400187474873	1.28958574338329	0.268842013312305	0.205228822783083	0.236060608866746	0.373336484778559	-0.209294945864777	0.312434245109648	1.97515927365374	0.79942008073378	2.65972106042973	0.728261963691581	1.25421667141304	0.362751139797454	3.66467181969239	0.546176853737867	0.450066871350982	0.564921114614313	0.122477772102251	0.35473107381488	0.115112851918993	0.356264249256815	0.859659930440627	0.632377350474014	0.127638929071671	1.29806296235262	0.588108440960561	0.112104108746995	0.709767667903828	-0.383613774064923	0.983486531418367	1.16302168905142	0.221813598770585	-0.00416248673071055	0.54406241554946	0.455354143656737
ARID5A	67	0.841428607570208	7.37399463670007e-09	1.28189615228277e-07	0.589878064608308	0.674513412827784	0.738022360539871	1.15146086483625	0.76426323164755	0.390791949903957	-0.267363182445744	0.678729450291473	0.709939728871553	1.03969866337261	0.353273671730569	0.739658948984797	0.867202379227425	0.670485501986359	0.25180388120909	0.735050128365504	0.475358159995967	0.953195197916282	0.71097175758916	0.994634014876279	-0.440278241586052	1.13425912906845	2.94057441889026	2.53539904833105	0.908753409752613	0.273440439528269	0.513759498430717	-0.142982432632426	0.0443631326509923	0.0915726655846936	-0.278288045802884	0.444343260588894	0.179526277138559	0.0491105051022305	0.315219946752695	0.525722190190794	0.296824463366681	0.87225199761162	1.0812309963246	0.658702949260429	2.69878295409523	0.260393516202397	0.31598887386089	2.64505177939273	0.698103824725701
BCKDHA	70	0.838946795886375	8.68370981827652e-15	1.25079254018838e-12	1.90170919702819	0.486516702239883	0.928124274768177	0.620440221156511	0.670431569496106	1.35378900907015	0.332374402649851	1.38933252313306	1.98087814513727	1.40000116471068	0.942811401982066	0.783792107889357	0.634873675391214	0.261683350284873	0.132435438770645	0.377768564506919	0.0713401201130742	0.912576012532032	0.862548430523708	1.14650152841317	0.323179834000774	0.722114698664113	0.945038717023354	1.89345801833932	2.84646180273554	2.1879319235999	2.35656731249772	0.205687613086753	-0.223943359389642	-0.262535074617217	-0.776505067457667	0.381255812783211	0.354479156899196	0.327962051614296	0.693962312784648	-0.0608587469720015	-0.0161238539698374	-0.107900048828284	0.73141154143325	0.806000047134837	2.15619102407711	0.4967133724667	0.374985368325657	0.318136062492083	0.356661766318855
GADD45B	69	0.836698478174138	3.68224310345518e-10	9.67766783422309e-09	1.87725186871815	0.301310308491111	0.557222132607934	0.375351528479251	0.596024647357326	1.22144152021236	1.1487772157773	0.936045540819029	1.34280693559342	0.532337476296228	3.12804771312959	0.519623817294257	0.46950971439875	0.9134520155052	0.00705151232323138	0.70404005785584	0.766520388851742	0.255260740060174	0.197302769931083	0.855319371121767	0.113960253124849	0.802453251480334	0.962895101983453	1.98173971699119	2.03367265725299	0.584484784689557	0.762468224205893	-0.350459846569688	-0.43331927535184	-0.0681090915012203	1.06125493282832	-1.25888763699216	-1.26084031717119	0.650587223983189	0.120045890549121	0.257528007518529	0.790256578617486	1.63426402134091	0.9022117760764	-0.193762533863613	0.50494325830448	-0.372761459950502	-0.124491394291866	0.870378945349516	0.65742907714142
HERC3	68	0.836692288838765	9.20210152562236e-08	1.13086435479975e-06	2.81003738791381	0.302697337369046	0.590307482361972	2.12126466216927	0.854529128106579	0.114954645246341	0.721635858245859	1.27952861754657	2.28525667905192	0.423300127670481	1.00162048487273	0.498088335893666	0.506056955774178	0.447839098135189	0.021766712590604	0.428256367996206	-0.254023097129261	0.956734817100564	1.08405523912407	1.17328200684564	1.40804543018407	0.698735020557897	2.23013345307155	2.23048449381103	2.55709255468634	1.92523035082038	1.88609175140114	0.746327681802103	0.399026544673965	0.386801731590833	1.10417379799738	1.74712926412918	1.42601216239378	-0.00760283006539408	0.687310064903766	0.199097726421962	0.337625100957173	0.243569287647393	0.684502828594511	0.571823317062842	3.84976103970987	-0.137288084093035	0.221256716049613	1.03204082869085	0.694043963224317
GAPDH	70	0.831663863547069	7.58768855084723e-16	1.60295340414184e-13	1.63673888333167	0.49915461415456	1.5962216046857	0.595142656889849	0.836373552068866	0.824481681587049	0.070507140617644	2.4314667775923	2.34702809624282	0.694135384401574	1.96258275545078	1.07073817590877	1.2589658919515	0.141475295328625	0.0375456781488438	1.37338119761224	0.0477119349699384	1.24597849765608	0.444570147281389	1.14613765724886	0.658929274963532	1.08977167116457	3.54116157670009	1.66120753795396	0.743537771816486	0.692409506838933	0.626781256095184	0.0684788982571715	0.382921846154189	0.21889688926437	0.153310703791673	0.697896039771145	0.685560205328897	0.403669300180468	0.961706377459546	0.46308207965863	-0.113910806418065	0.0450061493803992	0.117109356494424	0.717805176781468	2.13733536992987	0.493993394073734	0.27255871094328	1.05535078069134	0.825986852955328
CEBPD	64	0.831178322979213	1.22126939284317e-09	2.63779918909905e-08	-0.265284539113011	0.15882599829482	0.654497395755839	-0.63539077856223	0.180143359197506	2.57612004165441	2.17097855177746	1.8406270603145	1.68987205269177	-0.226212207027851	1.51468569622603	0.238594554646817	0.720561943057863	0.557099768506172	-0.0694202245491851	0.923978860662483	0.468038575270522	0.0220992954290433	0.379472946418864	0.962324803910314	0.862977925287196	-0.0946074083185966	1.40979078918401	2.22511581813581	0.0446044811149483	-0.0783126952349429	-0.501163413807519	0.431953706578385	-0.5305650788266	-0.223282412461285	0.333002641023804	3.41800544716655	3.69717364608147	-0.465490290848979	0.506596206165025	1.04316386699435	0.150018481368844	2.59283654623658	-0.64165403341042	0.432741532455342	1.54838203838455	0.778023058561409	0.32376903858957	1.48473624006544	2.10970180027667
TRIB2	69	0.830455412611396	2.53909740988751e-14	3.09462960143543e-12	0.473411344927435	0.170286539859539	0.683495651921252	0.707508383117932	3.04275682718131	1.21222312950216	1.32406587678322	0.554531664869193	0.591960933642215	-0.692410050679568	1.47579273006272	0.736129654155163	0.503238555806544	0.173424266758394	0.344108227624242	1.00819190612287	1.17121919983549	0.917651578084426	1.27684785621782	0.680928803482187	0.284153065866928	0.623141339269879	1.12656582634184	NA	1.94476034819679	1.61283242762634	1.87998844192706	0.754652245934412	0.538668276916191	0.567736389755277	0.615150937734965	2.03758266362988	2.3543580739284	0.305638272690238	0.813976429510324	0.934323616006192	0.0422162328330715	-0.167269320611972	0.168763799048018	0.296684489544928	1.32561481474063	0.447665064346062	0.260248861398657	2.89467158943263	0.966692757359845
SFXN3	69	0.825440069731366	7.32708088945302e-10	1.71818285370636e-08	1.3170899896751	0.444334268329558	0.960981463691465	0.843851219216092	1.56217873815734	0.551795058535205	-0.129564221563972	0.873056319695416	0.945301319335065	0.536371568154239	1.56005361765827	-0.102671684369285	-0.122890382892711	0.0497840389218204	-0.0791803704714477	0.137622881798787	0.370339876064324	1.00897463089114	1.25675573161219	1.16443048021023	1.31063677252258	1.09355445467128	2.95110474748636	2.17296230782533	2.17371690619631	1.72658475239011	1.91241465154885	0.714168045355427	0.562360986157285	0.699226838305314	0.498988884517636	1.43239273678592	1.28286642223796	0.510167620200955	0.133890024645461	0.300733896316418	0.116349866389641	0.47133227705709	0.924687727203525	0.989550792949507	2.69941046396412	0.0863307147562696	0.229971338467742	1.1259856269395	1.05758368239891
CSRNP1	69	0.821295285592663	1.16484532308276e-11	5.23048561874934e-10	1.84047886026177	0.699297506644086	-0.0261552266695572	1.48839475625969	1.20144944949733	0.357377182405838	-0.319436172747282	2.55474584277878	1.56189888394649	1.26182787550909	0.681908095682855	0.810887366651597	0.400137187714436	1.58485115589049	0.30998698934122	1.34292347425068	-0.154689742724123	0.500362397600139	0.611841501837074	0.593381619918432	1.04049122727356	0.988334261385297	0.873689677308969	2.8496283699039	1.09039154631104	0.199353969882941	0.322904573139454	-0.0766266529219767	0.565296489081944	0.649715262013485	1.01390545067947	0.849200195030625	0.559824209443535	-0.00870834104788008	0.570404914203231	0.405657709977479	1.64921911615902	0.732749472645335	1.27234673830658	0.126193307155967	1.61863384610613	0.12461370064879	0.10599746683318	0.484685227140198	0.636053960760236
OSER1-DT	67	0.819101348968959	6.17592148644758e-14	6.34232825983242e-12	0.977904294393701	0.61123467739296	0.723573186542673	0.445461621370644	-0.305180975206451	0.88293331343273	0.705546081311484	0.503250038945302	1.09551796978311	1.01324542943496	1.56795429509424	-0.148565446185551	0.325834253222484	0.102945909533569	0.135123615585031	0.961858155651586	0.0632265214510476	0.627752889268207	0.584794352538792	0.148363952024352	0.603953197529552	0.906361714346397	1.31812411007282	0.929897584647622	1.53156186375078	1.25538808337768	1.3795562267102	0.977804051808989	0.626820438720799	0.694418152772853	-1.18339859979686	0.780146371690592	1.106120077679	0.302487353437143	0.451139021264808	0.412254116033962	-0.313289652452228	-0.170711918723825	1.51207214647769	1.20940807147423	1.74175598850116	0.765191174667115	0.591471586922881	1.0075297258505	1.53442285036339
BACH1	69	0.81862651485298	2.00668346622086e-14	2.54355729415492e-12	0.53930717304659	0.681805470578888	0.593284217805536	0.863691169930824	0.770687770209875	1.07642037958207	2.09141295325459	0.531090352682288	0.588138077704884	1.54519168581041	0.200088759544206	0.00223186618879746	0.271507293626648	1.12995706980029	0.340234551813164	0.926387485025122	1.15502691574788	0.293630272520395	0.593815091335822	0.565666613763401	1.76189790873306	1.62074407058046	0.344234249320087	2.04665639550607	0.289218717217608	0.322005982644704	0.202278549897824	0.0440474908684149	0.11389225650389	0.0589793089914845	0.363887525763288	1.43376844689311	1.39272333960119	0.115293980608855	0.573141002394932	0.788177146705455	0.608531096339283	0.639425690457434	0.484166822529902	0.511068586809829	1.56336503634247	0.105733123917997	0.0783622401927751	0.61067839238329	1.65785038461338
NFATC4	64	0.811676199316111	1.36994118152736e-11	5.95843829189019e-10	0.96734005181468	-0.184090742987811	-1.26764067554046	0.520636999642027	1.64161285451438	1.01531249106231	0.949858048559814	0.405371966137677	1.36144086127181	0.215524925325217	0.629905963822534	0.814080111698459	-0.0281213918896366	0.536571527372268	0.465914301403277	0.732723764509399	0.320796217703248	0.603595732644614	0.594734635134585	0.716326931216168	0.402949012437194	1.01698047694252	1.19589754007259	1.69807376959092	0.769780750208524	0.336453029806432	0.554220304839655	0.454421406212054	0.00463294690597261	0.217854845597927	-1.06109253015969	2.66414989506318	2.71068852110537	0.133533202008919	0.402130535400768	-0.0417614424101749	0.344407556501888	1.74108156825731	2.04498411322084	0.979191420691973	1.83250178345724	0.202076043767219	0.0409076906781549	0.357062599879977	0.620913012154758
C1orf21	67	0.808622869459927	8.87863196311144e-08	1.09902798105881e-06	0.124965595980051	0.411005763045663	0.468624556023123	0.945389665835136	0.617475507487968	2.4334287088578	2.5100774346084	0.949689218510494	1.59671539118134	0.233541686756691	-0.354796877474775	0.215582952503681	0.227474595791392	0.161053641644428	0.0893675429963206	0.739884082356104	2.00734437207659	0.24482750623643	0.0909840419731103	2.48888403457822	0.348686694710605	-0.0799942391673831	0.587002087911032	1.82674206762793	0.618701505316863	0.154388815377428	0.167992266337777	0.258732670002248	0.0621823059774875	0.219275310299168	0.0364194239499034	-1.18278561128992	-1.25296298119559	0.283110183249592	0.216880753313119	1.17368423651327	0.310387336956778	1.22202101773771	0.881301756284983	0.368505187653555	0.551391450415486	0.423794112058428	0.462616699882032	2.04351698088017	0.321697627230214
PLXNB3	66	0.807126881895244	7.16291882209627e-09	1.2501012219649e-07	1.03647550921731	-0.32534577698724	2.0845429995488	1.24320661170946	1.00517856754612	0.765369277360156	0.673515619383261	1.41102152265694	2.45165106863779	0.733493859480243	1.66520537488704	0.782566676205534	0.606022630431573	0.433079162702935	0.175020330970759	1.0476012283638	1.35628838930556	1.61921468157344	0.871962156658068	0.475535698446783	0.173105502873358	0.226876911344039	1.00575236286098	1.7323579133845	1.04899509283813	0.368770317756939	1.0775508433702	-0.888812011554362	-0.325659210145331	-0.0196925192074454	1.27664218450793	2.3168227480242	2.32271170544883	-0.276990569594799	0.411943507664181	0.639711733965624	0.365658397374765	1.30841902524196	2.88818791764116	0.349578492051268	1.97753575008565	0.164734658988669	-0.0388261519183419	0.181437465249691	0.388307126619098
BMT2	70	0.803550209654645	2.52130445387804e-20	1.99741340699724e-17	1.37214870082698	0.768021383688576	0.0944327362017555	0.887386907796237	1.26806393851499	0.729899802063262	0.893705482650553	0.312839129376658	1.0428458539488	0.459397938358742	0.48385559606797	0.85781737569183	0.54193625395057	0.981050174905689	0.529008154695436	0.505724047661955	0.987650995904114	1.30818297958155	0.56902951127863	1.00838821392764	0.948471449308151	1.00630598996092	1.27354854661663	1.66700485652931	1.62572320334388	1.23555124778999	1.15112152605691	0.849028690630444	0.587096457709722	0.492328455260219	0.491608532920526	1.78710174177817	1.82524457767076	0.718314882331668	1.08877874896473	1.2854256087504	0.602917971081538	1.76413088131538	0.737827579228153	0.56320718049154	2.41556229231541	0.584872569010281	0.865221997048622	0.759275444126863	0.287430293763151
HIVEP2	69	0.80053619511293	4.67761410598886e-15	7.62932618375331e-13	2.0321468437283	0.322200613677896	0.286567799555728	0.926077966829864	0.881458709087811	0.671820506895937	1.44850162978703	0.246437537367137	0.728785680224631	0.50591809743172	0.00971606459884218	0.318038332768181	0.480674206429356	0.695304665875533	0.0642463135848513	0.303090744465092	0.99526771950735	0.608653168500647	0.565388352000836	1.09509381394668	0.831125692947423	0.711829659267653	1.19655081714244	2.55171742044262	1.38805155024786	0.507640717977869	0.679029312089929	0.103270859212505	-0.125048401645196	0.148623443358922	0.993936736119108	1.18273836984782	1.33240015866839	0.326693314459376	0.239059752346643	0.42265157176122	0.46552337689409	1.45814333114	0.449186069647952	0.450511211735452	2.2869332525437	0.519177860943596	0.348511199493259	0.775697981653755	0.563223979260493
HES1	67	0.799828842383963	5.94742423280008e-09	1.06649769063841e-07	2.60655039963764	0.120470402955787	-0.551167030871225	0.216889815971679	2.15231014211136	1.03746464957054	0.396164777517195	2.15508760815599	1.05551688636136	-0.446900566944757	2.909709560748	0.556550744847064	-0.298810830722511	1.33103247722685	0.138264824985388	-4.75442476404309	1.41477741236058	-0.570967541028027	0.548385272966722	0.467988709962936	0.661405674862949	-1.35833704495051	0.882398038523719	2.65655644117427	1.00945856645483	0.721171594776081	0.828099864315952	-0.226119354777809	-0.247078186150538	0.0807665541320742	0.168302601637067	1.19895747218915	0.868952467231495	0.730946004877244	0.116145096080071	1.38680173208985	1.07513490091049	-0.659708820596035	0.593768550663873	0.0908084791147073	2.73698763107499	0.185242436511718	0.0566143300614547	0.0328792782086233	1.66797939817832
AKAP12	67	0.797876246543615	2.62844103144326e-05	0.000165307850749856	1.40527129754247	-0.376990403939047	0.174373733081352	1.68158258733191	3.90693337413359	2.24091650339799	2.19586121454163	3.03492570270684	0.71772848809742	0.405227411473343	-0.949622061433452	0.271590186679806	0.385862445624363	0.191961793448825	0.00780060649903565	-0.0839308224577776	0.440987333916751	0.142704739559302	0.68274837729096	1.56914836654733	2.4235023371998	0.24220084120581	-0.423794031079996	NA	0.428244347393491	0.243348901091037	0.376523021321768	-0.692814693724277	-0.493799338498835	-0.195260153992442	1.29799248887736	-4.40161596110034	-5.15115074372435	0.0655222805207919	0.230349407804548	1.21966894124864	0.567193600801117	5.21410528386581	0.111352851392601	0.526212683414162	5.17090067976558	0.373046796109699	0.316666636195372	0.0106545685016643	1.47695387272851
PHF21A	70	0.796817260354487	3.49337679272069e-16	8.07188375168024e-14	1.38530560090586	0.29908687043089	-0.0106984564886576	0.946180724707903	0.628489828456467	0.443991919387775	0.792539119801594	0.454990067100662	1.63956678114774	0.544845550364026	0.736963302401528	0.456264313532033	0.542620486676552	0.436552932341128	0.344818660039055	0.891411503391851	0.54113450479301	0.450265465122518	0.5475890009812	1.03816394451175	0.857931593037033	0.419372604362305	1.19732168021489	2.32061986537758	2.11338439558341	0.851644506330224	1.29052370464505	0.201109721659215	-0.430222734927115	0.019263163487219	-0.122647564207494	2.22721702200332	2.48034380951267	0.226084875080623	0.411153495313281	0.411600164164528	0.213372875281574	0.000754371635128775	1.28467918354571	0.348795199088615	1.9625485253122	0.182537171859197	0.0934770369351725	1.22353236542496	1.39400895880405
ATF3	64	0.793979208959146	6.78892830636757e-07	6.49383388063154e-06	1.58137248878123	0.19380524485558	1.79948162922886	-0.880878518672648	-0.413591172491312	-0.392020007697116	-0.521435542760037	2.43142341110182	0.922483142378929	2.22987195434825	0.528694160813902	1.85757295976794	1.6776166360828	0.86578877073735	0.0713251491516264	-0.830544399048834	1.72197986421085	0.162772009587261	1.31870516562547	0.384651833685466	0.766284088801993	0.797978976350127	2.22784531200401	1.86031625822046	1.89696195541402	0.910283649188424	0.783816978641392	0.596856899556292	1.19612984816687	1.38745682476438	-0.484403807216465	2.72983985144676	2.42115355623343	0.380525421624449	-0.102470158932028	-0.724638751488122	0.582979238558699	-0.615604976064366	2.341346148845	-0.927420507972501	1.17695824036039	1.29246377391372	-0.0687515224100901	1.65027899813723	-0.880916162684095
CLK1	70	0.791404955504318	9.02954404914353e-15	1.29221513611679e-12	1.74371134633763	0.0618198523913474	-0.220614381976958	1.12220801998747	1.12307562001911	0.0981865267392004	1.75992355345136	2.25091381753924	2.14962515436485	1.15764021539042	0.70248226384756	0.657099665016947	0.733071971617348	0.49266088758999	0.0158780618798692	0.816198775366358	0.890727289470418	0.376613917072826	0.181839012385517	0.103174029596671	0.601390503317119	0.872240430294751	0.759925060083911	2.84649038847307	1.42186269478688	1.10674463745592	1.17196406922443	0.362927581406896	0.118741323883258	0.433675522906274	-0.30623481729874	-0.309867821829096	-0.0822457043827216	0.399948813201127	0.696992282936501	0.534661265756702	0.528655405144977	-0.127271293297019	1.09223149634928	0.396585246322891	2.21730735429906	0.257706118907735	0.137653098604985	1.62769323203139	0.835748146213976
SYNPO	63	0.785594154240044	8.92869669384118e-10	2.0025920127683e-08	0.856558595612778	1.32411898284232	1.33675704086325	-0.0797443533116429	0.076084817039098	1.63805982869766	1.06327351177214	0.212349215171638	0.574913299571369	-0.201025715729653	1.73746184064286	-0.224494752423843	-0.426979209522963	0.33716524642749	0.25305129116028	0.973669181901041	1.20407785526331	0.0625742122601488	0.902967195711993	0.672345368916605	1.86963344572159	0.124411027554445	-0.308142069329546	-0.167249086250002	1.96114663003013	2.22403681228624	2.28445676796208	-0.462423168019207	-0.626479947049686	-0.612690430088601	0.966906067854913	1.19490172655279	1.00131938038867	0.0954758266288726	0.738397195174275	0.938747566992842	0.303987076913231	2.16324805843517	1.23356870163761	0.426476468612209	-0.112021019204642	0.125653360075047	0.0595746286955911	2.59262264802626	0.837821414117133
NOL3	69	0.785485618529003	1.11866500387285e-08	1.82591811007414e-07	1.64335804467958	0.513823628935761	1.50481759846978	0.727271503302844	-0.175557780563763	0.989665894162343	-0.149400706790689	1.59949862062371	4.08831829014788	0.469054526933996	3.34361715603512	1.3918144880755	1.28159738004026	1.34052386092976	0.16127972590922	0.916711173044505	-0.0988890009734653	1.25188733715883	0.29026299436194	1.30339049648157	0.642346111084703	1.10867691217998	1.78817033122593	1.0350424310083	-0.22954110854982	-0.224825925718246	-0.110670963501415	0.834596032294714	0.572406218822543	0.690851051382723	1.00085123838335	2.97653050494873	3.16806231166508	0.0672538154281696	0.0403393095488579	0.153054651022916	0.518587951830469	2.49142935946943	-0.241406030670528	0.636409067996541	0.943666377003539	0.578360951372743	0.342718572664926	0.571370089824145	1.19207624985132
ZBTB25	69	0.784771136171749	5.0045468066188e-15	8.04426501916075e-13	2.12170494996149	0.0909587639883393	0.557762060553985	0.780901624751844	0.996922303244242	0.467152938232833	0.974450056913913	1.06712872769813	2.54742954349937	0.428918945096602	0.601251136382931	0.577548175678833	0.679978054004715	0.911717197585633	0.13070679042609	0.202117940601416	0.190541077216834	0.596583837733205	0.760226524841707	0.775335227880296	0.559077614151165	0.809500499016685	1.63255820967867	1.80773185799333	1.19271785908367	0.263961615873765	0.8042949579012	0.0514941323147771	0.278944764377024	0.390349074053159	0.192501241657095	1.99282074569926	1.26616214274284	0.247374208569431	0.42729804265466	0.0304857783369858	0.509521906668718	0.425790870051732	1.18538230177537	0.857994466162714	2.81228609070115	0.445356386623968	0.447870746032757	0.531565765575496	0.383545220309487
KLF7	69	0.778693819156102	6.44240003458691e-14	6.57266597223388e-12	1.07933924151856	0.79358837446482	0.210154246837306	1.44927921966652	1.66022483571341	0.433082148424211	1.26948981562651	1.39187415952389	-0.493829824685274	1.31847523739343	1.90167006157067	-0.25458811986007	-0.215315566933798	0.68125829481174	0.333357527092177	0.738312853606067	0.643733216694299	0.180626832037698	0.406478547251331	0.916591621505803	2.01529118865683	1.74072965721949	1.69064062813342	1.79241618523942	1.08120625217985	0.45010225399588	0.69881117020142	0.257265002310875	-0.00339517154080204	0.383439548549167	0.90245293983575	0.1685766304287	-0.0857662591315784	0.261175598411623	0.651232603745353	0.652528801425221	0.836372881097232	0.226715074488607	2.42867461632552	0.946734792480238	1.17378171779989	0.262056891813125	0.245859934486164	1.03303658752193	0.572848435927812
YEATS2	70	0.777368463042298	2.38897415820331e-16	5.82332140409513e-14	1.47494695866395	0.274058594892063	0.544315024779116	1.01807331679758	0.933555773869558	0.382959956005706	0.585648004754097	0.00959437888207226	1.68405706326765	0.663545929320623	1.18990310463831	0.838683517739616	0.77943348467514	0.543399128988707	0.476580354679656	0.976097324239662	0.646327748100658	1.02687623088555	0.602766022012807	1.20585137282845	0.955724807469312	1.05217138865117	2.40194487536856	1.70051069900604	1.00414930376042	0.464339076170863	0.710908965562627	0.328962658093255	0.221924086544238	0.441802216114135	0.466143997504623	0.857925968529726	1.13296325718109	0.194456172942086	0.602994150762567	0.654667787308528	0.452733498197695	0.877915867526186	0.403863914931433	0.710745377040512	2.11925055319318	0.297696008558005	0.288742131718516	1.56883366471477	1.16716503840728
KDM5B	69	0.776897618559594	5.92693873841398e-18	2.79726287437232e-15	1.35798166066793	0.492280671605718	0.753597379640744	0.754061524627519	0.649660445858067	0.382406280873483	0.281515386622026	0.579400442971095	1.52406046761013	0.49136058027014	0.159966633312671	1.16787391704684	0.864540853240665	0.57651958007933	0.56041147350675	0.584392780638025	0.668787246971642	0.486708500100491	0.354015956514598	1.10491575978063	1.04431404326627	0.96470357930019	1.28558669252427	1.05115960869048	1.84397693280754	1.48164419154095	1.63709116241386	0.394273793104177	-0.22702818369536	0.0149310374886615	0.351493746355631	2.73107085682442	2.63081161447662	0.481760187533601	0.530000165206244	0.584970532846185	0.468817979320897	0.725600503784928	0.668318154020199	0.498218222030128	2.48512438242917	0.431447718304063	0.179341308601155	0.641109841049581	0.678540150007805
PDLIM2	68	0.774511580599006	2.0877642083182e-13	1.73448635464099e-11	1.15180229188785	0.856876333366319	0.621405794466029	1.58217392386634	0.0264634613358441	1.27903817297215	0.53600777876622	1.78490980558717	1.50222600002672	0.996250644867149	2.13406052386196	0.397310963516	-0.14249037057589	0.266220941569201	0.034553758146515	0.534460841362325	-0.23708724954758	0.44306237591774	0.442204721873079	1.72046905773336	0.458871775483114	1.72926279563207	1.41831106384706	0.349289216384517	0.747367222861497	-0.174586880129597	0.366931827262396	-0.606030984427441	-0.682841699489458	-0.477847672548419	1.0936560662672	2.02286189593532	2.17352902900319	0.726840073215092	1.50443865931489	0.214194399675356	0.096424573914574	0.0252136731855246	0.644194271337667	0.997265238851482	2.20920790624986	0.11817276782621	0.00702303545535368	0.48419189435391	0.470896204955568
PPP1R3E	67	0.773735142453969	4.40110477596887e-11	1.61631301557188e-09	0.830486785170347	-0.0940715328667527	1.13164212249035	0.312017005888862	1.20625774675353	0.0286246753298404	0.769139044847039	-0.207953506330834	2.00681742582389	0.349001409407849	0.970742774872887	0.25745985239033	0.373626759688661	0.350807579274459	0.178298481884484	-0.0240006917431556	0.0457936294097278	1.19709245019331	1.24518105238203	1.27829152150592	0.958519127776615	0.321041524373463	1.93520319672391	2.05032613559567	1.14032603133466	1.25354680757081	1.03008560227113	0.299189150935632	0.630119058681973	0.266126320145337	0.666297752766808	1.76110473545037	1.42154421105461	0.0625344258634614	0.114446630712109	0.513416128845189	0.024876847281264	0.31260809279357	1.91851510972718	0.639199584356648	1.93297504190137	0.32789792351729	0.511292282540243	1.36255496295128	0.409751527989395
ENO1	70	0.767739057534293	1.773867112124e-10	5.21855706646348e-09	1.27983859167083	0.66580880886687	0.957297551656406	1.06365959591066	1.41011114880999	0.860551817468209	-0.335171223167306	1.44706393769556	3.24821497239324	0.573963071100438	2.59520032475945	1.73796031902683	1.800988239581	0.411245743393304	0.150544999352043	1.28969160882612	0.529418319489394	1.02235085216409	0.599157804123933	1.3574192813362	0.397522682323764	0.907857572926674	2.11893474929487	0.882092165170547	1.23169278435026	1.2635625479148	1.19074877695722	0.562428667476404	0.805556536044734	0.855394449810061	-0.00549719738290705	0.623534575903916	0.478873172666119	0.660377368790868	0.59660108317812	0.718036905014003	0.162339021110341	-0.147673923153609	-0.168289212857419	0.383808975577378	0.468615013526842	0.758705501584241	0.423071003054094	0.646992588925577	1.15382068154142
IRS2	70	0.766129973694583	4.48399147441625e-08	6.17404710648673e-07	2.41716308941981	0.230926267457196	2.02833749715924	1.13557205360285	0.368584052527273	0.0945683500177154	0.704159339019767	1.2680543737285	1.68444164608203	0.891777117116323	0.282342594441647	0.110780861384495	0.024185484382855	1.90312087350392	-0.403599001439939	-0.180854780719698	-0.289936949028392	0.110317820518044	1.78687527609651	-0.0108513615737007	1.76925550539832	-1.44967651305835	0.911834018444514	2.24591829009398	-0.538170416559119	-0.37555756944026	-0.157080375017809	0.0691718125862087	0.380692303192294	0.0826097567206393	0.869427891925611	-1.71525118593764	-1.97876326619516	0.0423579394194677	0.509022765750172	-0.0491712491795821	1.78959527339335	-0.148803740906941	1.05710878970586	0.89374459985187	1.12955481015864	0.169458794610762	-0.00235006737680719	0.65338556438482	1.13786326335071
EPOR	68	0.764197260739495	2.08843675669804e-15	3.83542066080915e-13	0.724788286223363	0.651969810566336	0.583545664580648	0.294064815816912	0.481059902505989	1.31509955189939	0.469284881503101	0.466180835445494	1.1022534558121	0.861568231733073	1.16469115204419	0.273640812137828	-0.0942399440008877	0.37864013469467	0.25427967977131	0.599158078005764	1.69111529643666	0.689766792638938	0.203062442257793	-0.221658384467085	0.781470576446274	0.0946062106194291	0.943414434784892	1.23479186848396	2.12487381668488	1.28717833253824	1.76457400380426	0.122694166297618	0.069078768020753	0.316550691273952	-0.638091569915485	1.19661011336679	1.04583978507109	0.25730559981912	0.646519950091663	0.791972730972131	-0.0940576886908631	0.853083598760297	1.6981390854658	0.933532320488318	2.27790955270229	0.325803054688032	0.144822674117078	0.185803184681454	0.971001037928019
MAFK	69	0.763371041001034	1.85359795727534e-12	1.08201341811268e-10	1.59146282480526	0.470540337507449	0.319685330272663	0.310456983744222	0.0993768767377883	0.686093906165842	0.696489080849819	2.82605100922323	0.839401203924989	1.2505100912186	1.56777929254667	0.265631522244521	0.317287325172235	0.982921387226803	-0.142499974922172	0.766597840640019	0.29871651766766	0.768732357443396	0.78212913052773	0.228425355331076	-0.0540630353657053	1.10779265479348	0.924606701686645	2.98657957795852	0.869988336645049	-0.0267429026108435	0.341693658970092	-0.620269307846593	-0.885022037585113	-0.461417764671489	0.327035561494831	0.454755955533333	0.904287850603554	-0.155750887776555	0.696256429944139	0.686755646751139	0.545059788397247	0.0340972105854579	0.0750014438066022	0.577311054704206	1.45613085599997	0.0780259278480521	0.156691360445754	0.819272236728101	0.224729969094057
ZNF654	70	0.759058455828874	2.90730479177177e-18	1.46567806570639e-15	1.43055641048453	0.67180573400237	0.692888572423653	1.42138532762022	1.5758469066783	0.344201414965546	1.28493939467775	0.294565924290155	0.993024748394907	0.486712515144297	0.0684961056255081	1.38582836391192	1.14361506253923	0.547064102055693	0.59873883335665	0.499383029157817	1.00976089794767	1.11908989267041	0.73432915234283	0.992951205994114	0.809258130038996	1.19653723974824	0.974208310624308	0.851634945097187	1.11719007708846	0.780246649039644	0.479650255059833	0.388405773304648	0.407580255992504	0.25417943402293	0.265011575762158	0.797533789925364	0.734407739172187	0.754975505979111	0.732752378343165	1.01095915265208	0.215852530179952	0.408418664049056	1.19457778413871	0.676818431187597	1.64398746198391	0.542122223331297	0.394619610402481	0.742208781975382	0.480808832054321
OSMR	64	0.756177548084227	4.67799793712442e-14	5.06182196298995e-12	1.6205969868175	0.521524181391275	0.547601577203956	1.30868444201054	-0.0991539957666768	0.878981758989257	0.927033994316347	1.04455645628451	1.76234668791011	0.729135605873003	0.388880358086073	-0.457380737720351	0.13075797358159	0.167202444253238	0.265954619252279	0.674461554043374	0.627269348424509	0.641372298712176	0.695177147499338	0.690148570018899	1.0357287844855	0.84715498721224	0.912922667659166	2.51545987085733	-0.0189602311781314	-1.48444859782733	0.160074153675903	0.16297799356497	0.421176318521606	0.801003867952253	0.979816515080987	1.40333139664206	1.39906757733028	-0.672988985396322	0.412989626283252	0.469731023456239	0.0272342394935249	0.979415104225622	0.104438154294825	0.499215576453646	0.753510876216876	0.550222689466587	0.37025674416557	0.738126757444336	0.633756367324787
PFKL	70	0.753868569325021	3.97600459781712e-17	1.41080229101073e-14	1.05296264739385	0.812157366983225	0.885738887254384	1.0975220274397	0.679916134134734	0.892694707025903	0.0604351197933388	0.916962813829902	1.75921787340393	0.875207102477973	1.42922672307167	0.417139421007434	0.145884937025434	0.280087690267439	0.143325154543396	1.41814557209634	0.315503721095655	1.69746651824076	1.20677392513486	0.929292443806647	0.166541890799325	0.808022305031431	-0.184537640435573	0.703194790763413	1.41185811616588	1.33187010499247	1.26513475790319	0.164790345748796	0.191301556207524	0.234324742156732	-0.199648675382035	0.679947850014752	0.742406704962076	0.959412861230481	1.11973073174876	0.259103431470477	0.0565802400023842	0.279501549636704	0.686056216164959	1.13314155657747	1.60470988867626	0.512593194374045	0.173619007325693	0.224297830785758	0.515098428961425
SYDE1	68	0.751541229496909	2.57043122204463e-08	3.78852527358099e-07	0.882608085481057	0.266537345953567	0.688811571014924	1.41036951610667	2.77536085486828	0.407660708276028	-0.34076843517205	0.668734175998359	0.162617548643914	0.435397311388905	1.31820632018708	0.826919457621558	0.593206929034977	0.306157146305727	-0.0928448794021732	0.566603308993779	0.578998976024241	0.672180305559095	0.535524126230594	1.4304372458289	1.73225720757582	0.511118160460571	3.20814330737523	2.02504124966886	0.939425865112015	0.807440473051786	0.59414641454597	0.736558091720606	0.637627775745096	0.60533603061679	0.683414035573573	-0.648171346874576	-0.680436159518213	0.28963752184477	0.261244313350479	0.791772932880239	0.307544513994814	2.12974930798591	0.495390987929332	0.394248395753468	1.36811271557666	0.0579073508170321	0.149967126141978	2.75605860640929	0.337813727735919
FN1	68	0.749189964427154	3.26208102899173e-07	3.39715875047392e-06	0.750212529803547	0.671516987004277	0.909178687233318	0.819890296739504	2.97468808827418	0.331068178518389	0.843218085285041	0.27483851473085	-0.513484616292406	0.814328842728488	1.80766935762319	0.546064906837065	0.757711960905651	-0.0486811363819805	0.0753532123565643	0.369565431689869	0.364516082906278	0.928199668717404	0.413628040384139	0.533585037089443	1.16192683075465	0.436346578713317	0.0976537560158736	-0.0777305316359856	0.771898094488267	0.914905809523754	1.58572237010726	-0.0257641069623911	0.0401387974045134	0.342865324535098	0.507271850699935	0.546332124246732	0.839708512583516	-0.747507118486456	-0.484846958396848	0.0387064636454449	-0.0373197363111352	0.64972880487162	-0.415733607799108	0.756775017789807	1.76732644811236	-0.424634751940163	0.0546570858997228	1.24152329043691	0.78506614002934
VKORC1	70	0.749149332000686	1.66797801478096e-15	3.21731202816273e-13	1.29197126651868	0.640911660942484	1.42539045698163	0.67006238477447	0.557796290682529	0.791018446809466	0.0290009153539969	1.91577758542107	2.28743113618261	0.621824444791123	0.499477760927919	1.3324114120425	1.10292072610207	0.15407927330978	0.0894712268625248	1.15869590207057	0.165285682252089	1.07741241280254	0.837523590207618	0.840244909476478	0.317722508188916	0.437305237024542	1.82476552603726	1.33436722120045	1.2938306482677	1.02553179789626	1.12981078648514	0.0813208726588383	0.490600735575261	0.541098347932407	-0.178945345305005	0.668842198659907	0.654087522269684	0.378399445139114	0.265633197711376	0.346975577796814	0.0174600498789451	-0.511730427038273	0.78806044969151	0.672715545662418	1.67704754576101	0.369636746491848	0.110719168649897	-0.133797169004723	0.250110760209697
SMIM3	63	0.74675938104521	9.62098788360239e-05	0.000518999886269621	-0.464009465639642	0.00487867599717262	0.908790496502185	-0.0418021867442381	0.181372389712959	1.77537718685148	1.43674268207291	2.19801601780101	1.51804941548931	-0.393485334949711	0.0687221056294609	-0.0121418653680986	0.00506300327881857	0.237349936306994	0.776120105638035	1.63326629898959	0.920309423440765	0.39812299291653	0.217092633862944	2.96866347761763	1.27202649294493	0.244854008197237	-0.563365446268252	NA	0.634080178695135	1.12783081886893	0.922815149015949	-0.371940555623366	-0.135438998394176	-0.281660552875002	0.52852728681213	1.72647343527782	2.35777159613363	0.62252336207446	-0.247450563483935	1.27444416777984	0.0328705923156049	-0.398572138477788	0.119873164304821	-0.000384844730665028	-1.07662398657421	1.2032203293063	0.661249151137695	-0.456771885943126	0.335982065657787
SLC25A36	70	0.746454428203676	1.71804727761589e-18	9.07374397906564e-16	0.341426337307129	0.496475627388717	0.885209821662177	1.39260996165739	0.936943450199371	0.657166729368951	1.84894332789238	0.688209814416126	2.0939603298519	0.993237917942151	0.4484596862079	0.782092159297775	0.499525810172974	0.962741992338442	0.575677437286913	0.489113134761581	0.49370931965704	1.18153756966948	0.819616346611836	0.70718345873839	0.778055900692656	0.721951433138715	0.859439121289786	1.49526597279074	1.31636394549692	1.11835697858088	1.10197107959318	0.760811021429713	0.290512924341661	0.467493557352668	0.651720651920786	1.05909863900858	1.27501976535536	0.281758819168445	0.382305189686644	0.941076853665916	0.59280731928914	0.571632789337981	0.614963115582822	0.32578324121819	1.23619878477491	0.641199531294131	0.732379834432707	0.541020938381804	0.723535463737087
KLF4	64	0.744985904601746	2.23961081003676e-05	0.000143362087426903	2.60137644656449	0.423220213953612	1.28513213994123	2.01121003168165	1.02002452453818	0.629603125458854	1.32765065661755	0.467341967976435	0.636014018030923	1.96376917411419	0.128838596102756	0.680821215103091	0.920311762478001	1.31371840373066	-0.445305631226692	-1.95815896354888	1.52739180038744	0.117458197393953	1.05294415251396	0.823933400033103	1.61524761222962	-0.400944030093559	1.16249830681316	0.889731980531382	-0.349453629335088	-0.418711285054817	-0.595869361035509	0.700167634798945	0.247419230453865	0.404171616368071	0.642584768805486	-0.56788946506289	-0.763180859616459	-0.201973162821341	0.559984903943909	0.208122765856792	0.705540528135511	0.537901001302352	0.916608418574053	-0.166502190150465	1.51427591270921	-0.618634569241926	-0.156653788123958	1.79164130523643	-0.596672478128253
S100A10	68	0.742443131425252	6.79457445491127e-10	1.61367505951651e-08	1.8682215646564	0.974999270736119	1.14262801360432	1.12906509546053	2.47710849235167	0.733711370413163	-0.196682812094441	2.60498718788807	0.993578084250997	0.564548078817174	3.73024455140315	0.628954102648174	0.875812816223404	0.0101604546726716	0.0576863803426121	1.0913481808791	0.0759008662854771	0.8285456837085	0.447984728959471	0.698287709703009	1.08466951926663	-0.388602889016488	1.08861329802926	1.37476933270841	0.920085630450113	1.30791940016766	1.08167760527237	0.339980093012574	0.349847699751705	0.544614280813291	0.524667105526582	0.43051827158359	-0.0324721119113389	3.09900553243396	0.316511823384426	0.339210279733033	-0.0366264825840256	0.0723484250383141	2.66356340835958	0.716959552357935	1.30700003068011	0.229439178115985	0.00963135611122353	0.216375781639582	1.10377892945459
HCFC1R1	69	0.740757650094765	3.07524873432576e-11	1.18429110112524e-09	1.29767023258958	0.525233575037095	1.77481867058211	0.353071763610421	0.0274560575163153	0.977772612771711	0.464515487038914	1.26051404461684	1.68448048768054	0.0701968933942215	2.3078255212369	0.317082270374043	0.0711749087062948	-0.0516328269094293	0.225421993192652	1.43786676286975	-0.0465093450406772	0.178362602809875	0.905271750876773	0.556642207523562	0.322737790108681	1.18983566530084	1.03917488459841	0.496839873234797	0.0885687968914021	0.0354274591246699	0.281965343855625	0.0148813832888396	0.240259746672253	0.127657723590813	-0.157724170487122	1.43347949461924	1.71893048762584	0.211637823797103	0.431371697740815	0.258412835079456	-0.152296880134503	-0.203658791265415	0.905330858234577	0.607316129967919	1.58926385949916	0.0747413820181086	0.0410142979406847	0.423380397491966	0.320447893027171
SMAD9	63	0.738547252950841	1.53424774777846e-06	1.34145382503831e-05	1.89526325352354	-0.208666664970019	0.503854664586722	1.18916259475223	1.06001962634833	-0.200575222422562	0.677444089467937	-0.491283534577527	2.00304965513877	0.908315307064944	0.183916017148428	0.267468428050392	0.159150711066878	0.991654882839799	0.174985353163349	0.454814934823484	-0.330654925409592	1.53549963694065	0.494417807770748	0.605035954435531	1.66662676150939	0.60350469962398	1.77292919705936	0.492806147063049	0.408074967451528	0.0502529428708543	0.233294973784512	0.316837558191525	0.265861495710415	0.807220228455606	-0.277321354539851	1.46547105052975	0.732439713184548	0.25889773346673	-0.233703234875224	-0.26871733125696	0.383653191302059	0.391409915532556	1.20102724239642	1.63455046631141	3.1722391278104	-0.0266286879848582	0.0874775853637468	3.69897642772921	-0.244725437579166
ARHGAP45	66	0.735713342391814	8.62119269603313e-05	0.000471033139787563	1.2044345623511	0.731447681769523	0.867491481011042	-0.54995560960705	0.167037778259363	0.644306706940564	0.28651550323386	-0.0579068631825571	3.55753463323832	1.26196570470505	-0.862469370082542	0.131819169768045	0.757733817835707	0.851753676842603	0.522423275336867	1.33636972388146	1.45845266685426	1.50011161460224	6.05496365951835	4.08802696168876	0.185696002948165	0.648787330446842	0.333343692936911	2.29083953810008	0.878917343431112	-0.100433205284848	0.447057149195126	0.596512232156428	-0.710948991164405	-0.211616423364321	1.28004752678918	2.9023718080964	2.66258940109501	0.0552064265046319	0.935910061840044	0.333186365412987	0.456728919134331	0.623201856832244	1.09054641476231	0.637904483560907	0.398329900934737	0.149203285440645	0.149547616022879	0.305782482866983	-0.22281503919738
TSC22D3	69	0.735441700464025	3.14203890189048e-09	6.06878406971987e-08	3.09283112094691	-0.0604045991933969	2.16570232293268	0.254275343442056	1.21147921095494	1.30608065401716	0.791480169791206	0.964677322641392	0.846087369824185	0.149397726202508	1.15952638464038	0.411782735652818	0.152341601678543	0.138400274852405	-0.13820282844602	-0.70428387507623	-0.338639531919083	0.436117047858807	1.65377841818673	0.0363643868006551	0.928473921295027	0.831942591917577	0.791459370577171	1.46546347384273	0.996933701235662	1.03645902570955	1.44827517075608	0.19112021004907	-0.251240075450558	0.189783563278439	-0.0682493331282428	1.70798244425793	2.43167807975879	0.112048525738506	0.478112286198516	0.156663391889847	0.0401210448413144	0.245819604521547	0.55898490361944	0.154745058592721	2.18557028848951	0.0645739185227042	-0.159431155293092	1.08245513795402	0.354975775634639
CSRP2	65	0.734989833409132	8.75988949819254e-10	1.97672297913435e-08	1.096276380983	1.20426793936818	1.4598300549528	0.678353087836153	-2.01556586045762	0.772565209779996	0.0382728921144732	0.874963997405759	0.158339816527819	0.478915079545841	1.83412785658134	-0.100822583564455	-0.585558675535816	0.00638935893060321	-0.0914989726323494	1.64290276948237	2.01728800899402	0.158161983394118	0.866245489829519	1.47851761465267	1.19284993057496	0.503555259928728	0.932145929513143	1.43998759901302	0.403108300842701	0.516383939254899	0.468702057504023	-0.177104983049611	0.145086570591738	0.621284261167578	-0.0492455295281497	0.76808958342656	0.290305729529853	0.321986175652918	-0.0444987062194874	0.840187101101669	-0.176733727814884	-0.257978069793443	1.71791678542665	0.956835004224651	2.93517847539409	0.905438905486734	0.171488724752921	0.652410691798822	1.32633627766375
CITED2	67	0.733363562145905	4.45314829642013e-10	1.13801538607363e-08	1.54160905253478	0.15097999756008	1.36442226307617	1.54296516340336	1.69876820440596	0.309904361047482	-0.029945303219089	1.89235996333531	0.827970412531115	0.749935681508629	1.21976974078554	0.661150869358383	0.405132088796493	1.3769540492488	0.479169602838157	0.608135288638849	-0.0575881735824385	0.656123755529993	0.480890252996758	2.58346219118021	1.00315052430992	1.60924812153809	0.728920812034056	1.43322462194349	0.891515808409654	0.345488909439792	0.312217807881884	-0.177636104941832	-0.504222000976808	0.115162822785992	0.146286761765536	0.280483167949503	0.0255467557410844	0.234009355124996	0.459843379374768	0.779539281206066	0.766136764599596	0.633833546560862	0.537574182125492	0.618772689439992	3.00870532728497	0.000101659200638175	0.00199422522264518	1.60896122840276	-0.346886218537911
CDK19	70	0.732865803065241	1.96406184814344e-16	5.00768045005952e-14	0.881196938814935	0.305108397745292	0.837127812181019	0.683941950929709	0.460397545727075	0.910860271149091	0.961402025553055	0.967587037441806	1.06055528572045	0.460294617068688	-0.36042521514585	0.376957383108797	0.153574820172872	0.642023314122774	0.223196003082367	0.405493342458061	0.973494600326389	0.63110288218044	0.429902386575979	0.484493638803578	1.01645590283236	0.848674958767164	0.930858795829491	1.48186081132111	1.80771459115688	1.15548318480035	1.45136176184222	0.543565138520867	0.258624910427064	0.372234116378065	-0.438533036969199	1.00296707430333	1.41993137805855	0.18946156808505	1.23602361170915	0.836518385159361	0.401143439254073	0.479532528711769	0.283085133284373	0.763385784886445	2.3381438543673	0.606764171626911	0.212846347673122	1.61646981220546	0.682560329559788
IPMK	69	0.7318060246946	2.48001445205299e-14	3.0562044764133e-12	0.262155312791257	0.735736231937582	0.68464191631234	1.71829231305286	0.129288938634673	0.891356294804732	1.41560077371288	0.617214680799466	1.38972470411851	1.01518839570483	-0.0574798835382309	0.820509126139712	0.474415022474518	1.46664506311178	0.915019975187112	0.951316566325822	0.712110007115903	0.973985954402502	0.514060465089799	0.619179741282178	1.11564200853845	-0.299196809368093	1.44769231510721	1.65127470994382	0.906954556825023	0.377875141261577	0.759921395002944	0.773519408086382	0.191022640266962	0.708505320337407	0.521294811839946	2.06270730141215	2.02354020296683	0.0412288301590794	0.284442226647758	1.14289746999396	0.721538244948937	0.620565751010345	0.656113408064552	0.0774320348744993	-0.431372991827971	0.924439255583243	0.649028293030915	0.0358943445030116	1.87804068896859
LNPK	70	0.731196719394451	6.68534756903396e-12	3.23620144751831e-10	0.840787308694051	0.628896977703907	1.07364391115328	1.28913399491026	1.52097234161829	0.109971778459987	0.934977909641152	0.937291902808805	1.81193655159407	0.604715633679935	0.416097374595912	0.836276723066808	0.983329443675876	0.347601298067725	0.160856491879051	0.668044458726288	0.328879715526274	1.48038216227772	1.01597656346745	1.25943298489357	1.07836956959069	1.31327016780287	1.47662610665407	1.74246510254847	1.67944198792576	1.23216591929183	1.28781696365569	0.606009615445871	0.659841536854271	0.71122008952016	-0.0750522178391254	-0.506287169462259	-0.548756837144056	0.476687383355784	0.262347030737225	0.987273146437091	0.0120320669986259	0.702211338392675	0.96497862220756	0.53483938800721	2.30081613103785	0.0883150109057358	0.442414489992143	0.162837495002243	0.690169896110469
DUSP6	69	0.73019637882478	7.08388468822798e-05	0.00039583126329094	-0.121577595430498	-0.102902751830897	0.246606230224289	0.91424178864762	-0.348758780776383	1.65342682875297	2.32848869039906	0.800367099589298	-3.14783049862283	0.140329497485918	3.60120567459863	0.480989266923123	-0.503537580437102	-0.028944785889142	-0.143692017210944	0.0154309296227239	1.67647811287824	-0.40790038793346	0.536745559889514	0.574774910849588	1.06506826816	-0.645751062371242	1.07930045424367	1.04094904979562	-0.55011089654078	0.1400064109619	-0.452944495213021	0.0463948080586617	0.185535515653883	0.123618221396719	0.727867402869022	1.13180721053381	1.48002394616642	-0.171101648929082	0.688767658556518	1.65546158495928	0.387137536850701	0.948940416835874	0.528010518375939	-0.345437705072668	0.961344180255802	1.18971442140754	0.858754331770373	1.64028119912769	0.645823630551524
TXNIP	66	0.72617558869588	4.14325125812354e-05	0.000246966322388509	NA	0.367224605562378	2.64854656831543	0.512321989683464	-0.91396790092291	0.899190337115243	0.608234661843804	0.39233933168832	0.221663303282564	0.993259779218651	-1.15794943542518	0.5192500930624	0.525826012940162	-2.77810225129997	-0.37021551211029	1.52114765449899	-1.2832945107672	1.27154719316492	1.67799685048099	1.2268929635997	0.963274764316147	-0.78992657556638	0.182589235042583	0.345212618541905	1.49827286296018	1.87463698984472	2.09539693024084	1.17279351195568	1.53390977166345	1.76238733865953	-0.100809025816023	1.8905551587524	2.58385560264694	1.36360641248744	0.377321887158659	-1.08611843956162	-2.23508821736798	0.383272208427169	1.61691634738057	0.137606371087965	-0.242260449675983	2.06746813183507	-0.00770555507956005	1.87980488303247	-0.432040639653121
KAT6B	69	0.724272792393034	0.000604734418075804	0.00261129430830397	6.00431278910186	-0.164740887804517	1.33520417194632	2.03464536113617	0.950116499148674	0.284363689127676	1.27850288175782	-2.94362768779667	0.494349711021604	8.96636634784284	-3.26301037483052	0.667963346279831	0.433410091196518	-0.056855188543782	-7.60162433578847	0.374080987001952	0.113184971011447	0.502099966264822	-1.4125798458203	0.537296113674556	-0.155369143133291	-0.151041684730449	-0.998799598558984	1.30280701089259	0.764036547844141	0.317866297340383	0.392120900291583	0.315902402144321	0.227855953529256	0.284200159372885	0.504010074260305	1.96216791246408	1.73163118021586	2.49218091487531	5.46193592642527	-0.781184219103009	0.70807555119681	1.22994315344495	6.5372478905105	3.24888690358976	2.51323995752486	-0.21111049112771	0.195158577490672	0.132461364701648	2.85706395426312
SAP30	69	0.723563791636569	4.60652263574719e-10	1.16380279164173e-08	1.57434396537876	0.534627493344235	0.289978888080097	1.3366927060892	1.77435007402497	0.14977067417789	-0.0175751905926296	1.08301655711266	2.34831124811892	0.443600036305717	2.13646916834584	1.35347182107379	1.05474741230759	1.30268003654591	0.710952960076856	1.27352821844412	1.93307923984351	0.958512682097222	0.64606968418406	0.959157336376412	0.808954559127058	-0.000811974452112992	1.39620749170634	1.06332167237626	1.09207594488946	0.88950859878628	0.590468964889782	0.893738538951579	0.789604455801302	0.874771993831182	-0.0590509432280508	1.52961378502098	0.920547214102768	0.0419100765369315	0.137162066268168	1.26525459621294	0.707581030894386	0.299150463733397	0.944034507932519	0.509117814254543	1.62867414047318	0.287684747922998	0.547640742194389	0.821424623335369	-0.164702782899516
ITGA5	64	0.72183905355715	5.22245330521678e-08	7.01662381685758e-07	1.57988777449077	0.420785428691773	0.652649193556522	1.71526749837052	1.25389431617061	0.0734181486058121	-0.185369890149582	1.3829049011057	-0.314587937820015	1.10657786486176	0.653497012922731	0.208547010375511	0.744269111300324	0.113634289459722	-0.0356055579565298	0.0377304493087667	-0.242852677031507	1.47577260388419	0.977028415945877	0.47393074014944	1.8226440574251	1.17190870001517	2.55857938555378	3.30057350297899	-1.05124770454941	1.56390910523032	2.18568075565763	-0.528291528179428	-0.742009913492541	-0.628384085474143	0.00906492876388221	1.32685819720162	1.45284328403046	-0.238638912442095	1.13523174552898	-0.270456446445608	0.136684758586495	0.667089940656879	0.922078049064592	1.25053887700277	1.51549077181814	-0.265998969280169	-0.0840419947917343	1.61414248273199	0.0206861882963087
AHNAK2	66	0.719014637989139	4.58110243961325e-07	4.58565046550095e-06	1.58314929652991	1.06902822133393	1.58468719402178	-0.0310373850360517	0.839645697497891	0.300608161360498	0.256524491496184	0.780653812015237	1.52612072637878	1.00129421920881	0.737951680888332	0.647639371596027	0.63235928721162	0.459726916990764	-0.251252094463592	-0.646764005755987	0.0947791601322671	0.660492638729517	0.893063104219391	0.872121038039792	2.01898273194089	0.627565100439698	2.74763122839983	1.55676456186245	3.71134187020229	2.93481003182164	3.28830946095808	0.233661302817421	1.14899977881167	1.87316607067414	0.872334092144614	0.59111982495126	0.217351904918039	-0.343182313288231	0.741291560529172	0.0826580073658457	0.368875606772711	-0.601818187518137	2.85563520969252	0.502357568203697	0.899726262628541	0.121939437248535	0.100001340250319	1.32424671122517	0.777025635390875
TIMP3	63	0.718044754405511	0.000762759890538561	0.00319779623737032	-0.656785173318403	0.307140311142518	2.47717687063161	-0.219761759844006	0.409580793206289	2.20505753210962	1.41851995998574	2.05589265265368	-0.197508878769819	-1.09032126610928	-0.638524834833661	-0.566584327925105	-0.49360449678358	-0.427661994918323	0.02690010370782	-1.46934184632752	0.854350682537715	-0.102824132506126	-0.122999257725951	0.887796593285738	-1.53489277027206	2.22108599679833	0.042773281015901	-0.0922153284548897	0.0676421846888224	-0.0569243213230471	0.418136187605947	0.207171346172706	-0.119130765054518	0.163312597168223	1.48763655405962	-0.458028055709476	-0.270537199006096	-0.337809908356099	1.80469320296454	0.750957074216187	-0.445064334234108	0.95626132460621	1.18982933285222	0.538296715307858	-0.0345114472399712	2.38345895217125	0.317694165389699	2.56187592129385	-0.431750149205208
ABTB1	64	0.717472955120551	1.17719459868337e-12	7.20156566517054e-11	0.781162816744463	0.845465484461497	0.320557728106278	0.415231210513641	-0.0370326633545611	1.15673023771007	0.566817109941419	1.73712245771468	0.244068473199364	0.975022938215555	0.945109703258784	0.299370580012222	-1.11303163863958	-0.0615299437571381	-0.110462723571736	0.617012299131699	-0.248780574557382	0.985354852900911	0.558542837734758	0.823292357980793	0.709340783118013	-0.130247035223389	0.313555532740284	1.11305738087378	1.76657026220568	1.61890324842832	1.25783214655552	0.383076963628415	-0.8054691042402	-0.157812593572951	0.24858436640001	-0.419031117550936	0.175546197886488	-0.0964390860020791	0.778033875174497	0.539969707610673	-0.155892932235968	0.183204995479755	1.57958322362115	0.550084640841236	2.45679665690462	0.408991977128238	0.145980934712689	1.8363774613742	0.911126156228402
AFAP1L1	68	0.714684083578096	7.8745091889473e-09	1.35300048667102e-07	0.808180230020607	0.106339905950862	1.0853687171437	-0.0163734415998454	0.834404476635886	0.86381291252915	0.21470699697425	2.12913797662611	1.98071570484003	0.677665650389618	2.64852809249228	0.328116319355318	1.5856679760644	0.533325300623723	0.124484744011798	0.297156254541639	0.692207300964954	1.17209976550689	0.267055874996671	1.93717161259478	1.27939727278622	0.866996211609093	0.0880332801567463	1.41064145318344	-0.0761403733483309	-0.436376549328285	-0.0266392165429202	0.09787013728407	0.724055323332725	0.556923677404483	-0.560156943172274	-1.56845099055354	-1.5688832837283	-0.143022485269325	0.0144689537979548	0.250390807526528	0.323151354242606	0.121071440536269	-0.00213263643057491	0.400238359335887	2.9021395825501	0.850386005830054	0.286524440123381	1.68679881288487	-0.370164525057107
PER1	70	0.710677035726497	6.98610118680389e-07	6.6738026066186e-06	3.69184299438066	0.333249422907805	0.508152207936497	0.433665750356989	1.78453230027887	0.00898563778084744	0.558585494230192	2.61953436500305	3.00052459544663	0.578137879583265	0.432271565729787	1.15200734568836	0.791554375796835	1.06590890185707	0.309753875046128	0.784473629412589	-0.571633200369523	0.570196058401877	0.386136031905955	0.162066155414496	-0.209204372488749	-0.149839996244788	1.91153212333388	1.86709059629991	0.564628658388404	-0.27281211045188	-0.101038461719802	0.0223854072556125	-0.259069011255598	-0.328020700775791	-0.685246863190431	1.23411425566879	1.38883088531153	0.199583901572824	0.172109385517719	-0.244184576895832	0.978427688864519	-0.133116284153834	0.684085469349163	-0.320358512567589	3.66510044545388	-0.194267975074959	-0.0689387365719104	-0.194541787138135	0.7011728544938
KDM4C	66	0.710184485058908	2.64308940415801e-13	2.10139817788649e-11	1.83737513651377	0.334143855030991	0.769260782581457	1.13355739659837	0.824326186167215	0.268053319896068	0.48827944304035	0.982663175690934	2.23989855493785	0.876999314587582	0.716816385467483	1.31192325185789	1.30966324389462	0.535947193273322	0.225587173963131	0.366504994807042	0.737026687421222	1.08640888715159	0.334225296969233	0.611666624037849	0.766532849491475	0.73893279293385	1.18596176327212	1.37695594630632	1.1695035940661	0.932988134988618	1.00348400528041	0.568771773480688	0.667740248996601	0.601501236098674	0.190814704166849	2.11678651292318	1.38060809599178	0.50348862311549	0.277048567592777	0.704004989730314	0.372382144236658	1.04161350009403	0.365999379132717	0.200615149232797	1.11853008978018	-0.350163265003029	0.162882858252512	0.618719377234392	1.24091821968153
MT1X	66	0.709432959249933	0.0018218529273603	0.00685884956461407	1.13760407671571	0.741713337117533	2.01311352278737	0.207960396396853	-0.794711048703825	-0.663083559973119	-2.57251170933703	1.80799839868374	-0.540921854489608	1.87506248177573	3.90170517880265	-0.125362242304759	0.156463652189466	0.386421784222421	-0.201757366321383	-1.31309890541013	2.6364352439451	0.664800269910027	-0.0430339265859509	1.25886002065813	2.78567073161407	3.08643628287224	2.54909381916107	1.15122039292142	-1.72295805930709	-0.270701112644966	-0.789093474046141	0.760421496349708	0.923746917399411	0.67609611173915	1.31917131939261	3.93046149578493	3.32029718182188	0.237428476983625	-2.20389926045028	1.83544143427156	0.0942710988421181	-0.895447417588484	1.20267316360923	3.70066983343876	0.993311631557146	-0.464063531019875	0.0871778575020266	1.45827305179609	1.69733685184757
BCL6	67	0.709183201285514	4.8623909070353e-12	2.4513080704513e-10	1.77291941343357	0.70216341666871	0.252520834773956	0.727541599807096	1.13232891493494	0.397634944041867	0.690736577758119	1.35909675394299	1.30791667828406	1.00398422417043	0.902498064494222	-0.342062219056633	0.309370528706263	0.902655095274995	-0.0215652024363207	0.20306731489784	0.00403562321125694	0.133026806269255	0.306464813274286	0.0702445827805344	0.545306904859554	0.678672845551051	1.4574478905516	2.30948224023114	1.75240940866788	0.993616662138	1.21531664688895	0.0407751891989305	0.14409770660891	-0.133753411127413	0.0335403215955383	-0.595538986659491	0.0757466841082046	-0.987970332836807	0.564997251991023	0.15517560066706	0.592963854292814	0.317828191923356	1.89738370366032	0.253327192795356	1.9398907037411	0.147586975934382	0.110397637243572	0.104295073570475	0.769689045714381
NARF	70	0.704083896587324	6.29843932210203e-18	2.9106662717264e-15	0.905133570716584	0.91618353564511	0.482775372373006	0.458172478233735	0.954020840583156	0.698359842899715	0.152728652000374	0.332119171617756	0.937045116095012	0.25138009877252	0.656615245128463	0.247073717335277	0.288218083081446	0.153213355741582	0.265500572196454	1.252715833184	0.927045847399392	0.681509974136933	0.359953314431045	0.460169482731324	0.486088335677221	0.223545584094533	1.452591667547	0.63395005174363	0.935536978087667	1.73465102680427	1.09991593174988	1.44361245987293	2.07452258916069	1.22965334093327	0.0440501748877176	0.42007706537819	1.43761172427055	0.819137071448938	0.965635745487427	1.24695443579835	-0.0634925288129897	0.697430835404307	0.895010530748277	0.745046599930006	1.63991786083108	0.905892550563214	0.72295180067421	0.135990081326647	0.66633820203474
EHD2	65	0.704083145705307	4.48144306526087e-10	1.14261344912203e-08	2.0795328511228	0.794544836700934	0.51728205494428	0.448395103251092	0.610689052569055	0.272594377700093	0.0884394197067629	1.36570058411122	1.05949096048744	0.540944231338916	1.45809411496228	-0.0864325060286577	-0.119419822429056	0.229581295022904	-0.0434831462318149	0.562532926481913	0.644658482955437	0.584164174508096	1.02139326927809	3.09282076202026	1.28407790088512	0.577270883222379	2.8093771652607	1.45690131719613	1.23526249207929	0.940478842263334	1.12276752434453	0.159263671842339	-0.631639232295084	-0.135749516401767	0.0108955816285379	0.662744343557152	0.913565308621786	-0.191801548452524	0.75165461225452	0.377110312354901	0.213163675974777	0.459029607412356	0.982832457330376	0.96781867881402	3.34903040256562	-0.247096741915257	-0.161298651076836	-0.431179114961626	1.01142720251212
GPR155	69	0.7013376940026	1.81902741447079e-07	2.0492466281255e-06	0.797862935198587	0.333334432886781	0.710174935092951	0.475060574842577	0.916421619013768	0.189418205251075	0.76825370259806	-0.627458840494757	1.34168158685321	0.675237600067626	0.149538526750112	0.670785322468795	1.09484714330181	-0.0832239440233738	0.494175076531853	1.22662330592307	-0.382259989068982	0.95163053149359	0.960025347637886	0.607919679494808	1.85021231254147	1.17401499002531	1.34165994777618	1.05345324099806	0.600187027498337	0.661816387970881	1.06559169173399	-0.0537609250009892	-0.0748971214142949	0.12005086178412	-0.480358390927931	-0.0149766225642733	0.22506786946005	0.499678219256176	-0.0382862346034054	0.0686306956232844	-0.179541916018818	0.0460903942278513	1.99478830787827	0.791096139663593	2.26754767265298	-0.0308060892740435	0.155098689806336	1.60422812269664	-0.316175493604412
MYBBP1A	70	-0.70004645414511	1.28364375433331e-14	1.7576410962112e-12	-0.514982012243845	-0.398005277374307	-0.482429733560488	-0.905172365313305	-0.540272709194676	-1.02797833405114	-1.32265760290421	-0.648538032956805	-0.937275871368391	-0.30247154300905	-0.0102940860642858	-0.102846935704166	-0.0158684575902004	0.00410599110227116	-0.114055841161559	-0.549553176602767	-0.898185731295535	-0.318879293970687	-0.50256264728045	-0.255420331053837	-1.27272997300414	-0.589306824846138	-1.04091046361798	-0.67464988566449	-0.815774572129062	-0.751600780703683	-0.696084399771179	-0.148465735894597	-0.27758456757533	-0.409012050722131	0.330539211535671	-1.16552091280106	-1.07271499568707	-0.0797119611059907	-0.453158085943847	-0.440422755785759	0.0990072287169994	-0.282974231789298	-1.48642020376655	-0.868376029641722	-2.43077208507647	-0.362646270861754	-0.0693113324616717	-0.814638122516601	-0.980235295081387
UBE2T	70	-0.700807267542516	4.34891643044181e-11	1.59979542719834e-09	-0.377032544581947	-0.235930988566219	-0.794223167652439	-0.442001550927317	-0.254748700853984	-0.513527146192924	-2.23681129023298	0.0597346372774734	-1.59119062774222	-0.765958745761318	-1.03999796190183	-0.658193210384712	-0.676275404311534	0.0634785019990833	-0.137431234927049	0.53362688463486	0.155255132882387	-0.170889754317104	-0.405900469586928	-0.55597240056831	-0.63444127346977	-0.827489103653417	-1.22112194331548	-0.489681863081511	-0.680925633361398	-0.405422060423175	-0.679356004532302	-0.454442111084637	-0.126272204528772	-0.0702699660098861	-0.313355779527916	-1.9613473761834	-2.23135731186047	-0.0664639624069428	-0.82296136715086	-0.0658271525963262	-0.0434613895441872	-0.594995655763038	-0.080271320895634	-0.150171456926866	-1.74723898996275	-0.0734720672654967	-0.0271903897788998	-0.913559178386066	0.164558696605718
DTL	70	-0.70278537221025	2.0881792396831e-06	1.76457111979621e-05	-1.46701828415236	-0.168077999633433	-0.292097628335652	-0.114138500495683	-0.269506809329455	-1.04628358720016	-1.95041398396451	-0.356174557952287	-1.6618068860572	-0.581409766825151	-4.13018899064029	-0.35500908383487	-0.837526758144557	-0.0305944655335694	-0.485344162536252	2.05183358199586	0.967001226711945	0.0747317347904119	0.174917512122996	0.00906025676426049	-0.269996370452441	-0.98274214932882	-2.59091442535595	0.361332961744618	-0.656325006738419	0.0453416211707338	-0.499667102337577	-0.581727532475089	0.419335218938594	0.327135695887821	0.50953530629036	-2.45596108357307	-1.80336070976201	0.0059281892060509	-0.70564381671451	0.71872008129859	-0.106580255952638	0.052716698646834	0.387563936908144	-0.402598977842032	-1.31342907002728	-0.0629511423680061	0.00510689241190379	-0.549440037925164	-0.200123586765545
ZWINT	70	-0.7041094038573	2.40546700991315e-07	2.58823464615003e-06	-1.4168957214201	-0.00148246780756523	-0.599891305441204	0.199091214234782	-0.112959573052164	-0.656035377910866	-2.40006392967918	-0.542906967297199	-1.86626511944853	-0.578068704058944	-1.89415108700755	-0.426037809791997	-1.1599762442694	-0.0400176934567427	-0.145363965756638	1.79484395203109	0.379966587276343	0.0520925882582702	-0.0724285982406976	-0.209251396488916	-0.388698076731337	-0.98671709608476	-1.10782450771304	-0.49544489006672	-0.852200863692551	-0.270062349130972	-0.676541253200888	-0.327550422686298	0.0785161822452578	0.189586616863441	-0.167937408591928	-1.91030015244716	-1.96140711037777	-0.0369449971740727	-0.583485322541887	0.682040550828026	-0.0661063949519324	-0.284396197703701	-0.261257305993581	-0.635094726957148	-1.34034421081823	0.0787650695145172	0.23146444730146	-0.898387212037511	0.118425856999291
LRR1	70	-0.704845413376743	5.13866148508528e-13	3.67696093748909e-11	-1.32723803256634	0.0549981385289379	-0.605284148163524	-0.118782228389663	-0.00787954174767771	-0.646352271905374	-0.989549111503905	-0.37652889775126	-2.09797928764153	-0.516640005832726	-0.688444025317492	-0.266737666179872	-0.727614295749573	-0.446911977928047	0.00853964867915944	0.564485289048665	-0.406733001267085	-0.147037548402855	-0.294845032330354	-0.65056340931296	-0.300458708777917	-0.911839397686961	-1.03835871609905	-0.61995422879174	-0.925899347201913	-0.53653252699442	-0.640412299752967	-0.640454010557644	0.0887403449820484	0.261169824377003	-0.0671574337985913	-1.16193549481958	-1.28489036496963	-0.170224574238407	-0.830381597384935	-0.30040246919219	-0.440792223512622	-0.601507284372603	-1.01268512196723	-0.58970012853625	-1.84989257607715	0.169536177405274	0.130779723980657	-1.52304430088493	-0.430981282977906
RIOX1	67	-0.707666293745214	1.81121751722074e-09	3.74082187774585e-08	-4.0820443686526	0.0824546504952845	-0.0696491061239007	-0.123190176606516	-0.170000486763274	-1.04360301740357	-1.52479601494611	-1.52432840667997	-1.55747323683792	-0.547615667236309	-0.451381595980778	0.0493807973576256	0.0607414250690956	-0.0342706935499144	-0.273336914045904	-0.892196950931892	0.0122999693050733	-0.251783908504173	-0.17898025675485	-0.279430072763354	-0.634118404410697	-0.830764514413239	-1.62818630453	-1.5403766387668	-1.34327638609001	-0.677946744208158	-0.807835149618821	-0.59772193803639	-0.57925592047765	-0.622685772428259	0.393436889266285	-0.821579457103529	-1.03882171826694	0.0669609415496868	-0.362763208671786	-0.451390414292651	0.160506941518044	-0.193720936636649	-0.995382195514407	-0.597715977532378	-1.18475427107311	-0.0428636129364374	-0.0646930251176853	-1.70317918041713	-1.67994248058944
KIF23	70	-0.71125508326949	1.13131213288242e-07	1.35281755965487e-06	-0.608405485271863	-0.122732673892685	-0.73034467369584	0.182412867877949	-0.0331068268566132	-0.345974535859111	-2.45488707527147	-0.639892295573016	-1.82634953316391	-0.324328931844565	-1.84728897857549	-3.6849900506562	-1.35525311683333	0.163943002147665	-0.0879435258197721	1.34585281992817	-0.13797391829093	-0.406483734911734	-0.544973668391823	-0.386836145139483	-0.338496454569908	-0.837292150972361	-0.473417837800197	-0.668373002761729	-0.834538566088388	-0.479548305785685	-0.648846782297064	-0.300329963486285	0.280328342743675	0.249802739369741	-0.0963292684235998	-1.50595227339374	-2.16194434637937	0.409410259542076	-0.669085324277943	0.0159137588678068	-0.251851108386122	-0.305254611124793	-1.18666147051404	-0.359795448446899	-0.594574043209049	0.0175650482149922	0.192272270344843	-1.20743629152407	0.0896298524749711
ERCC6L	68	-0.712743479310337	4.95247912667503e-06	3.785523500617e-05	-1.34716327922364	-0.00515661451372485	-0.536629208626507	0.235734703177308	0.204625235668835	-0.388288472769782	-1.9894625938436	-0.766941220502421	-2.32837937421092	-0.566121679966368	-3.27302860032259	-0.922205010049538	-0.0625886461928505	-0.50987134780073	-0.0556413978457542	2.78658490575037	0.443512497031975	-0.117047209541045	-0.407467888020896	-0.326683532785906	-0.229442163153029	-0.761196399195332	-0.751724738389547	-0.699450230814345	-0.863892394753856	-0.510365149176385	-1.17226425623464	-0.524495925123701	0.0285034989949838	-0.138091572661813	-0.410677850005525	-2.77080081809681	-2.74591481746423	-0.0141198146250467	-0.64171925773918	0.483231385842062	-0.477276727431722	0.0195279353315043	-0.462328671908771	0.00896699437202012	-0.505505106621488	0.160099029689089	0.128414834049247	-1.14608368202924	0.940871253416763
ATAD3A	70	-0.71294575786605	5.34058059188659e-13	3.7538182125744e-11	-1.07298448876672	-0.382572165854648	-0.70378834768271	-0.758867329898672	0.0885355187844179	-0.654509517367199	-1.69159310523949	-0.651056313615888	-1.03531701457892	-0.112516837149771	-0.534131617597962	-0.102514524378108	-0.345297411252208	0.00229427384713035	-0.0899137462433364	-0.320844141792986	-0.479258582161569	-0.425083067093231	-0.461537771292273	-0.123026242977592	-1.30066429934954	-0.946517348985443	-1.50525147737246	-0.864101418400281	-1.04678532896268	-0.954075391545801	-0.826097480276511	-0.383036436964998	0.019304480321681	-0.180236417279165	-0.213456420194753	-1.62712670399706	-1.55436798509874	-0.15559733196542	-0.500391386013944	-0.524275977599594	-0.0214987480587424	-0.328468378126959	-1.4998709510108	-0.801657633094076	-2.09445594651808	-0.190492958164616	0.12561515365583	-1.51631883495897	-1.09514175746488
DOLK	70	-0.71418383241063	1.02959950279961e-12	6.41533038514074e-11	-1.89669425274679	-0.0791618206290535	-0.0413419529724071	-0.759599712476711	-0.273940077603133	-0.719194132516493	-1.30788095309616	-1.41258397334621	-3.30992827955046	-0.799805307620988	-0.548362518949992	-0.252861936086034	-0.169219966423696	-0.651543854373883	-0.279032385803935	-0.958212254351966	0.0229899408919599	-0.390948499984935	-0.399301969175095	-0.544923744015641	-0.697427746825736	-0.593422222858399	-1.84639347305246	-1.53612769579042	-0.982020444386048	-0.685998678904553	-0.9845029380102	-0.23274696907981	-0.314989250428865	-0.473775571071924	-0.0741326856368311	-0.109265296487225	-0.186272628045021	-0.344009982390471	-0.554771981355756	-0.268732323426289	-0.601574257575268	-0.384938079732607	-0.625748506591272	-0.583369633945536	-1.90676829360607	-0.27537798293399	-0.0691267362535007	-1.47593121811355	-1.39283077389109
METTL1	70	-0.715281220346058	6.50200092739679e-13	4.44240983157424e-11	-1.90396664100213	-0.30834570782617	-0.0263984708255423	-1.08292510291483	-0.95656240720638	-0.681996957388141	-1.48829388957002	-0.21115716922876	-0.890744478488434	-0.151727328749702	0.589768490595073	0.215560289444874	0.207720062871351	-0.113732260370947	-0.234477991579481	-0.645558530418244	-1.14650917199329	0.171754296853432	-0.428829338492827	-0.136358807781009	-1.20344459400067	-1.02390005588687	-2.61083834763967	-0.638219958279993	-1.47316289056223	-1.08994683631409	-1.46690969096604	0.0126554537801716	-0.0336663868348295	-0.353106832248665	-0.271230021444036	-0.426740713346223	-0.69119101403714	-0.121911727169074	-0.591641707998139	-0.836145800522326	-0.0733472994248743	-0.767608459583557	-1.85039702120713	-0.887418097008663	-1.44074368131522	-0.546401869890694	-0.136701032637179	-0.754627933874491	-0.91019871693624
CCNE1	69	-0.715482582759534	1.4192216667745e-10	4.32433722697693e-09	-1.28730481283248	0.435105897421141	-0.399476352462111	0.0206287554369316	0.145850488847338	-1.40000277028694	-2.06498242381592	-1.28524814767921	-2.05947240035991	-0.716620888841614	-1.02088743344096	-0.574811347737847	-0.482114628543729	-0.314156184809079	-0.530190433422528	-0.311307292953158	-0.0400297066547244	0.141200253734639	-0.0147344777077367	-0.361496994819047	-0.407739213859562	-0.541184041538872	-0.488676028509012	-0.56433950567414	-0.877953574556223	-0.139965570570838	-0.64755141161028	-0.315645016439485	-0.120626930444409	-0.302124329577342	0.874434498805565	-1.45396971970115	-1.1061617552512	-0.0937113698802812	-0.617360611468009	-0.254672312990345	-0.260269433216284	-0.030416539947489	-0.498936239086924	-0.0564494734259717	-2.79048190003266	-0.553914587666546	-0.252916733318548	-1.0588475583071	-2.30783103198953
ATP5MC1	70	-0.718580698418398	4.42338807364482e-16	1.00122034948561e-13	-0.58455325361361	-0.157489693937674	-0.789243854741178	-0.623570918088388	-1.37239310045464	-0.301282105122538	-1.86700645178929	0.36306536401082	-1.07421581773538	-0.944480357410218	-0.262634075340862	-0.724065724999614	-0.549932686232451	-0.20457058699848	-0.0793060240520605	-0.492648896300922	-0.100723011700145	-0.292402438955448	-0.627691255080632	-0.578300064526729	-0.854309795137856	-1.34147970872841	-1.55871407000362	-1.3313762243762	-0.912125825771034	-0.730192804244358	-0.921516824124914	-0.113243535372117	0.104844218263669	-0.472623374059691	-0.31067930108056	-1.81411526753208	-1.7400150582773	-0.130416435673943	-0.758533897601966	-0.156177234428315	-0.23098135862593	-0.93416170958724	-1.26978965877329	-0.367013326791759	-2.01561848290815	-0.245861154946023	-0.0128497770450416	-1.38512542066879	-0.284050579882637
LOC105370333	67	-0.719539045102375	1.45139888325746e-10	4.4042311940379e-09	-2.78156998523214	0.0647917796424331	-0.583289921214674	-1.20734922776187	-0.891302319001812	-0.635531857582338	-1.65047250350368	-0.938034178195096	-0.853294943805262	-0.741537689990274	-0.700768188784363	0.273311481008417	0.262548745460035	-0.068313427609342	0.0313500679493731	-1.41395294822857	-0.197340176986382	-0.601317259827628	-0.346967123439758	-0.993883819540322	-1.30055296642407	-0.881228712670241	-1.45518481526537	-1.87773177122385	-1.02740247921477	-0.878730131112563	-0.642614331366892	-0.213694003263037	-0.268596784841077	-0.180793477656147	-0.175866297755643	-0.149724215164955	-1.28601154387035	-0.0988881306759749	-0.856995608252491	-0.578124521103394	0.0776600719826787	-0.571077924649561	-0.912922583643348	-0.917251175384202	-2.0499440363475	0.0946250912443601	-0.105195013450804	-0.876535116430335	-0.328424029382567
HSPH1	70	-0.719555132052115	1.87328486283968e-09	3.84040710050923e-08	-1.95951493551004	0.892206340164012	-0.888109517579579	-0.094861220676746	-0.388771594483996	-1.55743993651882	-1.44942373186997	-0.711090801526764	-1.71734702389546	-0.444450796860545	-1.56494955899936	-0.0254189384000468	-0.220648509065825	0.0710863063062954	-0.0943065440226022	-1.37708107845213	0.0739300657311099	-0.701838792803324	-0.684155531419986	-0.430765204477388	-0.737607470009062	-0.0571636986339898	-0.54035974566976	-1.4051633932974	-1.02822464324454	-0.562658107269195	-1.04966004086769	-0.153574077274985	-0.341833458647132	-0.718803364274168	-0.665603689532162	-2.01750326393319	-2.13543089570633	-0.0126276050580863	-0.334022621256888	-0.312334604742677	0.0414906389204855	0.715112111466398	-0.821012338700648	-0.0211672784768961	-0.955540487167389	-0.461001200296859	-0.620652203115121	-1.38799759831203	0.558667521581347
MCM3	70	-0.722314758363743	8.39941968569135e-09	1.43209782834747e-07	-1.40297139025993	-0.44676398139549	-0.972684977900678	-0.243152837255395	-0.0360725043027265	-0.82015793713945	-1.81221661041858	-0.83528808747066	-2.00579918128601	-0.993107197245615	-0.530606131951845	-0.719752893306532	-0.96352947870908	0.156539515307671	-0.236777671622701	0.789877280012469	0.519606451346695	-0.0269265482310124	0.0376120723669057	0.205387398299625	-0.626113744584543	-0.807914765622485	-2.08767034848177	0.0228725975346483	-0.239640587714457	0.0520678146259873	0.00469438454714912	-0.0886028470296118	0.439363530491892	0.337466501577684	0.436335712724324	-1.68290009073454	-1.32017885193307	0.0210785992650364	-0.715877066496948	0.211117268398558	0.0705786547018951	-0.345435222245483	-0.987670831905942	-0.398776871223344	-2.96464332369277	-0.315698746401679	0.092326216492663	-1.25349305714227	-0.555936675981401
PSME3	70	-0.727793995989715	1.60991945825311e-16	4.40879424974945e-14	-1.58470319282498	-0.11997723839427	-0.457544285259542	0.0864819693174228	-0.0197015277921213	-1.0543916619366	-1.61319104057849	-0.722432299464887	-2.05201153351421	-0.446840968816407	-0.858204722294805	-0.0880699891431608	-0.168287429466805	-0.27562667799408	-0.168951900870742	-0.668333199040869	-0.54297363664339	-0.266233336273585	-0.659366994571574	-0.431919825410806	-0.630827950553555	-0.639601092374508	-1.50160116440542	-1.27242419312696	-1.24542860336825	-0.714638617716955	-0.984503772897505	-0.0253855454392884	-0.209900487906727	-0.456652243190213	-0.154168285398574	-1.42020673443067	-1.50110054993581	-0.0827509577279106	-0.725484367944584	-0.255887425432783	-0.224788800507117	-0.138742254200634	-1.2814873242869	-0.670894558378782	-1.99811946590455	-0.166176638021808	-0.00631311808515527	-1.02405794237211	-0.91402784240663
MYBL2	70	-0.728735684507979	4.20780845792592e-07	4.25810251887375e-06	-0.846194015373793	-0.277212633115562	-0.697055020538418	0.457329604630609	0.0904334984088241	-0.2141783028662	-2.6015291943916	-0.414342693766293	-1.88036161309819	-0.662697972475913	-2.93064912618983	-0.566375026761704	-1.34161223439558	0.0561124699169408	-0.221854195627284	2.34988240356962	0.496540979387518	0.0301201081326638	0.111697950374482	-0.0496640191627721	-0.246605392406023	-1.1114246447012	-1.41538108231153	0.293077191949674	-0.756667999274271	-0.680312331451785	-0.438147543317149	-0.790329720202205	-0.174193189781533	-0.0876250323068806	-0.744962254464523	-2.70099181647344	-2.67712241455362	0.0173255841776959	-0.23101322808611	0.215708597194291	-0.143747010959384	-0.239467975168119	-0.345324033207262	-0.431714154296578	-1.95669154256964	0.199541247589731	0.176210259545166	-0.681565774778899	-0.395506886080003
RAD54L	68	-0.729472043646944	5.93246364399053e-07	5.74645888868986e-06	-0.207549753651627	-0.128516392797574	-0.796730345480194	0.322304317909741	0.281191720965024	0.276693426373922	-2.55493959541302	-0.919041203679921	-2.22643197453111	-2.02892998146804	-2.53517479619057	-0.466901305571053	-1.0539996952408	0.00842114201734669	-0.257406685317575	2.29199660452753	0.61367589816931	0.131878087320777	-0.289056778713976	-0.424069016110714	-0.766316015114372	-1.90790481656558	-1.59026038327763	0.281501522042493	-0.804442933830041	-0.499773896752076	-0.553515324684991	-1.33308792024604	-0.198942650707143	0.190571374363868	-0.757503573347175	-1.95747969874417	-1.94804400907721	0.0234430380009815	-0.26033494319386	0.516729429548597	-0.127488844199451	-0.462290751366631	0.071369251707475	-0.164057265180667	-1.80276282908725	0.0156204015371961	-0.00175326558347327	-1.01412109498688	0.580024664846893
TAP2	70	-0.729511981321797	9.99184116002203e-14	9.35185740977252e-12	-0.472343316559323	-0.161720984746327	-0.912907261276233	-0.332675800438007	-1.04821096852799	-0.747108791944173	-1.59824037201763	-0.299915941227516	-1.77646693889332	-0.760502092285246	-0.993248410767603	-0.583694193249721	-0.808426309849779	-0.00344935841143492	0.00501378344836796	-0.798573735894748	-0.350604106232612	-0.533324146817465	-0.30743995317584	-0.649437228414226	-0.882530896900535	-0.873543253146466	-2.21239533787595	-0.550252948770632	-0.28411714300658	-1.29255148404511	-0.713421004101124	-0.182008892346054	-0.653319964814428	-0.334904337919231	0.0980737299298305	-0.139024162969895	0.122977970933128	-0.0808592096003125	-0.881108799415207	-0.189500101631895	0.0783556189771335	-0.154763927569247	-0.634108700682412	-0.660299650851714	-1.42376219686476	-0.122829927475166	0.145696671820215	-0.81444073615158	-0.15501110807137
PDSS1	68	-0.730512453313728	5.02269685746138e-12	2.51497656190087e-10	-1.12770820437398	-0.208408506776435	-0.498818631845067	-0.377417896531364	-0.423277908979271	-0.653034674808601	-1.48077561904638	-0.670491112821617	-0.703247086829241	-0.727699514287158	0.377420022781836	-0.0527185228534422	-0.153463037283576	-0.0926028900007175	-0.10522450422812	0.114657657288097	-0.00640291491204195	-0.251316115380758	-0.306665970392136	-0.122999130430978	-0.756279578071194	-1.14596373736432	-1.03829613638777	-1.74571929329011	-0.577635753128837	-0.767969860213125	-0.928950085991104	-0.959435932575512	-0.740497178674063	-0.919163292850356	0.980506816754387	-1.7048253130942	-2.09133275345639	0.09974151941999	-0.809212385637028	0.200730919342182	-0.00830933623225791	0.238381707927253	-1.26196934965857	-0.79633116250856	-2.29119034134204	-0.244366112275729	0.0444946867361933	-1.08666443136086	-1.16085755488403
MTHFD1	70	-0.731989396349369	1.04109926070659e-13	9.57074394248932e-12	-0.579487695517646	-0.379070655808388	-0.864430929025181	-0.331887735855316	-0.443500289035326	-0.664589327295647	-1.57214121106375	-0.73728163349615	-0.714939836946497	-0.772848205448295	-0.0211055778507399	-0.793130482641586	-1.05077753706273	-0.0230870110034366	-0.123456145791782	-0.62172797041596	-0.125184083672604	-0.143530268030548	-0.287531166189345	-0.196534417650848	-0.790335704998898	-0.69668047286948	-1.38988277663447	-0.276117693560429	-0.875981433117917	-0.919112435634387	-0.814529366794676	-0.201642582798746	-0.0749086133546949	-0.194959559380119	0.0878337890408854	-1.81938712791727	-1.65998792842046	-0.143937628741365	-0.563963105575666	-0.00117899877975354	-0.0455489005198298	-0.435014596671224	-0.983537931928682	-0.36756717826332	-1.75594346499286	-0.141326111869423	0.0905785735115959	-1.11382594848181	-0.210454666462736
PIK3R3	68	-0.735540532498267	1.1644975995073e-06	1.05003600618987e-05	-2.4220904517696	-0.0695735237622186	-0.0273907328699566	0.00726529248592968	-0.158173898752656	-1.31889616783297	-2.14296863123283	-1.13839568781326	-2.65436820517439	-1.51852885840723	-3.76878667502787	-0.119482496828657	-0.397924762632246	-0.984387723270963	-0.336971952757616	-0.546608769363165	-0.260253193597811	-0.103913187518426	-0.334577638079998	-1.07012790612068	-0.531781834111118	-1.37339063234117	-0.943497160374551	-0.0477741068636828	0.676886982243425	1.24932377164976	1.06594356813937	0.505599595792001	0.565960536667594	0.45553440129188	-0.427503797575741	0.690338682541457	1.29384738550685	0.112735043221636	0.222521495459474	-0.20568236679813	-0.665871873407354	-0.227421733230336	-0.115754340307478	-0.820529362787955	-1.02905897381985	-0.0236314625430147	0.151651438810783	-0.834778846680147	-2.43159984732216
PRMT3	69	-0.735676864795116	6.99818636877562e-13	4.7005994435855e-11	-1.4982484304985	-0.582132871335377	-1.30434662606068	-0.529820951212103	-0.632377152741792	-0.919411581014577	-0.625874417269413	-0.279533933077758	-0.900127795470127	-0.310515600129502	-0.336225275630554	-0.316878313012149	-0.479498950324605	0.130116604622289	0.000780495928765037	-0.782681090448514	-0.917912539521188	-0.522815196096546	-0.683320998927645	-0.484866564843487	-0.947234747776384	-0.885689233222124	-1.08409518430159	-0.658576893268435	-0.951477525492098	-0.421117916653774	-0.630216859471876	-0.0379840060520412	-0.276752565233105	-0.561011918339866	0.794034072376287	-0.172171702975199	-0.561279710048441	-0.12185928443818	-1.03477280813678	-0.861198032319851	0.120624113418934	-0.294038734247981	-1.74301525893246	-0.857380624136473	-1.52322018807317	-0.119514436410517	0.314689668738379	-0.471278966390248	-2.00154398514789
UTP20	70	-0.738370286463291	1.86735572649632e-15	3.51031226484249e-13	-0.846387049532507	-0.280239179823591	-0.545609865866145	-0.616641735872229	-0.469819747080126	-1.06291670504897	-0.761194088468427	-1.16863813691673	-1.94102796250198	-0.588482103308738	-1.13678355010808	0.0762086822436067	-0.0775896382032089	-0.193951331269291	-0.286453691575151	-0.578013235285419	-0.187880812372973	-0.454088497454718	-0.565951572355778	-0.0571862874719823	-1.05785591741505	-0.434211373260098	-1.24443686498408	-1.33223279983614	-1.48919143466887	-1.21586275493906	-1.4224182346236	0.180015271111823	0.124527500376032	0.0707737176337318	0.440868262130753	-0.0580632190367346	-1.04026151853826	-0.0530842294621272	-0.86388798749377	-0.241726835518157	0.0116183763992993	-0.0621761110303355	-2.32130531776884	-0.549891070810875	-2.0707080948826	-0.498412341966076	0.00881729617790983	-0.602432272138992	-0.0681590356431359
NDUFAF4	70	-0.739203922292514	9.58423405730426e-17	2.83463306478831e-14	-1.03626629276756	0.150610323659468	-0.568602219176835	-0.715988574943853	-0.372278973494667	-1.17274900151878	-1.23342792727589	-0.0381218457755505	-0.917418757719156	-0.21316137234868	0.349584061155096	-0.446471131767712	-0.300541623308398	0.0468840400784549	-0.235683156789356	-0.770357346105329	-0.616969877635264	-0.867218662693179	-0.477662958288322	-0.633236318112991	-1.18914824438129	-0.1224670553672	-1.29314716141173	-1.13242938847768	-1.47002016742915	-1.00119097526869	-1.46237821617759	-0.264804776090936	-0.319654504269362	-0.506492081326161	0.337428308429079	-1.18741404019319	-1.17980294260277	-0.0545422360728314	-0.764489485644962	-0.522543508644747	-0.0265247897845942	-0.859558273029737	-1.61086833351732	-0.780524989834567	-1.89632612621252	-0.551812370690892	-0.146174532392731	-0.962451326637655	-1.19887455808447
TMEM201	70	-0.740327951303155	1.2372866580034e-12	7.47290140703663e-11	-1.62091950179951	-0.0480202946205455	-0.42698489752695	-0.233184144828078	-0.0670681460123611	-1.1825131879583	-1.6443357219234	-0.196418215986812	-1.11923454284666	-0.564794435659876	-0.366453733774971	-0.134931685543561	-0.146609339499514	-0.11567329117781	-0.176662009670375	-0.316306576301335	0.292639329763182	-0.197534201417056	-0.249270147516681	-0.420195558299432	-1.26796869577451	-0.740906619041891	-1.16041909903131	-1.11785913899935	-0.785333729123757	-0.510732142041817	-0.472386420816568	-0.478003665218261	-0.104672659147508	-0.19907497181874	-0.0259494579467855	-3.51010068824742	-3.23380742822738	-0.156946019562632	-0.75909647755789	-0.461503694984852	-0.224404209971413	0.0520983433267668	-1.04059110056336	-0.624461143137546	-2.46879038222216	-0.449746400759829	-0.0653584250903596	-0.969255714502046	-0.815314486241604
FDXACB1	64	-0.741373806419814	4.20824130927987e-14	4.71122048835467e-12	-1.67310458170242	-0.490361290201309	-0.609416549824987	-1.14604257446903	-0.379218128566059	-1.29390094730785	-0.928890833077228	-0.211152369969206	-3.10458457721017	-0.783548523978133	-1.09649244817953	-0.563486050168194	-1.07992649898059	-0.554347361289551	-0.0406259309530054	-0.160892749243654	-0.0409076250582869	-0.379743678102576	-1.20530155855739	-0.575690755325938	-1.32116171103772	-0.643158295556101	-0.373973474556607	-1.8259264642455	-1.81350774810854	-0.763701233230289	-1.33000287958326	-0.0629646248436971	0.149275055164964	-0.135563762545751	0.0931239161581848	0.194216231215454	0.416241737242287	0.103417649341177	-0.541293344870777	-0.819673466166136	-0.547423824722593	-0.243235987822594	-1.97644219121416	-0.678079073082544	-1.54807329641736	-0.620059650047029	-0.0155337392895221	-1.29174214418459	-0.990297640034181
EEF1E1	70	-0.741424309947693	5.91117860871839e-14	6.09868669295773e-12	-1.13691282272485	-0.0192316599138334	-0.647788999855003	0.00555057401037768	-0.00348873651104372	-0.943700669209745	-0.855735144828736	-0.237402152492892	-1.43094285581682	-0.411167827452196	-1.4589090957757	0.217266694861861	-0.00012152847142746	-0.0345691831252639	-0.0502315842768854	-1.26493879108118	-0.69608701370924	-0.431807808332621	-0.434601265994229	-0.319009811124993	-0.702636644974889	-0.442470943379531	-0.329534043092046	-0.604282077877874	-1.35994968789285	-0.988128732940567	-1.18219660919177	-0.349274973642254	-0.0957845233013515	-0.0430676654370746	-0.0405648127649395	-2.01761941697958	-1.93777625168829	-0.107693103651168	-0.684662304569611	-0.582021850270061	0.104944952973898	-0.764265315813102	-1.38804778084208	-0.434040627010974	-1.76455167878658	-0.2113687286148	0.0370467117442044	-1.00821412959351	-1.27404542496724
FARSB	70	-0.744012105348921	6.65625047130125e-15	1.00441461193472e-12	-1.11459654981515	-0.630267382364704	-0.563572700261566	-0.49769961199032	-0.214431562723803	-0.731420411390053	-1.37487426336517	-0.735833113373706	-1.02396133908805	-0.237669336892299	-0.560777661103198	-0.0762631779545667	0.256990949372299	-0.0750221283665215	-0.147244147124997	-0.578913013876977	-0.373110322915161	-0.367801246567866	-0.568094017254008	-0.378919319449099	-0.79649941120256	-0.624757620547679	-1.17089949060639	-0.788280378166711	-1.11134034762674	-0.830834950141038	-0.787828403074494	0.146287442777696	0.0569278995357755	-0.273971440544241	-0.188567591748735	-1.9101502212581	-1.87953078480406	-0.0357970047556691	-0.901080319603158	-0.432179625072962	-0.0527851290534526	-0.407260518781375	-1.34567376504686	-0.698098635530845	-2.1517160806729	-0.145000103422259	0.232451585472804	-0.432186576132465	-1.03347929392975
GRWD1	70	-0.7493697485393	3.74480043715196e-17	1.37439596456238e-14	-1.00002546460851	-0.0831590285268095	-0.28831043112191	-0.87211665436788	-0.347698401479322	-0.928620061103323	-1.98658861516734	-0.205340042746972	-1.53938619615996	-0.513486779906952	-0.790186752962373	-0.213124318238759	-0.195851743117172	-0.144388272950471	-0.114858239094613	-0.469221959528818	-0.105812437141196	-0.309823182966663	-0.535217629030248	-0.326779495216242	-1.12403194247603	-0.843289969664019	-1.45213023147953	-1.38757835579976	-1.2850100082489	-0.94930839184517	-1.16097465321783	-0.250810195902722	-0.211208061951896	-0.52332663105385	-0.112094684464695	-1.88090033110107	-1.9671988337573	0.0403886926629867	-0.384310280264771	-0.357568495501062	-0.134290844981742	-0.492158686934001	-1.67195895915728	-0.653167477882104	-1.17269305058232	-0.486559098019764	-0.15099195514177	-0.998352750101949	-1.07101339325832
WDR76	70	-0.751585515177092	4.74045492642638e-10	1.19085811073601e-08	-1.33161638489445	-0.354510205053412	-0.872467339390696	-0.326615294414168	-0.350807588701454	-0.797103363111706	-1.56654903795509	-1.06104167907586	-2.05759271392107	-1.07794985824251	-1.18162459964093	-0.72236335581281	-0.727353555727523	0.220069562049282	-0.332694960591107	1.5090906306583	0.762032389021847	0.0925148230153149	-0.383987828074578	-0.0774413684126784	-0.434772166605153	-0.666617484391948	-1.86799496328996	0.248636474250894	-0.636232582903386	0.0990302291337444	0.0689425912538784	-0.596154190117772	0.420050505986194	0.346373631482005	-0.128216752558013	-2.7936479917722	-2.55670594213409	-0.207640573490258	-1.02650145381227	0.558771808227997	-0.00159999383676483	-0.188762042881536	-0.521385543066948	-0.475461717977292	-2.36630530757244	-0.499267549213306	0.00554974717756961	-1.39092509188159	-0.303669854865776
GINS4	70	-0.758574907438819	9.68719713682772e-08	1.18196593448357e-06	-1.24351467420788	-0.110599398940403	-0.852647281690047	0.551614533615363	-0.395458906349915	-0.513668223940975	-2.04079777740152	-0.885610629410776	-1.94912542582813	-0.470852620030603	-3.01370663650728	-0.379033459106805	-0.252126047651483	-0.032779335355506	0.039036305418626	1.42719713201349	0.041312851419502	-0.145480669026124	-0.205141886975893	-0.188135544694497	-0.406619334117763	-0.834327605641144	-2.15350343349611	-0.466654515383778	-0.628626331523913	-0.141626225036777	-0.0747213330532778	-0.370435437159171	-0.143201711365195	-0.0875219070894279	-0.253438155919389	-1.40074811317519	-1.76899355459358	-0.295060425932582	-0.826793858833845	0.232877198797092	-0.0331978951090042	-0.0789505729521182	0.340094583060482	-0.436491510088459	-2.28114815928212	0.418027092094292	0.257343747293118	-0.851936556682812	-0.507504058165874
PIGW	70	-0.76384689995349	9.23326278094857e-11	3.02082942488202e-09	-1.39997349061911	-0.391696932717461	-0.103078426310378	-0.179239619649623	-0.633228959400497	-1.12014934327398	-0.602552802363758	-1.20567915561376	-2.76384529254717	-0.51534302987243	-0.954444031095615	-0.173345543977208	0.451561921361424	-0.821248034539744	-0.210350081082472	-0.586747172877516	0.0472406606128627	-0.0875213381404003	-0.174274927245251	-0.236978389937311	-0.438317036971363	-0.82395009977417	-1.77269279529212	-1.10978192907936	-1.40925052754914	-0.472738318929614	-0.970591175692683	0.292996305201735	0.575059990945452	0.298819328013328	0.964529746624075	-0.55135229305214	-0.495753936900516	-0.199638826819087	-1.12045481242599	0.149102360075819	-0.721143929164295	-0.255263062512163	-1.58468414020752	-0.940513650279127	-1.9877878892136	0.0481718829540328	0.273052753020572	-1.16810899832903	-2.17447145631019
PFAS	70	-0.764157064554352	1.12488256745162e-10	3.5292991670738e-09	-0.322831989460495	-0.51439791267649	-0.633053513849761	-1.13622245350382	-0.636419225298966	-0.9777050167736	-1.89898050972113	-1.22343538687269	-1.28685118229321	-0.448739868315768	-0.769672999000257	0.0685924176697027	0.0107351781480611	-0.0638724208117963	-0.191288198344724	-0.273945374777765	-0.00479760918843805	-0.203611693383852	-0.338461741029131	-0.0508921372846077	-1.08100485908925	-1.04730839867295	-1.42978910580443	-0.970395949459229	-0.441723681158289	-0.562821139666032	-0.515509919194163	-0.0541348490983933	-0.0389867448481456	-0.249417374841735	-0.336275134727182	-1.57721356680604	-1.56575139920967	0.156549721584729	-0.631531487283989	-0.33223451895954	0.13701222122372	0.0633948493161206	-1.40458094912095	-0.879840694067	-2.6074269204766	-0.120299791441866	0.11125797926351	-1.02452785203202	-0.0671024992415158
LTV1	70	-0.766114969545642	1.33289533166774e-15	2.66362921144629e-13	-1.77502381580323	-0.204119264849931	-0.670228349010099	-0.357871506790176	0.125060599397287	-1.11426623069863	-0.791265682828056	-0.835086091161209	-2.19150219183682	-0.518272195335206	-0.126761860851091	0.131529015239259	-0.173069823244595	-0.325097867586395	-0.0836381352801912	-0.760887061497568	-0.348603416006946	-0.590023012198473	-0.769064763603776	-0.428908304761492	-0.91410406112021	-0.925723615348981	-1.00601630765592	-1.33010311295613	-1.12159479494186	-0.325407665651906	-0.756480278446167	-0.0574747731722164	-0.00802244291523541	-0.0617803614749103	0.257893777605205	-0.549869285960943	-0.556389412858306	-0.0416640670951286	-0.970315731451591	-0.56599170259552	-0.224479329280655	-0.595106099546414	-1.92401243484849	-0.72616301281886	-1.56131931793186	-0.192173412596157	-0.0484250497331327	-0.992889492526496	-1.60255002801722
GINS3	70	-0.766294817018613	1.27760294424042e-11	5.63415278511749e-10	-2.20916514161589	-0.333907594409827	-0.262964911144495	-0.556802844308785	-0.40775983342612	-0.79980819906121	-1.5775938199147	-0.580825291230935	-2.32871442058601	-0.726089653281187	-0.824207168397151	-0.201452066298846	-0.264240672545054	-0.25845705632341	-0.412213629631296	1.0125270722503	0.0265819664819099	-0.00703504611361773	-0.283735563148979	-0.317279099579907	-0.634797788715495	-0.707187412433093	-1.37818726221122	-0.960734030003428	-1.27968332865371	-0.311007626867574	-1.0268642246696	-0.328436391739925	0.132537418509797	0.216524969093513	0.50684986136533	-1.29725573478321	-1.31346638475542	-0.170567129946215	-1.02757047076688	0.384733939177868	-0.271991128245296	-0.464235098651674	-1.47986763943531	-0.39989102129098	-2.22193766237093	0.0321290379809247	0.0213232661445097	-0.884338818727099	-0.273287704137849
TOE1	70	-0.766547378060281	8.05659361743848e-13	5.29746696050297e-11	-2.25572011079843	-0.125160528311432	0.0108380817266134	-0.480848235163078	-0.366948578157189	-0.645451989225427	-1.58235240785731	-1.30843657377409	-1.03381017660925	-0.37619677063249	-0.0225320242012678	0.00133427837400167	0.0341981953799636	-0.596212901674729	-0.361004480841002	-0.386799820465647	-0.305405603834383	-0.310016469642817	-0.55075856038214	-0.132395621490703	-1.11346240640354	-1.03115408114663	-1.30506362235462	-0.899861224012462	-1.24492268060181	-0.523957614670901	-1.26093594051849	-0.483202115661669	0.377894523178569	-0.205105627276188	0.149291241555777	-1.72178259534754	-1.44423097655698	-0.0154970509203172	-0.349101643262717	-0.38153503089697	-0.493043935173096	-0.456400141849383	-1.62125284474783	-0.740050035758797	-2.10022676854109	-0.318614086271487	-0.0757687988116193	-1.44356533108924	-0.778417504762533
BOP1	70	-0.767155905075604	3.92120681083364e-12	2.06114240468986e-10	-0.783494750989604	-0.301927527859964	-0.749868586551581	-0.893392963456743	-0.428701937995566	-0.793985521450228	-1.95845385297359	-0.62225326974031	-0.384701119279276	-0.549723852362173	0.524958713011557	-0.326009084723098	-0.552425937766763	0.298259087201005	-0.163473596380913	-0.26332513038947	-0.0153880258235809	-0.39290789488907	-0.487598854993102	-0.302694306310942	-1.65591722590209	-1.26015253169668	-2.68720267851591	-0.868648182611724	-1.30220149609153	-1.44212643317097	-1.13961625756376	-0.392651549796551	-0.884572361037032	-1.14745970503864	-0.289855871521888	-2.87562050481558	-2.75732204364797	-0.0461861241740384	0.0365429061741565	-0.479862239253403	0.12692526008117	-0.294733981867319	-1.86151881554001	-0.855137643538499	-2.22420841624969	-0.463391614436809	-0.132817172086525	-0.83006949885649	-0.554018916345629
TMEM138	70	-0.770584555522303	4.13437341966375e-17	1.41090263376894e-14	-1.16663474054415	0.112101647389764	-0.187677186957882	-0.876751032009152	-0.333394326644958	-0.9736386821481	-1.23951732523815	-0.96921032738438	-1.49341488273102	-0.63277430919801	-0.657809589423105	-0.118575316050977	-0.0144876171174464	-0.675178729799592	-0.150761780827472	-1.16285901229098	0.0344923243270785	-0.458394462529062	-0.588120351093465	-1.01177610774723	-0.319920253688258	-0.673769234856606	-1.39748231023111	-1.28942025672758	-1.32170857300601	-0.495792603653022	-0.736473004996459	-0.235823751596432	0.0250149208508175	-0.208621723917167	-0.00931488722616474	-0.978037177821814	-1.30591689341203	-0.176999962789344	-0.819850549338419	-0.614648028609513	-0.57082805933622	-0.494604748173565	-0.825215446757196	-0.943513035732765	-1.64171891881871	-0.461403107983122	-0.243519110417282	-0.954404165322709	-1.1162789648149
NQO1	70	-0.771207020448521	9.1632453139655e-09	1.54569663539455e-07	-0.0275647335839848	-0.214993705208621	-0.699233821198187	-0.171467575581349	-1.06550696786683	-0.244058775974083	-2.23449511777225	-0.710626814091135	-0.577751027669493	-0.746656214395268	-0.0677820426003035	-0.17897446382978	-0.377590678895657	-0.0181225080333563	-0.0123893853290355	-2.31738250026914	-0.0122073165782982	-0.258325635357469	-0.658704021279959	-0.498462782723065	-0.335321595535567	-0.414097494241237	-0.693955153187648	-1.13249792693523	-1.12200371218457	-1.09106182015341	-1.6373276370293	-0.161551058549759	0.241772740810499	-0.0819978143475626	-0.460224676768741	-0.293536939225407	-0.812158902493112	-1.2504995563326	-0.0332508086896561	-0.292132191691198	-0.45218737482708	-0.69358760719043	-0.0816711240856213	-0.192998903727153	0.0224233728161085	-0.982937089418742	0.0985289073397818	-1.30390706047886	-0.85699000639221
DCTPP1	70	-0.772645005131319	2.35874827213663e-15	4.18574033380278e-13	-1.47089114689881	-0.0338823334634331	-0.642913115399337	-0.774710340564638	-0.248187112429568	-0.662187828700367	-1.68838019401621	-0.108938311444035	-0.908783283318525	-0.726346275788389	0.0605793831218643	-0.30619699390164	-0.566897973396205	-0.130811233250639	-0.134308937812947	0.188811784126566	-0.0423475005741087	-0.399719186019756	-0.608562642366802	-0.351680379949461	-1.0193871939499	-1.22243879257128	-0.917737186915414	-1.00659735862038	-1.66363330472757	-0.989261535309862	-1.13024124105495	-0.257921201301133	-0.0791959324555637	-0.000925308239374968	0.217422920359954	-2.04991821671478	-2.180264858855	0.0833594130174379	-0.643085650672824	-0.468819984761892	-0.237455150839519	-0.701028428095334	-1.62224205650701	-0.640912820855364	-2.1433567339063	-0.263241220131089	-0.0865647833447604	-1.41281072408526	-0.947259164292617
SCFD2	70	-0.773677286165107	2.5392760680971e-12	1.41168475545188e-10	-0.481583730173038	-0.367209241247188	-0.647653028553125	-0.874719026924367	-0.927511674255956	-1.13155995811142	-1.68913402345578	1.34132919578541	-1.16037713961139	-0.968998842689879	-0.468170132706988	-0.389709169584943	-0.435291769653969	0.0707343527931772	-0.291735046043356	-0.0120413899995601	-0.175299123250482	-0.24073965550351	-1.00113353414208	-0.365057070764146	-1.21704672075429	-0.608255404903237	-1.93766303123799	-0.928427751435934	-0.935959505173173	-0.507748124389394	-0.728918787448472	0.0263483185110016	0.0278245400289994	-0.436029125700402	-0.0290584135843443	-1.11311842050008	-1.57738692127829	-0.0472984214664915	-0.511569094910066	-0.495542121838424	0.257566202425789	-0.367614027303372	-1.67890530005252	-0.421050692175274	-1.71087882316612	-1.21812702488713	-0.209160098782999	-1.16571707206418	0.219919710579364
MCM5	70	-0.775296531001834	6.43185675228513e-10	1.53849692164592e-08	-1.21294307706087	-0.551518205826943	-0.835797296330921	-0.143452881878454	-0.421983096173336	-0.53047697547344	-2.4059795272107	-0.594560723134217	-1.39484070877732	-0.775326703730905	-1.04557704915676	-0.638700947034809	-1.08396003446224	-0.00454117219538857	-0.228438973986379	1.57231232608906	0.975159672857194	0.228399249567084	-0.592935516544874	0.0528793553979791	-0.950283722768533	-1.02953131077046	-1.52762503797661	0.142724172226622	-0.363446864037326	-0.176529653285775	-0.206151099048787	-0.56403508747397	0.273496107610353	0.0953379157277516	0.090826132866389	-2.56512660908635	-1.98152272999449	-0.097080854671961	-0.253015551905352	0.34516571317533	-0.0171094155493457	-0.30546185225285	-1.11731965481962	-0.444339437997209	-2.3783123834339	-0.619810556728975	-0.0592397937471376	-1.70488168212489	-0.0846215939416375
HELLS	70	-0.778230289112848	2.50748487160716e-09	4.95731100017736e-08	-1.3906282953334	0.0683458597823133	-0.908854249965974	-0.0633624601817947	0.133963114758775	-1.19691894235575	-1.059371007807	-0.819066346210137	-1.46040041985552	-0.747415352976989	-1.99722189880696	-0.488494478694428	-0.959510750526175	-0.188738811639848	0.105351013319669	1.41182547229727	0.52262632825292	-0.0976846883300602	-0.239068285138667	0.00344975522217418	-0.451304123493217	-0.700821553508114	-2.49454854987259	-0.245108773181591	-0.737872145281151	-0.48958187664834	-0.46980279698842	-0.69365456065938	0.179791597785189	0.279709613249079	0.0255484723805417	-2.72285443381848	-2.31349281567223	-0.115909673101167	-0.584938183288883	0.582063468171508	-0.232864191020532	-0.213232270347471	-0.302230597588509	-0.451934967146505	-1.77107801710646	-0.0600513233716429	0.100057326876974	-1.38502300128378	-1.29222061438915
COQ3	67	-0.778517550440913	7.61592910059537e-13	5.05798021884451e-11	-1.29076539394184	-0.597025805179659	-0.7947639242167	-0.373084562783489	-0.883307003972995	-0.413825759046822	-1.94556523419253	-0.239172858624928	-1.45490522272448	-0.832140994077572	-0.352730039708796	-0.435067854076436	-1.00738375067756	-0.0966894246787761	0.0146014800249314	-0.701991036136923	-1.00732634697762	-0.415717526205146	-0.55087651888383	-0.515709338415044	-0.714369244497881	-1.25441205167397	-1.34851005353373	-1.2240973319092	-1.09195503241445	-0.571881804533127	-1.11302044008239	0.288117421511314	0.111978040881856	-0.0981319032491242	-0.493310449675728	-1.1905060663227	-1.22306250306158	0.0125112056265456	-1.02470289730348	-0.129004318931432	-0.166700643254406	-0.395548782814987	-1.42521632482768	-0.626213856173466	-1.60730172653311	0.099520313608536	0.357569284024776	-1.55977907166499	-1.58708769513489
RTN4IP1	67	-0.778935679697046	2.0573282931666e-13	1.71865106628092e-11	-1.62181514896139	-0.197348703621167	-0.634982940031713	-0.97886011128638	-0.304118915216889	-0.622881098670754	-1.32410210375046	-0.741608856296795	-2.71064646099484	-0.812925226732621	-0.442694816919499	-0.418241228626314	-0.320037209740085	-0.262153428591818	-0.193563972788175	-0.875402526442665	0.0587188717147016	-0.193310726483357	-0.566357756903064	-0.44245856253407	-0.594456797818173	-0.643878722658796	-1.23472966503475	-1.28194046177815	-0.814070264077496	-0.764718936690277	-0.611659351029908	-0.191856923677205	-0.262782965308673	-0.202667776012493	-0.321405491420247	-0.0981731062077731	-0.404196309142032	-0.140890062150776	-1.15019383048071	-0.925497927575903	-0.238644562600003	-0.463399927300164	-0.976818543172079	-0.659205697780794	-3.22360517188055	-0.257036524804535	0.209537258198044	-1.44939328204673	-1.21009070712225
RFC3	70	-0.779070139354298	7.59898101795946e-09	1.30971714794388e-07	-1.35827344971701	-0.105872276211992	-0.88767964768128	-0.14554473333457	-0.308171633769404	-0.8548612600594	-1.64573817844923	-0.386514099360721	-1.07763341693493	-0.666663734947663	-0.710979240541596	-0.206020258678996	-0.115399819719083	-0.000873496845063851	-0.15353729979938	1.10378834298134	0.453198209796764	-0.188230682199393	-0.464003795944849	-0.338541825540391	-0.735932441477894	-1.14845758379537	-1.45913755039661	-0.594568997196221	-0.386133459424166	0.0222342368353507	-0.0558976208189357	-0.500877132763814	0.168968768016899	0.156518203281984	0.464525931400725	-1.34990845186916	-1.61475726767097	0.0894879409604883	-0.890811332131302	0.273980809467282	0.082610072771428	-0.29518297930408	-1.00972843956351	-0.72257538500424	-1.97948041485109	0.145732910268552	0.224727928815143	-1.16399374694413	-0.673723361003345
CD3EAP	70	-0.779891737757539	1.03567973593515e-13	9.57074394248932e-12	-1.00392168882844	-0.0413222185821246	-0.659176562212528	-1.47283920480647	-0.851434248314856	-1.24515979965492	-1.38869822136584	-0.052329573134901	-1.29104135319829	-0.375023107566575	1.46955992883172	-0.072028858525129	-0.02270545511663	-0.292349379357165	-0.496475284231551	-0.185458398707049	0.100402830810222	-0.456301078674809	-0.501972411453908	-0.362342050193849	-1.33264529286307	-0.748826028554108	-1.00096038112091	-1.52850669200446	-1.49358731048658	-0.744309968881996	-1.12606497102525	-0.426760117092501	-0.49247859374117	-0.911547819562135	0.896604740957627	-3.46882396550078	-3.61890139138425	0.0201047128702468	-0.648984629412385	-0.447919087558769	-0.161305715800094	-0.451695683299621	-0.521528551653566	-0.459074192285416	-2.8556123194976	-0.254572865830943	0.0536174200919769	-0.765143564036797	-0.931819842527603
LRP8	70	-0.785192829141555	1.68132148069745e-10	5.0060500785008e-09	0.0569301978362801	-0.722290089209613	-0.418851036824327	-0.125350323893799	-0.098922733683717	-1.30844280195625	-1.39564487703105	0.311661534122234	-0.310263307418867	-0.405282475463477	-0.700002998703826	-0.306430152184541	-0.486611256497204	-0.102500811546979	-0.343078163732649	-0.982108527497145	-0.65101244464637	-0.411949219691126	-0.425835249637146	-0.441269862329147	-1.15087210725207	-0.79850502360996	-0.626631929657144	-0.335193414478896	-0.724468067475364	-0.356651710292553	-0.674237997714285	-0.175697332205504	0.144303675086686	0.186139851210284	0.702770054465674	-0.525300905428158	-0.632088215910808	-0.0589803312595602	-0.828324991063077	-1.07425055373709	0.140087978200258	0.0260738119441167	-0.632060419098168	-0.60906859508235	-2.24327521767347	-0.404080978534635	0.238838550839131	-1.09448226805988	-0.62617892089321
SLC27A4	70	-0.789736509390926	5.46026561360779e-12	2.70356276430911e-10	-1.69959513083206	0.23115076493967	-0.256880282791494	-0.181462542238914	0.27698567672026	-0.86166508661749	-2.07746513126082	-1.31819925488676	-2.29502994782073	-0.0111188399916509	-1.48660893159956	-0.309053987044687	-0.489403495913268	-0.395518410935012	-0.107924481017952	-1.18208126681101	-0.0398822611440138	-0.427708529357215	-0.249281193452312	-0.402370644281485	-0.437311069249053	-0.183993511772253	-3.07882899047682	-1.02193016926496	-1.25562646582798	-1.01076544640174	-0.867101908036077	-0.414297647637314	-0.425433722291299	-0.358444598424499	-0.417471050200641	-2.07960149962636	-1.99023194317924	-0.384038663492293	-0.504605140542215	-0.011657659077526	-0.375387553504031	-0.293371550622463	-0.69592477760214	-0.344957941863416	-2.87535548332235	-0.377507657989193	-0.177977520651164	-1.58316164876033	-0.56937647670025
GINS1	70	-0.791261123864019	2.8357668244959e-09	5.54211274898396e-08	-1.45678325546382	-0.196902169819986	-0.983254647812091	-0.0854606665613369	-0.224599199315555	-1.19380355824801	-2.53163784900808	-0.158336003989136	-2.53657963771838	-0.761235848626897	-1.58321908242864	-0.418159541906321	-0.698767291639583	-0.0821131477807013	-0.0619274172008742	1.42246723429171	0.345535743347345	-0.0886646780432343	-0.236657531443801	-0.38798598325984	-0.399797827170558	-0.753712382691113	-1.26996577473696	-0.373002006934144	-1.21722824524958	-0.588420402542793	-0.592434136008898	-0.564956986748249	-0.00591915046765708	0.0392474875084931	-0.0205253460444986	-2.01554775062432	-1.79793966161083	-0.0836830869444413	-0.767077915559366	0.356182118679356	-0.241300286092539	0.0719568648641956	-0.395319229791406	-0.0193927778488	-2.26566403750197	-0.0093242591337212	0.171834116235917	-1.11648065941141	-0.36142025053363
MCM6	70	-0.794996443478806	1.01814511349767e-10	3.25894587411333e-09	-1.66471619363181	-0.419321663011957	-0.995171301442985	-0.11043458125974	-0.40678000832456	-0.967585368943901	-1.90237815097461	-0.843593550520511	-2.45052137853875	-0.734487631988949	-1.54976720524185	-0.29091792256424	-0.635986100294172	0.155657520386796	-0.132461875063362	0.189413205529179	0.182644596305649	0.08245226667907	-0.156126048669821	0.0696442790083173	-0.499478356065866	-1.07816452151185	-2.06106709816734	-0.0609711507039025	-0.63434725330436	-0.207332858303398	-0.489594216334747	-0.220829613966307	0.336975667967055	0.361778348861446	0.577012466507842	-2.0686614979353	-1.68320958266114	-0.0658739091978261	-0.892297409875413	0.135390757439334	0.14369793504525	-0.137741316137174	-0.837787592645179	-0.401376790236324	-3.47688760105921	-0.802004460581515	-0.0312851931995533	-1.60422001185141	-0.88274215609725
HNRNPAB	70	-0.795421487651649	7.66081786416971e-12	3.64661506143804e-10	-1.53211553263594	-0.0069294013607544	-0.609419816636275	-0.153256669822314	0.0305823125159274	-1.00487105725081	-1.43316717598014	0.767325481068832	-3.04764713737724	-0.699712284386151	-0.638424026950968	-0.800055932353134	-0.810965816445536	-0.207766046310009	0.0734767283879049	-0.492122479275519	-0.233018103399923	-0.255576856467251	-0.380373027717296	-0.326521738720638	-0.741108531530294	-1.37077086933485	-1.55106408615894	-0.766081904563123	-1.33874723559928	-0.622062539417521	-1.07314111379313	-0.32928622677185	0.104815728291888	0.112305600354024	-0.0348208899749535	-1.75981844213459	-1.80609268215334	-0.0201140888081852	-0.690604875491897	-0.414639048354828	-0.0107702686934416	-0.909534817854547	-1.41822880860704	-0.53606965781621	-2.65529761197034	-0.153869023390041	0.0262559384144139	-1.13601630752088	-1.87174352419127
PCNA	70	-0.796748607701507	7.09799160058377e-12	3.41535031852818e-10	-1.66173493839477	-0.226332331978376	-0.934039118666082	0.0361069882377809	-0.199479830366609	-0.940024343079802	-2.0841624160197	-0.31249855701314	-2.9239234000722	-0.914954121310139	-0.932374964558572	-0.654832129659374	-0.864532917961036	-0.17690606565996	-0.207685842892811	-0.0264487904370571	0.542495105327181	0.0401953067776726	-0.10119270233139	-0.617531788829805	-0.634750717636349	-1.39260813384255	-2.1330465231597	-0.50927701845528	-1.08613144500001	-0.46986773945563	-0.806401000344542	-0.792514419856009	0.0144246762699958	0.0347559231237784	0.210642859674303	-2.11067307376698	-1.92448925304584	-0.124476900380587	-0.856315254535655	0.407219213388451	-0.266786956170748	-0.36529663045629	-0.458510187088476	-0.167549956403049	-2.56276853362285	0.0024150504963424	-0.035206850388714	-1.63330932456438	-0.555397720130265
UTP15	70	-0.796784959938362	3.57940897466642e-15	6.0609503722176e-13	-1.87732896532115	-0.248498498536437	-0.264290869843232	-0.573493698298682	0.0171569470681177	-1.19402142083949	-1.08982413020557	-0.200236856595903	-1.05902659357529	-0.433713226785405	-0.997755197699653	-0.249122532348883	-0.120889092363536	-0.277344261459441	-0.110858632418782	-0.850696478330614	-0.732182368195096	-0.452670930022712	-0.579437440554447	-0.542081696489604	-0.776184313151357	-0.449547843155589	-0.785667479359926	-1.45674341223885	-1.26167157417727	-0.929868251677132	-0.848056313706847	-0.222466567911319	0.0373067370067846	-0.350157171727314	0.0647532419323598	-1.06044744221797	-0.888277878301213	-0.215858486163208	-0.843113421529011	-0.673170283829671	-0.162190402883354	-0.166461542433872	-1.69893197157758	-1.03275765004215	-1.47533203059264	-0.215152282148917	0.00190766620344862	-1.05876002075654	-1.46087279998256
TEDC2	69	-0.802933574302174	3.16495183465837e-12	1.71732179220968e-10	-1.49440147180208	-0.561407092114433	-0.835584506633394	-0.686826102409874	-0.504887658230726	-0.616016055033328	-2.21837739126158	-0.742776020317724	-1.6035038567452	-0.899192566721344	0.129556557572635	-0.342120207461644	-0.358567974262292	-0.132102501501303	-0.118936277004077	0.862422682381383	0.627086415433132	-0.0710133911156415	-0.272618179065584	-0.422252866651588	-0.581059732974609	-1.12908592599561	-3.06396642512335	-0.673008194088014	-0.981313389475754	-0.935716597915218	-0.811562913294655	-0.40799574178419	0.0187549450546638	0.0601141419832416	-0.110059405237681	-1.91354046202727	-1.68107256277357	-0.180673731749917	-0.974590308082805	0.407670213738278	0.0127189481819866	-0.632185099906499	-0.726357133767847	-0.576213962497091	-2.57442751657697	-0.11659362828237	-0.0557460650372837	-1.71724946285292	-0.138293928165271
TIPIN	70	-0.805035392807416	4.58231928175635e-14	4.98947802315172e-12	-1.68090499448652	-0.284273526075931	-0.502798900670154	-0.965243013524103	-0.825415927327139	-1.33084229304363	-1.33399826013376	-0.672753226266352	-0.675032808763732	-0.747334308423363	-0.0227405382111784	-0.37973768400751	-0.0689626915899264	0.30687205836357	-0.297054545053878	-0.379648437208425	0.00917535187500595	-0.219066027273588	-0.780903287173562	-0.498429600167009	-0.781817147527671	-0.96816973690703	-1.43299983310969	-0.724825562343293	-1.20290125075175	-0.852000060770425	-1.2463992791012	-0.726102186739551	-0.05393292234099	-0.209076549832111	0.243024633647001	-2.92166787467868	-2.44652077755875	-0.0796742167244756	-0.995737551201464	-0.665639729871656	0.111204549441347	-0.605685712074246	-1.01715702847844	-1.05530703601616	-2.27234350249316	-0.316624997588533	0.0738679164181846	-1.09936948851433	-1.05340092519836
HGH1	69	-0.805836393595417	1.55640686193322e-13	1.3381479461784e-11	-1.7557116916714	-0.219345622208462	-0.364728062138081	-1.05602116877631	-0.501438544560517	-0.713760994537303	-1.44567809017226	-0.713519080241622	-1.77426210230045	-0.660823984729434	-0.254234893741232	-0.201371178453238	-0.336245817642357	0.0622954859501294	-0.24028389327608	-0.717046268462729	0.378317761974553	-0.254538490079913	-0.54435699998472	-0.286791952193228	-1.0498490343719	-0.469468921274663	-1.86784477116772	-1.84721306333327	-1.44294215963421	-1.16963611472342	-1.15187043566249	-0.186589218615178	-0.741176352401221	-0.779578792382459	-0.745715440902918	-1.86098380165815	-2.10811221208692	0.0120431052944915	-0.534995393585796	-0.393309693780212	0.00724290731995805	-0.545107824204364	-1.74738733983535	-0.754799634412684	-2.1573611940849	-0.290179184512233	-0.022822753107116	-1.25903109556182	-0.726783245815017
CCNE2	69	-0.806815897534916	1.14921247831724e-06	1.03709646843096e-05	-2.56820472996232	-0.25265343089172	-0.588154054917226	0.690400241548234	0.0476134243677401	-1.16305313293811	-1.77482013727633	-1.51171055195041	-2.8094608033046	-1.01267532869563	-1.51791739635217	-0.687456767194284	-0.819090784146848	-0.0727089533823035	-0.40942808832223	1.88128122267779	0.627513169060046	0.391067830053629	0.407196048016397	-0.259920102088117	-0.144862253756384	-0.422869735573964	-2.09781701368166	-0.189573130020331	-1.20425284202599	0.238145871950837	-0.849823262461112	-0.750011558264116	0.274610851675674	-0.000548928358822544	0.929171058104336	-2.54161505333108	-2.56716276063464	-0.363315824390877	-0.718767997288238	0.802008785160952	-0.0806853389950853	-0.0818505367792298	0.263535404287189	0.24047364004701	-3.27205332299707	0.0710140439761252	0.245059869017023	-0.753955640759252	-0.937838624481873
MCM4	70	-0.807709372970396	1.7639673030979e-08	2.73624634386836e-07	-1.52811219448568	-0.162347153691158	-0.566864020041248	0.100105674478644	-0.329477080443822	-1.10621063405375	-2.548413459409	-0.6896033334585	-1.21353507672932	-0.898088775137235	-0.909722918604145	-0.558842779024754	-0.83073204669	0.0253579266044227	-0.247671017907652	1.35035181899008	0.562629177141231	0.100484426514464	-0.117407833297884	-0.0619127043034229	-0.583932845076967	-1.00594897499206	-2.00129441171164	0.124645820199384	-0.61689430451367	-0.218211281562111	-0.469004684280243	-0.670393712943465	-0.0315625005871205	-0.167739365915827	-0.0585718329283808	-2.37120952335851	-2.36201549562908	0.0286279596405608	-0.735465685769444	0.378568484526825	-0.125472759529306	-0.044316757673723	-0.718294988120029	-0.282225666681084	-2.52530775545398	-0.145418349367066	0.0673596681825089	-1.16698402087078	-0.398391403429074
TAF9B	69	-0.807850327433737	3.7203860438748e-07	3.82949434919864e-06	-2.26478899148244	-0.237785316281362	-0.767106529148161	-0.222141282691305	-1.59790292330362	-0.380894515633696	0.520201148055846	0.183703039349334	-2.64308420917262	-1.16374976742847	-1.69417335938057	-0.809158093265492	-0.244663206908176	0.337261690276738	-0.00504269693551891	-0.263170185112789	0.0338356485724059	-1.79282649435001	-0.869522336510115	-0.639596333487294	-2.10305305137704	-2.91236808729393	-2.94310396967585	-1.87428661969696	-1.20486240867064	-1.35808775217493	-1.55051238021694	-0.528862556124142	-0.658513451958505	-0.406299772828253	-0.696761808898399	-3.52208428621699	-4.08889103089603	-0.41178807802593	-1.17318433892207	-0.59180811345555	0.367783637611956	-0.15951490190291	-0.696649545977966	-0.861219867434456	-1.12123524009481	0.0266941509463858	0.212190200237534	-1.31326928750139	-1.2547312889272
NOP56	70	-0.810035991502587	1.66228105508677e-15	3.21731202816273e-13	-1.43030864176414	-0.138534630353412	-0.34098870296429	-0.295856627201142	-0.5204789368018	-0.847368999726898	-1.60865511305212	-0.737420557733396	-1.03627974905547	-0.4445799077202	0.111217483709884	-0.129207208879607	-0.347019591328736	-0.450377821494877	-0.243457860554306	-0.550238594957105	-0.204669028854961	-0.347210778721771	-0.423388977813299	-0.402871807397821	-0.910590945188698	-0.728014848768915	-1.92754120316493	-1.14735543575891	-1.27003562246411	-0.584588101946301	-0.961434199067469	-0.264489134830865	0.0127740287910943	-0.219173086210135	-0.0402360383640133	-1.88931494131467	-1.87734279558956	-0.118768787843631	-0.767638522274573	-0.322103695451973	-0.432757479370995	-0.798097993574464	-1.77488264201286	-0.902026855298931	-2.91202158143143	-0.270222505700189	-0.0875260602986067	-0.866218222445491	-1.13914190617015
CTU2	69	-0.815647834246181	1.82139701049101e-16	4.86773837189297e-14	-1.10190289026775	-0.301268652783582	-0.54347548997654	-1.4499332263748	-0.398689831329766	-0.919128309954349	-1.94606699985287	-0.0690508589147207	-0.89055380899381	-0.522655363557148	0.315435136654583	-0.101063895336206	-0.130135610021822	-0.0842785599262691	-0.147088920577091	-0.586819240033808	-0.528668399597049	-0.570211771763924	-1.06747437941094	-0.631848182464725	-1.72588164997242	-1.35863993699781	-1.56535148841825	-1.7226236347149	-1.77803427546597	-1.15579347047629	-1.24535567569759	-0.311465808293011	0.54655598093913	-0.625624886007291	-0.21983098244446	-1.52640696826745	-0.858638189533094	-0.223866133797322	-0.53693388049059	-0.883475487497823	-0.0952330226225632	-0.331902332513952	-2.05883750228503	-0.880626659334274	-1.88152633823035	-0.712426273930967	-0.279466897594899	-1.2080678026364	-0.906465926792081
POLR3K	70	-0.81614994493742	8.33625110992861e-14	8.08263785299075e-12	-1.51776840281435	-0.023423586991125	-0.910191088762821	-0.432027931308131	-0.294291730732	-1.17005984390594	-1.95588780482206	-0.19869164898973	-1.71593641084005	-1.14107558306177	-1.0242551160282	-0.086808190306604	-0.326785638631517	-0.12610433154777	-0.328252315836666	-0.224057098664428	0.201880379269693	-0.297417443049026	-0.531014271540602	-0.654366090743167	-1.17803919011741	-1.14341537158766	-1.22072097068659	-1.0425528597065	-1.26254356238995	-0.629689567502416	-0.67231838916133	0.0335183841715256	0.270268293120356	0.358311819448671	0.331987383121171	-1.38567490443231	-1.37166186273635	-0.40484390966526	-0.974499219640745	-0.285701674642798	-0.129380175736728	-0.726630321623398	-1.21893435418275	-0.690889700688855	-3.30344854834924	-0.237895076123078	-0.0199726466224429	-1.68624348598166	-0.822857168927795
FAM86C1	65	-0.817385947569329	8.86601053516471e-13	5.73369812510273e-11	-1.90179066961478	-0.101097239605264	0.169015350827557	-0.771393008880645	-0.618018191917047	-0.913359501374164	-1.14143775682038	-0.902935594914843	-3.0222175134341	-0.0244787155767757	-0.851980723110861	-0.601578303879615	0.249903793509648	-0.450027397689783	-0.360576976573216	-1.88843176523059	-1.25916354500674	-0.677037481440159	-0.13457249052161	0.0347334452783427	-0.995766717405759	-0.569956141862724	-2.11994114200981	-1.48181819735968	-0.81921232699728	-0.603889953183939	-0.423607808363697	-0.322663117088465	-0.287526969796272	-0.397902584394068	-0.215654073670972	-1.08883806883537	-1.16311904484006	-0.130651681732026	-0.843983846884323	-1.03988927336116	-0.201572325690274	-0.0528636133138671	-1.05111666038836	-0.576456610553398	-2.60752887662945	-0.236250242706214	-0.0253925966859672	-0.134522222053385	-1.94634003799825
MON1A	69	-0.821044960534512	6.50810985042662e-15	9.9288182534897e-13	-1.92059303021751	0.0613088343807948	-0.496015185859918	-1.07302642110576	-0.509486474356198	-0.802384998365895	-1.91055581721727	-0.732323311059052	-1.84923811403572	-0.262265623685266	-0.393219831746278	-0.129632419378321	-0.145268502696694	-0.250964218117769	-0.19829291855084	-0.634243432690183	-0.505054567209863	-0.808679021590077	-0.670304061598614	-0.624880681256357	-1.31347304050686	-1.20931876185294	-2.13362869641407	-1.62077659516753	-1.93225921868979	-1.66579820435542	-1.54615701338176	-0.743352586962116	-0.752390303259062	-1.0939821573406	-0.173618732859896	-2.04794076079695	-1.42952276156921	-0.0785715157576842	-0.678135701810415	-0.323952533512753	-0.220238756094363	-0.352427530115714	-1.25729305757859	-0.866641796925098	-2.39314184838301	-0.591040661281125	-0.353551961982951	-1.07604155232478	-1.12978154900306
ESCO2	70	-0.827736902688103	3.49043763767258e-08	4.95677898072044e-07	-1.71053895783569	-0.0614876240735783	-0.432363072228078	-0.132429000080021	-0.203983140958053	-0.94635143486993	-1.56553844080827	-0.422035551266396	-4.71414400835178	-0.615447355592403	-3.92908661292148	-0.600613669489245	-0.32705649550397	-0.114483213550707	-0.345263002321246	2.03178357179632	0.524761582227446	-0.0579032245928756	-0.344890181374497	-0.313586377900615	-0.436351888873032	-0.860608872402133	-1.54339109148823	-0.635605718755269	-0.819564663612741	0.0396160152617585	-0.290385415830505	-0.56437128340903	0.511849039101514	0.213664628371767	-0.212391043310659	-2.62635848782267	-2.56193269805755	-0.0494963349695811	-0.791627138140512	0.527457685932856	-0.21426113033218	0.0395230777742498	0.0677953569398789	-0.418993387929122	-2.27320696231124	0.259369347745181	0.0600591716404504	-0.855947357427962	0.0141699217694852
WDR77	70	-0.828249609630085	2.55083536629513e-16	6.15028587990854e-14	-1.5216724990823	0.0780132165844725	-0.769992736419301	-0.26098049302018	-0.288483148250131	-0.975577788876438	-1.87312517853663	-0.66649124715607	-2.27789464972	-0.452324228192932	-0.519273012187435	-0.331655312486568	-0.184669205085163	-0.00795888577835134	-0.309525276658583	-0.662310447482431	-0.133961766410666	-0.409163432760206	-0.474755147108553	-0.296231608682269	-0.855873828769399	-0.543926693556871	-2.30163455163604	-1.47958259390236	-1.22066632796033	-0.748488649433969	-0.985896457796939	-0.21168409707884	-0.153603613676805	-0.459941421817803	-0.192247319058544	-1.87689162543038	-1.96666627054658	-0.0989797229406605	-0.672915470587837	-0.321191508796022	0.109595283407029	-0.462582257363077	-1.00412950159403	-0.670533055167848	-2.30534979379931	-0.316299901279389	-0.130902905340269	-1.08838962512323	-0.990220724784503
FEN1	70	-0.830729001486677	2.41508644256292e-08	3.59298775780889e-07	-1.73456512116371	0.0467186479838836	-0.667729734760843	0.0873545357225625	-0.0458228098171009	-1.29753932940808	-2.94337173174024	-0.129896859282875	-2.22282332018475	-0.80375503977376	-0.963264441824123	-0.0893385951535394	0.0907231695258961	-0.24005441974287	-0.216461665316794	0.610005661333568	0.492405146484131	-0.0314623186594471	0.0718461479725542	-0.20562108021907	-0.564554769826863	-1.02737220770404	-2.04091054745282	-0.111569214364277	-0.523248856091078	0.00946362198360136	-0.221493643543863	-0.253283990854057	0.267136720907168	0.343849962688265	0.00635616754880981	-1.65136814360231	-1.29211995148457	-0.00365654394026897	-0.72443546909596	0.492586469583776	-0.2072216804167	-0.396556070605816	-0.357618726141935	-0.299350515647347	-2.39169172953068	0.0137765817809518	0.144703087335878	-1.36793753603019	-0.737901624696758
COA7	70	-0.836300557342792	1.87931148902235e-16	4.90433969994045e-14	-1.67728452406886	-0.260609345058769	-0.343413003967413	-1.08064413940511	-0.452077566050439	-1.12772071653444	-1.09954023623807	-0.934991345825569	-1.71480742147377	-0.369999390336022	-0.983291540343148	-0.443027437031627	-0.357396631039569	-0.106411815472281	-0.24558211027272	-1.17586808789615	-0.638291761065863	-0.727460643384667	-0.550297676659762	-0.554408328089654	-1.24526103034417	-0.465342558396818	-0.80194895987248	-1.14737429433904	-1.36843376540334	-0.595137421195726	-1.00421377427492	-0.0688330725498833	-0.168379233733989	-0.238162307223346	0.396088168067216	-0.441517915977531	-0.654485722891304	0.0126601953627952	-0.891098925558613	-0.61002520250898	-0.0389237134117774	-0.328252755177608	-2.09376158184238	-0.800003875502871	-1.9781916798473	-0.0616208411334195	-0.00951119340323844	-1.2672052601042	-1.70772127157636
SLC5A6	70	-0.84010503820034	6.45568263553691e-16	1.41782130912356e-13	-1.3345341717971	-0.167122395546395	-0.267350964498409	-0.622803317477254	0.814470483510993	-1.26076490426494	-1.82146451260013	-1.02508151083983	-1.25429845515454	-0.817088492041048	-1.02610781114083	-0.351767229516686	-0.288551913740974	-0.38011379619948	-0.401414098007153	-0.769303846534255	-0.0186078147968303	-0.38101647008114	-0.63323175513329	-0.237276358463007	-1.47032289622529	-0.826145593944141	-1.70160279235455	-1.07317265269488	-2.38890743562325	-1.48487137038566	-1.73353653129728	-0.383696109254237	-0.0638227646016419	-0.400209220099276	-0.236932293040252	-1.93775656151154	-1.85418945372181	-0.261857041847358	-0.555859335954204	-0.641016776594436	-0.25907695422402	-0.643889109337287	-1.73102626627208	-0.680444815781173	-2.48171564236045	-0.510235929354254	-0.207616479119987	-1.26777413937129	-0.163632681475089
PNO1	70	-0.845249256822024	2.38481161546382e-16	5.82332140409513e-14	-1.143802355217	0.025740999550591	-0.370095221040224	-0.518473815552702	-0.383402591075582	-1.48824878182413	-1.72996319529669	-0.185717958989135	-1.31573829156403	-0.288403564683102	-0.911895963557208	-0.210395335141454	0.0964291357419892	-0.0976296697720317	-0.129347987610546	-0.910696384946373	-0.82026170141976	-0.47893717340075	-0.580182772274818	-0.537560446736676	-1.06561555240551	-0.52288483993492	-1.17338788020996	-1.20848767953807	-2.6622466216979	-1.87919573625449	-2.3011622352709	-0.225600958374662	0.183425275710974	-0.482154378683546	-0.467884753965832	-1.76238516048121	-1.68896083973627	-0.024991973056992	-0.94581640584963	-0.714201824090566	-0.17804988552746	-0.574008234928858	-1.52733747371996	-0.95422293594432	-1.6746567351067	-0.338300813149108	-0.0561463112598157	-0.650906014966731	-1.63324491933728
E2F1	69	-0.851695191669978	6.22765411643548e-08	8.11167490374468e-07	-1.47069938279424	-0.225605189737914	-0.803604004399108	-0.168901882875545	0.195041363535156	-0.952631150695067	-3.64819297067883	-0.477748431316452	-1.48495939564126	-0.711955069436005	-2.02116710075316	-0.735451172231842	-1.01341610099586	0.182700778111079	-0.284510488937043	2.034168466861	0.937376802423634	0.216274490618621	0.295866078968088	-0.0105871926168293	-0.608789755181407	-1.31743510673765	-2.70962640213948	0.0677525195640332	-1.10143255738148	0.0132373327517776	-0.544253502401179	-0.438511559658704	0.561944559604093	0.288477512489251	-0.06209213735515	-2.98306095015852	-2.19397027819771	-0.114127228048269	-0.391975514276563	0.39750438120296	0.0944555367316682	0.00919812478447551	0.10599773334031	-0.668752403026068	-3.62035881967254	-0.878792916690876	-0.166535475406173	-1.58354974578412	-0.786387312120957
PKMYT1	70	-0.852393789315206	2.93618895127825e-09	5.7132055541451e-08	-0.967579564326317	-0.264154337196634	-1.14166396303477	-0.041020140191554	-0.427707079276764	-0.880532653834207	-3.21894489417288	-0.395299557129381	-1.40534480835203	-0.654858286366521	-2.91045702493593	-0.645656575536291	-0.883736137404382	-0.276659276038785	-0.221343504568694	2.26804802846463	1.79553225317339	0.115244089290902	-0.261506214370272	-0.276525321077639	-0.821927291795935	-1.28930100694251	-1.28974385770512	-0.0145970290155318	-0.75755657651321	-0.707071260670822	-0.333395102173186	-0.401827190931466	0.0688360528555963	0.209148435470232	-0.0362789247019685	-2.61079124430507	-2.58254143154345	-0.145926980431795	-0.80205417222639	0.489357073529063	-0.185250323860822	0.261014301346699	-0.71781202616871	-0.750993298733146	-2.2666222018809	-0.0483930999208517	0.00358396213507038	-0.953040426185719	-0.476205376152862
NOP2	70	-0.855289533521378	4.62577101136153e-17	1.48442207372571e-14	-1.10549094063314	-0.0742527212935978	-0.475678655719889	-0.622829877630559	0.0356922450831193	-1.29286445151546	-1.8806765049524	-0.432060344627966	-1.38423734975842	-0.506886999666008	-0.33878181727934	-0.0221699792688707	-0.264392671758386	-0.32719470395781	-0.0486057031209591	-0.695068989281476	-0.434201123600667	-0.505787035663494	-0.606583345476753	-0.397410718356046	-1.31705999674354	-0.7518734487534	-1.03730705530579	-1.08933956622813	-1.59464492082729	-0.970068149787224	-1.1008913158142	-0.226619314138495	-0.205816030607405	-0.543404306694997	0.234632582638669	-1.93596761467541	-1.52444562335177	-0.0927133055801012	-0.640881902748786	-0.820742946246308	-0.282229463416035	-0.422250599778924	-1.44353233806168	-1.01655587462981	-1.80692736103594	-0.353622802529244	-0.186202283604139	-1.13243493852727	-1.43448780884479
TOR3A	68	-0.855925681576994	4.03852407477042e-14	4.55442128038443e-12	-1.64730625225894	-0.167761218338325	-0.55485793906971	-0.676584356274611	-0.663820488893259	-0.968729398640114	-1.83709681072894	0.0686213227957176	-2.21768593891784	-1.09238901082551	-0.828137896273498	-0.401422639757384	-0.587419943502258	-0.362152068490214	-0.11476915345087	-1.06569887266053	-0.692531141619722	-0.320069270286026	-0.499701903293305	-1.05469169847227	-0.764219528999499	-1.27190812334554	-1.6863541563925	-1.41536757350727	0.768539398161699	0.576856753777755	1.16974197273351	-0.711486368796453	-0.79110907818215	-0.608663726833622	-0.189556864332174	-0.717055638753999	-0.0253760975725459	-0.364191782773959	-0.990063415696094	-0.54583841475451	-0.35643414329418	1.51395689448513	-0.672324816475398	-0.533342761461777	-2.92557783412574	-0.254444211778333	-0.0642736997761246	-0.876110335312221	-1.49061090403311
ODC1	70	-0.858351872907953	1.98319778902284e-10	5.72058431158707e-09	-1.18149849193096	-0.150584510394414	-0.586055253344358	0.335939890822229	-0.598233885376247	-1.33844022106823	-1.90254965805337	-0.064772178528882	0.0811268102477529	0.592103639658992	-0.441118082429379	0.017779809838995	0.0745168146626264	0.0190664984291433	-0.272301666397264	-1.41318472558556	-0.645107359463288	-0.620915796003345	-0.693995550878467	-0.485248853063968	0.221753519081773	-1.59986224891528	-3.28288633864705	-1.93394985074092	-0.803520738519261	-0.460119692724258	-0.425139029446764	0.574275702634682	0.0780506704054002	0.464057104496863	0.0883898847406866	-1.89344714476938	-1.87301908459371	0.0614822000677088	-1.10317984359046	-0.457368002641855	0.0337677895266922	-0.4383972572333	-1.16978011770554	-1.35774974589123	-1.20886339507023	0.121173198848841	0.101915564643194	-0.749674209941722	-0.44567722368363
EXO1	69	-0.866754756563651	1.41246113746255e-07	1.63890900553146e-06	-1.49701319777268	-0.189823884224882	-0.733549625159769	0.0568598025110664	-0.231288105698496	-0.817185697126733	-2.49536337318086	-0.588933355892056	-1.69648371354055	-1.03954413338927	-3.5487751348999	-0.349496334349441	-0.795551833033908	-0.141498118689562	-0.312558599353033	2.452710545086	0.818881904133207	0.0194240409219945	-0.123318271178271	-0.129492414496597	-0.469576246778985	-1.12235846627522	-1.52091159252365	-0.114525405771881	-0.423878762780668	-0.192676055038532	-0.0397602597139383	-0.547396684754898	0.155665618663035	0.253893402513845	-0.116537377279044	-2.10370384594787	-2.20526267168903	-0.078835921499368	-0.855204155527601	0.782780458903594	0.0119139674011358	-0.195997945266483	-0.0131592972981913	-0.630646611425086	-3.06818763904442	-0.059436777546493	-0.0864466597552152	-0.607821011351576	-0.105926601215864
CDC6	70	-0.873045100617431	8.52333538393545e-09	1.44877107652457e-07	-0.775566812337205	-0.147349549505368	-0.667210849598981	-0.14447488818274	-0.413885076408596	-1.42561981770721	-2.86919764112191	-0.478720281707764	-2.95216514387261	-0.422384409734104	-2.83771598964832	0.809591250807504	0.33841800522781	-0.281310064389476	-0.393577501423036	0.286716783771177	0.724068529783815	0.215051265641391	-0.13609600962034	-0.370113188278643	-0.434847460920765	-0.903366150370359	-1.65746906899667	0.407446657246048	-0.806535554196728	-0.298173397315203	-0.729889366436505	-0.676350578652673	0.191100257354654	-0.0559180008214463	0.199910389787091	-2.68900596973827	-2.35167310779978	0.00418726731120309	-0.623878674436212	0.38482660798039	-0.275690661970133	-0.274469449851675	-0.475965202529061	-0.396205887847631	-2.23341146044804	-0.278721285892431	-0.0510308438309128	-1.29196635864648	-0.299825688216688
MPV17L2	70	-0.879524601088138	6.59425499820723e-11	2.25036560569589e-09	-1.57478047654216	-0.00758994495149821	-0.633279025010698	-1.23233390298684	-0.148833570922569	-0.81478495153659	-1.62197464902729	-0.438026320142176	-2.45354587403322	-0.535078862301606	-0.995913156842735	0.386245345352738	0.677339201171976	-0.245712484559709	-0.207506022751029	-0.957960638974666	-0.275874637450262	-0.912201007005792	-0.583968824616612	-0.850914709944841	-1.36553005598896	-1.51463882021232	-2.47791451245004	-1.20857875539398	-1.68902880851667	-0.623881441763069	-0.904474455469401	-0.454751897778187	-0.31618148061013	-0.389380721349065	0.0661731119741008	-2.1845383116847	-2.20537234660867	-0.0741713083930048	-0.55887423031887	-0.583402300565665	-0.291211271004028	-0.700258168379734	-1.25379933700128	-0.790444438630379	-2.33386882618485	-0.334152191429741	-0.156070905824372	-1.65395211464739	-1.91371505401891
CLSPN	70	-0.88086187734691	3.95834916930083e-11	1.48568699278225e-09	-1.26753694198295	-0.204516319570963	-0.701353913520483	-0.481438495613051	-0.0989539439734827	-1.33467003553162	-1.36643267401734	-1.02546821492763	-1.97085553818459	-1.11923663204027	-1.52060487186125	-0.607519267447167	-0.354473060231701	-0.0281232578204532	-0.259513391848865	1.47972689837128	0.490567143870706	-0.107192507198255	-0.213958228933207	-0.199609608716215	-0.50777313829419	-0.982787353395553	-1.85375424837668	-0.855449933312435	-1.69159450890509	-0.957559919579117	-1.15498179546424	-0.754487643955834	0.0550593110267487	-0.0169442008658864	-0.174877481605492	-2.00289483826125	-1.75571876388117	-0.0243525366776271	-1.12470856159324	0.338262553536803	-0.101838221833266	-0.187060546333471	-0.235839551196434	-0.256052894787032	-2.99819218815491	0.219570940467363	0.0741858967060803	-1.32566421694242	-0.643000303890241
NOL6	70	-0.883948634164246	4.32905383746294e-18	2.13393493828007e-15	-1.28259740794967	-0.267552109383374	-0.385732035583426	-0.928284642822276	-0.287469623994889	-1.27211096945097	-1.41686657463107	-0.357157596180318	-1.6858240362535	-0.599658491367563	-1.08464904951113	-0.238333783851224	-0.193827600609798	-0.210047408017339	-0.318652731012624	-0.424245912760077	-0.576844535256456	-0.541723105564862	-0.885077509354217	-0.492962810018098	-1.72311388773251	-0.766139932013475	-1.91674905504238	-1.37905579906897	-1.74543144912788	-1.06764163299538	-1.09893269207655	-0.251012627729908	-0.0182208097962694	-0.485534576573423	0.497857464287329	-1.38992523166724	-0.832203239237605	-0.103764267519688	-0.858763826286268	-0.803768866149324	-0.0336634583668739	-0.469690621890954	-1.72211249463718	-1.05360555725876	-1.60504736631747	-0.477745584711208	-0.0534928695591584	-0.799625601006308	-1.41749738551369
CENPM	70	-0.887094065347267	3.12950987566711e-11	1.1968756562422e-09	-1.52265374320156	0.04943321732127	-0.84345670179611	-0.829386387402489	-0.307909404022984	-0.626838309243352	-2.92046572489167	-0.260546511095645	-1.72376715223655	-0.716751223324152	-1.95577860473528	-0.104715625418708	-0.720526770951656	-0.0215205562874881	-0.218131715477011	1.56051875148475	0.177222250365166	-0.0685977460953665	-0.213661585804886	-0.592966256236247	-1.13571972199614	-1.12506279990913	-2.186828879772	-0.595523619920716	-1.50296648792922	-0.77126704685184	-1.17519471329403	-0.35108768113571	0.194173049340223	-0.0677008616760342	-0.876832365423812	-2.66953307012148	-2.80261486220998	-0.283811493671787	-0.598067784316781	-0.513569229180482	-0.273677579220233	-0.517496768049434	-0.539336247122463	-0.505098150394571	-2.54636539643567	0.061177320317159	0.143040891775137	-1.17799954061627	-0.0321972479331589
GINS2	70	-0.887215788116586	2.99142440239964e-10	8.0431243750338e-09	-1.54555715827742	-0.126928309262558	-0.763656683054584	-0.319018860614579	-0.217503459880239	-0.806420201323385	-3.00319221357394	-0.411668725246905	-1.80550558909007	-0.987055667846778	-0.828447199205511	-0.531650859643177	-0.317511592296882	-0.105771315719167	-0.21453412219581	1.82926900382501	0.529713284042771	0.127288829813033	-0.402734679878584	-0.607080415836576	-0.459456083598972	-1.21124456254775	-2.43236122805794	-0.295280670606692	-0.679644004256057	-0.238021625837618	-0.458861355173555	-0.658827425962335	0.0715579738999807	0.152605062463656	-0.0895380064917282	-2.80614264788013	-2.53369104322092	0.00295829425061169	-0.654528867828197	0.490957562432041	-0.164582842097475	-0.566710937153193	-0.894417598928787	-0.365918647270583	-2.61868766085228	-0.44641976115469	-0.0296634375463206	-1.35447844648393	-0.481986386951549
ZNF367	68	-0.888847061902429	2.16731076686043e-07	2.36940795616057e-06	-1.10721235452785	-0.0612669428833017	-0.50173004177	0.341913462850287	-0.240960768849958	-1.50660249674218	-2.74278338198643	-0.187051665830647	-2.21438906370456	-0.753162858951555	-4.9158708327312	-0.794253617371654	-0.811408866339774	-0.0614603625590926	-0.599176327837949	2.07384254124055	0.819301537889406	0.0463293339032648	-0.14300866283105	-0.178788278504341	-0.062673011135975	-1.37860815437681	-1.84476239616413	0.421468460175812	-1.3383386772999	-0.219948635852847	-0.449542731669472	-0.925053766277429	0.642468486511017	0.333757220951171	0.531478175331797	-3.83093083624168	-3.4259949306365	0.0672109044467767	-0.729606560802291	0.447480173838321	-0.0300440461186924	-0.099051124580457	0.25422709071488	-0.0585456227408837	-2.10490506693754	-0.443532412108987	0.111777455560503	-0.621947629850342	-0.704905125352025
E2F2	68	-0.894356480301722	3.41637962951731e-09	6.53294249499595e-08	-1.3006322031822	-0.625056610618709	-0.74354734849054	-0.53522770712874	-0.169036055182124	-1.19840731927777	-2.01321994763182	-1.10616073554255	-3.21208646281463	-1.29804929896023	-3.15776870317724	-0.734369727479958	-0.662980327129783	-0.21739152548239	-0.921985775954103	2.43313712175524	1.4445530685531	-0.0658719706316521	0.0461702212556313	-0.122500974138378	-0.662437881525323	-1.7055581730246	-2.56607609730228	-0.0890890809778711	-0.578032589030517	0.174846533626633	0.0216067231745149	-0.560878687230467	0.662053636332086	0.603631324418714	0.746917317879301	-1.59494446029433	-1.35882683471597	-0.0566413434222254	-0.778749348624225	0.533181672267817	-0.266448427798097	0.147504573126394	0.0462419615347366	-1.09789647940369	-3.47834300729208	-0.524233422666672	0.159568002438334	-1.612036442435	-0.84621077982597
WDR62	68	-0.90117390509242	1.85586923752431e-09	3.81174920618188e-08	-0.606922458052576	-0.409698772249784	-0.727987263426457	-0.129482266007924	0.383416117472688	-0.575561014378025	-2.48132170051108	-0.734365506291	-2.00888786877833	-0.263744157395393	-3.60295078919666	-0.616170788021275	-0.73167835351198	0.244468929100938	-0.172682528427769	1.13636619477444	-0.166736987638683	-0.0798663799576303	-0.141446166594654	-0.713776010215336	-0.866708159666368	-1.28413858106077	-1.23085215247437	-0.537546642018952	-0.974710050070173	-1.35307424124929	-0.756409369802305	-1.06640577397413	-0.281295648930906	-0.43036119796335	-0.678274191648073	-3.64055815779608	-3.93274482254502	-0.117719680454203	-0.957890647685396	-0.00699952031872702	-0.197318313949147	-0.026973609816708	0.135810832359524	-0.743863656060591	-1.90915741636806	-0.0650891205761451	0.209940107971685	-1.96795034883063	-0.286617518627477
RRP9	70	-0.904051686582347	4.3209895595704e-15	7.26122654624171e-13	-1.06661305563779	-0.343519037804557	-0.606300705302653	-1.28546040453364	-0.726651504298661	-1.22076384534577	-2.37256675295157	0.0361660082534717	-0.496172038202083	-0.48554769700618	-0.5882206526979	0.0139475683223089	-0.195879168665069	0.104402060068229	-0.330588599046917	-1.25188968291057	-0.477103429203817	-0.698873082277991	-0.912620238790193	-0.617489619410426	-1.73467383259931	-1.29363687659223	-1.42053922334255	-1.77002857611964	-1.53704088742182	-1.13985421611848	-1.2920215038151	-0.128294179137545	-0.355610700808283	-0.620612397676375	0.198894372410087	-1.78239899549852	-2.39579489188384	-0.163098140188639	-0.518670561894183	-0.585084750568975	0.00207053045655058	0.495486842441984	-1.63753118158634	-1.09488738350579	-2.61590344308454	-0.49957686954016	-0.183002295980049	-0.718311951332441	-1.21446487316593
POP1	70	-0.909676662609285	2.31479596693875e-15	4.14087130150286e-13	-2.00133481568919	-0.46370091079006	-0.526014397738259	-0.337516786368815	-0.594127478232186	-1.07633102730739	-1.83865726765869	-0.824917851064038	-1.81594332725393	-0.508510235773348	-1.19959730692625	-0.323158217939338	-0.545923945613279	-0.614528260451849	0.00113494504609865	-0.0451710927390339	0.0188184205914853	-0.561677269386396	-0.893960625823814	-0.270134650890709	-0.840723503537334	-0.378133935956474	-1.442895223449	-1.89404833118794	-0.7435303142592	-0.661887787436062	-1.00859946521597	0.0236464535962691	-0.643327439555504	-0.637619882283386	0.0728234464561926	-1.27862621153351	-1.50822221499409	-0.311434554990757	-0.740492413629237	-0.253485702801474	-0.621725705895943	-0.82843203458209	-1.6347939837299	-1.04219460147848	-3.12217053709228	-0.117182193162158	0.0562971410212539	-0.816452907651971	-0.496887670835418
NOP16	70	-0.911275127724416	1.07490779773087e-14	1.51870094071759e-12	-1.47821903016027	-0.00230841915285764	-0.63222646443033	-0.749409257789984	-0.407407523480052	-1.34493210550143	-2.12590288440821	0.0484200954926393	-1.6136109564514	-0.327372117413909	0.230042064282058	-0.176156194832692	0.0432379091448359	-0.16362642146449	-0.0481010940546065	-0.628898738947167	-0.829353412701173	-0.602837279699962	-0.586812215908171	-0.477023375478134	-1.29490155856145	-1.39348134592731	-1.03013527297959	-1.44957008413296	-1.26907432059821	-0.725125853252744	-0.965799022776754	0.00507896309089883	-0.0911974665517157	-0.423153533322239	0.792953479709056	-1.85105575529367	-1.58609913937073	0.0612498817560831	-0.714661748760148	-0.688785151870079	-0.191802584137695	-0.852117797638967	-2.22395078125998	-0.848021592797863	-2.93827519784009	-0.399355498692858	-0.0917778888851597	-0.90812998636597	-1.26937232012143
SFXN2	69	-0.913939381122546	1.90862979919227e-12	1.1112132862384e-10	-1.67952846785377	-1.11620698923552	-0.859708392090965	-0.563871194007517	-0.272905144752497	-0.693317827203851	-1.38530762545522	-1.57827041808768	-1.47877948993694	-0.385622774472862	-1.44357626560448	-0.387908573919543	-0.098775823575911	-0.39071180169144	-0.394996766832704	-0.763605491294697	0.929053028136219	-0.577429747836259	-0.5874722841044	-0.308340673915393	-1.26497975293104	-0.13063234106896	-3.47385817350377	-1.82233512782991	-0.432055870947389	-0.217227952730793	-0.260763526452596	-0.320810172625513	-0.399136672725215	-0.332477983541414	-0.619416101250661	-0.948259059316044	-1.04341736856383	-0.731607613116913	-0.985772595437472	-0.542140566914393	-0.338020166913771	-0.179928165536827	-0.845064734151807	-1.09874970657533	-2.78014294860761	0.400028817101324	0.517383059901678	-2.60039171300231	-1.00422686585966
SLC25A19	69	-0.919268533576767	2.21516701339372e-14	2.77609235542935e-12	-1.85395967447615	0.0678101998896903	-0.897769376381414	-1.12740407038255	-0.591738511390075	-1.23455108119364	-2.28266229127821	-0.278881740569311	-1.18437813769182	-0.565497303455693	-1.24856214185271	1.56387896898786	0.834025720545098	-0.162385392285926	-0.178797427909035	-0.488882850575219	-1.42205981323591	-0.385983245349316	-0.363142483106037	-0.523852535850981	-1.34661088871571	-0.909994678064841	-1.50285593924177	-0.441611166362225	-1.53076508223121	-1.33906395546069	-1.45401204313118	-0.636676253309925	-0.326978401565024	-0.290654638784314	-0.304049535950555	-3.69540049343652	-2.73285389787092	-0.333217867616165	-0.681034886681294	-1.11831978845577	-0.24598705065914	-0.701950278282446	-0.756704960902535	-0.746279480838	-3.63978155647651	-0.497819339805239	-0.132017662956015	-1.11558092757664	-0.366999350084889
CDC45	70	-0.920747294243122	2.13465000770547e-08	3.23961414814159e-07	-0.956494101809887	-0.369634287954064	-1.01855054573168	-0.508040786654591	0.404009771423556	-0.67611637915747	-2.51073296840836	-0.760914322586492	-1.40671390607064	-0.353851667377343	-3.44013100751904	0.0775814665622101	-1.36662091516816	0.0755426828835172	-0.240684289787943	2.29134713419467	0.482436202556112	-0.0110058984569343	-0.134275497201407	-0.27887992569939	-1.39382826280276	-1.78618570623014	-2.63538933273099	-0.281447722054573	-0.672741533600842	-0.2980581481848	-0.54406168828723	-0.316343231623134	0.127229954083121	0.132459967700482	0.139906361399699	-2.26443185548891	-1.95056711628791	-0.287392393348774	-1.89075793514584	0.519892166591438	0.171966441302886	-0.30843212848106	-1.11880211838198	-0.316289441995639	-2.61638770601404	-0.0717704863907826	0.0925748661701547	-1.40465301799465	-0.834585555433334
MARS2	67	-0.927598129322902	7.52342174819289e-15	1.12759825147578e-12	-1.88044424092283	0.0977175053022749	-0.738044156189739	-0.823058491382685	-0.282032966275295	-1.91674270767971	-1.82884386074736	-0.119061356702323	-1.58015707350559	-0.297525384417278	-1.22766238999746	-0.247669677235769	-0.170807099734328	-0.226304675116379	-0.242655961000423	-0.847159064949323	-0.586745930024333	-0.611024970788776	-0.329793417940054	-0.652817319945691	-1.20784672742064	-0.684926656927822	-1.41796202943051	-1.37866076687348	-0.971250635744554	-0.659418223037958	-0.531810495899359	-0.219305340828294	-0.117177890116327	-0.352881665846251	0.460280294544011	-2.32865646232598	-0.713790066343477	-0.132734762258201	-0.87626700093764	-0.790182631732239	0.0734425898027977	-0.341444862621178	-1.58872069105113	-0.851984119056833	-1.64619645598221	-0.527638311336597	-0.260447538658528	-1.4127418522479	-1.80028230482803
PYCR3	70	-0.927843334800294	1.49926740896782e-10	4.53707362424613e-09	-2.54430256733583	-0.269897659880962	-0.127192119576662	-0.63403106396155	-0.683747818583866	-0.753558296819819	-2.18500068445312	-0.939339551323792	-3.15096474302389	-0.140016087549825	-0.874293735947781	-0.110769763575669	0.0244260379274539	-0.149027897572024	-0.404425853911481	-0.273109525385826	-0.553929479917387	-0.313468426977895	-0.2957466009078	-0.0602269522383935	-1.4939554519923	-0.635583036945151	-2.86707008719244	-2.00510728862652	-0.548090267276828	-0.332251669705251	-0.353766199470826	0.0261777960439739	-0.403720665672836	-0.386570380973825	-0.231834703830812	-0.891793434939924	-0.42522339693545	-0.236013836304726	-0.0984263505344364	-0.61462582855355	-0.104451037202635	-0.283762414879707	-1.67880483102746	-0.848623116526235	-3.4855727047207	-0.0502728390883569	0.233417617574022	-1.68974910749963	-1.76148613394235
EEF2KMT	70	-0.931341127874555	7.09100843298011e-18	3.1458549812073e-15	-2.05322268317416	-0.172696915900163	-0.371309584463356	-1.20869842937565	-0.88842636630217	-0.954063590099909	-1.36384262074028	-0.770573190822191	-1.7586933220602	-0.419298760580593	-0.977502855260872	-0.403863209640186	0.10787947666159	-0.184363543509219	-0.244518095898871	-1.08814079109717	-2.00538453144812	-0.913761367982794	-0.72469474069968	-0.432961094885137	-1.42434797201815	-1.0643117518433	-2.20044222325555	-1.43020083995179	-1.56098521793536	-1.27286656385615	-1.27408655786973	-0.635671776140558	-0.326012112853209	-0.401568804617883	0.215652068465783	-1.75089682640524	-1.9078333031388	-0.0264628357054343	-0.930061290334784	-0.763570045593375	-0.214827325604212	-0.620198679948826	-1.55562294734818	-0.762604131489566	-3.00793046990539	-0.570366616529185	-0.106137779848075	-1.1175661561706	-1.14218881100271
URB2	70	-0.945077007076573	1.06394190665594e-13	9.71208204668398e-12	-2.52406102294111	0.0125262325856576	-0.419356693693785	-0.519988063110119	0.0836114397067702	-1.3880395706147	-1.68318488671928	-1.08570021139513	-2.44675424060153	-0.520782704684705	-1.51884666754182	-0.267749577591109	-0.235583785197504	-0.16941549174727	-0.334832241985748	-0.714402046188742	-0.383964080270999	-0.379181104611956	-0.302776183373222	-0.473262586028588	-0.988690557880214	-0.66005477572269	-3.09531178258941	-1.16834903392568	-1.59326530535415	-0.777957854114139	-1.15055181150884	-0.334713198691753	-0.1866107875398	-0.13863101575966	1.00709512691549	-1.25810007007083	-0.609084609915128	-0.00495290001356746	-0.79872869326146	-0.789389078291448	0.0197152854168595	0.00613856102682532	-1.66912541848494	-0.867177841586089	-2.46187103587069	-0.347899949355609	-0.0462367224962278	-0.988695952460794	-2.17351080719436
UHRF1	70	-0.947196689561664	3.65382537393634e-09	6.88607939206932e-08	-0.65387105846858	-0.242355214589071	-0.554801641632779	0.00125996798984302	0.161643276343722	-1.44220003887873	-2.77457593546102	-0.960055575609226	-3.13690332037032	-1.06573601995614	-1.42639511720639	-1.04738747049541	-1.45447041157786	-0.00364091048109571	-0.234045227124109	1.6296779268395	0.946495540445379	0.163082470789968	-0.19685766361213	0.112821799708717	-0.583861318654399	-1.21999166177601	-3.04371321626313	-0.151420111038839	-1.44826818670649	-0.579966063229384	-1.10104962714151	-0.882883118037553	0.114687191987429	0.149215853185275	0.408463713102104	-2.32726136992444	-2.6226726269329	-0.0297997707864333	-0.628835837149106	0.51464885708141	-0.10274588530404	0.736472344647969	-0.940251029112444	-0.24300074138234	-2.23394756110218	-0.20745675701795	0.145314289644115	-1.8370542487618	-0.264790714032304
DSCC1	68	-0.9718620619459	1.36036891728266e-13	1.20702813292656e-11	-1.61819985877915	-0.0635267028142048	-0.725149261245809	-0.256782909525089	-0.546765403795494	-1.2769311663419	-1.08163852541729	-1.00631952448198	-1.89287797276881	-1.31549124344797	-1.19334275322941	-0.99407856921927	-1.04975375911632	0.00154978753361067	-0.479686898284239	-0.377511360858589	0.928645316408916	-0.366460219506935	-0.341890739284343	-0.400299699432206	-0.658302347326607	-1.25650001196331	-2.22403799173291	-1.49911652504229	-1.66045392272573	-0.992887406144781	-1.19683522534031	-0.769003010053774	-0.287565948617317	-0.55817759985231	-0.29483349125768	-2.91464296016618	-3.05198468129764	0.0657146874824951	-1.10937597205842	-0.0341683562233656	0.10379656759462	-0.460759493864265	-0.646832101747555	-0.498659561528092	-2.0551068177746	-0.205005395902826	0.0404169796555937	-1.01138147934636	-0.633984821295568
PPARGC1B	67	-0.974587373013206	6.91847092261786e-10	1.63941613242711e-08	-0.514530045486742	-0.458170462351498	-0.839412406504771	-1.06141119228756	0.310084830317599	-1.9346064262513	-2.42566178292223	0.0137678744461211	0.767287047447397	-0.704149302631154	-4.01094691972755	-0.0997080614959277	-0.0548405331851229	0.973301409490278	0.15088239690492	-2.33012683330944	-1.18157906474244	-0.853347059697225	-0.276922560587216	-1.25304215268055	-1.19962740746832	-1.06746518840399	-2.10944605407954	-0.505312607007226	-1.49293052701497	-0.931514303422874	-1.10722493043513	-0.225532301902245	-0.0762026188276143	-0.141507081058862	1.24268182257751	-0.939233478574746	-0.433453589955012	-0.238795129195382	-0.494014302053374	-1.20118205947776	0.748230119034358	0.0314314822592536	-1.04113978235999	-0.74089150411169	-3.45501482133421	-0.271025223033559	0.0794800093902815	-0.593061307303529	-2.45773759004568
CDCA7	69	-0.978883073987923	1.54869920299996e-11	6.58108155573663e-10	-1.06976796102658	-0.391647451492381	-0.398490835708908	-0.652785679439059	-0.99449319610739	-1.11504441845789	-2.12861285999888	-0.447249074379326	-2.17360907120531	-1.13933440459811	-1.57165871203713	-0.789450552091324	-1.26371361036722	-0.438645076211173	-0.316178891051749	0.804824597165021	0.469479838710016	-0.102363131912758	-0.409844753990034	-0.4530162169781	-0.81918831738286	-1.53651524466114	-3.12501623834843	-0.378517199850295	-0.862650925545373	-0.134444884250731	-0.397549993533005	-0.551491609245066	0.285738082114276	0.183476681517704	0.698694605301655	-1.97467748921387	-1.57015177807558	-0.0635513907338409	-0.637579913450589	-0.124665806063238	-0.515826828247502	-0.32990375609158	-1.17271173124841	-0.0259077190231983	-2.44838733331683	-0.388113621743941	0.19073482378811	0.652410691798822	-0.774258286780355
CDC25A	69	-1.01653601157239	5.98493388424989e-11	2.08410994380582e-09	-2.27092526598142	-0.155318616831945	-0.479436258616926	-0.273954898937545	-0.0842495957580843	-1.54888889315815	-2.05026363547117	-0.776696507169546	-3.00566699278849	-1.26672307225058	-1.07061060991693	0.0542118108831731	0.12298489440047	-0.793800706890741	-0.260841524060063	1.42130433695364	0.330705693949856	-0.212710387910166	-0.358509064423145	-0.455692432230147	-0.898597024069028	-1.37624094602497	-2.7044238817481	-0.531693617482272	-1.99063084094923	-0.620721036202611	-1.13433264006968	-0.820163482631959	0.355681258227618	0.062714279846093	0.233555657435981	-3.04191805804044	-2.78308713975485	-0.145812432499749	-0.823140537858583	-0.108448595219427	-0.344550888486078	0.219313894842108	-0.906059926154694	-0.422047150237441	-3.3953633721996	-0.153395482300824	0.0746362853043433	-1.73734823767279	-1.15705260076154
CTPS1	70	-1.0291411985709	1.81661815077385e-13	1.54391662147377e-11	-1.9708936390422	-0.415774461697425	-0.739950866559545	0.210966262743691	0.0808791640781489	-1.35049506844133	-1.68388653649556	-0.89778617803142	-2.31582327110952	-0.675307580384104	-0.725212841225677	-0.696546279847049	-0.844821330590807	-0.121854180391855	-0.0602212350952374	-0.418023713953642	-0.617760632036411	-0.219693618527686	-0.331184416787115	-0.477791735843458	-0.985352481234812	-0.279468887798459	-3.90706515739018	-0.852720146639234	-2.32009801901156	-1.11254491467258	-1.73849364646204	-0.139345539760787	0.180643474535019	0.0725525044731342	0.19691549692974	-2.60652921943451	-2.07841152547891	-0.0974015597059891	-1.27995259088444	-0.714494087611737	-0.0836834200811483	-0.385959307338256	-1.32053708373826	-0.775324331328081	-2.35606673179892	-0.182671690979614	-0.0745663048919723	-2.44815862166092	-2.08546868123825
WDR4	69	-1.0298806187804	8.75030344232658e-17	2.6229625805093e-14	-1.72939331218433	-0.199348751394794	-0.466079333684491	-1.02085524095229	-0.661980550397673	-1.36758711236084	-1.87565039931279	-0.787394525081604	-3.07448636254015	-0.728251448644676	-1.52386907108616	0.0434982355673171	0.0321337324546675	-0.261184652341594	-0.240238079257446	-0.586013010831693	-0.0771918998680917	-0.296226335482076	-0.549914122744213	-0.318213437522707	-1.13170978315504	-1.36899811738312	-1.81872574890102	-1.17976781663147	-1.26086136558319	-1.40463625755119	-1.36562440293192	-0.52646509222184	-0.956757491948403	-1.06132718337618	-0.0353994409519928	-2.42680065897611	-2.74600338318154	-0.0809671056935705	-0.493564194293249	-0.58976955414759	-0.0367776002742286	-0.579822993529529	-1.46812634965828	-0.821863461279998	-3.05741315980966	-0.532128349612615	-0.21785999197837	-1.00571096254681	-0.843639622200611
AUNIP	67	-1.03167082885188	9.51742346052752e-10	2.1175073941968e-08	-1.90288134601565	-0.220016778689372	-0.751798792736481	-0.220927126540598	0.0122785861081902	-1.39984962356355	-3.21590450197114	-0.91729043526806	-1.89255388526419	-0.391026657314479	-1.51620409759113	-0.754331677284049	-0.724406479295088	-0.0212755907114751	-0.413081788094644	0.874045008853153	0.210866866458387	-0.176654361668433	-0.0574930780071708	-0.411199123534087	-0.433258234787412	-1.02752919470018	-2.63163764204669	-0.397117334096615	-1.28495087875541	-0.731675218209391	-0.671464076917009	-0.861313501746163	-0.13876611178281	0.0574416599875617	0.177920758932892	-2.69868518628728	-2.0579156852544	-0.239210904066744	-1.18015582235802	-0.0170525951887784	0.000380207801437809	-0.349610022640251	-0.456187511238407	-1.05485204141077	-2.40932782724436	0.277866528378211	0.212500998453247	-1.34991763678664	-1.09811983739353
POLE2	66	-1.06323630927257	1.1785088524285e-12	7.20156566517054e-11	-2.04465221051189	-0.438113762605664	-1.17200310966433	-0.250714428146813	-0.859197272052911	-0.92720288569584	-1.65289428372143	-1.3020843051995	-3.06469992584348	-1.00683505103184	-1.24122856515809	-0.703757679214185	-1.00472865234236	-0.358998564597951	-0.247472024910484	2.23841959190711	0.10395742412829	-0.116076961283652	-0.543263445347325	-0.697184114560091	-0.921260387892974	-1.22800672359573	-1.65050958694281	-1.1966331797288	-1.33979059390965	-0.693496377611872	-0.85082103271359	-0.702377400258345	-0.357819425669159	0.0600811445594057	0.0504746134623429	-1.40951071057921	-1.68938353137899	-0.215537920417077	-1.02073971746148	0.26608083183334	-0.51584825927018	-0.363071867174685	-1.01190544309428	-0.346812320866342	-2.6229927510027	0.00901032358296029	0.133958748810917	-1.16946367609056	-1.7520583253835
SCLY	68	-1.0992882530161	1.19558880314432e-13	1.08247146250398e-11	-4.24563759275913	-0.190063542973306	-1.1872863119797	-1.17955220094617	-0.515220178379011	-1.00449212232355	-2.06465807233586	-1.50157722382106	-2.8191986511476	-0.681686546603991	-1.50006773298686	-1.17442366234934	-0.374847190808869	-0.0971553544468409	-0.451125970104259	-1.11744764201708	-0.237330133385958	-0.633529888630502	-0.554761829600031	-0.827545999685834	-1.77365515487281	-1.07813232127442	-4.04092621828897	-1.99231326704949	-1.02431044943022	-0.644349336988545	-0.681497001340187	-0.691074583527645	-0.717516545320883	-1.01945925028914	-0.247430135872962	-2.2215875212656	-1.84156444481414	0.0261937194256098	-1.02894079597725	-0.0546400127381018	0.196272885466393	6.67725496295973	-0.86714393772312	-0.478150075620221	-3.28353057938232	-0.28878062856487	-0.195299809272181	-0.990281046894331	-0.802561606378181
GPATCH4	70	-1.10852756881758	3.77955792256357e-17	1.37439596456238e-14	-2.50609632174915	-0.209956816242973	-0.670610732559948	-1.38918758003749	-0.404016438651001	-1.5009678751512	-1.52673506304859	-0.990432499014861	-3.2306384775068	-0.610055682948478	-1.17049998189744	-0.653790305495039	-0.378108864098341	-0.137508312751502	0.063523977327232	-0.905786074313217	-1.1252818096865	-0.626417238627755	-0.779171320783559	-0.295917800685856	-1.29378684411361	-1.36826629459821	-2.47682038557814	-1.53869211086656	-1.82497440679423	-1.23519910348889	-1.57360397183216	-0.20591455488647	-0.0330365046178743	-0.282521705318173	0.096284062772009	-2.15272844492215	-2.1082228502627	-0.140202197753499	-0.928150700219909	-0.438570264151667	-0.132053615725407	-0.80060074341525	-2.03943292027717	-1.34462961031347	-3.61132753072227	-0.459823178283507	-0.0305877372424243	-0.860874952740029	-1.78750718168532
FAM111B	69	-1.12044708291294	2.35941827725343e-08	3.52910426338742e-07	-2.94174275149353	0.0210153083580382	-0.538150560690611	0.114480202251345	-0.639694399393694	-1.21026435568733	-2.33712020493225	-1.34618654369903	-4.0556708577466	-1.27880797675821	-4.81941042325828	-0.86131217807456	-1.03633972924446	-0.801958146341266	-0.56071585820219	2.17212831172755	0.821379517564242	0.000509128240589405	0.041224149936464	0.093743606392916	-0.336629974578546	-0.499015727918375	-2.09024037870255	-0.825117348863766	-1.12797760177631	0.0760573624910111	-0.899204902243286	-0.274731840088629	0.968348790144002	0.679870024231013	0.841329057489626	-3.42659668980077	-2.88438382195576	0.125901804256495	-0.658348128680546	0.709311221421471	-0.709677875624823	0.485279648297824	-0.636375811957092	0.056755241398535	-3.41051978331246	-0.497508234453236	-0.0861950397435693	-0.754567617439119	-0.561546949006128
RRS1	70	-1.18518286498192	1.06217892300973e-16	3.02067344489767e-14	-2.07006861216082	0.0388765300739694	-0.341141163378546	-1.21806963669224	-0.55473816674458	-1.43610944877581	-2.31685357701929	-0.50298477626239	-2.42760992278224	-0.605017783729313	-0.448108746007303	-0.607097707331383	-0.662267225718525	-0.424746225009407	-0.362395546413517	-1.32110860470058	-0.715850746343883	-0.756927605400983	-0.771694159286668	-0.564359310201418	-1.2734947885942	-1.91434971168438	-2.20563454267752	-1.63076344431869	-1.48495353923482	-1.09073358766113	-1.10868726109389	-0.399060085750342	-0.651280295691996	-0.678583011058321	0.573521322779486	-1.69248859655897	-1.55914875494894	-0.0770218893678391	-0.987005263843795	-0.753916169088503	-0.155525029518243	0.417576649371242	-2.1867140717742	-1.16719693017982	-2.74934280397479	-0.388986444903332	-0.162381561390271	-1.24673816093259	-2.37213950635144
MCM10	70	-1.20540910511772	3.75957208633834e-10	9.84590649576825e-09	-1.98295111252605	-0.252346067541686	-0.862929584195975	-0.67988470530413	0.0423533165134305	-1.68270184976767	-3.47158983822059	-0.961347575851195	-3.11985635929227	-1.22614446653795	-3.69445292896002	-0.510279954617495	-0.830382271622164	0.107444029784837	-0.383224896116137	2.38279677219163	0.619616216692268	-0.100180413507687	-0.414367192404309	-0.310279716831551	-0.810913597524823	-1.41258849344048	-2.64416880743319	-0.178502927785554	-0.825409968671573	-0.404760002309411	-0.658842383396522	-0.837178266922528	0.138737830242595	-0.0909558153546293	0.0537856892248555	-3.12779321795085	-2.81521053004319	-0.07542407563834	-0.985753888261338	0.484941406153477	-0.178223362132178	-0.184388663760111	-0.558147337277997	-0.767815258799567	-3.9655128776646	-0.205482457816689	0.0269526090097534	-1.36952519405986	-0.644019359854069
CHAC2	64	-1.41869478062817	5.78008440670027e-15	9.09317959641316e-13	-2.20921405244257	0.000400355707404542	-0.589615550013281	-0.477994900927007	-0.699057448686775	-1.32128839214937	-2.84765724668827	-1.55209644632589	-3.75649120762445	-0.9576005341784	-0.673790720647679	-0.55719317685226	-0.296739266877468	-0.68793189849555	0.0607390713488771	-0.447844744203623	-0.330545862731599	-0.573542924664835	-0.633775909817022	-0.994436155521043	-1.1842245500162	-1.36108089304721	-5.04460651885253	-2.0211217896383	-1.22411796166258	-1.1370339530211	-1.58675481960844	-1.91452463992034	-0.872217489621182	-0.695207768782683	-0.455807306110974	-3.09946622235571	-2.84234560731717	-0.148073328649512	-1.09280418233089	-0.409349010166701	-0.616152924894004	-0.530418289508942	-1.70771442509796	-0.943087570911628	-3.15571362610697	-0.0375688258359939	0.0453502967491528	-1.97306116309897	-1.74691706269653
KTI12	63	-2.09270837148572	1.76418406069915e-05	0.000116210046206147	-8.53465483699684	-0.0602414084387354	0.0990298719530731	NA	NA	-1.10000545980558	-2.01833335387103	-0.0382234118964243	-2.84155888865474	-10.5407947620632	0.367856558609853	-0.971865733017796	-1.51102099338581	-0.280011981609385	-0.170579607166176	0.790956524664175	NA	-0.233380130898934	-2.08045227710405	-0.83432616732474	-0.739614693611621	-1.16322264424096	-10.1264687473952	-10.9448637622093	-0.704027399716496	-0.319067319242314	-0.471096081984842	0.202507776559364	-0.0655005649072747	0.000360488247384821	1.72336204818623	1.66683583035751	1.60317041222494	-0.0879406451639246	-0.427553867725214	-0.659473776772967	0.424364399951967	-0.563615269576124	-6.7325240285228	-0.576760290443926	-7.68915342108528	-0.277031066321228	-0.0998306502497496	-7.6935077251844	-7.29455156609514
[truncated: 25 more columns]
