# Supplementary material for: Formal Meta-Analysis of Hypoxic Gene Expression Profiles Reveals a Universal Gene Signature
Source: Biomedicines. 2022 Sep 8;10(9):2229. doi: 10.3390/biomedicines10092229 (PMC9496516; doi:10.3390/biomedicines10092229)
Supplement: Supplementary file 1 [file biomedicines-10-02229-s001.zip › S10_MAvsHM.csv]

Gene_Symbol	N	pval	adjP	Overlap
ACKR3	48	0.00104757241599355	0.00422879915042201	HM_only
ADORA2B	62	0.00197870052927738	0.00736311611146298	HM_only
ALDOB	8	0.602934888202258	0.724692080648784	HM_only
ANXA2	70	0.00308717073459223	0.0108302421690218	HM_only
ATP7A	68	2.09376529180779e-07	2.31294331189644e-06	HM_only
B3GALT6	70	0.000537887506908591	0.00236078762925334	HM_only
B4GALNT2	53	0.050794958534281	0.115325872078549	HM_only
BCAN	31	0.537490295563471	0.672454017833554	HM_only
BCL2	63	6.7289444343934e-08	8.67294860219142e-07	HM_only
BGN	41	0.0152332206642786	0.0426484034803772	HM_only
BRS3	NA	NA	NA	HM_only
CASP6	69	0.00130754911632154	0.00513346097314062	HM_only
CAV1	66	6.34156949903706e-08	8.24069681474166e-07	HM_only
CAVIN1	69	0.00506218829856941	0.016610866987998	HM_only
CAVIN3	55	0.0357480449973751	0.0869191202599775	HM_only
CCN1	NA	NA	NA	HM_only
CCN2	NA	NA	NA	HM_only
CCN5	NA	NA	NA	HM_only
CDKN1A	66	0.0297779042070699	0.0746787417887194	HM_only
CDKN1B	69	6.43641305241822e-10	1.53849692164592e-08	HM_only
CHST2	59	0.800854520261439	0.872265293549998	HM_only
CHST3	63	0.00397447225248591	0.0135051690417651	HM_only
DCN	30	0.130549371228343	0.24324621189308	HM_only
DTNA	63	0.000354592013502517	0.00163791449252395	HM_only
EGFR	63	2.05973387173179e-07	2.28130513708869e-06	HM_only
ENO3	61	1.08031085318331e-05	7.55944963574514e-05	HM_only
ETS1	64	5.60853057524486e-08	7.41851074657612e-07	HM_only
EXT1	69	0.0477302438725839	0.109601684221704	HM_only
FBP1	20	0.107646903600931	0.209586905615364	HM_only
FOXO3	70	2.59384555399531e-14	3.14408098790841e-12	HM_only
GAA	69	8.90819334717359e-07	8.34465983222148e-06	HM_only
GALK1	70	0.447066815234999	0.595729175457107	HM_only
GAPDHS	20	0.0107892271344498	0.0317156952420309	HM_only
GCK	17	0.115205560657359	0.220891152779111	HM_only
GCNT2	62	0.00122666695957891	0.0048537150369924	HM_only
GLRX	68	1.86026377700056e-06	1.589536637189e-05	HM_only
GPC1	68	0.761496127342937	0.844068913487958	HM_only
GPC3	21	0.0115968236665736	0.0337188022770921	HM_only
GPC4	42	0.837565395618206	0.896793725230634	HM_only
GRHPR	70	2.76218214293219e-06	2.26676745447731e-05	HM_only
HAS1	11	0.569228006566692	0.698374758941503	HM_only
HDLBP	70	0.033972109196666	0.0832949404443955	HM_only
HEXA	69	1.09191407923248e-06	9.95104277137838e-06	HM_only
HK1	70	7.58156075445062e-10	1.75725728401161e-08	HM_only
HMOX1	67	0.404800120037616	0.558034924706316	HM_only
HOXB9	50	0.328045396816365	0.479740439885325	HM_only
HS3ST1	50	0.0414494141935862	0.097915964392133	HM_only
HSPA5	70	0.184993503738456	0.316556807832016	HM_only
IDS	70	1.70270509518537e-11	7.08619219913731e-10	HM_only
IGFBP1	27	0.145982225541658	0.265011680740245	HM_only
IL6	37	0.159502168858009	0.283584791814897	HM_only
ILVBL	70	0.00227134531977038	0.00829895929552737	HM_only
JMJD6	70	9.39523904140735e-07	8.72718561208115e-06	HM_only
KDELR3	69	0.000201686298362912	0.00100002105821076	HM_only
KIF5A	37	0.0818440914638355	0.1691480142412	HM_only
KLF6	70	2.65542418346697e-11	1.03701794432508e-09	HM_only
LALBA	NA	NA	NA	HM_only
LARGE1	57	0.627859184934813	0.743734510318489	HM_only
LDHC	8	0.480108007760916	0.624099988185149	HM_only
LXN	50	0.0923555909977547	0.185783233836238	HM_only
MAP3K1	70	4.32900254046898e-06	3.36343027505019e-05	HM_only
MIF	70	7.85733217127268e-15	1.1619422814878e-12	HM_only
MT1E	49	0.499729936541071	0.641233843486669	HM_only
MT2A	69	0.436203271606843	0.58609612761421	HM_only
MYH9	70	5.39370691654528e-07	5.27992969209211e-06	HM_only
NAGK	70	0.520194503410014	0.658201115531519	HM_only
NCAN	12	0.0912503204312723	0.184094098026965	HM_only
NDST1	70	0.0162080162754835	0.0448958812466002	HM_only
NDST2	69	0.230392533010066	0.371462756558336	HM_only
NEDD4L	70	0.000214587783523704	0.00105332733218031	HM_only
NOCT	66	0.00094265624570842	0.00385437803544777	HM_only
NR3C1	69	1.14375226513192e-06	1.03357822010646e-05	HM_only
PGAM2	7	0.578264527515191	0.705383618370707	HM_only
PGM2	69	0.700576473685841	0.79968030357121	HM_only
PHKG1	32	0.109202663803118	0.212001880665217	HM_only
PKLR	11	0.0969462598001413	0.192676456848556	HM_only
PKP1	22	0.00431091235012653	0.0144710438484423	HM_only
PLAC8	55	0.000629547008601834	0.00270947065285329	HM_only
PLAUR	69	0.000827106295446074	0.00343574379130802	HM_only
PPARGC1A	36	0.999562624902322	0.99967696923162	HM_only
PPP1R15A	69	3.96050575373086e-06	3.11421264194462e-05	HM_only
PRDX5	70	0.043816848996176	0.102428637836777	HM_only
PRKCA	69	0.000354664149080812	0.00163791449252395	HM_only
PYGM	27	0.00542988890156075	0.0176451502511603	HM_only
RBPJ	70	4.74093341906304e-13	3.47093320488469e-11	HM_only
S100A4	57	0.000214021968704558	0.00105124785425255	HM_only
SCARB1	58	0.00304889297035545	0.0107196931159335	HM_only
SDC2	59	5.45491183571182e-05	0.000314206321318513	HM_only
SDC3	70	0.341353390500586	0.493991447552452	HM_only
SDC4	69	1.48795443634998e-08	2.3541943870981e-07	HM_only
SELENBP1	57	0.074258178161924	0.156443623134941	HM_only
SIAH2	70	8.9379003573067e-07	8.36895338648279e-06	HM_only
SLC25A1	70	0.187371826615308	0.319517363005901	HM_only
SLC2A5	51	0.000157838661660947	0.000805980016796298	HM_only
SLC37A4	70	0.219653144202374	0.358524359433191	HM_only
SRPX	66	0.00767570206702794	0.0237564424795331	HM_only
SULT2B1	22	0.489925485561551	0.632893591388367	HM_only
TES	69	6.16642629483008e-11	2.13905963415007e-09	HM_only
TGFB3	56	0.972131025147996	0.984019822936609	HM_only
TGM2	62	0.645980214680675	0.756924616179444	HM_only
TIPARP	69	8.15157219446733e-06	5.88792492405321e-05	HM_only
TKTL1	6	0.50280707993373	0.643395826194981	HM_only
TPBG	64	5.99668427724299e-05	0.000341774025276989	HM_only
TPD52	68	4.30567332528278e-07	4.35118203651128e-06	HM_only
TPST2	70	0.15873916856825	0.282596487735227	HM_only
UGP2	70	2.20277373577371e-06	1.85223377585036e-05	HM_only
VHL	70	0.546729106615351	0.679947580339859	HM_only
XPNPEP1	70	1.8197809237243e-09	3.74828878698404e-08	HM_only
ZFP36	60	0.000706979395238341	0.00299393221557405	HM_only
ADM	68	6.26924164447069e-24	1.26422107416044e-20	MA_and_HM
AK4	70	9.5977770649399e-19	5.75399705012154e-16	MA_and_HM
AKAP12	67	2.62844103144326e-05	0.000165307850749856	MA_and_HM
ALDOA	70	1.40962852718854e-22	1.83931647000566e-19	MA_and_HM
ALDOC	66	2.22650450432297e-21	2.14731838760401e-18	MA_and_HM
AMPD3	63	4.55230489293329e-12	2.32671030265083e-10	MA_and_HM
ANGPTL4	62	2.39478414758356e-20	1.96744822080365e-17	MA_and_HM
ANKZF1	70	1.91207610314005e-19	1.3254272537454e-16	MA_and_HM
ATF3	64	6.78892830636757e-07	6.49383388063154e-06	MA_and_HM
BHLHE40	70	3.65671601638402e-22	4.5062930375239e-19	MA_and_HM
BNIP3L	70	1.07322047739138e-24	2.97577207868696e-21	MA_and_HM
BTG1	70	2.7621365039886e-17	1.03846969375382e-14	MA_and_HM
CA12	60	7.04288203289573e-06	5.15764969474061e-05	MA_and_HM
CCNG2	69	8.02941861597616e-19	5.08881610684524e-16	MA_and_HM
CDKN1C	61	9.43225714435146e-12	4.37711983213398e-10	MA_and_HM
CITED2	67	4.45314829642013e-10	1.13801538607363e-08	MA_and_HM
COL5A1	61	1.10422057611119e-08	1.80632896897481e-07	MA_and_HM
CP	30	1.12675802769822e-05	7.83503027285328e-05	MA_and_HM
CSRP2	65	8.75988949819254e-10	1.97672297913435e-08	MA_and_HM
CXCR4	46	6.58996943585904e-11	2.25036560569589e-09	MA_and_HM
DDIT3	68	5.88135588784627e-06	4.40892991903366e-05	MA_and_HM
DDIT4	70	1.34100209563235e-18	7.62720730392735e-16	MA_and_HM
DPYSL4	58	1.35869437521568e-08	2.17669899541246e-07	MA_and_HM
DUSP1	67	1.54115627669669e-11	6.56159856615852e-10	MA_and_HM
EDN2	23	0.000251708203551993	0.00121088513797231	MA_and_HM
EFNA1	63	1.06540727556122e-09	2.34453017723205e-08	MA_and_HM
EFNA3	62	5.41624654649639e-18	2.61180828031267e-15	MA_and_HM
ENO1	70	1.773867112124e-10	5.21855706646348e-09	MA_and_HM
ENO2	69	3.46355339899664e-23	5.90988780742642e-20	MA_and_HM
ERO1A	70	4.19015160461063e-21	3.87274762056137e-18	MA_and_HM
ERRFI1	67	2.92021556707492e-14	3.46396907533989e-12	MA_and_HM
F3	60	6.47481560033273e-06	4.7986755645366e-05	MA_and_HM
FAM162A	70	1.80115486772527e-15	3.41480489537452e-13	MA_and_HM
FOS	63	1.75741249039498e-06	1.51331226172133e-05	MA_and_HM
FOSL2	69	1.30181976847825e-12	7.80458543361745e-11	MA_and_HM
GAPDH	70	7.58768855084723e-16	1.60295340414184e-13	MA_and_HM
GBE1	70	5.81061279674648e-14	6.02294453539395e-12	MA_and_HM
GPI	70	7.48915239775348e-12	3.57720123379147e-10	MA_and_HM
GYS1	70	2.18607130076304e-10	6.20889034488166e-09	MA_and_HM
HK2	59	5.54762954706312e-13	3.85760246435593e-11	MA_and_HM
IER3	68	1.40505583966133e-09	3.00839272542159e-08	MA_and_HM
IGFBP3	66	1.20622675643332e-13	1.08766349232536e-11	MA_and_HM
INHA	31	4.10595993771929e-07	4.16834797887823e-06	MA_and_HM
IRS2	70	4.48399147441625e-08	6.17404710648673e-07	MA_and_HM
ISG20	63	1.10788169106531e-12	6.8454127217857e-11	MA_and_HM
JUN	69	1.81172120684832e-13	1.54391662147377e-11	MA_and_HM
KDM3A	70	9.96455421219973e-26	4.42067483070029e-22	MA_and_HM
KLF7	69	6.44240003458691e-14	6.57266597223388e-12	MA_and_HM
KLHL24	69	1.25635995458983e-11	5.56259012229774e-10	MA_and_HM
LDHA	70	7.91794053226277e-20	5.8545252295551e-17	MA_and_HM
LOX	58	2.0953039815171e-12	1.20409411704695e-10	MA_and_HM
MAFF	70	1.34643480822712e-11	5.86770469864324e-10	MA_and_HM
MXI1	69	8.22005361949982e-28	1.82337229387745e-23	MA_and_HM
NDRG1	69	8.90885545121942e-20	6.37471714899836e-17	MA_and_HM
NFIL3	68	6.82681076593401e-21	5.82431986192108e-18	MA_and_HM
P4HA1	70	2.4915202721838e-27	2.76334513387905e-23	MA_and_HM
P4HA2	70	5.16177117239167e-16	1.15654957723224e-13	MA_and_HM
PAM	69	7.66159240518517e-15	1.14060028679072e-12	MA_and_HM
PCK1	10	0.00154020440759431	0.00592419181017115	MA_and_HM
PDGFB	57	7.24945693527472e-08	9.21004889680777e-07	MA_and_HM
PDK1	70	6.35719290508059e-21	5.64061012081991e-18	MA_and_HM
PDK3	70	5.64892437349849e-11	1.97641073269627e-09	MA_and_HM
PFKFB3	70	8.3442614206784e-14	8.08263785299075e-12	MA_and_HM
PFKL	70	3.97600459781712e-17	1.41080229101073e-14	MA_and_HM
PFKP	70	3.7493021361088e-14	4.28695979294667e-12	MA_and_HM
PGF	57	7.6295550503979e-05	0.00042256876436436	MA_and_HM
PGK1	70	1.53975097765709e-14	2.03302120157081e-12	MA_and_HM
PGM1	69	1.65955958871645e-18	9.07374397906564e-16	MA_and_HM
PIM1	69	2.39850936489959e-10	6.71764327426801e-09	MA_and_HM
PLIN2	62	1.93061726418434e-06	1.64458341605749e-05	MA_and_HM
PNRC1	68	1.31930370208997e-14	1.79538617912636e-12	MA_and_HM
PPFIA4	60	1.32042100319681e-17	5.34359003096028e-15	MA_and_HM
PPP1R3C	51	4.29806795266355e-17	1.41384789178426e-14	MA_and_HM
RORA	62	4.98953112931652e-15	8.04426501916075e-13	MA_and_HM
RRAGD	61	1.95672377153372e-10	5.67373159479227e-09	MA_and_HM
SAP30	69	4.60652263574719e-10	1.16380279164173e-08	MA_and_HM
SERPINE1	62	2.1817138392071e-07	2.38397913208335e-06	MA_and_HM
SLC2A1	70	1.9501508200819e-26	1.44194151636855e-22	MA_and_HM
SLC2A3	70	4.31967692751413e-22	5.04310913716412e-19	MA_and_HM
SLC6A6	70	1.92049780583964e-10	5.59061447888909e-09	MA_and_HM
STBD1	59	1.73252784181888e-15	3.31301142993332e-13	MA_and_HM
STC1	63	1.78719641828495e-16	4.83458426224351e-14	MA_and_HM
STC2	63	9.52321568636983e-11	3.09288389978119e-09	MA_and_HM
TGFBI	56	1.3166299828019e-05	8.97525700015724e-05	MA_and_HM
TMEM45A	69	1.68568960901179e-18	9.07374397906564e-16	MA_and_HM
TNFAIP3	67	1.55308076341291e-10	4.66176420758121e-09	MA_and_HM
TPI1	70	2.61404604281261e-20	1.9994748041955e-17	MA_and_HM
VEGFA	69	3.40120986780094e-16	8.02613162633622e-14	MA_and_HM
VLDLR	64	8.9279718061096e-19	5.50111862786453e-16	MA_and_HM
WSB1	70	2.95133043126087e-15	5.15483556112037e-13	MA_and_HM
ZNF292	69	3.24520742345756e-23	5.90988780742642e-20	MA_and_HM
